# Supplementary material for: A crystalline monosubstituted carbene
Source: Springer Nature journal article supplement (doi:10.1038/s41557-018-0153-1), 2018-10-05
Supplement: 41557_2018_153_MOESM36_ESM.mol [file 41557_2018_153_MOESM36_ESM.mol]

nchem.18010067C-comp3c.mol
  ChemDraw09031813422D

147160  0  0  0  0  0  0  0  0999 V2000
    0.1289   -0.8126    0.0000 C   0  0  0  0  0  0  0  0  0  0  0  0
    0.6138   -0.1451    0.0000 N   0  0  0  0  0  0  0  0  0  0  0  0
    0.1289    0.5223    0.0000 C   0  0  0  0  0  0  0  0  0  0  0  0
   -0.6557    0.2674    0.0000 C   0  0  0  0  0  0  0  0  0  0  0  0
   -1.3702    0.6799    0.0000 C   0  0  0  0  0  0  0  0  0  0  0  0
   -2.0846    0.2674    0.0000 C   0  0  0  0  0  0  0  0  0  0  0  0
   -2.0846   -0.5576    0.0000 C   0  0  0  0  0  0  0  0  0  0  0  0
   -1.3702   -0.9701    0.0000 C   0  0  0  0  0  0  0  0  0  0  0  0
   -0.6557   -0.5576    0.0000 C   0  0  0  0  0  0  0  0  0  0  0  0
   -1.7631    3.5152    0.0000 C   0  0  0  0  0  0  0  0  0  0  0  0
   -1.1107    4.0201    0.0000 C   0  0  0  0  0  0  0  0  0  0  0  0
   -1.2217    4.8376    0.0000 C   0  0  0  0  0  0  0  0  0  0  0  0
   -1.9852    5.1502    0.0000 C   0  0  0  0  0  0  0  0  0  0  0  0
   -2.6376    4.6453    0.0000 C   0  0  0  0  0  0  0  0  0  0  0  0
   -2.5266    3.8278    0.0000 C   0  0  0  0  0  0  0  0  0  0  0  0
   -1.6772    2.8990    0.0000 C   0  0  0  0  0  0  0  0  0  0  0  0
   -2.3768    2.4618    0.0000 C   0  0  0  0  0  0  0  0  0  0  0  0
   -2.3480    1.6373    0.0000 C   0  0  0  0  0  0  0  0  0  0  0  0
   -1.6196    1.2500    0.0000 C   0  0  0  0  0  0  0  0  0  0  0  0
   -0.9199    1.6872    0.0000 C   0  0  0  0  0  0  0  0  0  0  0  0
   -0.9487    2.5117    0.0000 C   0  0  0  0  0  0  0  0  0  0  0  0
   -3.0477    1.2002    0.0000 C   0  0  0  0  0  0  0  0  0  0  0  0
   -3.7761    1.5875    0.0000 C   0  0  0  0  0  0  0  0  0  0  0  0
   -4.4757    1.1503    0.0000 C   0  0  0  0  0  0  0  0  0  0  0  0
   -4.4469    0.3258    0.0000 C   0  0  0  0  0  0  0  0  0  0  0  0
   -3.7185   -0.0615    0.0000 C   0  0  0  0  0  0  0  0  0  0  0  0
   -3.0189    0.3757    0.0000 C   0  0  0  0  0  0  0  0  0  0  0  0
    4.0779    2.4251    0.0000 C   0  0  0  0  0  0  0  0  0  0  0  0
    4.3695    1.6534    0.0000 C   0  0  0  0  0  0  0  0  0  0  0  0
    5.1836    1.5200    0.0000 C   0  0  0  0  0  0  0  0  0  0  0  0
    5.7062    2.1584    0.0000 C   0  0  0  0  0  0  0  0  0  0  0  0
    5.4147    2.9301    0.0000 C   0  0  0  0  0  0  0  0  0  0  0  0
    4.6005    3.0635    0.0000 C   0  0  0  0  0  0  0  0  0  0  0  0
    3.2638    2.5585    0.0000 C   0  0  0  0  0  0  0  0  0  0  0  0
    3.1107    3.3692    0.0000 C   0  0  0  0  0  0  0  0  0  0  0  0
    2.3321    3.6419    0.0000 C   0  0  0  0  0  0  0  0  0  0  0  0
    1.7066    3.1040    0.0000 C   0  0  0  0  0  0  0  0  0  0  0  0
    1.8597    2.2933    0.0000 C   0  0  0  0  0  0  0  0  0  0  0  0
    2.6383    2.0206    0.0000 C   0  0  0  0  0  0  0  0  0  0  0  0
    2.2662    4.3070    0.0000 C   0  0  0  0  0  0  0  0  0  0  0  0
    1.5030    4.6203    0.0000 C   0  0  0  0  0  0  0  0  0  0  0  0
    1.3926    5.4379    0.0000 C   0  0  0  0  0  0  0  0  0  0  0  0
    2.0455    5.9422    0.0000 C   0  0  0  0  0  0  0  0  0  0  0  0
    2.8087    5.6290    0.0000 C   0  0  0  0  0  0  0  0  0  0  0  0
    2.9191    4.8114    0.0000 C   0  0  0  0  0  0  0  0  0  0  0  0
    1.3187   -3.1488    0.0000 C   0  0  0  0  0  0  0  0  0  0  0  0
    2.0111   -3.5973    0.0000 C   0  0  0  0  0  0  0  0  0  0  0  0
    1.9689   -4.4213    0.0000 C   0  0  0  0  0  0  0  0  0  0  0  0
    1.2342   -4.7966    0.0000 C   0  0  0  0  0  0  0  0  0  0  0  0
    0.5418   -4.3481    0.0000 C   0  0  0  0  0  0  0  0  0  0  0  0
    0.5841   -3.5242    0.0000 C   0  0  0  0  0  0  0  0  0  0  0  0
    1.3727   -2.4426    0.0000 C   0  0  0  0  0  0  0  0  0  0  0  0
    2.1045   -2.0618    0.0000 C   0  0  0  0  0  0  0  0  0  0  0  0
    2.1407   -1.2376    0.0000 C   0  0  0  0  0  0  0  0  0  0  0  0
    1.4450   -0.7942    0.0000 C   0  0  0  0  0  0  0  0  0  0  0  0
    0.7131   -1.1750    0.0000 C   0  0  0  0  0  0  0  0  0  0  0  0
    0.6770   -1.9992    0.0000 C   0  0  0  0  0  0  0  0  0  0  0  0
    2.8468   -0.9962    0.0000 C   0  0  0  0  0  0  0  0  0  0  0  0
    3.4550   -1.5537    0.0000 C   0  0  0  0  0  0  0  0  0  0  0  0
    4.2418   -1.3058    0.0000 C   0  0  0  0  0  0  0  0  0  0  0  0
    4.4205   -0.5003    0.0000 C   0  0  0  0  0  0  0  0  0  0  0  0
    3.8124    0.0571    0.0000 C   0  0  0  0  0  0  0  0  0  0  0  0
    3.0255   -0.1908    0.0000 C   0  0  0  0  0  0  0  0  0  0  0  0
   -3.7829   -2.1014    0.0000 C   0  0  0  0  0  0  0  0  0  0  0  0
   -3.8408   -1.2784    0.0000 C   0  0  0  0  0  0  0  0  0  0  0  0
   -4.5824   -0.9170    0.0000 C   0  0  0  0  0  0  0  0  0  0  0  0
   -5.2662   -1.3787    0.0000 C   0  0  0  0  0  0  0  0  0  0  0  0
   -5.2083   -2.2016    0.0000 C   0  0  0  0  0  0  0  0  0  0  0  0
   -4.4666   -2.5630    0.0000 C   0  0  0  0  0  0  0  0  0  0  0  0
   -3.0412   -2.4627    0.0000 C   0  0  0  0  0  0  0  0  0  0  0  0
   -2.9833   -3.2857    0.0000 C   0  0  0  0  0  0  0  0  0  0  0  0
   -2.2417   -3.6471    0.0000 C   0  0  0  0  0  0  0  0  0  0  0  0
   -1.5579   -3.1855    0.0000 C   0  0  0  0  0  0  0  0  0  0  0  0
   -1.6158   -2.3625    0.0000 C   0  0  0  0  0  0  0  0  0  0  0  0
   -2.3575   -2.0011    0.0000 C   0  0  0  0  0  0  0  0  0  0  0  0
   -2.1713   -4.4030    0.0000 C   0  0  0  0  0  0  0  0  0  0  0  0
   -2.8778   -4.8291    0.0000 C   0  0  0  0  0  0  0  0  0  0  0  0
   -2.8620   -5.6539    0.0000 C   0  0  0  0  0  0  0  0  0  0  0  0
   -2.1398   -6.0527    0.0000 C   0  0  0  0  0  0  0  0  0  0  0  0
   -1.4333   -5.6266    0.0000 C   0  0  0  0  0  0  0  0  0  0  0  0
   -1.4491   -4.8018    0.0000 C   0  0  0  0  0  0  0  0  0  0  0  0
    1.4388   -0.1451    0.0000 C   0  0  0  0  0  0  0  0  0  0  0  0
    1.8513    0.5694    0.0000 H   0  0  0  0  0  0  0  0  0  0  0  0
   -3.6897   -0.8860    0.0000 C   0  0  0  0  0  0  0  0  0  0  0  0
   -4.5105   -0.9147    0.0000 F   0  0  0  0  0  0  0  0  0  0  0  0
   -3.6611   -1.7068    0.0000 F   0  0  0  0  0  0  0  0  0  0  0  0
   -2.8689   -0.8574    0.0000 F   0  0  0  0  0  0  0  0  0  0  0  0
   -3.4011    4.9579    0.0000 C   0  0  0  0  0  0  0  0  0  0  0  0
   -3.0899    5.7179    0.0000 F   0  0  0  0  0  0  0  0  0  0  0  0
   -4.1612    5.2690    0.0000 F   0  0  0  0  0  0  0  0  0  0  0  0
   -3.7123    4.1978    0.0000 F   0  0  0  0  0  0  0  0  0  0  0  0
   -5.2042    1.5376    0.0000 C   0  0  0  0  0  0  0  0  0  0  0  0
   -4.8186    2.2627    0.0000 F   0  0  0  0  0  0  0  0  0  0  0  0
   -5.9293    1.9232    0.0000 F   0  0  0  0  0  0  0  0  0  0  0  0
   -5.5897    0.8125    0.0000 F   0  0  0  0  0  0  0  0  0  0  0  0
   -0.5737    5.3430    0.0000 C   0  0  0  0  0  0  0  0  0  0  0  0
   -0.0686    4.6954    0.0000 F   0  0  0  0  0  0  0  0  0  0  0  0
    0.0739    5.8480    0.0000 F   0  0  0  0  0  0  0  0  0  0  0  0
   -1.0787    5.9906    0.0000 F   0  0  0  0  0  0  0  0  0  0  0  0
    3.4616    6.1333    0.0000 C   0  0  0  0  0  0  0  0  0  0  0  0
    3.9637    5.4834    0.0000 F   0  0  0  0  0  0  0  0  0  0  0  0
    4.1115    6.6354    0.0000 F   0  0  0  0  0  0  0  0  0  0  0  0
    2.9595    6.7833    0.0000 F   0  0  0  0  0  0  0  0  0  0  0  0
    5.9373    3.5685    0.0000 C   0  0  0  0  0  0  0  0  0  0  0  0
    6.5727    3.0483    0.0000 F   0  0  0  0  0  0  0  0  0  0  0  0
    6.4575    4.2040    0.0000 F   0  0  0  0  0  0  0  0  0  0  0  0
    5.3018    4.0887    0.0000 F   0  0  0  0  0  0  0  0  0  0  0  0
    0.6294    5.7511    0.0000 C   0  0  0  0  0  0  0  0  0  0  0  0
    0.9412    6.5109    0.0000 F   0  0  0  0  0  0  0  0  0  0  0  0
   -0.1304    6.0629    0.0000 F   0  0  0  0  0  0  0  0  0  0  0  0
    0.3176    4.9913    0.0000 F   0  0  0  0  0  0  0  0  0  0  0  0
    5.4752    0.7482    0.0000 C   0  0  0  0  0  0  0  0  0  0  0  0
    4.7069    0.4580    0.0000 F   0  0  0  0  0  0  0  0  0  0  0  0
    5.7654   -0.0201    0.0000 F   0  0  0  0  0  0  0  0  0  0  0  0
    6.2435    1.0385    0.0000 F   0  0  0  0  0  0  0  0  0  0  0  0
    3.9911    0.8625    0.0000 C   0  0  0  0  0  0  0  0  0  0  0  0
    4.7929    0.6846    0.0000 F   0  0  0  0  0  0  0  0  0  0  0  0
    4.1690    1.6643    0.0000 F   0  0  0  0  0  0  0  0  0  0  0  0
    3.1893    1.0404    0.0000 F   0  0  0  0  0  0  0  0  0  0  0  0
   -0.1928   -4.7235    0.0000 C   0  0  0  0  0  0  0  0  0  0  0  0
   -0.5665   -3.9922    0.0000 F   0  0  0  0  0  0  0  0  0  0  0  0
   -0.9242   -5.0972    0.0000 F   0  0  0  0  0  0  0  0  0  0  0  0
    0.1809   -5.4548    0.0000 F   0  0  0  0  0  0  0  0  0  0  0  0
    4.8500   -1.8632    0.0000 C   0  0  0  0  0  0  0  0  0  0  0  0
    4.2950   -2.4686    0.0000 F   0  0  0  0  0  0  0  0  0  0  0  0
    5.4554   -2.4182    0.0000 F   0  0  0  0  0  0  0  0  0  0  0  0
    5.4049   -1.2578    0.0000 F   0  0  0  0  0  0  0  0  0  0  0  0
    2.6613   -4.8698    0.0000 C   0  0  0  0  0  0  0  0  0  0  0  0
    2.2148   -5.5591    0.0000 F   0  0  0  0  0  0  0  0  0  0  0  0
    3.3506   -5.3163    0.0000 F   0  0  0  0  0  0  0  0  0  0  0  0
    3.1078   -4.1805    0.0000 F   0  0  0  0  0  0  0  0  0  0  0  0
   -0.7111   -6.0254    0.0000 C   0  0  0  0  0  0  0  0  0  0  0  0
   -1.1081   -6.7444    0.0000 F   0  0  0  0  0  0  0  0  0  0  0  0
    0.0078   -6.4224    0.0000 F   0  0  0  0  0  0  0  0  0  0  0  0
   -0.3141   -5.3065    0.0000 F   0  0  0  0  0  0  0  0  0  0  0  0
   -5.8921   -2.6632    0.0000 C   0  0  0  0  0  0  0  0  0  0  0  0
   -6.3516   -1.9826    0.0000 F   0  0  0  0  0  0  0  0  0  0  0  0
   -6.5727   -3.1227    0.0000 F   0  0  0  0  0  0  0  0  0  0  0  0
   -5.4325   -3.3439    0.0000 F   0  0  0  0  0  0  0  0  0  0  0  0
   -3.5685   -6.0800    0.0000 C   0  0  0  0  0  0  0  0  0  0  0  0
   -3.9926   -5.3767    0.0000 F   0  0  0  0  0  0  0  0  0  0  0  0
   -4.2717   -6.5041    0.0000 F   0  0  0  0  0  0  0  0  0  0  0  0
   -3.1443   -6.7833    0.0000 F   0  0  0  0  0  0  0  0  0  0  0  0
   -4.6403   -0.0941    0.0000 C   0  0  0  0  0  0  0  0  0  0  0  0
   -3.8210   -0.0365    0.0000 F   0  0  0  0  0  0  0  0  0  0  0  0
   -4.6979    0.7252    0.0000 F   0  0  0  0  0  0  0  0  0  0  0  0
   -5.4595   -0.1517    0.0000 F   0  0  0  0  0  0  0  0  0  0  0  0
 84 85  1  0      
 84 86  1  0      
 84 87  1  0      
 26 84  1  0      
 88 89  1  0      
 88 90  1  0      
 88 91  1  0      
 14 88  1  0      
 92 93  1  0      
 92 94  1  0      
 92 95  1  0      
 24 92  1  0      
 96 97  1  0      
 96 98  1  0      
 96 99  1  0      
 12 96  1  0      
100101  1  0      
100102  1  0      
100103  1  0      
 44100  1  0      
104105  1  0      
104106  1  0      
104107  1  0      
 32104  1  0      
108109  1  0      
108110  1  0      
108111  1  0      
 42108  1  0      
112113  1  0      
112114  1  0      
112115  1  0      
 30112  1  0      
116117  1  0      
116118  1  0      
116119  1  0      
 62116  1  0      
120121  1  0      
120122  1  0      
120123  1  0      
 50120  1  0      
124125  1  0      
124126  1  0      
124127  1  0      
 60124  1  0      
128129  1  0      
128130  1  0      
128131  1  0      
 48128  1  0      
132133  1  0      
132134  1  0      
132135  1  0      
 80132  1  0      
136137  1  0      
136138  1  0      
136139  1  0      
 68136  1  0      
140141  1  0      
140142  1  0      
140143  1  0      
 78140  1  0      
144145  1  0      
144146  1  0      
144147  1  0      
 66144  1  0      
  1  2  1  0      
  2  3  1  0      
  3  4  1  0      
  4  5  1  0      
  5  6  2  0      
  6  7  1  0      
  7  8  2  0      
  8  9  1  0      
  1  9  1  0      
  4  9  2  0      
 10 11  1  0      
 11 12  2  0      
 12 13  1  0      
 13 14  2  0      
 14 15  1  0      
 10 15  2  0      
 16 17  1  0      
 17 18  2  0      
 18 19  1  0      
 19 20  2  0      
 20 21  1  0      
 16 21  2  0      
 10 16  1  0      
 22 23  1  0      
 23 24  2  0      
 24 25  1  0      
 25 26  2  0      
 26 27  1  0      
 22 27  2  0      
 18 22  1  0      
  3 20  1  0      
 28 29  1  0      
 29 30  2  0      
 30 31  1  0      
 31 32  2  0      
 32 33  1  0      
 28 33  2  0      
 34 35  1  0      
 35 36  2  0      
 36 37  1  0      
 37 38  2  0      
 38 39  1  0      
 34 39  2  0      
 28 34  1  0      
 40 41  1  0      
 41 42  2  0      
 42 43  1  0      
 43 44  2  0      
 44 45  1  0      
 40 45  2  0      
 36 40  1  0      
  3 38  1  0      
 46 47  1  0      
 47 48  2  0      
 48 49  1  0      
 49 50  2  0      
 50 51  1  0      
 46 51  2  0      
 52 53  1  0      
 53 54  2  0      
 54 55  1  0      
 55 56  2  0      
 56 57  1  0      
 52 57  2  0      
 46 52  1  0      
 58 59  1  0      
 59 60  2  0      
 60 61  1  0      
 61 62  2  0      
 62 63  1  0      
 58 63  2  0      
 54 58  1  0      
  1 56  1  0      
 64 65  1  0      
 65 66  2  0      
 66 67  1  0      
 67 68  2  0      
 68 69  1  0      
 64 69  2  0      
 70 71  1  0      
 71 72  2  0      
 72 73  1  0      
 73 74  2  0      
 74 75  1  0      
 70 75  2  0      
 64 70  1  0      
 76 77  1  0      
 77 78  2  0      
 78 79  1  0      
 79 80  2  0      
 80 81  1  0      
 76 81  2  0      
 72 76  1  0      
  1 74  1  0      
  2 82  1  0      
 82 83  1  0      
M  RAD  1  82   1
M  STY  1   1 SUP
M  SLB  1   1   1
M  SAL   1  4  84  85  86  87
M  SBL   1  1   4
M  SMT   1 CF3
M  SBV   1   4   -0.0288    0.8245
M  STY  1   2 SUP
M  SLB  1   2   2
M  SAL   2  4  88  89  90  91
M  SBL   2  1   8
M  SMT   2 CF3
M  SBV   2   8    0.7635   -0.3126
M  STY  1   3 SUP
M  SLB  1   3   3
M  SAL   3  4  92  93  94  95
M  SBL   3  1  12
M  SMT   3 CF3
M  SBV   3  12    0.7284   -0.3873
M  STY  1   4 SUP
M  SLB  1   4   4
M  SAL   4  4  96  97  98  99
M  SBL   4  1  16
M  SMT   4 CF3
M  SBV   4  16   -0.6480   -0.5054
M  STY  1   5 SUP
M  SLB  1   5   5
M  SAL   5  4 100 101 102 103
M  SBL   5  1  20
M  SMT   5 CF3
M  SBV   5  20   -0.6529   -0.5044
M  STY  1   6 SUP
M  SLB  1   6   6
M  SAL   6  4 104 105 106 107
M  SBL   6  1  24
M  SMT   6 CF3
M  SBV   6  24   -0.5226   -0.6384
M  STY  1   7 SUP
M  SLB  1   7   7
M  SAL   7  4 108 109 110 111
M  SBL   7  1  28
M  SMT   7 CF3
M  SBV   7  28    0.7632   -0.3132
M  STY  1   8 SUP
M  SLB  1   8   8
M  SAL   8  4 112 113 114 115
M  SBL   8  1  32
M  SMT   8 CF3
M  SBV   8  32   -0.2916    0.7718
M  STY  1   9 SUP
M  SLB  1   9   9
M  SAL   9  4 116 117 118 119
M  SBL   9  1  36
M  SMT   9 CF3
M  SBV   9  36   -0.1787   -0.8054
M  STY  1  10 SUP
M  SLB  1  10  10
M  SAL  10  4 120 121 122 123
M  SBL  10  1  40
M  SMT  10 CF3
M  SBV  10  40    0.7347    0.3754
M  STY  1  11 SUP
M  SLB  1  11  11
M  SAL  11  4 124 125 126 127
M  SBL  11  1  44
M  SMT  11 CF3
M  SBV  11  44   -0.6082    0.5575
M  STY  1  12 SUP
M  SLB  1  12  12
M  SAL  12  4 128 129 130 131
M  SBL  12  1  48
M  SMT  12 CF3
M  SBV  12  48   -0.6924    0.4485
M  STY  1  13 SUP
M  SLB  1  13  13
M  SAL  13  4 132 133 134 135
M  SBL  13  1  52
M  SMT  13 CF3
M  SBV  13  52   -0.7222    0.3988
M  STY  1  14 SUP
M  SLB  1  14  14
M  SAL  14  4 136 137 138 139
M  SBL  14  1  56
M  SMT  14 CF3
M  SBV  14  56    0.6838    0.4616
M  STY  1  15 SUP
M  SLB  1  15  15
M  SAL  15  4 140 141 142 143
M  SBL  15  1  60
M  SMT  15 CF3
M  SBV  15  60    0.7065    0.4261
M  STY  1  16 SUP
M  SLB  1  16  16
M  SAL  16  4 144 145 146 147
M  SBL  16  1  64
M  SMT  16 CF3
M  SBV  16  64    0.0579   -0.8230
M  END
