# Supplementary material for: A crystalline monosubstituted carbene
Source: Springer Nature journal article supplement (doi:10.1038/s41557-018-0153-1), 2018-10-05
Supplement: 41557_2018_153_MOESM45_ESM.mol [file 41557_2018_153_MOESM45_ESM.mol]

nchem.18010067C-comp4b.mol
  ChemDraw09031813422D

164191  0  0  0  0  0  0  0  0999 V2000
    1.3855   -1.5331    0.0000 C   0  0  0  0  0  0  0  0  0  0  0  0
   -1.6228    1.9316    0.0000 C   0  0  0  0  0  0  0  0  0  0  0  0
   -3.9346    1.2520    0.0000 C   0  0  0  0  0  0  0  0  0  0  0  0
   -3.4497    1.9195    0.0000 N   0  0  0  0  0  0  0  0  0  0  0  0
   -3.9346    2.5869    0.0000 C   0  0  0  0  0  0  0  0  0  0  0  0
   -4.7192    2.3320    0.0000 C   0  0  0  0  0  0  0  0  0  0  0  0
   -5.4337    2.7445    0.0000 C   0  0  0  0  0  0  0  0  0  0  0  0
   -6.1481    2.3320    0.0000 C   0  0  0  0  0  0  0  0  0  0  0  0
   -6.1481    1.5070    0.0000 C   0  0  0  0  0  0  0  0  0  0  0  0
   -5.4337    1.0945    0.0000 C   0  0  0  0  0  0  0  0  0  0  0  0
   -4.7192    1.5070    0.0000 C   0  0  0  0  0  0  0  0  0  0  0  0
   -4.9234    5.6383    0.0000 C   0  0  0  0  0  0  0  0  0  0  0  0
   -5.5735    6.1462    0.0000 C   0  0  0  0  0  0  0  0  0  0  0  0
   -5.4587    6.9632    0.0000 C   0  0  0  0  0  0  0  0  0  0  0  0
   -4.6938    7.2723    0.0000 C   0  0  0  0  0  0  0  0  0  0  0  0
   -4.0437    6.7643    0.0000 C   0  0  0  0  0  0  0  0  0  0  0  0
   -4.1585    5.9474    0.0000 C   0  0  0  0  0  0  0  0  0  0  0  0
   -5.0382    4.8213    0.0000 C   0  0  0  0  0  0  0  0  0  0  0  0
   -5.8031    4.5123    0.0000 C   0  0  0  0  0  0  0  0  0  0  0  0
   -5.9180    3.6953    0.0000 C   0  0  0  0  0  0  0  0  0  0  0  0
   -5.2679    3.1874    0.0000 C   0  0  0  0  0  0  0  0  0  0  0  0
   -4.5029    3.4965    0.0000 C   0  0  0  0  0  0  0  0  0  0  0  0
   -4.3881    4.3134    0.0000 C   0  0  0  0  0  0  0  0  0  0  0  0
   -6.6829    3.3863    0.0000 C   0  0  0  0  0  0  0  0  0  0  0  0
   -6.7977    2.5693    0.0000 C   0  0  0  0  0  0  0  0  0  0  0  0
   -7.5626    2.2603    0.0000 C   0  0  0  0  0  0  0  0  0  0  0  0
   -8.2127    2.7682    0.0000 C   0  0  0  0  0  0  0  0  0  0  0  0
   -8.0979    3.5851    0.0000 C   0  0  0  0  0  0  0  0  0  0  0  0
   -7.3330    3.8942    0.0000 C   0  0  0  0  0  0  0  0  0  0  0  0
   -0.7073    3.8926    0.0000 C   0  0  0  0  0  0  0  0  0  0  0  0
   -0.2948    4.6070    0.0000 C   0  0  0  0  0  0  0  0  0  0  0  0
    0.5302    4.6070    0.0000 C   0  0  0  0  0  0  0  0  0  0  0  0
    0.9427    3.8926    0.0000 C   0  0  0  0  0  0  0  0  0  0  0  0
    0.5302    3.1781    0.0000 C   0  0  0  0  0  0  0  0  0  0  0  0
   -0.2948    3.1781    0.0000 C   0  0  0  0  0  0  0  0  0  0  0  0
   -1.5198    4.0358    0.0000 C   0  0  0  0  0  0  0  0  0  0  0  0
   -1.6630    4.8483    0.0000 C   0  0  0  0  0  0  0  0  0  0  0  0
   -2.4383    5.1305    0.0000 C   0  0  0  0  0  0  0  0  0  0  0  0
   -3.0703    4.6002    0.0000 C   0  0  0  0  0  0  0  0  0  0  0  0
   -2.9270    3.7877    0.0000 C   0  0  0  0  0  0  0  0  0  0  0  0
   -2.1518    3.5055    0.0000 C   0  0  0  0  0  0  0  0  0  0  0  0
   -2.5815    5.9429    0.0000 C   0  0  0  0  0  0  0  0  0  0  0  0
   -3.3568    6.2251    0.0000 C   0  0  0  0  0  0  0  0  0  0  0  0
   -3.5001    7.0376    0.0000 C   0  0  0  0  0  0  0  0  0  0  0  0
   -2.8681    7.5679    0.0000 C   0  0  0  0  0  0  0  0  0  0  0  0
   -2.0928    7.2857    0.0000 C   0  0  0  0  0  0  0  0  0  0  0  0
   -1.9496    6.4732    0.0000 C   0  0  0  0  0  0  0  0  0  0  0  0
   -4.0590   -1.7985    0.0000 C   0  0  0  0  0  0  0  0  0  0  0  0
   -4.0590   -2.6235    0.0000 C   0  0  0  0  0  0  0  0  0  0  0  0
   -4.7734   -3.0360    0.0000 C   0  0  0  0  0  0  0  0  0  0  0  0
   -5.4879   -2.6235    0.0000 C   0  0  0  0  0  0  0  0  0  0  0  0
   -5.4879   -1.7985    0.0000 C   0  0  0  0  0  0  0  0  0  0  0  0
   -4.7734   -1.3860    0.0000 C   0  0  0  0  0  0  0  0  0  0  0  0
   -3.6465   -1.0840    0.0000 C   0  0  0  0  0  0  0  0  0  0  0  0
   -2.8340   -1.2273    0.0000 C   0  0  0  0  0  0  0  0  0  0  0  0
   -2.3037   -0.5953    0.0000 C   0  0  0  0  0  0  0  0  0  0  0  0
   -2.5859    0.1800    0.0000 C   0  0  0  0  0  0  0  0  0  0  0  0
   -3.3983    0.3232    0.0000 C   0  0  0  0  0  0  0  0  0  0  0  0
   -3.9286   -0.3088    0.0000 C   0  0  0  0  0  0  0  0  0  0  0  0
   -1.5285   -0.8774    0.0000 C   0  0  0  0  0  0  0  0  0  0  0  0
   -0.8965   -0.3471    0.0000 C   0  0  0  0  0  0  0  0  0  0  0  0
   -0.1212   -0.6293    0.0000 C   0  0  0  0  0  0  0  0  0  0  0  0
    0.0220   -1.4418    0.0000 C   0  0  0  0  0  0  0  0  0  0  0  0
   -0.6099   -1.9721    0.0000 C   0  0  0  0  0  0  0  0  0  0  0  0
   -1.3852   -1.6899    0.0000 C   0  0  0  0  0  0  0  0  0  0  0  0
   -6.7142   -0.0623    0.0000 C   0  0  0  0  0  0  0  0  0  0  0  0
   -7.2107   -0.7212    0.0000 C   0  0  0  0  0  0  0  0  0  0  0  0
   -8.0296   -0.6206    0.0000 C   0  0  0  0  0  0  0  0  0  0  0  0
   -8.3519    0.1388    0.0000 C   0  0  0  0  0  0  0  0  0  0  0  0
   -7.8554    0.7977    0.0000 C   0  0  0  0  0  0  0  0  0  0  0  0
   -7.0366    0.6971    0.0000 C   0  0  0  0  0  0  0  0  0  0  0  0
   -5.8954   -0.1628    0.0000 C   0  0  0  0  0  0  0  0  0  0  0  0
   -5.5730   -0.9222    0.0000 C   0  0  0  0  0  0  0  0  0  0  0  0
   -4.7542   -1.0228    0.0000 C   0  0  0  0  0  0  0  0  0  0  0  0
   -4.2577   -0.3639    0.0000 C   0  0  0  0  0  0  0  0  0  0  0  0
   -4.5800    0.3955    0.0000 C   0  0  0  0  0  0  0  0  0  0  0  0
   -5.3989    0.4961    0.0000 C   0  0  0  0  0  0  0  0  0  0  0  0
   -4.2969   -3.0035    0.0000 C   0  0  0  0  0  0  0  0  0  0  0  0
   -3.4730   -2.9603    0.0000 C   0  0  0  0  0  0  0  0  0  0  0  0
   -3.0237   -3.6522    0.0000 C   0  0  0  0  0  0  0  0  0  0  0  0
   -3.3982   -4.3873    0.0000 C   0  0  0  0  0  0  0  0  0  0  0  0
   -4.2221   -4.4305    0.0000 C   0  0  0  0  0  0  0  0  0  0  0  0
   -4.6714   -3.7386    0.0000 C   0  0  0  0  0  0  0  0  0  0  0  0
    3.9570   -1.0870    0.0000 C   0  0  0  0  0  0  0  0  0  0  0  0
    3.2730   -1.5483    0.0000 N   0  0  0  0  0  0  0  0  0  0  0  0
    3.5004   -2.3414    0.0000 C   0  0  0  0  0  0  0  0  0  0  0  0
    4.3249   -2.3701    0.0000 C   0  0  0  0  0  0  0  0  0  0  0  0
    4.8552   -3.0021    0.0000 C   0  0  0  0  0  0  0  0  0  0  0  0
    5.6677   -2.8589    0.0000 C   0  0  0  0  0  0  0  0  0  0  0  0
    5.9499   -2.0836    0.0000 C   0  0  0  0  0  0  0  0  0  0  0  0
    5.4196   -1.4516    0.0000 C   0  0  0  0  0  0  0  0  0  0  0  0
    4.6071   -1.5949    0.0000 C   0  0  0  0  0  0  0  0  0  0  0  0
    2.2845   -5.1944    0.0000 C   0  0  0  0  0  0  0  0  0  0  0  0
    1.6525   -5.7247    0.0000 C   0  0  0  0  0  0  0  0  0  0  0  0
    1.7958   -6.5372    0.0000 C   0  0  0  0  0  0  0  0  0  0  0  0
    2.5710   -6.8193    0.0000 C   0  0  0  0  0  0  0  0  0  0  0  0
    3.2030   -6.2890    0.0000 C   0  0  0  0  0  0  0  0  0  0  0  0
    3.0598   -5.4766    0.0000 C   0  0  0  0  0  0  0  0  0  0  0  0
    2.1413   -4.3819    0.0000 C   0  0  0  0  0  0  0  0  0  0  0  0
    1.3660   -4.0998    0.0000 C   0  0  0  0  0  0  0  0  0  0  0  0
    1.2228   -3.2873    0.0000 C   0  0  0  0  0  0  0  0  0  0  0  0
    1.8547   -2.7570    0.0000 C   0  0  0  0  0  0  0  0  0  0  0  0
    2.6300   -3.0392    0.0000 C   0  0  0  0  0  0  0  0  0  0  0  0
    2.7732   -3.8516    0.0000 C   0  0  0  0  0  0  0  0  0  0  0  0
    0.4103   -3.1440    0.0000 C   0  0  0  0  0  0  0  0  0  0  0  0
    0.1281   -2.3688    0.0000 C   0  0  0  0  0  0  0  0  0  0  0  0
   -0.6843   -2.2255    0.0000 C   0  0  0  0  0  0  0  0  0  0  0  0
   -1.2146   -2.8575    0.0000 C   0  0  0  0  0  0  0  0  0  0  0  0
   -0.9325   -3.6328    0.0000 C   0  0  0  0  0  0  0  0  0  0  0  0
   -0.1200   -3.7760    0.0000 C   0  0  0  0  0  0  0  0  0  0  0  0
    6.3463   -4.1958    0.0000 C   0  0  0  0  0  0  0  0  0  0  0  0
    6.8428   -4.8547    0.0000 C   0  0  0  0  0  0  0  0  0  0  0  0
    7.6616   -4.7541    0.0000 C   0  0  0  0  0  0  0  0  0  0  0  0
    7.9840   -3.9947    0.0000 C   0  0  0  0  0  0  0  0  0  0  0  0
    7.4875   -3.3358    0.0000 C   0  0  0  0  0  0  0  0  0  0  0  0
    6.6686   -3.4364    0.0000 C   0  0  0  0  0  0  0  0  0  0  0  0
    5.5274   -4.2963    0.0000 C   0  0  0  0  0  0  0  0  0  0  0  0
    5.2051   -5.0558    0.0000 C   0  0  0  0  0  0  0  0  0  0  0  0
    4.3862   -5.1563    0.0000 C   0  0  0  0  0  0  0  0  0  0  0  0
    3.8897   -4.4974    0.0000 C   0  0  0  0  0  0  0  0  0  0  0  0
    4.2121   -3.7380    0.0000 C   0  0  0  0  0  0  0  0  0  0  0  0
    5.0309   -3.6375    0.0000 C   0  0  0  0  0  0  0  0  0  0  0  0
    4.2006   -5.9602    0.0000 C   0  0  0  0  0  0  0  0  0  0  0  0
    3.4117   -6.2014    0.0000 C   0  0  0  0  0  0  0  0  0  0  0  0
    3.2261   -7.0052    0.0000 C   0  0  0  0  0  0  0  0  0  0  0  0
    3.8295   -7.5679    0.0000 C   0  0  0  0  0  0  0  0  0  0  0  0
    4.6184   -7.3267    0.0000 C   0  0  0  0  0  0  0  0  0  0  0  0
    4.8040   -6.5228    0.0000 C   0  0  0  0  0  0  0  0  0  0  0  0
    5.8170    1.4572    0.0000 C   0  0  0  0  0  0  0  0  0  0  0  0
    6.5764    1.7796    0.0000 C   0  0  0  0  0  0  0  0  0  0  0  0
    6.6769    2.5984    0.0000 C   0  0  0  0  0  0  0  0  0  0  0  0
    6.0181    3.0949    0.0000 C   0  0  0  0  0  0  0  0  0  0  0  0
    5.2586    2.7725    0.0000 C   0  0  0  0  0  0  0  0  0  0  0  0
    5.1581    1.9537    0.0000 C   0  0  0  0  0  0  0  0  0  0  0  0
    5.7164    0.6383    0.0000 C   0  0  0  0  0  0  0  0  0  0  0  0
    6.3753    0.1419    0.0000 C   0  0  0  0  0  0  0  0  0  0  0  0
    6.2748   -0.6770    0.0000 C   0  0  0  0  0  0  0  0  0  0  0  0
    5.5154   -0.9994    0.0000 C   0  0  0  0  0  0  0  0  0  0  0  0
    4.8565   -0.5029    0.0000 C   0  0  0  0  0  0  0  0  0  0  0  0
    4.9570    0.3160    0.0000 C   0  0  0  0  0  0  0  0  0  0  0  0
    6.9336   -1.1735    0.0000 C   0  0  0  0  0  0  0  0  0  0  0  0
    6.8331   -1.9923    0.0000 C   0  0  0  0  0  0  0  0  0  0  0  0
    7.4920   -2.4888    0.0000 C   0  0  0  0  0  0  0  0  0  0  0  0
    8.2514   -2.1665    0.0000 C   0  0  0  0  0  0  0  0  0  0  0  0
    8.3519   -1.3476    0.0000 C   0  0  0  0  0  0  0  0  0  0  0  0
    7.6931   -0.8511    0.0000 C   0  0  0  0  0  0  0  0  0  0  0  0
    1.4966    0.6868    0.0000 C   0  0  0  0  0  0  0  0  0  0  0  0
    1.1274    1.4246    0.0000 C   0  0  0  0  0  0  0  0  0  0  0  0
    0.3038    1.4737    0.0000 C   0  0  0  0  0  0  0  0  0  0  0  0
   -0.1504    0.7850    0.0000 C   0  0  0  0  0  0  0  0  0  0  0  0
    0.2188    0.0473    0.0000 C   0  0  0  0  0  0  0  0  0  0  0  0
    1.0424   -0.0018    0.0000 C   0  0  0  0  0  0  0  0  0  0  0  0
    2.1041    0.7132    0.0000 C   0  0  0  0  0  0  0  0  0  0  0  0
    2.4527    1.4609    0.0000 C   0  0  0  0  0  0  0  0  0  0  0  0
    3.2746    1.5328    0.0000 C   0  0  0  0  0  0  0  0  0  0  0  0
    3.7478    0.8570    0.0000 C   0  0  0  0  0  0  0  0  0  0  0  0
    3.3991    0.1093    0.0000 C   0  0  0  0  0  0  0  0  0  0  0  0
    2.5773    0.0374    0.0000 C   0  0  0  0  0  0  0  0  0  0  0  0
    3.6233    2.2806    0.0000 C   0  0  0  0  0  0  0  0  0  0  0  0
    4.4451    2.3525    0.0000 C   0  0  0  0  0  0  0  0  0  0  0  0
    4.7938    3.1002    0.0000 C   0  0  0  0  0  0  0  0  0  0  0  0
    4.3206    3.7760    0.0000 C   0  0  0  0  0  0  0  0  0  0  0  0
    3.4987    3.7041    0.0000 C   0  0  0  0  0  0  0  0  0  0  0  0
    3.1501    2.9564    0.0000 C   0  0  0  0  0  0  0  0  0  0  0  0
  1  2  2  0      
  3  4  1  0      
  4  5  1  0      
  5  6  1  0      
  6  7  1  0      
  7  8  2  0      
  8  9  1  0      
  9 10  2  0      
 10 11  1  0      
  3 11  1  0      
  6 11  2  0      
 12 13  1  0      
 13 14  2  0      
 14 15  1  0      
 15 16  2  0      
 16 17  1  0      
 12 17  2  0      
 18 19  1  0      
 19 20  2  0      
 20 21  1  0      
 21 22  2  0      
 22 23  1  0      
 18 23  2  0      
 12 18  1  0      
 24 25  1  0      
 25 26  2  0      
 26 27  1  0      
 27 28  2  0      
 28 29  1  0      
 24 29  2  0      
 20 24  1  0      
  5 22  1  0      
 30 31  1  0      
 31 32  2  0      
 32 33  1  0      
 33 34  2  0      
 34 35  1  0      
 30 35  2  0      
 36 37  1  0      
 37 38  2  0      
 38 39  1  0      
 39 40  2  0      
 40 41  1  0      
 36 41  2  0      
 30 36  1  0      
 42 43  1  0      
 43 44  2  0      
 44 45  1  0      
 45 46  2  0      
 46 47  1  0      
 42 47  2  0      
 38 42  1  0      
  5 40  1  0      
 48 49  1  0      
 49 50  2  0      
 50 51  1  0      
 51 52  2  0      
 52 53  1  0      
 48 53  2  0      
 54 55  1  0      
 55 56  2  0      
 56 57  1  0      
 57 58  2  0      
 58 59  1  0      
 54 59  2  0      
 48 54  1  0      
 60 61  1  0      
 61 62  2  0      
 62 63  1  0      
 63 64  2  0      
 64 65  1  0      
 60 65  2  0      
 56 60  1  0      
  3 58  1  0      
 66 67  1  0      
 67 68  2  0      
 68 69  1  0      
 69 70  2  0      
 70 71  1  0      
 66 71  2  0      
 72 73  1  0      
 73 74  2  0      
 74 75  1  0      
 75 76  2  0      
 76 77  1  0      
 72 77  2  0      
 66 72  1  0      
 78 79  1  0      
 79 80  2  0      
 80 81  1  0      
 81 82  2  0      
 82 83  1  0      
 78 83  2  0      
 74 78  1  0      
  3 76  1  0      
  2  4  1  0      
 84 85  1  0      
 85 86  1  0      
 86 87  1  0      
 87 88  1  0      
 88 89  2  0      
 89 90  1  0      
 90 91  2  0      
 91 92  1  0      
 84 92  1  0      
 87 92  2  0      
 93 94  1  0      
 94 95  2  0      
 95 96  1  0      
 96 97  2  0      
 97 98  1  0      
 93 98  2  0      
 99100  1  0      
100101  2  0      
101102  1  0      
102103  2  0      
103104  1  0      
 99104  2  0      
 93 99  1  0      
105106  1  0      
106107  2  0      
107108  1  0      
108109  2  0      
109110  1  0      
105110  2  0      
101105  1  0      
 86103  1  0      
111112  1  0      
112113  2  0      
113114  1  0      
114115  2  0      
115116  1  0      
111116  2  0      
117118  1  0      
118119  2  0      
119120  1  0      
120121  2  0      
121122  1  0      
117122  2  0      
111117  1  0      
123124  1  0      
124125  2  0      
125126  1  0      
126127  2  0      
127128  1  0      
123128  2  0      
119123  1  0      
 86121  1  0      
129130  1  0      
130131  2  0      
131132  1  0      
132133  2  0      
133134  1  0      
129134  2  0      
135136  1  0      
136137  2  0      
137138  1  0      
138139  2  0      
139140  1  0      
135140  2  0      
129135  1  0      
141142  1  0      
142143  2  0      
143144  1  0      
144145  2  0      
145146  1  0      
141146  2  0      
137141  1  0      
 84139  1  0      
147148  1  0      
148149  2  0      
149150  1  0      
150151  2  0      
151152  1  0      
147152  2  0      
153154  1  0      
154155  2  0      
155156  1  0      
156157  2  0      
157158  1  0      
153158  2  0      
147153  1  0      
159160  1  0      
160161  2  0      
161162  1  0      
162163  2  0      
163164  1  0      
159164  2  0      
155159  1  0      
 84157  1  0      
  1 85  1  0      
M  END
