# Supplementary material for: A crystalline monosubstituted carbene
Source: Springer Nature journal article supplement (doi:10.1038/s41557-018-0153-1), 2018-10-05
Supplement: 41557_2018_153_MOESM50_ESM.cif [file 41557_2018_153_MOESM50_ESM.cif]

data_prelim_a_sq
_audit_creation_date               2018-04-09
_audit_creation_method
;
Olex2 1.2-beta
(compiled 2018.04.03 svn.r3497 for OlexSys, GUI svn.r5486)
;
_shelx_SHELXL_version_number       '2016/6'
_audit_contact_author_address      ?
_audit_contact_author_email        ?
_audit_contact_author_name         ''
_audit_contact_author_phone        ?
_publ_contact_author_id_orcid      ?
_publ_section_references
;
Dolomanov, O.V., Bourhis, L.J., Gildea, R.J, Howard, J.A.K. & Puschmann, H.
 (2009), J. Appl. Cryst. 42, 339-341.

Sheldrick, G.M. (2008). Acta Cryst. A64, 112-122.

Sheldrick, G.M. (2015). Acta Cryst. A71, 3-8.
;
_chemical_name_common              ?
_chemical_name_systematic          ?
_chemical_formula_moiety           'C100 H42 Cl4 F48 N O2 Rh'
_chemical_formula_sum              'C100 H42 Cl4 F48 N O2 Rh'
_chemical_formula_weight           2446.05
_chemical_melting_point            ?
loop_
  _atom_type_symbol
  _atom_type_description
  _atom_type_scat_dispersion_real
  _atom_type_scat_dispersion_imag
  _atom_type_scat_source
 'C' 'C' 0.0033 0.0016 'International Tables Vol C Tables 4.2.6.8 and 6.1.1.4'
 'H' 'H' 0.0000 0.0000 'International Tables Vol C Tables 4.2.6.8 and 6.1.1.4'
 'Cl' 'Cl' 0.1484 0.1585 'International Tables Vol C Tables 4.2.6.8 and 6.1.1.4'
 'F' 'F' 0.0171 0.0103 'International Tables Vol C Tables 4.2.6.8 and 6.1.1.4'
 'N' 'N' 0.0061 0.0033 'International Tables Vol C Tables 4.2.6.8 and 6.1.1.4'
 'O' 'O' 0.0106 0.0060 'International Tables Vol C Tables 4.2.6.8 and 6.1.1.4'
 'Rh' 'Rh' -1.1178 0.9187
 'International Tables Vol C Tables 4.2.6.8 and 6.1.1.4'

_shelx_space_group_comment
;
The symmetry employed for this shelxl refinement is uniquely defined
by the following loop, which should always be used as a source of
symmetry information in preference to the above space-group names.
They are only intended as comments.
;
_space_group_crystal_system        'monoclinic'
_space_group_IT_number             14
_space_group_name_H-M_alt          'P 1 21/c 1'
_space_group_name_Hall             '-P 2ybc'
loop_
  _space_group_symop_operation_xyz
 'x, y, z'
 '-x, y+1/2, -z+1/2'
 '-x, -y, -z'
 'x, -y-1/2, z-1/2'

_cell_length_a                     18.5567(16)
_cell_length_b                     23.353(2)
_cell_length_c                     23.8508(18)
_cell_angle_alpha                  90
_cell_angle_beta                   105.989(2)
_cell_angle_gamma                  90
_cell_volume                       9936.0(14)
_cell_formula_units_Z              4
_cell_measurement_reflns_used      9796
_cell_measurement_temperature      100.0
_cell_measurement_theta_max        50.250
_cell_measurement_theta_min        4.723
_shelx_estimated_absorpt_T_max     0.979
_shelx_estimated_absorpt_T_min     0.787
_exptl_absorpt_coefficient_mu      0.420
_exptl_absorpt_correction_T_max    0.4901
_exptl_absorpt_correction_T_min    0.3365
_exptl_absorpt_correction_type     multi-scan
_exptl_absorpt_process_details    
 'SADABS-2016/2 (Bruker,2016/2) was used for absorption correction. wR2(int) was 0.1103 before and 0.0897 after correction. The Ratio of minimum to maximum transmission is 0.6866. The \l/2 correction factor is Not present.'
_exptl_absorpt_special_details     ?
_exptl_crystal_colour              'clear light orange'
_exptl_crystal_colour_lustre       clear
_exptl_crystal_colour_modifier     light
_exptl_crystal_colour_primary      orange
_exptl_crystal_density_diffrn      1.635
_exptl_crystal_density_meas        ?
_exptl_crystal_density_method      ?
_exptl_crystal_description         block
_exptl_crystal_F_000               4840
_exptl_crystal_size_max            0.6
_exptl_crystal_size_mid            0.23
_exptl_crystal_size_min            0.05
_exptl_transmission_factor_max     ?
_exptl_transmission_factor_min     ?
_diffrn_reflns_av_R_equivalents    0.0884
_diffrn_reflns_av_unetI/netI       0.0355
_diffrn_reflns_Laue_measured_fraction_full  1.000
_diffrn_reflns_Laue_measured_fraction_max  0.986
_diffrn_reflns_limit_h_max         22
_diffrn_reflns_limit_h_min         -22
_diffrn_reflns_limit_k_max         28
_diffrn_reflns_limit_k_min         -27
_diffrn_reflns_limit_l_max         28
_diffrn_reflns_limit_l_min         -28
_diffrn_reflns_number              266174
_diffrn_reflns_point_group_measured_fraction_full  1.000
_diffrn_reflns_point_group_measured_fraction_max  0.986
_diffrn_reflns_theta_full          25.242
_diffrn_reflns_theta_max           25.572
_diffrn_reflns_theta_min           1.245
_diffrn_ambient_temperature        100.0
_diffrn_detector                   'Bruker APEX-II CCD'
_diffrn_detector_area_resol_mean   7.9
_diffrn_detector_type              'CCD Area Detector'
_diffrn_measured_fraction_theta_full  1.000
_diffrn_measured_fraction_theta_max  0.986
_diffrn_measurement_device         'Kappa Four-Circle Diffractometer'
_diffrn_measurement_device_type    'Bruker APEX II TXS - Artemis'
_diffrn_measurement_method         '\w and \f scans'
_diffrn_radiation_monochromator    'Double Bounce Multilayer Mirrors'
_diffrn_radiation_probe            X-ray
_diffrn_radiation_type             MoK\a
_diffrn_radiation_wavelength       0.71073
_diffrn_source                     'Micro Focus Rotating Anode'
_diffrn_source_type                'Bruker TXS'
_diffrn_standards_number           0
_reflns_Friedel_coverage           0.000
_reflns_Friedel_fraction_full      .
_reflns_Friedel_fraction_max       .
_reflns_number_gt                  14360
_reflns_number_total               18396
_reflns_special_details
;
 Reflections were merged by SHELXL according to the crystal
 class for the calculation of statistics and refinement.
 
 Structure factors included contributions from the .fab file.
 
 _reflns_Friedel_fraction is defined as the number of unique
 Friedel pairs measured divided by the number that would be
 possible theoretically, ignoring centric projections and
 systematic absences.
;
_reflns_threshold_expression       'I > 2\s(I)'
_computing_cell_refinement         'SAINT v8.34A (Bruker, 2013)'
_computing_data_collection         'APEX2 v2013.6-2 (Bruker, 2013)'
_computing_data_reduction          'SAINT v8.34A (Bruker, 2013)'
_computing_molecular_graphics      'Olex2 (Dolomanov et al., 2009)'
_computing_publication_material    'Olex2 (Dolomanov et al., 2009)'
_computing_structure_refinement    'XL (Sheldrick, 2008)'
_computing_structure_solution      'ShelXT (Sheldrick, 2015)'
_refine_diff_density_max           1.875
_refine_diff_density_min           -1.675
_refine_diff_density_rms           0.127
_refine_ls_extinction_coef         .
_refine_ls_extinction_method       none
_refine_ls_goodness_of_fit_ref     1.041
_refine_ls_hydrogen_treatment      constr
_refine_ls_matrix_type             full
_refine_ls_number_parameters       1459
_refine_ls_number_reflns           18396
_refine_ls_number_restraints       117
_refine_ls_R_factor_all            0.0913
_refine_ls_R_factor_gt             0.0712
_refine_ls_restrained_S_all        1.043
_refine_ls_shift/su_max            0.001
_refine_ls_shift/su_mean           0.000
_refine_ls_structure_factor_coef   Fsqd
_refine_ls_weighting_details      
 'w=1/[\s^2^(Fo^2^)+(0.1132P)^2^+40.3611P] where P=(Fo^2^+2Fc^2^)/3'
_refine_ls_weighting_scheme        calc
_refine_ls_wR_factor_gt            0.1899
_refine_ls_wR_factor_ref           0.2121
_refine_special_details            ?
_olex2_refinement_description
;
1. Fixed Uiso
 At 1.2 times of:
  All C(H) groups, All C(H,H) groups
2. Restrained distances
 Cl3-C04F \\sim Cl4-C04F \\sim Cl2-C04F
 with sigma of 0.01
3. Uiso/Uaniso restraints and constraints
Uanis(Rh1A) = Uanis(Rh1)
Uanis(C99) = Uanis(C99B)
4. Rigid body (RIGU) restrains
 F35, H95, F36A, C99B, F34A, F36, C99, F34, C96
 with sigma for 1-2 distances of 0.002 and sigma for 1-3 distances of 0.002
 F47, C68, F48, F46, C64
 with sigma for 1-2 distances of 0.004 and sigma for 1-3 distances of 0.004
 F46A, C68, F47A, F48A, C64
 with sigma for 1-2 distances of 0.004 and sigma for 1-3 distances of 0.004
5. Others
 Sof(H3B)=Sof(Rh1A)=1-FVAR(1)
 Sof(Rh1)=Sof(H3A)=FVAR(1)
 Sof(F48)=Sof(F47)=Sof(F46)=1-FVAR(2)
 Sof(F46A)=Sof(F47A)=Sof(F48A)=FVAR(2)
 Sof(F36)=Sof(C99)=Sof(F34)=1-FVAR(3)
 Sof(F36A)=Sof(C99B)=Sof(F34A)=FVAR(3)
6.a Ternary CH refined with riding coordinates:
 C04F(H04F)
6.b Aromatic/amide H refined with riding coordinates:
 C59(H59), C3(H3A), C3(H3B), C17(H17), C13(H13), C8(H8), C9(H9), C41(H41),
 C75(H75), C93(H93), C79(H79), C39(H39), C57(H57), C35(H35), C81(H81), C6(H6),
 C61(H61), C37(H37), C89(H89), C73(H73), C63(H63), C15(H15), C83(H83), C7(H7),
 C49(H49), C45(H45), C19(H19), C53(H53), C71(H71), C23(H23), C67(H67), C97(H97),
  C27(H27), C31(H31), C87(H87), C65(H65), C85(H85), C21(H21), C95(H95),
 C51(H51), C43(H43), C29(H29)
;
_atom_sites_solution_hydrogens     geom
_atom_sites_solution_primary       dual
_atom_sites_solution_secondary     ?
loop_
  _atom_site_label
  _atom_site_type_symbol
  _atom_site_fract_x
  _atom_site_fract_y
  _atom_site_fract_z
  _atom_site_U_iso_or_equiv
  _atom_site_adp_type
  _atom_site_occupancy
  _atom_site_site_symmetry_order
  _atom_site_calc_flag
  _atom_site_refinement_flags_posn
  _atom_site_refinement_flags_adp
  _atom_site_refinement_flags_occupancy
  _atom_site_disorder_assembly
  _atom_site_disorder_group
 Rh1 Rh 0.62044(2) 0.20196(2) 0.28853(2) 0.02289(12) Uani 0.9517(9) 1 d . . P A 1
 Cl1 Cl 0.70753(7) 0.27001(6) 0.27460(5) 0.0402(3) Uani 1 1 d . . . . .
 F2 F 0.65812(16) 0.57492(12) 0.49026(13) 0.0359(7) Uani 1 1 d . . . . .
 F42 F 0.56002(16) -0.16302(12) 0.43635(15) 0.0405(7) Uani 1 1 d . . . . .
 F3 F 0.74453(15) 0.52902(12) 0.55144(14) 0.0386(7) Uani 1 1 d . . . . .
 F38 F 0.37757(16) 0.09453(12) 0.45967(14) 0.0383(7) Uani 1 1 d . . . . .
 F40 F 0.46607(19) -0.15925(13) 0.47231(15) 0.0472(8) Uani 1 1 d . . . . .
 F41 F 0.44821(18) -0.16640(12) 0.37983(14) 0.0442(8) Uani 1 1 d . . . . .
 F32 F 1.09935(17) 0.45038(13) 0.40480(15) 0.0464(8) Uani 1 1 d . . . . .
 F39 F 0.32626(17) 0.01444(14) 0.46973(16) 0.0468(8) Uani 1 1 d . . . . .
 F26 F 1.18757(17) 0.07420(14) 0.46308(15) 0.0443(8) Uani 1 1 d . . . . .
 F19 F 1.02155(19) 0.47425(13) 0.69592(14) 0.0467(8) Uani 1 1 d . . . . .
 F1 F 0.69297(18) 0.60245(12) 0.57962(14) 0.0428(7) Uani 1 1 d . . . . .
 F15 F 0.7443(2) 0.64147(12) 0.33591(15) 0.0462(8) Uani 1 1 d . . . . .
 Cl2 Cl 0.47386(18) 0.32078(14) 0.30672(17) 0.1274(12) Uani 1 1 d D . . . .
 F20 F 1.07936(19) 0.49565(13) 0.63314(16) 0.0503(9) Uani 1 1 d . . . . .
 F14 F 0.6672(2) 0.62451(13) 0.38588(16) 0.0546(9) Uani 1 1 d . . . . .
 F33 F 1.15025(17) 0.37423(14) 0.44691(17) 0.0548(10) Uani 1 1 d . . . . .
 N1 N 0.68161(18) 0.22673(14) 0.42175(14) 0.0146(7) Uani 1 1 d . . . . .
 F25 F 1.24503(17) 0.06002(18) 0.55266(17) 0.0575(10) Uani 1 1 d . . . . .
 F37 F 0.30916(18) 0.05224(18) 0.38474(15) 0.0568(10) Uani 1 1 d . . . . .
 F21 F 1.1345(2) 0.44548(15) 0.70756(18) 0.0645(11) Uani 1 1 d . . . . .
 F44 F 0.8114(3) -0.13317(15) 0.28021(16) 0.0721(13) Uani 1 1 d . . . . .
 F24 F 1.1488(2) 0.24574(14) 0.67104(19) 0.0688(12) Uani 1 1 d . . . . .
 F12 F 0.3439(2) 0.14586(18) 0.29914(18) 0.0683(12) Uani 1 1 d . . . . .
 F16 F 0.5909(2) 0.48927(19) 0.20577(14) 0.0649(11) Uani 1 1 d . . . . .
 F23 F 1.0436(2) 0.20269(13) 0.64136(19) 0.0592(10) Uani 1 1 d . . . . .
 F43 F 0.7184(3) -0.13614(13) 0.20266(18) 0.0652(11) Uani 1 1 d . . . . .
 F45 F 0.8292(3) -0.11969(15) 0.19628(18) 0.0665(12) Uani 1 1 d . . . . .
 F30 F 0.9536(2) 0.00239(19) 0.6382(2) 0.0732(13) Uani 1 1 d . . . . .
 Cl4 Cl 0.4003(4) 0.36508(14) 0.19190(18) 0.205(3) Uani 1 1 d D . . . .
 F10 F 0.2302(2) 0.1463(2) 0.2988(2) 0.0784(14) Uani 1 1 d . . . . .
 F31 F 1.0763(2) 0.42162(19) 0.48286(17) 0.0720(13) Uani 1 1 d . . . . .
 F22 F 1.1035(2) 0.22438(17) 0.58094(18) 0.0659(11) Uani 1 1 d . . . . .
 F27 F 1.1876(2) -0.00898(14) 0.5003(3) 0.0850(17) Uani 1 1 d . . . . .
 Cl3 Cl 0.4124(2) 0.24469(15) 0.2056(2) 0.1682(19) Uani 1 1 d D . . . .
 F13 F 0.7856(3) 0.61910(13) 0.42621(16) 0.0723(13) Uani 1 1 d . . . . .
 F8 F 0.2412(2) 0.27263(17) 0.5303(2) 0.0815(16) Uani 1 1 d . . . . .
 C59 C 0.6384(2) 0.02211(18) 0.34701(18) 0.0206(9) Uani 1 1 d . . . . .
 H59 H 0.618962 -0.012039 0.326804 0.025 Uiso 1 1 calc R . . . .
 F35 F 0.8117(2) 0.3741(2) 0.24133(16) 0.0666(10) Uani 1 1 d . U . . .
 C60 C 0.6084(2) 0.04253(17) 0.39074(18) 0.0191(8) Uani 1 1 d . . . . .
 C16 C 0.5487(2) 0.37029(18) 0.51031(18) 0.0196(8) Uani 1 1 d . . . . .
 F11 F 0.2750(3) 0.2183(2) 0.26784(18) 0.0911(16) Uani 1 1 d . . . . .
 C3 C 0.6419(2) 0.23680(17) 0.36966(18) 0.0183(8) Uani 1 1 d . . . . .
 H3A H 0.613903 0.271039 0.368511 0.022 Uiso 0.9517(9) 1 calc R . P A 1
 H3B H 0.626463 0.201737 0.349794 0.022 Uiso 0.0483(9) 1 calc R . P A 2
 C5 C 0.7074(2) 0.22473(17) 0.52405(17) 0.0159(8) Uani 1 1 d . . . . .
 F6 F 0.4722(3) 0.4579(2) 0.6800(2) 0.0858(15) Uani 1 1 d . . . . .
 C17 C 0.6128(2) 0.34575(17) 0.50093(18) 0.0186(8) Uani 1 1 d . . . . .
 H17 H 0.659294 0.365305 0.514138 0.022 Uiso 1 1 calc R . . . .
 C4 C 0.6861(2) 0.26674(17) 0.47377(17) 0.0157(8) Uani 1 1 d . . . . .
 O2 O 0.4977(2) 0.1268(2) 0.30334(19) 0.0541(11) Uani 1 1 d . . . . .
 F5 F 0.5416(3) 0.5298(2) 0.70466(18) 0.0802(14) Uani 1 1 d . . . . .
 C13 C 0.5425(2) 0.26477(17) 0.45348(17) 0.0179(8) Uani 1 1 d . . . . .
 H13 H 0.540265 0.229097 0.433931 0.022 Uiso 1 1 calc R . . . .
 C8 C 0.7428(2) 0.13562(18) 0.60259(18) 0.0204(9) Uani 1 1 d . . . . .
 H8 H 0.755216 0.105136 0.629938 0.025 Uiso 1 1 calc R . . . .
 C9 C 0.7443(2) 0.12655(17) 0.54534(18) 0.0181(8) Uani 1 1 d . . . . .
 H9 H 0.756530 0.089953 0.533153 0.022 Uiso 1 1 calc R . . . .
 C10 C 0.7277(2) 0.17207(16) 0.50612(17) 0.0153(8) Uani 1 1 d . . . . .
 C80 C 0.9411(2) 0.15320(17) 0.47942(18) 0.0198(8) Uani 1 1 d . . . . .
 C40 C 0.9399(2) 0.35476(17) 0.56148(18) 0.0196(8) Uani 1 1 d . . . . .
 F29 F 1.0439(3) 0.0485(3) 0.6920(2) 0.0927(17) Uani 1 1 d . . . . .
 C62 C 0.7273(2) 0.03052(18) 0.28515(18) 0.0188(8) Uani 1 1 d . . . . .
 C70 C 0.5458(2) 0.01160(18) 0.40536(18) 0.0195(8) Uani 1 1 d . . . . .
 F46A F 0.7857(7) 0.1473(3) 0.1757(4) 0.059(3) Uani 0.66(2) 1 d . U P B 1
 C41 C 0.9723(2) 0.40367(19) 0.5915(2) 0.0243(9) Uani 1 1 d . . . . .
 H41 H 0.948207 0.439704 0.582145 0.029 Uiso 1 1 calc R . . . .
 C75 C 0.4853(2) 0.04071(19) 0.41501(18) 0.0208(9) Uani 1 1 d . . . . .
 H75 H 0.483591 0.081298 0.412359 0.025 Uiso 1 1 calc R . . . .
 C84 C 0.9970(2) 0.11157(17) 0.5131(2) 0.0221(9) Uani 1 1 d . . . . .
 C93 C 0.9981(2) 0.32210(18) 0.42431(19) 0.0206(9) Uani 1 1 d . . . . .
 H93 H 1.023763 0.311861 0.463236 0.025 Uiso 1 1 calc R . . . .
 C79 C 0.8654(2) 0.14579(17) 0.47360(18) 0.0179(8) Uani 1 1 d . . . . .
 H79 H 0.849398 0.113596 0.491402 0.021 Uiso 1 1 calc R . . . .
 C58 C 0.6962(2) 0.05098(17) 0.33257(17) 0.0179(8) Uani 1 1 d . . . . .
 C92 C 0.9365(2) 0.29011(17) 0.39343(18) 0.0189(8) Uani 1 1 d . . . . .
 C39 C 0.8140(2) 0.31334(17) 0.51645(17) 0.0174(8) Uani 1 1 d . . . . .
 H39 H 0.825531 0.284061 0.545190 0.021 Uiso 1 1 calc R . . . .
 F28 F 1.0651(2) -0.0322(2) 0.6597(2) 0.099(2) Uani 1 1 d . . . . .
 C26 C 0.4040(2) 0.25809(18) 0.4423(2) 0.0236(9) Uani 1 1 d . . . . .
 C14 C 0.4774(2) 0.28818(18) 0.46274(18) 0.0204(9) Uani 1 1 d . . . . .
 O1 O 0.5856(3) 0.1753(2) 0.15884(18) 0.0636(13) Uani 1 1 d . . . . .
 C38 C 0.8665(2) 0.35666(17) 0.51706(18) 0.0175(8) Uani 1 1 d . . . . .
 C57 C 0.7253(2) 0.10063(17) 0.36364(17) 0.0177(8) Uani 1 1 d . . . . .
 H57 H 0.764987 0.120654 0.354252 0.021 Uiso 1 1 calc R . . . .
 C56 C 0.6968(2) 0.12101(16) 0.40805(17) 0.0157(8) Uani 1 1 d . . . . .
 C34 C 0.7455(2) 0.31270(16) 0.47455(17) 0.0153(8) Uani 1 1 d . . . . .
 C12 C 0.6105(2) 0.29353(17) 0.47281(17) 0.0170(8) Uani 1 1 d . . . . .
 C18 C 0.5567(2) 0.42680(18) 0.53980(19) 0.0212(9) Uani 1 1 d . . . . .
 C35 C 0.7287(2) 0.35608(17) 0.43279(17) 0.0171(8) Uani 1 1 d . . . . .
 H35 H 0.682034 0.355490 0.403617 0.021 Uiso 1 1 calc R . . . .
 C81 C 0.9642(2) 0.20117(17) 0.45325(18) 0.0185(8) Uani 1 1 d . . . . .
 H81 H 1.016082 0.207702 0.457994 0.022 Uiso 1 1 calc R . . . .
 C6 C 0.7051(2) 0.23377(17) 0.58099(18) 0.0191(8) Uani 1 1 d . . . . .
 H6 H 0.691414 0.270075 0.592783 0.023 Uiso 1 1 calc R . . . .
 C78 C 0.8119(2) 0.18436(17) 0.44229(17) 0.0159(8) Uani 1 1 d . . . . .
 C36 C 0.7793(2) 0.40029(17) 0.43316(17) 0.0183(8) Uani 1 1 d . . . . .
 F4 F 0.4397(3) 0.5383(3) 0.6383(2) 0.0966(18) Uani 1 1 d . . . . .
 C82 C 0.9113(2) 0.23925(17) 0.42033(17) 0.0179(8) Uani 1 1 d . . . . .
 C61 C 0.6372(2) 0.09239(17) 0.42048(18) 0.0170(8) Uani 1 1 d . . . . .
 H61 H 0.616079 0.107038 0.449560 0.020 Uiso 1 1 calc R . . . .
 C48 C 0.7548(2) 0.44633(18) 0.38849(19) 0.0209(9) Uani 1 1 d . . . . .
 C11 C 0.7300(2) 0.17366(16) 0.44292(17) 0.0151(8) Uani 1 1 d . . . . .
 C37 C 0.8480(2) 0.40061(17) 0.47555(18) 0.0195(8) Uani 1 1 d . . . . .
 H37 H 0.882536 0.430823 0.476343 0.023 Uiso 1 1 calc R . . . .
 C89 C 1.0616(2) 0.09910(17) 0.4968(2) 0.0240(9) Uani 1 1 d . . . . .
 H89 H 1.070082 0.117490 0.463644 0.029 Uiso 1 1 calc R . . . .
 C73 C 0.4293(2) -0.04820(19) 0.43264(18) 0.0240(9) Uani 1 1 d . . . . .
 H73 H 0.389679 -0.068586 0.441809 0.029 Uiso 1 1 calc R . . . .
 C63 C 0.7453(2) 0.06963(18) 0.24677(18) 0.0209(9) Uani 1 1 d . . . . .
 H63 H 0.737311 0.109386 0.251048 0.025 Uiso 1 1 calc R . . . .
 C15 C 0.4811(2) 0.34060(17) 0.49166(19) 0.0206(9) Uani 1 1 d . . . . .
 H15 H 0.437093 0.356169 0.498687 0.025 Uiso 1 1 calc R . . . .
 C74 C 0.4273(2) 0.01143(19) 0.42847(18) 0.0216(9) Uani 1 1 d . . . . .
 C83 C 0.8351(2) 0.23004(17) 0.41411(17) 0.0158(8) Uani 1 1 d . . . . .
 H83 H 0.798934 0.255114 0.390499 0.019 Uiso 1 1 calc R . . . .
 C7 C 0.7233(2) 0.18892(19) 0.62039(18) 0.0211(9) Uani 1 1 d . . . . .
 H7 H 0.722450 0.194488 0.659658 0.025 Uiso 1 1 calc R . . . .
 C49 C 0.7191(3) 0.43110(19) 0.33080(19) 0.0247(9) Uani 1 1 d . . . . .
 H49 H 0.715625 0.391906 0.319723 0.030 Uiso 1 1 calc R . . . .
 C45 C 0.9781(2) 0.30279(18) 0.57514(19) 0.0217(9) Uani 1 1 d . . . . .
 H45 H 0.957140 0.268908 0.555185 0.026 Uiso 1 1 calc R . . . .
 C22 C 0.6220(2) 0.51755(18) 0.5591(2) 0.0241(9) Uani 1 1 d . . . . .
 C25 C 0.6794(3) 0.5563(2) 0.5455(2) 0.0301(10) Uani 1 1 d . . . . .
 C19 C 0.5202(3) 0.4403(2) 0.5816(2) 0.0258(9) Uani 1 1 d . . . . .
 H19 H 0.484815 0.414333 0.589483 0.031 Uiso 1 1 calc R . . . .
 C53 C 0.7614(3) 0.50395(19) 0.40381(19) 0.0250(9) Uani 1 1 d . . . . .
 H53 H 0.786015 0.515031 0.442703 0.030 Uiso 1 1 calc R . . . .
 C71 C 0.5474(2) -0.04809(19) 0.40944(19) 0.0224(9) Uani 1 1 d . . . . .
 H71 H 0.588342 -0.068819 0.402741 0.027 Uiso 1 1 calc R . . . .
 C20 C 0.5350(3) 0.4915(2) 0.6120(2) 0.0316(11) Uani 1 1 d . . . . .
 C23 C 0.6066(2) 0.46652(18) 0.5281(2) 0.0235(9) Uani 1 1 d . . . . .
 H23 H 0.630530 0.458620 0.498480 0.028 Uiso 1 1 calc R . . . .
 C64 C 0.7746(2) 0.05098(19) 0.20271(19) 0.0246(9) Uani 1 1 d . U . . .
 C67 C 0.7398(3) -0.02771(18) 0.27830(19) 0.0233(9) Uani 1 1 d . . . . .
 H67 H 0.727529 -0.054927 0.303837 0.028 Uiso 1 1 calc R . . . .
 C94 C 1.0220(2) 0.36924(18) 0.3981(2) 0.0240(9) Uani 1 1 d . . . . .
 C97 C 0.8995(3) 0.3064(2) 0.3365(2) 0.0274(10) Uani 1 1 d . . . . .
 H97 H 0.856689 0.285660 0.315093 0.033 Uiso 1 1 calc R . . . .
 F17 F 0.6904(3) 0.4588(3) 0.19315(17) 0.109(2) Uani 1 1 d . . . . .
 C42 C 1.0395(3) 0.40007(19) 0.6350(2) 0.0277(10) Uani 1 1 d . . . . .
 C88 C 1.1137(3) 0.06030(19) 0.5280(2) 0.0286(10) Uani 1 1 d . . . . .
 C27 C 0.3830(3) 0.2308(2) 0.3882(2) 0.0281(10) Uani 1 1 d . . . . .
 H27 H 0.416548 0.229944 0.364490 0.034 Uiso 1 1 calc R . . . .
 C31 C 0.3539(3) 0.25807(19) 0.4765(2) 0.0286(10) Uani 1 1 d . . . . .
 H31 H 0.367244 0.276573 0.513357 0.034 Uiso 1 1 calc R . . . .
 C87 C 1.1021(3) 0.0322(2) 0.5761(2) 0.0343(11) Uani 1 1 d . . . . .
 H87 H 1.137696 0.005206 0.597198 0.041 Uiso 1 1 calc R . . . .
 C65 C 0.7880(3) -0.0073(2) 0.1963(2) 0.0278(10) Uani 1 1 d . . . . .
 H65 H 0.809059 -0.020057 0.166437 0.033 Uiso 1 1 calc R . . . .
 C85 C 0.9859(2) 0.0841(2) 0.5619(2) 0.0273(10) Uani 1 1 d . . . . .
 H85 H 0.942738 0.092604 0.574459 0.033 Uiso 1 1 calc R . . . .
 C72 C 0.4898(2) -0.07695(19) 0.42318(19) 0.0232(9) Uani 1 1 d . . . . .
 C76 C 0.3598(3) 0.0433(2) 0.4348(2) 0.0290(10) Uani 1 1 d . . . . .
 F9 F 0.2405(4) 0.18301(18) 0.5261(3) 0.105(2) Uani 1 1 d . . . . .
 C52 C 0.7314(3) 0.54559(19) 0.3614(2) 0.0290(10) Uani 1 1 d . . . . .
 C77 C 0.4918(3) -0.1416(2) 0.4279(2) 0.0323(11) Uani 1 1 d . . . . .
 C30 C 0.2847(3) 0.2312(2) 0.4569(3) 0.0343(11) Uani 1 1 d . . . . .
 C21 C 0.5866(3) 0.5301(2) 0.6013(2) 0.0296(10) Uani 1 1 d . . . . .
 H21 H 0.597294 0.564814 0.622810 0.036 Uiso 1 1 calc R . . . .
 C44 C 1.0461(3) 0.30016(19) 0.6173(2) 0.0279(10) Uani 1 1 d . . . . .
 C98 C 1.0867(3) 0.4036(2) 0.4333(2) 0.0334(11) Uani 1 1 d . . . . .
 C96 C 0.9252(3) 0.3530(2) 0.3110(2) 0.0328(11) Uani 1 1 d . U . . .
 C91 C 1.1835(3) 0.0472(2) 0.5107(3) 0.0353(12) Uani 1 1 d . . . . .
 C95 C 0.9862(3) 0.3845(2) 0.3416(2) 0.0297(10) Uani 1 1 d . . . . .
 H95 H 1.003195 0.416338 0.323867 0.036 Uiso 1 1 calc R U . . .
 C68 C 0.7918(3) 0.0929(2) 0.1613(2) 0.0322(10) Uani 1 1 d . U . . .
 C50 C 0.6891(3) 0.4725(2) 0.2900(2) 0.0326(11) Uani 1 1 d . . . . .
 C66 C 0.7700(3) -0.0458(2) 0.2342(2) 0.0294(10) Uani 1 1 d . . . . .
 C69 C 0.7831(4) -0.1091(2) 0.2284(3) 0.0473(15) Uani 1 1 d . . . . .
 F36A F 0.8776(7) 0.3152(6) 0.2127(4) 0.059(3) Uani 0.51(2) 1 d . U P C 1
 F18 F 0.6233(5) 0.4035(2) 0.2251(2) 0.169(4) Uani 1 1 d . . . . .
 F7 F 0.1622(2) 0.2275(3) 0.4644(3) 0.123(2) Uani 1 1 d . . . . .
 C54 C 0.7323(3) 0.6079(2) 0.3781(2) 0.0389(12) Uani 1 1 d . . . . .
 C28 C 0.3130(3) 0.2048(2) 0.3688(2) 0.0340(11) Uani 1 1 d . . . . .
 C47 C 1.0692(3) 0.4535(2) 0.6680(3) 0.0394(12) Uani 1 1 d . . . . .
 C51 C 0.6953(3) 0.5303(2) 0.3050(2) 0.0335(11) Uani 1 1 d . . . . .
 H51 H 0.674777 0.558759 0.276635 0.040 Uiso 1 1 calc R . . . .
 C46 C 1.0868(3) 0.2438(2) 0.6288(3) 0.0393(13) Uani 1 1 d . . . . .
 C43 C 1.0777(3) 0.3490(2) 0.6485(2) 0.0320(11) Uani 1 1 d . . . . .
 H43 H 1.124029 0.347091 0.678037 0.038 Uiso 1 1 calc R . . . .
 C86 C 1.0383(3) 0.0439(2) 0.5926(2) 0.0374(12) Uani 1 1 d . . . . .
 C55 C 0.6478(4) 0.4561(2) 0.2293(2) 0.0502(16) Uani 1 1 d . . . . .
 C29 C 0.2643(3) 0.2048(2) 0.4024(3) 0.0388(13) Uani 1 1 d . . . . .
 H29 H 0.216655 0.186948 0.388674 0.047 Uiso 1 1 calc R . . . .
 C32 C 0.2913(3) 0.1790(3) 0.3090(3) 0.0483(15) Uani 1 1 d . . . . .
 C1 C 0.5983(3) 0.1835(3) 0.2074(2) 0.0425(13) Uani 1 1 d . . . . .
 C33 C 0.2331(3) 0.2297(2) 0.4952(3) 0.0491(16) Uani 1 1 d . . . . .
 C2 C 0.5459(3) 0.1547(2) 0.2984(2) 0.0378(12) Uani 1 1 d . . . . .
 C24 C 0.4965(4) 0.5045(3) 0.6591(3) 0.0514(16) Uani 1 1 d . . . . .
 F47A F 0.7516(10) 0.0869(5) 0.1086(3) 0.105(7) Uani 0.66(2) 1 d . U P B 1
 C90 C 1.0244(3) 0.0155(3) 0.6453(3) 0.0566(19) Uani 1 1 d . . . . .
 C99B C 0.8898(10) 0.3637(8) 0.2511(8) 0.0405(16) Uani 0.51(2) 1 d . U P C 1
 F34A F 0.9258(8) 0.3980(9) 0.2237(5) 0.102(6) Uani 0.51(2) 1 d . U P C 1
 F48A F 0.8629(5) 0.0894(5) 0.1602(6) 0.089(5) Uani 0.66(2) 1 d . U P B 1
 C04F C 0.4550(6) 0.3097(3) 0.2318(3) 0.104(3) Uani 1 1 d D . . . .
 H04F H 0.504277 0.310658 0.222376 0.124 Uiso 1 1 calc R . . . .
 Rh1A Rh 0.6004(4) 0.3054(3) 0.3145(3) 0.02289(12) Uani 0.0483(9) 1 d . . P A 2
 F48 F 0.8146(19) 0.0706(6) 0.1203(10) 0.088(10) Uani 0.34(2) 1 d . U P B 2
 F47 F 0.7282(9) 0.1199(12) 0.1322(10) 0.090(10) Uani 0.34(2) 1 d . U P B 2
 F46 F 0.8318(16) 0.1325(10) 0.1836(7) 0.083(10) Uani 0.34(2) 1 d . U P B 2
 F36 F 0.8994(8) 0.3431(7) 0.2128(5) 0.064(3) Uani 0.49(2) 1 d . U P C 2
 C99 C 0.8770(12) 0.3763(8) 0.2483(8) 0.0405(16) Uani 0.49(2) 1 d . U P C 2
 F34 F 0.8899(9) 0.4278(4) 0.2412(5) 0.081(4) Uani 0.49(2) 1 d . U P C 2

loop_
  _atom_site_aniso_label
  _atom_site_aniso_U_11
  _atom_site_aniso_U_22
  _atom_site_aniso_U_33
  _atom_site_aniso_U_23
  _atom_site_aniso_U_13
  _atom_site_aniso_U_12
 Rh1 0.0275(2) 0.0209(2) 0.0190(2) -0.00253(14) 0.00438(15) 0.00222(14)
 Cl1 0.0385(7) 0.0570(8) 0.0248(6) 0.0084(5) 0.0080(5) -0.0142(6)
 F2 0.0395(16) 0.0259(15) 0.0449(17) 0.0079(12) 0.0161(13) 0.0043(12)
 F42 0.0366(16) 0.0192(14) 0.066(2) 0.0073(13) 0.0139(15) 0.0008(12)
 F3 0.0255(14) 0.0237(15) 0.067(2) 0.0047(14) 0.0125(14) 0.0016(11)
 F38 0.0381(16) 0.0277(15) 0.0532(18) -0.0033(13) 0.0195(14) 0.0060(12)
 F40 0.064(2) 0.0284(16) 0.061(2) 0.0159(14) 0.0362(17) -0.0030(15)
 F41 0.0502(19) 0.0204(15) 0.056(2) -0.0053(13) 0.0055(15) -0.0106(13)
 F32 0.0421(17) 0.0252(15) 0.064(2) 0.0125(14) 0.0012(15) -0.0180(13)
 F39 0.0391(17) 0.0405(18) 0.075(2) 0.0045(16) 0.0390(17) 0.0000(14)
 F26 0.0368(16) 0.0435(18) 0.060(2) 0.0071(15) 0.0263(15) 0.0152(14)
 F19 0.054(2) 0.0296(16) 0.0523(19) -0.0141(14) 0.0078(16) -0.0062(14)
 F1 0.0554(19) 0.0192(14) 0.0560(19) -0.0104(13) 0.0191(16) -0.0144(13)
 F15 0.067(2) 0.0186(14) 0.0555(19) 0.0162(13) 0.0219(17) -0.0032(14)
 Cl2 0.118(2) 0.108(2) 0.165(3) 0.065(2) 0.053(2) 0.0347(18)
 F20 0.0508(19) 0.0219(15) 0.077(2) -0.0071(15) 0.0158(17) -0.0162(14)
 F14 0.084(3) 0.0199(15) 0.072(2) 0.0017(15) 0.043(2) 0.0062(16)
 F33 0.0302(16) 0.0380(18) 0.080(2) 0.0155(17) -0.0125(16) -0.0110(14)
 N1 0.0173(16) 0.0095(16) 0.0182(17) -0.0011(13) 0.0072(13) -0.0012(13)
 F25 0.0222(16) 0.078(3) 0.072(2) 0.016(2) 0.0129(16) 0.0076(16)
 F37 0.0335(17) 0.082(3) 0.0462(19) -0.0074(18) -0.0034(15) 0.0205(17)
 F21 0.0449(19) 0.0343(18) 0.088(3) -0.0181(18) -0.0257(19) 0.0004(15)
 F44 0.135(4) 0.0322(19) 0.053(2) 0.0149(16) 0.034(2) 0.043(2)
 F24 0.052(2) 0.0266(17) 0.096(3) 0.0020(18) -0.033(2) 0.0111(15)
 F12 0.050(2) 0.076(3) 0.069(2) -0.044(2) -0.0010(18) 0.0111(19)
 F16 0.070(2) 0.082(3) 0.0302(17) -0.0056(17) -0.0079(16) 0.035(2)
 F23 0.055(2) 0.0208(16) 0.093(3) 0.0135(17) 0.007(2) 0.0037(14)
 F43 0.109(3) 0.0176(16) 0.079(3) -0.0114(16) 0.043(2) -0.0059(18)
 F45 0.108(3) 0.0340(19) 0.080(3) 0.0025(17) 0.062(2) 0.029(2)
 F30 0.0397(19) 0.088(3) 0.097(3) 0.066(3) 0.027(2) 0.0089(19)
 Cl4 0.445(8) 0.0745(19) 0.145(3) 0.0386(19) 0.167(4) 0.085(3)
 F10 0.048(2) 0.086(3) 0.088(3) -0.049(3) -0.004(2) -0.018(2)
 F31 0.082(3) 0.083(3) 0.056(2) -0.033(2) 0.027(2) -0.055(2)
 F22 0.070(3) 0.050(2) 0.077(3) -0.0044(19) 0.019(2) 0.031(2)
 F27 0.071(3) 0.0137(16) 0.201(5) -0.007(2) 0.089(3) 0.0056(16)
 Cl3 0.121(3) 0.090(2) 0.253(5) 0.049(3) -0.017(3) -0.0095(19)
 F13 0.121(3) 0.0154(16) 0.051(2) 0.0003(14) -0.025(2) -0.0010(18)
 F8 0.083(3) 0.053(2) 0.143(4) -0.055(3) 0.089(3) -0.037(2)
 C59 0.023(2) 0.016(2) 0.022(2) -0.0012(16) 0.0039(17) -0.0020(16)
 F35 0.058(2) 0.091(3) 0.0426(19) 0.0117(19) 0.0020(16) 0.0240(19)
 C60 0.020(2) 0.014(2) 0.024(2) 0.0004(16) 0.0065(17) -0.0019(16)
 C16 0.023(2) 0.016(2) 0.022(2) 0.0020(16) 0.0086(17) 0.0005(16)
 F11 0.141(5) 0.060(3) 0.048(2) -0.010(2) -0.016(3) 0.005(3)
 C3 0.019(2) 0.0134(19) 0.023(2) 0.0006(16) 0.0063(17) 0.0008(16)
 C5 0.0133(18) 0.0129(19) 0.021(2) 0.0004(16) 0.0039(15) -0.0015(15)
 F6 0.123(4) 0.072(3) 0.093(3) -0.026(2) 0.083(3) -0.022(3)
 C17 0.018(2) 0.014(2) 0.024(2) 0.0007(16) 0.0075(17) 0.0001(16)
 C4 0.0175(19) 0.0125(19) 0.0178(19) -0.0020(15) 0.0061(16) -0.0001(15)
 O2 0.043(2) 0.055(3) 0.055(3) 0.019(2) -0.0025(19) -0.010(2)
 F5 0.085(3) 0.110(4) 0.052(2) -0.033(2) 0.030(2) -0.008(3)
 C13 0.022(2) 0.0118(19) 0.020(2) 0.0013(15) 0.0063(16) 0.0005(16)
 C8 0.024(2) 0.015(2) 0.022(2) 0.0039(16) 0.0069(17) -0.0028(16)
 C9 0.018(2) 0.014(2) 0.022(2) 0.0030(16) 0.0055(16) 0.0003(15)
 C10 0.0136(18) 0.0115(19) 0.022(2) -0.0022(15) 0.0069(15) -0.0028(15)
 C80 0.022(2) 0.015(2) 0.025(2) 0.0022(16) 0.0114(17) 0.0026(16)
 C40 0.022(2) 0.013(2) 0.025(2) 0.0026(16) 0.0101(17) -0.0001(16)
 F29 0.086(3) 0.143(5) 0.051(3) 0.036(3) 0.022(2) -0.008(3)
 C62 0.021(2) 0.016(2) 0.021(2) -0.0016(16) 0.0088(17) 0.0004(16)
 C70 0.022(2) 0.019(2) 0.018(2) -0.0019(16) 0.0078(17) -0.0065(17)
 F46A 0.108(7) 0.022(3) 0.066(5) 0.005(3) 0.056(5) -0.001(3)
 C41 0.027(2) 0.015(2) 0.031(2) 0.0020(17) 0.0076(19) -0.0015(17)
 C75 0.023(2) 0.018(2) 0.021(2) -0.0003(16) 0.0046(17) -0.0031(17)
 C84 0.021(2) 0.0101(19) 0.034(2) 0.0015(17) 0.0061(18) -0.0008(16)
 C93 0.022(2) 0.018(2) 0.024(2) 0.0021(17) 0.0084(17) 0.0000(17)
 C79 0.023(2) 0.0110(19) 0.022(2) 0.0016(15) 0.0102(17) 0.0001(16)
 C58 0.022(2) 0.0141(19) 0.019(2) 0.0012(16) 0.0075(16) 0.0004(16)
 C92 0.021(2) 0.0130(19) 0.026(2) 0.0025(16) 0.0116(17) 0.0012(16)
 C39 0.022(2) 0.0126(19) 0.019(2) 0.0017(15) 0.0072(16) 0.0030(16)
 F28 0.069(3) 0.101(4) 0.140(4) 0.100(3) 0.052(3) 0.048(3)
 C26 0.023(2) 0.013(2) 0.035(2) -0.0002(17) 0.0087(19) 0.0017(17)
 C14 0.024(2) 0.016(2) 0.021(2) 0.0025(16) 0.0050(17) 0.0006(16)
 O1 0.088(3) 0.072(3) 0.030(2) -0.022(2) 0.015(2) -0.009(3)
 C38 0.019(2) 0.0111(19) 0.024(2) -0.0023(16) 0.0074(17) -0.0007(15)
 C57 0.020(2) 0.0133(19) 0.021(2) 0.0045(16) 0.0069(16) 0.0016(16)
 C56 0.021(2) 0.0083(18) 0.0188(19) 0.0009(15) 0.0068(16) -0.0008(15)
 C34 0.0177(19) 0.0090(18) 0.021(2) -0.0008(15) 0.0077(16) 0.0017(15)
 C12 0.021(2) 0.0133(19) 0.0186(19) 0.0029(15) 0.0081(16) 0.0017(16)
 C18 0.019(2) 0.015(2) 0.031(2) -0.0003(17) 0.0087(18) 0.0035(16)
 C35 0.018(2) 0.0134(19) 0.020(2) 0.0022(16) 0.0064(16) 0.0024(15)
 C81 0.020(2) 0.0117(19) 0.027(2) 0.0009(16) 0.0106(17) -0.0008(15)
 C6 0.022(2) 0.013(2) 0.023(2) -0.0015(16) 0.0078(17) 0.0010(16)
 C78 0.021(2) 0.0115(18) 0.0164(19) -0.0027(15) 0.0078(16) -0.0013(15)
 C36 0.024(2) 0.013(2) 0.020(2) 0.0022(16) 0.0104(17) 0.0031(16)
 F4 0.084(3) 0.138(5) 0.083(3) 0.002(3) 0.048(3) 0.059(3)
 C82 0.023(2) 0.0128(19) 0.020(2) -0.0005(16) 0.0091(17) -0.0008(16)
 C61 0.0184(19) 0.0128(19) 0.021(2) 0.0001(15) 0.0079(16) 0.0015(15)
 C48 0.026(2) 0.014(2) 0.027(2) 0.0069(17) 0.0125(18) 0.0023(16)
 C11 0.0184(19) 0.0086(18) 0.0194(19) 0.0012(15) 0.0068(16) 0.0019(15)
 C37 0.025(2) 0.0117(19) 0.024(2) 0.0003(16) 0.0110(17) -0.0004(16)
 C89 0.025(2) 0.0088(19) 0.040(3) 0.0036(18) 0.013(2) 0.0009(16)
 C73 0.024(2) 0.026(2) 0.022(2) 0.0014(18) 0.0056(18) -0.0089(18)
 C63 0.024(2) 0.015(2) 0.026(2) -0.0007(17) 0.0099(18) -0.0003(16)
 C15 0.021(2) 0.013(2) 0.029(2) 0.0015(17) 0.0096(18) 0.0031(16)
 C74 0.021(2) 0.023(2) 0.020(2) -0.0029(17) 0.0054(17) -0.0014(17)
 C83 0.019(2) 0.0117(19) 0.0171(19) 0.0013(15) 0.0057(16) 0.0021(15)
 C7 0.023(2) 0.024(2) 0.017(2) -0.0003(17) 0.0063(17) -0.0020(17)
 C49 0.033(2) 0.017(2) 0.025(2) 0.0001(17) 0.0107(19) 0.0036(18)
 C45 0.025(2) 0.013(2) 0.026(2) 0.0001(17) 0.0060(18) -0.0001(16)
 C22 0.026(2) 0.014(2) 0.033(2) -0.0009(17) 0.0086(19) 0.0014(17)
 C25 0.029(2) 0.018(2) 0.042(3) -0.005(2) 0.008(2) -0.0011(19)
 C19 0.025(2) 0.022(2) 0.033(2) -0.0070(19) 0.0115(19) -0.0032(18)
 C53 0.035(2) 0.017(2) 0.022(2) 0.0030(17) 0.0072(19) -0.0014(18)
 C71 0.021(2) 0.021(2) 0.027(2) 0.0003(17) 0.0096(18) -0.0022(17)
 C20 0.030(2) 0.029(3) 0.038(3) -0.013(2) 0.013(2) -0.002(2)
 C23 0.026(2) 0.016(2) 0.029(2) 0.0011(17) 0.0095(18) 0.0040(17)
 C64 0.026(2) 0.023(2) 0.027(2) 0.0015(18) 0.0117(18) 0.0015(18)
 C67 0.032(2) 0.016(2) 0.024(2) 0.0019(17) 0.0102(18) 0.0024(18)
 C94 0.025(2) 0.016(2) 0.032(2) 0.0042(18) 0.0098(19) -0.0056(17)
 C97 0.026(2) 0.026(2) 0.030(2) 0.0042(19) 0.0063(19) -0.0079(19)
 F17 0.108(4) 0.181(6) 0.031(2) -0.016(3) 0.010(2) 0.088(4)
 C42 0.026(2) 0.016(2) 0.038(3) -0.0037(19) 0.004(2) -0.0035(18)
 C88 0.022(2) 0.014(2) 0.051(3) 0.000(2) 0.013(2) 0.0022(17)
 C27 0.024(2) 0.024(2) 0.035(3) -0.0012(19) 0.0059(19) 0.0067(18)
 C31 0.025(2) 0.017(2) 0.044(3) -0.0023(19) 0.010(2) 0.0009(18)
 C87 0.027(2) 0.021(2) 0.052(3) 0.014(2) 0.006(2) 0.0053(19)
 C65 0.034(3) 0.026(2) 0.028(2) -0.0022(19) 0.015(2) 0.0054(19)
 C85 0.019(2) 0.023(2) 0.042(3) 0.011(2) 0.0106(19) 0.0014(18)
 C72 0.028(2) 0.019(2) 0.023(2) -0.0005(17) 0.0078(18) -0.0052(18)
 C76 0.025(2) 0.033(3) 0.031(2) 0.000(2) 0.010(2) -0.002(2)
 F9 0.167(5) 0.036(2) 0.161(5) 0.003(3) 0.129(5) 0.000(3)
 C52 0.042(3) 0.016(2) 0.031(2) 0.0060(18) 0.013(2) 0.0019(19)
 C77 0.034(3) 0.022(2) 0.042(3) 0.006(2) 0.014(2) -0.006(2)
 C30 0.025(2) 0.019(2) 0.061(3) -0.005(2) 0.015(2) 0.0002(19)
 C21 0.030(2) 0.020(2) 0.039(3) -0.010(2) 0.008(2) 0.0006(19)
 C44 0.029(2) 0.016(2) 0.035(3) 0.0023(18) 0.003(2) 0.0006(18)
 C98 0.032(3) 0.031(3) 0.035(3) 0.005(2) 0.006(2) -0.012(2)
 C96 0.035(2) 0.031(3) 0.031(2) 0.0127(19) 0.0059(19) -0.009(2)
 C91 0.028(3) 0.014(2) 0.067(4) 0.006(2) 0.018(2) 0.0062(19)
 C95 0.031(2) 0.022(2) 0.037(3) 0.009(2) 0.009(2) -0.0060(19)
 C68 0.046(3) 0.027(2) 0.029(2) -0.0001(18) 0.021(2) -0.003(2)
 C50 0.049(3) 0.026(2) 0.024(2) 0.0035(19) 0.012(2) 0.005(2)
 C66 0.038(3) 0.022(2) 0.031(2) 0.0005(19) 0.015(2) 0.007(2)
 C69 0.081(4) 0.027(3) 0.040(3) 0.004(2) 0.027(3) 0.019(3)
 F36A 0.074(7) 0.066(6) 0.028(3) 0.000(4) -0.002(4) 0.005(4)
 F18 0.315(10) 0.054(3) 0.058(3) 0.010(2) -0.081(4) -0.052(4)
 F7 0.038(2) 0.208(7) 0.136(5) -0.053(5) 0.045(3) -0.033(3)
 C54 0.056(3) 0.021(2) 0.035(3) 0.009(2) 0.004(2) 0.001(2)
 C28 0.026(2) 0.024(2) 0.048(3) -0.010(2) 0.004(2) 0.0023(19)
 C47 0.035(3) 0.026(3) 0.050(3) -0.005(2) 0.000(2) -0.001(2)
 C51 0.053(3) 0.022(2) 0.025(2) 0.0111(19) 0.009(2) 0.009(2)
 C46 0.033(3) 0.024(3) 0.052(3) 0.002(2) -0.004(2) 0.003(2)
 C43 0.022(2) 0.025(2) 0.041(3) 0.001(2) -0.004(2) -0.0024(19)
 C86 0.028(3) 0.030(3) 0.053(3) 0.022(2) 0.009(2) 0.004(2)
 C55 0.085(5) 0.031(3) 0.027(3) 0.001(2) 0.003(3) 0.013(3)
 C29 0.022(2) 0.022(2) 0.067(4) -0.013(2) 0.004(2) -0.0023(19)
 C32 0.035(3) 0.044(3) 0.057(4) -0.014(3) -0.004(3) 0.003(3)
 C1 0.051(3) 0.042(3) 0.033(3) -0.007(2) 0.009(2) 0.003(3)
 C33 0.035(3) 0.024(3) 0.097(5) -0.021(3) 0.034(3) -0.016(2)
 C2 0.040(3) 0.036(3) 0.029(3) 0.000(2) -0.005(2) -0.003(2)
 C24 0.049(4) 0.034(3) 0.080(5) -0.027(3) 0.033(3) -0.014(3)
 F47A 0.179(14) 0.078(8) 0.030(3) 0.021(4) -0.019(6) -0.085(9)
 C90 0.039(3) 0.065(4) 0.067(5) 0.044(4) 0.016(3) 0.015(3)
 C99B 0.052(3) 0.035(4) 0.030(2) 0.016(3) 0.004(2) -0.004(3)
 F34A 0.105(7) 0.137(12) 0.044(5) 0.051(6) -0.010(5) -0.076(8)
 F48A 0.072(5) 0.089(8) 0.137(11) 0.061(8) 0.080(6) 0.027(5)
 C04F 0.115(8) 0.077(6) 0.128(9) 0.032(6) 0.050(7) 0.023(6)
 Rh1A 0.0275(2) 0.0209(2) 0.0190(2) -0.00253(14) 0.00438(15) 0.00222(14)
 F48 0.18(3) 0.044(7) 0.080(15) 0.003(7) 0.111(19) 0.003(11)
 F47 0.071(8) 0.13(2) 0.079(14) 0.082(15) 0.034(8) 0.031(9)
 F46 0.14(2) 0.058(12) 0.047(7) 0.001(7) 0.021(9) -0.067(14)
 F36 0.067(7) 0.086(7) 0.037(3) 0.009(5) 0.011(4) 0.023(6)
 C99 0.052(3) 0.035(4) 0.030(2) 0.016(3) 0.004(2) -0.004(3)
 F34 0.118(8) 0.043(4) 0.049(6) 0.030(4) -0.030(5) -0.019(4)

_geom_special_details
;
 All esds (except the esd in the dihedral angle between two l.s. planes)
 are estimated using the full covariance matrix.  The cell esds are taken
 into account individually in the estimation of esds in distances, angles
 and torsion angles; correlations between esds in cell parameters are only
 used when they are defined by crystal symmetry.  An approximate (isotropic)
 treatment of cell esds is used for estimating esds involving l.s. planes.
;
loop_
  _geom_bond_atom_site_label_1
  _geom_bond_atom_site_label_2
  _geom_bond_distance
  _geom_bond_site_symmetry_2
  _geom_bond_publ_flag
 Rh1 Cl1 2.3545(13) . ?
 Rh1 C3 2.035(4) . ?
 Rh1 C1 1.913(5) . ?
 Rh1 C2 1.834(6) . ?
 F2 C25 1.339(6) . ?
 F42 C77 1.324(6) . ?
 F3 C25 1.339(5) . ?
 F38 C76 1.335(6) . ?
 F40 C77 1.342(6) . ?
 F41 C77 1.340(6) . ?
 F32 C98 1.340(6) . ?
 F39 C76 1.349(6) . ?
 F26 C91 1.318(6) . ?
 F19 C47 1.336(7) . ?
 F1 C25 1.332(5) . ?
 F15 C54 1.342(6) . ?
 Cl2 C04F 1.742(6) . ?
 Cl2 Rh1A 2.331(8) . ?
 F20 C47 1.334(7) . ?
 F14 C54 1.329(7) . ?
 F33 C98 1.325(6) . ?
 N1 C3 1.279(5) . ?
 N1 C4 1.537(5) . ?
 N1 C11 1.532(5) . ?
 F25 C91 1.329(7) . ?
 F37 C76 1.317(6) . ?
 F21 C47 1.327(6) . ?
 F44 C69 1.328(7) . ?
 F24 C46 1.306(6) . ?
 F12 C32 1.316(7) . ?
 F16 C55 1.304(7) . ?
 F23 C46 1.336(7) . ?
 F43 C69 1.345(8) . ?
 F45 C69 1.320(7) . ?
 F30 C90 1.314(7) . ?
 Cl4 C04F 1.753(7) . ?
 F10 C32 1.330(7) . ?
 F31 C98 1.319(6) . ?
 F22 C46 1.341(7) . ?
 F27 C91 1.341(6) . ?
 Cl3 C04F 1.747(7) . ?
 F13 C54 1.318(6) . ?
 F8 C33 1.289(7) . ?
 C59 C60 1.394(6) . ?
 C59 C58 1.388(6) . ?
 F35 C99B 1.425(19) . ?
 F35 C99 1.18(2) . ?
 C60 C70 1.488(6) . ?
 C60 C61 1.392(6) . ?
 C16 C17 1.393(6) . ?
 C16 C18 1.483(6) . ?
 C16 C15 1.395(6) . ?
 F11 C32 1.318(8) . ?
 C3 Rh1A 2.082(8) . ?
 C5 C4 1.515(5) . ?
 C5 C10 1.388(6) . ?
 C5 C6 1.386(6) . ?
 F6 C24 1.326(8) . ?
 C17 C12 1.387(6) . ?
 C4 C34 1.535(5) . ?
 C4 C12 1.530(5) . ?
 O2 C2 1.139(7) . ?
 F5 C24 1.315(7) . ?
 C13 C14 1.397(6) . ?
 C13 C12 1.392(6) . ?
 C8 C9 1.390(6) . ?
 C8 C7 1.395(6) . ?
 C9 C10 1.393(6) . ?
 C10 C11 1.521(5) . ?
 C80 C84 1.485(6) . ?
 C80 C79 1.385(6) . ?
 C80 C81 1.406(6) . ?
 C40 C41 1.393(6) . ?
 C40 C38 1.478(6) . ?
 C40 C45 1.398(6) . ?
 F29 C90 1.322(9) . ?
 C62 C58 1.483(6) . ?
 C62 C63 1.397(6) . ?
 C62 C67 1.396(6) . ?
 C70 C75 1.385(6) . ?
 C70 C71 1.397(6) . ?
 F46A C68 1.330(8) . ?
 C41 C42 1.388(7) . ?
 C75 C74 1.386(6) . ?
 C84 C89 1.389(6) . ?
 C84 C85 1.394(6) . ?
 C93 C92 1.393(6) . ?
 C93 C94 1.398(6) . ?
 C79 C78 1.394(6) . ?
 C58 C57 1.402(6) . ?
 C92 C82 1.486(6) . ?
 C92 C97 1.395(6) . ?
 C39 C38 1.403(6) . ?
 C39 C34 1.383(6) . ?
 F28 C90 1.336(7) . ?
 C26 C14 1.490(6) . ?
 C26 C27 1.396(7) . ?
 C26 C31 1.394(7) . ?
 C14 C15 1.398(6) . ?
 O1 C1 1.134(7) . ?
 C38 C37 1.402(6) . ?
 C57 C56 1.391(6) . ?
 C56 C61 1.391(6) . ?
 C56 C11 1.517(5) . ?
 C34 C35 1.394(6) . ?
 C18 C19 1.388(6) . ?
 C18 C23 1.392(6) . ?
 C35 C36 1.394(6) . ?
 C81 C82 1.396(6) . ?
 C6 C7 1.385(6) . ?
 C78 C11 1.544(5) . ?
 C78 C83 1.391(6) . ?
 C36 C48 1.494(6) . ?
 C36 C37 1.392(6) . ?
 F4 C24 1.302(8) . ?
 C82 C83 1.396(6) . ?
 C48 C49 1.399(6) . ?
 C48 C53 1.391(6) . ?
 C89 C88 1.384(6) . ?
 C73 C74 1.396(6) . ?
 C73 C72 1.379(7) . ?
 C63 C64 1.380(6) . ?
 C74 C76 1.502(6) . ?
 C49 C50 1.377(7) . ?
 C45 C44 1.381(6) . ?
 C22 C25 1.500(6) . ?
 C22 C23 1.390(6) . ?
 C22 C21 1.377(7) . ?
 C19 C20 1.385(6) . ?
 C53 C52 1.404(6) . ?
 C71 C72 1.379(6) . ?
 C20 C21 1.389(7) . ?
 C20 C24 1.518(8) . ?
 C64 C65 1.399(6) . ?
 C64 C68 1.486(6) . ?
 C67 C66 1.388(6) . ?
 C94 C98 1.495(6) . ?
 C94 C95 1.376(7) . ?
 C97 C96 1.393(6) . ?
 F17 C55 1.323(8) . ?
 C42 C47 1.498(7) . ?
 C42 C43 1.379(7) . ?
 C88 C87 1.389(7) . ?
 C88 C91 1.495(7) . ?
 C27 C28 1.392(7) . ?
 C31 C30 1.390(7) . ?
 C87 C86 1.376(7) . ?
 C65 C66 1.380(7) . ?
 C85 C86 1.403(7) . ?
 C72 C77 1.513(6) . ?
 F9 C33 1.301(8) . ?
 C52 C54 1.508(7) . ?
 C52 C51 1.374(7) . ?
 C30 C29 1.395(8) . ?
 C30 C33 1.495(8) . ?
 C44 C46 1.505(7) . ?
 C44 C43 1.400(7) . ?
 C96 C95 1.379(7) . ?
 C96 C99B 1.421(18) . ?
 C96 C99 1.611(18) . ?
 C68 F47A 1.280(8) . ?
 C68 F48A 1.330(8) . ?
 C68 F48 1.278(12) . ?
 C68 F47 1.349(14) . ?
 C68 F46 1.214(14) . ?
 C50 C51 1.393(7) . ?
 C50 C55 1.488(7) . ?
 C66 C69 1.510(7) . ?
 F36A C99B 1.43(2) . ?
 F18 C55 1.306(8) . ?
 F7 C33 1.320(8) . ?
 C28 C29 1.363(8) . ?
 C28 C32 1.497(8) . ?
 C86 C90 1.506(8) . ?
 C99B F34A 1.32(2) . ?
 F36 C99 1.30(2) . ?
 C99 F34 1.25(2) . ?

loop_
  _geom_angle_atom_site_label_1
  _geom_angle_atom_site_label_2
  _geom_angle_atom_site_label_3
  _geom_angle
  _geom_angle_site_symmetry_1
  _geom_angle_site_symmetry_3
  _geom_angle_publ_flag
 C3 Rh1 Cl1 84.38(12) . . ?
 C1 Rh1 Cl1 88.53(19) . . ?
 C1 Rh1 C3 169.5(2) . . ?
 C2 Rh1 Cl1 174.36(18) . . ?
 C2 Rh1 C3 94.3(2) . . ?
 C2 Rh1 C1 92.0(2) . . ?
 C04F Cl2 Rh1A 88.4(4) . . ?
 C3 N1 C4 124.1(3) . . ?
 C3 N1 C11 126.7(3) . . ?
 C11 N1 C4 109.2(3) . . ?
 C58 C59 C60 121.0(4) . . ?
 C59 C60 C70 120.5(4) . . ?
 C61 C60 C59 119.4(4) . . ?
 C61 C60 C70 120.1(4) . . ?
 C17 C16 C18 117.6(4) . . ?
 C17 C16 C15 118.5(4) . . ?
 C15 C16 C18 123.9(4) . . ?
 N1 C3 Rh1 139.4(3) . . ?
 N1 C3 Rh1A 140.3(4) . . ?
 C10 C5 C4 111.3(3) . . ?
 C6 C5 C4 127.3(4) . . ?
 C6 C5 C10 121.4(4) . . ?
 C12 C17 C16 121.8(4) . . ?
 C5 C4 N1 100.9(3) . . ?
 C5 C4 C34 114.4(3) . . ?
 C5 C4 C12 108.3(3) . . ?
 C34 C4 N1 108.3(3) . . ?
 C12 C4 N1 113.0(3) . . ?
 C12 C4 C34 111.5(3) . . ?
 C12 C13 C14 120.2(4) . . ?
 C9 C8 C7 120.8(4) . . ?
 C8 C9 C10 118.9(4) . . ?
 C5 C10 C9 119.9(4) . . ?
 C5 C10 C11 111.6(3) . . ?
 C9 C10 C11 128.5(4) . . ?
 C79 C80 C84 120.7(4) . . ?
 C79 C80 C81 118.7(4) . . ?
 C81 C80 C84 120.6(4) . . ?
 C41 C40 C38 121.7(4) . . ?
 C41 C40 C45 118.2(4) . . ?
 C45 C40 C38 120.1(4) . . ?
 C63 C62 C58 120.2(4) . . ?
 C67 C62 C58 121.0(4) . . ?
 C67 C62 C63 118.9(4) . . ?
 C75 C70 C60 121.4(4) . . ?
 C75 C70 C71 118.8(4) . . ?
 C71 C70 C60 119.8(4) . . ?
 C42 C41 C40 120.4(4) . . ?
 C70 C75 C74 120.9(4) . . ?
 C89 C84 C80 120.9(4) . . ?
 C89 C84 C85 118.3(4) . . ?
 C85 C84 C80 120.7(4) . . ?
 C92 C93 C94 120.1(4) . . ?
 C80 C79 C78 121.7(4) . . ?
 C59 C58 C62 121.5(4) . . ?
 C59 C58 C57 118.8(4) . . ?
 C57 C58 C62 119.7(4) . . ?
 C93 C92 C82 120.7(4) . . ?
 C93 C92 C97 118.7(4) . . ?
 C97 C92 C82 120.6(4) . . ?
 C34 C39 C38 120.9(4) . . ?
 C27 C26 C14 121.0(4) . . ?
 C31 C26 C14 120.4(4) . . ?
 C31 C26 C27 118.6(4) . . ?
 C13 C14 C26 121.0(4) . . ?
 C13 C14 C15 119.6(4) . . ?
 C15 C14 C26 119.3(4) . . ?
 C39 C38 C40 119.1(4) . . ?
 C37 C38 C40 121.8(4) . . ?
 C37 C38 C39 119.1(4) . . ?
 C56 C57 C58 120.9(4) . . ?
 C57 C56 C61 119.2(4) . . ?
 C57 C56 C11 120.8(4) . . ?
 C61 C56 C11 120.0(3) . . ?
 C39 C34 C4 122.0(4) . . ?
 C39 C34 C35 119.2(4) . . ?
 C35 C34 C4 118.7(3) . . ?
 C17 C12 C4 116.5(4) . . ?
 C17 C12 C13 119.2(4) . . ?
 C13 C12 C4 123.5(4) . . ?
 C19 C18 C16 122.6(4) . . ?
 C19 C18 C23 118.4(4) . . ?
 C23 C18 C16 118.9(4) . . ?
 C36 C35 C34 121.1(4) . . ?
 C82 C81 C80 120.3(4) . . ?
 C7 C6 C5 118.8(4) . . ?
 C79 C78 C11 116.5(3) . . ?
 C83 C78 C79 119.0(4) . . ?
 C83 C78 C11 124.4(4) . . ?
 C35 C36 C48 117.2(4) . . ?
 C37 C36 C35 119.3(4) . . ?
 C37 C36 C48 123.5(4) . . ?
 C81 C82 C92 119.7(4) . . ?
 C81 C82 C83 119.8(4) . . ?
 C83 C82 C92 120.5(4) . . ?
 C56 C61 C60 120.7(4) . . ?
 C49 C48 C36 119.1(4) . . ?
 C53 C48 C36 121.4(4) . . ?
 C53 C48 C49 119.2(4) . . ?
 N1 C11 C78 110.8(3) . . ?
 C10 C11 N1 99.9(3) . . ?
 C10 C11 C78 108.1(3) . . ?
 C56 C11 N1 111.2(3) . . ?
 C56 C11 C10 113.9(3) . . ?
 C56 C11 C78 112.2(3) . . ?
 C36 C37 C38 120.5(4) . . ?
 C88 C89 C84 121.1(4) . . ?
 C72 C73 C74 118.7(4) . . ?
 C64 C63 C62 120.5(4) . . ?
 C16 C15 C14 120.7(4) . . ?
 C75 C74 C73 120.1(4) . . ?
 C75 C74 C76 120.2(4) . . ?
 C73 C74 C76 119.6(4) . . ?
 C78 C83 C82 120.4(4) . . ?
 C6 C7 C8 120.2(4) . . ?
 C50 C49 C48 120.5(4) . . ?
 C44 C45 C40 120.8(4) . . ?
 C23 C22 C25 117.2(4) . . ?
 C21 C22 C25 122.6(4) . . ?
 C21 C22 C23 120.2(4) . . ?
 F2 C25 F3 105.8(4) . . ?
 F2 C25 C22 111.9(4) . . ?
 F3 C25 C22 111.3(4) . . ?
 F1 C25 F2 107.1(4) . . ?
 F1 C25 F3 107.9(4) . . ?
 F1 C25 C22 112.5(4) . . ?
 C20 C19 C18 120.4(4) . . ?
 C48 C53 C52 119.5(4) . . ?
 C72 C71 C70 120.1(4) . . ?
 C19 C20 C21 120.8(4) . . ?
 C19 C20 C24 119.5(4) . . ?
 C21 C20 C24 119.7(4) . . ?
 C22 C23 C18 121.0(4) . . ?
 C63 C64 C65 120.6(4) . . ?
 C63 C64 C68 120.0(4) . . ?
 C65 C64 C68 119.4(4) . . ?
 C66 C67 C62 120.0(4) . . ?
 C93 C94 C98 118.5(4) . . ?
 C95 C94 C93 121.1(4) . . ?
 C95 C94 C98 120.5(4) . . ?
 C96 C97 C92 120.1(4) . . ?
 C41 C42 C47 117.9(4) . . ?
 C43 C42 C41 121.7(4) . . ?
 C43 C42 C47 120.4(4) . . ?
 C89 C88 C87 120.6(4) . . ?
 C89 C88 C91 121.0(4) . . ?
 C87 C88 C91 118.4(4) . . ?
 C28 C27 C26 120.3(5) . . ?
 C30 C31 C26 120.5(5) . . ?
 C86 C87 C88 118.9(4) . . ?
 C66 C65 C64 118.7(4) . . ?
 C84 C85 C86 120.2(4) . . ?
 C73 C72 C71 121.4(4) . . ?
 C73 C72 C77 118.6(4) . . ?
 C71 C72 C77 120.0(4) . . ?
 F38 C76 F39 105.9(4) . . ?
 F38 C76 C74 112.2(4) . . ?
 F39 C76 C74 110.7(4) . . ?
 F37 C76 F38 106.8(4) . . ?
 F37 C76 F39 107.7(4) . . ?
 F37 C76 C74 113.1(4) . . ?
 C53 C52 C54 120.3(4) . . ?
 C51 C52 C53 121.0(4) . . ?
 C51 C52 C54 118.5(4) . . ?
 F42 C77 F40 107.3(4) . . ?
 F42 C77 F41 107.1(4) . . ?
 F42 C77 C72 113.1(4) . . ?
 F40 C77 C72 111.0(4) . . ?
 F41 C77 F40 106.2(4) . . ?
 F41 C77 C72 111.8(4) . . ?
 C31 C30 C29 120.0(5) . . ?
 C31 C30 C33 119.7(5) . . ?
 C29 C30 C33 120.3(5) . . ?
 C22 C21 C20 119.2(4) . . ?
 C45 C44 C46 118.9(4) . . ?
 C45 C44 C43 121.1(4) . . ?
 C43 C44 C46 120.0(4) . . ?
 F32 C98 C94 112.3(4) . . ?
 F33 C98 F32 106.2(4) . . ?
 F33 C98 C94 112.5(4) . . ?
 F31 C98 F32 106.5(4) . . ?
 F31 C98 F33 106.5(5) . . ?
 F31 C98 C94 112.4(4) . . ?
 C97 C96 C99B 117.2(9) . . ?
 C97 C96 C99 120.0(8) . . ?
 C95 C96 C97 121.1(4) . . ?
 C95 C96 C99B 121.4(9) . . ?
 C95 C96 C99 118.3(8) . . ?
 F26 C91 F25 107.5(4) . . ?
 F26 C91 F27 106.8(5) . . ?
 F26 C91 C88 113.6(4) . . ?
 F25 C91 F27 106.2(4) . . ?
 F25 C91 C88 112.0(5) . . ?
 F27 C91 C88 110.4(4) . . ?
 C94 C95 C96 118.9(4) . . ?
 F46A C68 C64 114.1(5) . . ?
 F47A C68 F46A 106.9(8) . . ?
 F47A C68 C64 114.0(5) . . ?
 F47A C68 F48A 106.8(9) . . ?
 F48A C68 F46A 102.6(7) . . ?
 F48A C68 C64 111.6(5) . . ?
 F48 C68 C64 114.6(7) . . ?
 F48 C68 F47 102.9(14) . . ?
 F47 C68 C64 109.4(7) . . ?
 F46 C68 C64 115.3(8) . . ?
 F46 C68 F48 110.8(15) . . ?
 F46 C68 F47 102.2(15) . . ?
 C49 C50 C51 120.6(4) . . ?
 C49 C50 C55 120.5(5) . . ?
 C51 C50 C55 118.9(4) . . ?
 C67 C66 C69 118.5(4) . . ?
 C65 C66 C67 121.3(4) . . ?
 C65 C66 C69 120.3(4) . . ?
 F44 C69 F43 107.4(5) . . ?
 F44 C69 C66 111.2(5) . . ?
 F43 C69 C66 110.9(5) . . ?
 F45 C69 F44 107.9(5) . . ?
 F45 C69 F43 106.7(5) . . ?
 F45 C69 C66 112.6(5) . . ?
 F15 C54 C52 110.9(4) . . ?
 F14 C54 F15 106.2(4) . . ?
 F14 C54 C52 112.0(5) . . ?
 F13 C54 F15 107.3(5) . . ?
 F13 C54 F14 108.3(5) . . ?
 F13 C54 C52 111.9(4) . . ?
 C27 C28 C32 118.3(5) . . ?
 C29 C28 C27 120.9(5) . . ?
 C29 C28 C32 120.8(5) . . ?
 F19 C47 C42 111.4(4) . . ?
 F20 C47 F19 105.7(4) . . ?
 F20 C47 C42 112.4(5) . . ?
 F21 C47 F19 107.3(5) . . ?
 F21 C47 F20 106.9(4) . . ?
 F21 C47 C42 112.8(4) . . ?
 C52 C51 C50 119.2(4) . . ?
 F24 C46 F23 107.9(5) . . ?
 F24 C46 F22 107.9(5) . . ?
 F24 C46 C44 113.7(4) . . ?
 F23 C46 F22 104.0(4) . . ?
 F23 C46 C44 111.5(4) . . ?
 F22 C46 C44 111.3(4) . . ?
 C42 C43 C44 117.8(4) . . ?
 C87 C86 C85 120.8(5) . . ?
 C87 C86 C90 120.7(5) . . ?
 C85 C86 C90 118.5(5) . . ?
 F16 C55 F17 104.4(5) . . ?
 F16 C55 C50 113.9(5) . . ?
 F16 C55 F18 107.6(7) . . ?
 F17 C55 C50 112.4(6) . . ?
 F18 C55 F17 104.6(7) . . ?
 F18 C55 C50 113.1(5) . . ?
 C28 C29 C30 119.7(5) . . ?
 F12 C32 F10 105.5(5) . . ?
 F12 C32 F11 107.8(6) . . ?
 F12 C32 C28 112.8(5) . . ?
 F10 C32 C28 113.4(6) . . ?
 F11 C32 F10 104.7(5) . . ?
 F11 C32 C28 112.0(5) . . ?
 O1 C1 Rh1 176.6(6) . . ?
 F8 C33 F9 108.0(6) . . ?
 F8 C33 C30 113.5(4) . . ?
 F8 C33 F7 108.2(5) . . ?
 F9 C33 C30 112.4(5) . . ?
 F9 C33 F7 102.5(6) . . ?
 F7 C33 C30 111.7(6) . . ?
 O2 C2 Rh1 177.4(5) . . ?
 F6 C24 C20 113.2(5) . . ?
 F5 C24 F6 105.2(6) . . ?
 F5 C24 C20 112.3(5) . . ?
 F4 C24 F6 108.6(6) . . ?
 F4 C24 F5 107.8(5) . . ?
 F4 C24 C20 109.5(6) . . ?
 F30 C90 F29 106.0(6) . . ?
 F30 C90 F28 108.3(6) . . ?
 F30 C90 C86 112.9(5) . . ?
 F29 C90 F28 105.4(6) . . ?
 F29 C90 C86 112.1(6) . . ?
 F28 C90 C86 111.6(6) . . ?
 F35 C99B F36A 93.2(13) . . ?
 C96 C99B F35 111.2(14) . . ?
 C96 C99B F36A 116.8(11) . . ?
 F34A C99B F35 116.4(11) . . ?
 F34A C99B C96 116.5(14) . . ?
 F34A C99B F36A 100.0(15) . . ?
 Cl2 C04F Cl4 111.7(4) . . ?
 Cl2 C04F Cl3 116.0(5) . . ?
 Cl3 C04F Cl4 108.0(5) . . ?
 C3 Rh1A Cl2 111.0(3) . . ?
 F35 C99 C96 113.7(14) . . ?
 F35 C99 F36 112.5(18) . . ?
 F35 C99 F34 104.5(13) . . ?
 F36 C99 C96 102.0(12) . . ?
 F34 C99 C96 112.0(14) . . ?
 F34 C99 F36 112.3(17) . . ?

_smtbx_masks_special_details       ?
loop_
  _smtbx_masks_void_nr
  _smtbx_masks_void_average_x
  _smtbx_masks_void_average_y
  _smtbx_masks_void_average_z
  _smtbx_masks_void_volume
  _smtbx_masks_void_count_electrons
  _smtbx_masks_void_content
 1 0.030 0.183 0.300 157.7 50.1 ?
 2 0.030 0.317 0.800 157.7 50.1 ?
 3 -0.030 0.683 0.200 157.7 50.1 ?
 4 -0.030 0.817 0.700 157.7 50.1 ?
 5 0.112 0.696 0.903 11.2 0.0 ?
 6 0.112 0.804 0.403 11.2 0.0 ?
 7 0.888 0.196 0.597 11.2 0.0 ?
 8 0.888 0.304 0.097 11.2 0.0 ?

_shelx_res_file
;
TITL Prelim_a.res in P2(1)/c
    prelim_a_sq.res
    created by SHELXL-2016/6 at 10:14:42 on 09-Apr-2018
CELL 0.71073 18.5567 23.3531 23.8508 90 105.989 90
ZERR 4 0.0016 0.002 0.0018 0 0.002 0
LATT 1
SYMM -X,0.5+Y,0.5-Z
SFAC C H Cl F N O Rh
UNIT 400 168 16 192 4 8 4
SADI 0.01 Cl3 C04F Cl4 C04F Cl2 C04F
RIGU 0.002 0.002 F35 H95 F36A C99B F34A F36 C99 F34 C96
RIGU F47 C68 F48 F46 C64
RIGU F46A C68 F47A F48A C64
EADP Rh1a Rh1
EADP C99 C99B

L.S. 10 0 55
PLAN  40
SIZE 0.05 0.23 0.6
TEMP -173.15
FREE Rh1a Cl1
ABIN
fmap 2
acta
REM <olex2.extras>
REM <HklSrc "%.\\GB_RN_01042018_0m.hkl">
REM </olex2.extras>

WGHT    0.113200   40.361099
FVAR       0.12922   0.95168   0.66354   0.50755
PART 1
RH1   7    0.620441    0.201962    0.288527    21.00000    0.02749    0.02094 =
         0.01904   -0.00253    0.00438    0.00222
PART 0
CL1   3    0.707534    0.270013    0.274598    11.00000    0.03848    0.05696 =
         0.02479    0.00835    0.00795   -0.01424
F2    4    0.658116    0.574916    0.490258    11.00000    0.03951    0.02592 =
         0.04488    0.00790    0.01605    0.00433
F42   4    0.560020   -0.163016    0.436348    11.00000    0.03655    0.01916 =
         0.06556    0.00726    0.01392    0.00083
F3    4    0.744530    0.529018    0.551445    11.00000    0.02548    0.02375 =
         0.06660    0.00472    0.01251    0.00155
F38   4    0.377568    0.094527    0.459673    11.00000    0.03814    0.02775 =
         0.05323   -0.00333    0.01949    0.00601
F40   4    0.466065   -0.159252    0.472305    11.00000    0.06359    0.02838 =
         0.06102    0.01592    0.03615   -0.00295
F41   4    0.448205   -0.166398    0.379834    11.00000    0.05020    0.02044 =
         0.05643   -0.00533    0.00549   -0.01060
F32   4    1.099350    0.450383    0.404796    11.00000    0.04211    0.02522 =
         0.06393    0.01252    0.00117   -0.01801
F39   4    0.326256    0.014439    0.469734    11.00000    0.03913    0.04053 =
         0.07472    0.00450    0.03900    0.00002
F26   4    1.187571    0.074201    0.463084    11.00000    0.03683    0.04350 =
         0.06019    0.00714    0.02628    0.01516
F19   4    1.021554    0.474247    0.695924    11.00000    0.05427    0.02956 =
         0.05234   -0.01412    0.00785   -0.00619
F1    4    0.692971    0.602446    0.579616    11.00000    0.05539    0.01923 =
         0.05602   -0.01039    0.01909   -0.01439
F15   4    0.744261    0.641469    0.335908    11.00000    0.06734    0.01858 =
         0.05552    0.01619    0.02187   -0.00318
CL2   3    0.473860    0.320781    0.306718    11.00000    0.11806    0.10802 =
         0.16459    0.06518    0.05325    0.03465
F20   4    1.079362    0.495652    0.633138    11.00000    0.05084    0.02187 =
         0.07710   -0.00714    0.01578   -0.01621
F14   4    0.667182    0.624508    0.385880    11.00000    0.08438    0.01994 =
         0.07188    0.00169    0.04256    0.00619
F33   4    1.150248    0.374231    0.446911    11.00000    0.03021    0.03795 =
         0.07985    0.01550   -0.01253   -0.01103
N1    5    0.681612    0.226727    0.421746    11.00000    0.01729    0.00953 =
         0.01822   -0.00107    0.00718   -0.00117
F25   4    1.245029    0.060023    0.552658    11.00000    0.02225    0.07782 =
         0.07241    0.01618    0.01288    0.00765
F37   4    0.309157    0.052241    0.384742    11.00000    0.03349    0.08209 =
         0.04618   -0.00737   -0.00343    0.02051
F21   4    1.134460    0.445479    0.707560    11.00000    0.04492    0.03433 =
         0.08789   -0.01807   -0.02575    0.00037
F44   4    0.811372   -0.133173    0.280206    11.00000    0.13535    0.03215 =
         0.05347    0.01493    0.03398    0.04334
F24   4    1.148822    0.245737    0.671040    11.00000    0.05227    0.02658 =
         0.09578    0.00201   -0.03271    0.01111
F12   4    0.343881    0.145860    0.299139    11.00000    0.04972    0.07607 =
         0.06881   -0.04402   -0.00096    0.01109
F16   4    0.590929    0.489267    0.205772    11.00000    0.06979    0.08183 =
         0.03018   -0.00562   -0.00792    0.03542
F23   4    1.043574    0.202695    0.641359    11.00000    0.05532    0.02079 =
         0.09340    0.01352    0.00705    0.00371
F43   4    0.718444   -0.136144    0.202660    11.00000    0.10921    0.01758 =
         0.07883   -0.01137    0.04282   -0.00587
F45   4    0.829213   -0.119686    0.196282    11.00000    0.10768    0.03395 =
         0.07966    0.00247    0.06232    0.02910
F30   4    0.953559    0.002394    0.638193    11.00000    0.03969    0.08789 =
         0.09678    0.06604    0.02702    0.00893
CL4   3    0.400335    0.365075    0.191897    11.00000    0.44519    0.07449 =
         0.14542    0.03862    0.16653    0.08487
F10   4    0.230248    0.146345    0.298819    11.00000    0.04800    0.08600 =
         0.08793   -0.04859   -0.00350   -0.01826
F31   4    1.076319    0.421619    0.482858    11.00000    0.08192    0.08298 =
         0.05589   -0.03278    0.02686   -0.05507
F22   4    1.103531    0.224377    0.580940    11.00000    0.07025    0.04993 =
         0.07669   -0.00444    0.01910    0.03061
F27   4    1.187628   -0.008978    0.500255    11.00000    0.07095    0.01371 =
         0.20081   -0.00707    0.08866    0.00563
CL3   3    0.412370    0.244694    0.205580    11.00000    0.12054    0.08990 =
         0.25324    0.04891   -0.01694   -0.00954
F13   4    0.785596    0.619097    0.426211    11.00000    0.12098    0.01537 =
         0.05125    0.00026   -0.02522   -0.00099
F8    4    0.241248    0.272627    0.530333    11.00000    0.08308    0.05305 =
         0.14312   -0.05502    0.08929   -0.03691
C59   1    0.638379    0.022113    0.347008    11.00000    0.02254    0.01596 =
         0.02206   -0.00124    0.00394   -0.00199
AFIX  43
H59   2    0.618962   -0.012039    0.326804    11.00000   -1.20000
AFIX   0
F35   4    0.811658    0.374093    0.241332    11.00000    0.05845    0.09143 =
         0.04265    0.01173    0.00195    0.02401
C60   1    0.608398    0.042534    0.390735    11.00000    0.01989    0.01391 =
         0.02366    0.00039    0.00648   -0.00185
C16   1    0.548706    0.370289    0.510313    11.00000    0.02262    0.01564 =
         0.02196    0.00199    0.00860    0.00048
F11   4    0.274988    0.218338    0.267840    11.00000    0.14054    0.06017 =
         0.04784   -0.01015   -0.01580    0.00498
C3    1    0.641924    0.236804    0.369658    11.00000    0.01937    0.01339 =
         0.02261    0.00057    0.00634    0.00077
PART 1
AFIX  43
H3A   2    0.613903    0.271039    0.368511    21.00000   -1.20000
AFIX  43
PART 0
PART 2
H3B   2    0.626463    0.201737    0.349794   -21.00000   -1.20000
AFIX   0
PART 0
C5    1    0.707375    0.224734    0.524054    11.00000    0.01330    0.01290 =
         0.02110    0.00044    0.00389   -0.00146
F6    4    0.472245    0.457882    0.680029    11.00000    0.12344    0.07243 =
         0.09312   -0.02648    0.08293   -0.02214
C17   1    0.612797    0.345750    0.500927    11.00000    0.01850    0.01417 =
         0.02399    0.00070    0.00750    0.00009
AFIX  43
H17   2    0.659294    0.365305    0.514138    11.00000   -1.20000
AFIX   0
C4    1    0.686100    0.266741    0.473773    11.00000    0.01752    0.01255 =
         0.01780   -0.00201    0.00608   -0.00015
O2    6    0.497675    0.126842    0.303337    11.00000    0.04312    0.05499 =
         0.05454    0.01893   -0.00248   -0.00988
F5    4    0.541579    0.529766    0.704664    11.00000    0.08491    0.11025 =
         0.05228   -0.03322    0.03020   -0.00776
C13   1    0.542484    0.264768    0.453482    11.00000    0.02217    0.01184 =
         0.02011    0.00134    0.00629    0.00051
AFIX  43
H13   2    0.540265    0.229097    0.433931    11.00000   -1.20000
AFIX   0
C8    1    0.742814    0.135618    0.602590    11.00000    0.02410    0.01508 =
         0.02237    0.00386    0.00689   -0.00279
AFIX  43
H8    2    0.755216    0.105136    0.629938    11.00000   -1.20000
AFIX   0
C9    1    0.744338    0.126555    0.545338    11.00000    0.01820    0.01382 =
         0.02212    0.00302    0.00552    0.00025
AFIX  43
H9    2    0.756530    0.089953    0.533153    11.00000   -1.20000
AFIX   0
C10   1    0.727678    0.172072    0.506124    11.00000    0.01361    0.01151 =
         0.02199   -0.00224    0.00691   -0.00280
C80   1    0.941114    0.153203    0.479421    11.00000    0.02214    0.01476 =
         0.02544    0.00217    0.01140    0.00257
C40   1    0.939911    0.354763    0.561476    11.00000    0.02228    0.01329 =
         0.02538    0.00263    0.01013   -0.00011
F29   4    1.043901    0.048494    0.692049    11.00000    0.08578    0.14293 =
         0.05124    0.03574    0.02214   -0.00757
C62   1    0.727284    0.030516    0.285154    11.00000    0.02142    0.01587 =
         0.02098   -0.00159    0.00880    0.00036
C70   1    0.545831    0.011595    0.405360    11.00000    0.02246    0.01886 =
         0.01835   -0.00187    0.00782   -0.00648
PART 1
F46A  4    0.785660    0.147342    0.175695    31.00000    0.10806    0.02190 =
         0.06645    0.00485    0.05649   -0.00076
PART 0
C41   1    0.972283    0.403673    0.591504    11.00000    0.02683    0.01486 =
         0.03086    0.00199    0.00760   -0.00149
AFIX  43
H41   2    0.948207    0.439704    0.582145    11.00000   -1.20000
AFIX   0
C75   1    0.485337    0.040706    0.415006    11.00000    0.02266    0.01830 =
         0.02070   -0.00027    0.00457   -0.00306
AFIX  43
H75   2    0.483591    0.081298    0.412359    11.00000   -1.20000
AFIX   0
C84   1    0.996977    0.111573    0.513066    11.00000    0.02092    0.01006 =
         0.03438    0.00152    0.00611   -0.00084
C93   1    0.998054    0.322095    0.424314    11.00000    0.02155    0.01752 =
         0.02405    0.00208    0.00843    0.00004
AFIX  43
H93   2    1.023763    0.311861    0.463236    11.00000   -1.20000
AFIX   0
C79   1    0.865369    0.145787    0.473604    11.00000    0.02258    0.01099 =
         0.02241    0.00158    0.01017    0.00011
AFIX  43
H79   2    0.849398    0.113596    0.491402    11.00000   -1.20000
AFIX   0
C58   1    0.696203    0.050977    0.332571    11.00000    0.02194    0.01412 =
         0.01889    0.00119    0.00752    0.00041
C92   1    0.936534    0.290111    0.393434    11.00000    0.02077    0.01303 =
         0.02602    0.00247    0.01155    0.00117
C39   1    0.813969    0.313343    0.516450    11.00000    0.02189    0.01259 =
         0.01870    0.00167    0.00719    0.00302
AFIX  43
H39   2    0.825531    0.284061    0.545190    11.00000   -1.20000
AFIX   0
F28   4    1.065085   -0.032205    0.659707    11.00000    0.06933    0.10074 =
         0.14017    0.09964    0.05244    0.04830
C26   1    0.404030    0.258087    0.442323    11.00000    0.02292    0.01328 =
         0.03498   -0.00023    0.00872    0.00169
C14   1    0.477444    0.288178    0.462736    11.00000    0.02373    0.01562 =
         0.02107    0.00250    0.00497    0.00058
O1    6    0.585593    0.175256    0.158840    11.00000    0.08808    0.07164 =
         0.03027   -0.02176    0.01478   -0.00892
C38   1    0.866542    0.356664    0.517061    11.00000    0.01871    0.01115 =
         0.02357   -0.00227    0.00735   -0.00071
C57   1    0.725284    0.100635    0.363643    11.00000    0.02010    0.01330 =
         0.02052    0.00448    0.00686    0.00164
AFIX  43
H57   2    0.764987    0.120654    0.354252    11.00000   -1.20000
AFIX   0
C56   1    0.696801    0.121009    0.408050    11.00000    0.02087    0.00829 =
         0.01883    0.00086    0.00680   -0.00084
C34   1    0.745514    0.312701    0.474551    11.00000    0.01766    0.00902 =
         0.02061   -0.00078    0.00767    0.00169
C12   1    0.610549    0.293526    0.472807    11.00000    0.02071    0.01325 =
         0.01859    0.00287    0.00806    0.00169
C18   1    0.556702    0.426800    0.539798    11.00000    0.01898    0.01476 =
         0.03083   -0.00029    0.00870    0.00348
C35   1    0.728710    0.356082    0.432789    11.00000    0.01839    0.01338 =
         0.02016    0.00215    0.00638    0.00240
AFIX  43
H35   2    0.682034    0.355490    0.403617    11.00000   -1.20000
AFIX   0
C81   1    0.964213    0.201174    0.453252    11.00000    0.01993    0.01167 =
         0.02651    0.00090    0.01062   -0.00084
AFIX  43
H81   2    1.016082    0.207702    0.457994    11.00000   -1.20000
AFIX   0
C6    1    0.705147    0.233768    0.580988    11.00000    0.02239    0.01309 =
         0.02262   -0.00150    0.00776    0.00096
AFIX  43
H6    2    0.691414    0.270075    0.592783    11.00000   -1.20000
AFIX   0
C78   1    0.811934    0.184360    0.442291    11.00000    0.02135    0.01151 =
         0.01643   -0.00265    0.00783   -0.00125
C36   1    0.779283    0.400288    0.433157    11.00000    0.02399    0.01317 =
         0.02016    0.00220    0.01036    0.00313
F4    4    0.439747    0.538348    0.638259    11.00000    0.08401    0.13794 =
         0.08262    0.00214    0.04789    0.05940
C82   1    0.911270    0.239252    0.420334    11.00000    0.02271    0.01280 =
         0.02012   -0.00052    0.00907   -0.00080
C61   1    0.637249    0.092392    0.420480    11.00000    0.01838    0.01281 =
         0.02120    0.00014    0.00791    0.00147
AFIX  43
H61   2    0.616079    0.107038    0.449560    11.00000   -1.20000
AFIX   0
C48   1    0.754830    0.446335    0.388495    11.00000    0.02588    0.01355 =
         0.02652    0.00685    0.01248    0.00225
C11   1    0.730034    0.173660    0.442920    11.00000    0.01838    0.00859 =
         0.01938    0.00116    0.00684    0.00188
C37   1    0.847987    0.400610    0.475546    11.00000    0.02519    0.01171 =
         0.02401    0.00030    0.01102   -0.00036
AFIX  43
H37   2    0.882536    0.430823    0.476343    11.00000   -1.20000
AFIX   0
C89   1    1.061569    0.099098    0.496772    11.00000    0.02528    0.00881 =
         0.04046    0.00360    0.01320    0.00091
AFIX  43
H89   2    1.070082    0.117490    0.463644    11.00000   -1.20000
AFIX   0
C73   1    0.429262   -0.048204    0.432635    11.00000    0.02387    0.02570 =
         0.02200    0.00139    0.00559   -0.00885
AFIX  43
H73   2    0.389679   -0.068586    0.441809    11.00000   -1.20000
AFIX   0
C63   1    0.745297    0.069633    0.246773    11.00000    0.02444    0.01453 =
         0.02564   -0.00068    0.00991   -0.00033
AFIX  43
H63   2    0.737311    0.109386    0.251048    11.00000   -1.20000
AFIX   0
C15   1    0.481101    0.340603    0.491662    11.00000    0.02126    0.01288 =
         0.02913    0.00148    0.00960    0.00311
AFIX  43
H15   2    0.437093    0.356169    0.498687    11.00000   -1.20000
AFIX   0
C74   1    0.427309    0.011430    0.428468    11.00000    0.02106    0.02333 =
         0.02030   -0.00294    0.00538   -0.00142
C83   1    0.835111    0.230038    0.414112    11.00000    0.01917    0.01170 =
         0.01708    0.00125    0.00572    0.00213
AFIX  43
H83   2    0.798934    0.255114    0.390499    11.00000   -1.20000
AFIX   0
C7    1    0.723298    0.188921    0.620389    11.00000    0.02278    0.02420 =
         0.01669   -0.00033    0.00629   -0.00203
AFIX  43
H7    2    0.722450    0.194488    0.659658    11.00000   -1.20000
AFIX   0
C49   1    0.719139    0.431103    0.330803    11.00000    0.03348    0.01686 =
         0.02518    0.00005    0.01069    0.00358
AFIX  43
H49   2    0.715625    0.391906    0.319723    11.00000   -1.20000
AFIX   0
C45   1    0.978149    0.302791    0.575145    11.00000    0.02479    0.01317 =
         0.02648    0.00014    0.00598   -0.00012
AFIX  43
H45   2    0.957140    0.268908    0.555185    11.00000   -1.20000
AFIX   0
C22   1    0.621985    0.517550    0.559073    11.00000    0.02645    0.01361 =
         0.03267   -0.00089    0.00864    0.00140
C25   1    0.679397    0.556334    0.545475    11.00000    0.02886    0.01815 =
         0.04193   -0.00477    0.00756   -0.00115
C19   1    0.520179    0.440341    0.581621    11.00000    0.02460    0.02222 =
         0.03267   -0.00695    0.01148   -0.00323
AFIX  43
H19   2    0.484815    0.414333    0.589483    11.00000   -1.20000
AFIX   0
C53   1    0.761404    0.503947    0.403815    11.00000    0.03529    0.01720 =
         0.02204    0.00304    0.00716   -0.00135
AFIX  43
H53   2    0.786015    0.515031    0.442703    11.00000   -1.20000
AFIX   0
C71   1    0.547447   -0.048092    0.409440    11.00000    0.02119    0.02115 =
         0.02678    0.00033    0.00962   -0.00215
AFIX  43
H71   2    0.588342   -0.068819    0.402741    11.00000   -1.20000
AFIX   0
C20   1    0.534966    0.491541    0.611974    11.00000    0.02983    0.02875 =
         0.03830   -0.01333    0.01279   -0.00246
C23   1    0.606617    0.466522    0.528094    11.00000    0.02631    0.01635 =
         0.02891    0.00108    0.00952    0.00399
AFIX  43
H23   2    0.630530    0.458620    0.498480    11.00000   -1.20000
AFIX   0
C64   1    0.774596    0.050981    0.202709    11.00000    0.02622    0.02296 =
         0.02711    0.00153    0.01169    0.00149
C67   1    0.739751   -0.027707    0.278303    11.00000    0.03207    0.01590 =
         0.02354    0.00189    0.01016    0.00239
AFIX  43
H67   2    0.727529   -0.054927    0.303837    11.00000   -1.20000
AFIX   0
C94   1    1.021995    0.369241    0.398079    11.00000    0.02526    0.01586 =
         0.03213    0.00424    0.00982   -0.00561
C97   1    0.899496    0.306382    0.336505    11.00000    0.02557    0.02630 =
         0.02964    0.00419    0.00627   -0.00788
AFIX  43
H97   2    0.856689    0.285660    0.315093    11.00000   -1.20000
AFIX   0
F17   4    0.690381    0.458797    0.193151    11.00000    0.10778    0.18132 =
         0.03141   -0.01587    0.00963    0.08770
C42   1    1.039501    0.400065    0.635012    11.00000    0.02636    0.01604 =
         0.03809   -0.00373    0.00436   -0.00355
C88   1    1.113746    0.060297    0.528025    11.00000    0.02241    0.01383 =
         0.05113    0.00039    0.01269    0.00222
C27   1    0.382971    0.230776    0.388200    11.00000    0.02423    0.02383 =
         0.03504   -0.00120    0.00594    0.00671
AFIX  43
H27   2    0.416548    0.229944    0.364490    11.00000   -1.20000
AFIX   0
C31   1    0.353942    0.258074    0.476455    11.00000    0.02516    0.01696 =
         0.04372   -0.00232    0.00976    0.00088
AFIX  43
H31   2    0.367244    0.276573    0.513357    11.00000   -1.20000
AFIX   0
C87   1    1.102120    0.032156    0.576075    11.00000    0.02661    0.02120 =
         0.05194    0.01383    0.00573    0.00534
AFIX  43
H87   2    1.137696    0.005206    0.597198    11.00000   -1.20000
AFIX   0
C65   1    0.787990   -0.007273    0.196295    11.00000    0.03391    0.02561 =
         0.02757   -0.00217    0.01464    0.00543
AFIX  43
H65   2    0.809059   -0.020057    0.166437    11.00000   -1.20000
AFIX   0
C85   1    0.985896    0.084099    0.561909    11.00000    0.01889    0.02293 =
         0.04157    0.01082    0.01062    0.00139
AFIX  43
H85   2    0.942738    0.092604    0.574459    11.00000   -1.20000
AFIX   0
C72   1    0.489751   -0.076951    0.423178    11.00000    0.02799    0.01911 =
         0.02288   -0.00051    0.00776   -0.00520
C76   1    0.359753    0.043324    0.434850    11.00000    0.02469    0.03335 =
         0.03059   -0.00029    0.01044   -0.00212
F9    4    0.240475    0.183013    0.526082    11.00000    0.16742    0.03609 =
         0.16060    0.00312    0.12940   -0.00032
C52   1    0.731389    0.545592    0.361369    11.00000    0.04163    0.01560 =
         0.03142    0.00597    0.01259    0.00191
C77   1    0.491835   -0.141572    0.427898    11.00000    0.03427    0.02224 =
         0.04243    0.00611    0.01402   -0.00606
C30   1    0.284696    0.231211    0.456927    11.00000    0.02496    0.01857 =
         0.06089   -0.00544    0.01454    0.00018
C21   1    0.586568    0.530147    0.601276    11.00000    0.02981    0.01968 =
         0.03872   -0.00958    0.00824    0.00057
AFIX  43
H21   2    0.597294    0.564814    0.622810    11.00000   -1.20000
AFIX   0
C44   1    1.046078    0.300155    0.617311    11.00000    0.02879    0.01610 =
         0.03541    0.00226    0.00292    0.00061
C98   1    1.086728    0.403612    0.433254    11.00000    0.03239    0.03080 =
         0.03520    0.00519    0.00635   -0.01182
C96   1    0.925184    0.352954    0.311023    11.00000    0.03491    0.03077 =
         0.03096    0.01274    0.00590   -0.00868
C91   1    1.183502    0.047208    0.510656    11.00000    0.02780    0.01371 =
         0.06749    0.00595    0.01839    0.00618
C95   1    0.986184    0.384542    0.341561    11.00000    0.03093    0.02164 =
         0.03653    0.00928    0.00917   -0.00601
AFIX  43
H95   2    1.003195    0.416338    0.323867    11.00000   -1.20000
AFIX   0
C68   1    0.791766    0.092888    0.161273    11.00000    0.04649    0.02732 =
         0.02902   -0.00013    0.02066   -0.00336
C50   1    0.689063    0.472499    0.289955    11.00000    0.04922    0.02563 =
         0.02397    0.00351    0.01165    0.00487
C66   1    0.769997   -0.045807    0.234191    11.00000    0.03847    0.02176 =
         0.03086    0.00051    0.01461    0.00743
C69   1    0.783074   -0.109066    0.228379    11.00000    0.08066    0.02684 =
         0.04049    0.00425    0.02707    0.01886
PART 1
F36A  4    0.877616    0.315223    0.212744    41.00000    0.07424    0.06550 =
         0.02837   -0.00032   -0.00236    0.00456
PART 0
F18   4    0.623298    0.403453    0.225110    11.00000    0.31479    0.05390 =
         0.05771    0.00972   -0.08142   -0.05200
F7    4    0.162178    0.227500    0.464433    11.00000    0.03835    0.20763 =
         0.13599   -0.05272    0.04496   -0.03297
C54   1    0.732269    0.607923    0.378120    11.00000    0.05640    0.02074 =
         0.03464    0.00887    0.00407    0.00146
C28   1    0.313024    0.204751    0.368786    11.00000    0.02606    0.02402 =
         0.04788   -0.00961    0.00359    0.00230
C47   1    1.069229    0.453547    0.668023    11.00000    0.03528    0.02620 =
         0.04976   -0.00464    0.00017   -0.00092
C51   1    0.695264    0.530286    0.304995    11.00000    0.05266    0.02171 =
         0.02529    0.01109    0.00925    0.00925
AFIX  43
H51   2    0.674777    0.558759    0.276635    11.00000   -1.20000
AFIX   0
C46   1    1.086768    0.243780    0.628760    11.00000    0.03270    0.02427 =
         0.05150    0.00227   -0.00435    0.00299
C43   1    1.077732    0.349030    0.648522    11.00000    0.02234    0.02523 =
         0.04062    0.00062   -0.00421   -0.00244
AFIX  43
H43   2    1.124029    0.347091    0.678037    11.00000   -1.20000
AFIX   0
C86   1    1.038269    0.043923    0.592601    11.00000    0.02845    0.02997 =
         0.05257    0.02204    0.00909    0.00414
C55   1    0.647758    0.456141    0.229330    11.00000    0.08523    0.03135 =
         0.02689    0.00082    0.00325    0.01290
C29   1    0.264279    0.204803    0.402365    11.00000    0.02235    0.02154 =
         0.06748   -0.01263    0.00394   -0.00234
AFIX  43
H29   2    0.216655    0.186948    0.388674    11.00000   -1.20000
AFIX   0
C32   1    0.291278    0.178959    0.309010    11.00000    0.03480    0.04390 =
         0.05654   -0.01395   -0.00368    0.00258
C1    1    0.598318    0.183461    0.207439    11.00000    0.05144    0.04170 =
         0.03284   -0.00725    0.00895    0.00297
C33   1    0.233114    0.229664    0.495226    11.00000    0.03545    0.02444 =
         0.09654   -0.02059    0.03374   -0.01604
C2    1    0.545926    0.154744    0.298426    11.00000    0.03967    0.03575 =
         0.02922   -0.00050   -0.00504   -0.00257
C24   1    0.496505    0.504460    0.659077    11.00000    0.04923    0.03409 =
         0.07970   -0.02651    0.03253   -0.01383
PART 1
F47A  4    0.751551    0.086907    0.108601    31.00000    0.17912    0.07788 =
         0.02952    0.02110   -0.01908   -0.08531
PART 0
C90   1    1.024390    0.015451    0.645308    11.00000    0.03890    0.06513 =
         0.06651    0.04395    0.01562    0.01501
PART 1
C99B  1    0.889827    0.363670    0.251119    41.00000    0.05227    0.03464 =
         0.03011    0.01616    0.00406   -0.00447
F34A  4    0.925810    0.397952    0.223707    41.00000    0.10533    0.13736 =
         0.04428    0.05114   -0.00966   -0.07557
F48A  4    0.862936    0.089450    0.160228    31.00000    0.07184    0.08853 =
         0.13723    0.06124    0.07965    0.02655
PART 0
C04F  1    0.455022    0.309737    0.231818    11.00000    0.11546    0.07748 =
         0.12794    0.03249    0.04973    0.02302
AFIX  13
H04F  2    0.504277    0.310658    0.222376    11.00000   -1.20000
AFIX   0
PART 2
RH1A  7    0.600361    0.305409    0.314474   -21.00000    0.02749    0.02094 =
         0.01904   -0.00253    0.00438    0.00222
F48   4    0.814569    0.070555    0.120299   -31.00000    0.18452    0.04445 =
         0.07969    0.00259    0.11069    0.00288
F47   4    0.728199    0.119859    0.132161   -31.00000    0.07053    0.13027 =
         0.07882    0.08249    0.03434    0.03141
F46   4    0.831769    0.132548    0.183617   -31.00000    0.14231    0.05763 =
         0.04718    0.00128    0.02141   -0.06683
F36   4    0.899407    0.343096    0.212792   -41.00000    0.06730    0.08593 =
         0.03707    0.00944    0.01131    0.02287
C99   1    0.877043    0.376293    0.248329   -41.00000    0.05227    0.03464 =
         0.03011    0.01616    0.00406   -0.00447
F34   4    0.889909    0.427821    0.241246   -41.00000    0.11840    0.04285 =
         0.04938    0.03007   -0.03003   -0.01889
HKLF 4


REM  Prelim_a.res in P2(1)/c
REM R1 =  0.0712 for   14360 Fo > 4sig(Fo)  and  0.0913 for all   18396 data
REM   1459 parameters refined using    117 restraints

END

WGHT      0.1132     40.3616

REM Highest difference peak  1.875,  deepest hole -1.675,  1-sigma level  0.127
Q1    1   0.5777  0.2015  0.3029  11.00000  0.05    1.88
Q2    1   0.6596  0.2019  0.2732  11.00000  0.05    1.53
Q3    1   0.6209  0.2019  0.3292  11.00000  0.05    1.50
Q4    1   0.3262  0.3267  0.1512  11.00000  0.05    1.47
Q5    1   0.7218  0.2352  0.2699  11.00000  0.05    1.32
Q6    1   0.6262  0.2014  0.2488  11.00000  0.05    1.31
Q7    1   0.5715  0.2030  0.2580  11.00000  0.05    1.12
Q8    1   0.1796  0.2678  0.4838  11.00000  0.05    1.00
Q9    1   0.4360  0.3560  0.2402  11.00000  0.05    0.98
Q10   1   0.4772  0.5776  0.6436  11.00000  0.05    0.98
Q11   1   0.4235  0.4791  0.6374  11.00000  0.05    0.96
Q12   1   0.4060  0.4998  0.6123  11.00000  0.05    0.93
Q13   1   0.3906  0.2811  0.1774  11.00000  0.05    0.92
Q14   1   0.6784  0.4210  0.2086  11.00000  0.05    0.90
Q15   1   0.3309  0.2082  0.2695  11.00000  0.05    0.87
Q16   1   0.5500  0.1426  0.2459  11.00000  0.05    0.86
Q17   1   0.8468  0.4001  0.2358  11.00000  0.05    0.83
Q18   1   1.1389  0.2403  0.6162  11.00000  0.05    0.79
Q19   1   0.5865  0.4227  0.2401  11.00000  0.05    0.79
Q20   1   0.6415  0.3960  0.2196  11.00000  0.05    0.76
Q21   1   0.4993  0.4991  0.6983  11.00000  0.05    0.75
Q22   1   0.7145  0.6235  0.4135  11.00000  0.05    0.74
Q23   1   0.3020  0.0115  0.4279  11.00000  0.05    0.71
Q24   1   0.5314  0.1948  0.1278  11.00000  0.05    0.65
Q25   1   0.7385  0.1733  0.4795  11.00000  0.05    0.58
Q26   1   0.7000  0.2730  0.2985  11.00000  0.05    0.57
Q27   1   0.2656  0.2044  0.5458  11.00000  0.05    0.56
Q28   1   0.2769  0.2439  0.5642  11.00000  0.05    0.55
Q29   1   0.5016  0.1663  0.3194  11.00000  0.05    0.55
Q30   1   0.7692  0.1810  0.4424  11.00000  0.05    0.55
Q31   1   1.0903  0.4450  0.7217  11.00000  0.05    0.53
Q32   1   0.2322  0.1878  0.2814  11.00000  0.05    0.52
Q33   1   0.7716  0.6153  0.3837  11.00000  0.05    0.52
Q34   1   1.2333  0.0246  0.5434  11.00000  0.05    0.52
Q35   1   1.1021  0.2416  0.6892  11.00000  0.05    0.51
Q36   1   0.7416  0.4796  0.2094  11.00000  0.05    0.51
Q37   1   0.9496  0.3614  0.2194  11.00000  0.05    0.51
Q38   1   0.6391  0.4989  0.2010  11.00000  0.05    0.51
Q39   1   0.4232  0.3167  0.2622  11.00000  0.05    0.50
Q40   1   0.7644  0.1325  0.5774  11.00000  0.05    0.50
;
_shelx_res_checksum                32376
_shelx_hkl_file
;
   2   0   0 115.931 11.6589   2
   2   0   0 145.702 11.7409   1
   2   0   0 141.950 11.7475   8
   2   0   0 141.078 11.7466   8
  -2   0   0 110.779 11.7421   7
  -2   0   0 117.903 11.7003   8
  -2   0   0 140.314 11.7591   8
   2   0   0 147.779 11.7401   1
  -2   0   0 128.026 11.7796   5
  -2   0   0 142.104 11.7434   1
  -2   0   0 116.357 11.6537   2
  -2   0   0 129.824 11.8022   4
   2   0   0 115.619 11.7377   7
   2   0   0 132.033 11.8378   4
   2   0   0 129.707 11.7931   5
  -2   0   0 138.747 11.7209   1
   3   0   0 1806.90 162.313   5
  -3   0   0 1601.43 162.007   2
  -3   0   0 1782.84 161.919   4
  -3   0   0 1952.62 161.806   1
   3   0   0 1992.25 161.820   1
   3   0   0 1559.69 161.935   2
   3   0   0 1640.95 161.893   4
   3   0   0 1981.16 161.812   1
   3   0   0 1973.75 162.109   8
  -3   0   0 1576.54 161.798   7
  -3   0   0 2009.48 161.823   8
  -3   0   0 1923.48 161.821   8
   3   0   0 1582.02 161.807   7
   3   0   0 1992.26 161.823   8
  -3   0   0 2018.66 161.818   1
  -3   0   0 1755.07 162.323   5
  -4   0   0 1227.92 102.746   1
   4   0   0 1266.28 102.768   8
  -4   0   0 1166.48 102.733   1
  -4   0   0 1066.87 102.881   4
  -4   0   0 1152.08 102.741   8
  -4   0   0 1209.81 102.758   8
   4   0   0 1135.77 102.795   7
  -4   0   0 1049.24 102.639   2
   4   0   0 1292.34 102.778   1
   4   0   0 1217.05 102.634   2
   4   0   0 1054.05 102.877   4
   4   0   0 1090.24 102.826   5
   4   0   0 1225.49 102.734   1
  -4   0   0 1076.99 102.818   5
  -4   0   0 1043.88 102.714   6
  -4   0   0 1122.40 102.757   7
   4   0   0 1246.43 102.787   8
  -5   0   0 418.345 33.7678   8
   5   0   0 328.244 33.8592   4
  -5   0   0 330.857 33.5784   2
   5   0   0 370.629 33.7242   8
   5   0   0 417.013 33.7951   8
   5   0   0 354.684 33.7911   5
   5   0   0 329.367 33.7672   7
   5   0   0 402.749 33.7529   1
  -5   0   0 399.532 33.7528   8
  -5   0   0 340.573 33.9377   4
  -5   0   0 414.062 33.8399   7
  -5   0   0 403.468 33.7272   1
  -5   0   0 404.049 33.7467   1
  -5   0   0 343.076 33.6941   6
   5   0   0 402.652 33.7207   1
  -5   0   0 363.564 33.8578   5
  -6   0   0 1681.51 140.276   1
  -6   0   0 1603.21 140.277   8
  -6   0   0 1613.26 140.278   1
  -6   0   0 1636.45 140.330   7
   6   0   0 1717.39 140.280   1
   6   0   0 1331.75 140.277   7
  -6   0   0 1462.29 140.243   6
  -6   0   0 1461.91 140.476   4
   6   0   0 1793.32 140.331   1
   6   0   0 1561.50 140.407   5
   6   0   0 1449.46 140.467   4
  -6   0   0 1522.44 140.424   5
   6   0   0 1615.27 140.297   8
  -6   0   0 1597.09 140.285   8
   6   0   0 1659.46 140.112   2
  -6   0   0 1412.12 140.120   2
   6   0   0 1694.18 140.293   8
   7   0   0 41.9504 4.52012   8
  -7   0   0 41.1519 4.90213   7
  -7   0   0 37.7515 4.39251   2
  -7   0   0 44.1925 5.39893   4
  -7   0   0 39.8750 4.55818   6
   7   0   0 31.9100 4.18857   2
   7   0   0 39.1104 4.84302   4
   7   0   0 39.5715 4.61270   5
   7   0   0 38.6389 4.63545   1
  -7   0   0 41.6713 4.76251   8
  -7   0   0 38.5363 5.06343   5
  -7   0   0 42.9446 4.68662   1
   7   0   0 37.0852 5.01621   7
   7   0   0 46.5180 4.87962   1
   7   0   0 45.9272 5.00504   8
  -7   0   0 42.0064 4.71895   1
  -7   0   0 46.7080 4.88793   8
   8   0   0 2.47290 2.41150   5
  -8   0   0 -1.3207 1.79256   1
  -8   0   0 -0.8322 1.63393   6
  -8   0   0 -3.2387 1.78858   8
   8   0   0 -4.1444 1.88986   1
   8   0   0 -3.3615 2.12125   8
  -8   0   0 -0.2613 1.72538   1
   8   0   0 2.97733 2.80163   4
  -8   0   0 3.02208 1.50677   2
   8   0   0 -2.0178 1.89486   8
  -8   0   0 3.12976 2.34196   5
   8   0   0 0.65084 2.28376   7
  -8   0   0 2.15165 2.17125   7
  -8   0   0 -0.3927 1.93516   8
  -8   0   0 1.63994 2.67938   4
   8   0   0 -2.9835 1.78563   1
  -9   0   0 1213.91 102.239   7
   9   0   0 1108.05 102.177   1
   9   0   0 1101.90 102.515   4
   9   0   0 1074.89 102.321   5
   9   0   0 1217.97 102.177   1
   9   0   0 1074.04 102.151   8
  -9   0   0 1144.46 102.191   8
  -9   0   0 1110.43 102.154   1
  -9   0   0 1201.53 102.017   2
  -9   0   0 1207.99 102.477   5
  -9   0   0 1115.02 102.141   6
   9   0   0 1266.21 102.297   8
  -9   0   0 1055.46 102.138   8
  -9   0   0 1177.03 102.560   4
  -9   0   0 1117.81 102.136   1
   9   0   0 1094.97 102.297   7
 -10   0   0 26.0765 4.28487   5
 -10   0   0 26.5885 3.71303   2
 -10   0   0 25.2882 3.69066   8
  10   0   0 29.2072 4.30618   5
  10   0   0 28.7645 4.37821   7
  10   0   0 23.4214 3.73463   8
  10   0   0 34.9989 4.79148   8
 -10   0   0 23.3638 3.70800   1
 -10   0   0 23.1740 3.49613   6
  10   0   0 27.4417 3.73529   1
 -10   0   0 30.3418 4.25608   7
 -10   0   0 25.1248 3.79034   1
  10   0   0 20.8634 3.74429   1
  10   0   0 29.6011 4.73978   4
 -10   0   0 24.8259 3.76756   8
 -11   0   0 99.7274 12.3982   8
  11   0   0 117.400 12.5336   1
  11   0   0 134.002 13.3493   4
  11   0   0 137.196 12.7802   8
  11   0   0 118.686 12.7100   7
  11   0   0 128.222 12.5634   8
 -11   0   0 123.095 12.4476   1
 -11   0   0 140.470 12.1924   2
 -11   0   0 147.037 13.0652   5
 -11   0   0 136.455 12.4472   6
 -11   0   0 132.453 12.5869   8
  12   0   0 87.3027 10.6289   4
  12   0   0 83.1550 9.81449   1
 -12   0   0 91.8720 9.74210   1
 -12   0   0 107.672 9.46365   2
  12   0   0 88.3324 10.0410   7
 -12   0   0 78.9807 9.68854   8
  12   0   0 92.7299 9.84495   8
 -12   0   0 101.168 9.73739   6
 -12   0   0 95.1199 9.89883   8
  12   0   0 91.2940 10.0140   8
 -12   0   0 106.573 10.0806   5
  13   0   0 217.600 21.5420   7
 -13   0   0 261.705 21.9568   5
  13   0   0 220.422 21.3104   8
 -13   0   0 191.977 21.1908   8
 -13   0   0 260.357 21.0639   2
 -13   0   0 207.873 21.2498   1
 -13   0   0 231.483 21.3048   8
  13   0   0 262.166 22.3110   4
  13   0   0 220.468 21.4719   8
  13   0   0 211.417 21.2918   1
  14   0   0 65.3351 8.05494   7
  14   0   0 64.3856 8.74969   4
 -14   0   0 61.3765 7.71968   8
 -14   0   0 65.6845 7.57842   1
 -14   0   0 64.0718 7.69830   5
  14   0   0 60.3234 8.00575   8
 -14   0   0 65.7455 7.73248   8
  14   0   0 63.4125 7.75141   8
 -14   0   0 78.9015 7.16137   2
  14   0   0 55.2310 7.71521   1
  15   0   0 7.94479 3.06278   1
 -15   0   0 3.43452 2.33256   2
 -15   0   0 4.78424 2.85669   8
  15   0   0 3.94136 3.27618   8
  15   0   0 2.05217 4.21531   4
 -15   0   0 5.81855 2.66715   1
  15   0   0 2.56129 3.23786   7
 -15   0   0 7.11802 3.85678   5
 -16   0   0 98.1785 10.0854   5
  16   0   0 67.9890 9.33841   8
 -16   0   0 65.3075 9.01410   8
  16   0   0 94.5883 10.6998   4
  16   0   0 77.4611 9.67776   7
 -16   0   0 92.1095 8.55783   2
 -16   0   0 67.1909 8.81964   1
  16   0   0 64.8742 9.03544   1
  17   0   0 83.0486 10.5772   7
  17   0   0 89.6629 11.4079   4
 -17   0   0 111.443 9.51360   2
  17   0   0 72.4923 9.79755   1
 -17   0   0 102.185 10.9970   5
 -17   0   0 81.7130 9.60049   8
  17   0   0 77.9733 10.2871   8
 -17   0   0 76.0483 9.72481   1
  18   0   0 -0.5796 4.78681   4
  18   0   0 -3.3763 3.93570   7
  18   0   0 3.75719 3.76013   8
  18   0   0 -1.9876 3.30648   1
 -18   0   0 -2.7414 4.22929   5
 -18   0   0 -3.5760 3.02628   8
 -18   0   0 -0.4512 3.05208   1
 -18   0   0 -1.0011 2.39160   2
  19   0   0 -8.8985 2.98586   1
  19   0   0 4.04920 4.96287   4
 -19   0   0 -1.6719 3.98215   5
  19   0   0 4.21107 4.27221   7
 -19   0   0 -3.3824 2.83105   1
  20   0   0 3.58090 4.36540   7
  20   0   0 3.49061 3.95247   1
 -20   0   0 4.50377 3.42087   1
 -20   0   0 8.03055 5.08301   5
  20   0   0 17.5215 6.12554   4
  21   0   0 5.65006 4.55381   7
 -21   0   0 5.46813 5.07361   5
  21   0   0 -3.0665 3.61936   1
 -21   0   0 4.52113 3.65941   1
  21   0   0 9.83284 5.88080   4
  -1  -1   0 57.8329 5.26071   4
  -1  -1   0 58.8826 5.20296   8
   1  -1   0 53.1288 5.20018   2
   1  -1   0 53.3719 5.22352   5
  -1  -1   0 54.7928 5.21017   6
   1  -1   0 60.7725 5.20795   1
   1  -1   0 67.1073 5.21501   8
  -1   1   0 62.3908 5.22781   8
  -1   1   0 59.9829 5.19518   1
   1   1   0 63.3255 5.20898   8
   1   1   0 53.2018 5.16410   5
  -1   1   0 54.5431 5.26963   4
  -1   1   0 55.3411 5.28554   7
   1   1   0 59.2335 5.18460   1
   1   1   0 51.4964 5.20681   6
  -1   1   0 51.2432 5.21311   5
   2  -1   0 850.818 73.3258   1
  -2  -1   0 774.518 73.3845   4
   2  -1   0 895.008 73.3289   1
  -2  -1   0 853.041 73.3213   1
   2  -1   0 786.305 73.4033   4
   2  -1   0 734.300 73.2964   2
  -2  -1   0 744.020 73.3232   5
   2  -1   0 757.288 73.3634   5
  -2  -1   0 855.247 73.3148   1
  -2  -1   0 886.472 73.3431   7
   2  -1   0 836.360 73.3312   8
  -2  -1   0 871.631 73.3256   8
   2  -1   0 716.684 73.3514   7
   2  -1   0 908.797 73.3430   8
  -2  -1   0 871.373 73.3361   8
  -2  -1   0 723.762 73.3229   6
  -2   1   0 799.300 73.3840   5
   2   1   0 867.531 73.3255   1
   2   1   0 864.324 73.3173   1
  -2   1   0 749.482 73.3616   7
   2   1   0 790.928 73.3965   4
   2   1   0 773.274 73.3286   5
  -2   1   0 878.463 73.3375   8
  -2   1   0 925.590 73.3474   8
  -2   1   0 724.126 73.2951   2
  -2   1   0 751.437 73.3857   4
  -2   1   0 890.535 73.3321   1
   2   1   0 897.428 73.3305   8
   2   1   0 890.406 73.3444   8
   2   1   0 870.130 73.3348   7
   2   1   0 768.711 73.3317   6
  -2   1   0 899.905 73.3350   1
  -3  -1   0 35.8515 3.76225   1
  -3  -1   0 35.9553 3.82551   8
   3  -1   0 43.1975 3.84556   8
   3  -1   0 35.0055 4.10395   4
  -3  -1   0 35.6270 4.11248   4
   3  -1   0 29.9036 3.91763   7
   3  -1   0 33.8070 3.75151   1
  -3  -1   0 35.7219 3.75038   6
   3  -1   0 40.8594 3.82269   8
  -3  -1   0 35.2010 3.90280   7
  -3  -1   0 36.2219 3.71422   1
   3  -1   0 30.8603 3.60513   2
   3  -1   0 36.8172 3.94401   5
  -3  -1   0 41.8186 3.79402   8
  -3  -1   0 38.6348 3.80943   5
   3  -1   0 35.9368 3.76804   1
  -3   1   0 38.9566 3.72643   1
  -3   1   0 36.5339 4.00504   5
   3   1   0 35.1832 3.78229   6
   3   1   0 37.1557 3.85643   8
  -3   1   0 43.0536 3.79006   8
   3   1   0 36.6373 3.78191   1
   3   1   0 43.7184 3.82222   8
  -3   1   0 35.9575 3.76858   1
   3   1   0 32.0287 4.07238   4
   3   1   0 34.7471 3.75221   1
  -3   1   0 37.6285 3.83477   8
   3   1   0 34.1425 3.80593   5
  -3   1   0 38.3413 4.09934   4
  -3   1   0 30.1856 3.98637   7
  -3   1   0 30.1062 3.60495   2
   3   1   0 37.9877 3.78303   7
  -4  -1   0 -2.4914 1.38055   8
   4  -1   0 -0.5394 1.22360   1
   4  -1   0 0.44066 1.55252   4
  -4  -1   0 0.76253 1.21729   1
   4  -1   0 -3.3161 1.62968   5
   4  -1   0 0.92314 1.32447   1
   4  -1   0 0.08056 1.34237   8
   4  -1   0 -0.7081 1.00162   2
  -4  -1   0 -1.3851 1.61930   7
  -4  -1   0 0.83975 0.90743   2
  -4  -1   0 -1.2222 1.53397   4
  -4  -1   0 -3.4812 1.49715   5
  -4  -1   0 -1.4684 1.34187   6
   4  -1   0 -1.9118 1.70397   7
  -4  -1   0 -0.4114 1.29852   1
  -4  -1   0 -0.0049 1.23825   8
   4  -1   0 2.17849 1.20889   8
  -4   1   0 -1.2506 1.38052   1
   4   1   0 0.57162 1.60760   5
  -4   1   0 -1.0594 1.15240   2
  -4   1   0 -1.4374 1.72985   7
   4   1   0 -2.3305 1.46061   6
   4   1   0 0.49170 1.25424   1
   4   1   0 -0.6814 1.40069   8
  -4   1   0 -0.7943 1.22465   1
  -4   1   0 0.22021 1.01544   8
   4   1   0 -0.0356 1.28215   8
  -4   1   0 -2.7508 1.79363   4
   4   1   0 -2.1638 1.76463   7
   4   1   0 3.26523 1.39409   1
   4   1   0 -3.6738 1.91702   4
  -4   1   0 -1.1369 1.71139   5
  -4   1   0 -1.6575 1.43929   8
   5  -1   0 89.1393 7.94875   8
   5  -1   0 72.5921 7.58080   2
   5  -1   0 95.4085 7.90500   8
   5  -1   0 72.3916 8.21212   4
  -5  -1   0 79.8040 7.85529   8
  -5  -1   0 76.9111 7.50480   2
  -5  -1   0 87.7882 7.80201   1
  -5  -1   0 89.8524 7.86343   8
  -5  -1   0 74.2935 7.78754   6
  -5  -1   0 80.1546 7.84188   7
   5  -1   0 97.3045 7.86043   1
   5  -1   0 92.0471 7.87753   1
  -5  -1   0 93.9965 7.81683   1
   5  -1   0 77.4088 8.03591   5
   5  -1   0 71.3075 7.98422   7
  -5  -1   0 83.7244 7.96746   5
  -5  -1   0 75.8912 8.24566   4
  -5   1   0 70.9745 7.66908   8
   5   1   0 90.9444 7.87711   1
   5   1   0 73.1898 7.90741   5
  -5   1   0 95.4864 7.81988   1
   5   1   0 93.5428 8.00883   8
   5   1   0 72.4486 8.22191   4
  -5   1   0 64.7510 8.14126   4
  -5   1   0 82.4293 8.09835   5
  -5   1   0 68.5275 7.95953   7
  -5   1   0 87.3487 7.90971   8
   5   1   0 69.7569 7.87734   7
   5   1   0 68.8093 7.66541   8
  -5   1   0 90.5192 7.84312   1
  -5   1   0 71.5142 7.60504   2
   5   1   0 94.2457 7.83005   1
   6  -1   0 7.09822 2.61705   4
  -6  -1   0 2.80631 1.76131   1
  -6  -1   0 6.53662 1.41155   2
  -6  -1   0 6.77015 2.45793   4
   6  -1   0 6.74451 1.48736   2
   6  -1   0 7.95486 1.82887   1
  -6  -1   0 4.89860 1.88402   8
  -6  -1   0 4.51567 1.81828   1
   6  -1   0 9.89780 2.39921   5
  -6  -1   0 4.95850 2.11316   7
   6  -1   0 4.76594 2.23194   7
   6  -1   0 5.54023 2.01625   8
  -6  -1   0 4.05053 1.79164   8
  -6  -1   0 6.84038 2.21323   5
  -6  -1   0 8.10271 1.81507   6
   6  -1   0 8.61600 1.96984   8
   6  -1   0 4.53745 1.91856   1
   6   1   0 1.81461 2.05628   8
  -6   1   0 6.45260 2.48119   4
   6   1   0 8.79097 2.41122   7
   6   1   0 8.57029 1.99794   1
   6   1   0 6.18687 2.13547   4
   6   1   0 8.57062 1.82821   5
   6   1   0 4.36804 1.80167   1
  -6   1   0 8.57941 2.36457   7
  -6   1   0 3.23039 1.57872   8
  -6   1   0 7.41497 1.92734   1
   6   1   0 5.53667 1.83530   8
  -6   1   0 6.33266 2.23062   5
  -6   1   0 5.31169 1.64748   2
  -6   1   0 3.28860 1.67280   8
  -6   1   0 6.90594 1.82346   1
  -7  -1   0 46.9146 5.16456   6
  -7  -1   0 47.0324 5.26515   8
   7  -1   0 43.8971 5.53622   7
   7  -1   0 51.2892 5.45134   8
   7  -1   0 40.5523 5.85827   4
  -7  -1   0 44.8656 5.83747   4
   7  -1   0 51.8190 5.24737   1
   7  -1   0 52.4660 4.93815   2
   7  -1   0 50.8777 5.27289   1
   7  -1   0 51.9624 5.56056   5
  -7  -1   0 42.8090 5.14644   1
   7  -1   0 41.2437 5.21041   8
  -7  -1   0 45.5325 5.24428   7
  -7  -1   0 47.0816 5.48504   5
  -7  -1   0 44.9781 4.83800   2
  -7  -1   0 49.0748 5.23879   1
  -7  -1   0 47.1142 5.25567   8
   7   1   0 45.8306 5.27158   8
  -7   1   0 48.4055 5.20033   1
  -7   1   0 54.6149 5.71559   5
   7   1   0 45.8205 5.08178   5
  -7   1   0 46.9316 5.02550   2
   7   1   0 43.3479 5.38846   8
   7   1   0 50.2096 5.20795   1
  -7   1   0 46.6584 5.37695   8
  -7   1   0 48.3241 5.26068   8
  -7   1   0 37.3284 5.40170   7
  -7   1   0 48.5026 5.27665   1
   7   1   0 47.7608 5.87480   4
   7   1   0 35.9603 5.41545   7
  -7   1   0 44.7284 5.76370   4
   7   1   0 50.8317 5.45445   1
   8  -1   0 320.883 25.4465   1
  -8  -1   0 266.971 25.3420   1
  -8  -1   0 302.836 25.5094   7
   8  -1   0 297.874 25.6849   5
   8  -1   0 249.790 25.7493   4
   8  -1   0 242.837 25.4857   7
  -8  -1   0 293.406 25.4397   8
  -8  -1   0 267.843 25.3772   6
   8  -1   0 279.272 25.3976   1
   8  -1   0 241.531 25.1103   2
  -8  -1   0 285.646 25.5523   5
  -8  -1   0 271.722 25.3902   8
   8  -1   0 305.580 25.4722   8
  -8  -1   0 284.090 25.3825   1
  -8  -1   0 285.775 25.8334   4
   8  -1   0 295.381 25.4960   8
  -8  -1   0 271.515 25.1383   2
  -8   1   0 247.300 25.4270   7
  -8   1   0 269.900 25.3731   6
   8   1   0 286.493 25.5784   5
  -8   1   0 273.032 25.6769   4
   8   1   0 281.886 25.4231   1
  -8   1   0 279.254 25.3652   1
  -8   1   0 279.711 25.3736   1
   8   1   0 292.123 25.5351   8
   8   1   0 241.089 25.4526   7
   8   1   0 273.079 25.8084   4
  -8   1   0 290.924 25.7282   5
  -8   1   0 274.791 25.4153   8
   8   1   0 316.736 25.4666   8
   8   1   0 303.518 25.3791   1
  -8   1   0 269.269 25.1959   2
  -8   1   0 288.014 25.4302   8
   9  -1   0 -1.3665 1.88736   1
   9  -1   0 2.48458 2.56313   7
   9  -1   0 1.91398 1.98172   5
  -9  -1   0 0.30541 2.14957   4
  -9  -1   0 -1.9317 2.26556   7
   9  -1   0 -0.2179 1.46264   2
   9  -1   0 -4.2033 1.69067   1
  -9  -1   0 1.66881 2.52609   5
  -9  -1   0 -0.2047 1.95180   8
   9  -1   0 -1.3903 2.12890   4
  -9  -1   0 -2.1911 1.74099   1
  -9  -1   0 1.12379 1.41316   2
  -9  -1   0 -0.8883 1.97938   8
   9  -1   0 -3.2078 1.95661   8
  -9  -1   0 0.38398 1.82990   6
  -9  -1   0 -1.0156 1.96258   1
   9  -1   0 0.18572 2.29376   8
  -9   1   0 -0.0807 1.97112   1
  -9   1   0 -1.5153 1.98264   8
  -9   1   0 -1.0533 1.64366   2
  -9   1   0 -3.3600 1.79574   8
   9   1   0 -1.2568 1.99605   8
  -9   1   0 -4.3623 1.66824   1
   9   1   0 1.80388 2.36984   5
   9   1   0 -4.3339 1.67233   8
  -9   1   0 -0.0610 2.04353   4
  -9   1   0 -2.7090 1.92086   6
   9   1   0 2.96081 2.44554   7
   9   1   0 -1.9771 2.08912   1
  -9   1   0 1.64844 2.29345   7
   9   1   0 1.45843 1.98100   1
   9   1   0 -2.1249 2.79273   4
  -9   1   0 1.81612 2.53235   5
 -10  -1   0 226.640 22.2717   8
 -10  -1   0 222.743 22.2248   8
 -10  -1   0 265.680 22.6672   5
  10  -1   0 254.263 22.4158   8
  10  -1   0 264.985 22.3417   8
 -10  -1   0 252.620 22.4038   7
  10  -1   0 252.697 22.2516   1
 -10  -1   0 246.233 22.0038   2
  10  -1   0 277.784 22.0052   2
 -10  -1   0 208.330 22.1189   1
  10  -1   0 217.307 22.4336   7
  10  -1   0 218.862 22.2720   1
 -10  -1   0 229.229 22.2161   1
 -10  -1   0 268.138 22.3257   6
  10  -1   0 237.883 22.6727   4
  10   1   0 239.834 22.7780   4
  10   1   0 231.881 22.5088   7
  10   1   0 274.934 22.6520   5
 -10   1   0 228.710 22.2547   8
 -10   1   0 209.456 22.2964   7
 -10   1   0 256.763 22.2308   6
 -10   1   0 273.151 22.7644   5
 -10   1   0 255.470 22.1125   2
 -10   1   0 232.446 22.2435   1
  10   1   0 240.278 22.2509   1
  10   1   0 226.205 22.2793   1
 -10   1   0 241.351 22.3048   8
  10   1   0 229.073 22.2330   8
 -10   1   0 220.695 22.1793   1
  10   1   0 252.354 22.3243   8
 -11  -1   0 523.897 48.2342   8
  11  -1   0 490.115 48.4131   7
 -11  -1   0 475.545 48.1240   8
  11  -1   0 537.039 48.2117   8
 -11  -1   0 587.277 48.5894   5
  11  -1   0 555.611 48.7083   4
 -11  -1   0 589.049 47.9595   2
 -11  -1   0 486.708 48.1229   1
  11  -1   0 546.644 48.3148   8
 -11  -1   0 575.038 48.3008   6
  11  -1   0 515.906 48.2301   1
 -11   1   0 472.391 48.1266   8
  11   1   0 478.302 48.3132   1
  11   1   0 543.278 48.2712   8
 -11   1   0 569.791 48.1855   6
  11   1   0 503.852 48.2976   7
  11   1   0 493.630 48.1970   1
 -11   1   0 608.114 48.0889   2
 -11   1   0 485.391 48.1364   1
  11   1   0 546.500 48.2234   8
 -11   1   0 513.179 48.2170   8
 -11   1   0 630.501 48.7653   5
 -11   1   0 571.826 48.3805   7
  11   1   0 532.589 48.7248   4
  12  -1   0 11.1098 3.03106   8
 -12  -1   0 8.09861 2.87356   8
 -12  -1   0 14.1023 2.35457   2
 -12  -1   0 13.9732 2.91394   8
 -12  -1   0 10.9540 3.04260   5
  12  -1   0 16.1209 3.68681   4
 -12  -1   0 15.9508 3.03771   6
 -12  -1   0 9.40567 2.85190   1
  12  -1   0 14.6708 3.32786   8
  12  -1   0 9.18164 2.79154   1
  12  -1   0 9.87027 3.29244   7
  12   1   0 10.6099 3.87708   4
 -12   1   0 9.77349 2.70728   1
  12   1   0 8.98143 2.94821   8
 -12   1   0 14.9853 2.63287   2
 -12   1   0 10.1604 2.88345   8
  12   1   0 11.1506 3.19144   8
 -12   1   0 18.0485 3.06420   6
 -12   1   0 14.0093 3.11878   8
  12   1   0 9.98074 3.22129   7
  12   1   0 8.43406 2.93356   1
 -12   1   0 10.7201 3.15513   5
  13  -1   0 168.344 15.8873   8
 -13  -1   0 138.842 15.7577   8
  13  -1   0 149.600 15.7879   8
 -13  -1   0 193.083 16.4820   5
  13  -1   0 144.947 15.9895   7
  13  -1   0 160.391 16.6700   4
 -13  -1   0 169.332 15.9097   8
 -13  -1   0 186.233 15.4551   2
 -13  -1   0 156.133 15.7862   1
  13  -1   0 150.834 15.8326   1
  13   1   0 155.686 15.8552   8
  13   1   0 179.924 16.8074   4
  13   1   0 154.015 15.8961   1
 -13   1   0 162.361 15.8322   8
 -13   1   0 161.251 15.8814   8
 -13   1   0 158.675 15.8461   1
 -13   1   0 194.410 15.6264   2
 -13   1   0 193.087 16.6092   5
  13   1   0 158.820 16.0544   8
  13   1   0 157.440 16.2379   7
 -14  -1   0 41.0594 6.20516   8
  14  -1   0 43.5707 6.33740   8
  14  -1   0 39.1785 5.87628   8
 -14  -1   0 54.0627 5.48394   2
 -14  -1   0 48.2142 6.15124   1
  14  -1   0 44.6306 6.62750   7
  14  -1   0 54.4275 7.64256   4
 -14  -1   0 61.7020 7.05351   5
  14  -1   0 44.5144 6.27485   1
 -14  -1   0 52.0461 6.43372   8
  14   1   0 34.3798 5.83349   8
  14   1   0 48.9620 6.63803   4
  14   1   0 33.5079 5.67153   8
 -14   1   0 52.1299 5.68412   2
 -14   1   0 42.3949 5.85544   8
  14   1   0 52.9789 7.05772   7
  14   1   0 42.8367 6.52763   1
 -14   1   0 51.4229 6.33767   5
 -14   1   0 36.1724 5.95024   1
 -14   1   0 34.7730 5.53938   8
  15  -1   0 140.982 16.3021   8
 -15  -1   0 165.538 16.2227   8
  15  -1   0 167.827 17.2676   4
 -15  -1   0 146.171 15.9959   1
  15  -1   0 159.945 16.2431   1
  15  -1   0 177.617 16.8583   7
 -15  -1   0 198.831 15.7162   2
 -15  -1   0 181.852 16.5272   5
  15   1   0 136.804 16.0757   1
  15   1   0 130.280 16.1075   8
  15   1   0 182.673 17.3516   4
 -15   1   0 153.832 16.0945   1
 -15   1   0 198.153 17.1560   5
 -15   1   0 197.596 15.8970   2
 -15   1   0 167.980 16.2925   8
  15   1   0 157.351 16.3717   7
  15   1   0 146.844 16.3188   8
  16  -1   0 50.2759 7.78241   4
 -16  -1   0 64.3319 6.74685   2
  16  -1   0 56.9230 7.81180   1
 -16  -1   0 53.1789 7.44563   8
  16  -1   0 57.9712 7.86538   8
 -16  -1   0 53.9907 7.30312   1
  16  -1   0 54.1006 7.65074   7
 -16  -1   0 70.4793 8.43898   5
  16   1   0 65.9175 8.92869   4
  16   1   0 49.5258 7.12839   8
 -16   1   0 50.4072 7.22710   1
 -16   1   0 77.4043 7.01809   2
 -16   1   0 53.4010 7.41172   5
 -16   1   0 54.8087 7.46332   8
  16   1   0 37.8827 6.70652   1
  16   1   0 58.9825 7.63468   7
  17  -1   0 9.77667 3.58718   1
  17  -1   0 7.52768 3.63133   8
 -17  -1   0 8.18490 3.04238   1
 -17  -1   0 7.18687 4.12035   5
  17  -1   0 6.16686 3.71773   7
  17  -1   0 4.42593 4.77823   4
 -17  -1   0 1.53138 2.33427   2
 -17  -1   0 1.89617 2.88567   8
 -17   1   0 9.39603 4.44730   5
 -17   1   0 4.00870 3.05948   8
 -17   1   0 3.01037 2.80947   1
 -17   1   0 3.31969 2.61811   2
  17   1   0 6.08741 3.97924   7
  17   1   0 6.47734 3.25385   1
  17   1   0 0.24946 3.51736   8
  17   1   0 9.90914 4.06495   4
 -18  -1   0 -3.3400 2.80207   1
 -18  -1   0 0.51916 2.35299   2
  18  -1   0 3.67074 4.06831   7
  18  -1   0 4.38294 4.98452   4
 -18  -1   0 0.15406 3.04472   8
 -18  -1   0 1.19569 3.23811   5
  18  -1   0 2.05303 3.43838   1
  18  -1   0 -2.2479 3.40491   8
 -18   1   0 -0.7322 2.84478   1
  18   1   0 -4.5368 3.07416   1
 -18   1   0 1.50263 3.19217   8
  18   1   0 4.48910 3.73165   8
 -18   1   0 1.08570 4.11147   5
  18   1   0 0.04334 4.81165   4
  18   1   0 -3.7446 3.85331   7
 -18   1   0 1.86561 2.46672   2
  19  -1   0 37.1411 7.54682   4
 -19  -1   0 29.4017 5.26406   1
  19  -1   0 43.3401 6.77627   7
  19  -1   0 30.0236 5.74637   1
 -19  -1   0 34.5499 6.86553   5
  19   1   0 29.5294 7.12850   4
 -19   1   0 35.1551 6.88846   5
  19   1   0 35.5263 6.18498   7
 -19   1   0 33.2760 5.50839   1
  19   1   0 24.9934 5.40532   1
  20  -1   0 3.67800 3.77907   1
 -20  -1   0 -0.3488 3.11212   1
  20  -1   0 -4.4715 4.82125   4
  20  -1   0 -7.4351 4.09461   7
 -20  -1   0 -2.4586 4.40804   5
 -20   1   0 5.83442 3.49146   1
  20   1   0 -1.1387 3.50271   1
 -20   1   0 -5.1710 4.10614   5
  20   1   0 5.39310 4.28742   4
  20   1   0 -4.6038 3.45408   7
  21  -1   0 8.48408 6.08085   4
 -21  -1   0 0.70595 4.36046   5
  21  -1   0 3.73331 3.93560   1
 -21  -1   0 -4.0976 3.22116   1
  21  -1   0 2.88709 4.90712   7
  21   1   0 -2.0559 5.45432   4
 -21   1   0 0.69053 3.37683   1
  21   1   0 -1.5900 3.79880   1
 -21   1   0 -4.2470 4.56230   5
  21   1   0 -0.8872 4.16888   7
   0  -2   0 3.15723 0.76422   8
   0  -2   0 7.18208 0.97071   2
   0  -2   0 6.08077 0.89131   6
   0  -2   0 3.69710 0.76138   1
   0   2   0 7.75992 0.95929   6
   0   2   0 0.43674 0.75214   8
   0   2   0 4.96865 0.87287   8
   0   2   0 4.07897 0.76050   1
   0   2   0 5.80872 0.78199   2
   0   2   0 4.54318 0.73464   1
   1  -2   0 5.35095 1.13761   7
   1  -2   0 5.93430 0.96238   6
  -1  -2   0 7.68384 0.96654   1
   1  -2   0 6.78756 0.90088   1
  -1  -2   0 6.33557 1.13007   4
   1  -2   0 6.83456 1.01690   8
   1  -2   0 5.46897 0.96142   5
  -1  -2   0 6.61794 1.01271   8
   1  -2   0 4.00183 0.97674   2
  -1  -2   0 5.11072 0.84077   2
  -1  -2   0 6.66090 1.05682   6
   1  -2   0 7.78031 1.02590   1
  -1  -2   0 6.53533 0.98740   1
   1   2   0 7.50866 1.02268   8
   1   2   0 5.78015 0.86592   2
  -1   2   0 9.08819 1.16474   1
  -1   2   0 6.66884 0.92036   6
  -1   2   0 7.36217 1.00337   1
  -1   2   0 5.14824 0.93266   8
  -1   2   0 4.09052 0.96402   5
  -1   2   0 5.32536 1.04137   8
   1   2   0 5.61719 1.01549   6
  -1   2   0 6.24900 1.35018   7
   1   2   0 5.33341 0.94631   8
  -1   2   0 5.36527 0.97535   2
   1   2   0 8.43445 1.14453   1
   1   2   0 8.05889 0.93275   5
   1   2   0 7.87685 1.02322   1
   1   2   0 6.30595 1.01814   4
   2  -2   0 26.6349 3.39668   7
  -2  -2   0 27.6866 3.12118   6
  -2  -2   0 33.0970 3.07139   1
  -2  -2   0 30.1378 3.16464   8
   2  -2   0 34.0967 3.18281   8
  -2  -2   0 35.0007 2.80615   3
  -2  -2   0 30.3988 2.94501   5
  -2  -2   0 31.0554 3.34947   4
  -2  -2   0 26.4394 3.01200   1
   2  -2   0 25.7563 3.11925   2
   2  -2   0 32.6380 3.12583   1
   2  -2   0 31.9225 3.10553   1
  -2  -2   0 32.2251 3.09332   8
   2  -2   0 26.4865 3.20114   5
   2  -2   0 30.2339 3.02858   8
  -2   2   0 30.8439 3.09520   1
  -2   2   0 25.0113 3.20724   5
   2   2   0 31.6336 3.08050   7
  -2   2   0 31.0647 2.99427   8
   2   2   0 31.3619 3.15231   8
   2   2   0 25.5160 3.15611   6
  -2   2   0 26.3260 3.37687   7
  -2   2   0 33.4340 3.13973   1
   2   2   0 28.5951 3.02088   5
   2   2   0 29.2708 3.09864   1
  -2   2   0 28.1501 3.40152   4
   2   2   0 27.4244 3.09949   8
   2   2   0 27.3182 3.24221   4
   2   2   0 26.3423 3.05358   1
  -2   2   0 26.3151 3.09343   2
  -2   2   0 29.2770 3.21540   8
   3  -2   0 270.251 22.4741   8
  -3  -2   0 218.657 22.4577   6
   3  -2   0 268.130 22.4730   1
   3  -2   0 279.917 22.5062   8
  -3  -2   0 255.112 22.4670   8
   3  -2   0 292.746 22.4947   1
  -3  -2   0 248.145 22.4307   1
   3  -2   0 212.322 22.5171   7
   3  -2   0 221.877 22.5344   4
  -3  -2   0 259.373 22.4343   1
   3  -2   0 228.594 22.5356   5
  -3  -2   0 240.230 22.4518   5
   3  -2   0 229.360 22.4215   2
  -3  -2   0 253.180 22.4560   7
  -3  -2   0 262.411 22.6382   4
  -3  -2   0 273.488 22.4672   8
  -3   2   0 266.751 22.4888   8
   3   2   0 261.335 22.4445   1
  -3   2   0 220.885 22.4925   5
  -3   2   0 222.634 22.4213   2
   3   2   0 233.112 22.4855   6
   3   2   0 265.657 22.4606   1
   3   2   0 237.304 22.4339   5
   3   2   0 271.430 22.4701   8
  -3   2   0 216.999 22.5522   7
   3   2   0 249.824 22.4602   7
  -3   2   0 270.207 22.4705   1
  -3   2   0 259.223 22.4856   8
   3   2   0 255.184 22.4770   8
   3   2   0 234.508 22.5867   4
  -3   2   0 246.845 22.6291   4
  -3   2   0 281.467 22.4951   1
  -4  -2   0 564.897 46.4973   7
  -4  -2   0 566.420 46.4736   8
   4  -2   0 513.822 46.4643   8
   4  -2   0 505.914 46.6532   4
   4  -2   0 556.948 46.4740   1
  -4  -2   0 572.105 46.4982   8
   4  -2   0 467.972 46.5140   5
   4  -2   0 429.630 46.5085   7
  -4  -2   0 482.385 46.4624   6
  -4  -2   0 473.554 46.5703   4
  -4  -2   0 494.993 46.4682   5
   4  -2   0 470.382 46.4019   2
   4  -2   0 576.407 46.4924   8
  -4  -2   0 539.273 46.4326   1
   4  -2   0 590.765 46.4674   1
  -4  -2   0 538.556 46.4470   1
  -4   2   0 536.085 46.4710   8
  -4   2   0 591.025 46.5161   8
   4   2   0 484.698 46.4376   7
   4   2   0 524.793 46.4757   8
  -4   2   0 473.265 46.4053   2
   4   2   0 490.707 46.4784   5
   4   2   0 559.607 46.4646   8
  -4   2   0 556.774 46.4548   1
  -4   2   0 470.212 46.5373   7
  -4   2   0 484.708 46.6260   4
   4   2   0 493.561 46.5118   6
  -4   2   0 485.894 46.5685   5
  -4   2   0 559.289 46.4708   1
   4   2   0 563.162 46.4608   1
   4   2   0 554.332 46.4439   1
   4   2   0 477.607 46.6124   4
  -5  -2   0 2.52582 1.51805   1
   5  -2   0 -1.5080 1.95392   7
  -5  -2   0 0.86651 1.63764   7
   5  -2   0 -3.3552 1.38139   1
   5  -2   0 2.10900 1.53560   1
  -5  -2   0 3.33903 1.69652   5
   5  -2   0 0.28369 1.84980   5
  -5  -2   0 2.10227 1.44924   1
   5  -2   0 0.46992 1.57136   8
  -5  -2   0 1.25538 1.58923   8
  -5  -2   0 2.05287 1.57401   8
  -5  -2   0 2.62179 2.27267   4
  -5  -2   0 1.12238 1.59720   6
   5  -2   0 -0.3625 2.20245   4
   5  -2   0 -0.2860 1.72142   8
   5  -2   0 -0.1190 1.23571   2
  -5   2   0 -0.3909 1.49017   1
  -5   2   0 -0.0488 1.30933   8
   5   2   0 -2.7818 1.47236   1
   5   2   0 1.52157 1.55374   8
  -5   2   0 -1.8014 1.52608   4
  -5   2   0 2.66425 1.92188   5
   5   2   0 -0.8530 1.60758   5
   5   2   0 1.52413 1.73293   4
   5   2   0 -1.1804 1.65345   8
  -5   2   0 -1.8051 1.46102   1
   5   2   0 1.26897 1.73238   7
  -5   2   0 -0.0227 1.95054   7
  -5   2   0 0.19762 1.33857   2
  -5   2   0 1.40369 1.47329   8
   5   2   0 1.13669 1.46367   1
   5   2   0 -2.4482 1.52096   6
  -6  -2   0 45.7594 5.54437   4
   6  -2   0 42.0479 4.94153   5
  -6  -2   0 48.2028 4.96636   1
   6  -2   0 48.5886 5.07859   1
   6  -2   0 39.4616 5.36068   7
  -6  -2   0 52.5653 5.09543   8
  -6  -2   0 47.8574 4.96884   1
   6  -2   0 42.0979 5.16879   4
  -6  -2   0 40.1142 5.06930   5
  -6  -2   0 44.3602 5.01181   7
   6  -2   0 42.8972 4.74876   2
   6  -2   0 49.6625 5.19434   8
  -6  -2   0 39.0918 4.97173   6
   6  -2   0 40.3518 4.80444   8
  -6  -2   0 46.9037 4.52859   2
  -6  -2   0 48.4288 5.05620   8
   6  -2   0 47.6599 5.08275   1
  -6   2   0 44.8276 5.12938   8
   6   2   0 38.5191 5.01198   5
  -6   2   0 53.9727 5.03938   1
   6   2   0 40.7670 5.11581   4
   6   2   0 42.3969 5.07523   6
  -6   2   0 47.7582 5.52456   4
   6   2   0 53.2738 5.07709   1
  -6   2   0 50.0443 5.46265   5
  -6   2   0 39.4673 4.78650   2
   6   2   0 47.4900 5.01414   8
  -6   2   0 45.0859 4.98681   1
  -6   2   0 44.8962 5.04160   8
   6   2   0 47.5635 5.18166   7
   6   2   0 53.1748 5.21467   8
   6   2   0 49.2328 5.00087   1
  -6   2   0 41.4841 5.40028   7
   7  -2   0 93.4247 10.7016   4
  -7  -2   0 107.229 10.2774   7
   7  -2   0 118.703 10.2785   1
  -7  -2   0 118.033 10.3262   8
   7  -2   0 98.9852 10.3361   8
   7  -2   0 101.518 10.1161   2
  -7  -2   0 106.302 10.3941   6
   7  -2   0 112.831 10.5832   5
  -7  -2   0 99.9464 10.4313   4
  -7  -2   0 110.974 10.2789   8
  -7  -2   0 97.3367 10.3296   5
   7  -2   0 87.0911 10.4383   7
   7  -2   0 114.010 10.3174   8
  -7  -2   0 120.391 10.2804   1
   7  -2   0 105.524 10.2861   1
  -7  -2   0 121.322 10.2746   1
  -7  -2   0 102.998 9.91035   2
   7   2   0 109.943 10.2776   1
  -7   2   0 120.003 10.6809   5
   7   2   0 107.367 10.1519   8
  -7   2   0 108.214 10.2547   1
  -7   2   0 95.5966 10.4685   7
   7   2   0 102.000 10.3560   5
  -7   2   0 108.143 10.2971   8
  -7   2   0 107.418 10.2651   1
   7   2   0 124.952 10.3260   1
   7   2   0 105.463 10.3763   7
  -7   2   0 98.8208 10.0827   2
   7   2   0 92.5854 10.7112   4
   7   2   0 121.266 10.3198   8
  -7   2   0 97.4352 10.6288   4
  -7   2   0 108.604 10.3643   8
   8  -2   0 65.7440 6.87373   2
   8  -2   0 67.5703 7.37002   4
  -8  -2   0 59.2412 6.97657   1
   8  -2   0 68.9868 7.20835   1
   8  -2   0 78.5497 7.35937   8
  -8  -2   0 68.5505 6.57806   2
   8  -2   0 76.1280 7.12167   1
  -8  -2   0 68.4015 7.07740   8
  -8  -2   0 62.2600 7.01187   6
  -8  -2   0 63.4362 7.07660   8
  -8  -2   0 65.3189 7.02276   1
  -8  -2   0 66.2146 7.06108   7
   8  -2   0 67.8689 7.40964   5
   8  -2   0 77.9786 7.17888   8
  -8  -2   0 78.3408 7.38442   5
  -8  -2   0 64.2684 7.27935   4
   8  -2   0 58.8156 7.37306   7
   8   2   0 66.4089 7.22251   1
  -8   2   0 64.0130 7.07369   8
   8   2   0 65.0042 7.72245   4
  -8   2   0 73.1895 7.12519   1
  -8   2   0 66.2724 7.05784   1
  -8   2   0 63.6858 7.37218   7
  -8   2   0 75.5326 7.24681   8
   8   2   0 66.4470 7.26693   7
   8   2   0 72.8265 7.14304   8
  -8   2   0 63.0791 6.98852   2
  -8   2   0 64.1873 7.66618   4
   8   2   0 69.4471 7.32215   8
   8   2   0 74.0806 7.27171   5
  -8   2   0 61.2345 7.48676   5
   8   2   0 69.2754 6.99475   1
   9  -2   0 545.359 56.3990   7
   9  -2   0 638.122 56.3443   1
   9  -2   0 619.434 56.5251   5
  -9  -2   0 664.246 56.5656   5
  -9  -2   0 626.367 56.2762   1
  -9  -2   0 636.023 56.3368   8
   9  -2   0 603.353 56.7317   4
   9  -2   0 562.657 56.0706   2
  -9  -2   0 630.332 56.0358   2
   9  -2   0 701.612 56.3468   1
  -9  -2   0 617.037 56.3082   8
   9  -2   0 685.119 56.3803   8
  -9  -2   0 647.754 56.7432   4
   9  -2   0 640.269 56.4016   8
  -9  -2   0 596.083 56.2376   1
  -9  -2   0 639.712 56.3847   6
  -9  -2   0 639.499 56.3353   7
  -9   2   0 634.621 56.2848   1
  -9   2   0 562.663 56.2517   1
  -9   2   0 673.041 56.7082   5
   9   2   0 652.580 56.3320   8
  -9   2   0 657.026 56.7674   4
   9   2   0 679.756 56.3064   1
   9   2   0 704.357 56.4731   8
   9   2   0 577.075 56.3387   7
   9   2   0 585.702 56.6072   4
  -9   2   0 636.570 56.2244   2
  -9   2   0 591.268 56.3136   8
  -9   2   0 544.823 56.3455   7
  -9   2   0 599.479 56.2993   8
   9   2   0 644.160 56.4850   5
   9   2   0 673.596 56.3980   1
 -10  -2   0 41.9702 5.92703   7
  10  -2   0 38.6974 5.92784   7
 -10  -2   0 50.3648 5.09323   2
 -10  -2   0 40.5617 5.56884   8
 -10  -2   0 50.5951 6.01846   5
 -10  -2   0 46.0975 5.64135   8
 -10  -2   0 38.2694 5.48964   6
 -10  -2   0 45.7876 5.71585   1
  10  -2   0 41.2885 5.28386   8
  10  -2   0 37.4940 6.47376   4
  10  -2   0 36.8688 5.55776   1
  10  -2   0 44.8447 5.82840   8
  10  -2   0 56.1280 5.26694   2
  10  -2   0 48.3006 5.57675   1
 -10  -2   0 44.6535 5.45789   1
 -10   2   0 43.1831 5.58815   1
  10   2   0 49.8864 5.82713   1
  10   2   0 49.3135 5.98199   8
  10   2   0 46.9491 6.53584   4
 -10   2   0 61.6608 5.55529   2
  10   2   0 47.5901 5.63879   8
  10   2   0 57.2390 5.78199   1
 -10   2   0 48.5028 6.30199   5
 -10   2   0 41.1090 5.64084   8
 -10   2   0 46.4478 5.76296   1
  10   2   0 42.3397 5.94386   7
  10   2   0 49.1271 5.94727   5
 -10   2   0 44.7694 5.96247   7
 -10   2   0 45.8706 5.69878   8
  11  -2   0 92.6422 10.5107   4
 -11  -2   0 79.1799 9.59893   8
 -11  -2   0 93.5394 9.62075   1
  11  -2   0 81.2881 10.2527   7
 -11  -2   0 102.182 9.25456   2
 -11  -2   0 99.7619 10.0534   5
 -11  -2   0 98.1243 9.77524   8
  11  -2   0 94.1660 9.90019   8
  11  -2   0 84.9911 9.66799   1
 -11  -2   0 103.239 9.74445   6
  11  -2   0 85.8817 9.19486   2
  11  -2   0 101.957 9.74681   8
 -11   2   0 76.2439 9.54185   8
 -11   2   0 91.6101 9.64226   1
  11   2   0 95.4247 10.1946   7
 -11   2   0 93.7245 9.54890   8
  11   2   0 100.871 10.5488   4
 -11   2   0 87.6498 10.1689   5
  11   2   0 87.2077 9.84983   1
  11   2   0 98.1662 9.66871   1
 -11   2   0 102.171 10.0197   7
 -11   2   0 115.376 9.56448   2
  11   2   0 101.688 9.74368   8
  11   2   0 112.156 10.1357   8
 -11   2   0 98.7966 9.53501   6
 -12  -2   0 126.602 12.2360   5
 -12  -2   0 109.487 11.7397   1
  12  -2   0 112.612 12.4724   7
  12  -2   0 129.999 11.4319   2
 -12  -2   0 106.308 11.7268   8
 -12  -2   0 129.322 12.4229   6
  12  -2   0 127.757 11.8959   8
  12  -2   0 116.443 12.0081   8
 -12  -2   0 116.243 11.8691   8
  12  -2   0 106.535 11.8301   1
 -12  -2   0 134.256 11.4124   2
  12  -2   0 124.539 12.3592   4
  12   2   0 129.572 12.6556   4
 -12   2   0 138.295 12.5553   5
  12   2   0 108.525 11.9715   8
 -12   2   0 108.629 11.8325   8
 -12   2   0 137.277 11.6697   2
  12   2   0 111.958 11.8002   8
  12   2   0 97.8560 11.8803   7
  12   2   0 103.343 11.8028   1
 -12   2   0 106.156 11.7374   8
 -12   2   0 132.894 11.7217   6
 -12   2   0 123.161 11.8631   1
 -13  -2   0 148.819 12.8057   5
 -13  -2   0 114.172 12.1581   8
 -13  -2   0 139.464 11.6697   2
  13  -2   0 105.769 12.1954   1
  13  -2   0 114.929 12.8305   7
  13  -2   0 129.259 12.2848   8
  13  -2   0 127.200 12.4154   8
 -13  -2   0 103.687 12.0264   1
  13  -2   0 124.245 12.7056   4
 -13  -2   0 120.804 12.2451   8
  13   2   0 115.183 12.3893   7
  13   2   0 113.348 12.2846   1
 -13   2   0 110.325 12.2058   1
  13   2   0 119.420 12.2250   8
  13   2   0 124.266 12.6322   4
 -13   2   0 108.222 12.1602   8
  13   2   0 105.028 12.3154   8
 -13   2   0 145.617 13.0575   5
 -13   2   0 124.381 12.3003   8
 -13   2   0 141.045 12.0145   2
  14  -2   0 -0.0267 2.98460   4
 -14  -2   0 2.60666 2.53847   1
  14  -2   0 -1.4387 2.80073   8
  14  -2   0 -2.3231 2.61846   8
 -14  -2   0 -0.7989 2.42600   8
 -14  -2   0 6.11473 3.37888   5
  14  -2   0 3.70468 3.26949   7
  14  -2   0 3.79677 2.78015   1
 -14  -2   0 0.06988 1.85284   2
 -14   2   0 -0.2599 2.12379   2
  14   2   0 3.55318 3.44849   7
  14   2   0 -0.6941 2.79982   8
 -14   2   0 5.69707 2.81659   8
  14   2   0 -0.5543 2.74001   8
  14   2   0 -1.8213 3.50343   4
 -14   2   0 1.74639 3.48875   5
  14   2   0 -3.0039 2.57983   1
 -14   2   0 2.97158 2.58398   1
 -14   2   0 -6.2216 2.22036   8
  15  -2   0 4.83507 3.54656   4
 -15  -2   0 9.79023 2.42978   2
 -15  -2   0 3.21442 2.82857   8
  15  -2   0 5.43433 3.49074   7
 -15  -2   0 6.54852 2.81321   1
  15  -2   0 4.54313 3.27069   8
  15  -2   0 4.66759 3.07066   1
 -15  -2   0 5.65582 3.70681   5
 -15   2   0 9.31352 3.05208   1
  15   2   0 6.22031 3.40716   8
  15   2   0 7.76859 3.33102   8
 -15   2   0 4.46230 3.07386   8
  15   2   0 5.62510 3.21546   1
  15   2   0 13.4067 4.55397   4
 -15   2   0 7.77338 2.69891   2
  15   2   0 9.76856 3.52055   7
 -15   2   0 6.80074 4.00553   5
 -16  -2   0 15.1707 4.57697   5
  16  -2   0 9.95896 4.57829   7
 -16  -2   0 15.2904 3.01343   2
  16  -2   0 22.4008 5.04083   4
 -16  -2   0 18.4015 3.85307   8
  16  -2   0 17.2774 4.05071   1
 -16  -2   0 16.3578 3.74196   1
  16  -2   0 13.4805 4.14015   8
  16   2   0 12.6193 4.29599   7
  16   2   0 14.3110 4.29406   8
 -16   2   0 17.8093 3.79783   1
 -16   2   0 21.8665 3.47693   2
 -16   2   0 21.6926 5.09866   5
  16   2   0 20.4507 5.58034   4
 -16   2   0 20.5998 4.06281   8
  16   2   0 15.5619 3.93933   1
 -17  -2   0 -3.4704 2.67067   1
  17  -2   0 1.01987 4.67529   4
  17  -2   0 -2.4631 3.28333   7
  17  -2   0 0.71065 3.63075   8
  17  -2   0 0.70503 3.39609   1
 -17  -2   0 -1.2671 2.77634   8
 -17  -2   0 1.78330 3.83477   5
 -17  -2   0 2.43317 2.11022   2
  17   2   0 3.42374 3.60345   8
  17   2   0 4.25419 3.16223   1
  17   2   0 6.20158 4.76293   4
 -17   2   0 4.31361 3.22517   8
 -17   2   0 0.52225 4.13096   5
 -17   2   0 0.55953 2.45555   2
 -17   2   0 -2.1861 2.60077   1
  17   2   0 -0.8759 3.30056   7
 -18  -2   0 16.3982 4.58294   8
  18  -2   0 23.9582 5.30624   7
  18  -2   0 14.9541 4.44736   1
  18  -2   0 21.2264 6.32795   4
 -18  -2   0 18.2943 4.13356   1
 -18  -2   0 28.1678 5.69272   5
  18  -2   0 16.8255 4.75469   8
 -18   2   0 27.2451 4.00216   2
  18   2   0 14.1803 4.65941   8
  18   2   0 14.3466 4.21156   1
 -18   2   0 18.0769 4.24168   1
  18   2   0 20.3195 5.11707   7
 -18   2   0 24.8521 4.68507   8
 -18   2   0 28.7910 6.21460   5
  18   2   0 23.6361 6.05974   4
 -19  -2   0 -1.2100 2.78550   1
  19  -2   0 -0.8879 3.49465   1
  19  -2   0 0.39915 5.13997   4
  19  -2   0 0.94877 4.20548   7
  19   2   0 -2.2322 3.50691   4
 -19   2   0 2.91723 3.31671   1
 -19   2   0 -5.3697 4.01354   5
  19   2   0 -0.2537 3.67816   7
 -19   2   0 -3.6692 2.81833   2
  19   2   0 0.10437 3.45031   1
  20  -2   0 5.89164 3.90630   1
  20  -2   0 9.80462 5.60488   4
  20  -2   0 6.53778 4.39956   7
 -20  -2   0 4.50339 3.33428   1
 -20  -2   0 3.17615 4.50322   5
 -20   2   0 8.91728 3.85064   1
  20   2   0 0.02738 4.99687   4
  20   2   0 5.68051 4.41962   7
 -20   2   0 10.5003 5.27012   5
  20   2   0 -2.0997 3.43676   1
  21  -2   0 30.2889 6.20388   1
 -21  -2   0 49.9251 7.95828   5
  21  -2   0 37.9196 7.12052   7
 -21  -2   0 32.0868 5.92381   1
  21  -2   0 44.7865 8.79489   4
  21   2   0 37.6577 6.27960   1
 -21   2   0 47.1820 8.06736   5
  21   2   0 33.5090 6.52820   7
  21   2   0 41.6694 8.22204   4
 -21   2   0 31.3927 6.03511   1
   0  -3   0 1.57401 0.84429   2
   0  -3   0 1.06805 0.60777   5
   0  -3   0 0.27351 0.84334   1
   0  -3   0 0.31868 0.94974   8
   0  -3   0 0.85493 0.75872   1
   0  -3   0 -0.0796 0.72995   6
   0  -3   0 1.40888 0.88540   8
   0   3   0 0.71185 0.85514   8
   0   3   0 0.76903 0.95229   6
   0   3   0 1.09115 0.83962   2
   0   3   0 0.17044 0.80186   1
   0   3   0 1.77429 0.88120   1
   0   3   0 -0.0448 0.90639   8
  -1  -3   0 360.375 31.5575   2
   1  -3   0 378.813 31.7707   7
   1  -3   0 339.677 31.5696   1
   1  -3   0 336.075 31.5731   1
   1  -3   0 359.257 31.6038   8
  -1  -3   0 348.562 31.6191   6
   1  -3   0 382.114 31.6220   2
   1  -3   0 387.767 31.5889   5
  -1  -3   0 342.049 31.6006   8
  -1  -3   0 341.062 31.6343   4
  -1  -3   0 345.704 31.5833   8
  -1  -3   0 331.060 31.5812   1
  -1  -3   0 353.802 31.4561   5
   1  -3   0 367.332 31.6288   8
  -1  -3   0 332.431 31.5618   1
   1  -3   0 366.171 31.6039   6
  -1   3   0 387.090 31.6368   2
  -1   3   0 335.588 31.5874   8
   1   3   0 342.046 31.5962   8
   1   3   0 341.769 31.5892   1
   1   3   0 360.382 31.5636   2
  -1   3   0 340.752 31.5834   1
   1   3   0 331.667 31.5912   8
  -1   3   0 359.110 31.7394   7
  -1   3   0 343.734 31.5894   1
   1   3   0 364.177 31.5927   1
  -1   3   0 362.608 31.6302   8
   1   3   0 366.223 31.6533   4
  -1   3   0 357.029 31.5947   6
   2  -3   0 66.0037 5.57753   1
  -2  -3   0 63.2563 5.67126   8
   2  -3   0 54.0708 5.96608   7
  -2  -3   0 63.6431 5.53352   1
  -2  -3   0 62.9773 5.55984   8
   2  -3   0 67.2169 5.65950   2
  -2  -3   0 46.9817 5.37657   2
  -2  -3   0 61.9232 5.36835   5
   2  -3   0 59.8138 5.61470   8
  -2  -3   0 52.5933 5.68788   4
  -2  -3   0 50.3750 5.22138   3
  -2  -3   0 59.6720 5.58154   1
   2  -3   0 47.6333 5.55471   5
   2  -3   0 58.0275 5.53820   1
  -2  -3   0 51.5249 5.61317   6
   2  -3   0 66.2327 5.64315   8
   2   3   0 47.0484 5.40946   2
  -2   3   0 65.0630 5.59064   1
   2   3   0 59.4654 5.24805   3
  -2   3   0 59.5310 5.57552   6
   2   3   0 61.4530 5.59254   1
   2   3   0 64.0170 5.60853   8
   2   3   0 59.9941 5.55339   1
  -2   3   0 52.3862 5.62563   5
  -2   3   0 50.8505 5.89146   7
  -2   3   0 64.0273 5.60081   1
   2   3   0 50.6568 5.62933   6
  -2   3   0 65.8676 5.63463   8
  -2   3   0 53.5532 5.49525   2
  -2   3   0 58.8185 5.68454   8
   2   3   0 63.6423 5.73694   4
   2   3   0 57.6295 5.59217   8
  -3  -3   0 43.4590 4.61074   8
   3  -3   0 38.4767 4.59368   5
   3  -3   0 45.3459 4.60996   8
  -3  -3   0 41.4106 4.49301   1
   3  -3   0 41.2161 4.45669   1
   3  -3   0 38.0279 4.51848   2
  -3  -3   0 42.9838 4.05659   3
  -3  -3   0 50.0004 4.54725   8
   3  -3   0 41.4000 5.00050   7
   3  -3   0 44.3433 4.51156   1
  -3  -3   0 40.0100 4.30619   5
  -3  -3   0 46.8938 4.88954   4
   3  -3   0 43.8946 4.55150   8
  -3  -3   0 36.7454 4.54510   6
  -3  -3   0 44.0381 4.49043   1
   3   3   0 50.7390 4.63661   8
   3   3   0 38.1240 4.38084   5
  -3   3   0 34.7956 4.51759   2
  -3   3   0 49.3223 4.53410   8
   3   3   0 46.3600 4.49109   1
  -3   3   0 46.1880 4.53765   1
   3   3   0 53.4222 4.62117   8
  -3   3   0 42.6363 4.48362   1
  -3   3   0 43.8218 4.61618   8
   3   3   0 50.0717 4.58996   1
  -3   3   0 43.8384 4.91098   4
  -3   3   0 37.2631 4.65400   7
   3   3   0 40.0636 4.63882   6
   3   3   0 38.4731 4.51719   4
   3   3   0 45.8917 4.50971   7
  -3   3   0 36.9661 4.65961   5
   4  -3   0 864.695 86.8783   2
   4  -3   0 1064.36 86.9843   8
   4  -3   0 847.841 87.0333   7
  -4  -3   0 1040.02 86.9490   7
  -4  -3   0 886.182 86.9381   6
   4  -3   0 1051.43 86.9550   1
  -4  -3   0 1045.20 86.9291   8
   4  -3   0 913.157 87.0208   5
  -4  -3   0 926.480 86.8998   5
  -4  -3   0 914.637 87.0571   4
   4  -3   0 897.299 87.0900   4
  -4  -3   0 1009.27 86.8951   1
  -4  -3   0 1004.89 86.9265   8
   4  -3   0 1061.32 86.9348   1
  -4  -3   0 991.952 86.8981   1
   4  -3   0 1048.76 86.9549   8
  -4   3   0 885.426 87.0024   5
  -4   3   0 907.510 86.9099   2
   4   3   0 860.324 86.9466   6
   4   3   0 1036.87 86.9381   8
  -4   3   0 1050.73 86.9557   1
   4   3   0 1015.75 86.9559   7
   4   3   0 914.898 87.0730   4
  -4   3   0 1101.42 86.9547   1
   4   3   0 939.870 86.8983   5
   4   3   0 1014.74 86.9238   1
  -4   3   0 917.058 87.0922   4
  -4   3   0 1040.49 86.9494   8
  -4   3   0 895.681 87.0352   7
   4   3   0 1015.55 86.9540   8
   4   3   0 1053.18 86.9127   1
  -4   3   0 1027.65 86.9671   8
   5  -3   0 252.660 25.5472   4
   5  -3   0 233.619 25.4404   7
   5  -3   0 309.701 25.3484   8
  -5  -3   0 275.442 25.2986   5
   5  -3   0 256.715 25.2254   2
   5  -3   0 318.796 25.3419   1
  -5  -3   0 265.477 25.3242   6
   5  -3   0 263.372 25.4346   5
  -5  -3   0 310.814 25.3193   1
  -5  -3   0 272.522 25.5668   4
  -5  -3   0 290.691 25.3061   7
   5  -3   0 290.406 25.3245   1
  -5  -3   0 295.452 25.3094   8
  -5  -3   0 289.158 25.2654   1
  -5  -3   0 288.180 25.3069   8
   5  -3   0 289.766 25.3537   8
   5   3   0 246.389 25.5149   4
  -5   3   0 315.392 25.3594   1
   5   3   0 282.208 25.2954   8
   5   3   0 262.059 25.3403   6
   5   3   0 285.607 25.3544   5
  -5   3   0 318.947 25.3502   1
  -5   3   0 238.722 25.4117   4
  -5   3   0 255.309 25.4629   7
  -5   3   0 264.566 25.4738   5
   5   3   0 292.477 25.3044   1
  -5   3   0 256.878 25.2607   2
  -5   3   0 302.945 25.3726   8
   5   3   0 287.942 25.3190   7
   5   3   0 281.218 25.3409   8
  -5   3   0 268.380 25.3029   8
   5   3   0 298.742 25.2862   1
  -6  -3   0 135.550 13.7706   5
  -6  -3   0 155.479 13.8328   8
   6  -3   0 160.034 13.7838   1
   6  -3   0 161.438 13.8179   8
   6  -3   0 127.139 14.0911   4
  -6  -3   0 155.964 13.7240   8
   6  -3   0 122.112 13.9551   7
   6  -3   0 136.159 13.6406   2
  -6  -3   0 141.527 13.9457   4
  -6  -3   0 158.920 13.7544   1
   6  -3   0 136.629 13.8304   5
  -6  -3   0 161.889 13.8937   7
  -6  -3   0 147.308 13.7300   1
  -6  -3   0 127.617 13.7468   6
   6  -3   0 149.792 13.8574   8
   6  -3   0 147.199 13.7842   1
   6   3   0 164.994 13.7952   8
  -6   3   0 149.480 13.8298   8
  -6   3   0 139.332 14.0834   4
   6   3   0 144.218 13.8321   6
  -6   3   0 156.652 13.8147   1
   6   3   0 141.391 14.1312   4
  -6   3   0 131.166 13.6749   2
   6   3   0 157.342 13.8795   8
  -6   3   0 151.608 13.8306   8
   6   3   0 146.217 13.7727   7
  -6   3   0 163.930 13.8430   1
  -6   3   0 133.679 13.9997   5
   6   3   0 160.288 13.7572   1
   6   3   0 143.474 13.8752   5
  -6   3   0 127.323 13.9816   7
   6   3   0 166.570 13.8287   1
  -7  -3   0 223.885 21.0133   5
   7  -3   0 220.499 20.8399   2
  -7  -3   0 225.120 20.5939   2
   7  -3   0 255.613 21.0355   8
   7  -3   0 242.650 21.0496   8
   7  -3   0 253.185 20.9806   1
   7  -3   0 234.475 20.9775   1
  -7  -3   0 226.897 21.3439   4
  -7  -3   0 224.357 20.9581   8
  -7  -3   0 235.090 20.9208   1
   7  -3   0 192.536 21.1135   7
   7  -3   0 201.659 21.1563   4
   7  -3   0 242.224 21.2526   5
  -7  -3   0 247.602 20.9923   7
  -7  -3   0 235.623 20.9879   8
  -7  -3   0 197.248 20.9251   6
  -7  -3   0 239.876 20.9440   1
   7   3   0 234.550 20.9963   7
   7   3   0 253.682 20.9466   1
   7   3   0 226.063 21.0185   5
  -7   3   0 221.308 21.2318   5
  -7   3   0 232.119 20.9570   1
   7   3   0 245.934 21.0014   8
   7   3   0 214.048 21.3031   4
   7   3   0 255.913 21.0377   1
   7   3   0 265.045 21.1346   8
  -7   3   0 225.251 20.9890   8
   7   3   0 212.304 21.0608   6
  -7   3   0 203.635 21.1340   7
  -7   3   0 209.408 20.9195   8
  -7   3   0 220.784 20.8750   2
  -7   3   0 217.729 21.2756   4
  -7   3   0 229.026 20.9570   1
  -8  -3   0 25.3085 3.49808   5
  -8  -3   0 19.5311 3.07045   1
  -8  -3   0 23.2908 3.32399   8
   8  -3   0 20.0345 3.67180   4
   8  -3   0 21.0399 3.06989   2
   8  -3   0 20.7591 3.16513   1
   8  -3   0 25.1602 3.72543   8
  -8  -3   0 22.7575 4.06379   4
  -8  -3   0 17.4506 3.10123   8
  -8  -3   0 24.9732 2.95170   2
  -8  -3   0 23.2833 3.30965   6
  -8  -3   0 22.5925 3.62647   7
   8  -3   0 32.3668 3.90475   1
   8  -3   0 20.4622 3.36705   8
  -8  -3   0 19.2024 3.09528   1
   8  -3   0 24.4349 3.76902   7
   8  -3   0 21.3472 3.73460   5
  -8   3   0 25.4279 3.78717   2
   8   3   0 18.0539 3.95086   4
   8   3   0 19.3418 3.19404   1
  -8   3   0 28.5160 3.96327   8
  -8   3   0 16.2470 3.01088   1
  -8   3   0 22.7859 3.95081   4
   8   3   0 24.9847 3.71194   7
   8   3   0 21.4091 3.31697   6
   8   3   0 25.1456 3.70837   5
  -8   3   0 20.9521 3.19570   8
   8   3   0 20.4096 3.31519   8
  -8   3   0 19.5490 3.72814   7
   8   3   0 27.1199 3.79720   8
   8   3   0 24.0975 3.20976   1
  -8   3   0 18.4611 3.15897   1
  -8   3   0 23.5921 3.85097   5
  -9  -3   0 79.7679 8.34154   6
  -9  -3   0 81.6333 9.10388   4
   9  -3   0 86.4115 8.48708   1
   9  -3   0 80.4768 8.70280   5
  -9  -3   0 83.0799 8.42557   8
   9  -3   0 74.1199 9.07380   4
  -9  -3   0 80.3985 8.28854   1
  -9  -3   0 82.7925 8.41321   8
  -9  -3   0 80.8060 7.81259   2
  -9  -3   0 78.6258 8.54560   5
   9  -3   0 89.6493 8.35134   1
   9  -3   0 79.1421 8.76904   7
   9  -3   0 85.3920 8.42700   8
  -9  -3   0 70.8784 8.15444   1
   9  -3   0 86.5763 8.53870   8
   9  -3   0 76.5170 8.11054   2
  -9  -3   0 89.1465 8.39822   7
  -9   3   0 92.0105 8.52699   8
  -9   3   0 89.4970 9.05324   4
   9   3   0 87.9657 8.34521   1
  -9   3   0 83.2252 8.47178   8
   9   3   0 83.7260 8.54730   5
  -9   3   0 78.9818 8.15514   2
   9   3   0 77.8634 8.39949   1
   9   3   0 70.2956 8.43378   7
  -9   3   0 74.7256 8.66524   7
  -9   3   0 74.1268 8.32358   1
   9   3   0 88.3294 8.43394   8
  -9   3   0 84.2894 8.36411   1
  -9   3   0 78.0363 8.81793   5
   9   3   0 90.9314 8.74372   8
   9   3   0 75.2027 9.08014   4
  10  -3   0 55.7733 6.48264   2
 -10  -3   0 63.8508 6.89893   6
 -10  -3   0 58.6895 6.81974   1
 -10  -3   0 56.8430 6.84688   7
 -10  -3   0 61.7526 6.29257   2
 -10  -3   0 64.2451 7.14588   5
  10  -3   0 52.4412 7.28282   7
 -10  -3   0 68.6261 6.87966   1
 -10  -3   0 67.9915 7.00965   8
  10  -3   0 65.7897 7.01041   8
  10  -3   0 56.6912 6.97519   1
  10  -3   0 64.3148 7.88150   4
  10  -3   0 58.4562 7.07920   8
  10  -3   0 62.6312 6.84784   1
 -10  -3   0 62.9420 6.91498   8
 -10   3   0 69.6586 6.88336   2
  10   3   0 61.9284 7.16924   8
  10   3   0 49.0383 7.63885   4
 -10   3   0 72.3026 7.58190   5
 -10   3   0 58.4568 6.96377   8
 -10   3   0 74.2108 7.73127   7
  10   3   0 71.0836 7.21071   5
 -10   3   0 65.2864 7.05368   8
 -10   3   0 59.8509 7.06590   1
  10   3   0 71.4828 6.97201   8
  10   3   0 63.7428 7.00177   1
  10   3   0 54.0137 7.08657   7
 -10   3   0 62.5606 7.03696   1
 -11  -3   0 106.631 10.1574   7
 -11  -3   0 95.3970 10.0782   1
  11  -3   0 100.106 10.1358   8
  11  -3   0 86.6058 10.2147   8
  11  -3   0 94.0303 10.1791   1
  11  -3   0 93.7357 10.4904   7
 -11  -3   0 110.231 10.4466   5
 -11  -3   0 103.388 10.1285   6
 -11  -3   0 92.8459 10.1069   8
 -11  -3   0 107.140 9.62769   2
  11  -3   0 109.679 11.1085   4
  11  -3   0 108.989 9.88065   2
 -11  -3   0 96.8786 10.1401   8
  11   3   0 96.6462 10.2041   1
 -11   3   0 98.3980 10.1141   1
 -11   3   0 102.482 10.0256   2
  11   3   0 97.6054 10.3291   7
  11   3   0 103.902 10.1928   8
  11   3   0 99.6529 10.4703   4
 -11   3   0 84.0882 10.0667   8
 -11   3   0 95.7764 10.2024   8
 -11   3   0 113.364 10.8281   5
  11   3   0 105.008 10.4916   8
 -12  -3   0 2.63041 2.31680   8
 -12  -3   0 0.59776 2.65931   5
  12  -3   0 0.62009 2.63661   1
 -12  -3   0 0.54022 1.58516   2
  12  -3   0 2.45191 1.80778   2
  12  -3   0 2.25789 2.42426   8
  12  -3   0 2.73399 3.00383   7
  12  -3   0 3.27335 2.90191   4
 -12  -3   0 4.55807 2.31543   1
 -12  -3   0 -0.0280 2.41850   8
  12  -3   0 -0.4792 1.97043   8
 -12   3   0 2.64871 2.33744   8
 -12   3   0 2.33370 1.84370   2
 -12   3   0 3.14030 2.57134   8
 -12   3   0 4.49026 3.22923   5
  12   3   0 1.39781 2.38948   8
  12   3   0 -1.6242 2.56041   8
  12   3   0 2.35819 3.41318   4
  12   3   0 1.75641 2.74502   7
  12   3   0 1.58154 2.29659   1
 -12   3   0 3.27699 2.30076   1
 -12   3   0 5.07557 2.41170   6
  13  -3   0 2.37294 2.59982   8
 -13  -3   0 3.10342 2.50176   8
  13  -3   0 3.40681 2.76612   1
  13  -3   0 9.80746 4.11582   4
 -13  -3   0 8.89916 2.89808   8
  13  -3   0 1.49996 2.83233   8
 -13  -3   0 6.31728 1.89310   2
  13  -3   0 2.32891 2.03550   2
 -13  -3   0 -0.8128 2.88152   5
  13  -3   0 4.34782 3.26275   7
 -13  -3   0 4.66744 2.39925   1
 -13   3   0 5.68759 2.62011   1
 -13   3   0 0.36140 3.39907   5
 -13   3   0 3.72214 2.67638   8
 -13   3   0 3.25759 2.64290   8
  13   3   0 3.39573 3.35915   7
  13   3   0 5.18290 3.04172   8
 -13   3   0 3.56683 2.38653   2
  13   3   0 4.70103 2.84273   8
  13   3   0 0.46901 2.68929   1
  13   3   0 5.96560 3.81913   4
 -14  -3   0 44.2899 6.17631   8
  14  -3   0 41.3064 6.47469   7
 -14  -3   0 31.2674 5.22391   1
  14  -3   0 45.2769 5.83736   1
  14  -3   0 49.6300 7.44000   4
 -14  -3   0 45.5682 6.42549   5
  14  -3   0 43.0746 6.48080   8
 -14  -3   0 47.4379 5.11301   2
  14   3   0 40.7859 6.29893   8
  14   3   0 39.2540 5.66893   1
 -14   3   0 41.2868 5.66004   8
  14   3   0 43.7044 6.12063   7
  14   3   0 42.7819 5.57130   8
 -14   3   0 40.8993 6.01800   1
 -14   3   0 39.9658 6.06432   8
  14   3   0 46.0405 6.89594   4
 -14   3   0 48.1108 5.79326   2
 -14   3   0 36.8097 6.01959   5
  15  -3   0 121.477 13.3613   7
  15  -3   0 139.610 14.2705   4
 -15  -3   0 132.540 13.0607   8
 -15  -3   0 114.576 12.8422   1
 -15  -3   0 148.476 12.3460   2
 -15  -3   0 161.942 13.6850   5
  15  -3   0 117.124 13.0386   1
  15  -3   0 103.599 13.1506   8
 -15   3   0 127.550 13.1496   8
  15   3   0 105.652 13.3392   7
 -15   3   0 111.808 12.8956   1
 -15   3   0 162.744 14.1238   8
  15   3   0 109.380 13.0759   8
 -15   3   0 145.895 13.9803   5
 -15   3   0 150.789 12.8124   2
  15   3   0 118.075 13.0877   1
  15   3   0 108.752 12.9138   8
  15   3   0 124.866 13.4028   4
 -16  -3   0 -4.3136 3.16076   5
  16  -3   0 4.01570 4.51951   4
  16  -3   0 0.52369 3.49470   7
 -16  -3   0 -4.2576 2.43975   8
  16  -3   0 1.50297 3.44731   8
 -16  -3   0 -1.5006 2.61726   1
  16  -3   0 6.92571 3.33846   1
 -16  -3   0 2.71710 1.97347   2
 -16   3   0 -3.7535 2.37689   1
  16   3   0 -0.3348 3.04075   7
  16   3   0 -0.2673 2.97672   1
 -16   3   0 -2.4615 4.01523   5
 -16   3   0 2.54249 3.00924   8
 -16   3   0 -1.5556 2.05939   2
  16   3   0 3.83295 3.55216   4
  16   3   0 -1.0232 3.22298   8
 -17  -3   0 11.7853 3.30486   1
 -17  -3   0 9.85024 4.20328   5
  17  -3   0 -1.9854 3.45601   8
  17  -3   0 8.47429 4.84740   4
  17  -3   0 4.18102 3.91867   7
  17  -3   0 4.58382 3.55031   1
 -17  -3   0 2.88478 3.10419   8
  17   3   0 6.92323 3.46571   1
  17   3   0 5.34959 3.75451   7
 -17   3   0 7.77347 3.75582   5
  17   3   0 10.9178 4.15958   4
  17   3   0 4.10953 3.75168   8
 -17   3   0 -3.0323 2.89688   8
 -17   3   0 4.63184 2.96713   1
 -17   3   0 5.14372 2.70412   2
  18  -3   0 -2.0573 3.28486   1
  18  -3   0 0.42300 3.79253   8
  18  -3   0 -3.2061 4.71277   4
  18  -3   0 -4.9851 3.95598   7
 -18  -3   0 2.30779 2.97736   1
 -18  -3   0 3.65880 3.90664   5
  18   3   0 4.71649 3.33819   1
 -18   3   0 5.25020 2.93503   2
  18   3   0 3.63908 4.64244   4
 -18   3   0 2.30391 3.03652   1
 -18   3   0 2.68654 3.34049   8
  18   3   0 -1.9170 3.58327   7
  18   3   0 6.59719 3.81845   8
 -18   3   0 9.78721 4.92873   5
  19  -3   0 0.50117 3.86417   7
  19  -3   0 4.97530 3.88496   1
 -19  -3   0 -3.8767 3.78341   5
  19  -3   0 -0.5771 5.25770   4
 -19  -3   0 2.37617 3.10466   1
  19   3   0 6.08703 3.65964   1
 -19   3   0 6.91769 5.13767   5
  19   3   0 0.29775 4.33544   8
  19   3   0 5.25792 5.10740   4
 -19   3   0 0.90500 2.76330   2
  19   3   0 2.95043 3.58641   7
 -19   3   0 0.94138 3.18876   1
  20  -3   0 24.8801 6.97730   4
 -20  -3   0 16.3043 5.47201   5
  20  -3   0 14.2195 4.75424   1
  20  -3   0 7.14971 5.00915   7
 -20  -3   0 11.6709 3.94346   1
 -20   3   0 13.7546 4.26327   1
  20   3   0 12.2562 4.75901   7
  20   3   0 12.6866 4.31365   1
 -20   3   0 24.3888 6.29578   5
  20   3   0 20.4295 6.32451   4
 -21  -3   0 8.14570 5.13028   5
  21  -3   0 5.84968 5.95549   4
  21  -3   0 0.96554 4.01024   1
  21  -3   0 5.24519 5.12780   7
 -21  -3   0 6.34589 3.68520   1
  21   3   0 6.57938 5.64791   4
 -21   3   0 4.49359 5.10368   5
 -21   3   0 2.25665 3.48458   1
  21   3   0 0.30335 3.76919   7
  21   3   0 8.23890 4.17871   1
   0  -4   0 446.533 37.5939   2
   0  -4   0 451.790 37.6458   6
   0  -4   0 449.077 37.4842   5
   0  -4   0 434.589 37.6243   8
   0  -4   0 391.157 37.5797   1
   0  -4   0 380.053 37.5906   8
   0  -4   0 400.793 37.5731   1
   0   4   0 440.978 37.6033   2
   0   4   0 417.631 37.6334   8
   0   4   0 433.005 37.6423   6
   0   4   0 400.751 37.6023   8
   0   4   0 428.452 37.6053   1
   0   4   0 395.357 37.5887   1
   1  -4   0 967.576 87.7211   1
  -1  -4   0 951.051 87.7213   1
  -1  -4   0 1004.66 87.7929   4
   1  -4   0 1079.04 87.7684   2
   1  -4   0 829.540 87.8561   7
   1  -4   0 1118.04 87.7113   5
  -1  -4   0 1007.97 87.7567   8
   1  -4   0 955.565 87.7254   8
   1  -4   0 1003.50 87.7579   8
  -1  -4   0 940.891 87.7018   1
   1  -4   0 1038.21 87.7552   6
  -1  -4   0 996.010 87.7393   8
   1  -4   0 954.167 87.7117   1
  -1  -4   0 1030.18 87.6937   2
  -1   4   0 1055.12 87.9260   7
  -1   4   0 1065.03 87.7735   2
   1   4   0 959.533 87.7710   6
   1   4   0 939.404 87.7732   4
  -1   4   0 1003.55 87.7753   8
   1   4   0 930.924 87.6822   2
  -1   4   0 975.064 87.7269   1
   1   4   0 1034.52 87.7448   1
  -1   4   0 954.425 87.7250   1
   1   4   0 971.592 87.7392   8
   1   4   0 961.563 87.7296   1
   1   4   0 960.956 87.7482   8
  -1   4   0 932.988 87.7271   8
  -1   4   0 996.441 87.7499   6
   2  -4   0 88.0424 8.10979   8
  -2  -4   0 83.1634 8.19236   4
   2  -4   0 74.0804 8.46747   7
   2  -4   0 87.9699 8.02691   1
  -2  -4   0 87.9471 8.06403   8
  -2  -4   0 89.7397 8.05419   1
  -2  -4   0 103.269 7.81708   5
  -2  -4   0 71.3467 7.88631   2
  -2  -4   0 84.0859 8.13410   6
   2  -4   0 90.1979 8.11316   5
   2  -4   0 69.8606 7.96666   2
   2  -4   0 92.7841 8.05727   1
  -2  -4   0 88.7447 8.07160   1
  -2  -4   0 90.0829 8.14252   8
   2  -4   0 93.8055 8.10149   6
   2  -4   0 94.4221 8.08980   8
   2   4   0 76.7818 8.15526   6
  -2   4   0 90.9904 8.08247   8
  -2   4   0 83.9214 8.00793   6
   2   4   0 82.5929 8.05723   1
  -2   4   0 84.2256 8.04929   1
   2   4   0 96.2782 7.80594   5
   2   4   0 99.2374 8.11271   1
   2   4   0 91.0043 8.12853   8
   2   4   0 72.0245 7.72648   3
  -2   4   0 75.2199 8.10867   2
   2   4   0 90.8651 8.20106   4
   2   4   0 96.9858 8.14024   8
  -2   4   0 85.3569 8.14872   8
  -2   4   0 83.4669 8.05075   1
  -2   4   0 77.0924 8.26803   7
  -2   4   0 69.3340 8.03481   5
   2   4   0 73.7369 7.91651   2
  -3  -4   0 1117.71 93.1262   8
   3  -4   0 1110.20 93.0814   1
   3  -4   0 1151.72 93.0899   1
   3  -4   0 933.043 93.1085   5
  -3  -4   0 923.927 92.9290   2
  -3  -4   0 1138.05 93.1041   1
  -3  -4   0 917.548 92.8264   3
  -3  -4   0 1104.08 93.0747   8
   3  -4   0 1063.83 93.2847   7
  -3  -4   0 966.267 93.1634   4
  -3  -4   0 1056.45 93.0458   1
  -3  -4   0 952.109 92.9367   5
   3  -4   0 1099.71 93.1076   8
   3  -4   0 1078.06 93.0807   8
  -3  -4   0 1016.45 93.1173   6
   3  -4   0 965.036 93.0661   2
   3   4   0 910.876 93.0968   6
   3   4   0 1140.19 93.0933   8
   3   4   0 1046.43 93.0721   1
  -3   4   0 1138.27 93.1135   1
   3   4   0 1031.38 92.9593   5
   3   4   0 1140.54 93.1280   8
   3   4   0 975.525 93.1789   4
  -3   4   0 1166.73 93.1445   8
  -3   4   0 1121.58 93.0815   1
  -3   4   0 897.227 93.0536   2
  -3   4   0 1135.67 93.0599   6
   3   4   0 1184.08 93.0911   1
  -3   4   0 891.885 93.0956   5
  -3   4   0 1116.46 93.1148   8
  -3   4   0 960.484 93.2189   7
   4  -4   0 601.575 49.8001   8
  -4  -4   0 497.172 49.6478   5
   4  -4   0 610.803 49.7758   1
  -4  -4   0 563.450 49.7744   1
  -4  -4   0 555.487 49.7199   1
   4  -4   0 616.285 49.8511   8
   4  -4   0 487.933 49.8199   5
   4  -4   0 588.606 49.7732   1
  -4  -4   0 638.300 50.0237   4
   4  -4   0 491.118 49.7283   2
  -4  -4   0 593.717 49.8302   8
  -4  -4   0 599.103 49.7635   8
   4  -4   0 460.265 49.8899   7
  -4  -4   0 495.964 49.7800   6
  -4  -4   0 563.203 49.5065   3
   4   4   0 635.761 49.8271   8
   4   4   0 477.509 49.8428   4
   4   4   0 597.444 49.8128   8
  -4   4   0 611.108 49.7985   1
  -4   4   0 490.915 49.7401   2
  -4   4   0 579.626 49.8057   8
  -4   4   0 489.438 49.8407   5
  -4   4   0 522.861 49.9458   4
   4   4   0 592.122 49.8128   7
   4   4   0 595.997 49.7177   5
  -4   4   0 560.273 49.7724   1
  -4   4   0 593.250 49.8035   8
  -4   4   0 495.629 49.9028   7
   4   4   0 585.258 49.7621   1
   4   4   0 482.982 49.7939   6
   4   4   0 598.984 49.7609   1
  -5  -4   0 19.2766 2.79281   8
   5  -4   0 18.9363 2.79681   2
  -5  -4   0 25.0521 3.19001   1
  -5  -4   0 18.1667 2.94113   5
   5  -4   0 16.8833 2.78796   8
   5  -4   0 26.1860 3.37321   1
  -5  -4   0 25.0102 3.50576   4
   5  -4   0 18.9167 2.97214   8
   5  -4   0 24.9340 3.26227   1
  -5  -4   0 28.0480 3.06382   8
  -5  -4   0 21.2651 2.95293   6
   5  -4   0 19.5024 3.48457   7
   5  -4   0 20.7207 3.22117   5
   5   4   0 22.4361 3.30369   5
   5   4   0 24.2317 3.34307   8
   5   4   0 17.0017 3.37172   4
   5   4   0 23.9169 3.34439   7
   5   4   0 17.2872 3.03932   6
   5   4   0 23.7916 2.93373   1
  -5   4   0 17.7116 2.80644   2
   5   4   0 28.8988 3.35466   1
  -5   4   0 25.2973 3.93784   4
  -5   4   0 24.1556 3.34093   5
  -5   4   0 18.1958 3.38702   7
  -5   4   0 17.4631 2.76135   1
   5   4   0 19.7130 2.91384   8
  -5   4   0 23.2529 2.99668   8
  -5   4   0 22.0913 3.32804   1
  -5   4   0 20.6728 2.97486   8
   6  -4   0 259.261 21.3218   8
  -6  -4   0 248.335 21.2698   8
   6  -4   0 199.615 21.4817   7
  -6  -4   0 225.007 21.4453   4
  -6  -4   0 257.689 21.2727   1
  -6  -4   0 204.491 21.1519   5
  -6  -4   0 238.917 21.2492   8
   6  -4   0 217.597 21.4063   5
   6  -4   0 250.120 21.2944   8
  -6  -4   0 213.970 21.2642   6
   6  -4   0 251.427 21.2946   1
  -6  -4   0 262.906 21.3414   7
   6  -4   0 202.513 21.1375   2
  -6  -4   0 250.067 21.2191   1
   6  -4   0 241.654 21.2278   1
   6  -4   0 216.741 21.4648   4
   6   4   0 242.508 21.2433   1
  -6   4   0 254.435 21.2791   1
   6   4   0 215.360 21.1684   5
   6   4   0 266.649 21.3092   8
  -6   4   0 219.043 21.5744   4
   6   4   0 208.315 21.5211   4
  -6   4   0 216.190 21.4754   7
  -6   4   0 243.388 21.3095   8
   6   4   0 248.949 21.2097   1
   6   4   0 217.051 21.3072   6
  -6   4   0 207.502 21.3255   5
   6   4   0 249.596 21.3254   8
  -6   4   0 233.928 21.2968   8
  -6   4   0 220.144 21.2393   1
   6   4   0 255.304 21.3561   7
  -6   4   0 218.963 21.2205   2
  -7  -4   0 36.0405 4.42543   1
   7  -4   0 36.4787 4.35203   2
   7  -4   0 34.4844 4.81964   8
  -7  -4   0 34.4415 5.23250   4
   7  -4   0 43.0864 4.76337   1
   7  -4   0 30.6060 4.38135   5
   7  -4   0 38.7058 4.54458   1
  -7  -4   0 39.8064 4.57884   1
  -7  -4   0 30.8542 4.70548   5
   7  -4   0 39.0474 4.67167   8
  -7  -4   0 35.5130 4.62641   8
  -7  -4   0 36.7855 4.60874   6
   7  -4   0 37.2680 5.51450   4
  -7  -4   0 47.2856 4.75062   8
  -7  -4   0 41.8669 4.94587   7
   7  -4   0 32.5613 5.31654   7
  -7   4   0 38.9767 4.58423   1
   7   4   0 38.2384 4.60828   1
  -7   4   0 35.5146 4.93631   7
   7   4   0 33.4350 4.42276   5
  -7   4   0 36.7403 4.80241   8
  -7   4   0 41.0034 4.82146   8
  -7   4   0 35.8833 4.57272   5
   7   4   0 34.5414 5.24567   4
   7   4   0 34.4188 4.63689   7
   7   4   0 35.7077 4.82629   8
  -7   4   0 35.8264 5.24901   4
  -7   4   0 38.4493 4.55806   2
  -7   4   0 36.2355 4.62607   1
   7   4   0 39.9600 4.69996   8
   7   4   0 32.8936 4.66751   6
   7   4   0 35.3762 4.78738   1
   8  -4   0 82.7172 7.84360   2
   8  -4   0 72.5239 8.03725   8
  -8  -4   0 86.2821 7.98892   7
  -8  -4   0 72.7370 7.87484   1
  -8  -4   0 77.0289 7.95918   5
  -8  -4   0 78.3394 8.02069   8
   8  -4   0 90.2474 7.98874   1
   8  -4   0 72.5903 7.78329   8
   8  -4   0 84.0539 8.04318   1
  -8  -4   0 65.4843 8.50920   4
   8  -4   0 76.5286 8.02133   5
  -8  -4   0 81.8426 7.98208   8
   8  -4   0 85.6627 8.72563   4
  -8  -4   0 67.9143 7.94414   6
  -8  -4   0 72.9662 7.34232   2
   8  -4   0 64.4647 8.42088   7
   8   4   0 80.6341 8.19499   5
  -8   4   0 86.4242 7.99744   1
   8   4   0 78.6696 8.01825   1
  -8   4   0 78.8597 8.06527   2
  -8   4   0 80.6503 7.99309   1
   8   4   0 83.3670 8.06243   7
   8   4   0 80.8436 7.98883   8
   8   4   0 58.1732 8.45003   4
   8   4   0 92.0316 8.29070   8
  -8   4   0 81.7848 8.58174   4
  -8   4   0 71.6167 8.39764   5
   8   4   0 86.0535 7.95042   1
  -8   4   0 81.1475 7.87686   8
  -8   4   0 82.1450 8.09381   8
  -8   4   0 73.5282 8.38916   7
   8   4   0 69.1998 8.02472   6
   9  -4   0 79.8957 8.99585   5
   9  -4   0 69.9122 7.81093   2
   9  -4   0 73.4281 8.53725   7
   9  -4   0 84.5681 8.14109   8
   9  -4   0 88.5078 8.10934   1
  -9  -4   0 77.3546 8.31214   6
   9  -4   0 73.7377 8.75095   4
  -9  -4   0 75.6710 8.15161   5
  -9  -4   0 79.2723 8.14365   7
  -9  -4   0 72.6539 8.01370   1
  -9  -4   0 80.4152 8.83276   4
   9  -4   0 78.6192 8.31197   8
  -9  -4   0 77.2808 7.99287   1
  -9  -4   0 79.0445 8.10853   8
  -9  -4   0 74.9703 8.09120   8
  -9  -4   0 81.2771 7.52107   2
   9  -4   0 87.4434 8.25506   1
   9   4   0 83.9186 8.21928   1
   9   4   0 68.5609 8.17178   6
  -9   4   0 62.3096 7.99648   1
  -9   4   0 76.7680 7.95903   2
   9   4   0 82.7767 8.11226   1
  -9   4   0 77.7413 8.74385   4
   9   4   0 74.0480 8.08801   5
   9   4   0 75.0887 8.72372   4
  -9   4   0 83.3983 8.08825   1
  -9   4   0 70.3578 8.02581   8
   9   4   0 83.8548 8.35819   8
   9   4   0 97.3891 8.58817   7
  -9   4   0 77.2652 8.23253   5
   9   4   0 75.4058 8.08634   8
  -9   4   0 84.6492 8.23269   8
  -9   4   0 77.1417 8.54391   7
  10  -4   0 96.1331 9.53918   2
  10  -4   0 101.092 9.90671   1
 -10  -4   0 102.473 9.25510   2
  10  -4   0 91.2447 9.77048   8
  10  -4   0 81.5640 10.1636   7
 -10  -4   0 95.0755 9.84984   8
 -10  -4   0 93.4767 9.78891   8
 -10  -4   0 96.7686 9.79139   1
  10  -4   0 95.9432 10.5543   4
 -10  -4   0 95.5189 9.83888   6
 -10  -4   0 113.976 10.0582   5
 -10  -4   0 104.855 9.87864   7
  10  -4   0 95.0787 9.77951   8
 -10   4   0 102.069 10.3851   5
  10   4   0 98.3858 9.95522   1
  10   4   0 99.6919 9.77096   8
 -10   4   0 101.605 9.68533   2
  10   4   0 89.5045 9.89742   7
  10   4   0 93.7729 10.5366   4
  10   4   0 97.4491 9.74115   8
 -10   4   0 97.6016 9.87953   8
 -10   4   0 80.7745 9.79911   8
  10   4   0 105.652 9.94028   5
 -10   4   0 96.8400 9.79593   1
 -10   4   0 95.5047 9.90346   1
 -10   4   0 98.7446 10.5747   7
 -11  -4   0 6.31248 2.48336   8
  11  -4   0 5.63292 2.50881   8
  11  -4   0 4.61567 3.04311   7
 -11  -4   0 6.91275 2.52442   6
 -11  -4   0 8.94507 2.99687   7
 -11  -4   0 3.98088 2.23597   1
 -11  -4   0 5.37826 2.70956   5
 -11  -4   0 2.13347 2.39022   8
 -11  -4   0 5.46918 1.61923   2
  11  -4   0 4.64362 2.57148   1
  11  -4   0 4.21819 2.79083   4
  11  -4   0 8.04810 2.13006   2
  11  -4   0 4.13608 2.74182   8
  11   4   0 8.19942 2.52090   8
  11   4   0 6.34643 2.50613   1
  11   4   0 5.85073 3.11075   7
  11   4   0 7.27562 2.75124   8
 -11   4   0 4.58235 2.55097   8
 -11   4   0 5.01849 2.13016   2
  11   4   0 7.57043 2.40267   1
 -11   4   0 7.34145 2.53258   1
  11   4   0 1.70129 3.48053   4
 -11   4   0 4.91146 3.28833   5
 -11   4   0 1.01889 2.21458   8
  12  -4   0 24.0799 5.03175   4
 -12  -4   0 27.8273 3.81627   1
  12  -4   0 26.5326 4.56314   7
 -12  -4   0 26.9669 3.57784   2
  12  -4   0 23.7211 4.25774   8
  12  -4   0 22.1044 3.52930   2
 -12  -4   0 28.4585 4.33321   5
  12  -4   0 22.8577 4.01560   1
  12  -4   0 19.4916 3.87070   8
 -12  -4   0 25.9969 3.81815   8
 -12  -4   0 19.4065 3.66543   8
 -12   4   0 24.3770 3.91455   1
  12   4   0 24.7574 3.94112   1
 -12   4   0 17.0084 3.82041   8
 -12   4   0 24.3582 3.74624   8
 -12   4   0 25.5348 3.64918   2
  12   4   0 18.9971 3.44853   8
  12   4   0 25.9385 4.22265   7
  12   4   0 28.6019 4.60541   4
  12   4   0 23.5540 4.11789   8
 -12   4   0 25.7725 4.80225   5
 -13  -4   0 50.2000 6.34395   5
  13  -4   0 35.4426 5.96886   7
 -13  -4   0 53.7484 7.10499   8
  13  -4   0 43.6565 6.02696   8
  13  -4   0 43.8225 6.50101   8
 -13  -4   0 35.9456 5.79572   8
 -13  -4   0 44.3804 5.81850   1
  13  -4   0 39.1225 6.58448   4
  13  -4   0 28.7530 5.38332   1
 -13  -4   0 46.0503 5.10776   2
 -13   4   0 41.3480 6.20482   1
  13   4   0 42.2043 6.98620   4
  13   4   0 45.4365 6.33035   7
 -13   4   0 41.0005 6.05086   8
 -13   4   0 49.1856 5.85761   2
  13   4   0 42.3862 5.87600   8
 -13   4   0 42.6944 6.03447   8
  13   4   0 47.9433 6.44345   8
  13   4   0 45.8856 6.32324   1
 -13   4   0 59.7871 7.07600   5
  14  -4   0 73.8790 9.73419   1
  14  -4   0 79.9615 10.3694   7
 -14  -4   0 95.2102 8.76426   2
 -14  -4   0 97.0258 9.61769   8
  14  -4   0 96.0913 10.1188   4
  14  -4   0 84.0939 9.94123   8
 -14  -4   0 76.6018 9.33247   1
 -14  -4   0 98.5660 9.93572   5
  14   4   0 81.6865 9.66571   7
  14   4   0 91.8461 9.62455   1
 -14   4   0 94.4588 9.90507   5
 -14   4   0 79.1572 9.19462   8
 -14   4   0 86.1712 9.69145   8
 -14   4   0 98.8687 9.41998   2
  14   4   0 90.4706 9.98143   4
  14   4   0 86.1112 9.91879   8
  14   4   0 82.9682 9.53769   8
 -14   4   0 74.1345 9.46115   1
 -15  -4   0 138.708 12.6671   5
 -15  -4   0 121.025 12.0909   1
 -15  -4   0 112.289 12.1595   8
 -15  -4   0 136.485 11.3464   2
  15  -4   0 107.928 12.5562   7
  15  -4   0 104.602 12.4273   8
  15  -4   0 124.512 12.3731   1
  15  -4   0 113.448 13.3068   4
 -15   4   0 143.872 13.3109   5
 -15   4   0 111.149 12.2228   8
  15   4   0 114.056 12.5991   7
  15   4   0 93.6287 12.1170   8
  15   4   0 96.9422 12.2211   1
  15   4   0 112.369 12.1499   8
  15   4   0 110.320 13.0125   4
 -15   4   0 139.175 12.0537   2
 -15   4   0 104.548 12.2600   8
 -15   4   0 106.310 12.2402   1
  16  -4   0 18.9769 5.73819   4
  16  -4   0 18.2231 4.65456   8
 -16  -4   0 20.6040 4.16298   1
 -16  -4   0 21.3840 4.10858   8
 -16  -4   0 29.3580 5.22230   5
  16  -4   0 29.8822 5.39717   7
 -16  -4   0 23.4337 3.40638   2
  16  -4   0 28.3446 4.79601   1
  16   4   0 22.5553 4.44655   1
 -16   4   0 22.9147 4.41411   8
 -16   4   0 27.7284 3.98306   2
 -16   4   0 17.2705 4.13952   1
  16   4   0 25.1068 4.69935   8
  16   4   0 10.9414 5.14164   4
 -16   4   0 29.6132 5.89051   5
  16   4   0 18.1425 4.71003   7
  17  -4   0 2.94122 3.42249   1
 -17  -4   0 5.59836 3.81167   5
 -17  -4   0 6.61504 3.13224   1
  17  -4   0 10.8130 4.19623   4
 -17  -4   0 1.91123 2.09326   2
  17  -4   0 8.63588 3.96527   8
 -17  -4   0 6.09308 3.10171   8
  17  -4   0 3.22054 4.37316   7
  17   4   0 5.03453 4.77255   4
 -17   4   0 -2.2765 2.91671   8
  17   4   0 2.75450 3.57183   8
 -17   4   0 4.70939 2.87824   2
  17   4   0 3.22861 3.78672   7
 -17   4   0 2.81722 4.57040   5
 -17   4   0 0.26355 3.02227   1
  17   4   0 0.70123 3.25673   1
  18  -4   0 12.0333 5.26905   7
  18  -4   0 10.5291 4.89342   4
 -18  -4   0 15.2294 3.69102   1
  18  -4   0 19.8588 4.47445   1
 -18  -4   0 13.8969 4.58692   5
 -18   4   0 16.5583 4.03984   1
 -18   4   0 12.0606 3.98701   8
  18   4   0 8.82525 3.99243   1
 -18   4   0 11.6389 5.28498   5
  18   4   0 9.82268 4.08546   8
  18   4   0 16.9134 4.59569   7
  18   4   0 8.94902 5.42440   4
 -18   4   0 17.8303 3.61882   2
  19  -4   0 -1.6408 3.98511   7
 -19  -4   0 1.43899 2.86112   1
  19  -4   0 3.26592 4.46764   4
 -19  -4   0 3.36951 4.74682   5
  19  -4   0 2.29459 3.66108   1
  19   4   0 2.73913 4.96142   4
  19   4   0 1.06009 3.46361   1
 -19   4   0 2.93829 4.90452   5
 -19   4   0 -2.7892 2.96710   1
  19   4   0 1.47015 3.67726   8
  19   4   0 1.77456 3.52337   7
 -19   4   0 3.14286 3.18069   2
  20  -4   0 -1.3566 3.74060   1
 -20  -4   0 0.05012 3.08735   1
 -20  -4   0 2.90822 4.37374   5
  20  -4   0 2.78857 4.26730   4
  20  -4   0 2.18813 4.17474   7
  20   4   0 -2.8370 3.49595   1
 -20   4   0 0.59893 3.32716   1
 -20   4   0 -1.5384 4.73437   5
  20   4   0 1.25094 5.06334   4
  20   4   0 6.95553 4.17701   7
 -21  -4   0 5.40226 3.57890   1
  21  -4   0 -2.8662 4.17256   7
  21  -4   0 3.54322 4.11198   1
 -21  -4   0 10.0019 5.05928   5
  21   4   0 4.45138 5.56502   4
 -21   4   0 6.23352 3.78060   1
  21   4   0 9.69675 4.66075   7
  21   4   0 1.79437 3.96239   1
 -21   4   0 7.43813 5.60378   5
   0  -5   0 -0.2480 1.44489   6
   0  -5   0 1.27192 0.92281   5
   0  -5   0 0.85716 1.42419   8
   0  -5   0 0.06749 1.45293   8
   0  -5   0 1.49495 1.34225   1
   0  -5   0 0.72685 1.34128   1
   0  -5   0 0.68708 1.31167   2
   0   5   0 -0.7090 1.48300   8
   0   5   0 1.22423 1.27142   6
   0   5   0 0.54826 1.36740   1
   0   5   0 2.59464 1.40521   1
   0   5   0 1.31683 1.33657   2
   0   5   0 -1.4046 1.37377   8
  -1  -5   0 688.126 60.4907   8
  -1  -5   0 641.451 60.4521   1
  -1  -5   0 699.310 60.4616   1
  -1  -5   0 672.831 60.4735   8
  -1  -5   0 707.755 60.4248   2
   1  -5   0 643.056 60.4352   1
   1  -5   0 756.278 60.5120   2
   1  -5   0 679.751 60.4512   1
   1  -5   0 634.879 60.4770   8
   1  -5   0 703.667 60.4958   6
  -1  -5   0 577.002 60.4409   6
   1  -5   0 741.830 60.4021   5
  -1  -5   0 678.071 60.5362   4
   1  -5   0 670.020 60.4648   8
  -1   5   0 607.153 60.4798   8
   1   5   0 697.103 60.4411   2
   1   5   0 680.795 60.4515   1
  -1   5   0 639.165 60.4598   8
   1   5   0 674.733 60.4938   8
  -1   5   0 752.306 60.4370   5
  -1   5   0 727.939 60.5155   6
   1   5   0 689.896 60.5370   4
   1   5   0 682.359 60.5200   6
  -1   5   0 678.751 60.6736   7
   1   5   0 646.152 60.4875   8
  -1   5   0 727.120 60.5088   2
   1   5   0 644.383 60.4616   1
  -1   5   0 629.208 60.4452   1
  -1   5   0 688.774 60.4676   1
   2  -5   0 2032.59 170.617   7
  -2  -5   0 1998.84 170.398   8
   2  -5   0 1785.30 170.315   1
  -2  -5   0 1967.78 170.367   1
  -2  -5   0 1926.49 170.327   1
  -2  -5   0 2084.40 170.475   4
   2  -5   0 2032.75 170.369   6
  -2  -5   0 1960.91 170.411   6
   2  -5   0 1992.34 170.375   8
  -2  -5   0 1638.93 170.244   2
  -2  -5   0 1995.16 170.365   8
   2  -5   0 1879.93 170.341   1
   2  -5   0 2037.34 170.408   8
   2  -5   0 2155.40 170.416   2
   2  -5   0 1627.28 170.298   5
  -2   5   0 1812.48 170.381   2
  -2   5   0 1712.52 170.331   5
   2   5   0 2029.72 170.384   8
  -2   5   0 1925.48 170.372   8
   2   5   0 1608.06 170.251   2
   2   5   0 1756.72 170.295   3
  -2   5   0 2000.57 170.401   8
   2   5   0 1927.11 170.369   1
  -2   5   0 2046.94 170.383   6
   2   5   0 1991.45 170.351   1
   2   5   0 1875.27 170.376   8
  -2   5   0 1840.61 170.348   1
  -2   5   0 1949.46 170.350   1
   2   5   0 2036.80 170.475   4
  -3  -5   0 1299.28 108.042   4
  -3  -5   0 1372.99 107.729   5
  -3  -5   0 1264.14 107.883   8
  -3  -5   0 1272.00 107.932   8
   3  -5   0 1259.89 107.878   1
   3  -5   0 1099.64 107.875   2
  -3  -5   0 1280.09 107.909   1
   3  -5   0 1271.00 107.899   8
   3  -5   0 1244.92 107.877   1
   3  -5   0 1283.16 107.925   8
   3  -5   0 1130.36 108.087   7
  -3  -5   0 1047.93 107.900   6
  -3  -5   0 1125.47 107.753   2
  -3  -5   0 1205.99 107.846   1
   3   5   0 1283.90 107.909   8
   3   5   0 1051.41 107.750   2
  -3   5   0 1253.26 107.883   1
  -3   5   0 1246.82 107.908   1
   3   5   0 1269.87 108.028   4
   3   5   0 1185.31 107.614   3
   3   5   0 1252.85 107.868   1
  -3   5   0 1047.43 107.874   2
  -3   5   0 1248.31 107.916   8
   3   5   0 1242.93 107.923   8
  -3   5   0 1303.58 107.953   8
   3   5   0 1048.68 107.910   6
   3   5   0 1210.97 107.889   1
  -3   5   0 1077.05 108.027   7
  -3   5   0 1282.55 107.882   6
  -4  -5   0 0.12146 1.73160   6
   4  -5   0 0.63264 1.55399   2
   4  -5   0 1.00125 1.52156   1
  -4  -5   0 1.10617 1.56039   1
   4  -5   0 1.32244 1.69174   1
   4  -5   0 -0.9451 1.30430   5
  -4  -5   0 2.35385 1.64047   8
  -4  -5   0 -0.3558 1.69344   8
  -4  -5   0 0.77688 1.11619   2
   4  -5   0 1.72591 2.05221   7
  -4  -5   0 -0.5958 1.24720   5
   4  -5   0 1.37286 1.67435   8
  -4  -5   0 0.51594 0.83180   3
  -4  -5   0 1.81088 2.10104   4
   4  -5   0 -1.5997 1.75024   8
  -4  -5   0 0.60241 1.55873   1
  -4   5   0 0.58732 2.17960   7
  -4   5   0 0.34557 1.76580   8
  -4   5   0 -0.6952 1.70200   2
  -4   5   0 3.04371 1.41594   6
  -4   5   0 2.56576 1.64382   1
   4   5   0 2.46921 2.30532   4
  -4   5   0 2.09224 1.67993   1
   4   5   0 1.32050 1.63677   1
   4   5   0 1.07790 1.92034   6
  -4   5   0 0.04200 1.60929   8
  -4   5   0 0.66970 1.45709   5
   4   5   0 1.19081 1.37031   5
   4   5   0 1.84456 1.71659   8
   5  -5   0 155.664 15.6850   2
   5  -5   0 185.189 15.7899   8
  -5  -5   0 170.325 15.7960   6
   5  -5   0 183.243 15.8539   8
  -5  -5   0 178.264 15.6874   1
   5  -5   0 158.642 15.8425   5
  -5  -5   0 156.469 15.4644   2
  -5  -5   0 174.618 15.7347   1
  -5  -5   0 164.112 15.8336   4
  -5  -5   0 157.892 15.5605   5
   5  -5   0 142.203 16.0065   7
   5  -5   0 188.751 15.7557   1
  -5  -5   0 180.123 15.7099   8
   5  -5   0 162.630 15.7109   1
  -5  -5   0 175.873 15.7872   8
  -5  -5   0 168.157 15.3009   3
  -5   5   0 153.194 15.8826   5
  -5   5   0 195.510 15.7928   1
   5   5   0 188.050 15.7779   1
  -5   5   0 149.707 15.7100   2
   5   5   0 143.406 15.6610   6
  -5   5   0 181.445 15.8330   8
  -5   5   0 139.407 15.9570   7
   5   5   0 173.139 16.0261   4
  -5   5   0 180.423 15.8176   8
  -5   5   0 166.982 16.0811   4
  -5   5   0 196.568 15.8207   1
   5   5   0 185.392 15.6980   1
   5   5   0 182.039 15.7840   8
   5   5   0 173.325 15.7551   7
   5   5   0 184.406 15.7597   8
  -6  -5   0 11.5282 3.03442   4
   6  -5   0 12.5628 2.33331   8
   6  -5   0 7.62671 2.18616   2
  -6  -5   0 10.1197 2.35178   8
  -6  -5   0 5.95265 2.04188   1
  -6  -5   0 14.5900 2.32161   1
   6  -5   0 9.04691 2.20752   1
   6  -5   0 12.9749 2.51889   8
   6  -5   0 9.73897 2.36005   1
  -6  -5   0 15.5419 2.06155   3
   6  -5   0 10.8723 2.75900   5
  -6  -5   0 14.6273 2.33560   8
  -6  -5   0 10.7427 2.24533   5
  -6  -5   0 11.6208 2.42677   6
   6  -5   0 5.88609 2.97403   7
   6   5   0 12.2493 2.47865   7
   6   5   0 12.6511 2.30885   1
  -6   5   0 15.8011 2.53470   1
   6   5   0 11.2783 2.35684   1
  -6   5   0 11.1406 2.33449   1
  -6   5   0 7.77933 2.20918   2
  -6   5   0 11.3638 2.96739   5
   6   5   0 13.2512 2.51821   8
   6   5   0 11.8838 2.61185   6
  -6   5   0 11.9799 2.50850   8
   6   5   0 11.3456 2.36405   8
  -6   5   0 9.50539 2.94984   7
   6   5   0 9.54950 3.01114   4
   6   5   0 12.3426 2.39514   5
  -6   5   0 10.1682 3.00998   4
  -6   5   0 9.48983 2.25202   8
   7  -5   0 266.373 24.1709   8
  -7  -5   0 287.328 24.0505   1
   7  -5   0 244.373 23.9607   2
   7  -5   0 255.500 24.2801   5
  -7  -5   0 251.896 24.0900   6
  -7  -5   0 248.387 23.9636   5
   7  -5   0 269.537 24.0339   1
   7  -5   0 286.904 24.1124   8
  -7  -5   0 264.360 24.4151   4
  -7  -5   0 299.896 24.1222   8
   7  -5   0 292.141 24.1282   1
   7  -5   0 224.422 24.3106   7
   7   5   0 284.151 24.0294   1
   7   5   0 244.408 24.1255   6
  -7   5   0 254.189 24.0882   8
   7   5   0 256.286 24.0450   7
   7   5   0 285.808 24.1661   8
   7   5   0 263.936 24.0480   5
  -7   5   0 235.519 24.0408   1
  -7   5   0 290.112 24.1140   1
   7   5   0 282.765 24.0660   1
  -7   5   0 232.547 24.2910   7
  -7   5   0 241.703 24.4151   4
   7   5   0 241.172 24.3844   4
  -7   5   0 260.966 24.0695   2
   7   5   0 304.316 24.1594   8
  -7   5   0 263.116 24.1103   8
  -7   5   0 247.423 24.2963   5
   8  -5   0 -1.9681 2.61264   7
   8  -5   0 -1.2833 2.10121   8
   8  -5   0 -1.6616 1.76780   5
  -8  -5   0 0.27222 1.93991   1
   8  -5   0 4.73325 2.00805   8
  -8  -5   0 1.19613 1.89197   5
  -8  -5   0 -4.1536 1.76714   8
  -8  -5   0 0.90875 1.86150   1
   8  -5   0 1.37088 1.75904   2
  -8  -5   0 0.18599 2.82186   4
  -8  -5   0 0.86911 1.96442   6
   8  -5   0 1.02398 2.00310   1
   8  -5   0 2.22676 1.83715   1
  -8   5   0 -1.7797 2.58663   7
  -8   5   0 6.56496 2.13013   1
  -8   5   0 0.27851 1.90268   1
   8   5   0 -0.5859 1.91663   5
  -8   5   0 2.97702 2.69569   4
   8   5   0 -0.6684 1.97856   8
   8   5   0 -0.8151 2.07837   6
  -8   5   0 -1.3308 2.05127   8
   8   5   0 1.44425 2.15974   8
  -8   5   0 1.01909 2.08440   8
   8   5   0 5.11511 2.11590   1
  -8   5   0 0.78818 1.81269   2
  -8   5   0 1.39103 2.63974   5
   8   5   0 0.12018 2.14512   7
   8   5   0 -0.7710 2.66971   4
   8   5   0 1.54728 1.96112   1
   9  -5   0 79.2811 9.53387   4
   9  -5   0 75.9752 9.69627   7
  -9  -5   0 92.0897 9.33132   8
   9  -5   0 95.3912 9.50004   1
  -9  -5   0 95.2967 9.27127   7
   9  -5   0 92.1564 9.53133   8
  -9  -5   0 91.2635 9.31637   8
   9  -5   0 92.0066 9.16208   2
   9  -5   0 104.199 9.30907   1
  -9  -5   0 93.2126 9.26378   5
  -9  -5   0 85.1599 9.10692   1
  -9  -5   0 89.8597 9.32595   1
  -9  -5   0 86.5689 9.32383   6
   9  -5   0 96.1655 9.34657   8
  -9   5   0 99.3427 9.55455   5
   9   5   0 100.895 9.54944   5
   9   5   0 108.863 9.59988   8
   9   5   0 87.0999 9.90877   4
  -9   5   0 85.8867 9.16512   8
   9   5   0 92.4136 9.37232   1
  -9   5   0 79.5078 9.21691   1
  -9   5   0 98.7224 9.40181   8
  -9   5   0 108.632 10.1171   4
  -9   5   0 93.4264 9.88447   7
  -9   5   0 83.1593 9.27745   1
   9   5   0 80.4499 9.33990   6
  -9   5   0 92.9015 9.25698   2
   9   5   0 96.6527 9.39964   7
   9   5   0 103.699 9.39411   8
  10  -5   0 6.19121 2.80207   4
 -10  -5   0 8.90870 2.63458   5
  10  -5   0 3.82128 2.01035   2
 -10  -5   0 5.38764 2.38936   6
  10  -5   0 3.32822 2.34086   8
 -10  -5   0 3.73349 2.26083   8
  10  -5   0 2.40020 3.11524   7
 -10  -5   0 4.28000 2.35074   8
  10  -5   0 5.96822 2.67418   8
 -10  -5   0 0.83293 2.10593   1
 -10  -5   0 1.03652 2.32005   7
 -10  -5   0 3.31046 1.40627   2
  10  -5   0 3.52023 2.31154   1
 -10   5   0 2.48662 2.41774   1
  10   5   0 0.15494 2.22103   1
 -10   5   0 2.94018 1.85927   8
 -10   5   0 1.58096 2.23254   1
  10   5   0 4.15552 2.51202   6
  10   5   0 0.00144 2.24350   8
 -10   5   0 2.77485 2.27947   8
  10   5   0 4.03171 3.27992   4
  10   5   0 6.80920 2.94992   5
  10   5   0 3.50754 2.61780   8
 -10   5   0 6.53057 3.13268   5
 -10   5   0 3.84024 2.36731   2
  10   5   0 7.49284 3.12876   7
  10   5   0 4.15868 2.54584   1
 -11  -5   0 3.39706 1.43749   2
  11  -5   0 7.32006 3.77077   4
 -11  -5   0 5.68753 2.50457   8
 -11  -5   0 2.35742 2.41762   5
  11  -5   0 0.17298 2.36185   8
  11  -5   0 2.69727 3.12684   7
 -11  -5   0 3.43938 2.13346   1
  11  -5   0 2.41825 2.68925   8
 -11  -5   0 2.66246 2.37849   8
 -11  -5   0 3.63375 2.50515   7
  11  -5   0 1.45038 2.27248   1
  11  -5   0 3.48288 2.05909   2
 -11   5   0 -1.4303 2.82535   5
  11   5   0 3.77273 2.41749   1
 -11   5   0 2.15291 2.41927   8
  11   5   0 1.54765 2.41565   1
  11   5   0 4.03265 2.79872   4
 -11   5   0 2.46861 2.61279   8
 -11   5   0 2.49743 2.35738   1
  11   5   0 1.35568 2.52352   5
 -11   5   0 -0.4564 1.93438   2
  11   5   0 0.97013 2.46200   8
  11   5   0 1.96777 2.57037   7
  11   5   0 3.98158 2.57391   6
  11   5   0 -0.8566 2.35668   8
 -12  -5   0 23.2223 3.49098   2
 -12  -5   0 22.2232 3.71398   1
 -12  -5   0 25.9239 4.16838   5
 -12  -5   0 16.0980 3.61915   8
  12  -5   0 25.3052 5.16616   4
  12  -5   0 20.5535 3.94792   8
  12  -5   0 20.4001 3.88498   1
  12  -5   0 18.2081 4.47771   7
  12  -5   0 28.7122 4.06399   8
 -12  -5   0 24.1917 3.93041   8
  12   5   0 26.5605 4.22737   8
 -12   5   0 31.1765 4.24908   2
 -12   5   0 21.4876 3.80104   8
 -12   5   0 22.6247 3.81495   1
  12   5   0 19.3725 3.87604   8
  12   5   0 29.1791 4.59131   7
 -12   5   0 23.2210 4.06385   8
  12   5   0 23.1675 4.41159   4
  12   5   0 19.3754 3.93559   1
 -12   5   0 25.7270 4.30717   5
 -13  -5   0 75.2534 9.00774   1
  13  -5   0 78.2896 9.33420   1
  13  -5   0 70.3499 9.38165   8
 -13  -5   0 105.957 9.62000   5
  13  -5   0 97.1943 10.4710   4
 -13  -5   0 88.1371 9.27258   8
  13  -5   0 85.5163 10.2906   7
 -13  -5   0 96.1810 8.49315   2
  13   5   0 87.8950 10.2282   4
 -13   5   0 93.7917 9.02658   2
  13   5   0 82.2441 9.47096   8
 -13   5   0 69.7097 9.23781   8
 -13   5   0 76.1811 9.31413   1
  13   5   0 80.3445 9.26831   8
  13   5   0 90.7447 9.75012   7
 -13   5   0 68.5734 9.17284   8
  13   5   0 80.6826 9.24149   1
 -13   5   0 101.846 9.69357   5
  14  -5   0 54.0386 9.39461   4
 -14  -5   0 86.4269 8.64770   5
 -14  -5   0 61.2612 8.23065   8
  14  -5   0 64.7837 8.45553   1
  14  -5   0 78.2184 9.06625   7
  14  -5   0 72.6505 8.26899   8
 -14  -5   0 86.0983 7.38094   2
 -14  -5   0 57.3208 8.18773   1
 -14   5   0 95.3737 9.54562   5
 -14   5   0 59.2199 8.42111   1
  14   5   0 66.1018 8.53541   8
  14   5   0 58.8001 8.33256   8
 -14   5   0 84.8018 8.10049   2
  14   5   0 84.2763 9.53793   4
 -14   5   0 67.1202 8.42374   8
  14   5   0 69.3487 8.35349   1
 -14   5   0 57.2949 8.27349   8
  14   5   0 75.1653 8.59787   7
 -15  -5   0 54.1057 6.67673   5
  15  -5   0 34.0290 6.02502   8
  15  -5   0 33.6543 5.86588   1
 -15  -5   0 41.8304 6.19201   1
  15  -5   0 34.4119 6.35671   7
 -15  -5   0 41.7909 6.36824   8
  15  -5   0 60.5562 8.25771   4
 -15  -5   0 47.1904 5.18863   2
  15   5   0 52.8560 7.75755   4
 -15   5   0 50.8212 7.74128   5
  15   5   0 39.7203 5.95481   8
  15   5   0 35.8117 5.91488   8
 -15   5   0 44.2799 6.19138   8
 -15   5   0 50.6633 6.36402   2
 -15   5   0 36.1553 5.76929   8
  15   5   0 45.8956 6.74242   1
  15   5   0 37.5146 6.30443   7
 -15   5   0 39.1211 5.76161   1
 -16  -5   0 33.3631 5.31386   8
 -16  -5   0 35.0042 5.20707   1
 -16  -5   0 39.9341 5.99277   5
  16  -5   0 35.0731 5.84088   8
  16  -5   0 44.1144 7.30760   4
  16  -5   0 32.1039 6.30471   7
  16   5   0 34.2226 5.44164   1
  16   5   0 32.9392 5.52791   7
 -16   5   0 44.2239 6.37269   8
  16   5   0 39.5722 6.34041   4
  16   5   0 34.1643 5.67811   8
 -16   5   0 33.0856 5.28399   1
 -17  -5   0 2.90852 3.53018   5
 -17  -5   0 0.80369 2.68408   1
  17  -5   0 5.67840 3.57820   1
 -17  -5   0 0.07354 2.82665   8
  17  -5   0 -4.0424 3.55565   4
  17  -5   0 -7.1761 3.92340   7
  17  -5   0 3.87152 3.68829   8
 -17   5   0 1.37250 3.28869   8
  17   5   0 0.68692 3.17656   1
 -17   5   0 -2.2273 2.87592   1
 -17   5   0 1.53821 2.88897   2
 -17   5   0 6.13841 4.64796   5
  17   5   0 -0.6551 3.13338   7
  17   5   0 -0.4049 4.23147   4
  17   5   0 -0.0707 3.10776   8
  18  -5   0 5.24698 5.23811   4
  18  -5   0 2.87407 4.44832   7
 -18  -5   0 0.73883 4.08620   5
 -18  -5   0 6.06496 3.09565   1
  18  -5   0 1.99508 3.54072   1
  18   5   0 2.86770 3.65320   8
  18   5   0 4.75588 3.21529   1
 -18   5   0 5.22078 3.49537   8
 -18   5   0 0.55322 3.14686   2
 -18   5   0 3.31122 4.62032   5
  18   5   0 -1.0463 3.69737   7
 -18   5   0 2.18997 3.19003   1
  18   5   0 4.86647 4.96164   4
 -19  -5   0 16.2612 5.48621   5
  19  -5   0 14.4291 5.40876   7
 -19  -5   0 11.2423 3.74748   1
  19  -5   0 14.8791 4.63716   1
  19   5   0 14.4665 4.61881   7
 -19   5   0 20.4326 4.14824   2
  19   5   0 20.1382 6.15524   4
 -19   5   0 8.99388 4.06820   1
 -19   5   0 10.4304 5.51648   5
  19   5   0 12.9186 4.31046   1
  19   5   0 9.41390 4.45378   8
  20  -5   0 5.28856 4.62163   7
  20  -5   0 4.76201 4.24173   1
 -20  -5   0 10.1221 4.68756   5
 -20  -5   0 8.61629 3.66444   1
  20   5   0 2.91065 3.83826   1
 -20   5   0 10.0365 4.00528   1
 -20   5   0 12.8837 5.64665   5
  20   5   0 4.33159 5.35824   4
  20   5   0 8.62047 3.98842   7
 -21  -5   0 16.2135 4.31812   1
 -21  -5   0 18.0270 5.41217   5
  21  -5   0 8.04923 4.86538   7
  21  -5   0 6.85155 4.29760   1
 -21   5   0 9.60830 4.31857   1
  21   5   0 5.05936 3.99425   7
  21   5   0 1.97121 3.94362   1
 -21   5   0 12.2127 5.93789   5
  21   5   0 12.5223 6.00698   4
   0  -6   0 41.0211 4.89291   1
   0  -6   0 49.4352 4.53946   5
   0  -6   0 50.6810 5.07577   6
   0  -6   0 44.2289 4.99217   1
   0  -6   0 40.5959 5.04972   8
   0  -6   0 45.2848 5.01937   8
   0  -6   0 50.5932 4.91823   2
   0   6   0 46.5156 5.15687   8
   0   6   0 39.7445 4.90196   1
   0   6   0 41.4217 5.08916   8
   0   6   0 37.5181 5.06615   1
   0   6   0 55.9669 5.17243   6
   0   6   0 52.1188 5.04196   2
   1  -6   0 714.710 63.2547   8
  -1  -6   0 737.211 63.1603   2
   1  -6   0 699.703 63.2219   8
   1  -6   0 658.343 63.1701   1
   1  -6   0 768.472 63.2466   2
   1  -6   0 766.622 63.1125   5
   1  -6   0 704.643 63.1876   1
  -1  -6   0 688.528 63.2725   4
  -1  -6   0 690.240 63.1978   1
  -1  -6   0 689.388 63.1893   1
   1  -6   0 752.549 63.2514   6
  -1  -6   0 732.452 63.2774   6
  -1  -6   0 715.658 63.2297   8
  -1  -6   0 698.739 63.2310   8
   1   6   0 686.295 63.2291   8
  -1   6   0 653.606 63.1896   1
   1   6   0 732.972 63.1916   2
  -1   6   0 725.726 63.2521   6
  -1   6   0 744.558 63.2525   2
  -1   6   0 739.418 63.2224   1
  -1   6   0 666.863 63.2168   8
  -1   6   0 648.557 63.2398   8
   1   6   0 719.195 63.2121   1
  -1   6   0 740.637 63.1364   5
   1   6   0 726.963 63.2823   6
   1   6   0 668.751 63.2018   1
   1   6   0 663.780 63.2302   8
   1   6   0 691.536 63.2813   4
  -2  -6   0 1493.76 144.271   4
  -2  -6   0 1779.29 144.263   5
  -2  -6   0 1680.00 144.144   2
   2  -6   0 1587.27 144.242   8
  -2  -6   0 1622.22 144.237   8
  -2  -6   0 1560.07 144.207   1
   2  -6   0 1816.16 144.218   5
  -2  -6   0 1367.83 144.211   6
   2  -6   0 1522.02 144.464   7
  -2  -6   0 1630.25 144.219   8
   2  -6   0 1619.74 144.194   1
   2  -6   0 1637.90 144.237   2
  -2  -6   0 1588.24 144.178   1
   2  -6   0 1584.05 144.205   8
   2  -6   0 1668.13 144.228   6
   2  -6   0 1549.97 144.184   1
  -2   6   0 1616.13 144.239   8
   2   6   0 1725.00 144.229   1
  -2   6   0 1682.08 144.273   8
  -2   6   0 1482.98 144.187   1
   2   6   0 1592.35 144.146   2
   2   6   0 1625.28 144.252   8
   2   6   0 1584.13 144.212   1
   2   6   0 1730.04 144.331   6
   2   6   0 1703.77 144.268   8
  -2   6   0 1657.64 144.234   6
  -2   6   0 1661.51 144.212   1
   2   6   0 1640.30 144.315   4
   3  -6   0 186.503 15.9978   6
   3  -6   0 178.121 15.9950   1
   3  -6   0 165.295 16.0531   2
   3  -6   0 177.411 16.0244   8
  -3  -6   0 205.074 15.7333   5
  -3  -6   0 140.221 15.9389   6
  -3  -6   0 173.458 15.9776   1
  -3  -6   0 168.275 16.1853   4
  -3  -6   0 178.158 16.0229   8
   3  -6   0 178.062 16.0150   1
  -3  -6   0 183.843 16.1058   8
   3  -6   0 153.728 16.4547   7
   3  -6   0 182.507 16.1098   8
   3  -6   0 137.212 15.9273   5
  -3  -6   0 169.395 16.0045   1
  -3   6   0 174.311 16.0668   8
   3   6   0 195.617 15.7301   5
  -3   6   0 179.235 16.1075   8
   3   6   0 196.193 16.0627   1
  -3   6   0 188.654 16.0937   1
   3   6   0 184.138 16.2286   4
  -3   6   0 152.411 16.3241   7
   3   6   0 155.079 15.6355   3
   3   6   0 182.039 16.1179   8
   3   6   0 199.554 16.1073   8
  -3   6   0 144.307 16.0127   5
  -3   6   0 147.565 15.9373   6
  -3   6   0 175.551 15.9998   1
   3   6   0 185.986 16.1858   6
  -3   6   0 192.783 16.1591   2
   3   6   0 166.923 15.8858   2
   3   6   0 184.430 16.0643   1
  -4  -6   0 608.793 62.8580   6
   4  -6   0 716.745 62.8667   1
  -4  -6   0 761.060 62.9348   8
   4  -6   0 756.461 62.8784   1
   4  -6   0 628.219 62.8450   2
   4  -6   0 752.691 62.9372   8
   4  -6   0 623.482 62.8827   5
  -4  -6   0 599.678 62.6519   2
   4  -6   0 757.285 62.8973   8
  -4  -6   0 733.442 63.0686   4
   4  -6   0 681.545 63.1719   7
  -4  -6   0 708.452 62.8178   1
  -4  -6   0 634.076 62.6346   5
  -4  -6   0 756.323 62.9031   1
  -4  -6   0 746.559 62.8903   8
  -4   6   0 754.381 62.9592   8
  -4   6   0 642.174 63.0810   7
   4   6   0 617.510 62.8871   6
  -4   6   0 632.933 62.8826   2
  -4   6   0 630.971 62.9216   5
   4   6   0 836.446 62.9656   8
   4   6   0 767.964 62.8617   1
  -4   6   0 757.077 62.9308   1
  -4   6   0 690.523 62.8264   6
  -4   6   0 812.699 62.9337   1
   4   6   0 728.356 62.9206   8
  -4   6   0 771.501 62.9799   8
   4   6   0 715.928 62.8789   1
   4   6   0 615.877 62.9872   4
  -5  -6   0 259.372 21.7962   1
   5  -6   0 200.304 22.1294   7
  -5  -6   0 235.002 21.5603   5
   5  -6   0 213.366 21.8359   5
  -5  -6   0 253.085 21.8010   8
  -5  -6   0 234.484 21.6931   1
   5  -6   0 248.094 21.8638   8
   5  -6   0 212.651 21.7469   2
  -5  -6   0 210.463 21.2890   3
   5  -6   0 252.785 21.8066   8
  -5  -6   0 220.171 21.7980   6
   5  -6   0 273.920 21.8098   1
  -5  -6   0 262.653 21.8722   8
  -5  -6   0 220.959 21.9507   4
   5  -6   0 246.121 21.7824   1
  -5  -6   0 210.348 21.4874   2
  -5   6   0 221.316 21.9054   5
  -5   6   0 247.223 22.1710   4
   5   6   0 220.274 21.5490   5
   5   6   0 276.705 21.7838   1
  -5   6   0 240.134 21.8431   8
  -5   6   0 263.059 21.8571   1
  -5   6   0 238.190 21.8276   8
  -5   6   0 277.260 21.8465   1
  -5   6   0 208.082 21.7656   2
   5   6   0 256.439 21.7714   1
   5   6   0 243.825 22.0435   4
   5   6   0 253.907 21.8358   8
  -5   6   0 245.943 21.7364   6
   5   6   0 252.009 21.8882   7
   5   6   0 225.144 21.8835   6
  -5   6   0 208.217 22.0199   7
   5   6   0 274.619 21.8478   8
  -6  -6   0 222.816 19.2101   8
   6  -6   0 226.258 19.2731   8
  -6  -6   0 202.539 19.2049   6
   6  -6   0 228.105 19.1462   1
   6  -6   0 222.473 19.1601   1
  -6  -6   0 205.966 19.0202   1
  -6  -6   0 214.058 19.1144   1
   6  -6   0 222.107 19.1816   8
  -6  -6   0 207.418 18.9694   5
   6  -6   0 180.522 19.0350   2
   6  -6   0 172.202 19.3102   7
   6  -6   0 192.167 19.2464   5
  -6  -6   0 198.666 18.8045   2
  -6  -6   0 183.798 19.2189   4
  -6  -6   0 228.042 19.1496   8
  -6  -6   0 204.272 18.6217   3
   6   6   0 221.307 19.0882   1
   6   6   0 229.266 19.1878   8
   6   6   0 225.275 19.2188   8
  -6   6   0 205.228 19.1895   8
   6   6   0 226.545 19.2698   7
  -6   6   0 192.645 19.5064   4
  -6   6   0 208.185 18.9849   6
  -6   6   0 192.122 19.4321   7
  -6   6   0 188.543 19.3145   5
  -6   6   0 217.511 19.2072   8
  -6   6   0 213.703 19.1191   1
   6   6   0 184.172 19.0788   6
  -6   6   0 194.310 19.1347   2
   6   6   0 194.915 19.4251   4
   6   6   0 216.343 19.1089   1
  -6   6   0 228.853 19.2554   1
  -7  -6   0 24.6616 3.50866   6
   7  -6   0 26.6727 4.13159   5
  -7  -6   0 25.5555 2.82969   3
  -7  -6   0 18.8472 3.15249   1
  -7  -6   0 21.4882 3.32859   1
  -7  -6   0 23.6870 3.44808   8
  -7  -6   0 24.8944 4.08650   4
   7  -6   0 28.0831 3.79671   1
   7  -6   0 20.8474 3.24247   2
  -7  -6   0 23.1342 3.62323   5
   7  -6   0 22.1529 3.58853   8
   7  -6   0 25.2973 4.18898   7
  -7  -6   0 19.6871 3.22990   8
   7  -6   0 16.1033 3.27789   1
   7  -6   0 24.0698 3.40616   8
  -7   6   0 24.9960 3.44136   2
  -7   6   0 23.5588 3.93470   5
   7   6   0 31.3232 4.08362   7
  -7   6   0 19.0331 3.25568   1
   7   6   0 22.2101 4.15375   4
   7   6   0 27.4343 3.78487   1
   7   6   0 21.3829 3.31125   8
  -7   6   0 27.5248 4.20741   7
  -7   6   0 22.3896 4.14606   4
   7   6   0 27.1186 3.83175   5
  -7   6   0 22.1431 3.42098   8
  -7   6   0 26.1301 3.52100   1
   7   6   0 21.5961 3.45468   8
   7   6   0 17.6873 3.52198   6
   7   6   0 29.6488 3.85793   1
  -7   6   0 21.0669 3.49788   8
  -8  -6   0 16.1624 2.88801   1
   8  -6   0 15.0547 2.82256   1
  -8  -6   0 15.9416 2.94054   8
   8  -6   0 11.7862 2.83192   1
   8  -6   0 19.4307 2.78363   8
  -8  -6   0 18.5395 3.35235   4
  -8  -6   0 15.4019 2.97103   6
   8  -6   0 15.3099 3.03596   8
  -8  -6   0 17.8673 2.82643   5
   8  -6   0 13.6833 2.73322   2
  -8  -6   0 16.6715 2.47196   3
   8  -6   0 16.7824 3.73860   7
   8  -6   0 13.6665 2.90900   5
  -8  -6   0 16.6146 2.79843   1
  -8  -6   0 16.8188 2.96048   8
   8   6   0 17.7378 3.81394   4
   8   6   0 13.1900 3.18471   7
   8   6   0 16.2479 3.05478   8
  -8   6   0 20.4646 3.08350   1
   8   6   0 15.7770 2.88155   1
   8   6   0 18.8128 3.17016   6
  -8   6   0 15.2504 3.02133   8
   8   6   0 21.1618 3.22484   5
  -8   6   0 15.2374 2.81195   2
  -8   6   0 16.0611 3.72612   4
  -8   6   0 18.6748 3.80729   7
   8   6   0 13.6223 3.05555   8
  -8   6   0 14.0780 2.84511   1
  -8   6   0 12.2583 2.78741   8
  -8   6   0 13.9467 3.55700   5
   8   6   0 10.3047 2.79373   1
  -9  -6   0 3.27822 2.22236   8
   9  -6   0 2.55027 2.11470   1
  -9  -6   0 2.30161 1.98521   5
   9  -6   0 1.19444 2.13882   8
  -9  -6   0 1.88803 2.11477   8
  -9  -6   0 1.60871 1.60186   3
   9  -6   0 0.42574 2.94604   7
   9  -6   0 1.43129 2.26443   1
  -9  -6   0 3.22136 2.06875   1
   9  -6   0 1.89835 1.96224   8
   9  -6   0 1.34215 1.93702   2
  -9  -6   0 1.54351 2.09347   6
  -9   6   0 2.36788 2.16312   8
   9   6   0 -1.4536 2.23538   6
   9   6   0 -1.5018 2.07163   8
   9   6   0 -0.9468 2.98096   4
   9   6   0 -1.0995 2.11815   1
   9   6   0 2.70509 2.29090   1
  -9   6   0 -1.6810 1.93490   2
   9   6   0 1.65422 2.38410   7
   9   6   0 6.23615 2.40403   8
  -9   6   0 -0.6292 2.12501   1
  -9   6   0 0.74851 2.35237   8
  -9   6   0 -2.5998 2.00591   1
   9   6   0 -2.2394 2.00669   5
  -9   6   0 -3.5275 2.61320   5
  -9   6   0 -0.5527 2.75166   7
  10  -6   0 66.8449 6.87056   1
 -10  -6   0 58.8221 6.59388   5
  10  -6   0 66.7277 6.55293   2
 -10  -6   0 55.0007 6.75466   8
  10  -6   0 56.6118 6.98029   8
  10  -6   0 45.5969 7.32448   7
  10  -6   0 59.0185 6.72412   8
 -10  -6   0 56.4089 6.70573   1
  10   6   0 64.1685 6.89556   1
  10   6   0 50.5512 6.69333   7
  10   6   0 47.7882 7.36881   4
  10   6   0 65.6093 7.02702   5
 -10   6   0 56.9491 6.77275   8
 -10   6   0 54.3827 6.58741   1
  10   6   0 51.5289 6.76488   6
 -10   6   0 54.1922 6.68702   1
 -10   6   0 54.3603 6.43087   8
  10   6   0 70.3546 7.11306   8
 -10   6   0 63.5348 6.94903   2
 -10   6   0 56.3475 7.29169   5
  10   6   0 61.7104 6.77895   8
  11  -6   0 15.2833 4.08057   7
 -11  -6   0 4.39145 2.43245   1
 -11  -6   0 8.72288 2.74213   5
  11  -6   0 10.2329 2.92143   1
  11  -6   0 10.8230 2.88756   8
 -11  -6   0 7.08927 1.69757   2
 -11  -6   0 3.41261 2.47438   8
  11  -6   0 11.1616 3.16566   8
  11   6   0 12.5391 3.45893   5
  11   6   0 11.5164 3.05015   8
  11   6   0 8.87345 2.98881   6
 -11   6   0 4.96624 2.68034   8
 -11   6   0 5.73033 2.54318   1
  11   6   0 10.0426 3.83395   4
  11   6   0 7.71574 2.78549   8
  11   6   0 0.48263 3.91624   1
 -11   6   0 7.47715 3.42223   5
 -11   6   0 8.67422 2.54734   2
  11   6   0 10.1136 3.15996   7
 -11   6   0 8.49087 2.82453   8
  11   6   0 14.0550 2.99270   1
 -12  -6   0 22.1099 3.77816   1
  12  -6   0 28.6696 4.90069   7
  12  -6   0 20.4724 4.32752   8
  12  -6   0 26.0171 4.14268   8
 -12  -6   0 21.9375 3.38016   2
 -12  -6   0 22.0847 3.96473   8
 -12  -6   0 22.7808 4.27791   5
  12  -6   0 20.6809 4.12488   1
 -12   6   0 27.2309 4.35899   8
 -12   6   0 28.2734 4.99812   5
  12   6   0 15.4018 3.87520   8
 -12   6   0 20.9301 3.88841   1
  12   6   0 20.9655 4.06571   6
  12   6   0 28.4690 4.49676   7
  12   6   0 26.9607 4.69949   4
  12   6   0 19.8064 4.08769   8
 -12   6   0 25.7196 4.04279   2
 -12   6   0 20.4619 3.91005   8
  12   6   0 26.3387 4.18670   1
 -13  -6   0 32.3135 4.83655   5
  13  -6   0 23.5421 4.36333   1
 -13  -6   0 19.5077 4.05493   8
 -13  -6   0 30.1231 4.22982   1
  13  -6   0 24.7588 4.56906   8
 -13  -6   0 22.1464 3.54055   2
  13  -6   0 22.6535 4.86040   7
  13   6   0 21.0359 4.14939   1
 -13   6   0 27.1435 4.35065   8
 -13   6   0 24.1892 4.23043   1
  13   6   0 24.3659 4.18939   8
  13   6   0 32.9579 5.19116   4
  13   6   0 27.4199 4.34553   8
 -13   6   0 27.7671 5.30578   5
 -13   6   0 24.3539 4.14258   2
  13   6   0 38.0676 4.94685   7
 -13   6   0 22.2169 4.39061   8
 -14  -6   0 36.6092 5.11918   1
  14  -6   0 39.8565 5.54245   1
 -14  -6   0 34.1341 5.16989   8
  14  -6   0 31.9603 6.20692   7
  14  -6   0 32.3841 5.65442   8
 -14  -6   0 41.2230 5.86836   5
 -14  -6   0 41.1559 4.65656   2
  14   6   0 36.9349 6.46384   4
 -14   6   0 46.6814 6.09428   2
  14   6   0 28.9662 5.03546   8
 -14   6   0 40.3901 6.52047   5
  14   6   0 30.9206 5.19463   1
 -14   6   0 40.9607 5.65370   8
 -14   6   0 37.0658 5.38088   8
 -14   6   0 34.1095 5.24477   1
  14   6   0 43.3350 5.81465   7
  14   6   0 41.6384 5.54433   8
  15  -6   0 87.9282 11.0480   7
 -15  -6   0 104.991 9.46736   2
  15  -6   0 93.4421 10.9456   8
 -15  -6   0 94.8299 10.5478   5
 -15  -6   0 98.6685 10.5018   8
  15  -6   0 93.2168 10.6524   1
 -15  -6   0 82.1488 10.2033   1
 -15   6   0 117.034 10.6340   2
  15   6   0 79.6375 10.7250   8
  15   6   0 89.4264 10.4942   1
 -15   6   0 98.9909 10.5756   1
  15   6   0 87.8848 10.6160   8
  15   6   0 98.2899 11.5972   4
 -15   6   0 100.053 10.4017   8
 -15   6   0 116.148 11.8680   5
  15   6   0 92.9377 11.0167   7
 -16  -6   0 38.0058 4.82561   2
  16  -6   0 31.6238 5.69166   1
 -16  -6   0 35.0625 5.47094   8
  16  -6   0 36.7210 6.07475   8
 -16  -6   0 43.7570 6.22047   1
  16  -6   0 41.5659 6.87851   7
 -16  -6   0 48.0109 6.58310   5
  16   6   0 27.7770 5.36320   1
 -16   6   0 65.1809 6.29399   2
  16   6   0 25.6722 5.76660   8
  16   6   0 41.2320 7.16293   4
  16   6   0 41.6244 6.33462   7
 -16   6   0 32.7388 5.60330   8
 -16   6   0 42.3544 5.86525   1
 -17  -6   0 10.3340 4.01867   5
 -17  -6   0 14.0853 3.60126   1
  17  -6   0 3.64182 4.13246   8
  17  -6   0 11.6012 4.48633   7
  17  -6   0 15.5259 4.18314   1
  17   6   0 10.9905 3.95695   8
  17   6   0 8.03721 3.47106   1
 -17   6   0 8.28070 3.56341   2
 -17   6   0 6.57415 3.43794   1
 -17   6   0 1.63971 3.30787   8
  17   6   0 10.7491 5.08568   4
  17   6   0 11.6767 4.31087   7
 -17   6   0 12.9465 5.24916   5
 -18  -6   0 5.52302 3.36688   1
  18  -6   0 11.5041 4.29521   1
  18  -6   0 16.1031 4.87313   7
 -18  -6   0 12.6227 5.00571   5
  18   6   0 17.5254 5.77030   4
 -18   6   0 16.9065 4.20047   8
 -18   6   0 8.33497 3.84176   1
 -18   6   0 16.8782 4.72817   5
  18   6   0 14.4982 4.34104   8
  18   6   0 12.1515 4.54583   7
 -18   6   0 13.8328 3.90732   2
  18   6   0 8.36991 3.93224   1
 -19  -6   0 -0.1845 3.01407   1
 -19  -6   0 5.08431 4.68857   5
  19  -6   0 0.11991 3.71261   1
  19  -6   0 6.51076 4.49861   7
  19   6   0 7.75791 5.21922   4
 -19   6   0 0.26143 4.66991   5
  19   6   0 -1.0478 3.28727   1
 -19   6   0 4.43788 3.57872   1
  19   6   0 1.94044 4.07805   7
 -19   6   0 2.80336 3.26138   2
  19   6   0 -0.7564 3.68702   8
 -20  -6   0 7.16032 3.59793   1
  20  -6   0 8.99825 5.17437   7
  20  -6   0 8.27544 4.35991   1
  20   6   0 10.1247 4.14803   1
 -20   6   0 23.0887 6.44855   5
  20   6   0 7.10387 5.67265   4
 -20   6   0 9.24219 3.85596   2
 -20   6   0 11.1562 4.16249   1
 -21  -6   0 0.17232 4.24956   5
 -21  -6   0 1.15910 3.32593   1
 -21   6   0 0.31864 3.59288   1
   0  -7   0 0.59375 1.10175   5
   0  -7   0 1.00340 1.74395   8
   0  -7   0 -1.8664 1.56114   8
   0  -7   0 -0.8596 1.62128   1
   0  -7   0 0.62795 1.76074   6
   0  -7   0 1.60918 1.47491   2
   0  -7   0 -0.4402 1.52261   1
   0   7   0 -1.4673 1.51359   1
   0   7   0 0.36073 1.70271   1
   0   7   0 -1.6592 1.79567   4
   0   7   0 -0.3085 1.59311   2
   0   7   0 0.29684 1.80517   8
   0   7   0 -2.0444 1.75232   6
   0   7   0 -0.8440 1.66049   8
  -1  -7   0 212.905 20.0788   8
   1  -7   0 214.275 20.0484   8
   1  -7   0 212.025 20.0885   8
  -1  -7   0 235.717 20.0908   1
  -1  -7   0 218.577 20.1131   6
   1  -7   0 239.760 19.8867   5
  -1  -7   0 232.165 19.9842   2
  -1  -7   0 210.785 20.0675   8
  -1  -7   0 210.560 20.0465   1
   1  -7   0 237.529 20.0919   2
  -1  -7   0 213.839 19.7071   5
   1  -7   0 211.335 20.0452   1
   1  -7   0 221.510 20.0329   1
   1  -7   0 219.021 20.0810   6
  -1   7   0 218.016 20.4108   7
  -1   7   0 230.254 20.1195   2
   1   7   0 220.166 20.0249   2
   1   7   0 227.188 20.0455   1
  -1   7   0 217.484 20.1448   8
  -1   7   0 208.910 19.9095   5
  -1   7   0 223.141 20.0441   1
   1   7   0 211.778 20.0517   1
   1   7   0 226.089 20.1294   8
  -1   7   0 202.826 20.0799   8
   1   7   0 213.089 20.1489   4
  -1   7   0 221.513 20.0738   1
   1   7   0 234.705 20.1844   6
   1   7   0 209.049 20.0892   8
  -1   7   0 221.372 20.1318   6
  -2  -7   0 126.728 11.8131   4
   2  -7   0 123.456 11.6078   1
   2  -7   0 117.831 11.6427   8
   2  -7   0 138.227 11.7578   2
   2  -7   0 121.010 11.6892   1
  -2  -7   0 129.633 11.7800   6
  -2  -7   0 130.808 11.5727   2
   2  -7   0 131.734 11.5953   5
  -2  -7   0 119.151 11.7377   8
  -2  -7   0 114.090 11.6311   1
  -2  -7   0 130.237 11.2386   5
  -2  -7   0 121.105 11.6922   8
  -2  -7   0 130.500 11.6701   1
   2  -7   0 120.972 11.7486   8
   2  -7   0 132.206 11.7020   6
  -2   7   0 131.769 11.6978   1
  -2   7   0 132.366 11.6982   5
  -2   7   0 130.923 11.7430   6
  -2   7   0 117.403 11.7330   2
   2   7   0 115.184 11.7181   1
   2   7   0 129.138 11.8643   6
   2   7   0 119.087 11.7484   8
   2   7   0 133.096 11.7128   1
   2   7   0 114.974 11.5497   2
  -2   7   0 129.132 11.8397   8
  -2   7   0 99.8406 11.8229   7
  -2   7   0 117.018 11.7143   8
  -2   7   0 116.300 11.6644   1
   2   7   0 120.664 11.7452   8
   2   7   0 119.729 11.8330   4
   3  -7   0 1172.00 102.197   1
   3  -7   0 969.918 102.182   2
   3  -7   0 1284.39 102.656   7
   3  -7   0 1206.47 102.218   6
   3  -7   0 1188.36 102.236   8
  -3  -7   0 1183.38 102.303   6
  -3  -7   0 1156.79 102.215   1
  -3  -7   0 1224.01 102.287   8
  -3  -7   0 1177.24 102.194   1
  -3  -7   0 966.194 102.035   2
   3  -7   0 1181.80 102.277   8
  -3  -7   0 1006.34 102.275   4
   3  -7   0 1193.48 102.209   1
  -3  -7   0 1170.69 102.221   8
   3  -7   0 1003.81 102.154   5
  -3   7   0 1230.58 102.242   1
  -3   7   0 1170.49 102.234   6
  -3   7   0 1152.23 102.250   8
  -3   7   0 976.054 102.404   7
  -3   7   0 1247.57 102.281   1
  -3   7   0 1275.37 102.337   2
   3   7   0 1186.68 102.279   8
   3   7   0 994.590 102.267   6
   3   7   0 1222.35 102.387   4
   3   7   0 1273.51 102.260   1
  -3   7   0 1212.20 102.306   8
   3   7   0 1229.81 102.269   8
  -3   7   0 965.190 102.174   5
   3   7   0 1244.78 102.280   1
   3   7   0 1003.87 101.908   3
   4  -7   0 223.318 20.3266   1
   4  -7   0 248.206 20.4121   8
  -4  -7   0 263.506 20.0707   5
   4  -7   0 182.268 20.2943   5
   4  -7   0 236.902 20.4622   8
  -4  -7   0 234.738 20.4460   8
   4  -7   0 219.023 20.2972   1
   4  -7   0 188.842 20.7880   7
  -4  -7   0 233.107 20.3799   8
  -4  -7   0 184.978 20.3437   6
  -4  -7   0 203.293 20.5012   4
  -4  -7   0 194.358 20.0940   2
  -4  -7   0 220.840 20.3011   1
  -4  -7   0 234.640 20.3698   1
   4  -7   0 193.715 20.3385   2
   4   7   0 204.871 20.5260   4
  -4   7   0 222.547 20.4051   8
  -4   7   0 183.980 20.3621   2
   4   7   0 220.868 20.4160   8
  -4   7   0 244.589 20.4029   1
  -4   7   0 191.225 20.3871   5
   4   7   0 253.500 20.0519   5
   4   7   0 246.309 20.4503   8
   4   7   0 224.748 19.8885   3
   4   7   0 253.532 20.4253   1
  -4   7   0 252.103 20.5357   8
   4   7   0 233.220 20.5288   6
  -4   7   0 247.493 20.4343   1
   4   7   0 220.822 20.3663   1
  -4   7   0 201.803 20.6811   7
   5  -7   0 264.883 21.6651   1
   5  -7   0 252.065 21.6203   8
  -5  -7   0 253.390 21.3167   5
  -5  -7   0 261.575 21.6356   8
  -5  -7   0 253.528 21.6860   8
  -5  -7   0 219.994 21.4720   1
   5  -7   0 245.528 21.5509   1
  -5  -7   0 202.897 21.5191   6
   5  -7   0 209.339 21.6079   5
   5  -7   0 202.896 21.5386   2
  -5  -7   0 205.345 21.2848   2
  -5  -7   0 251.255 21.6138   1
   5  -7   0 211.617 22.0242   7
   5  -7   0 247.545 21.7144   8
  -5  -7   0 202.170 21.6333   4
  -5   7   0 265.456 21.7619   8
   5   7   0 240.672 21.7528   6
  -5   7   0 264.400 21.6305   1
  -5   7   0 213.838 21.7058   5
   5   7   0 259.472 21.6220   1
   5   7   0 237.127 21.6373   8
   5   7   0 266.423 21.6755   8
  -5   7   0 249.311 21.6435   1
  -5   7   0 210.121 21.6134   2
  -5   7   0 246.235 21.6837   8
   5   7   0 224.668 21.8421   4
  -5   7   0 221.223 21.9653   7
  -5   7   0 234.389 21.5081   6
   6  -7   0 508.297 51.3496   5
  -6  -7   0 500.487 50.7587   3
   6  -7   0 588.058 51.2723   1
  -6  -7   0 558.212 51.0681   5
  -6  -7   0 595.388 51.2243   1
  -6  -7   0 624.949 51.3770   8
   6  -7   0 567.938 51.3218   8
   6  -7   0 530.122 51.2204   2
   6  -7   0 533.105 51.6397   7
  -6  -7   0 605.343 51.2917   1
   6  -7   0 613.467 51.3212   8
  -6  -7   0 532.811 50.9872   2
  -6  -7   0 581.986 51.2569   8
  -6  -7   0 545.061 51.4778   4
  -6  -7   0 523.771 51.3109   6
   6  -7   0 623.698 51.2825   1
  -6   7   0 538.107 51.2979   2
  -6   7   0 594.801 51.6398   4
  -6   7   0 585.271 51.3198   8
   6   7   0 593.774 51.3270   8
   6   7   0 623.360 51.2915   1
   6   7   0 483.039 51.3037   6
   6   7   0 625.609 51.3260   8
   6   7   0 623.258 51.1238   5
   6   7   0 592.941 51.3101   7
  -6   7   0 554.900 51.1977   6
   6   7   0 644.158 51.2847   1
  -6   7   0 515.123 51.4111   5
  -6   7   0 494.241 51.4808   7
  -6   7   0 574.282 51.3329   1
  -6   7   0 598.545 51.3706   8
   6   7   0 528.190 51.4980   4
  -6   7   0 666.917 51.3786   1
   7  -7   0 529.970 43.2223   1
  -7  -7   0 456.582 43.4069   4
   7  -7   0 490.814 43.1227   1
   7  -7   0 425.506 43.4790   7
  -7  -7   0 459.500 42.9618   5
  -7  -7   0 495.050 43.1659   1
   7  -7   0 534.876 43.3337   8
  -7  -7   0 524.233 43.2484   8
  -7  -7   0 520.255 43.1708   8
   7  -7   0 442.834 43.0981   2
  -7  -7   0 501.846 43.0877   1
  -7  -7   0 465.387 42.6382   3
  -7  -7   0 460.000 43.2324   6
  -7  -7   0 437.231 42.7945   2
   7  -7   0 447.739 43.2780   5
   7  -7   0 500.393 43.1866   8
   7   7   0 486.714 43.0121   5
   7   7   0 413.533 43.1411   6
   7   7   0 515.468 43.2208   8
   7   7   0 502.824 43.1917   7
  -7   7   0 472.576 43.2028   8
   7   7   0 450.439 43.4223   4
  -7   7   0 455.150 43.5058   4
  -7   7   0 434.751 43.4438   7
  -7   7   0 481.551 43.2024   1
   7   7   0 528.076 43.1403   1
  -7   7   0 462.868 43.1534   8
  -7   7   0 461.377 43.0576   6
   7   7   0 514.926 43.1657   1
  -7   7   0 523.121 43.1758   1
  -7   7   0 435.782 43.1450   2
  -7   7   0 427.945 43.2557   5
   7   7   0 552.844 43.2567   8
   8  -7   0 98.4849 12.1174   7
   8  -7   0 113.780 11.5136   2
  -8  -7   0 120.685 10.8778   3
  -8  -7   0 121.688 11.6654   8
   8  -7   0 120.749 11.7620   8
   8  -7   0 115.984 11.5330   8
  -8  -7   0 117.057 11.5510   1
  -8  -7   0 116.890 11.4118   5
  -8  -7   0 117.319 11.7480   4
   8  -7   0 117.780 11.4703   1
  -8  -7   0 105.927 11.6099   6
   8  -7   0 133.194 11.7534   1
  -8  -7   0 106.880 11.0686   2
  -8  -7   0 125.598 11.4713   8
  -8  -7   0 117.576 11.5421   1
   8  -7   0 124.244 11.9133   5
  -8   7   0 99.8401 11.9951   7
   8   7   0 109.940 12.0328   4
   8   7   0 129.144 11.5319   1
   8   7   0 121.678 11.3684   5
  -8   7   0 121.627 11.6490   2
   8   7   0 135.806 11.8834   7
  -8   7   0 110.657 12.0927   4
  -8   7   0 131.712 11.6575   1
  -8   7   0 120.496 11.6775   8
  -8   7   0 125.461 11.7076   8
  -8   7   0 106.323 11.5593   1
   8   7   0 107.315 11.7401   6
   8   7   0 121.982 11.7096   8
   8   7   0 136.371 11.6956   8
  -8   7   0 114.818 11.9805   5
   8   7   0 127.046 11.6204   1
  -9  -7   0 208.013 18.8596   6
   9  -7   0 181.541 18.5878   2
  -9  -7   0 188.929 18.5710   5
   9  -7   0 170.742 19.0970   7
   9  -7   0 208.717 18.7717   1
  -9  -7   0 195.062 18.1005   3
  -9  -7   0 222.143 18.7810   8
   9  -7   0 210.210 18.9254   8
  -9  -7   0 185.831 18.6318   8
  -9  -7   0 217.062 18.7442   1
   9  -7   0 200.125 18.6888   8
  -9   7   0 191.317 18.7141   2
  -9   7   0 183.876 18.7023   8
   9   7   0 199.723 18.6815   1
   9   7   0 184.836 18.8260   6
  -9   7   0 219.094 18.7536   1
  -9   7   0 187.195 18.7108   1
  -9   7   0 197.600 18.8124   8
   9   7   0 205.798 18.5979   5
   9   7   0 222.571 18.9354   7
   9   7   0 224.567 18.7012   1
   9   7   0 198.904 18.7224   8
   9   7   0 215.961 18.8936   8
   9   7   0 182.270 19.1586   4
  -9   7   0 199.190 19.1349   5
  10  -7   0 151.026 17.0710   7
  10  -7   0 174.317 16.6895   1
  10  -7   0 174.537 16.8507   8
 -10  -7   0 181.767 16.0663   3
 -10  -7   0 179.712 16.6530   5
 -10  -7   0 190.227 16.6831   8
 -10  -7   0 184.206 16.6467   8
  10  -7   0 169.109 16.6025   8
 -10  -7   0 166.050 16.4899   1
  10   7   0 173.134 17.2132   4
 -10   7   0 154.513 16.6019   8
  10   7   0 181.474 16.5709   5
 -10   7   0 169.853 16.7197   8
 -10   7   0 151.735 16.6016   1
  10   7   0 190.804 16.8521   7
  10   7   0 184.559 16.7975   8
 -10   7   0 171.697 16.6370   2
 -10   7   0 168.017 16.5425   1
  10   7   0 202.396 16.8365   8
  10   7   0 181.597 16.6963   1
 -10   7   0 185.954 16.9861   5
  10   7   0 165.361 16.7447   6
  11  -7   0 14.9397 3.20643   1
 -11  -7   0 13.9890 2.01574   2
 -11  -7   0 13.8751 2.43379   3
 -11  -7   0 20.7320 3.33319   5
  11  -7   0 7.65371 3.29285   8
  11  -7   0 14.7141 3.91224   7
 -11  -7   0 12.7431 3.06233   8
 -11  -7   0 11.2640 3.15258   8
 -11  -7   0 14.3465 2.93846   1
  11  -7   0 12.6132 3.06668   8
  11   7   0 16.2590 3.49157   8
 -11   7   0 10.8678 3.94922   5
  11   7   0 11.6331 3.24329   6
 -11   7   0 11.6409 2.74760   8
  11   7   0 13.3847 3.25416   1
  11   7   0 17.6393 3.53320   7
  11   7   0 11.8558 3.52375   4
 -11   7   0 9.02578 3.16978   8
 -11   7   0 15.5083 3.29877   2
 -11   7   0 13.9067 3.19287   1
  11   7   0 15.1701 3.33809   8
  11   7   0 21.0605 3.79929   5
 -12  -7   0 33.2062 5.41233   5
 -12  -7   0 29.8928 4.59782   1
 -12  -7   0 38.4211 4.14607   2
  12  -7   0 33.2564 5.62537   7
 -12  -7   0 33.0160 4.41547   3
 -12  -7   0 32.3057 4.74238   8
  12  -7   0 38.2335 5.39503   8
  12  -7   0 32.7710 4.87844   1
 -12   7   0 35.0088 4.90691   8
  12   7   0 27.5227 4.84954   8
 -12   7   0 44.6919 5.62851   8
  12   7   0 44.4736 5.62612   7
 -12   7   0 25.3973 4.65769   1
  12   7   0 31.5759 4.87572   8
  12   7   0 25.9374 4.69614   1
 -12   7   0 35.2903 5.66325   5
  12   7   0 37.0367 5.95178   4
 -12   7   0 51.5621 5.48094   2
  12   7   0 28.5467 4.94046   6
  13  -7   0 12.5363 3.98609   7
 -13  -7   0 4.32477 2.21230   3
 -13  -7   0 7.78494 2.92709   8
  13  -7   0 4.47398 2.96879   1
 -13  -7   0 7.53353 3.28228   5
  13  -7   0 10.2097 3.47103   8
 -13  -7   0 3.94899 2.57369   1
 -13  -7   0 5.70040 1.72911   2
  13   7   0 8.83745 4.24435   4
  13   7   0 9.94469 3.53346   7
  13   7   0 5.04662 3.05594   1
 -13   7   0 8.45460 2.96026   8
  13   7   0 5.62383 3.24398   8
 -13   7   0 7.00475 3.04974   2
 -13   7   0 6.84225 2.88745   1
 -13   7   0 8.27959 3.33653   8
  13   7   0 1.92968 3.43874   6
  13   7   0 2.64651 2.94129   8
 -13   7   0 6.77998 3.27187   5
  14  -7   0 1.21387 2.91302   1
 -14  -7   0 -0.1835 2.68660   8
 -14  -7   0 0.88508 2.39121   1
 -14  -7   0 0.76467 2.20186   3
 -14  -7   0 -1.1684 2.61448   5
  14  -7   0 1.07090 3.38756   8
 -14  -7   0 -0.7708 1.50046   2
  14  -7   0 2.38688 3.82227   7
  14   7   0 -3.9788 2.60769   1
  14   7   0 0.52750 4.06606   4
  14   7   0 0.29263 3.13228   8
 -14   7   0 -0.3797 2.80883   2
 -14   7   0 -0.2353 2.74974   1
 -14   7   0 -1.1918 3.66822   5
  14   7   0 -0.8522 3.21950   8
  14   7   0 2.61035 3.18041   7
 -14   7   0 -3.5324 2.72747   8
 -14   7   0 -1.4697 2.93457   8
 -15  -7   0 7.35984 3.24998   8
  15  -7   0 13.6238 4.18135   8
  15  -7   0 3.26684 4.10718   7
 -15  -7   0 13.3797 3.26445   1
 -15  -7   0 11.5493 3.57440   5
  15  -7   0 9.19320 3.50607   1
 -15  -7   0 12.6656 2.23611   2
 -15   7   0 15.3527 3.72005   1
  15   7   0 10.3889 3.63907   1
  15   7   0 13.7368 3.95009   8
 -15   7   0 10.7521 3.51557   2
 -15   7   0 9.36088 4.68772   5
 -15   7   0 12.9549 3.61036   8
  15   7   0 11.6624 3.83475   8
  15   7   0 11.3683 4.01060   4
 -15   7   0 6.98978 3.62846   8
  15   7   0 12.0032 3.75927   7
 -16  -7   0 46.3039 5.11162   2
  16  -7   0 42.5135 7.03647   7
  16  -7   0 26.6286 6.06012   8
 -16  -7   0 38.3703 5.66176   8
  16  -7   0 38.7540 5.92611   1
 -16  -7   0 46.7125 6.53565   5
 -16  -7   0 33.8821 5.48977   1
  16   7   0 33.3461 5.99146   8
 -16   7   0 45.5479 6.20613   2
  16   7   0 29.3839 5.57095   1
  16   7   0 45.6199 7.43087   4
  16   7   0 42.4800 6.76109   7
 -16   7   0 42.2907 6.08207   8
 -16   7   0 55.8259 8.23357   5
 -16   7   0 31.5997 5.72971   1
 -17  -7   0 12.9640 3.70472   1
  17  -7   0 9.27875 4.70471   7
 -17  -7   0 16.9343 4.39736   5
  17  -7   0 18.1014 4.40013   1
 -17   7   0 10.9560 3.90984   1
 -17   7   0 9.96879 3.87518   8
  17   7   0 19.9397 4.94369   4
  17   7   0 10.9713 4.37036   8
 -17   7   0 12.1946 3.84150   2
 -17   7   0 15.6657 5.54637   5
  17   7   0 16.8248 4.78716   7
  17   7   0 10.8603 3.85212   1
 -18  -7   0 5.95739 3.23429   1
 -18  -7   0 -1.9778 3.26727   5
  18  -7   0 6.26719 3.70106   1
  18  -7   0 -3.7621 4.05833   7
 -18   7   0 2.70588 3.73767   5
  18   7   0 -0.0073 3.26711   1
  18   7   0 -1.2385 4.81233   4
 -18   7   0 5.43076 3.49849   8
  18   7   0 0.61420 3.94305   7
 -18   7   0 0.17539 3.31438   2
 -18   7   0 4.18126 3.45673   1
  18   7   0 1.80100 3.75921   8
 -19  -7   0 19.3454 5.15257   5
  19  -7   0 15.7766 5.48808   7
  19  -7   0 19.8969 4.83410   1
 -19  -7   0 17.7972 4.26820   1
  19   7   0 27.8130 5.41592   7
  19   7   0 24.8111 5.01675   1
 -19   7   0 24.6175 4.84395   2
  19   7   0 12.8083 5.99109   4
 -19   7   0 15.2913 4.66835   1
 -19   7   0 19.9732 6.31682   5
  19   7   0 18.0382 5.05811   8
 -20  -7   0 12.5900 4.24351   1
  20  -7   0 12.0353 4.85069   1
  20  -7   0 20.5864 5.76432   7
 -20  -7   0 14.8143 4.97002   5
  20   7   0 15.3775 5.30175   4
 -20   7   0 16.6393 4.47559   1
 -20   7   0 25.8910 6.99628   5
  20   7   0 12.4863 4.36579   1
 -20   7   0 11.9346 4.23164   2
  20   7   0 19.2067 4.86950   7
   0  -8   0 362.722 33.0057   6
   0  -8   0 393.666 32.6984   5
   0  -8   0 396.779 32.9599   2
   0  -8   0 349.470 32.9321   1
   0  -8   0 325.930 32.8762   1
   0  -8   0 349.636 32.9617   8
   0  -8   0 343.656 32.9862   8
   0   8   0 385.708 33.0871   6
   0   8   0 373.735 32.9532   1
   0   8   0 353.604 33.0353   4
   0   8   0 379.859 33.0459   8
   0   8   0 348.388 32.9905   8
   0   8   0 362.191 32.9756   1
   0   8   0 383.994 32.9937   2
   1  -8   0 264.932 23.5610   2
  -1  -8   0 248.123 23.6029   8
  -1  -8   0 256.656 23.2196   5
   1  -8   0 260.532 23.6486   8
  -1  -8   0 243.654 23.5617   1
   1  -8   0 271.267 23.3924   5
   1  -8   0 272.548 23.5962   6
  -1  -8   0 246.654 23.6113   8
  -1  -8   0 261.022 23.5056   2
   1  -8   0 250.800 23.5721   1
  -1  -8   0 242.766 23.5752   1
  -1  -8   0 248.847 23.5950   6
   1  -8   0 249.256 23.5889   8
   1  -8   0 250.932 23.5461   1
  -1   8   0 265.253 23.6187   1
   1   8   0 250.511 23.6549   8
  -1   8   0 270.841 23.7296   8
  -1   8   0 264.585 23.9838   7
   1   8   0 274.720 23.6967   8
   1   8   0 251.844 23.6205   1
   1   8   0 262.211 23.7132   6
   1   8   0 262.020 23.5864   1
   1   8   0 257.412 23.7119   4
   1   8   0 268.141 23.5912   2
  -1   8   0 258.272 23.6342   1
  -1   8   0 257.629 23.4373   5
  -1   8   0 280.215 23.6926   2
  -1   8   0 259.668 23.6718   8
  -1   8   0 267.827 23.6885   6
  -2  -8   0 383.450 32.3447   2
  -2  -8   0 371.763 32.5354   6
   2  -8   0 384.399 32.4908   2
  -2  -8   0 334.131 32.3798   1
  -2  -8   0 359.835 32.4518   8
   2  -8   0 346.398 32.3912   1
   2  -8   0 346.312 32.4147   8
   2  -8   0 372.014 32.4778   6
   2  -8   0 392.226 32.3614   5
  -2  -8   0 322.255 32.4979   4
   2  -8   0 344.483 32.3927   1
  -2  -8   0 357.100 32.4331   1
   2  -8   0 378.619 32.5301   8
  -2  -8   0 339.718 32.4409   8
   2   8   0 377.948 32.6069   6
  -2   8   0 383.649 32.4255   5
   2   8   0 313.484 32.3205   2
  -2   8   0 369.074 32.5529   8
  -2   8   0 356.150 32.4818   1
   2   8   0 359.811 32.5784   4
   2   8   0 351.780 32.4620   1
  -2   8   0 345.903 32.4688   8
  -2   8   0 380.467 32.5193   6
  -2   8   0 384.390 32.4883   1
   2   8   0 373.869 32.4537   1
  -2   8   0 288.107 32.6453   7
   2   8   0 367.447 32.5110   8
   2   8   0 354.281 32.4764   8
  -2   8   0 381.171 32.5347   2
  -3  -8   0 139.221 11.8593   2
   3  -8   0 127.000 11.9804   6
   3  -8   0 123.059 11.9711   1
  -3  -8   0 128.706 12.0197   1
   3  -8   0 117.239 11.8722   5
   3  -8   0 121.884 11.9432   1
  -3  -8   0 129.736 12.1257   6
  -3  -8   0 130.739 12.2176   4
  -3  -8   0 149.328 11.5496   5
  -3  -8   0 122.408 12.0568   8
   3  -8   0 142.529 12.9172   7
   3  -8   0 121.606 12.0846   8
   3  -8   0 131.631 12.0248   8
   3  -8   0 123.063 12.0455   2
  -3  -8   0 117.794 11.9307   1
  -3  -8   0 124.093 12.0342   8
  -3   8   0 103.999 12.2785   7
   3   8   0 134.118 12.1203   1
   3   8   0 110.176 12.1441   6
  -3   8   0 130.263 12.0474   6
   3   8   0 133.565 12.1353   8
  -3   8   0 127.382 12.1195   8
   3   8   0 145.355 12.1292   1
  -3   8   0 137.565 12.0553   5
  -3   8   0 112.860 11.9618   2
  -3   8   0 134.293 12.1364   1
   3   8   0 139.475 12.2962   4
   3   8   0 122.871 12.1077   8
  -3   8   0 127.006 12.1607   8
  -3   8   0 130.270 12.0469   1
   3   8   0 107.848 11.5503   3
   3   8   0 112.959 11.8100   2
   4  -8   0 21.2631 4.41790   7
   4  -8   0 30.0984 3.93963   1
  -4  -8   0 22.0733 3.47318   8
  -4  -8   0 25.2944 3.85208   4
   4  -8   0 21.9574 3.61870   6
  -4  -8   0 24.8060 3.87937   6
  -4  -8   0 30.3999 3.82466   1
   4  -8   0 21.1718 3.46657   8
   4  -8   0 31.0997 3.91654   8
   4  -8   0 24.4587 3.36119   1
  -4  -8   0 24.1890 3.43475   2
  -4  -8   0 30.3856 4.07857   1
  -4  -8   0 30.2818 3.08806   5
  -4  -8   0 29.0176 4.00351   8
   4  -8   0 21.7596 3.71974   5
   4  -8   0 21.3812 3.43223   2
   4   8   0 27.1794 3.62953   2
   4   8   0 30.2918 4.15761   8
  -4   8   0 26.7994 3.76735   6
  -4   8   0 24.5700 3.98900   5
   4   8   0 25.3859 2.86706   3
   4   8   0 29.4956 3.88851   1
  -4   8   0 33.0495 4.31531   8
   4   8   0 27.1008 4.08450   8
   4   8   0 19.3724 3.57590   6
  -4   8   0 22.4182 3.55138   2
   4   8   0 29.8052 4.38338   4
  -4   8   0 17.8167 3.37256   1
  -4   8   0 28.1832 4.12454   1
  -4   8   0 18.1303 3.39686   8
  -4   8   0 34.2307 4.81823   7
   4   8   0 34.1239 4.20927   1
  -5  -8   0 18.5665 3.51392   4
  -5  -8   0 20.8746 3.09761   8
   5  -8   0 15.9964 3.04633   2
  -5  -8   0 25.1700 2.89457   5
  -5  -8   0 19.9876 3.15832   8
   5  -8   0 20.6236 3.75153   7
   5  -8   0 19.2684 2.99866   8
   5  -8   0 16.8304 2.90145   1
   5  -8   0 19.8293 3.23278   5
  -5  -8   0 19.1505 3.02784   1
  -5  -8   0 18.7184 3.17912   6
  -5  -8   0 20.4883 3.15938   1
   5  -8   0 15.5217 2.99194   1
   5  -8   0 17.2103 3.09635   8
  -5  -8   0 17.5220 2.56055   2
  -5   8   0 18.0463 3.40116   5
  -5   8   0 15.2834 2.86497   6
   5   8   0 21.7659 3.27440   8
   5   8   0 17.6718 3.54424   4
   5   8   0 28.6513 3.66788   1
   5   8   0 24.0655 3.41788   6
   5   8   0 22.0799 3.23694   8
  -5   8   0 21.1194 4.03453   7
  -5   8   0 17.4113 3.32709   8
  -5   8   0 15.0681 3.14687   1
   5   8   0 20.3136 3.04697   1
   5   8   0 23.4945 2.93807   5
  -5   8   0 18.4416 2.91968   8
  -5   8   0 17.1100 3.13024   2
  -5   8   0 15.5865 2.97408   1
  -6  -8   0 28.2163 4.60956   6
  -6  -8   0 36.0341 4.53653   1
   6  -8   0 31.3246 4.55574   2
   6  -8   0 35.8356 4.60627   8
   6  -8   0 36.1218 4.51878   1
  -6  -8   0 32.2476 5.07009   4
   6  -8   0 35.8947 4.65490   1
  -6  -8   0 33.2662 4.80290   8
  -6  -8   0 30.6595 3.97441   2
   6  -8   0 40.7316 4.99514   8
  -6  -8   0 27.6383 3.97898   5
  -6  -8   0 36.0162 4.46720   1
   6  -8   0 32.9057 4.68957   5
  -6  -8   0 33.6761 4.63204   8
   6  -8   0 26.6114 5.05073   7
   6   8   0 37.5823 4.76876   7
   6   8   0 42.0806 4.86629   8
   6   8   0 36.1997 4.75992   8
  -6   8   0 33.6876 5.38606   4
  -6   8   0 31.4651 4.27763   6
  -6   8   0 24.9709 4.16545   2
  -6   8   0 38.6128 4.84530   8
   6   8   0 44.0647 4.15867   5
  -6   8   0 32.0577 4.74906   1
  -6   8   0 31.2033 4.98547   5
  -6   8   0 40.5737 5.49118   7
   6   8   0 29.2392 4.56124   1
  -6   8   0 33.2506 4.41830   8
   6   8   0 29.2236 4.71036   4
   6   8   0 30.1356 4.86126   6
  -6   8   0 29.7498 4.61956   1
   6   8   0 35.5772 4.55819   1
  -7  -8   0 11.8121 2.87528   8
  -7  -8   0 14.3934 2.75660   8
  -7  -8   0 14.4589 2.71559   1
   7  -8   0 7.97559 2.74450   1
  -7  -8   0 12.3212 2.05415   2
   7  -8   0 15.4990 3.03531   8
   7  -8   0 13.1080 3.80611   7
  -7  -8   0 11.1280 2.41740   5
   7  -8   0 13.4244 2.73329   8
   7  -8   0 12.2946 2.62922   2
  -7  -8   0 15.7107 3.08763   4
  -7  -8   0 16.4415 2.81695   1
  -7  -8   0 13.0454 1.70377   3
   7  -8   0 15.8870 2.72656   1
  -7  -8   0 14.6909 2.88997   6
   7  -8   0 16.6452 3.25129   5
   7   8   0 15.4281 3.15586   6
  -7   8   0 10.7569 2.96926   8
   7   8   0 11.1093 3.09720   7
  -7   8   0 7.73238 3.17005   5
   7   8   0 14.5390 3.57937   4
  -7   8   0 14.1754 3.14249   4
  -7   8   0 11.8041 2.80293   1
  -7   8   0 11.3838 2.78060   1
   7   8   0 13.5310 2.95539   1
  -7   8   0 11.0937 2.78913   8
  -7   8   0 16.8371 3.73762   7
   7   8   0 12.3351 2.60125   8
  -7   8   0 8.67555 2.75590   2
   7   8   0 15.1218 2.79315   1
  -7   8   0 11.4441 2.45627   6
   7   8   0 15.8464 2.94538   8
   7   8   0 13.4095 2.54798   5
   8  -8   0 206.123 21.2825   7
  -8  -8   0 250.510 20.9287   8
   8  -8   0 205.255 20.6722   2
  -8  -8   0 205.059 20.2715   2
   8  -8   0 223.725 20.7292   8
  -8  -8   0 205.904 20.0181   3
  -8  -8   0 194.502 20.4277   5
  -8  -8   0 238.032 20.6836   1
  -8  -8   0 236.328 20.7477   8
   8  -8   0 244.993 20.8114   1
   8  -8   0 230.259 20.8736   8
  -8  -8   0 210.892 20.7828   6
   8   8   0 253.473 20.9462   7
  -8   8   0 218.991 20.7698   1
  -8   8   0 219.630 20.8008   8
   8   8   0 251.505 20.7793   1
   8   8   0 250.108 20.8547   8
   8   8   0 234.710 20.9921   6
   8   8   0 258.708 20.6111   5
   8   8   0 222.286 20.6970   1
  -8   8   0 212.556 20.5435   6
  -8   8   0 216.383 20.9212   5
   8   8   0 258.233 20.9800   8
   8   8   0 212.140 21.1303   4
  -8   8   0 196.219 20.6847   8
  -8   8   0 206.805 21.1644   4
  -8   8   0 199.209 20.7321   2
   9  -8   0 -0.4427 2.52359   8
  -9  -8   0 -0.6296 2.16731   8
  -9  -8   0 -0.8017 1.20057   3
  -9  -8   0 -0.0790 1.40337   2
  -9  -8   0 -2.2771 2.07033   8
  -9  -8   0 -0.6447 2.17770   1
   9  -8   0 0.05716 2.40901   1
   9  -8   0 -0.2933 3.16846   7
   9  -8   0 0.35085 2.15968   8
  -9  -8   0 -0.0917 1.98075   5
   9   8   0 1.61026 2.37245   5
   9   8   0 -3.6094 2.17395   8
  -9   8   0 5.40534 2.49947   1
  -9   8   0 0.44269 2.42080   8
   9   8   0 1.21380 2.29532   1
   9   8   0 2.62309 3.20231   4
  -9   8   0 2.40201 2.32722   2
   9   8   0 -1.0273 2.58434   6
  -9   8   0 2.26600 2.31826   1
   9   8   0 1.66842 2.89618   7
  -9   8   0 1.98004 2.01299   6
   9   8   0 1.23928 2.54564   8
   9   8   0 -2.2109 2.37552   1
  -9   8   0 -1.7286 2.81412   5
  -9   8   0 -1.7145 2.25123   8
  10  -8   0 0.47682 2.20299   8
  10  -8   0 2.83433 2.46277   1
 -10  -8   0 0.28412 2.22724   5
 -10  -8   0 5.51224 1.67732   2
  10  -8   0 1.15826 2.62727   8
 -10  -8   0 0.14861 2.37777   8
  10  -8   0 1.31822 3.47017   7
 -10  -8   0 6.89140 2.56927   8
 -10  -8   0 3.04649 1.47737   3
 -10  -8   0 2.64386 2.31982   1
  10   8   0 2.28934 2.49366   1
  10   8   0 3.80973 2.58107   8
  10   8   0 0.80608 2.56434   7
 -10   8   0 5.40591 2.62113   8
  10   8   0 4.78826 2.39511   5
  10   8   0 2.93018 2.83519   6
 -10   8   0 1.06862 2.42181   1
  10   8   0 1.33563 2.63780   8
  10   8   0 7.75017 2.61034   1
  10   8   0 3.48160 3.42165   4
 -10   8   0 5.65556 2.75933   5
 -10   8   0 9.07045 2.86438   8
 -10   8   0 4.55375 2.46170   1
 -10   8   0 2.19169 1.87421   6
 -10   8   0 3.09678 2.44236   2
  11  -8   0 7.99425 3.88932   7
  11  -8   0 4.99103 2.86703   1
 -11  -8   0 6.82680 1.89647   3
  11  -8   0 6.23533 2.68799   8
 -11  -8   0 3.02327 2.51710   8
 -11  -8   0 5.57638 1.84677   2
  11  -8   0 4.87582 3.09065   8
 -11  -8   0 9.60647 2.59490   5
 -11  -8   0 8.03453 2.60573   1
  11   8   0 9.14935 3.75744   4
  11   8   0 2.19136 2.77224   8
 -11   8   0 9.26940 2.90640   8
  11   8   0 11.0192 3.05805   8
 -11   8   0 6.95689 2.66555   2
 -11   8   0 5.65060 2.88992   8
 -11   8   0 10.7903 3.00833   1
 -11   8   0 9.11508 3.63394   5
  11   8   0 8.08283 3.13180   6
  11   8   0 6.86594 2.84668   5
  11   8   0 6.46145 2.79033   1
  11   8   0 7.38886 3.27509   7
 -12  -8   0 226.346 19.5134   5
 -12  -8   0 202.505 18.6594   2
  12  -8   0 205.453 19.5418   1
 -12  -8   0 210.919 19.5247   8
 -12  -8   0 209.325 19.3857   1
  12  -8   0 223.352 19.8219   8
 -12  -8   0 199.612 18.7202   3
 -12  -8   0 226.755 18.8973   2
  12  -8   0 197.019 20.3035   7
 -12   8   0 191.930 19.5011   1
 -12   8   0 217.730 20.2279   5
 -12   8   0 204.512 19.6018   8
 -12   8   0 169.021 19.3687   8
  12   8   0 180.269 19.5189   6
  12   8   0 209.379 19.5639   8
 -12   8   0 228.599 19.6110   2
  12   8   0 186.682 19.4522   1
  12   8   0 192.113 19.4088   7
  12   8   0 199.424 20.1559   4
  12   8   0 222.291 19.6598   8
  13  -8   0 15.4595 4.37312   7
 -13  -8   0 10.2808 1.99939   2
  13  -8   0 6.79940 3.66095   8
 -13  -8   0 7.28564 3.28250   5
 -13  -8   0 9.33248 2.99175   1
  13  -8   0 11.9425 3.40764   1
 -13  -8   0 12.2042 2.34230   3
 -13  -8   0 8.72841 3.01884   8
 -13   8   0 6.08555 3.14507   8
 -13   8   0 10.0870 3.26891   1
  13   8   0 9.62517 3.44456   8
  13   8   0 7.19561 3.21595   1
  13   8   0 5.84130 3.43031   6
 -13   8   0 14.6417 4.51591   5
  13   8   0 10.0319 4.38208   4
 -13   8   0 5.38033 3.34512   8
 -13   8   0 12.0366 3.15056   2
  13   8   0 10.8778 3.89742   7
  13   8   0 14.2423 3.74335   8
 -14  -8   0 231.813 20.2967   5
  14  -8   0 223.960 20.7339   8
 -14  -8   0 194.961 20.1856   8
  14  -8   0 206.399 20.4546   1
 -14  -8   0 216.721 19.4037   2
 -14  -8   0 208.200 20.1315   1
  14  -8   0 207.703 20.9140   7
 -14   8   0 254.101 21.3849   5
  14   8   0 216.667 20.5139   6
 -14   8   0 215.060 20.4953   1
 -14   8   0 189.716 20.2948   8
  14   8   0 206.834 20.3150   1
 -14   8   0 199.449 20.3844   8
 -14   8   0 235.586 20.5366   2
  14   8   0 215.106 20.4874   8
  14   8   0 193.670 20.7019   4
  14   8   0 190.010 20.3022   8
  14   8   0 211.605 20.4998   7
  15  -8   0 4.70765 4.22480   7
 -15  -8   0 -3.7828 2.41698   8
 -15  -8   0 -1.4009 2.59171   1
  15  -8   0 3.32191 3.16695   1
 -15  -8   0 2.97477 2.95268   5
 -15  -8   0 1.90182 1.67070   2
  15  -8   0 -0.8490 3.26430   8
  15   8   0 2.25076 3.71799   7
 -15   8   0 -2.8998 2.99256   2
  15   8   0 0.15821 4.25141   4
  15   8   0 -1.3566 3.30439   8
 -15   8   0 8.55162 3.66476   5
  15   8   0 1.77673 3.03350   1
 -15   8   0 2.42493 3.09233   8
 -15   8   0 0.07268 2.82424   1
 -16  -8   0 62.0645 8.29818   1
  16  -8   0 73.0083 9.21780   8
 -16  -8   0 59.3895 8.38829   8
  16  -8   0 60.2358 9.99659   7
 -16  -8   0 72.1429 8.48490   5
  16  -8   0 67.6201 8.77787   1
  16   8   0 64.1025 9.11127   7
  16   8   0 76.5177 10.0642   4
 -16   8   0 73.6701 8.86568   1
 -16   8   0 89.1310 9.14707   2
  16   8   0 68.5611 8.92817   8
 -16   8   0 67.2940 8.81306   8
  16   8   0 62.9552 8.54881   1
 -16   8   0 72.2294 9.05022   5
 -17  -8   0 7.00360 3.59124   5
  17  -8   0 10.2767 3.75305   1
 -17  -8   0 4.92945 3.03992   1
  17  -8   0 6.35223 4.46487   7
 -17   8   0 7.42385 3.22759   2
 -17   8   0 6.39637 3.52069   1
  17   8   0 1.42031 3.40996   1
  17   8   0 3.47764 3.83584   4
  17   8   0 -1.1988 3.32733   8
 -17   8   0 5.19803 3.86483   5
  17   8   0 2.28543 4.25485   7
 -17   8   0 3.48911 3.52676   8
  18  -8   0 16.3204 4.51374   1
 -18  -8   0 17.2472 4.16958   1
  18  -8   0 20.6568 5.96357   7
 -18  -8   0 26.5349 5.05294   5
 -18   8   0 22.9322 4.66822   2
 -18   8   0 25.2662 6.35737   5
  18   8   0 13.0552 4.86564   7
 -18   8   0 18.1399 4.54454   1
  18   8   0 14.5478 5.24925   8
  18   8   0 16.2709 5.99317   4
  18   8   0 14.3831 4.40690   1
 -18   8   0 17.4105 4.45010   8
 -19  -8   0 12.3990 4.41017   5
 -19  -8   0 8.35419 3.62473   1
  19  -8   0 3.23850 5.37481   7
  19  -8   0 10.5997 4.23712   1
  19   8   0 10.6474 4.30340   7
  19   8   0 -0.0553 3.72074   1
  19   8   0 4.19603 4.56229   8
 -19   8   0 6.14481 5.16236   5
  19   8   0 5.24804 4.18358   4
 -19   8   0 6.26836 3.81302   1
 -19   8   0 12.7684 3.84002   2
  20  -8   0 22.2068 5.30916   1
  20  -8   0 9.76077 5.53133   7
 -20  -8   0 18.1717 4.60836   1
  20   8   0 33.3412 6.85340   4
  20   8   0 18.8424 5.01466   1
 -20   8   0 27.8885 5.13811   2
 -20   8   0 32.0294 7.39674   5
 -20   8   0 26.4645 5.38525   1
  20   8   0 17.9688 5.16906   7
   0  -9   0 -2.3869 1.71630   1
   0  -9   0 1.64486 1.72739   1
   0  -9   0 -0.0804 1.61312   2
   0  -9   0 -1.9594 1.67414   8
   0  -9   0 -1.0217 1.91417   8
   0  -9   0 -2.0377 1.80163   6
   0  -9   0 0.75443 1.21656   5
   0   9   0 -1.0468 1.89177   8
   0   9   0 -2.6450 1.97312   4
   0   9   0 -0.2779 1.76558   1
   0   9   0 -1.6826 1.97748   1
   0   9   0 -0.4854 1.87725   8
   0   9   0 0.13427 2.11270   6
   0   9   0 0.02060 1.79420   2
   1  -9   0 1887.20 166.443   6
  -1  -9   0 1804.22 166.370   1
   1  -9   0 1884.18 166.451   8
   1  -9   0 1762.82 166.380   8
  -1  -9   0 1923.78 166.342   2
   1  -9   0 2051.70 166.233   5
   1  -9   0 1798.74 166.360   1
  -1  -9   0 1808.26 166.410   8
   1  -9   0 1821.88 166.372   1
  -1  -9   0 1857.53 166.425   8
  -1  -9   0 1805.75 166.374   1
   1  -9   0 2020.72 166.438   2
  -1  -9   0 1927.43 166.076   5
  -1  -9   0 1842.90 166.463   6
   1   9   0 1832.29 166.498   4
  -1   9   0 1999.98 166.467   2
   1   9   0 1764.20 166.422   8
   1   9   0 1971.25 166.414   2
  -1   9   0 1847.79 166.452   6
   1   9   0 1943.78 166.484   8
  -1   9   0 1884.85 166.719   7
  -1   9   0 1902.23 166.508   8
  -1   9   0 1761.16 166.421   8
   1   9   0 1788.46 166.448   6
  -1   9   0 1936.21 166.419   1
   1   9   0 1984.30 166.453   1
  -1   9   0 1787.03 166.399   1
   1   9   0 1752.29 166.382   1
  -2  -9   0 28.1706 3.91927   1
   2  -9   0 34.8487 3.60461   5
  -2  -9   0 30.6149 4.07581   8
  -2  -9   0 26.0336 3.56173   8
  -2  -9   0 31.6685 4.11094   4
   2  -9   0 26.5726 3.49921   6
  -2  -9   0 28.0373 3.76696   2
  -2  -9   0 28.0215 4.04006   6
   2  -9   0 16.2769 3.43253   8
   2  -9   0 26.1711 3.91347   2
   2  -9   0 22.2315 3.38792   8
  -2  -9   0 31.0736 3.89499   1
   2  -9   0 24.4429 3.79255   1
   2  -9   0 28.1447 4.11634   1
  -2   9   0 19.9603 3.51547   8
  -2   9   0 23.0497 3.49832   8
   2   9   0 25.6722 3.70548   8
  -2   9   0 29.9597 4.18562   2
  -2   9   0 31.2089 4.15182   6
   2   9   0 24.7261 3.58304   8
   2   9   0 30.1908 3.83402   2
   2   9   0 24.8633 3.85539   4
   2   9   0 26.4490 3.82107   6
  -2   9   0 21.1134 3.40936   1
  -2   9   0 31.2615 3.64067   5
   2   9   0 26.6450 3.90118   1
   2   9   0 27.5945 3.99493   1
  -2   9   0 24.6516 3.84898   1
  -2   9   0 24.1749 4.20869   7
   3  -9   0 323.011 30.1369   8
   3  -9   0 326.889 30.1055   1
  -3  -9   0 329.198 30.2015   8
   3  -9   0 273.834 30.5245   7
  -3  -9   0 343.867 30.2668   6
  -3  -9   0 339.802 30.1038   1
   3  -9   0 339.847 30.2322   8
   3  -9   0 325.312 30.1228   6
  -3  -9   0 348.194 30.0052   2
   3  -9   0 322.068 30.1085   1
  -3  -9   0 330.732 30.1483   8
  -3  -9   0 268.773 30.1598   4
  -3  -9   0 339.376 30.1749   1
   3  -9   0 371.863 30.1469   5
  -3  -9   0 380.124 29.7168   5
  -3   9   0 337.792 30.1820   1
  -3   9   0 265.362 30.0224   5
   3   9   0 313.612 30.0029   2
  -3   9   0 347.976 30.2121   6
   3   9   0 333.183 30.2271   8
  -3   9   0 323.102 30.5857   7
   3   9   0 375.137 30.2270   1
   3   9   0 306.232 29.7755   3
  -3   9   0 318.280 30.1789   8
   3   9   0 328.485 30.1571   1
  -3   9   0 344.862 30.2570   2
  -3   9   0 336.109 30.2516   8
  -3   9   0 362.152 30.2099   1
   3   9   0 343.036 30.3514   4
   3   9   0 352.141 30.2308   8
   4  -9   0 138.783 12.3979   8
   4  -9   0 138.304 12.2171   1
  -4  -9   0 142.847 11.6215   5
   4  -9   0 136.305 12.1645   6
  -4  -9   0 132.307 12.2431   1
   4  -9   0 129.448 12.1725   8
  -4  -9   0 129.169 12.2937   8
  -4  -9   0 104.928 11.7920   2
   4  -9   0 118.070 12.2180   2
   4  -9   0 132.606 12.1322   1
  -4  -9   0 137.868 12.2269   8
  -4  -9   0 138.800 12.3408   6
  -4  -9   0 120.049 12.0961   1
   4  -9   0 115.236 13.0052   7
   4  -9   0 116.086 12.0806   5
  -4  -9   0 130.046 12.4232   4
   4   9   0 125.688 12.3012   8
  -4   9   0 125.619 12.1609   6
  -4   9   0 131.114 12.1981   1
   4   9   0 138.636 12.3501   8
  -4   9   0 128.277 12.3099   8
   4   9   0 135.877 12.1862   1
   4   9   0 130.724 12.4379   6
   4   9   0 109.277 12.3496   4
  -4   9   0 121.446 12.2218   1
   4   9   0 135.678 12.3274   1
  -4   9   0 138.284 12.3948   8
  -4   9   0 133.922 12.3901   2
   4   9   0 107.883 11.9616   2
   4   9   0 112.500 11.5954   3
  -4   9   0 122.214 12.7430   7
  -4   9   0 128.125 12.2910   5
   5  -9   0 1.60371 2.02491   1
  -5  -9   0 2.38073 2.02364   1
   5  -9   0 2.27374 2.12637   2
  -5  -9   0 3.52465 1.80244   6
  -5  -9   0 3.57635 1.60467   2
   5  -9   0 0.15582 2.25264   8
  -5  -9   0 2.68290 2.19437   8
  -5  -9   0 1.57814 2.54066   4
   5  -9   0 -0.8492 2.10050   5
  -5  -9   0 0.87908 2.06221   8
   5  -9   0 2.77789 1.93618   1
   5  -9   0 2.53799 2.05084   8
  -5  -9   0 2.68800 1.39486   5
  -5  -9   0 1.94755 2.10963   1
   5  -9   0 5.20795 2.86764   7
  -5   9   0 1.08261 2.03031   8
   5   9   0 4.94638 2.80223   4
   5   9   0 2.86672 2.21847   8
  -5   9   0 3.13985 2.49127   5
   5   9   0 3.16260 2.30907   8
  -5   9   0 1.68964 1.74608   2
  -5   9   0 2.12807 2.98384   7
  -5   9   0 3.73097 2.20882   1
   5   9   0 2.62680 2.53007   6
   5   9   0 6.57941 2.14153   1
  -5   9   0 1.47919 1.94630   6
  -5   9   0 7.32536 2.49740   8
  -5   9   0 -1.3403 1.98361   1
   5   9   0 3.13736 0.98236   3
   5   9   0 4.96498 2.20140   1
  -6  -9   0 639.762 55.0057   1
   6  -9   0 657.619 54.9875   1
  -6  -9   0 622.370 54.9239   1
  -6  -9   0 654.567 55.0020   8
  -6  -9   0 540.960 54.6483   2
   6  -9   0 646.646 55.0630   2
   6  -9   0 658.786 55.1043   8
   6  -9   0 555.024 55.0182   5
  -6  -9   0 552.019 54.5931   5
   6  -9   0 529.730 55.3404   7
  -6  -9   0 668.836 55.3150   4
  -6  -9   0 653.059 55.0829   8
   6  -9   0 635.906 54.9785   1
   6  -9   0 626.183 54.9958   8
  -6  -9   0 555.746 55.0168   6
  -6   9   0 601.603 55.0550   8
   6   9   0 566.683 55.1141   6
  -6   9   0 589.811 54.9066   6
  -6   9   0 681.603 55.0488   1
   6   9   0 707.237 55.0443   1
  -6   9   0 548.854 55.0922   5
  -6   9   0 576.874 55.0293   2
  -6   9   0 640.479 55.1093   8
   6   9   0 635.079 55.0669   8
   6   9   0 725.152 55.1458   8
  -6   9   0 574.205 54.9946   1
  -6   9   0 559.966 55.3455   7
   6   9   0 556.170 55.2011   4
   7  -9   0 495.835 51.1530   5
  -7  -9   0 597.681 51.4386   1
   7  -9   0 619.908 51.1810   1
  -7  -9   0 623.469 51.2627   8
  -7  -9   0 535.332 50.7947   5
   7  -9   0 599.972 51.1946   1
   7  -9   0 591.984 51.2212   8
  -7  -9   0 597.215 51.0415   1
  -7  -9   0 507.421 51.1521   6
   7  -9   0 557.201 51.1410   2
  -7  -9   0 523.326 51.2939   4
   7  -9   0 476.628 51.4543   7
  -7  -9   0 604.903 51.1256   8
  -7  -9   0 530.815 50.7667   2
   7  -9   0 631.453 51.2215   8
  -7   9   0 513.311 51.2250   5
  -7   9   0 618.912 51.1869   1
  -7   9   0 538.841 51.1434   8
   7   9   0 648.448 51.1562   1
  -7   9   0 553.635 51.1783   1
  -7   9   0 526.112 51.1695   2
  -7   9   0 552.465 51.5004   4
   7   9   0 507.435 51.3625   4
  -7   9   0 528.707 51.0000   6
   7   9   0 654.394 51.2872   8
   7   9   0 574.592 51.0900   1
   7   9   0 668.277 51.2899   8
   7   9   0 616.968 51.2205   7
   7   9   0 501.469 51.1490   6
  -7   9   0 561.682 51.2159   8
  -8  -9   0 126.156 12.8248   5
   8  -9   0 148.588 13.3091   8
  -8  -9   0 149.292 13.3069   8
  -8  -9   0 123.814 12.6334   2
  -8  -9   0 142.340 13.3781   8
  -8  -9   0 135.526 13.1251   1
  -8  -9   0 123.759 12.2178   3
   8  -9   0 115.371 13.9104   7
   8  -9   0 148.092 13.4635   8
   8  -9   0 167.305 13.4910   1
   8   9   0 151.174 13.4079   7
  -8   9   0 128.539 13.0111   6
   8   9   0 149.695 13.3352   1
  -8   9   0 123.268 13.3244   2
  -8   9   0 128.102 13.3375   8
   8   9   0 153.410 13.4255   8
   8   9   0 171.118 13.4769   1
  -8   9   0 144.233 13.3266   1
  -8   9   0 120.142 13.2208   1
   8   9   0 126.905 13.4432   6
   8   9   0 154.498 13.5250   8
   8   9   0 139.489 13.7934   4
  -8   9   0 137.541 13.6743   5
  -8   9   0 122.016 13.2702   8
   9  -9   0 188.321 17.9409   8
   9  -9   0 170.434 18.5747   7
  -9  -9   0 178.118 17.5948   5
  -9  -9   0 173.456 17.8560   8
  -9  -9   0 179.145 17.0525   3
  -9  -9   0 191.022 17.4186   2
  -9  -9   0 184.732 18.0456   8
   9  -9   0 216.759 18.0872   1
  -9  -9   0 195.872 17.8263   1
   9  -9   0 204.116 18.1465   8
  -9   9   0 197.803 18.1580   8
   9   9   0 187.936 18.4549   4
  -9   9   0 177.165 17.7562   6
   9   9   0 183.067 18.1511   6
   9   9   0 198.719 18.0221   8
   9   9   0 195.600 18.0726   8
   9   9   0 204.204 18.0607   7
  -9   9   0 176.333 17.9812   2
  -9   9   0 186.290 18.0246   1
   9   9   0 190.846 17.9375   1
   9   9   0 235.275 17.8838   5
  -9   9   0 178.197 18.1145   5
  -9   9   0 181.132 17.9664   8
  -9   9   0 191.457 17.9102   1
  10  -9   0 6.66715 2.87653   1
  10  -9   0 8.37153 3.23138   8
  10  -9   0 15.0537 4.36347   7
 -10  -9   0 13.0396 1.76895   3
  10  -9   0 9.58276 2.92090   8
 -10  -9   0 14.4921 2.22915   2
 -10  -9   0 11.3096 2.92008   8
 -10  -9   0 12.0798 3.43975   8
 -10  -9   0 13.0294 2.98634   1
 -10  -9   0 9.05730 2.68390   5
  10   9   0 10.9611 3.07885   5
  10   9   0 12.0701 3.15945   1
 -10   9   0 10.8319 3.05356   1
 -10   9   0 9.40173 2.95488   8
  10   9   0 12.0378 3.43842   6
  10   9   0 13.6337 3.62492   7
 -10   9   0 11.1897 3.82948   5
  10   9   0 12.4591 3.04453   1
 -10   9   0 8.44233 3.16526   8
 -10   9   0 10.4479 2.98978   2
  10   9   0 11.2797 3.19251   8
  10   9   0 6.86214 3.13727   8
 -10   9   0 15.4303 4.22725   1
  10   9   0 9.67638 4.01040   4
 -10   9   0 10.4607 2.54664   6
 -11  -9   0 22.7066 3.39038   5
 -11  -9   0 23.4760 3.27869   2
 -11  -9   0 19.0156 2.75229   3
 -11  -9   0 20.5237 3.67117   8
 -11  -9   0 20.3181 3.41706   1
  11  -9   0 14.8931 3.71009   1
  11  -9   0 19.7846 4.74814   7
  11  -9   0 17.3595 4.06343   8
  11   9   0 20.4883 3.83524   8
  11   9   0 19.1223 3.99539   6
 -11   9   0 20.1634 3.69976   8
  11   9   0 16.7756 3.83424   8
  11   9   0 17.7847 3.63097   1
  11   9   0 15.2264 4.58014   4
  11   9   0 24.9461 3.84976   5
 -11   9   0 14.9330 3.53978   2
 -11   9   0 18.1230 3.73929   1
 -11   9   0 18.0487 3.86419   8
 -11   9   0 24.7559 4.24608   5
  11   9   0 17.1004 4.07382   7
 -11   9   0 11.6804 3.21421   6
  12  -9   0 5.40626 3.18124   1
 -12  -9   0 2.60435 1.90303   2
 -12  -9   0 4.19827 2.77897   1
 -12  -9   0 6.74314 2.91790   5
  12  -9   0 5.24239 3.49865   8
 -12  -9   0 5.37061 2.91620   8
 -12  -9   0 6.26143 1.81094   3
  12  -9   0 9.14557 4.32739   7
 -12   9   0 2.48452 2.79907   1
 -12   9   0 5.89992 2.38361   6
  12   9   0 10.3243 4.30972   4
  12   9   0 12.0641 3.43486   7
  12   9   0 5.69517 3.04794   5
  12   9   0 7.17030 3.31515   6
  12   9   0 2.74608 3.09146   8
  12   9   0 8.85403 3.13600   1
 -12   9   0 5.75357 3.31098   2
 -12   9   0 8.00668 3.20422   8
 -12   9   0 4.53244 3.97555   5
 -12   9   0 3.22097 3.21688   8
  12   9   0 3.53133 3.12493   8
 -13  -9   0 63.0024 8.02583   1
  13  -9   0 65.5387 8.73742   8
 -13  -9   0 63.9923 6.97788   3
 -13  -9   0 74.4155 6.98093   2
  13  -9   0 66.1513 8.38902   1
 -13  -9   0 81.2878 7.27094   2
 -13  -9   0 72.6343 7.89643   5
 -13  -9   0 64.1586 8.15677   8
  13  -9   0 64.2799 9.33836   7
  13   9   0 68.6035 8.50980   6
 -13   9   0 80.1254 8.48682   2
 -13   9   0 61.2009 8.41142   8
 -13   9   0 72.4586 8.58832   1
 -13   9   0 69.8115 8.14105   8
  13   9   0 78.5959 8.54048   8
  13   9   0 63.4004 8.24441   7
 -13   9   0 73.5160 8.61905   5
 -13   9   0 81.2555 7.98682   6
  13   9   0 62.7209 8.49402   8
  13   9   0 73.7026 9.35522   4
  13   9   0 58.4935 8.19785   1
  14  -9   0 53.3754 8.38000   8
  14  -9   0 59.3836 8.15935   1
 -14  -9   0 66.7100 6.64841   2
 -14  -9   0 69.4924 7.99763   8
 -14  -9   0 77.2176 7.75071   5
  14  -9   0 50.0560 8.95330   7
 -14  -9   0 54.3010 7.82962   1
 -14   9   0 83.4869 9.43053   5
  14   9   0 73.7728 8.45729   6
  14   9   0 50.9474 8.15843   8
 -14   9   0 71.3567 8.42306   8
  14   9   0 67.1163 9.14990   4
 -14   9   0 52.7597 7.90563   8
 -14   9   0 78.2729 8.57085   2
 -14   9   0 64.1128 8.15601   1
  14   9   0 53.0865 7.95981   1
  14   9   0 68.4589 8.64019   7
  14   9   0 60.6247 8.23349   8
 -15  -9   0 9.11399 3.60733   5
 -15  -9   0 5.93067 2.93495   1
 -15  -9   0 1.87661 2.92869   8
 -15  -9   0 8.77254 2.00634   2
  15  -9   0 9.76984 4.09847   8
  15  -9   0 8.33488 4.64624   7
  15  -9   0 13.3199 3.88059   1
  15   9   0 11.0713 5.12213   4
 -15   9   0 10.2113 3.77669   8
 -15   9   0 5.93419 3.45244   1
  15   9   0 9.19386 3.88569   8
  15   9   0 9.35879 4.24345   7
 -15   9   0 5.65902 3.61165   2
 -15   9   0 10.6393 4.72896   5
  15   9   0 6.88567 3.61654   1
  16  -9   0 23.7259 4.81415   1
 -16  -9   0 25.0171 4.84581   5
 -16  -9   0 21.9179 4.15698   1
  16  -9   0 20.0096 5.61218   7
 -16   9   0 16.4249 5.39320   5
 -16   9   0 21.7518 4.55568   1
 -16   9   0 18.8676 4.48467   8
  16   9   0 24.3843 5.14326   8
  16   9   0 20.9802 5.95928   4
  16   9   0 10.0136 4.05266   1
 -16   9   0 34.6338 5.07534   2
  16   9   0 20.0472 5.06163   7
 -17  -9   0 3.35659 3.03524   1
  17  -9   0 6.38992 4.82868   7
  17  -9   0 -0.2615 3.57233   1
 -17  -9   0 -3.1645 3.48607   5
 -17   9   0 1.95960 3.65847   8
  17   9   0 -4.9243 3.48249   8
  17   9   0 -8.1771 3.76522   7
  17   9   0 3.09410 4.73857   4
 -17   9   0 0.47304 4.53166   5
 -17   9   0 8.48193 3.86028   2
  17   9   0 -0.4275 3.33771   1
 -17   9   0 2.70005 3.40414   1
  18  -9   0 44.2854 7.57387   7
 -18  -9   0 31.0335 5.66499   1
  18  -9   0 37.9429 6.33065   1
 -18  -9   0 58.2733 7.79832   5
  18   9   0 52.3502 8.13978   4
  18   9   0 24.9567 6.13355   8
 -18   9   0 33.9207 5.84841   2
  18   9   0 36.9408 6.15670   1
 -18   9   0 37.9764 6.33294   8
 -18   9   0 42.8362 6.39615   1
 -18   9   0 45.0406 7.76358   5
  18   9   0 41.1605 6.82408   7
 -19  -9   0 22.5152 5.31827   1
  19  -9   0 42.8461 7.52091   7
  19  -9   0 36.8462 6.32397   1
 -19  -9   0 47.0982 6.87366   5
  19   9   0 32.5776 6.35126   7
 -19   9   0 41.9647 6.26923   1
  19   9   0 24.7380 5.74073   1
  19   9   0 31.5393 7.32165   4
 -19   9   0 43.8327 6.30078   2
 -19   9   0 40.1092 7.93188   5
 -20  -9   0 16.0530 5.17572   5
  20  -9   0 13.5969 4.72307   1
 -20  -9   0 8.33828 4.06695   1
  20  -9   0 10.6786 5.48128   7
 -20   9   0 12.6350 6.22161   5
 -20   9   0 6.67831 3.83519   2
  20   9   0 16.8891 5.94727   4
 -20   9   0 12.2466 4.41048   1
  20   9   0 13.9664 4.50904   1
   0 -10   0 384.679 32.5957   5
   0 -10   0 352.316 32.8937   1
   0 -10   0 341.434 32.9037   8
   0 -10   0 333.133 32.8393   1
   0 -10   0 370.332 33.0193   6
   0 -10   0 380.734 33.0247   8
   0 -10   0 366.305 32.8933   2
   0  10   0 356.960 33.0604   4
   0  10   0 383.929 33.1113   6
   0  10   0 375.339 32.9629   1
   0  10   0 375.052 32.9691   2
   0  10   0 349.936 32.9874   8
   0  10   0 333.757 32.9214   1
   0  10   0 382.424 33.0719   8
   1 -10   0 146.812 14.6520   1
  -1 -10   0 166.288 14.2364   5
  -1 -10   0 153.097 14.7152   1
   1 -10   0 168.988 14.4194   5
   1 -10   0 162.379 14.7474   2
  -1 -10   0 154.254 14.6266   2
  -1 -10   0 149.816 14.6765   6
  -1 -10   0 169.368 14.7712   1
   1 -10   0 151.224 14.7246   8
  -1 -10   0 148.553 14.7405   8
   1 -10   0 160.085 14.8255   6
   1 -10   0 142.575 14.6709   1
  -1 -10   0 166.773 14.8552   8
  -1  10   0 158.347 14.8249   2
  -1  10   0 158.521 15.2855   7
  -1  10   0 161.493 14.7997   1
  -1  10   0 158.870 14.7508   6
   1  10   0 160.681 14.7889   1
   1  10   0 162.847 14.7646   2
   1  10   0 146.871 14.8787   4
   1  10   0 162.780 14.8633   8
  -1  10   0 153.657 14.8512   1
   1  10   0 158.780 14.9362   6
  -1  10   0 149.323 14.8615   8
   1  10   0 155.483 14.8535   8
  -1  10   0 158.656 14.9029   8
   1  10   0 134.582 14.6916   1
  -2 -10   0 46.7273 5.96444   8
  -2 -10   0 56.0127 5.99700   1
   2 -10   0 60.9417 6.09398   2
  -2 -10   0 55.3070 5.71148   2
   2 -10   0 51.8307 6.16257   8
   2 -10   0 51.2536 5.94615   1
   2 -10   0 53.0878 5.50558   5
  -2 -10   0 49.9735 5.95599   1
   2 -10   0 54.5208 5.88814   1
   2 -10   0 55.4081 6.08209   6
  -2 -10   0 54.1808 6.08626   8
  -2 -10   0 51.4380 5.12972   5
   2 -10   0 52.1233 6.18602   8
  -2 -10   0 49.9363 6.09491   6
   2  10   0 53.4225 6.26772   4
   2  10   0 65.6105 6.11883   1
  -2  10   0 54.4043 6.02907   1
   2  10   0 48.2653 5.86841   2
  -2  10   0 55.5652 6.27379   2
   2  10   0 50.9184 6.03987   1
   2  10   0 55.8898 6.17621   8
  -2  10   0 48.6830 6.13635   8
   2  10   0 46.5642 6.13024   8
  -2  10   0 49.7539 6.18630   6
  -2  10   0 62.0628 6.00003   5
   2  10   0 58.2110 6.38482   6
  -2  10   0 49.7701 6.04349   1
  -2  10   0 60.4000 6.36325   8
  -2  10   0 44.3562 6.69956   7
   3 -10   0 758.984 69.5286   8
   3 -10   0 753.469 69.4987   1
  -3 -10   0 799.932 69.5570   1
  -3 -10   0 786.371 69.6457   6
  -3 -10   0 746.732 69.4827   1
   3 -10   0 793.961 69.6095   8
  -3 -10   0 816.332 69.5940   8
  -3 -10   0 804.715 69.4178   2
  -3 -10   0 811.200 69.7327   4
  -3 -10   0 805.910 69.5980   8
   3 -10   0 782.869 69.5175   1
   3 -10   0 824.619 69.5917   6
   3 -10   0 844.621 69.6262   2
  -3  10   0 677.628 69.5436   2
  -3  10   0 769.202 69.9593   7
   3  10   0 720.144 69.6521   6
   3  10   0 746.030 69.2076   3
   3  10   0 707.149 69.4089   2
   3  10   0 779.845 69.6144   8
   3  10   0 818.382 69.6301   8
  -3  10   0 781.511 69.6193   8
   3  10   0 767.370 69.5640   1
  -3  10   0 736.653 69.5595   6
  -3  10   0 846.064 69.6988   8
   3  10   0 784.406 69.5275   1
  -3  10   0 798.751 69.5693   1
   3  10   0 662.566 69.5927   4
  -3  10   0 766.969 69.5747   1
  -3  10   0 842.230 69.5859   5
  -4 -10   0 14.8483 2.83578   8
   4 -10   0 11.3837 2.67738   2
  -4 -10   0 15.5858 2.75283   1
   4 -10   0 13.8295 2.89949   8
  -4 -10   0 14.3028 2.79695   1
   4 -10   0 13.7010 4.06007   7
  -4 -10   0 19.4373 2.17153   5
   4 -10   0 12.5155 2.71889   1
  -4 -10   0 21.1424 3.01575   8
  -4 -10   0 11.4074 2.87028   6
   4 -10   0 11.3732 2.65306   5
   4 -10   0 15.0884 2.70431   1
   4 -10   0 14.0891 2.77278   8
   4 -10   0 13.8459 2.65617   6
  -4 -10   0 13.2540 2.23137   2
  -4 -10   0 18.0939 3.22992   4
  -4  10   0 9.56148 3.05561   7
   4  10   0 11.1860 2.90241   8
  -4  10   0 9.65943 2.85310   8
  -4  10   0 10.5508 2.95114   8
   4  10   0 10.9594 2.00380   3
   4  10   0 15.0447 2.73096   1
   4  10   0 13.3611 2.38023   2
  -4  10   0 15.9315 2.82352   1
   4  10   0 10.9788 2.73863   1
  -4  10   0 13.2297 2.79354   6
   4  10   0 14.7436 3.13184   6
   4  10   0 13.2398 2.94093   8
  -4  10   0 13.2841 3.00793   1
  -4  10   0 15.4291 3.00945   2
   4  10   0 18.3065 3.39155   4
  -4  10   0 14.9206 2.97451   5
  -5 -10   0 1463.43 126.490   1
  -5 -10   0 1515.70 126.429   1
   5 -10   0 1491.23 126.565   8
   5 -10   0 1353.51 126.395   1
   5 -10   0 1470.17 126.467   1
  -5 -10   0 1497.81 126.478   8
  -5 -10   0 1533.56 126.578   8
   5 -10   0 1187.78 126.794   7
   5 -10   0 1432.98 126.463   8
  -5 -10   0 1376.18 126.550   6
   5 -10   0 1583.41 126.589   2
  -5 -10   0 1231.54 126.184   2
   5 -10   0 1214.96 126.388   5
  -5 -10   0 1561.45 126.757   4
  -5 -10   0 1471.71 126.033   5
  -5  10   0 1314.12 126.512   2
   5  10   0 1415.14 125.951   3
   5  10   0 1413.77 126.299   2
  -5  10   0 1368.05 126.504   8
  -5  10   0 1349.52 126.473   1
   5  10   0 1539.79 126.555   8
   5  10   0 1499.13 126.737   4
  -5  10   0 1329.41 126.522   5
   5  10   0 1479.35 126.553   8
   5  10   0 1600.45 126.526   1
   5  10   0 1184.95 126.499   6
  -5  10   0 1392.95 126.450   6
  -5  10   0 1543.28 126.631   8
  -5  10   0 1515.44 126.505   1
  -5  10   0 1209.69 126.698   7
   5  10   0 1445.81 126.490   1
  -6 -10   0 162.329 15.4466   5
  -6 -10   0 145.705 16.0373   4
   6 -10   0 172.364 15.9959   8
   6 -10   0 170.892 16.0315   1
   6 -10   0 171.423 15.9957   1
  -6 -10   0 178.234 16.2731   1
  -6 -10   0 174.246 16.0272   8
   6 -10   0 178.644 16.2103   8
   6 -10   0 152.499 15.9938   5
  -6 -10   0 147.158 15.6164   2
  -6 -10   0 144.366 16.1651   6
  -6 -10   0 165.184 15.9642   1
   6 -10   0 168.405 16.8438   7
  -6 -10   0 181.220 16.1647   8
   6  10   0 166.516 16.4067   4
   6  10   0 169.715 16.0405   1
  -6  10   0 169.645 16.0841   1
   6  10   0 179.994 16.1644   8
  -6  10   0 141.461 16.0548   2
   6  10   0 187.774 15.5210   5
  -6  10   0 180.309 16.2744   5
   6  10   0 194.000 16.1953   8
   6  10   0 153.620 16.2051   6
  -6  10   0 183.060 16.1362   1
  -6  10   0 180.941 16.1854   8
   6  10   0 190.374 16.1000   1
  -6  10   0 183.209 16.2642   8
  -6  10   0 160.000 15.8960   6
   7 -10   0 96.6500 12.1786   7
  -7 -10   0 122.043 11.2552   1
   7 -10   0 119.969 11.5430   8
  -7 -10   0 100.929 10.8006   2
  -7 -10   0 103.884 10.7493   5
   7 -10   0 110.849 11.3159   1
  -7 -10   0 118.497 11.3603   8
   7 -10   0 104.462 11.3854   5
   7 -10   0 117.411 11.3262   8
  -7 -10   0 131.670 11.5537   8
   7  10   0 123.058 11.4931   8
  -7  10   0 99.7010 11.5947   5
  -7  10   0 110.935 11.4845   8
  -7  10   0 104.442 11.8464   4
   7  10   0 112.142 11.6506   6
   7  10   0 132.342 11.5519   8
  -7  10   0 105.835 11.5011   2
   7  10   0 135.986 11.5921   7
  -7  10   0 94.2449 11.0475   6
  -7  10   0 101.337 11.3720   1
   7  10   0 123.768 11.3660   1
  -7  10   0 114.719 11.5474   8
  -7  10   0 110.342 11.2989   1
   7  10   0 118.821 11.8991   4
   7  10   0 133.058 11.4120   1
   7  10   0 133.987 10.9161   5
  -8 -10   0 116.804 12.2273   5
  -8 -10   0 140.196 12.7746   8
  -8 -10   0 118.265 12.8007   8
  -8 -10   0 110.791 12.1304   2
   8 -10   0 125.166 12.6888   8
   8 -10   0 137.015 12.9859   8
   8 -10   0 135.738 12.7591   1
  -8 -10   0 127.928 12.5708   1
   8 -10   0 98.4974 13.3679   7
  -8  10   0 134.015 13.2047   5
   8  10   0 123.485 13.2304   4
   8  10   0 138.334 12.8046   1
  -8  10   0 135.473 12.8438   1
  -8  10   0 131.886 12.9476   1
   8  10   0 146.088 12.9689   8
   8  10   0 137.170 12.8600   7
   8  10   0 145.351 12.7734   1
   8  10   0 158.091 12.3829   5
   8  10   0 156.358 12.9953   8
  -8  10   0 130.087 12.9091   8
  -8  10   0 119.512 12.8536   2
  -8  10   0 113.721 12.7482   8
   8  10   0 123.256 12.9802   6
  -8  10   0 121.742 12.6499   6
   9 -10   0 296.332 25.8783   1
  -9 -10   0 297.716 25.7323   1
  -9 -10   0 285.060 26.0118   8
  -9 -10   0 280.909 25.3092   2
   9 -10   0 268.007 25.7666   8
  -9 -10   0 268.131 25.7329   8
  -9 -10   0 276.667 25.4246   5
   9 -10   0 256.856 26.4180   7
   9 -10   0 288.477 25.9951   8
   9  10   0 290.809 25.8325   1
  -9  10   0 252.278 25.8658   1
  -9  10   0 263.311 25.9066   2
   9  10   0 257.984 26.0107   6
  -9  10   0 277.874 26.0586   5
   9  10   0 310.012 25.9526   7
  -9  10   0 255.832 25.5857   6
   9  10   0 313.698 25.9735   8
   9  10   0 296.260 25.9624   8
   9  10   0 315.195 25.8874   1
  -9  10   0 235.914 25.7347   8
   9  10   0 265.774 26.0623   4
  -9  10   0 288.966 25.9825   8
 -10 -10   0 56.7425 7.17098   1
  10 -10   0 59.6595 8.48685   7
 -10 -10   0 51.9145 7.21315   8
  10 -10   0 74.6259 7.81943   1
 -10 -10   0 65.0763 6.85361   5
  10 -10   0 58.9542 7.60571   8
 -10 -10   0 67.9627 6.46733   2
 -10  10   0 67.9212 7.15513   6
 -10  10   0 57.2000 8.01679   5
  10  10   0 64.5575 7.64460   8
 -10  10   0 51.7075 7.42941   8
  10  10   0 60.4497 7.47416   8
  10  10   0 57.6990 8.06540   4
  10  10   0 71.2939 7.86447   6
 -10  10   0 67.3560 7.61762   2
 -10  10   0 60.8180 7.54494   1
  10  10   0 66.8727 6.97428   5
  10  10   0 74.2613 7.99476   7
  10  10   0 53.0366 7.23926   1
 -10  10   0 55.5277 7.54194   8
 -11 -10   0 9.18488 2.06227   2
  11 -10   0 3.87341 3.22340   8
  11 -10   0 7.17525 3.08614   1
 -11 -10   0 6.53900 2.84680   1
 -11 -10   0 1.96654 2.40374   5
 -11 -10   0 5.30827 2.79604   8
 -11 -10   0 8.53095 1.35764   3
  11 -10   0 5.82781 4.18347   7
 -11  10   0 7.98580 3.10719   1
  11  10   0 5.17327 2.80549   5
 -11  10   0 6.15064 3.17864   8
  11  10   0 5.81194 3.18986   8
  11  10   0 5.30346 2.87783   1
 -11  10   0 2.77395 2.84973   8
  11  10   0 8.37060 3.59728   7
  11  10   0 7.07035 3.39757   6
 -11  10   0 7.02919 2.40818   6
 -11  10   0 6.33728 3.27713   2
  11  10   0 4.05530 3.95980   4
 -11  10   0 6.11772 3.80422   5
  11  10   0 4.98368 3.18848   8
 -12 -10   0 180.681 16.0272   5
 -12 -10   0 161.951 16.2970   8
 -12 -10   0 173.911 15.2228   3
  12 -10   0 171.704 16.4573   1
  12 -10   0 154.073 17.1774   7
 -12 -10   0 178.966 15.6120   2
 -12 -10   0 175.120 16.2616   1
  12 -10   0 161.755 16.6156   8
  12  10   0 153.369 16.5006   6
  12  10   0 164.634 16.5256   7
  12  10   0 173.242 17.1463   4
 -12  10   0 139.001 16.2655   8
  12  10   0 173.291 16.4971   8
  12  10   0 155.455 16.4721   8
 -12  10   0 167.255 17.0861   5
 -12  10   0 155.734 16.5534   1
  12  10   0 191.116 16.3217   5
 -12  10   0 166.740 15.9985   6
 -12  10   0 184.092 16.6004   2
  12  10   0 141.389 16.2177   1
 -12  10   0 173.017 16.5985   8
  13 -10   0 10.0750 4.52116   7
  13 -10   0 17.7407 4.02865   1
  13 -10   0 11.3543 3.91554   8
 -13 -10   0 11.7982 2.31732   2
 -13 -10   0 11.3121 2.07895   3
 -13 -10   0 10.0687 3.14384   1
 -13 -10   0 18.4060 3.64286   8
 -13 -10   0 10.7049 3.36137   5
 -13  10   0 15.2783 4.72778   5
  13  10   0 22.2891 4.46253   7
  13  10   0 11.0681 4.80192   4
 -13  10   0 12.4909 3.57217   2
 -13  10   0 4.05037 3.29241   1
  13  10   0 12.7954 3.80373   6
 -13  10   0 8.29622 3.75698   8
  13  10   0 10.1971 3.64216   1
 -13  10   0 12.6495 3.79423   8
  13  10   0 12.0074 3.74745   8
  13  10   0 15.9052 3.99893   8
 -13  10   0 17.1044 3.32673   6
 -14 -10   0 29.9187 3.83444   2
 -14 -10   0 28.3042 4.75242   8
  14 -10   0 25.5571 5.18979   8
  14 -10   0 27.0514 5.07448   1
 -14 -10   0 35.9913 5.47798   5
 -14 -10   0 23.1897 4.56442   1
  14 -10   0 35.2315 6.50499   7
 -14  10   0 28.4343 4.50438   6
 -14  10   0 26.6604 4.96122   8
  14  10   0 20.4230 4.68653   1
  14  10   0 33.5367 5.55355   7
  14  10   0 29.4951 5.63929   6
 -14  10   0 29.3133 5.02551   1
 -14  10   0 39.0621 5.43157   2
 -14  10   0 38.8121 6.37686   5
 -14  10   0 26.5272 6.02373   8
  14  10   0 25.7868 5.11950   8
  14  10   0 32.0363 6.30101   4
 -15 -10   0 12.2771 3.20457   5
 -15 -10   0 3.82638 3.04697   1
  15 -10   0 10.2844 4.21801   8
  15 -10   0 10.7966 4.96074   7
  15 -10   0 5.98822 3.79546   1
 -15 -10   0 8.34260 3.23627   8
  15  10   0 4.48833 3.51748   7
 -15  10   0 13.4083 3.77356   2
  15  10   0 10.6062 4.84589   4
 -15  10   0 -0.4363 3.23980   8
 -15  10   0 8.93996 3.79874   1
 -15  10   0 9.09669 4.78165   5
 -15  10   0 5.48382 2.71518   6
  15  10   0 9.16883 3.71359   1
  15  10   0 9.79472 3.88306   6
  15  10   0 5.48445 3.60672   8
  16 -10   0 12.7215 4.14426   1
 -16 -10   0 15.9024 3.84198   5
 -16 -10   0 16.6103 3.77108   1
  16 -10   0 13.2175 5.39906   7
  16  10   0 10.1172 4.55886   7
  16  10   0 15.0045 4.36765   8
 -16  10   0 9.45930 4.05085   8
 -16  10   0 15.1745 4.21974   1
 -16  10   0 6.74807 3.70840   2
  16  10   0 15.3516 4.10025   1
 -16  10   0 10.7354 3.47960   6
 -16  10   0 21.5891 5.89347   5
  16  10   0 20.1493 5.71152   4
  17 -10   0 78.0215 10.5508   1
  17 -10   0 96.8986 11.5371   7
 -17 -10   0 88.7939 9.72663   5
 -17 -10   0 67.8881 9.90978   1
 -17  10   0 103.213 10.8333   2
  17  10   0 88.0841 11.3975   4
 -17  10   0 102.999 11.8713   5
 -17  10   0 80.1643 10.2803   1
  17  10   0 74.6996 10.0364   1
 -17  10   0 75.6136 9.41110   6
  17  10   0 70.8263 10.4615   8
  17  10   0 100.523 10.8747   7
 -17  10   0 79.8468 10.4526   8
 -18 -10   0 14.6893 4.12408   5
  18 -10   0 11.4158 4.48022   1
 -18 -10   0 13.7256 3.92023   1
  18 -10   0 12.8129 5.51206   7
  18  10   0 7.22329 4.05019   1
 -18  10   0 10.3606 4.32650   2
  18  10   0 10.8637 4.79368   7
  18  10   0 18.9295 5.94702   4
 -18  10   0 3.80055 3.29552   6
 -18  10   0 20.3861 4.65204   1
 -18  10   0 13.0203 4.42680   8
  18  10   0 10.5513 4.50123   8
 -18  10   0 17.5903 6.18667   5
 -19 -10   0 24.0867 5.20060   5
  19 -10   0 15.2743 5.24771   1
 -19 -10   0 27.2440 4.99436   1
  19 -10   0 18.2645 6.25656   7
 -19  10   0 24.6155 5.35869   1
  19  10   0 28.4970 6.08180   7
  19  10   0 20.6876 5.15819   1
 -19  10   0 33.2198 5.33070   2
  19  10   0 25.1903 6.65876   4
 -19  10   0 36.6305 7.52483   5
 -20 -10   0 47.8847 6.99906   5
 -20 -10   0 23.2574 5.29468   1
  20 -10   0 33.1091 7.39684   7
  20 -10   0 22.6485 5.92457   1
  20  10   0 38.9579 7.85731   4
 -20  10   0 31.9690 7.94593   5
 -20  10   0 40.6345 6.37347   2
  20  10   0 35.2603 6.10607   1
 -20  10   0 36.9093 6.34324   1
   0 -11   0 0.97235 2.09719   8
   0 -11   0 -0.0522 1.79145   1
   0 -11   0 -0.5228 1.87370   8
   0 -11   0 1.03405 1.81486   2
   0 -11   0 -1.3434 1.54912   6
   0 -11   0 -1.1827 1.91088   1
   0 -11   0 -0.6451 1.28009   5
   0  11   0 -0.5830 2.15156   8
   0  11   0 5.06955 2.28368   1
   0  11   0 1.60616 2.00634   1
   0  11   0 0.56971 2.16590   8
   0  11   0 3.30524 2.33277   4
   0  11   0 1.16363 2.86821   7
   0  11   0 0.80215 2.40893   6
   0  11   0 -1.0991 2.08355   2
  -1 -11   0 15.6566 2.88409   1
  -1 -11   0 16.9522 2.93400   1
   1 -11   0 13.0132 2.85196   1
  -1 -11   0 19.6461 2.81037   2
   1 -11   0 18.0972 3.09769   6
   1 -11   0 18.6502 2.95958   1
   1 -11   0 12.2511 2.95421   8
  -1 -11   0 20.2355 3.08619   8
  -1 -11   0 16.2979 3.12120   6
   1 -11   0 15.2959 2.60414   2
   1 -11   0 19.6692 2.62736   5
  -1 -11   0 15.7541 2.97958   8
   1 -11   0 18.6755 2.96602   8
  -1 -11   0 19.5881 2.39004   5
  -1  11   0 9.98851 2.77634   1
  -1  11   0 16.4453 3.32035   6
   1  11   0 20.8401 3.29101   1
  -1  11   0 13.5026 2.96736   1
  -1  11   0 16.1655 3.15573   2
  -1  11   0 16.9656 3.83466   7
   1  11   0 13.3866 3.11207   8
   1  11   0 14.2343 3.23853   6
   1  11   0 16.5694 2.97205   1
  -1  11   0 20.3749 3.20006   8
   1  11   0 19.0659 3.03574   2
  -1  11   0 19.1754 3.24181   8
   1  11   0 11.1935 2.96204   8
   1  11   0 18.4735 3.30778   4
   2 -11   0 236.729 21.9054   1
   2 -11   0 252.081 21.9664   6
   2 -11   0 197.409 21.7016   2
  -2 -11   0 229.681 21.8675   6
   2 -11   0 223.514 21.8495   8
  -2 -11   0 230.291 21.8819   8
  -2 -11   0 244.088 21.9437   8
   2 -11   0 236.555 21.8610   1
  -2 -11   0 224.883 21.8271   1
   2 -11   0 257.511 21.6720   5
  -2 -11   0 247.391 21.8841   1
   2 -11   0 218.576 21.9236   8
  -2 -11   0 249.580 21.3041   5
  -2 -11   0 229.858 21.6893   2
   2  11   0 248.072 21.8875   1
   2  11   0 251.368 21.8723   2
  -2  11   0 217.962 22.3219   7
  -2  11   0 239.308 22.0684   8
  -2  11   0 247.514 22.0295   2
  -2  11   0 257.494 21.8080   5
  -2  11   0 254.444 21.9264   1
   2  11   0 241.510 22.1088   6
   2  11   0 240.975 22.0766   4
  -2  11   0 246.217 22.0554   8
  -2  11   0 227.975 21.9258   1
   2  11   0 236.198 21.9375   8
   2  11   0 218.287 21.9610   8
  -2  11   0 233.386 21.9864   6
   2  11   0 226.762 21.9225   1
   3 -11   0 483.382 43.1891   8
  -3 -11   0 478.123 43.1997   8
   3 -11   0 511.505 43.2278   2
  -3 -11   0 481.597 43.0014   2
   3 -11   0 441.615 43.1894   8
  -3 -11   0 483.369 43.1183   1
  -3 -11   0 545.659 42.6500   5
  -3 -11   0 505.335 43.1912   1
  -3 -11   0 449.867 43.2817   4
   3 -11   0 527.906 43.0939   5
  -3 -11   0 398.748 43.1321   6
   3 -11   0 476.035 43.1741   6
  -3 -11   0 504.645 43.2112   8
   3 -11   0 460.756 43.1163   1
   3 -11   0 489.291 43.1375   1
  -3  11   0 454.982 43.0757   5
  -3  11   0 454.756 43.1628   1
  -3  11   0 527.505 43.2423   1
  -3  11   0 487.666 43.2933   8
   3  11   0 467.853 43.3163   4
   3  11   0 500.007 43.3913   6
  -3  11   0 425.135 43.1524   8
   3  11   0 485.739 43.2713   8
   3  11   0 413.736 42.7557   3
   3  11   0 452.898 43.1420   1
  -3  11   0 498.382 43.3006   6
   3  11   0 491.440 43.2604   8
   3  11   0 506.062 43.1788   1
   3  11   0 455.554 43.0420   2
  -4 -11   0 8.50214 2.09325   2
  -4 -11   0 4.27405 2.44384   8
   4 -11   0 6.28640 2.61464   8
  -4 -11   0 6.24348 2.53135   6
   4 -11   0 6.58992 2.27819   5
   4 -11   0 9.10220 2.46144   1
  -4 -11   0 10.8562 2.69198   8
  -4 -11   0 8.10614 2.86436   4
   4 -11   0 8.31700 2.37783   8
  -4 -11   0 6.16716 2.53644   1
   4 -11   0 7.17341 2.41677   2
  -4 -11   0 6.11286 2.41119   1
   4 -11   0 6.04595 2.22332   1
   4 -11   0 7.14750 2.35505   6
  -4 -11   0 9.48192 1.47180   5
  -4  11   0 8.99185 2.62981   1
   4  11   0 8.04387 2.48845   1
   4  11   0 6.60093 2.95469   4
  -4  11   0 8.93355 2.54081   1
  -4  11   0 8.16291 2.62205   6
   4  11   0 8.62364 2.69798   8
   4  11   0 4.24106 2.55317   1
  -4  11   0 10.1855 2.89527   8
   4  11   0 10.7660 2.33598   2
   4  11   0 5.96492 1.66249   3
   4  11   0 -0.5454 2.52876   8
  -4  11   0 7.27681 2.58072   5
  -4  11   0 7.99275 2.27904   2
   4  11   0 4.90277 2.85242   6
  -4  11   0 6.15258 2.81043   7
  -4  11   0 9.05272 2.69806   8
  -5 -11   0 650.419 64.8111   2
   5 -11   0 751.258 65.2379   8
  -5 -11   0 717.823 65.0332   1
  -5 -11   0 829.287 64.6123   5
   5 -11   0 761.971 65.0978   6
   5 -11   0 759.959 65.1560   5
  -5 -11   0 625.988 65.2037   4
  -5 -11   0 739.862 65.1186   8
   5 -11   0 734.481 65.7628   7
  -5 -11   0 780.306 65.2196   8
   5 -11   0 717.276 65.0831   1
   5 -11   0 705.101 65.0718   8
  -5  11   0 700.028 65.1764   8
  -5  11   0 704.362 65.1821   5
   5  11   0 726.560 65.1980   8
   5  11   0 719.688 65.3431   4
   5  11   0 631.503 64.8870   2
   5  11   0 735.562 65.3236   6
   5  11   0 812.249 65.1771   1
   5  11   0 714.626 65.1328   1
  -5  11   0 646.847 65.0725   1
  -5  11   0 754.629 65.2754   8
   5  11   0 713.054 64.5713   3
   5  11   0 792.484 65.2544   8
  -5  11   0 747.402 65.1563   1
  -5  11   0 690.965 65.0777   6
  -6 -11   0 505.983 41.4586   4
   6 -11   0 456.599 41.0490   1
  -6 -11   0 449.741 40.9698   1
  -6 -11   0 408.171 40.7204   2
   6 -11   0 435.373 41.1629   8
  -6 -11   0 508.233 41.2688   8
   6 -11   0 385.031 41.0072   5
  -6 -11   0 459.772 40.5446   5
   6 -11   0 465.959 41.0683   8
  -6 -11   0 490.649 41.1364   8
   6 -11   0 392.407 41.5993   7
   6  11   0 507.229 41.2715   8
   6  11   0 528.470 41.1883   1
  -6  11   0 423.837 41.0072   6
   6  11   0 377.180 41.0600   6
  -6  11   0 368.664 41.0494   2
  -6  11   0 435.203 41.1016   1
   6  11   0 466.426 41.1221   1
  -6  11   0 468.106 41.2538   8
   6  11   0 525.307 40.3607   3
  -6  11   0 449.433 41.1781   8
   6  11   0 534.353 41.2674   8
  -6  11   0 384.930 41.1045   5
   6  11   0 420.881 41.3537   4
  -6  11   0 484.635 41.1269   1
   7 -11   0 365.172 30.4606   8
   7 -11   0 327.692 30.2371   1
  -7 -11   0 362.231 30.3002   8
  -7 -11   0 335.843 30.1515   1
   7 -11   0 335.812 30.2438   8
  -7 -11   0 304.092 29.8400   2
  -7 -11   0 331.245 30.3109   8
  -7 -11   0 290.548 29.7006   5
   7 -11   0 281.483 30.6851   7
  -7  11   0 338.426 30.3918   8
   7  11   0 373.547 30.3296   1
   7  11   0 280.741 30.2470   6
   7  11   0 387.578 30.4547   8
  -7  11   0 314.944 30.4537   5
  -7  11   0 340.230 30.4072   8
  -7  11   0 302.605 30.1145   6
  -7  11   0 313.117 30.3626   2
   7  11   0 375.908 29.8278   5
  -7  11   0 369.458 30.3745   1
   7  11   0 302.585 30.5703   4
  -7  11   0 318.653 30.3176   1
   8 -11   0 24.8013 4.24569   8
  -8 -11   0 23.6328 3.97146   8
   8 -11   0 26.4644 4.04297   1
   8 -11   0 25.2564 3.96903   8
  -8 -11   0 26.6120 3.69149   2
  -8 -11   0 27.4966 4.23672   8
  -8 -11   0 21.3675 3.86054   1
  -8 -11   0 22.5382 3.58043   5
   8 -11   0 25.6873 5.56236   7
  -8  11   0 23.2867 4.23134   8
  -8  11   0 22.2647 4.09027   8
  -8  11   0 23.3501 4.58178   5
  -8  11   0 21.2112 3.95405   1
  -8  11   0 26.5160 3.87981   6
   8  11   0 27.5693 4.39199   8
   8  11   0 28.7509 4.05392   1
   8  11   0 36.4205 3.82003   5
   8  11   0 22.3770 4.06430   1
   8  11   0 25.4963 4.87758   4
   8  11   0 31.1198 4.28290   8
  -8  11   0 26.0110 4.24107   2
   8  11   0 38.0513 5.33899   6
  -8  11   0 20.9049 3.99563   1
   8  11   0 24.8030 4.71197   7
  -9 -11   0 2.97686 2.54512   8
   9 -11   0 5.40303 2.92712   8
  -9 -11   0 3.31466 1.93788   5
   9 -11   0 2.09008 2.63644   1
   9 -11   0 4.35827 3.97052   7
  -9 -11   0 5.48743 2.53121   1
  -9 -11   0 1.12054 1.61703   2
   9  11   0 0.29313 2.82060   8
  -9  11   0 1.42396 2.68392   1
  -9  11   0 3.72621 2.78061   8
  -9  11   0 7.11954 3.38054   5
   9  11   0 -1.1411 2.60743   1
   9  11   0 0.03374 3.53616   4
   9  11   0 2.08452 2.19275   5
  -9  11   0 2.25967 2.13054   6
  -9  11   0 4.81992 2.73905   1
   9  11   0 0.61166 2.71263   8
  -9  11   0 -0.6155 2.56789   2
  -9  11   0 -4.7994 2.57374   8
   9  11   0 1.14878 3.05126   6
   9  11   0 5.63669 3.38452   7
   9  11   0 1.82643 2.47343   1
  10 -11   0 96.3530 9.46638   1
  10 -11   0 69.5872 10.0689   7
 -10 -11   0 80.4342 8.23185   2
 -10 -11   0 80.7157 9.03638   8
  10 -11   0 86.3220 9.47661   8
 -10 -11   0 97.2099 8.96148   1
 -10 -11   0 88.2997 8.53990   5
 -10  11   0 67.4318 9.56741   5
  10  11   0 91.4321 9.11145   1
 -10  11   0 71.5416 9.20217   8
 -10  11   0 83.9070 9.28268   1
  10  11   0 92.6259 9.27024   7
 -10  11   0 78.8647 8.64196   6
 -10  11   0 85.2472 9.38257   2
 -10  11   0 75.3492 9.11928   8
  10  11   0 65.6903 9.33785   6
  10  11   0 94.3165 9.35456   8
  10  11   0 65.4700 9.63134   4
  10  11   0 97.8241 9.42102   8
  11 -11   0 21.5451 5.59375   7
 -11 -11   0 22.5141 4.18708   8
 -11 -11   0 28.7358 4.31339   1
  11 -11   0 25.2411 4.78579   8
 -11 -11   0 27.4855 3.98453   5
 -11 -11   0 27.4065 3.84383   2
  11 -11   0 19.5100 4.35366   1
  11  11   0 24.2989 4.76445   6
 -11  11   0 26.3903 4.65815   8
  11  11   0 24.9223 4.34517   1
  11  11   0 30.2242 4.77400   8
 -11  11   0 20.0251 4.42772   8
  11  11   0 24.8344 4.61438   8
 -11  11   0 23.0077 4.49559   1
 -11  11   0 29.3322 4.37259   6
 -11  11   0 28.4906 4.52880   2
  11  11   0 27.5336 4.79499   7
 -11  11   0 27.2354 5.37678   5
  11  11   0 34.0747 4.62302   5
  11  11   0 29.5410 5.63728   4
 -12 -11   0 4.64138 2.86574   8
 -12 -11   0 3.98730 1.86030   2
 -12 -11   0 2.13454 2.52253   5
 -12 -11   0 5.22878 2.67907   1
  12 -11   0 0.36193 3.01444   1
  12 -11   0 5.59193 4.41813   7
  12 -11   0 -1.3114 3.36058   8
  12  11   0 9.58416 3.50286   8
 -12  11   0 4.12938 2.45899   6
  12  11   0 1.24166 2.82905   1
 -12  11   0 4.22333 3.16151   5
  12  11   0 1.92384 2.98386   5
  12  11   0 3.54094 3.42343   6
 -12  11   0 4.08366 3.06699   2
  12  11   0 0.59961 3.92189   4
  12  11   0 3.95361 3.64231   7
 -12  11   0 2.02043 3.02024   1
  12  11   0 9.63364 3.73085   8
 -12  11   0 3.30427 3.24362   8
 -12  11   0 8.85201 3.40438   8
  13 -11   0 5.04248 3.36078   1
 -13 -11   0 6.87086 2.94527   8
  13 -11   0 4.45192 4.40625   7
 -13 -11   0 6.70176 2.73174   5
 -13 -11   0 4.25633 2.67611   2
 -13 -11   0 1.12892 2.79540   1
  13 -11   0 0.07114 3.35695   8
 -13  11   0 3.55611 2.80340   6
 -13  11   0 1.80814 3.12575   1
  13  11   0 5.38539 4.48759   4
 -13  11   0 4.36572 4.11145   5
  13  11   0 3.51970 3.51027   8
 -13  11   0 8.52518 3.46655   2
  13  11   0 2.98155 3.27754   7
  13  11   0 4.46183 3.44959   6
 -13  11   0 3.43813 3.19123   8
 -13  11   0 4.12819 3.62713   8
  13  11   0 4.65969 3.15103   1
  13  11   0 0.19895 3.51133   8
 -14 -11   0 30.9385 3.71889   2
 -14 -11   0 30.9520 4.62976   5
  14 -11   0 27.2664 6.13558   7
 -14 -11   0 27.5584 4.73531   8
 -14 -11   0 26.1186 4.57301   1
  14 -11   0 19.3967 4.80493   1
  14 -11   0 24.2779 5.18972   8
 -14  11   0 32.2653 5.26361   2
  14  11   0 25.5637 4.86639   1
  14  11   0 32.7773 5.45366   6
  14  11   0 27.7576 5.51980   4
 -14  11   0 28.8617 6.01429   5
 -14  11   0 22.9956 4.88626   1
  14  11   0 20.7824 4.89212   8
 -14  11   0 27.2619 4.35575   6
 -14  11   0 20.3214 4.72830   8
  14  11   0 30.3594 5.50907   7
  15 -11   0 13.1680 5.41681   7
 -15 -11   0 13.4494 3.78004   1
  15 -11   0 12.9584 4.30174   1
 -15 -11   0 17.7856 4.06600   5
 -15  11   0 22.9731 4.67077   8
 -15  11   0 15.4269 5.37727   5
  15  11   0 20.9494 4.67416   6
  15  11   0 9.38440 3.94100   1
  15  11   0 17.4043 4.80964   4
 -15  11   0 18.2326 4.44542   1
  15  11   0 13.4114 4.48318   8
 -15  11   0 17.5986 4.16123   2
 -15  11   0 19.5531 3.92570   6
  15  11   0 16.0613 4.55439   7
 -16 -11   0 5.64073 3.37580   5
 -16 -11   0 2.73463 3.08061   1
  16 -11   0 -0.7491 3.52193   1
  16 -11   0 5.38811 5.01772   7
 -16  11   0 6.32032 3.74205   2
  16  11   0 3.98123 4.28419   6
 -16  11   0 3.26358 3.59663   8
 -16  11   0 0.27734 3.50109   1
 -16  11   0 2.84296 2.53511   6
  16  11   0 -3.9800 3.13698   1
  16  11   0 8.02054 4.18248   4
  16  11   0 -0.8689 4.19039   7
 -16  11   0 2.80234 3.68276   5
  16  11   0 2.33716 3.74900   8
  17 -11   0 14.2821 5.59473   7
  17 -11   0 2.22137 3.90441   1
 -17 -11   0 11.7490 3.90469   5
 -17 -11   0 13.9156 3.71681   1
 -17  11   0 1.92157 3.65495   1
  17  11   0 4.34846 4.00276   8
 -17  11   0 16.0829 4.14568   2
  17  11   0 13.3314 4.55390   7
  17  11   0 14.4880 5.44729   4
  17  11   0 14.7468 4.31534   1
 -17  11   0 3.62967 3.96175   8
 -17  11   0 13.7906 5.66976   5
 -17  11   0 6.95274 3.35689   6
  18 -11   0 -7.8132 4.34631   7
 -18 -11   0 -1.3518 3.15220   5
 -18 -11   0 -0.7548 3.18571   1
  18 -11   0 -3.0429 3.61986   1
  18  11   0 2.89584 3.72751   7
 -18  11   0 0.81424 2.93466   6
  18  11   0 5.32726 3.78722   1
 -18  11   0 -5.3697 4.91473   5
 -18  11   0 4.40938 4.01481   1
 -18  11   0 10.9460 4.29086   8
  18  11   0 -0.2857 4.04281   8
 -18  11   0 4.39950 3.74646   2
  18  11   0 0.76986 5.10287   4
  19 -11   0 7.35568 5.61831   7
  19 -11   0 6.66670 4.42257   1
 -19 -11   0 10.1901 3.98323   5
 -19 -11   0 7.69044 3.79110   1
 -19  11   0 9.05573 4.40124   1
 -19  11   0 13.4178 4.77396   2
  19  11   0 14.1369 5.88890   4
 -19  11   0 11.8324 5.91837   5
  19  11   0 10.5539 4.32060   7
  19  11   0 5.79640 4.09667   1
   0 -12   0 1054.60 97.7301   1
   0 -12   0 1047.33 97.7907   8
   0 -12   0 1085.37 97.7611   1
   0 -12   0 1152.56 97.9089   6
   0 -12   0 1102.42 97.7331   2
   0 -12   0 1037.45 97.7580   8
   0 -12   0 1131.65 97.4031   5
   0  12   0 1168.69 97.8793   2
   0  12   0 1062.19 97.7560   1
   0  12   0 1012.12 97.8647   4
   0  12   0 1175.59 97.9458   8
   0  12   0 1121.99 97.8610   1
   0  12   0 1084.09 97.9044   6
   0  12   0 1109.74 98.1998   7
   0  12   0 1057.79 97.8360   8
   1 -12   0 10.7836 2.00409   5
  -1 -12   0 8.53045 1.69251   5
   1 -12   0 10.1299 2.55787   8
   1 -12   0 7.91565 2.57835   1
  -1 -12   0 11.3859 2.50872   1
  -1 -12   0 6.58497 2.59605   1
   1 -12   0 10.5103 2.46399   2
   1 -12   0 10.0416 2.74231   8
   1 -12   0 3.96347 2.28067   1
  -1 -12   0 8.56204 2.68803   6
  -1 -12   0 15.2264 2.79086   8
  -1 -12   0 10.2334 2.65572   8
  -1 -12   0 8.46657 2.31432   2
   1 -12   0 12.0459 2.81299   6
   1  12   0 5.83573 2.86805   6
   1  12   0 8.96620 2.54982   1
   1  12   0 9.00043 3.01370   4
  -1  12   0 8.08936 2.76606   8
  -1  12   0 11.8182 3.66600   7
   1  12   0 7.69178 2.51327   2
  -1  12   0 9.74622 2.85058   8
  -1  12   0 7.26972 2.71266   1
  -1  12   0 7.29057 2.82741   6
  -1  12   0 11.7020 2.69648   1
   1  12   0 10.3488 2.73269   8
  -1  12   0 12.8894 2.47050   2
   1  12   0 6.59434 2.60232   1
   1  12   0 6.55605 2.66932   8
  -2 -12   0 233.414 21.3892   2
   2 -12   0 221.355 21.4590   8
  -2 -12   0 245.286 21.5782   8
   2 -12   0 230.422 21.4395   1
  -2 -12   0 235.563 21.4951   1
  -2 -12   0 216.271 21.4480   6
   2 -12   0 226.463 21.4567   1
  -2 -12   0 235.021 21.5541   8
   2 -12   0 255.105 21.5545   2
  -2 -12   0 243.969 20.8561   5
   2 -12   0 246.451 21.2304   5
  -2 -12   0 223.047 21.4753   1
   2 -12   0 241.606 21.5832   6
   2 -12   0 231.646 21.5813   8
   2  12   0 220.149 21.5551   6
   2  12   0 215.434 21.5034   1
  -2  12   0 246.093 21.7271   8
  -2  12   0 225.388 21.6216   1
   2  12   0 230.218 21.4594   2
  -2  12   0 221.615 21.6045   8
   2  12   0 235.062 21.4949   1
   2  12   0 241.435 21.6437   8
  -2  12   0 244.377 21.5801   1
  -2  12   0 234.723 21.5245   6
   2  12   0 225.106 21.6839   4
  -2  12   0 191.185 21.8518   7
  -2  12   0 243.957 21.6575   2
   2  12   0 219.359 21.6061   8
  -3 -12   0 465.440 41.2383   1
  -3 -12   0 451.608 40.8373   1
   3 -12   0 453.169 40.8780   8
  -3 -12   0 466.179 40.9451   8
   3 -12   0 429.951 41.1175   1
   3 -12   0 456.328 40.8481   1
  -3 -12   0 464.661 40.9299   8
   3 -12   0 439.177 40.9461   8
  -3 -12   0 403.282 40.2317   5
  -3 -12   0 461.327 41.0601   4
   3 -12   0 437.444 40.8891   6
   3 -12   0 508.606 40.7975   5
  -3 -12   0 449.515 40.6828   2
  -3 -12   0 508.593 40.3140   5
  -3  12   0 427.761 40.9018   1
   3  12   0 477.905 41.1503   6
  -3  12   0 440.949 40.9468   6
  -3  12   0 466.669 40.9235   1
   3  12   0 485.705 40.9423   1
   3  12   0 404.720 40.7318   2
  -3  12   0 452.277 41.0252   8
   3  12   0 440.580 40.9787   8
  -3  12   0 400.169 40.9095   2
   3  12   0 424.526 40.4938   3
  -3  12   0 402.176 40.9056   8
   3  12   0 445.428 40.9240   1
   3  12   0 451.080 40.9573   8
  -3  12   0 483.350 40.9035   5
  -4 -12   0 6.96829 2.71818   1
   4 -12   0 5.89051 2.63334   8
   4 -12   0 10.2683 2.47971   8
  -4 -12   0 12.7337 3.02928   4
   4 -12   0 7.72872 2.47955   1
  -4 -12   0 5.85461 2.58279   8
  -4 -12   0 4.53928 2.46286   8
   4 -12   0 8.34307 2.51394   6
   4 -12   0 3.86190 2.38811   5
  -4 -12   0 7.21843 2.00857   2
  -4 -12   0 5.99195 1.33364   5
   4  12   0 3.87670 2.23231   2
  -4  12   0 5.71444 2.65778   8
  -4  12   0 8.68310 2.84168   5
   4  12   0 8.93014 1.85422   3
   4  12   0 6.88088 2.43220   1
  -4  12   0 3.19886 2.55444   2
  -4  12   0 8.32871 2.61447   6
  -4  12   0 1.05499 2.61678   8
   4  12   0 2.62004 2.86326   4
   4  12   0 4.86332 2.58787   1
   4  12   0 5.64545 2.63085   8
   4  12   0 5.01747 2.88237   6
  -4  12   0 5.05932 2.60035   1
  -4  12   0 6.18060 2.56098   1
   4  12   0 9.62057 2.79264   8
  -5 -12   0 20.1654 3.49479   8
   5 -12   0 18.7000 3.52205   8
  -5 -12   0 18.5563 2.80518   2
   5 -12   0 18.6348 3.35708   6
   5 -12   0 16.0326 3.30572   5
   5 -12   0 21.3940 5.07321   7
   5 -12   0 22.2434 3.42335   8
  -5 -12   0 23.4530 3.89811   8
   5 -12   0 14.6202 3.27939   1
  -5 -12   0 22.7924 3.56351   1
  -5 -12   0 23.2692 3.98247   4
  -5 -12   0 26.1893 2.60797   5
   5  12   0 19.7037 3.69529   8
   5  12   0 25.4059 3.92290   6
   5  12   0 21.5261 2.80871   3
   5  12   0 20.1632 3.46320   1
  -5  12   0 15.2550 3.45669   2
  -5  12   0 18.4416 3.72776   8
  -5  12   0 13.2213 3.35191   8
   5  12   0 20.4120 3.67238   1
   5  12   0 16.8686 3.87021   4
   5  12   0 17.2616 3.16534   2
   5  12   0 21.4725 3.63559   8
  -5  12   0 17.3960 3.48603   1
  -5  12   0 16.9210 3.43729   1
  -5  12   0 18.9477 3.61523   5
  -5  12   0 19.4530 3.65776   6
   6 -12   0 14.8141 3.56489   8
   6 -12   0 19.6842 3.61250   1
  -6 -12   0 18.7327 3.72902   8
   6 -12   0 20.4858 3.65969   5
  -6 -12   0 18.1427 2.92288   2
  -6 -12   0 26.1291 2.85619   5
  -6 -12   0 22.3043 3.58346   1
  -6 -12   0 14.5511 3.45894   8
   6 -12   0 14.4559 4.77468   7
   6 -12   0 22.4475 3.48662   8
   6  12   0 20.3875 3.87389   8
  -6  12   0 18.4067 3.58132   1
  -6  12   0 18.2320 3.81927   8
  -6  12   0 16.8715 3.57911   8
   6  12   0 21.1739 3.58468   1
   6  12   0 27.4414 4.45628   4
  -6  12   0 17.1028 3.28974   2
   6  12   0 25.1471 2.48277   3
   6  12   0 22.5587 3.71521   1
   6  12   0 20.8681 3.99949   6
   6  12   0 27.9956 3.94574   8
  -6  12   0 21.5319 3.65457   1
  -6  12   0 18.1963 3.39858   6
  -6  12   0 17.2028 3.87766   5
  -7 -12   0 1.34991 4.09161   8
   7 -12   0 -1.9408 2.55208   8
  -7 -12   0 2.25877 1.66151   2
   7 -12   0 -1.3342 3.93216   7
  -7 -12   0 -1.1819 2.40022   8
  -7 -12   0 -0.5844 2.52662   1
  -7 -12   0 0.99525 1.41830   5
   7 -12   0 -3.4486 2.32203   1
   7 -12   0 0.39690 2.21577   8
  -7  12   0 -0.8983 2.53889   8
   7  12   0 -5.9065 2.72540   6
   7  12   0 4.07196 2.75198   8
  -7  12   0 -0.0637 2.57575   1
  -7  12   0 -2.3823 2.69483   5
  -7  12   0 0.33145 2.81518   8
  -7  12   0 -0.1456 2.14870   6
  -7  12   0 2.23708 2.71561   2
  -7  12   0 -0.3141 2.33718   1
   7  12   0 5.86665 3.43577   4
   7  12   0 -0.7367 2.56532   8
   7  12   0 -1.3441 2.28614   1
  -8 -12   0 101.503 10.6769   5
  -8 -12   0 114.620 10.9155   2
   8 -12   0 115.171 11.6686   1
  -8 -12   0 110.253 11.3454   1
  -8 -12   0 125.715 11.6440   8
   8 -12   0 110.364 11.7437   8
   8 -12   0 115.501 12.7175   7
  -8  12   0 107.369 11.4630   1
  -8  12   0 121.390 11.8130   1
   8  12   0 132.911 11.6604   1
  -8  12   0 98.2562 11.6186   2
  -8  12   0 95.0088 11.5749   8
   8  12   0 137.065 11.6610   1
   8  12   0 100.310 11.7687   6
  -8  12   0 106.235 11.8509   5
   8  12   0 113.706 11.6825   8
   8  12   0 130.791 11.7676   8
   8  12   0 103.199 11.6442   4
  -8  12   0 116.319 11.4802   6
   8  12   0 126.327 12.0306   7
  -8  12   0 119.237 11.7605   8
  -9 -12   0 183.647 16.7718   1
   9 -12   0 194.932 17.2174   8
   9 -12   0 180.269 16.9723   1
  -9 -12   0 161.513 16.2599   5
  -9 -12   0 161.044 16.2987   2
  -9 -12   0 169.837 16.8387   8
   9 -12   0 156.922 17.9208   7
  -9  12   0 184.858 17.4798   5
   9  12   0 218.862 17.3186   8
   9  12   0 191.317 17.6442   4
   9  12   0 182.583 17.0668   7
   9  12   0 148.713 17.1387   6
   9  12   0 192.073 17.1285   8
  -9  12   0 168.116 16.8424   6
   9  12   0 181.368 16.9125   1
  -9  12   0 163.117 17.0995   2
  -9  12   0 167.800 17.1259   1
  -9  12   0 146.192 16.9244   8
   9  12   0 188.209 16.9801   1
  -9  12   0 167.039 17.0539   8
  10 -12   0 3.18231 4.14055   7
  10 -12   0 5.06352 3.22285   8
 -10 -12   0 0.05700 2.01926   5
 -10 -12   0 1.53063 2.58537   1
 -10 -12   0 -0.0827 1.65677   2
  10 -12   0 2.04200 2.78009   1
 -10 -12   0 0.75880 2.57190   8
 -10  12   0 3.28368 2.94438   8
 -10  12   0 -2.6703 2.68141   2
  10  12   0 -0.5208 2.28125   5
  10  12   0 -0.3064 2.74668   1
 -10  12   0 1.07348 2.75555   1
 -10  12   0 2.21542 3.46654   5
  10  12   0 -1.3424 2.84679   8
  10  12   0 -4.6982 2.93265   8
 -10  12   0 -0.0276 2.20332   6
  10  12   0 0.45283 3.29518   6
  10  12   0 0.89161 3.72109   4
 -10  12   0 -0.8946 2.95688   8
  10  12   0 4.55691 3.62208   7
  11 -12   0 21.8160 4.54515   8
  11 -12   0 27.9396 5.90509   7
 -11 -12   0 13.4970 3.77578   1
  11 -12   0 23.6717 4.30589   1
 -11 -12   0 16.9050 3.38922   5
 -11 -12   0 20.2367 3.02533   2
 -11 -12   0 18.6850 3.97399   8
  11  12   0 25.1833 3.94889   5
  11  12   0 15.7750 4.02317   1
 -11  12   0 26.7263 4.06686   6
 -11  12   0 20.7657 4.24556   1
  11  12   0 22.4668 5.25135   4
 -11  12   0 27.1898 5.28285   5
  11  12   0 20.8381 4.28026   8
 -11  12   0 23.3622 4.45661   8
  11  12   0 25.4043 4.57631   7
 -11  12   0 24.4634 4.50466   8
  11  12   0 14.0789 4.22773   8
  11  12   0 29.3087 4.53870   6
 -11  12   0 16.9442 4.05945   2
 -12 -12   0 75.6184 7.57403   2
 -12 -12   0 77.8074 8.06866   5
  12 -12   0 74.8767 9.18241   1
  12 -12   0 69.5585 9.71578   8
 -12 -12   0 70.9123 8.70673   8
 -12 -12   0 65.4404 8.70218   1
  12 -12   0 60.9690 10.1017   7
  12  12   0 69.4311 9.08587   8
  12  12   0 70.9098 9.77819   4
 -12  12   0 74.6092 8.54542   6
  12  12   0 64.2021 8.65132   1
 -12  12   0 78.1904 9.11540   2
  12  12   0 94.5990 9.60499   7
 -12  12   0 77.7226 9.11177   1
 -12  12   0 90.3496 9.40865   8
 -12  12   0 55.7530 8.83394   8
 -12  12   0 74.8017 9.79998   5
  12  12   0 87.2689 9.28219   8
  12  12   0 69.9499 9.14092   6
  13 -12   0 22.0184 5.73191   7
  13 -12   0 17.4400 4.71995   8
 -13 -12   0 19.4013 3.94811   8
 -13 -12   0 27.6669 4.01704   5
 -13 -12   0 20.5044 4.03111   1
  13 -12   0 23.4677 4.60441   1
 -13  12   0 23.2559 4.89428   5
  13  12   0 21.6239 4.76999   6
 -13  12   0 25.0831 4.57813   2
  13  12   0 17.7404 5.30168   4
 -13  12   0 11.9759 4.05168   1
  13  12   0 14.0386 4.02386   1
 -13  12   0 20.1481 4.55375   8
 -13  12   0 21.4248 3.70087   6
  13  12   0 16.8350 4.46423   8
  13  12   0 20.7899 4.72685   7
 -14 -12   0 127.815 11.7136   5
 -14 -12   0 115.539 12.1875   8
  14 -12   0 97.1069 13.2129   7
  14 -12   0 118.909 12.5114   8
  14 -12   0 112.746 12.3151   1
 -14 -12   0 95.2669 11.8379   1
  14  12   0 121.136 12.4702   7
 -14  12   0 108.017 11.7136   6
  14  12   0 106.680 12.3810   6
  14  12   0 107.901 12.4428   8
 -14  12   0 125.817 13.3953   5
  14  12   0 101.225 12.1015   1
 -14  12   0 128.784 12.6047   1
 -14  12   0 125.064 12.4965   2
 -14  12   0 124.673 12.6462   8
  14  12   0 98.7643 12.9577   4
  15 -12   0 35.2357 5.90234   1
  15 -12   0 32.2832 6.89529   7
 -15 -12   0 24.9344 5.10015   1
 -15 -12   0 40.4397 5.86511   5
  15  12   0 27.5050 5.64487   8
 -15  12   0 54.8635 7.46464   8
 -15  12   0 40.3154 5.39890   6
  15  12   0 28.0585 5.44025   1
  15  12   0 33.9775 5.61516   7
 -15  12   0 32.0203 5.64063   1
  15  12   0 39.3089 7.16149   4
 -15  12   0 35.2712 5.62047   2
  15  12   0 19.4844 5.47594   6
 -15  12   0 40.1715 7.06760   5
  16 -12   0 76.2119 12.1863   7
 -16 -12   0 105.033 10.7763   5
 -16 -12   0 91.2489 10.8389   1
  16 -12   0 103.185 11.4711   1
 -16  12   0 99.3427 11.4889   1
 -16  12   0 120.540 12.9968   5
  16  12   0 102.765 12.4231   4
  16  12   0 94.6007 11.6410   7
  16  12   0 103.404 11.5955   6
  16  12   0 96.8647 11.1647   1
 -16  12   0 103.593 11.8133   2
  16  12   0 81.8984 11.3648   8
 -16  12   0 94.8534 12.1284   8
 -17 -12   0 21.1949 4.70153   5
  17 -12   0 19.1662 6.00624   7
 -17 -12   0 16.4364 3.97256   1
  17 -12   0 16.7965 4.96596   1
  17  12   0 9.62728 4.22579   1
  17  12   0 13.7114 5.08748   7
 -17  12   0 23.5910 5.28078   2
  17  12   0 27.9493 6.51293   4
 -17  12   0 11.9913 3.47473   6
 -17  12   0 19.4205 4.94792   8
  17  12   0 11.0297 4.58837   8
 -17  12   0 13.1458 4.49970   1
 -17  12   0 17.2311 5.98694   5
  18 -12   0 1.37018 5.12066   7
  18 -12   0 7.71916 4.42710   1
 -18 -12   0 4.80678 3.35636   1
 -18  12   0 7.60313 4.43061   2
  18  12   0 0.75429 4.24160   7
 -18  12   0 4.91402 4.11386   1
 -18  12   0 2.45495 3.97829   8
  18  12   0 11.1774 5.44220   4
  18  12   0 2.97488 3.71567   1
  18  12   0 0.10457 4.13323   8
 -18  12   0 1.01558 4.09786   5
 -19 -12   0 10.2943 3.86836   1
  19 -12   0 10.7253 5.98583   7
  19 -12   0 5.54952 4.53643   1
 -19  12   0 12.6978 4.23812   2
  19  12   0 10.1443 5.72622   4
 -19  12   0 15.0095 4.72095   1
 -19  12   0 15.5382 6.46972   5
  19  12   0 -0.7768 3.89297   1
   0 -13   0 0.28178 1.42352   5
   0 -13   0 0.72376 2.28774   8
   0 -13   0 -1.0762 2.01857   1
   0 -13   0 3.34387 2.55940   8
   0 -13   0 -2.1528 1.86917   2
   0  13   0 1.34478 2.08931   1
   0  13   0 1.78102 3.21319   7
   0  13   0 -1.9112 2.32606   8
   0  13   0 -2.5559 2.16353   8
   0  13   0 0.27400 1.91199   6
   0  13   0 -4.0338 2.10012   2
   0  13   0 -0.2122 2.56158   4
   0  13   0 1.62250 2.24677   1
  -1 -13   0 46.4280 5.99650   8
   1 -13   0 46.2453 6.05788   8
  -1 -13   0 55.1938 6.01305   8
  -1 -13   0 60.1741 5.82786   2
   1 -13   0 42.2475 5.86387   1
   1 -13   0 47.0185 5.14820   5
   1 -13   0 52.1128 5.92582   8
  -1 -13   0 49.3933 5.94119   1
   1 -13   0 56.1371 6.74890   6
  -1 -13   0 50.5995 4.89791   5
   1  13   0 36.7738 6.05596   8
  -1  13   0 41.0355 5.68594   6
  -1  13   0 52.1477 6.26955   8
  -1  13   0 49.2311 6.24009   2
  -1  13   0 40.9827 5.98623   1
   1  13   0 49.8149 6.35790   6
   1  13   0 51.9642 6.06122   2
  -1  13   0 45.0158 5.83629   1
   1  13   0 46.8530 6.19272   1
   1  13   0 50.4652 6.17928   8
   1  13   0 55.5334 6.07531   1
  -1  13   0 41.7018 6.11814   8
   1  13   0 44.5894 6.11620   4
  -2 -13   0 233.746 21.0876   2
   2 -13   0 257.166 21.0121   5
   2 -13   0 219.822 21.2536   1
  -2 -13   0 221.378 21.2559   8
   2 -13   0 208.671 21.2623   8
  -2 -13   0 228.724 21.2379   1
  -2 -13   0 234.099 20.5410   5
   2 -13   0 213.065 21.1867   8
   2 -13   0 218.245 21.3369   6
  -2 -13   0 227.065 21.2958   8
  -2  13   0 223.171 21.4302   8
  -2  13   0 216.544 21.2244   6
   2  13   0 231.124 21.5361   6
  -2  13   0 224.130 21.3630   2
  -2  13   0 225.770 21.4288   8
   2  13   0 217.465 21.4155   4
   2  13   0 244.523 21.4187   8
   2  13   0 247.326 21.3076   1
   2  13   0 227.414 21.3269   2
  -2  13   0 221.390 21.3299   1
   2  13   0 229.277 21.4049   8
  -2  13   0 249.803 21.3735   1
   2  13   0 216.678 21.2423   1
  -3 -13   0 213.382 17.3017   5
   3 -13   0 167.023 17.6722   5
  -3 -13   0 175.652 17.2111   5
  -3 -13   0 196.912 18.0966   8
   3 -13   0 197.801 18.1741   8
  -3 -13   0 190.617 18.0573   1
  -3 -13   0 206.662 18.1515   8
   3 -13   0 183.985 17.9831   1
   3 -13   0 175.251 17.9686   8
  -3 -13   0 177.401 17.7434   2
   3 -13   0 204.723 18.2013   6
   3  13   0 192.534 18.3577   6
  -3  13   0 188.425 18.2117   8
   3  13   0 226.313 18.3318   8
   3  13   0 184.961 18.0656   1
  -3  13   0 190.861 18.1560   1
   3  13   0 216.313 18.1591   1
  -3  13   0 191.473 18.1796   6
  -3  13   0 195.496 18.2252   2
  -3  13   0 198.054 18.2753   8
   3  13   0 205.220 18.3464   4
   3  13   0 187.630 18.1787   8
  -3  13   0 193.648 18.0583   1
   3  13   0 150.406 17.7981   2
  -3  13   0 200.801 18.0183   5
   4 -13   0 -1.5562 2.06898   1
  -4 -13   0 1.32222 2.59200   4
   4 -13   0 2.08386 2.36559   6
   4 -13   0 2.62926 2.24430   5
   4 -13   0 -0.4003 2.10433   8
  -4 -13   0 -0.9285 1.51455   2
  -4 -13   0 -2.6527 2.54762   8
  -4 -13   0 -1.6007 2.28826   1
   4 -13   0 0.67459 2.49799   8
  -4 -13   0 0.70242 1.04525   5
  -4 -13   0 -0.0397 2.15752   8
  -4  13   0 0.88145 2.44016   2
   4  13   0 -4.0170 2.55989   4
  -4  13   0 -0.4597 2.66785   5
   4  13   0 1.13028 1.64730   3
  -4  13   0 0.10924 2.32266   8
  -4  13   0 1.46406 2.38911   1
   4  13   0 -2.6176 2.09286   2
  -4  13   0 0.74077 2.64359   8
   4  13   0 2.30660 2.61656   8
  -4  13   0 -2.4236 2.28243   6
   4  13   0 0.55514 2.22826   1
  -4  13   0 -0.7986 2.30810   1
   4  13   0 1.20244 2.75885   6
   4  13   0 -1.0136 2.43183   1
   4  13   0 0.29408 2.31044   8
  -5 -13   0 11.2672 2.88942   8
  -5 -13   0 14.1919 1.97170   5
  -5 -13   0 13.0165 3.06564   8
   5 -13   0 10.5432 2.76303   8
  -5 -13   0 9.16595 3.03619   1
  -5 -13   0 10.8691 2.23373   2
   5 -13   0 12.1265 3.01313   1
   5 -13   0 12.6827 3.06530   8
   5 -13   0 8.59323 2.65149   5
   5  13   0 16.2477 3.30405   1
  -5  13   0 10.8113 2.66624   2
   5  13   0 14.8119 3.01068   1
  -5  13   0 9.52106 2.85756   6
  -5  13   0 7.99927 2.84237   1
  -5  13   0 8.72447 3.00059   8
   5  13   0 5.87625 2.89676   8
   5  13   0 10.4545 2.46975   2
   5  13   0 14.5411 3.24350   8
   5  13   0 9.45382 3.44827   4
   5  13   0 10.6919 3.37080   6
  -5  13   0 3.70982 2.88599   8
  -5  13   0 8.62320 2.93379   1
  -5  13   0 8.59347 3.25319   5
   5  13   0 13.2177 2.02860   3
  -6 -13   0 55.0893 6.99603   1
  -6 -13   0 67.7302 5.83500   5
   6 -13   0 60.4303 7.11672   1
   6 -13   0 50.9555 7.92888   7
   6 -13   0 51.4163 7.20188   8
  -6 -13   0 54.6134 6.42601   2
  -6 -13   0 68.3867 7.19473   8
   6 -13   0 52.0625 7.27284   5
   6  13   0 49.2441 7.40122   4
  -6  13   0 61.9510 7.38353   8
  -6  13   0 58.4455 7.21551   5
  -6  13   0 66.5492 7.31786   1
  -6  13   0 57.1036 7.31895   2
   6  13   0 65.9163 7.43997   8
   6  13   0 58.8729 5.74516   3
   6  13   0 59.8430 7.15533   1
  -6  13   0 52.2448 6.89476   6
  -6  13   0 60.5645 7.54703   1
  -6  13   0 66.5034 7.54981   8
   6  13   0 65.0115 6.99770   1
   6  13   0 57.8721 7.21320   8
   6  13   0 58.4803 7.47928   6
  -7 -13   0 133.683 12.9082   1
  -7 -13   0 143.716 12.9550   8
   7 -13   0 133.210 12.8816   1
  -7 -13   0 112.076 12.2377   2
  -7 -13   0 117.971 11.9393   5
   7 -13   0 139.493 13.1250   8
   7 -13   0 109.684 13.9664   7
   7  13   0 147.471 12.9610   1
  -7  13   0 145.151 13.1074   1
  -7  13   0 134.149 13.1145   1
   7  13   0 153.197 13.1889   8
  -7  13   0 143.936 13.2770   8
   7  13   0 142.182 13.1519   8
   7  13   0 118.849 13.2005   6
   7  13   0 116.598 12.9340   4
  -7  13   0 128.262 12.7495   6
  -7  13   0 119.218 13.0609   5
  -7  13   0 120.377 13.0707   8
   7  13   0 148.900 13.0035   1
  -7  13   0 112.728 12.9879   2
   8 -13   0 -1.7729 4.17116   7
  -8 -13   0 0.70277 2.57858   1
  -8 -13   0 -3.9937 2.50396   8
   8 -13   0 1.92560 2.92705   8
  -8 -13   0 0.93573 1.59241   5
   8 -13   0 2.71175 2.78961   1
  -8 -13   0 1.68849 1.75804   2
  -8  13   0 1.05003 2.82298   2
   8  13   0 1.64095 2.98168   8
   8  13   0 -0.3994 3.12231   6
  -8  13   0 -0.9417 3.01269   8
   8  13   0 -0.3671 2.79501   1
  -8  13   0 0.01615 3.02118   5
  -8  13   0 -1.1604 2.62416   6
  -8  13   0 -3.0571 2.41748   1
   8  13   0 -1.1007 2.41734   1
  -8  13   0 -3.9132 2.58082   1
  -8  13   0 0.29118 2.80793   8
   8  13   0 -0.9685 3.43845   4
  -9 -13   0 -0.1035 1.74804   5
  -9 -13   0 -2.1178 2.50476   8
   9 -13   0 -7.1099 3.93210   7
   9 -13   0 3.02357 2.86888   1
   9 -13   0 0.64095 3.44572   8
  -9 -13   0 0.53783 1.71208   2
  -9 -13   0 4.22974 2.72146   1
   9  13   0 -1.5433 2.79318   8
  -9  13   0 -3.0443 3.14463   5
   9  13   0 4.49708 3.35283   6
   9  13   0 -1.8679 3.12697   8
  -9  13   0 -1.9530 2.48261   6
  -9  13   0 -1.8323 2.74941   1
  -9  13   0 -0.5680 2.92486   8
  -9  13   0 0.73200 2.78033   2
   9  13   0 2.26847 2.90691   1
   9  13   0 0.44319 3.62260   7
   9  13   0 1.05131 3.64579   4
  -9  13   0 0.65774 2.87904   8
  10 -13   0 7.31441 3.34629   1
 -10 -13   0 10.8989 3.28313   8
  10 -13   0 12.9787 3.79822   8
 -10 -13   0 6.34167 2.38062   5
  10 -13   0 12.3579 5.07413   7
 -10 -13   0 9.51368 2.24769   2
 -10 -13   0 10.2486 3.19385   1
 -10  13   0 13.6575 3.88718   8
  10  13   0 17.5446 4.76709   4
 -10  13   0 8.84547 3.49692   2
  10  13   0 12.8037 3.92188   7
 -10  13   0 8.53721 2.92638   6
  10  13   0 11.3285 3.50684   1
 -10  13   0 8.40783 3.41173   1
 -10  13   0 15.5603 4.25155   5
  10  13   0 6.86489 3.94716   6
 -10  13   0 13.0575 3.64484   8
  10  13   0 11.7907 2.78305   5
  10  13   0 12.6819 3.85661   8
  10  13   0 4.18041 3.41105   8
 -11 -13   0 45.9671 6.35997   1
  11 -13   0 41.7925 7.47139   7
 -11 -13   0 41.4680 5.14606   5
 -11 -13   0 34.8636 4.95049   2
 -11 -13   0 27.6171 5.34888   8
  11 -13   0 42.3949 6.06075   8
  11 -13   0 47.7924 6.55033   1
  11  13   0 34.3438 5.61799   1
 -11  13   0 50.3666 6.24298   6
 -11  13   0 38.2963 6.61877   5
 -11  13   0 38.9233 5.99209   8
 -11  13   0 37.2990 5.86667   8
  11  13   0 35.4684 5.89169   8
  11  13   0 45.8499 6.76933   8
  11  13   0 53.5189 5.58301   5
 -11  13   0 45.0148 6.73411   2
  11  13   0 41.9002 6.84668   4
 -11  13   0 54.6776 6.93813   1
  11  13   0 41.2825 6.53698   7
  11  13   0 24.3063 5.85969   6
  12 -13   0 60.3855 9.74559   7
 -12 -13   0 53.6594 7.75784   8
  12 -13   0 52.3558 7.94221   1
 -12 -13   0 65.4564 7.15801   5
 -12 -13   0 64.8144 7.26515   2
 -12 -13   0 74.5953 8.08014   1
  12 -13   0 50.8748 8.26932   8
  12  13   0 56.8357 9.14445   4
  12  13   0 57.3897 7.87767   1
 -12  13   0 59.8745 9.02179   5
  12  13   0 64.3712 8.80374   7
 -12  13   0 51.0551 8.04471   8
 -12  13   0 71.0929 7.48934   6
  12  13   0 69.1039 8.58964   6
 -12  13   0 58.5283 8.26433   1
 -12  13   0 65.0482 8.35816   2
  12  13   0 70.5355 8.43044   8
 -12  13   0 82.0337 8.72326   8
  13 -13   0 -1.0554 3.47128   8
  13 -13   0 -1.5155 3.24422   1
 -13 -13   0 -1.6714 2.77906   8
  13 -13   0 -0.6072 4.77927   7
 -13 -13   0 -2.1705 2.89603   1
 -13 -13   0 0.00063 2.28114   5
 -13  13   0 2.55761 4.25930   5
  13  13   0 -4.7286 2.93394   1
 -13  13   0 -0.2564 2.78208   6
 -13  13   0 1.61509 3.19424   1
  13  13   0 -0.1970 3.55441   6
  13  13   0 -2.1457 4.09882   7
  13  13   0 0.20486 3.59214   8
  13  13   0 -1.0758 4.28212   4
 -13  13   0 4.25652 3.49881   8
 -13  13   0 2.08655 3.21382   2
 -14 -13   0 44.1164 7.52014   1
 -14 -13   0 62.7867 7.08930   5
  14 -13   0 56.5348 8.83361   7
  14 -13   0 55.2637 8.13597   1
  14  13   0 52.7975 7.44102   1
 -14  13   0 58.3507 7.78754   1
  14  13   0 52.5108 7.58998   8
 -14  13   0 71.8535 8.40321   5
  14  13   0 59.2794 9.05957   4
 -14  13   0 65.0467 8.37962   2
  14  13   0 52.3705 8.21062   6
 -14  13   0 68.2290 7.30420   6
 -14  13   0 52.8255 7.71154   8
  14  13   0 57.4493 8.52926   7
 -15 -13   0 23.4049 4.38242   1
 -15 -13   0 24.0943 4.07679   5
  15 -13   0 13.1310 5.78335   7
  15 -13   0 14.7922 4.69094   1
 -15  13   0 19.3307 4.88514   1
 -15  13   0 13.4171 4.62974   2
  15  13   0 20.0014 4.60363   1
 -15  13   0 25.3672 6.01849   5
  15  13   0 16.6221 4.81505   8
  15  13   0 13.6769 4.74746   6
  15  13   0 16.6838 5.25502   7
  15  13   0 26.9804 5.45961   4
 -15  13   0 18.2568 4.84289   8
 -15  13   0 14.9567 3.84429   6
 -16 -13   0 -0.5105 3.01321   5
  16 -13   0 -1.9586 5.05781   7
 -16 -13   0 1.71414 3.20801   1
  16 -13   0 6.09817 4.04275   1
 -16  13   0 7.42217 4.08479   5
  16  13   0 4.53776 4.06253   8
 -16  13   0 -1.0018 3.55215   1
 -16  13   0 8.73282 3.96909   2
  16  13   0 1.14144 3.49956   1
  16  13   0 1.39712 3.60628   4
 -16  13   0 3.08109 3.26543   6
  16  13   0 3.88327 4.62780   6
  16  13   0 9.04152 4.38562   7
 -16  13   0 3.26845 3.83937   8
  17 -13   0 23.6550 6.76049   7
 -17 -13   0 17.8847 4.48019   1
  17 -13   0 27.3252 5.62857   1
 -17  13   0 25.9452 5.13139   2
  17  13   0 21.4626 5.46954   6
 -17  13   0 23.7444 6.65770   5
 -17  13   0 17.7046 5.27920   8
 -17  13   0 27.7563 4.54324   6
  17  13   0 26.4376 5.52886   7
 -17  13   0 22.6339 5.25274   1
  17  13   0 25.2883 5.65482   4
  17  13   0 12.0194 4.98530   8
  17  13   0 19.1116 5.07101   1
  18 -13   0 17.6924 5.34692   1
 -18 -13   0 21.4785 4.87519   1
  18 -13   0 20.0761 6.71456   7
 -18  13   0 35.1307 9.22014   8
 -18  13   0 30.1749 5.56203   2
  18  13   0 30.3658 6.99568   4
 -18  13   0 38.5676 7.59918   5
 -18  13   0 35.6470 6.03886   1
  18  13   0 27.0074 6.12568   7
  18  13   0 27.4096 5.94633   8
  18  13   0 20.6926 5.30053   1
  19 -13   0 1.04872 5.33374   7
 -19 -13   0 1.08404 3.37081   1
 -19  13   0 12.2970 6.10107   5
 -19  13   0 12.7987 4.30828   2
  19  13   0 -1.5535 3.94879   1
 -19  13   0 5.60277 4.31931   1
  19  13   0 16.5992 6.01662   4
   0 -14   0 1.81660 1.59248   5
   0 -14   0 2.58083 2.23312   8
   0 -14   0 4.14280 2.50026   8
   0 -14   0 1.39112 2.30753   1
   0  14   0 -2.2433 2.40424   2
   0  14   0 1.64292 2.29812   1
   0  14   0 1.32451 2.36038   1
   0  14   0 -0.4238 3.09355   4
   0  14   0 4.87822 2.64277   8
   0  14   0 3.27961 2.45292   8
   0  14   0 -1.6515 2.65578   6
   1 -14   0 -0.0512 1.73344   5
   1 -14   0 2.96458 2.45002   8
   1 -14   0 0.17871 2.17962   8
  -1 -14   0 -0.1871 1.31479   5
  -1 -14   0 5.57148 2.38082   8
  -1 -14   0 0.73862 2.33326   8
  -1 -14   0 -0.5079 2.13563   1
   1 -14   0 0.64329 2.23032   1
  -1  14   0 0.62602 2.47139   1
  -1  14   0 0.43029 2.38291   8
  -1  14   0 0.28521 3.05295   4
   1  14   0 -0.0207 2.14102   6
  -1  14   0 -1.0453 2.43464   2
  -1  14   0 -1.2396 2.71205   6
   1  14   0 1.90072 2.23446   1
   1  14   0 0.03134 2.37362   1
   1  14   0 1.79730 2.47471   2
   1  14   0 1.44503 2.72534   4
  -1  14   0 -1.2981 2.35268   8
   1  14   0 -3.9555 2.25507   8
   1  14   0 1.17335 2.32102   8
  -1  14   0 -0.0712 2.08764   1
  -2 -14   0 3.79084 2.59628   8
   2 -14   0 4.02889 2.49455   8
  -2 -14   0 5.40874 2.42754   8
   2 -14   0 0.90232 2.24193   1
  -2 -14   0 4.26002 1.24097   5
   2 -14   0 1.69195 2.27200   8
   2 -14   0 6.27308 2.10297   5
  -2 -14   0 2.56487 2.10607   2
  -2 -14   0 1.36650 2.43210   1
   2  14   0 4.81756 2.72960   8
   2  14   0 4.20058 2.47770   8
  -2  14   0 4.73212 2.84185   2
  -2  14   0 2.50371 2.62233   8
  -2  14   0 2.01930 2.68854   6
   2  14   0 1.93648 2.95072   6
   2  14   0 4.52960 2.45992   1
   2  14   0 -1.5477 2.73323   4
   2  14   0 2.82829 2.29765   1
  -2  14   0 3.56038 2.58604   8
   2  14   0 0.66061 2.31656   2
  -2  14   0 2.12168 2.52642   1
  -2  14   0 5.82927 2.63716   1
  -3 -14   0 14.9653 3.33324   8
   3 -14   0 14.4775 3.04647   1
   3 -14   0 15.7865 3.22646   8
  -3 -14   0 12.8697 1.87988   5
  -3 -14   0 8.38637 2.41135   2
  -3 -14   0 12.5217 1.90796   5
   3 -14   0 15.7548 2.82617   5
  -3 -14   0 13.3877 3.07404   1
   3 -14   0 13.0527 2.94491   8
  -3 -14   0 16.8508 3.38652   8
   3  14   0 14.9532 3.39277   8
  -3  14   0 13.7865 3.42113   6
   3  14   0 14.3288 3.27026   1
   3  14   0 11.5475 2.98057   1
  -3  14   0 12.9779 3.31369   8
   3  14   0 8.87769 3.50082   6
   3  14   0 14.5436 3.21093   8
   3  14   0 11.5010 3.48144   4
  -3  14   0 13.4476 3.11171   1
  -3  14   0 15.1386 3.39628   8
  -3  14   0 7.25203 3.13275   2
   3  14   0 8.96163 2.81691   2
   3  14   0 15.3265 2.47807   3
  -3  14   0 15.9137 3.30085   1
  -4 -14   0 7.64947 2.85707   8
  -4 -14   0 9.13412 2.34916   2
  -4 -14   0 8.24177 1.36269   5
  -4 -14   0 6.10643 2.69694   1
  -4 -14   0 7.15180 1.28458   5
   4 -14   0 10.1757 2.71410   5
   4 -14   0 3.72530 2.62880   1
   4 -14   0 5.82681 2.75406   8
   4  14   0 7.82963 3.06733   8
  -4  14   0 4.15627 2.88905   8
   4  14   0 7.14175 2.82514   8
  -4  14   0 7.65389 2.90190   1
   4  14   0 6.31415 2.71057   6
   4  14   0 2.78773 1.93671   3
   4  14   0 10.5459 2.80609   1
  -4  14   0 6.43368 3.06930   5
  -4  14   0 5.63047 2.43550   2
   4  14   0 8.66310 2.90220   1
  -4  14   0 5.71914 2.88411   6
  -4  14   0 5.36950 2.78185   1
   4  14   0 8.13317 3.33359   4
  -4  14   0 3.09529 2.90684   8
   4  14   0 5.39544 2.44712   2
   5 -14   0 1.62940 2.75829   8
  -5 -14   0 1.48949 2.64346   1
  -5 -14   0 3.59072 1.08617   5
  -5 -14   0 2.46379 2.70631   8
  -5 -14   0 -0.6400 1.59654   2
   5 -14   0 -0.4431 2.50885   1
   5 -14   0 2.90963 2.70754   5
  -5  14   0 0.35198 2.46526   1
  -5  14   0 5.54585 2.86283   1
  -5  14   0 3.60353 2.58441   6
   5  14   0 -2.7870 2.26529   1
  -5  14   0 0.37382 2.77928   8
  -5  14   0 0.76710 2.98197   5
   5  14   0 2.41509 2.18907   2
   5  14   0 1.05827 2.80615   8
   5  14   0 0.41200 3.11751   4
  -5  14   0 -1.0625 2.49871   2
  -5  14   0 3.64006 2.79501   8
   5  14   0 -0.8928 1.60926   3
   5  14   0 4.21162 2.80016   1
   5  14   0 4.91161 2.76763   8
   5  14   0 -0.5422 2.88616   6
  -6 -14   0 0.46014 1.19817   5
  -6 -14   0 -1.8595 2.61026   1
   6 -14   0 -0.0717 2.54681   1
   6 -14   0 -0.2364 2.71647   8
  -6 -14   0 3.50859 1.93459   2
  -6 -14   0 -2.4956 2.66588   8
   6  14   0 0.01295 2.67094   1
   6  14   0 -1.2233 2.36698   1
  -6  14   0 1.55737 2.96986   8
   6  14   0 6.29346 3.27799   4
  -6  14   0 2.64636 2.77934   2
  -6  14   0 -0.2916 2.55180   1
  -6  14   0 -3.8922 2.50729   1
  -6  14   0 4.80847 2.71366   6
   6  14   0 2.08747 2.69111   8
   6  14   0 2.30017 3.01104   8
  -6  14   0 0.04116 3.15046   5
  -6  14   0 0.99983 2.66957   8
   6  14   0 0.26897 2.85266   6
   6  14   0 -1.0495 1.23110   3
  -7 -14   0 249.060 22.6883   1
  -7 -14   0 252.939 22.3413   2
   7 -14   0 259.652 24.0307   7
   7 -14   0 242.796 22.9286   8
   7 -14   0 253.453 22.7601   1
  -7 -14   0 208.045 21.8645   5
  -7 -14   0 249.430 22.8244   8
   7  14   0 279.175 23.0522   8
   7  14   0 253.298 23.3001   4
   7  14   0 259.951 23.0240   8
  -7  14   0 275.019 23.2485   8
  -7  14   0 255.792 23.0792   8
  -7  14   0 233.393 22.8297   6
  -7  14   0 192.517 22.7840   2
   7  14   0 289.201 23.0085   1
  -7  14   0 204.669 22.8265   5
   7  14   0 216.111 23.0082   6
   7  14   0 247.040 22.8388   1
  -7  14   0 245.993 23.0209   1
  -8 -14   0 4.68311 1.98462   2
  -8 -14   0 2.59653 1.47693   5
  -8 -14   0 2.51400 2.85966   1
  -8 -14   0 0.69725 2.84228   8
   8 -14   0 3.10387 3.01502   8
   8 -14   0 -0.6554 2.74852   1
   8 -14   0 5.55987 4.79733   7
  -8  14   0 2.58094 2.96948   2
  -8  14   0 5.23031 3.07846   8
  -8  14   0 3.73990 2.99193   1
   8  14   0 -0.1680 3.15771   6
   8  14   0 -1.0987 2.77911   8
  -8  14   0 1.65719 3.16612   8
   8  14   0 5.75426 3.80925   4
  -8  14   0 0.67269 2.40835   6
  -8  14   0 5.84025 3.41880   5
   9 -14   0 4.77449 5.06267   7
  -9 -14   0 10.5276 3.29401   8
   9 -14   0 4.01463 3.43582   8
  -9 -14   0 12.9433 3.37912   1
  -9 -14   0 14.3987 2.25835   5
  -9 -14   0 10.7802 2.39003   2
   9 -14   0 15.6398 3.60331   1
   9  14   0 6.91236 3.42692   1
  -9  14   0 7.89227 3.52834   8
  -9  14   0 5.66702 3.81532   5
   9  14   0 5.30788 3.24299   8
   9  14   0 8.22207 3.20328   6
   9  14   0 7.46890 4.36440   4
  -9  14   0 12.5505 3.72058   8
  -9  14   0 7.21906 3.35617   1
   9  14   0 10.7506 3.84160   7
   9  14   0 15.2898 4.01071   8
  -9  14   0 10.4114 3.58519   2
  -9  14   0 13.3648 3.47888   6
 -10 -14   0 12.9770 2.49292   2
  10 -14   0 13.0947 4.08949   8
  10 -14   0 8.24258 5.40778   7
 -10 -14   0 8.60222 3.46472   8
 -10 -14   0 13.5673 2.57045   5
 -10 -14   0 11.3164 3.31572   1
  10 -14   0 8.71138 3.71186   1
  10  14   0 12.0454 3.81061   8
  10  14   0 12.5198 3.63429   6
 -10  14   0 13.0337 3.81216   2
  10  14   0 9.06937 4.67591   4
  10  14   0 14.6216 4.17409   8
  10  14   0 12.5180 4.71788   7
 -10  14   0 13.5435 3.41338   6
 -10  14   0 16.8364 4.34767   8
 -10  14   0 11.9151 3.77372   1
  10  14   0 13.8790 3.64963   1
 -10  14   0 16.1075 4.02352   8
 -10  14   0 11.7172 4.40024   5
 -11 -14   0 8.15807 3.44782   1
  11 -14   0 20.1389 4.31302   1
  11 -14   0 13.0655 4.26401   8
 -11 -14   0 17.0469 3.00625   5
 -11 -14   0 14.8384 3.89404   8
 -11 -14   0 18.1149 2.80362   2
  11 -14   0 9.68242 5.55902   7
  11  14   0 16.0874 5.20755   4
  11  14   0 15.8701 4.49914   8
  11  14   0 23.8689 5.08454   7
  11  14   0 15.9820 4.22119   8
 -11  14   0 16.3241 4.37890   8
  11  14   0 11.9337 3.95885   1
 -11  14   0 23.1911 4.06177   2
  11  14   0 14.1870 4.63996   6
 -11  14   0 19.4729 5.05885   5
 -11  14   0 20.9921 4.34890   1
 -11  14   0 16.7295 3.84378   6
 -11  14   0 14.3946 4.24918   8
  12 -14   0 11.3672 4.16419   8
  12 -14   0 6.39904 3.69658   1
 -12 -14   0 9.94719 3.60030   8
 -12 -14   0 1.57803 3.10209   1
  12 -14   0 11.3502 5.61022   7
 -12 -14   0 7.80736 2.58005   5
 -12  14   0 13.7593 3.87312   1
 -12  14   0 10.0912 3.16274   6
  12  14   0 12.7925 4.95285   4
  12  14   0 11.7325 4.36726   6
  12  14   0 9.16765 4.02398   8
 -12  14   0 10.5949 4.01109   8
 -12  14   0 16.0827 3.94777   2
 -12  14   0 14.3630 4.85770   5
  12  14   0 5.09161 3.57892   1
  12  14   0 4.23662 4.64480   7
  13 -14   0 -0.8530 3.11265   1
 -13 -14   0 0.52376 2.31468   5
 -13 -14   0 3.19105 3.01380   1
  13 -14   0 3.94260 5.18978   7
 -13  14   0 -1.3899 4.22356   5
 -13  14   0 0.29306 3.39950   8
 -13  14   0 1.77277 2.99327   6
 -13  14   0 0.37468 3.40483   1
  13  14   0 1.07022 3.16264   1
  13  14   0 -3.3075 3.67709   8
 -13  14   0 -3.3859 3.73529   2
  13  14   0 -6.5845 4.12825   4
  13  14   0 0.68099 4.02588   7
  13  14   0 -2.8333 3.82866   6
 -14 -14   0 5.37125 2.82710   5
 -14 -14   0 5.91599 3.39655   1
  14 -14   0 9.54001 5.78061   7
  14 -14   0 4.72231 3.82415   1
  14  14   0 2.99725 3.95352   7
  14  14   0 14.2677 4.44843   6
 -14  14   0 9.15438 4.03707   8
  14  14   0 5.69546 3.63411   1
 -14  14   0 6.38538 3.73087   1
  14  14   0 4.09819 4.97066   4
 -14  14   0 4.27664 3.61097   2
  14  14   0 6.51711 4.14068   8
 -14  14   0 8.78080 3.02354   6
 -14  14   0 6.19057 4.91026   5
  15 -14   0 -6.7388 5.81030   7
 -15 -14   0 2.03931 2.93447   5
 -15 -14   0 -5.4073 3.02537   1
  15 -14   0 1.23533 3.77010   1
  15  14   0 -0.7452 3.76692   8
 -15  14   0 -4.6370 3.28984   5
 -15  14   0 -3.3671 3.70350   8
  15  14   0 1.50037 4.72198   4
 -15  14   0 1.48055 3.65743   2
 -15  14   0 1.11678 2.70772   6
  15  14   0 -7.9528 3.25008   7
 -15  14   0 0.04882 3.52588   1
  15  14   0 3.66967 4.02735   6
  15  14   0 -11.952 3.14708   1
 -16 -14   0 65.9343 9.81563   1
  16 -14   0 80.3345 10.2651   1
  16 -14   0 76.0904 11.9501   7
  16  14   0 78.2514 10.5805   7
  16  14   0 88.7059 10.6645   6
  16  14   0 74.1666 10.5299   8
  16  14   0 75.7689 10.3773   1
 -16  14   0 73.3080 9.52666   6
 -16  14   0 110.991 12.0215   5
 -16  14   0 81.8541 10.4984   1
 -16  14   0 94.6368 10.9067   8
  16  14   0 89.6968 11.6076   4
 -16  14   0 96.9520 10.6831   2
 -17 -14   0 6.03833 3.63317   1
  17 -14   0 7.21601 4.22507   1
  17 -14   0 5.11418 5.93790   7
  17  14   0 6.88640 4.40378   6
 -17  14   0 -2.6333 3.77955   8
  17  14   0 2.28832 4.16676   8
  17  14   0 10.1166 5.53784   4
 -17  14   0 10.2080 4.12798   2
  17  14   0 13.4002 4.96824   7
 -17  14   0 6.66904 5.31985   5
 -17  14   0 3.49482 3.05066   6
  17  14   0 12.6041 4.13450   1
 -17  14   0 6.93182 4.16450   1
  18 -14   0 9.20638 6.15022   7
 -18 -14   0 8.50655 3.81444   1
  18 -14   0 9.28516 4.60708   1
 -18  14   0 6.67155 4.25739   1
 -18  14   0 10.6629 5.92785   5
  18  14   0 12.9775 7.10261   7
  18  14   0 2.83566 4.02581   1
 -18  14   0 9.56255 4.76807   2
  18  14   0 0.02621 4.58985   8
  18  14   0 10.6586 5.64736   4
   0 -15   0 -1.3970 1.50893   5
   0 -15   0 -0.4747 2.38629   8
   0 -15   0 3.67097 2.57584   1
   0  15   0 -4.2095 2.66088   4
   0  15   0 0.06424 2.53737   2
   0  15   0 1.79936 2.59297   8
   0  15   0 2.78132 2.56432   8
   0  15   0 -1.2535 2.46431   1
   0  15   0 2.86574 2.96288   6
   0  15   0 -3.8094 2.24307   1
  -1 -15   0 112.599 10.0585   5
   1 -15   0 97.0647 10.9817   8
   1 -15   0 115.833 10.3533   5
  -1 -15   0 108.459 11.0394   8
   1 -15   0 111.743 10.9255   1
  -1 -15   0 116.437 11.1102   1
  -1  15   0 107.211 11.1824   4
   1  15   0 118.260 11.2637   8
   1  15   0 95.1312 11.0495   8
  -1  15   0 93.0775 11.0746   8
  -1  15   0 105.544 10.9100   1
  -1  15   0 104.405 11.2005   2
   1  15   0 99.2859 11.1272   4
   1  15   0 104.787 10.8729   1
   1  15   0 110.230 11.3592   6
   1  15   0 96.5903 10.9681   2
   1  15   0 110.830 11.0819   1
  -1  15   0 98.4044 11.1322   8
  -1  15   0 109.403 10.9444   6
  -1  15   0 115.179 11.3199   1
  -2 -15   0 93.2683 10.3084   1
  -2 -15   0 119.083 10.6146   8
   2 -15   0 96.7264 9.83083   5
  -2 -15   0 109.965 9.34749   5
   2 -15   0 89.9926 10.2765   1
   2 -15   0 115.910 10.6355   8
  -2  15   0 104.794 10.4208   1
  -2  15   0 92.4245 10.5410   1
   2  15   0 101.872 10.4495   2
   2  15   0 99.1657 10.5407   8
   2  15   0 84.7518 10.5234   4
   2  15   0 84.3318 10.7031   6
   2  15   0 108.047 10.5356   1
  -2  15   0 103.427 10.7666   8
   2  15   0 99.8766 10.6704   8
  -2  15   0 98.9123 10.6458   8
   2  15   0 97.2064 10.5318   1
  -2  15   0 100.849 10.7048   2
  -2  15   0 95.7675 10.6454   6
  -3 -15   0 256.221 23.8022   8
  -3 -15   0 245.512 23.6663   1
   3 -15   0 243.382 23.6808   1
   3 -15   0 247.623 23.8102   8
  -3 -15   0 281.394 22.8875   5
   3 -15   0 283.120 23.4513   5
  -3 -15   0 249.216 22.7917   5
   3  15   0 244.734 23.6540   2
   3  15   0 204.314 23.7545   4
   3  15   0 254.609 23.7933   1
   3  15   0 274.854 23.9492   8
  -3  15   0 265.624 23.8401   1
   3  15   0 262.363 23.7778   1
  -3  15   0 244.173 23.8385   1
   3  15   0 238.854 23.2732   3
   3  15   0 245.227 23.8493   8
   3  15   0 262.141 24.0888   6
  -3  15   0 257.697 23.9544   2
  -3  15   0 261.032 23.9672   8
  -3  15   0 244.401 23.9439   8
  -3  15   0 236.332 23.8299   6
   4 -15   0 18.3256 3.62866   1
  -4 -15   0 25.9831 2.35847   5
  -4 -15   0 23.7104 3.86470   1
  -4 -15   0 16.8460 2.19538   5
  -4 -15   0 18.3613 3.78734   8
   4 -15   0 15.5734 3.78881   8
   4 -15   0 20.5002 3.50218   5
   4  15   0 16.1032 3.33266   2
  -4  15   0 16.8243 3.82553   2
   4  15   0 12.9310 3.50007   6
   4  15   0 19.3861 3.99040   8
   4  15   0 17.9501 3.57605   1
   4  15   0 17.1193 3.01694   3
  -4  15   0 19.3507 3.95540   5
  -4  15   0 15.3603 3.71227   1
  -4  15   0 16.3037 3.63130   1
   4  15   0 20.6318 3.87059   8
   4  15   0 21.2684 3.90073   1
  -4  15   0 23.7304 4.09577   8
  -4  15   0 28.2776 4.27874   8
  -4  15   0 13.5823 3.68963   6
   4  15   0 23.3385 4.37135   4
  -5 -15   0 25.3235 2.37625   5
   5 -15   0 18.4368 3.67272   1
  -5 -15   0 17.0860 3.84958   8
   5 -15   0 19.8982 4.04557   8
  -5 -15   0 24.2025 4.04983   1
   5 -15   0 16.8853 3.69471   5
  -5 -15   0 21.9103 3.30055   2
   5  15   0 16.8366 4.28152   4
   5  15   0 16.4466 4.22149   6
  -5  15   0 17.5526 3.81600   1
  -5  15   0 18.1318 4.27260   5
   5  15   0 22.2180 3.41925   3
   5  15   0 24.7528 4.11336   8
   5  15   0 23.7508 3.91866   1
  -5  15   0 15.1094 3.96672   8
  -5  15   0 21.1288 4.11291   2
   5  15   0 14.9292 4.07750   8
  -5  15   0 19.5903 4.08254   8
   5  15   0 20.2720 3.68219   2
  -5  15   0 19.5807 3.92494   1
  -5  15   0 19.5211 3.94575   6
   5  15   0 18.6242 3.96852   1
  -6 -15   0 31.3844 4.30327   2
  -6 -15   0 22.9563 4.48841   8
   6 -15   0 23.9238 4.42241   1
  -6 -15   0 22.3216 2.94457   5
   6 -15   0 20.4303 4.48129   8
  -6 -15   0 27.8187 4.49378   1
  -6  15   0 21.9242 4.66697   8
   6  15   0 17.9487 4.16880   1
   6  15   0 27.2270 3.38358   3
  -6  15   0 44.7702 6.02631   5
   6  15   0 23.2222 4.59582   1
   6  15   0 22.8995 4.67596   8
  -6  15   0 16.5869 4.45800   1
  -6  15   0 22.6180 4.59751   8
   6  15   0 26.8059 4.51068   8
  -6  15   0 29.2010 4.85217   2
  -6  15   0 27.1611 4.51852   6
  -6  15   0 20.3718 4.42002   1
   6  15   0 21.3282 4.06169   2
   6  15   0 19.5830 4.78510   6
   6  15   0 27.2015 5.14047   4
   7 -15   0 27.7281 4.73707   1
  -7 -15   0 38.7145 4.58641   2
   7 -15   0 28.1844 4.85497   8
  -7 -15   0 34.6304 5.06248   8
  -7 -15   0 28.4334 3.51233   5
  -7 -15   0 25.8632 4.69469   1
   7  15   0 44.5116 6.32164   6
  -7  15   0 28.2984 5.14745   5
  -7  15   0 34.5072 5.15108   8
  -7  15   0 34.2366 5.46620   8
   7  15   0 35.2434 5.77374   4
   7  15   0 32.7252 5.00505   1
  -7  15   0 31.4001 5.01249   1
   7  15   0 33.5090 5.19382   8
  -7  15   0 28.2367 4.72084   6
   7  15   0 41.7647 5.35427   1
   7  15   0 46.1389 5.95477   8
  -7  15   0 27.3894 4.97681   2
   8 -15   0 4.16930 3.20508   8
  -8 -15   0 0.89221 2.87640   1
  -8 -15   0 4.39626 1.51611   5
  -8 -15   0 1.12684 1.95040   2
   8 -15   0 2.28655 2.98674   1
  -8 -15   0 3.62003 3.06476   8
   8 -15   0 4.44641 4.14781   7
   8  15   0 0.84264 3.12990   8
  -8  15   0 -0.1889 3.13188   8
   8  15   0 -4.6453 3.72679   4
   8  15   0 3.00794 2.81432   6
  -8  15   0 -2.7620 2.90883   2
   8  15   0 -0.1729 2.97701   8
  -8  15   0 4.91515 3.11306   1
  -8  15   0 5.13622 3.56968   5
  -8  15   0 -0.3347 2.49538   6
  -8  15   0 2.46283 3.39645   8
  -9 -15   0 1.65567 3.08145   1
   9 -15   0 -3.4353 4.02532   7
  -9 -15   0 1.83910 1.71658   5
  -9 -15   0 2.25327 2.21929   2
   9 -15   0 7.62625 3.58539   8
  -9 -15   0 -3.3824 2.86578   8
   9 -15   0 1.26906 3.21269   1
  -9  15   0 1.61616 2.77760   6
  -9  15   0 -2.1138 3.16973   2
  -9  15   0 5.25760 3.53206   1
   9  15   0 7.80997 3.35870   6
  -9  15   0 2.15025 3.40316   8
   9  15   0 -2.8607 3.51981   8
   9  15   0 -0.6012 4.17939   4
  -9  15   0 3.52008 3.55516   8
   9  15   0 2.69867 3.34304   8
  -9  15   0 -0.0830 3.62448   5
   9  15   0 1.06545 3.64484   7
   9  15   0 3.69211 3.40113   1
  10 -15   0 7.78745 3.85176   8
  10 -15   0 8.12376 3.61379   1
 -10 -15   0 11.2233 2.51185   2
  10 -15   0 18.7431 6.03943   7
 -10 -15   0 9.44189 3.63062   8
 -10 -15   0 15.8869 2.49930   5
 -10 -15   0 9.71067 3.41045   1
 -10  15   0 12.7488 4.09319   1
  10  15   0 12.8064 4.83888   7
 -10  15   0 15.0890 3.81156   6
 -10  15   0 8.24323 3.88999   2
  10  15   0 19.8033 4.32214   8
 -10  15   0 12.0960 4.57221   5
  10  15   0 3.25658 4.56335   4
  10  15   0 8.84470 3.85286   1
 -10  15   0 18.6588 4.25289   8
 -10  15   0 11.8078 4.14433   8
  10  15   0 5.38370 4.20098   6
  10  15   0 6.50215 3.86140   8
  11 -15   0 6.91122 3.90577   8
 -11 -15   0 9.71918 2.40439   5
 -11 -15   0 3.71297 3.30259   1
  11 -15   0 7.36091 3.74701   1
  11 -15   0 9.16525 5.47576   7
 -11 -15   0 10.4370 3.44556   8
  11  15   0 11.6384 4.17928   8
  11  15   0 9.01428 3.72952   1
 -11  15   0 11.4044 3.86347   2
 -11  15   0 13.4279 4.66311   5
 -11  15   0 6.18843 3.49056   6
  11  15   0 5.64550 4.24545   6
 -11  15   0 10.4332 3.95936   1
  11  15   0 8.00322 4.63881   7
 -11  15   0 10.5313 3.99837   8
  11  15   0 2.79489 4.43492   4
  12 -15   0 71.1315 8.57370   1
  12 -15   0 66.5998 10.6143   7
  12 -15   0 50.4727 9.12766   8
 -12 -15   0 58.4950 6.98127   5
 -12 -15   0 61.2604 7.92265   1
  12  15   0 60.4541 8.23289   1
 -12  15   0 66.2987 8.72658   1
  12  15   0 64.4105 8.63738   7
  12  15   0 73.7137 9.60253   4
 -12  15   0 68.4160 8.17116   6
 -12  15   0 64.5884 9.34389   5
 -12  15   0 66.5569 9.04377   8
  12  15   0 66.1729 9.08657   6
 -12  15   0 69.7490 8.83434   2
  12  15   0 58.2505 8.67229   8
 -13 -15   0 33.6741 5.45505   1
  13 -15   0 35.2174 7.71358   7
  13 -15   0 33.8077 5.91210   1
 -13 -15   0 40.6219 5.03620   5
  13  15   0 36.4206 6.14668   8
 -13  15   0 32.7439 6.01446   8
 -13  15   0 37.2513 5.91882   1
  13  15   0 21.5629 5.32220   1
  13  15   0 39.9783 7.11497   4
  13  15   0 30.6360 6.21936   6
 -13  15   0 41.0450 7.07421   5
  13  15   0 47.8983 7.00000   7
 -13  15   0 38.0610 5.76862   6
 -13  15   0 30.6134 5.74674   2
  14 -15   0 3.74437 5.35830   7
 -14 -15   0 -3.7407 2.98096   1
  14 -15   0 5.46102 4.05869   1
  14  15   0 -1.5494 4.11870   6
 -14  15   0 2.75597 2.91865   6
  14  15   0 -3.0393 3.23166   1
  14  15   0 -0.2250 4.36092   4
  14  15   0 -0.8720 4.49378   7
 -14  15   0 0.44311 3.54780   1
  14  15   0 5.82577 4.24714   8
 -14  15   0 8.30300 4.32027   2
 -14  15   0 8.30465 4.99793   5
 -14  15   0 3.76804 3.98233   8
  15 -15   0 9.10722 6.02772   7
  15 -15   0 1.44382 3.89403   1
 -15 -15   0 5.42331 3.47790   1
  15  15   0 9.08378 4.55015   7
 -15  15   0 5.57175 3.88721   1
 -15  15   0 -3.1990 3.74577   8
 -15  15   0 -1.4817 2.75446   6
  15  15   0 4.13874 4.32361   6
  15  15   0 -3.0452 3.42593   1
 -15  15   0 2.65918 4.98024   5
  15  15   0 -2.4660 3.83898   8
  15  15   0 9.82341 5.08170   4
 -15  15   0 -1.9591 3.58120   2
  16 -15   0 2.16916 5.71220   7
  16 -15   0 3.11562 4.10094   1
 -16 -15   0 -2.6103 2.86603   1
 -16  15   0 0.32923 4.74019   5
  16  15   0 -2.0047 3.80729   8
  16  15   0 -5.3961 3.41103   1
  16  15   0 2.45530 4.30114   6
 -16  15   0 0.47134 4.06337   2
  16  15   0 0.51508 4.41384   7
 -16  15   0 -1.6521 3.73431   1
 -16  15   0 0.07759 3.84892   8
 -16  15   0 -3.1832 3.13895   6
  16  15   0 -0.3948 4.78817   4
  17 -15   0 0.18585 6.62153   7
  17 -15   0 6.74031 4.21392   1
 -17 -15   0 -2.2804 3.14729   1
  17  15   0 5.10345 4.45270   6
  17  15   0 -7.6118 3.76711   8
 -17  15   0 6.55256 4.44046   1
 -17  15   0 8.21917 4.48442   8
  17  15   0 13.6393 5.85333   4
  17  15   0 0.48019 4.61501   7
  17  15   0 1.66761 3.93488   1
 -17  15   0 8.85923 5.74553   5
 -17  15   0 2.82306 3.99984   2
  18 -15   0 6.39025 4.41666   1
  18 -15   0 -4.2705 5.59849   7
 -18 -15   0 0.87814 3.24906   1
  18  15   0 2.18388 4.35861   6
 -18  15   0 -3.9386 3.91209   2
  18  15   0 -0.3472 4.08271   1
 -18  15   0 2.59217 5.34323   5
  18  15   0 6.46277 5.58787   4
 -18  15   0 2.10277 4.45983   1
   0 -16   0 66.4642 7.62408   8
   0 -16   0 73.2705 7.64143   1
   0 -16   0 67.5666 6.52109   5
   0  16   0 64.5935 7.72889   8
   0  16   0 59.6806 7.76618   1
   0  16   0 59.8708 7.73198   2
   0  16   0 50.7835 7.64383   8
   0  16   0 53.4955 7.63597   4
   0  16   0 72.2649 7.68461   1
   0  16   0 58.8941 7.87648   6
  -1 -16   0 98.3637 8.36893   5
   1 -16   0 94.6009 9.60463   8
  -1 -16   0 101.630 9.53746   1
   1 -16   0 84.8095 9.33390   1
   1 -16   0 96.2425 8.68717   5
  -1 -16   0 92.3076 9.50568   8
  -1  16   0 78.9775 9.67912   2
   1  16   0 94.0422 9.62457   2
   1  16   0 77.0018 9.71447   6
  -1  16   0 82.0783 9.61001   8
   1  16   0 78.7399 9.59824   8
   1  16   0 83.7075 9.65944   1
  -1  16   0 69.5986 9.42923   1
   1  16   0 102.467 9.79923   8
  -1  16   0 96.0825 9.81299   8
   1  16   0 86.4066 9.41140   1
  -1  16   0 81.9632 9.78108   6
   1  16   0 67.5152 9.46181   4
  -1  16   0 75.5799 9.23272   1
  -1  16   0 79.3832 9.61264   4
   2 -16   0 30.9496 4.76746   1
   2 -16   0 24.5457 4.72752   8
  -2 -16   0 35.1568 3.62626   5
  -2 -16   0 36.4391 4.95938   1
  -2 -16   0 43.8372 5.65326   8
   2 -16   0 37.9512 4.43954   5
   2  16   0 32.3276 4.96290   2
   2  16   0 25.8121 4.71963   1
   2  16   0 43.9946 5.69445   8
   2  16   0 33.7344 5.26970   6
  -2  16   0 28.8395 4.87479   1
   2  16   0 39.5214 5.48265   1
   2  16   0 27.9157 5.20304   4
  -2  16   0 29.7485 5.08438   2
  -2  16   0 31.1351 5.00064   8
  -2  16   0 40.0642 5.83010   8
  -2  16   0 42.5913 6.01804   6
   2  16   0 25.9711 4.88035   8
  -2  16   0 29.7861 4.76663   1
  -3 -16   0 233.107 21.6117   8
   3 -16   0 238.725 21.6635   8
   3 -16   0 216.893 21.4097   1
  -3 -16   0 228.557 20.4528   5
  -3 -16   0 234.963 21.4960   1
  -3 -16   0 249.031 20.5451   5
   3 -16   0 226.618 21.1044   5
  -3  16   0 216.067 21.6946   8
  -3  16   0 234.865 21.8104   8
   3  16   0 212.090 21.6661   4
  -3  16   0 231.266 21.7540   1
   3  16   0 214.859 20.9804   3
   3  16   0 205.624 21.5399   6
   3  16   0 220.548 21.5547   1
  -3  16   0 208.116 21.5129   2
   3  16   0 238.179 21.5320   1
   3  16   0 219.931 21.5731   2
   3  16   0 225.509 21.6838   8
  -3  16   0 222.498 21.6674   6
  -3  16   0 246.764 21.6725   1
   3  16   0 248.141 21.7526   8
   4 -16   0 3.18214 2.68629   1
  -4 -16   0 10.7679 3.11214   1
   4 -16   0 1.09919 2.84028   8
  -4 -16   0 -0.1565 2.91114   8
  -4 -16   0 7.22436 1.09432   5
   4 -16   0 5.86672 2.39616   5
  -4 -16   0 5.34113 1.00413   5
   4  16   0 4.15027 3.31163   6
   4  16   0 0.50958 2.81194   8
  -4  16   0 6.56961 3.32249   8
   4  16   0 4.23778 3.12999   1
   4  16   0 2.98064 2.56590   2
   4  16   0 6.16461 2.27946   3
   4  16   0 3.77679 3.28512   8
  -4  16   0 3.08954 3.26169   2
  -4  16   0 -1.0985 2.99915   8
   4  16   0 0.31912 3.38780   4
  -4  16   0 8.99623 3.19010   1
   4  16   0 3.60377 2.75935   1
  -4  16   0 2.08247 3.32610   6
  -4  16   0 7.83883 3.24491   1
  -5 -16   0 27.7262 2.88641   5
  -5 -16   0 32.2118 2.85620   5
  -5 -16   0 27.6425 4.64895   8
  -5 -16   0 47.6606 5.51280   1
   5 -16   0 26.9717 4.46678   1
   5 -16   0 28.5626 4.67810   8
  -5  16   0 26.1551 4.70694   6
   5  16   0 30.6504 5.25617   4
   5  16   0 41.7720 5.69939   8
   5  16   0 36.0808 5.17701   8
   5  16   0 25.6115 5.06420   6
  -5  16   0 19.5184 4.58830   1
  -5  16   0 28.3529 4.64926   1
  -5  16   0 28.4416 4.95654   8
   5  16   0 30.0917 4.62632   1
  -5  16   0 20.4217 4.67349   8
   5  16   0 31.9751 4.78650   1
   5  16   0 32.3868 4.17939   3
   5  16   0 24.2806 4.16894   2
  -5  16   0 20.4824 4.71212   2
  -5  16   0 24.0065 4.83862   5
   6 -16   0 19.9825 3.84693   1
  -6 -16   0 16.6906 3.92987   8
  -6 -16   0 15.8554 2.04124   5
   6 -16   0 17.2605 3.98903   8
  -6 -16   0 15.4052 4.02683   1
   6  16   0 12.8080 4.31758   4
  -6  16   0 20.3539 4.41968   8
  -6  16   0 15.3134 4.04847   5
   6  16   0 22.3560 3.03912   3
  -6  16   0 14.7358 3.62940   2
   6  16   0 19.0299 3.63106   2
   6  16   0 23.2975 4.38102   8
   6  16   0 20.4270 3.86925   8
  -6  16   0 16.7441 4.01762   1
   6  16   0 15.7438 4.05285   1
   6  16   0 19.6276 3.87351   1
  -6  16   0 24.3187 4.08049   6
   6  16   0 18.8780 4.33741   6
  -6  16   0 18.4898 3.94978   8
   7 -16   0 -6.9724 2.63866   1
   7 -16   0 4.71454 3.24727   8
  -7 -16   0 -2.0265 2.89107   1
  -7 -16   0 -0.0360 0.95136   5
  -7 -16   0 -1.3517 2.97258   8
   7  16   0 -1.9031 3.20590   8
  -7  16   0 1.28272 3.15363   1
   7  16   0 2.70123 2.94768   8
  -7  16   0 3.06459 3.47899   8
  -7  16   0 2.11294 3.20288   8
   7  16   0 -0.3857 0.98315   3
   7  16   0 2.19934 3.30050   1
   7  16   0 0.83273 3.93896   4
  -7  16   0 1.93268 2.83133   6
  -7  16   0 -1.2984 3.17875   2
  -7  16   0 -0.4900 3.64481   5
   7  16   0 4.13433 3.74477   6
   8 -16   0 2.54739 3.30516   8
   8 -16   0 -3.5781 2.85439   1
  -8 -16   0 0.73567 1.24102   5
  -8 -16   0 2.14591 3.08380   1
  -8 -16   0 1.65108 3.01606   8
  -8  16   0 -1.1299 3.28079   1
  -8  16   0 5.17539 3.45557   8
  -8  16   0 -3.7972 2.61653   6
   8  16   0 5.90581 3.48689   8
  -8  16   0 -1.2294 3.17616   2
   8  16   0 -2.3956 3.95087   4
  -8  16   0 -3.1080 3.30578   8
   8  16   0 2.14681 3.21995   8
  -8  16   0 -3.0639 3.13088   5
   8  16   0 -3.4337 3.42184   6
  -9 -16   0 6.87192 3.39042   8
  -9 -16   0 4.61867 1.72250   5
  -9 -16   0 5.46157 3.38571   1
  -9 -16   0 7.23042 2.30351   2
   9 -16   0 14.7882 6.15798   7
   9 -16   0 8.71894 3.60042   1
   9 -16   0 12.8877 3.90213   8
   9  16   0 5.84035 3.49951   8
   9  16   0 10.3846 3.83627   1
  -9  16   0 16.3771 4.08090   1
   9  16   0 0.62965 3.82930   6
  -9  16   0 9.67482 3.96314   2
   9  16   0 1.71688 4.47704   4
  -9  16   0 11.4594 3.44643   6
  -9  16   0 13.1195 4.06445   8
  -9  16   0 6.25536 4.01054   5
  -9  16   0 5.77810 3.86359   8
 -10 -16   0 3.08448 1.70860   5
  10 -16   0 2.60086 3.64649   1
 -10 -16   0 4.88340 3.30444   8
 -10 -16   0 4.22018 2.13661   2
  10 -16   0 6.16417 5.55495   7
 -10 -16   0 6.12152 3.31605   1
  10 -16   0 2.03970 3.78013   8
 -10  16   0 0.71630 3.30706   2
  10  16   0 1.61310 3.17079   6
  10  16   0 -2.6543 3.19720   1
  10  16   0 2.91944 3.93466   8
  10  16   0 7.77356 4.84183   7
 -10  16   0 3.86514 3.00134   6
 -10  16   0 2.73974 3.87006   5
 -10  16   0 3.77518 3.52565   8
  10  16   0 -3.8077 4.40393   4
 -10  16   0 3.92965 3.82125   1
  11 -16   0 -4.0655 3.61902   8
  11 -16   0 3.59710 5.55874   7
 -11 -16   0 -2.2074 2.75682   1
  11 -16   0 2.41558 3.45627   1
 -11 -16   0 1.32296 1.77336   5
 -11  16   0 -0.8092 3.87719   5
 -11  16   0 -0.7338 2.66206   6
  11  16   0 3.86367 3.59976   1
 -11  16   0 2.76188 3.72245   8
  11  16   0 -7.2659 3.49282   8
  11  16   0 -3.3577 4.40145   4
  11  16   0 -4.0406 3.98552   6
  11  16   0 0.33145 4.52827   7
 -11  16   0 -1.5660 3.53693   2
 -11  16   0 5.52202 3.90070   1
  12 -16   0 61.4988 10.1867   7
  12 -16   0 63.9953 8.66656   1
 -12 -16   0 64.9079 8.20622   1
  12  16   0 60.6753 8.96852   8
 -12  16   0 66.3415 9.30299   8
 -12  16   0 54.2939 8.77339   1
 -12  16   0 74.9739 9.63061   5
  12  16   0 67.3093 9.80939   4
 -12  16   0 79.8698 9.19292   2
  12  16   0 71.5254 8.94556   7
 -12  16   0 61.5067 7.93746   6
  12  16   0 52.9685 8.30670   1
  12  16   0 71.8210 9.36211   6
 -13 -16   0 20.5384 4.29791   1
  13 -16   0 13.8162 6.46721   7
  13 -16   0 19.0461 4.89334   1
 -13  16   0 21.6270 5.00577   2
  13  16   0 23.8928 6.26396   4
 -13  16   0 18.1328 5.01438   8
  13  16   0 15.8201 4.31965   1
  13  16   0 12.9920 4.74964   8
 -13  16   0 20.8594 5.71052   5
 -13  16   0 18.2142 4.44925   6
  13  16   0 16.9949 5.55714   7
 -13  16   0 23.0175 5.03192   1
  13  16   0 22.0003 5.43238   6
 -14 -16   0 13.9025 4.17025   1
  14 -16   0 18.2577 6.85924   7
  14 -16   0 24.7994 5.12124   1
  14  16   0 19.0528 5.51548   7
 -14  16   0 14.0493 4.62799   1
  14  16   0 16.1238 4.92621   8
 -14  16   0 10.7645 4.80828   8
  14  16   0 12.9731 5.22488   6
 -14  16   0 10.9841 4.57332   2
 -14  16   0 15.6308 4.21701   6
  14  16   0 14.6969 5.87402   4
 -14  16   0 17.8714 5.70234   5
  14  16   0 10.9257 4.20503   1
  15 -16   0 15.7237 6.57124   7
  15 -16   0 7.40520 4.31265   1
 -15 -16   0 4.94351 3.71000   1
 -15  16   0 7.55225 3.89477   6
  15  16   0 19.7160 5.87873   4
  15  16   0 13.4376 5.05044   7
 -15  16   0 7.84107 4.57151   8
  15  16   0 2.65108 3.92483   1
 -15  16   0 7.47169 4.24188   2
  15  16   0 1.22212 4.02418   8
  15  16   0 9.09740 5.15061   6
 -15  16   0 9.85116 4.37530   1
 -15  16   0 16.8127 5.72238   5
 -16 -16   0 2.27331 3.65272   1
  16 -16   0 3.01488 4.16318   1
  16 -16   0 -2.0815 5.87622   7
  16  16   0 0.93782 3.87340   1
 -16  16   0 -1.4028 3.76435   2
 -16  16   0 5.08724 5.47393   5
  16  16   0 -5.3908 4.32469   7
 -16  16   0 -3.9944 3.03690   6
  16  16   0 -2.9120 4.26746   8
  16  16   0 8.88653 5.31734   4
 -16  16   0 1.15874 3.85924   1
  16  16   0 9.53828 4.62774   6
 -16  16   0 7.75100 4.54106   8
  17 -16   0 -2.3066 5.90104   7
 -17 -16   0 3.20492 3.40163   1
  17 -16   0 2.67415 4.38701   1
 -17  16   0 1.62488 4.06478   2
 -17  16   0 2.52328 4.22221   8
  17  16   0 -4.8702 3.68805   1
 -17  16   0 2.85402 4.16103   1
  17  16   0 4.45541 4.56876   6
  17  16   0 4.15161 4.78792   7
 -17  16   0 0.76118 4.95411   5
  17  16   0 -1.1162 4.23982   8
  17  16   0 16.1197 5.97167   4
   0 -17   0 0.99162 2.62887   1
   0 -17   0 0.73283 1.67687   5
   0 -17   0 1.38058 2.65998   8
   0  17   0 0.01362 3.12963   6
   0  17   0 1.79829 2.81516   8
   0  17   0 -1.3435 2.82969   8
   0  17   0 -0.0304 3.02546   4
   0  17   0 0.46502 2.87647   1
   0  17   0 -4.5729 2.30734   1
   0  17   0 3.00662 3.10145   2
  -1 -17   0 11.0046 3.12045   1
   1 -17   0 10.1469 3.14549   1
  -1 -17   0 7.05410 1.87128   5
   1 -17   0 5.25856 3.29271   8
   1 -17   0 10.6702 2.39668   5
  -1 -17   0 8.02127 3.08213   8
   1  17   0 11.7878 3.81754   4
   1  17   0 8.01969 3.30696   1
  -1  17   0 9.44520 3.53994   6
   1  17   0 7.81058 3.72586   6
  -1  17   0 8.03091 2.93826   1
   1  17   0 4.18692 3.14584   2
  -1  17   0 9.87975 3.46597   2
   1  17   0 12.1794 3.16340   1
  -1  17   0 12.5923 3.51335   8
   1  17   0 7.19956 3.27606   8
  -1  17   0 9.39581 3.65634   4
  -1  17   0 7.32030 3.27294   8
   1  17   0 9.48247 3.22580   8
  -1  17   0 8.33617 3.33913   1
   2 -17   0 22.2960 4.03605   8
   2 -17   0 21.1603 3.92311   1
  -2 -17   0 27.1324 4.14184   1
  -2 -17   0 23.5791 2.74266   5
  -2 -17   0 18.6126 3.95136   8
   2 -17   0 21.8145 3.32942   5
  -2  17   0 21.5175 4.39183   4
   2  17   0 19.4747 4.57177   6
   2  17   0 28.7385 4.50100   1
   2  17   0 20.9725 3.85611   1
   2  17   0 22.1320 4.20878   8
  -2  17   0 21.8659 4.00248   1
  -2  17   0 13.9116 4.04380   8
   2  17   0 14.4724 3.76854   2
  -2  17   0 13.5921 4.08277   2
  -2  17   0 15.1635 3.96428   1
   2  17   0 28.0288 4.45281   8
  -2  17   0 15.5247 4.21151   6
  -2  17   0 22.3851 4.18378   8
   2  17   0 16.3099 4.26786   4
  -3 -17   0 -0.5452 0.94960   5
  -3 -17   0 -1.5454 2.72476   1
  -3 -17   0 -5.2084 2.68456   8
  -3 -17   0 -1.2028 1.21142   5
   3 -17   0 6.12624 2.82463   1
   3 -17   0 3.13165 2.40633   5
   3 -17   0 -0.1250 2.50124   8
   3  17   0 2.32859 3.24801   4
   3  17   0 1.30344 3.05892   1
   3  17   0 -4.8542 3.05613   6
  -3  17   0 -5.9513 2.72167   6
  -3  17   0 -4.6746 2.48425   1
   3  17   0 -0.1706 2.52399   1
   3  17   0 0.65873 2.16921   3
  -3  17   0 0.65119 2.95679   8
  -3  17   0 -3.2128 2.89529   2
   3  17   0 0.55203 2.64708   8
   3  17   0 3.16590 3.09192   8
  -3  17   0 1.21192 2.99819   1
   3  17   0 -0.8338 2.66473   2
  -3  17   0 -4.4660 2.70964   8
   4 -17   0 35.1976 4.43776   5
  -4 -17   0 29.2207 4.39083   1
  -4 -17   0 22.7019 2.24566   5
   4 -17   0 15.2005 3.82975   1
  -4 -17   0 23.3419 4.37316   8
   4 -17   0 21.3035 4.08289   8
   4  17   0 25.0568 4.27131   8
  -4  17   0 18.6396 4.12132   1
  -4  17   0 16.0568 4.26871   2
   4  17   0 20.6658 3.45550   3
   4  17   0 18.0619 3.79091   2
  -4  17   0 19.1563 4.41409   8
  -4  17   0 19.7226 4.32130   8
  -4  17   0 18.4970 4.20445   6
   4  17   0 24.0110 4.91549   4
   4  17   0 33.7123 4.94353   8
   4  17   0 17.2327 4.13313   1
  -4  17   0 25.0350 4.60104   1
   4  17   0 15.5707 4.66583   6
   4  17   0 21.2236 3.99131   1
  -5 -17   0 25.7645 4.57636   8
  -5 -17   0 33.6177 4.91006   1
   5 -17   0 24.7363 4.37646   1
   5 -17   0 25.6015 4.49182   8
  -5  17   0 19.8479 4.58375   1
   5  17   0 32.1190 4.97211   1
  -5  17   0 33.9962 5.02838   2
   5  17   0 19.5610 3.49272   3
   5  17   0 29.6684 4.85533   8
  -5  17   0 20.1694 4.64063   8
  -5  17   0 22.4998 4.72830   8
   5  17   0 28.6743 5.32497   8
   5  17   0 24.6897 4.96848   6
   5  17   0 21.8888 4.93251   4
   5  17   0 21.9782 3.98214   2
  -5  17   0 32.4803 4.80102   6
  -6 -17   0 20.5149 3.99857   8
  -6 -17   0 16.0501 3.69597   1
   6 -17   0 4.15703 3.25217   1
   6 -17   0 10.9702 3.68636   8
   6  17   0 10.2101 4.02359   8
  -6  17   0 5.83622 3.40123   5
   6  17   0 11.3283 3.79732   1
  -6  17   0 12.2550 3.92213   2
  -6  17   0 12.6409 3.84959   8
   6  17   0 10.8434 4.29139   4
  -6  17   0 11.6092 3.59456   6
   6  17   0 6.09784 2.17464   3
   6  17   0 10.9504 3.58005   8
   6  17   0 6.90402 2.89874   2
  -6  17   0 9.21362 3.67039   1
   6  17   0 5.70488 3.81992   6
  -6  17   0 14.7850 4.21478   8
  -7 -17   0 36.4360 5.76750   8
  -7 -17   0 34.5141 5.60174   1
   7 -17   0 27.9673 5.49924   8
   7 -17   0 49.6296 6.52042   1
  -7 -17   0 37.9240 3.74395   5
  -7  17   0 51.3191 7.20449   8
   7  17   0 41.9984 6.13909   6
   7  17   0 50.2948 7.07487   8
  -7  17   0 36.9410 6.04400   1
  -7  17   0 28.0973 5.88729   2
  -7  17   0 37.2331 5.94008   6
  -7  17   0 40.5586 6.11052   8
   7  17   0 44.9153 7.11316   4
   7  17   0 53.1651 7.14231   1
   7  17   0 44.3167 4.12673   3
   7  17   0 31.3106 5.57128   8
  -7  17   0 43.6748 6.29044   5
   8 -17   0 15.0459 4.10913   1
  -8 -17   0 16.8554 4.08924   1
  -8 -17   0 20.4977 4.17374   8
  -8 -17   0 15.9968 2.20783   5
   8 -17   0 15.1449 4.67068   8
   8  17   0 19.7509 4.60592   8
   8  17   0 11.4911 4.03522   1
   8  17   0 19.4297 4.90594   6
   8  17   0 12.3800 4.09569   8
  -8  17   0 13.0690 4.26568   2
  -8  17   0 13.2867 3.94296   6
  -8  17   0 20.3939 4.81860   5
  -8  17   0 26.6594 5.08447   8
  -8  17   0 18.1513 4.56277   1
  -8  17   0 21.2359 4.67618   8
   8  17   0 24.4652 5.41866   4
  -9 -17   0 49.7545 6.73479   8
  -9 -17   0 40.7079 4.33707   5
   9 -17   0 32.4301 6.05530   8
   9 -17   0 42.5730 6.21689   1
  -9 -17   0 44.4616 6.37348   1
  -9  17   0 39.5062 6.53907   5
  -9  17   0 44.3246 6.53972   8
  -9  17   0 38.9146 6.05071   6
  -9  17   0 47.6187 6.58010   1
   9  17   0 29.3369 6.43044   6
  -9  17   0 38.0756 6.36686   2
   9  17   0 58.1155 7.38890   1
   9  17   0 41.3602 7.09937   4
  10 -17   0 52.7766 8.09688   1
  10 -17   0 46.6034 8.25920   8
 -10 -17   0 59.8444 7.57453   1
 -10  17   0 48.7886 7.66200   1
 -10  17   0 51.2301 8.13342   5
  10  17   0 52.5677 7.91227   6
  10  17   0 65.8457 7.92773   1
  10  17   0 57.6050 9.00192   4
  10  17   0 74.1138 8.63362   8
 -10  17   0 52.6409 7.70414   2
 -10  17   0 54.5327 7.73340   8
 -10  17   0 52.9858 7.39545   6
  10  17   0 61.5672 8.43858   7
  11 -17   0 57.5516 9.59903   7
  11 -17   0 53.1177 7.93717   1
 -11 -17   0 60.0210 7.91409   1
  11  17   0 63.2871 8.50399   8
 -11  17   0 54.0570 7.33290   6
  11  17   0 59.4040 8.85283   6
  11  17   0 51.0072 7.68825   1
 -11  17   0 55.3638 8.36059   1
 -11  17   0 63.6706 8.70784   5
  11  17   0 49.4948 8.22245   7
 -11  17   0 39.0266 7.22868   2
  11  17   0 59.9472 9.13727   4
 -11  17   0 58.0749 8.59699   8
  12 -17   0 17.3510 7.00534   7
  12 -17   0 19.0501 4.86350   1
 -12 -17   0 14.1674 4.19816   1
 -12  17   0 23.5124 5.33053   8
  12  17   0 24.9564 5.46035   7
 -12  17   0 25.9709 4.71246   6
  12  17   0 19.5473 6.07185   4
 -12  17   0 12.7767 4.79917   1
  12  17   0 21.7554 5.55528   8
 -12  17   0 18.4564 5.36310   5
  12  17   0 17.3653 4.61151   1
 -12  17   0 16.0286 4.85726   2
  12  17   0 12.1713 5.19220   6
  13 -17   0 -3.9889 3.54801   1
  13 -17   0 -1.3074 5.92432   7
 -13 -17   0 5.58644 3.54725   1
  13  17   0 -0.4552 3.86239   8
  13  17   0 1.34368 4.42625   6
  13  17   0 -1.2283 3.61900   1
 -13  17   0 3.01388 3.96131   1
 -13  17   0 5.03681 4.49061   5
  13  17   0 -0.9373 4.97876   7
 -13  17   0 2.86605 3.82071   2
 -13  17   0 8.62484 3.34912   6
  13  17   0 1.72499 5.13148   4
 -13  17   0 4.85656 4.12631   8
  14 -17   0 -1.4421 6.03329   7
  14 -17   0 0.32549 4.25368   1
 -14 -17   0 -0.4250 3.37142   1
  14  17   0 1.11263 5.14265   4
  14  17   0 5.38361 3.77128   1
  14  17   0 7.54277 4.78404   6
  14  17   0 0.23053 4.74540   7
 -14  17   0 11.0434 5.15458   5
  14  17   0 2.25291 4.06272   8
 -14  17   0 0.50605 4.22943   8
 -14  17   0 10.7235 4.40766   1
 -14  17   0 1.18808 3.09905   6
 -14  17   0 4.59795 3.98706   2
 -15 -17   0 47.2103 7.02156   1
  15 -17   0 46.4881 7.58249   1
  15 -17   0 57.0152 10.0701   7
  15  17   0 63.8833 9.05276   6
 -15  17   0 56.2206 8.77610   5
  15  17   0 68.6574 9.24954   7
 -15  17   0 67.8470 9.03476   2
  15  17   0 59.4738 9.38337   4
  15  17   0 27.7709 7.15887   8
  15  17   0 37.0676 6.85597   1
 -15  17   0 68.9184 9.46084   1
 -15  17   0 57.9838 8.20586   8
 -15  17   0 53.6858 7.27916   6
  16 -17   0 0.60260 4.07794   1
  16 -17   0 -1.4124 5.92509   7
 -16 -17   0 3.92896 3.73617   1
  16  17   0 6.66024 4.54402   6
  16  17   0 -5.7376 4.31152   7
  16  17   0 -3.5723 3.63477   1
 -16  17   0 4.10687 4.56405   1
 -16  17   0 5.85614 4.26108   2
 -16  17   0 3.99178 5.18599   5
  16  17   0 8.80282 5.41862   4
 -16  17   0 1.93965 4.38125   8
 -16  17   0 0.76230 3.42426   6
  16  17   0 -5.8167 3.64088   8
  17 -17   0 13.3333 7.21233   7
  17 -17   0 10.3833 4.66830   1
 -17  17   0 4.57382 4.38733   2
 -17  17   0 8.16635 5.56056   5
  17  17   0 9.80558 5.07738   6
  17  17   0 -0.6164 4.18020   8
  17  17   0 12.8969 6.13360   4
 -17  17   0 7.81450 4.67067   1
  17  17   0 4.69731 4.15053   1
   0 -18   0 184.831 17.2169   1
   0 -18   0 185.574 16.2380   5
   0 -18   0 174.422 17.1699   8
   0  18   0 187.187 17.1679   1
   0  18   0 168.075 17.2940   2
   0  18   0 175.158 17.3984   4
   0  18   0 159.768 17.3292   8
   0  18   0 183.983 17.2578   1
   0  18   0 178.709 17.3668   8
   0  18   0 144.104 17.2478   6
  -1 -18   0 3.66670 2.91910   1
  -1 -18   0 3.21737 1.64887   5
   1 -18   0 1.75412 2.77133   1
  -1 -18   0 4.28761 2.97691   8
   1 -18   0 4.39464 2.17911   5
   1 -18   0 2.58999 2.86411   8
  -1  18   0 3.89025 3.46164   6
   1  18   0 1.72554 2.90277   8
   1  18   0 3.11737 2.85906   1
   1  18   0 3.00481 3.31099   8
  -1  18   0 1.31224 3.11271   8
  -1  18   0 1.11322 3.10217   1
   1  18   0 0.85209 3.55733   4
   1  18   0 2.96347 3.61792   6
  -1  18   0 0.44680 2.85435   1
   1  18   0 2.53234 3.15428   1
   1  18   0 -2.4222 2.93543   2
  -1  18   0 3.30783 3.66328   4
  -1  18   0 5.98593 3.39126   8
  -1  18   0 1.74485 3.22545   2
  -2 -18   0 21.4353 4.39550   8
   2 -18   0 27.5356 3.89980   5
   2 -18   0 18.2402 4.25726   1
  -2 -18   0 28.5726 2.99168   5
   2 -18   0 21.3108 4.28029   8
  -2 -18   0 24.7532 4.52000   1
  -2  18   0 17.5397 4.69282   4
  -2  18   0 20.8164 4.56773   2
  -2  18   0 25.8825 4.48411   8
  -2  18   0 20.4291 4.53959   8
   2  18   0 15.2045 4.75218   8
   2  18   0 38.0180 4.76791   1
  -2  18   0 22.9133 4.56901   1
  -2  18   0 28.7451 4.61343   1
   2  18   0 20.4323 4.90931   6
   2  18   0 29.2802 4.63559   8
   2  18   0 25.7724 4.49873   2
   2  18   0 26.5370 4.99966   4
   2  18   0 21.2713 4.53475   1
  -2  18   0 16.5152 4.45381   6
  -3 -18   0 120.504 11.2469   5
  -3 -18   0 126.752 13.1978   8
   3 -18   0 110.070 12.7294   1
   3 -18   0 120.878 12.8189   8
  -3 -18   0 134.668 11.3702   5
  -3 -18   0 112.745 12.6472   1
   3 -18   0 129.177 12.1272   5
   3  18   0 107.016 12.9874   1
   3  18   0 122.722 13.0362   2
  -3  18   0 128.394 13.1278   6
  -3  18   0 122.267 13.1386   8
   3  18   0 112.645 12.9479   4
  -3  18   0 132.939 13.2537   8
  -3  18   0 126.694 13.2928   2
   3  18   0 124.209 13.1593   8
  -3  18   0 120.568 12.9813   1
   3  18   0 117.661 12.8684   8
   3  18   0 123.888 13.2297   6
   3  18   0 120.987 12.2040   3
  -4 -18   0 140.396 14.9899   8
  -4 -18   0 164.189 14.9716   1
   4 -18   0 149.098 14.4269   5
   4 -18   0 127.274 14.8983   8
   4 -18   0 160.690 14.9132   1
   4  18   0 170.999 15.4926   4
  -4  18   0 155.262 15.2594   1
  -4  18   0 130.751 15.0009   6
   4  18   0 147.212 15.3081   8
  -4  18   0 150.273 15.3016   8
   4  18   0 153.538 15.5063   6
   4  18   0 170.910 15.2620   1
   4  18   0 153.728 15.4108   8
   4  18   0 152.825 15.0669   2
   4  18   0 148.816 14.2499   3
  -4  18   0 129.403 14.9570   2
  -4  18   0 136.751 15.1791   8
  -5 -18   0 156.328 15.5363   8
  -5 -18   0 164.024 15.4937   1
   5 -18   0 143.813 15.5241   8
   5 -18   0 160.416 15.4220   1
  -5  18   0 156.878 15.8776   8
  -5  18   0 150.328 15.8695   2
  -5  18   0 139.548 15.5375   6
   5  18   0 139.800 15.7207   4
   5  18   0 183.509 16.0142   1
   5  18   0 146.492 14.5957   3
   5  18   0 141.860 15.2029   2
   5  18   0 168.065 15.7614   8
  -5  18   0 176.885 16.0551   1
   5  18   0 144.732 15.8823   6
  -5  18   0 172.818 16.0532   8
   5  18   0 157.011 15.9370   8
   6 -18   0 48.3595 7.40161   8
   6 -18   0 60.1808 7.39588   1
  -6 -18   0 58.0715 7.50577   8
  -6 -18   0 59.3727 7.63766   1
  -6  18   0 55.3540 7.30446   5
   6  18   0 43.0382 5.88811   3
   6  18   0 64.8372 8.82819   8
  -6  18   0 57.8388 7.97635   8
   6  18   0 60.3584 7.72426   8
  -6  18   0 33.5960 6.73113   2
   6  18   0 49.0271 7.36205   2
  -6  18   0 63.0304 8.08835   8
   6  18   0 57.9509 7.78663   1
  -6  18   0 51.1393 8.16994   1
   6  18   0 50.9440 7.90653   4
   6  18   0 48.8567 7.21782   6
  -6  18   0 35.3510 6.62630   6
  -7 -18   0 56.0570 7.61560   1
   7 -18   0 59.1094 7.76596   8
  -7 -18   0 60.7770 7.58572   8
   7 -18   0 57.3317 7.44653   1
  -7  18   0 44.9308 7.38511   5
  -7  18   0 38.3340 6.94696   2
  -7  18   0 45.7478 7.38632   6
   7  18   0 67.2216 8.36339   6
  -7  18   0 44.2838 7.36068   8
   7  18   0 55.6606 8.24394   4
  -7  18   0 42.8415 7.36871   8
   7  18   0 55.8911 5.35274   3
   7  18   0 52.9933 7.77170   8
   7  18   0 69.2437 7.99948   1
  -7  18   0 44.7941 7.03027   1
   7  18   0 60.4022 8.14011   8
  -8 -18   0 110.824 11.5100   8
   8 -18   0 117.848 11.8466   1
  -8 -18   0 116.891 11.4987   1
   8 -18   0 100.916 12.0691   8
   8  18   0 96.5376 11.5657   1
  -8  18   0 107.903 11.8466   6
   8  18   0 120.278 12.0941   8
   8  18   0 92.6288 12.1359   4
  -8  18   0 109.589 12.0812   2
  -8  18   0 94.7265 11.9057   1
  -8  18   0 104.716 12.0183   8
  -8  18   0 97.1164 11.7341   5
   8  18   0 94.5425 12.1491   6
   9 -18   0 136.483 14.6299   1
  -9 -18   0 155.484 14.2756   1
  -9  18   0 133.440 14.8876   2
   9  18   0 157.629 15.3955   4
  -9  18   0 137.614 14.2799   6
  -9  18   0 122.115 14.6006   1
  -9  18   0 143.169 14.9032   8
  -9  18   0 132.091 14.7532   5
   9  18   0 130.864 14.4390   6
 -10 -18   0 -1.7793 3.22347   1
  10 -18   0 1.87345 3.44232   1
 -10  18   0 2.52974 3.79008   8
 -10  18   0 10.0415 4.34577   1
  10  18   0 1.56797 4.36608   8
  10  18   0 7.36947 4.68976   6
  10  18   0 -9.0230 4.67595   7
  10  18   0 -7.7135 4.29651   4
  10  18   0 2.26669 3.79962   1
 -10  18   0 5.01993 4.14149   5
 -10  18   0 -2.4923 2.94048   6
 -10  18   0 -0.4644 3.85169   2
  11 -18   0 19.4840 4.75501   1
 -11 -18   0 23.1437 4.72243   1
  11  18   0 14.4293 5.27021   7
 -11  18   0 19.8216 5.09415   1
  11  18   0 16.7626 5.00770   8
  11  18   0 7.25161 4.30047   1
 -11  18   0 17.5237 4.49832   6
  11  18   0 19.6559 5.48804   6
  11  18   0 17.3397 5.74859   4
 -11  18   0 17.9905 5.09359   8
 -11  18   0 22.1715 5.37757   5
 -11  18   0 20.4317 5.00346   2
 -12 -18   0 -2.3602 3.23914   1
  12 -18   0 -4.1479 5.99144   7
  12 -18   0 -7.9469 3.70503   1
  12  18   0 -2.8367 3.53166   1
  12  18   0 -1.6316 5.11056   4
 -12  18   0 -5.2546 3.75820   1
 -12  18   0 -4.0586 3.69684   2
 -12  18   0 -4.8655 3.28342   6
  12  18   0 4.14135 4.22128   8
  12  18   0 5.77918 5.15660   7
 -12  18   0 -5.7220 3.99656   5
 -12  18   0 -1.4380 4.17324   8
  12  18   0 2.47849 4.79356   6
  13 -18   0 8.18817 4.45640   1
  13 -18   0 10.6280 6.83396   7
 -13 -18   0 14.1103 4.18996   1
  13  18   0 12.5911 4.73105   8
  13  18   0 9.68283 4.11722   1
  13  18   0 17.3070 6.15358   4
 -13  18   0 20.6913 5.18207   1
  13  18   0 17.2055 5.57358   6
 -13  18   0 11.2183 4.71217   2
 -13  18   0 10.0160 4.68906   8
  13  18   0 20.1727 5.80795   7
 -13  18   0 19.7109 4.53515   6
 -13  18   0 24.3324 5.84531   5
  14 -18   0 9.82354 4.56670   1
 -14 -18   0 3.46477 3.65585   1
  14 -18   0 0.93745 6.26638   7
 -14  18   0 1.09625 4.65562   5
 -14  18   0 -1.9751 3.25443   6
  14  18   0 13.6558 5.06235   7
 -14  18   0 13.7704 5.13204   8
  14  18   0 18.4550 5.91685   4
 -14  18   0 7.84546 5.02365   2
  14  18   0 1.84728 3.70458   1
 -14  18   0 1.56901 4.18333   1
  14  18   0 7.17531 5.14362   6
  14  18   0 7.79514 4.64712   8
  15 -18   0 8.90468 7.13995   7
 -15 -18   0 9.23372 4.16314   1
  15 -18   0 12.0242 4.90503   1
  15  18   0 9.63720 4.91154   8
 -15  18   0 18.6189 5.40983   1
 -15  18   0 15.4476 4.41127   6
  15  18   0 14.0862 5.56657   6
 -15  18   0 11.1681 4.88039   8
 -15  18   0 6.16223 5.30984   5
  15  18   0 12.3572 5.11725   7
  15  18   0 3.34784 4.11252   1
 -15  18   0 23.8390 5.33929   2
  15  18   0 26.2076 6.38796   4
  16 -18   0 -3.0696 6.25302   7
  16 -18   0 -6.4996 4.14908   1
  16  18   0 2.76389 4.65094   7
  16  18   0 4.63519 5.42817   4
  16  18   0 -3.6793 4.12041   8
  16  18   0 -4.8541 3.69470   1
  16  18   0 2.25996 4.39103   6
 -16  18   0 -5.2866 3.92072   2
 -16  18   0 3.90003 4.49494   1
 -16  18   0 6.86817 4.79009   8
 -16  18   0 12.6944 5.63810   5
   0 -19   0 -0.5366 2.75985   8
   0 -19   0 -2.1869 2.85685   1
   0 -19   0 -1.7215 1.71321   5
   0  19   0 0.69744 2.77192   6
   0  19   0 -0.1154 3.22162   8
   0  19   0 -0.6415 3.07936   2
   0  19   0 0.46251 3.02721   8
   0  19   0 -0.8198 3.35984   4
   0  19   0 1.66000 3.11193   1
  -1 -19   0 28.1651 4.87460   1
  -1 -19   0 27.4108 4.85936   8
   1 -19   0 33.6307 4.97118   8
   1 -19   0 26.6980 4.76519   1
  -1 -19   0 37.1643 3.73122   5
   1 -19   0 31.0700 4.16910   5
   1  19   0 25.3133 5.08373   8
  -1  19   0 32.6898 5.25544   1
   1  19   0 34.6654 5.26140   8
  -1  19   0 25.6381 5.07688   2
  -1  19   0 32.3958 5.82812   4
  -1  19   0 27.1188 5.12720   8
   1  19   0 38.5064 5.79190   4
   1  19   0 27.4882 5.11912   2
   1  19   0 20.9651 4.79988   1
  -1  19   0 15.8233 4.74198   8
  -1  19   0 28.9703 5.39017   6
   1  19   0 27.3931 5.48154   6
   2 -19   0 7.59547 3.16336   1
  -2 -19   0 10.5979 3.88607   8
  -2 -19   0 14.3925 3.61638   1
   2 -19   0 9.43900 2.74797   5
  -2 -19   0 10.0882 1.69934   5
   2 -19   0 8.67599 3.63748   8
  -2  19   0 7.48788 3.79024   8
  -2  19   0 3.60526 3.60372   8
   2  19   0 7.90606 3.35393   6
  -2  19   0 9.97898 4.07069   4
   2  19   0 15.8277 3.82787   2
  -2  19   0 3.40696 3.56481   2
   2  19   0 11.1171 3.82856   1
  -2  19   0 3.77543 3.80939   6
  -2  19   0 9.55677 3.77749   1
   2  19   0 4.28008 3.70675   8
   2  19   0 8.32396 4.07663   4
   2  19   0 17.0166 3.93976   8
   3 -19   0 29.9865 5.49947   1
  -3 -19   0 45.2654 6.04921   1
  -3 -19   0 43.5180 4.17331   5
   3 -19   0 47.1267 6.51939   8
  -3 -19   0 45.1668 6.73356   8
   3 -19   0 48.1591 5.67081   5
  -3 -19   0 46.5723 4.06200   5
  -3  19   0 36.3799 6.08595   8
   3  19   0 43.8142 6.62665   2
  -3  19   0 33.3311 6.09944   6
  -3  19   0 32.7377 5.97814   8
  -3  19   0 31.9239 5.94138   1
   3  19   0 46.4531 6.64799   8
   3  19   0 35.2148 5.97661   1
   3  19   0 35.7103 6.23442   4
   3  19   0 47.9894 6.70859   8
   3  19   0 45.1350 5.83155   3
  -3  19   0 30.6432 6.01035   2
   3  19   0 28.0335 6.20806   6
   4 -19   0 23.2663 4.74777   8
  -4 -19   0 33.6994 5.33539   8
   4 -19   0 27.9586 4.84402   1
  -4 -19   0 29.7605 5.01582   1
   4  19   0 23.6231 5.15278   1
   4  19   0 40.1853 4.87287   3
  -4  19   0 26.5310 5.35784   2
  -4  19   0 31.4092 5.37586   8
   4  19   0 26.0858 5.08520   6
   4  19   0 31.0051 5.57475   8
   4  19   0 34.0002 5.76793   4
  -4  19   0 29.2876 5.33266   6
   4  19   0 24.6810 4.68036   2
   4  19   0 34.4048 5.24386   8
  -4  19   0 28.2717 5.34594   1
  -4  19   0 23.6501 5.15245   8
   5 -19   0 183.464 17.1992   1
  -5 -19   0 175.423 17.1666   8
   5 -19   0 170.808 17.1336   8
  -5 -19   0 175.671 17.1132   1
   5  19   0 172.144 16.9019   2
   5  19   0 161.435 16.1800   3
   5  19   0 189.060 17.7081   6
  -5  19   0 156.475 17.4752   2
  -5  19   0 156.430 17.1747   6
  -5  19   0 176.987 17.4221   1
   5  19   0 162.902 17.3553   4
  -5  19   0 177.363 17.5089   8
   5  19   0 182.547 17.5924   1
  -5  19   0 166.555 17.4752   8
   5  19   0 178.276 17.4141   8
   5  19   0 182.787 17.6541   8
  -6 -19   0 270.045 24.2790   8
   6 -19   0 250.076 24.1734   1
   6 -19   0 223.680 24.0887   8
  -6 -19   0 258.445 24.0853   1
   6  19   0 292.149 24.6589   1
   6  19   0 222.305 24.4579   6
   6  19   0 233.856 24.4716   4
   6  19   0 262.668 24.1212   2
  -6  19   0 256.890 24.5429   8
   6  19   0 248.847 23.1368   3
  -6  19   0 270.043 24.6808   2
  -6  19   0 283.886 24.5830   1
  -6  19   0 238.037 24.2185   6
   6  19   0 252.187 24.5060   8
  -7 -19   0 146.928 14.3445   1
   7 -19   0 122.014 15.0412   8
   7 -19   0 152.980 14.4502   1
  -7  19   0 158.204 15.0904   8
  -7  19   0 136.212 14.8706   2
   7  19   0 157.288 15.0477   8
   7  19   0 146.574 15.1313   6
  -7  19   0 139.945 15.0470   1
   7  19   0 104.813 14.6389   4
  -7  19   0 138.655 14.5169   5
  -7  19   0 134.724 14.7489   6
   7  19   0 143.441 14.9682   1
  -8 -19   0 0.20690 3.58013   1
   8 -19   0 1.16813 3.51755   1
   8  19   0 2.46530 4.20686   6
  -8  19   0 -4.8365 3.62582   2
  -8  19   0 0.51038 4.13719   5
   8  19   0 -5.4939 3.60597   1
  -8  19   0 2.26169 3.88140   1
   8  19   0 -1.4079 4.51516   4
  -8  19   0 5.90905 4.01812   8
  -8  19   0 3.33250 3.39714   6
   8  19   0 -4.4612 3.90086   8
   9 -19   0 24.4281 5.26989   1
  -9 -19   0 22.7347 4.97774   1
  -9  19   0 29.9753 5.28125   6
  -9  19   0 23.9151 5.03195   2
  -9  19   0 33.6288 6.40521   5
   9  19   0 30.9772 6.07350   6
  -9  19   0 32.2209 5.96375   8
  -9  19   0 29.5185 5.85203   1
   9  19   0 26.7139 6.35572   4
 -10 -19   0 3.10778 3.87931   1
  10 -19   0 6.71431 4.14234   1
 -10  19   0 3.75366 4.34837   5
 -10  19   0 5.34257 4.26604   1
  10  19   0 0.04148 4.35186   8
 -10  19   0 5.83792 4.38005   2
  10  19   0 8.43237 5.53654   7
 -10  19   0 0.52820 4.04363   8
 -10  19   0 8.55773 3.65888   6
  10  19   0 3.22713 4.56447   6
  10  19   0 6.89107 5.16013   4
  10  19   0 3.68984 4.09681   1
 -11 -19   0 17.7792 4.65179   1
  11 -19   0 18.9334 4.96137   1
 -11  19   0 13.0567 5.02383   2
 -11  19   0 22.6318 5.89666   5
  11  19   0 27.8689 6.10646   7
  11  19   0 23.3787 5.51994   8
 -11  19   0 22.5075 5.56873   8
  11  19   0 19.2552 5.86044   6
  11  19   0 15.6720 4.82528   1
  11  19   0 18.0298 6.40709   4
 -11  19   0 17.0288 4.72505   6
 -11  19   0 27.1546 5.55501   1
 -12 -19   0 7.00349 3.98605   1
  12 -19   0 14.1542 4.56315   1
  12  19   0 10.9200 4.36243   6
 -12  19   0 9.67087 4.66209   1
  12  19   0 12.8138 5.78880   4
 -12  19   0 4.40499 4.66758   8
 -12  19   0 12.1898 5.24331   5
 -12  19   0 9.98930 4.59838   2
  12  19   0 4.67083 4.94480   7
  12  19   0 10.4807 4.84532   8
  12  19   0 11.5053 4.40046   1
 -12  19   0 10.4809 4.19563   6
 -13 -19   0 1.62344 3.59286   1
  13 -19   0 4.18643 4.47046   1
  13  19   0 4.77138 4.74459   8
 -13  19   0 5.72858 4.20713   6
 -13  19   0 10.4829 4.58489   2
 -13  19   0 8.38629 5.13970   5
  13  19   0 2.83015 5.28184   7
  13  19   0 5.95359 5.47341   4
 -13  19   0 4.72446 4.80681   8
 -13  19   0 8.97275 4.79670   1
  13  19   0 5.42653 5.23712   6
  13  19   0 1.11875 3.75273   1
  14 -19   0 9.66962 4.83339   1
 -14 -19   0 4.23267 3.73981   1
  14  19   0 15.2195 5.98077   7
  14  19   0 5.27983 4.07832   1
  14  19   0 18.0288 6.17532   4
 -14  19   0 14.2924 5.31100   1
 -14  19   0 3.06841 4.00015   6
  14  19   0 8.49228 5.23066   6
 -14  19   0 11.0550 5.43986   5
 -14  19   0 10.1720 4.87600   2
  14  19   0 12.1303 4.91703   8
 -14  19   0 10.5251 4.99153   8
  15 -19   0 12.4922 4.86745   1
  15 -19   0 10.9231 7.63369   7
 -15  19   0 7.49844 4.16862   6
 -15  19   0 9.27069 4.61359   2
  15  19   0 10.6397 5.24859   6
  15  19   0 7.86045 5.61448   7
  15  19   0 17.9659 6.20060   4
  15  19   0 9.95844 4.61417   1
 -15  19   0 15.1596 5.14397   1
  15  19   0 10.4169 4.92294   8
 -15  19   0 15.1808 5.92602   5
 -15  19   0 10.9838 5.27978   8
  16  19   0 15.8710 5.22605   8
  16  19   0 16.9762 4.97806   1
   0 -20   0 257.455 25.6797   8
   0 -20   0 287.970 24.7594   5
   0 -20   0 265.354 25.6052   1
   0  20   0 253.084 25.8337   4
   0  20   0 268.487 25.8787   2
   0  20   0 274.377 25.9672   8
   0  20   0 283.224 25.9179   1
   0  20   0 276.806 26.0499   6
   0  20   0 263.392 25.8704   8
  -1 -20   0 25.3823 4.58243   1
  -1 -20   0 29.7975 4.79112   8
   1 -20   0 18.0098 4.31927   1
   1 -20   0 20.3286 4.37169   8
   1 -20   0 27.5436 3.69950   5
  -1  20   0 19.7932 4.73598   2
   1  20   0 11.9257 4.70800   4
   1  20   0 29.0236 5.05925   8
   1  20   0 19.7494 5.11943   6
  -1  20   0 17.0950 4.86152   4
  -1  20   0 19.6232 4.36077   6
  -1  20   0 20.1206 4.66748   8
   1  20   0 15.2810 4.43188   8
  -1  20   0 18.9723 4.64447   8
   1  20   0 16.4526 4.43538   2
  -1  20   0 24.0519 4.88953   1
   1  20   0 19.0545 4.61888   1
  -2 -20   0 178.306 17.5273   8
  -2 -20   0 178.330 16.0931   5
   2 -20   0 178.783 16.6066   5
  -2 -20   0 156.852 17.3253   1
   2 -20   0 171.332 17.3122   1
   2 -20   0 166.481 17.3933   8
  -2  20   0 171.556 17.7094   4
  -2  20   0 177.869 17.9164   2
   2  20   0 188.585 17.8936   1
   2  20   0 188.587 17.8498   4
  -2  20   0 173.747 17.8997   1
  -2  20   0 151.279 17.5682   6
   2  20   0 189.490 17.8839   8
   2  20   0 188.751 17.9835   6
   2  20   0 183.609 17.8502   8
  -2  20   0 178.460 17.9138   8
  -2  20   0 173.041 17.7557   8
   2  20   0 177.889 17.5893   2
   3 -20   0 30.6462 4.72536   5
   3 -20   0 23.5746 4.65576   1
   3 -20   0 21.6360 4.53364   8
  -3 -20   0 27.3867 5.04113   8
  -3 -20   0 20.0099 4.76224   1
   3  20   0 36.5494 5.17528   3
   3  20   0 31.6252 5.55872   8
   3  20   0 26.5264 5.58286   6
   3  20   0 27.0909 4.90707   2
   3  20   0 30.7672 5.48088   4
  -3  20   0 26.7514 5.65034   4
  -3  20   0 16.9990 4.91050   8
  -3  20   0 24.8966 5.04722   1
   3  20   0 25.5716 5.17737   1
  -3  20   0 24.1124 5.35090   2
  -3  20   0 23.2808 5.20318   6
   4 -20   0 225.891 21.6985   1
  -4 -20   0 243.093 21.9994   8
   4 -20   0 223.552 21.8123   8
  -4  20   0 236.752 22.2150   8
   4  20   0 238.250 22.3184   8
   4  20   0 228.174 21.8780   2
  -4  20   0 236.201 22.2712   1
   4  20   0 201.837 21.9818   4
   4  20   0 210.744 21.0811   3
  -4  20   0 234.508 22.3016   2
  -4  20   0 206.192 21.9424   6
   4  20   0 229.706 22.3742   6
   4  20   0 243.497 22.2949   1
  -5 -20   0 86.8885 9.61264   1
   5 -20   0 90.8398 10.5540   8
   5 -20   0 63.7408 9.09108   1
  -5  20   0 78.4858 9.70614   6
   5  20   0 70.9302 8.29452   3
  -5  20   0 93.7759 10.5050   2
   5  20   0 73.5570 9.78404   4
   5  20   0 65.4023 9.91631   6
  -5  20   0 84.7385 10.0878   8
   5  20   0 73.2346 10.1997   1
   5  20   0 81.4368 9.63755   2
   5  20   0 95.4933 10.4260   8
  -5  20   0 73.9209 10.1425   1
  -6 -20   0 112.984 10.7923   1
   6 -20   0 103.818 10.6504   1
  -6  20   0 81.4793 11.1517   2
   6  20   0 88.5097 11.2753   1
   6  20   0 92.3237 10.7671   2
   6  20   0 84.9883 9.29544   3
   6  20   0 101.669 11.4010   8
   6  20   0 74.8891 10.9283   4
  -6  20   0 101.105 11.3233   8
  -6  20   0 93.2359 10.7803   6
  -6  20   0 106.752 11.6696   1
   6  20   0 85.4829 11.2527   6
  -7 -20   0 292.928 26.2321   1
   7 -20   0 279.443 26.2637   1
   7  20   0 280.088 26.9284   4
  -7  20   0 270.432 26.5336   8
   7  20   0 257.512 26.2620   1
   7  20   0 312.349 26.9145   6
   7  20   0 265.516 26.4631   8
  -7  20   0 264.831 26.6033   2
  -7  20   0 262.165 26.3673   1
  -7  20   0 265.282 26.2340   6
  -8 -20   0 49.4201 6.92319   1
   8 -20   0 38.1379 6.02147   1
   8  20   0 29.9419 6.47925   6
   8  20   0 38.2121 6.42227   1
  -8  20   0 36.7547 6.41595   2
   8  20   0 39.0384 6.50543   8
  -8  20   0 44.0848 6.70495   1
  -8  20   0 46.8642 6.92473   8
  -8  20   0 31.7389 6.00966   6
   8  20   0 30.5861 6.90893   4
  -8  20   0 38.8852 6.41753   5
  -9 -20   0 76.4028 9.80694   1
   9 -20   0 88.9506 9.79623   1
  -9  20   0 74.1420 9.96431   5
  -9  20   0 75.6292 10.2489   8
   9  20   0 86.9047 10.9492   4
   9  20   0 104.985 10.6541   8
   9  20   0 73.5286 10.6521   6
  -9  20   0 59.2043 9.52688   1
  -9  20   0 76.8290 10.4019   2
  -9  20   0 68.3033 10.0079   6
  10 -20   0 10.9678 4.47033   1
 -10 -20   0 2.56742 3.80705   1
  10  20   0 11.6391 5.75037   7
 -10  20   0 4.61138 4.54838   1
  10  20   0 3.96328 4.45896   8
 -10  20   0 4.24193 3.72181   6
 -10  20   0 6.41540 4.62738   8
 -10  20   0 10.4452 5.10292   5
  10  20   0 13.2642 6.25925   4
 -10  20   0 8.89614 3.77777   2
  10  20   0 10.3894 5.12134   6
  10  20   0 -1.2278 4.19700   1
 -11 -20   0 24.6809 4.99975   1
  11 -20   0 10.9657 4.95140   1
 -11  20   0 13.7596 5.33774   8
  11  20   0 20.4768 6.08019   8
  11  20   0 22.3647 5.94444   7
  11  20   0 18.3330 5.92408   6
  11  20   0 25.7604 6.67644   4
 -11  20   0 16.0523 5.26404   2
 -11  20   0 18.8562 4.66945   6
 -11  20   0 22.3683 6.16723   5
 -11  20   0 30.6302 5.77121   1
  11  20   0 18.1255 4.95702   1
 -12 -20   0 105.270 10.9029   1
  12 -20   0 83.6358 10.9907   1
 -12  20   0 95.8442 12.5201   5
  12  20   0 101.652 11.9617   7
 -12  20   0 93.8541 11.2185   6
 -12  20   0 90.3702 11.9020   8
  12  20   0 109.810 11.8187   8
 -12  20   0 82.4401 11.9882   1
  12  20   0 88.2607 12.1334   6
  12  20   0 80.4714 12.1960   4
  12  20   0 75.8857 11.2072   1
 -12  20   0 88.5468 11.7209   2
 -13 -20   0 33.9732 6.26795   1
  13 -20   0 31.3244 6.48617   1
 -13  20   0 35.7479 6.30438   6
  13  20   0 53.1209 8.16396   7
  13  20   0 33.0793 6.37567   1
 -13  20   0 47.3944 7.20622   2
  13  20   0 41.8034 7.09472   8
  13  20   0 30.4232 7.22256   6
 -13  20   0 42.9801 7.78159   5
 -13  20   0 33.4664 6.92489   1
 -13  20   0 40.9443 7.26170   8
  13  20   0 43.0390 8.03362   4
  14 -20   0 -0.6399 4.29361   1
 -14  20   0 7.24185 4.87562   8
 -14  20   0 1.68980 4.96388   5
  14  20   0 -3.3577 4.63546   6
  14  20   0 9.77387 5.98454   4
 -14  20   0 5.08365 4.47768   2
  14  20   0 -5.1836 4.35903   8
  14  20   0 7.41143 5.31723   7
 -14  20   0 4.64528 4.58498   1
  14  20   0 2.36047 3.85942   1
 -14  20   0 2.38076 3.87689   6
  15  20   0 6.58731 6.35667   4
 -15  20   0 5.93655 6.85966   6
  15  20   0 0.76895 3.93378   1
 -15  20   0 2.65075 4.90351   8
 -15  20   0 0.68701 4.47267   1
  15  20   0 0.06893 4.94510   6
 -15  20   0 6.59019 5.51557   5
 -15  20   0 -3.0699 4.26894   2
  15  20   0 -5.8054 4.16032   8
  15  20   0 -2.2049 5.03159   7
   0 -21   0 -2.3344 3.16274   1
   0  21   0 9.83000 4.40328   6
   0  21   0 -1.8576 3.59555   1
   0  21   0 -2.5908 3.51213   4
   0  21   0 -5.2953 3.45601   8
   0  21   0 -4.0891 3.50018   2
   1 -21   0 0.01423 3.20406   1
  -1 -21   0 -3.1299 3.09188   1
  -1  21   0 -0.3467 3.56131   1
   1  21   0 -2.2373 3.43899   8
  -1  21   0 1.84590 3.66752   8
  -1  21   0 0.90056 3.59967   2
   1  21   0 5.57022 3.63268   2
  -1  21   0 -1.1034 3.93883   6
  -1  21   0 -2.3564 3.61605   4
   1  21   0 -2.6491 4.27676   4
   1  21   0 -1.5568 3.44455   1
   1  21   0 -1.5289 4.04406   6
   2 -21   0 51.2521 6.57257   1
  -2 -21   0 42.2423 5.98594   1
   2  21   0 30.0764 6.31626   6
  -2  21   0 41.8993 6.57125   4
  -2  21   0 29.0631 5.95648   1
  -2  21   0 36.4322 6.22895   6
   2  21   0 41.6510 6.23807   8
  -2  21   0 36.6119 6.26868   2
   2  21   0 37.3209 6.17353   1
  -2  21   0 40.1926 6.08436   8
   2  21   0 32.2351 5.84393   2
   2  21   0 34.2000 6.31398   4
  -3 -21   0 64.9550 8.96679   1
   3 -21   0 71.1109 8.54093   1
  -3  21   0 65.1135 9.44482   2
   3  21   0 64.9178 7.74119   3
  -3  21   0 66.2891 9.16610   8
  -3  21   0 63.6734 8.91010   4
   3  21   0 68.0553 8.81131   2
   3  21   0 61.6091 8.92296   1
  -3  21   0 68.3657 9.02002   1
  -3  21   0 65.4546 9.04094   6
   3  21   0 64.9246 9.36423   6
   3  21   0 77.5129 10.1668   8
   3  21   0 67.2535 8.97457   4
  -4 -21   0 72.6267 9.32369   1
   4 -21   0 73.0658 8.74627   1
  -4  21   0 74.2396 9.67469   8
   4  21   0 70.9410 8.86338   2
   4  21   0 75.6779 8.06005   3
   4  21   0 72.0633 9.35632   1
   4  21   0 53.8104 8.60791   6
  -4  21   0 58.5585 9.09269   6
  -4  21   0 77.8235 9.78135   1
  -4  21   0 76.3187 9.86381   2
   4  21   0 86.6007 9.98754   8
   4  21   0 61.6714 9.31012   4
  -5 -21   0 -2.7369 3.66690   1
   5 -21   0 -2.8507 3.07558   1
   5  21   0 -3.6834 2.45971   3
   5  21   0 -2.0268 3.58001   2
   5  21   0 4.12677 4.26049   4
  -5  21   0 -2.2812 3.67662   6
  -5  21   0 1.17595 4.01782   1
   5  21   0 2.82262 4.22232   1
  -5  21   0 -5.7462 3.73785   8
   5  21   0 0.87763 4.20463   8
   5  21   0 -3.8361 4.01003   6
  -5  21   0 -0.9108 4.01599   2
  -6 -21   0 180.429 18.3521   1
   6 -21   0 184.990 18.5255   1
   6  21   0 185.704 19.0594   6
   6  21   0 197.649 18.5444   2
   6  21   0 214.096 18.9253   1
   6  21   0 158.973 18.7130   4
  -6  21   0 186.303 19.0624   2
  -6  21   0 163.430 18.6795   8
   6  21   0 212.998 19.0527   8
  -6  21   0 182.544 18.7946   1
  -6  21   0 169.456 18.7629   6
  -7 -21   0 42.7464 6.35876   1
   7 -21   0 30.2345 5.83882   1
   7  21   0 31.9555 6.86777   6
  -7  21   0 28.4735 6.36801   2
  -7  21   0 37.0728 6.38902   6
  -7  21   0 48.4823 7.10984   1
   7  21   0 40.2376 7.15063   8
   7  21   0 57.8915 7.85327   1
   7  21   0 56.6757 8.08442   4
  -7  21   0 44.6378 6.98912   8
   8 -21   0 7.27280 4.02369   1
  -8 -21   0 7.42390 4.14011   1
   8  21   0 3.43427 4.62682   8
  -8  21   0 2.76922 4.39615   1
   8  21   0 3.39521 4.88221   4
  -8  21   0 7.69400 4.72403   2
   8  21   0 -1.7913 4.27507   6
  -8  21   0 4.24275 3.97261   6
  -8  21   0 0.27146 4.37481   8
   8  21   0 6.45708 4.62132   1
  -9 -21   0 94.5375 10.9754   1
   9 -21   0 88.7439 10.9521   1
   9  21   0 92.3350 11.7390   8
   9  21   0 81.6314 12.0029   4
  -9  21   0 112.113 12.0499   2
  -9  21   0 101.938 12.2042   1
   9  21   0 77.7936 11.7872   6
  -9  21   0 85.3916 10.9991   6
  -9  21   0 97.2304 11.8954   8
  10 -21   0 89.9384 11.7809   1
 -10 -21   0 102.656 11.6890   1
  10  21   0 110.652 12.3317   8
 -10  21   0 108.369 12.5759   1
 -10  21   0 100.467 12.3312   5
 -10  21   0 109.889 12.7710   2
  10  21   0 121.754 13.1832   6
  10  21   0 104.350 11.9993   1
 -10  21   0 98.5561 12.2524   6
  10  21   0 105.807 12.6308   7
 -10  21   0 103.354 12.5825   8
  10  21   0 92.5268 12.9421   4
 -11 -21   0 33.3290 6.28920   1
  11 -21   0 39.5569 6.70504   1
  11  21   0 48.3630 7.87263   7
  11  21   0 60.2343 8.14286   6
 -11  21   0 38.2750 7.25022   8
  11  21   0 35.0592 7.09097   8
  11  21   0 41.1463 6.75564   1
 -11  21   0 50.6033 7.55941   5
  11  21   0 38.9584 8.15003   4
 -11  21   0 31.7663 7.28434   1
 -11  21   0 39.6381 6.98474   2
 -11  21   0 39.2981 6.38892   6
  12 -21   0 13.8615 4.77955   1
 -12 -21   0 2.30342 3.98567   1
 -12  21   0 6.77357 4.69191   2
  12  21   0 3.01466 4.41161   1
  12  21   0 3.17798 5.54454   4
 -12  21   0 -3.3757 4.58445   5
  12  21   0 1.73589 5.12349   6
  12  21   0 3.91470 4.98942   8
 -12  21   0 7.83574 4.38613   6
  12  21   0 11.1339 5.37538   7
 -12  21   0 3.38487 4.86138   1
 -12  21   0 3.60491 4.68794   8
  13 -21   0 -7.1044 4.90333   1
  13  21   0 -5.8372 5.05212   6
  13  21   0 5.05411 5.21356   7
  13  21   0 -0.6885 4.01762   1
 -13  21   0 0.74398 3.71570   6
  13  21   0 -3.1805 5.19033   8
 -13  21   0 1.77381 4.84870   1
 -13  21   0 0.15169 4.66269   8
 -13  21   0 7.28973 5.23286   5
  13  21   0 -4.3211 5.27860   4
 -13  21   0 3.79619 4.62881   2
 -14  21   0 18.9339 5.81062   2
  14  21   0 33.1412 6.44111   8
 -14  21   0 23.1158 5.40959   6
 -14  21   0 22.6607 5.99098   1
  14  21   0 30.9945 6.52083   7
 -14  21   0 27.1410 6.81052   5
  14  21   0 8.87344 6.22911   6
 -14  21   0 32.2622 6.63888   8
  14  21   0 25.5008 6.96160   4
  14  21   0 20.1320 5.33422   1
   0 -22   0 50.5633 7.24009   1
   0  22   0 39.2141 6.62723   4
   0  22   0 31.5230 6.56467   6
   0  22   0 40.3379 6.57542   8
   0  22   0 39.3550 6.47253   2
   0  22   0 45.6455 6.68369   1
   1 -22   0 23.7942 4.90338   1
  -1 -22   0 21.9787 4.93166   1
   1  22   0 24.1196 5.05702   1
   1  22   0 39.7481 5.83558   8
   1  22   0 22.4086 5.54737   2
  -1  22   0 12.4091 5.11685   6
  -1  22   0 22.3370 5.35193   4
   1  22   0 19.0594 5.63713   6
  -1  22   0 29.1578 5.39947   1
  -1  22   0 25.1167 5.29458   8
   1  22   0 31.7640 5.80930   4
  -1  22   0 21.4726 5.24098   2
  -2 -22   0 156.489 15.7269   1
   2 -22   0 159.278 15.5655   1
  -2  22   0 153.228 15.7390   1
   2  22   0 143.851 15.7002   2
  -2  22   0 128.730 15.5619   4
  -2  22   0 160.375 15.9087   8
   2  22   0 140.524 16.0279   6
   2  22   0 172.751 15.9271   1
   2  22   0 146.816 14.8994   3
  -2  22   0 148.304 16.0179   2
   2  22   0 154.992 15.9710   8
   2  22   0 148.133 15.7176   4
  -2  22   0 144.967 15.7658   6
  -3 -22   0 51.0512 6.66985   1
   3 -22   0 39.3498 5.99543   1
  -3  22   0 35.6630 6.39906   8
   3  22   0 37.8008 6.70045   4
  -3  22   0 35.6261 6.54013   2
  -3  22   0 35.3847 6.68893   4
   3  22   0 47.9975 6.37496   3
   3  22   0 44.4552 6.60808   2
   3  22   0 36.4442 6.73246   8
  -3  22   0 44.5302 6.84993   1
   3  22   0 41.1962 6.79492   1
  -3  22   0 38.9809 6.73479   6
   3  22   0 33.5075 6.89742   6
   4 -22   0 97.6468 11.9669   1
  -4 -22   0 110.238 12.1090   1
  -4  22   0 89.3529 12.3049   6
   4  22   0 102.159 12.4462   4
  -4  22   0 115.457 12.9557   2
   4  22   0 109.678 12.5582   1
   4  22   0 100.705 11.1869   3
   4  22   0 106.604 11.9586   2
  -4  22   0 127.505 12.8639   8
   4  22   0 120.174 12.9880   6
  -4  22   0 118.912 13.0065   1
   4  22   0 121.950 12.8613   8
  -5 -22   0 59.2274 9.40197   1
   5 -22   0 75.3392 9.19966   1
  -5  22   0 68.1019 9.73923   8
  -5  22   0 85.7001 10.2969   2
   5  22   0 63.2800 9.37382   4
   5  22   0 75.7732 9.59556   1
   5  22   0 61.0491 8.78725   2
   5  22   0 87.1222 10.1992   8
  -5  22   0 57.7567 9.23628   6
   5  22   0 54.7455 8.97077   6
  -5  22   0 77.6937 9.67375   1
   6 -22   0 3.14530 3.41137   1
  -6 -22   0 4.96809 4.03093   1
  -6  22   0 7.36530 4.74693   8
   6  22   0 -1.4955 4.46965   4
  -6  22   0 -0.5024 4.45181   6
   6  22   0 3.81498 4.49273   8
   6  22   0 1.42172 3.44171   2
  -6  22   0 -1.6455 4.18054   2
   6  22   0 -2.2491 4.30789   6
   6  22   0 -2.5412 4.22914   1
  -6  22   0 6.48467 4.43504   1
   7 -22   0 1.35325 3.79529   1
  -7 -22   0 -3.1386 3.82253   1
   7  22   0 -0.1135 4.37404   8
   7  22   0 1.73287 4.41060   1
  -7  22   0 4.00798 4.35177   8
   7  22   0 -4.5134 5.17386   4
  -7  22   0 2.69665 4.49201   1
   7  22   0 -3.2247 4.08703   6
  -7  22   0 -2.1080 3.62645   6
  -7  22   0 3.65866 4.29757   2
  -8 -22   0 37.1055 6.19408   1
   8 -22   0 21.5205 5.45507   1
  -8  22   0 38.2271 6.63314   1
   8  22   0 31.5737 6.74210   6
   8  22   0 25.9952 6.75372   4
  -8  22   0 25.3225 6.03829   2
  -8  22   0 39.5298 6.73982   8
   8  22   0 42.9424 6.82508   8
  -8  22   0 32.2741 5.95391   6
   8  22   0 28.0343 6.06945   1
  -9 -22   0 10.5695 4.40651   1
   9 -22   0 2.81121 4.17449   1
  -9  22   0 -0.1731 4.29726   6
  -9  22   0 -6.8997 4.39863   8
  -9  22   0 11.5480 4.21800   2
   9  22   0 16.3950 5.20007   8
   9  22   0 4.86975 5.01943   6
   9  22   0 -0.2209 5.14442   4
  -9  22   0 -3.1078 4.28480   1
 -10 -22   0 1.12665 4.12101   1
  10 -22   0 -1.3636 4.00636   1
  10  22   0 2.32142 4.58954   1
 -10  22   0 2.93365 4.88118   8
 -10  22   0 3.70177 4.04794   6
 -10  22   0 -1.1040 4.31962   2
  10  22   0 -0.0199 5.02641   6
 -10  22   0 -0.8609 4.70663   1
  10  22   0 6.03588 5.75249   4
  11 -22   0 -0.4202 4.09619   1
 -11  22   0 7.46440 4.83741   5
 -11  22   0 -3.6634 4.60731   8
  11  22   0 -5.0645 4.19844   1
  11  22   0 8.05644 6.12191   7
  11  22   0 -6.4987 5.19069   4
  11  22   0 -5.1215 5.04920   6
 -11  22   0 -3.9633 4.07215   2
 -11  22   0 1.99002 4.78134   1
 -11  22   0 -4.2291 4.19589   6
  11  22   0 7.37607 5.36278   8
 -12  22   0 12.7886 5.22711   5
  12  22   0 7.99208 5.22218   8
 -12  22   0 14.1591 4.50443   6
 -12  22   0 5.10136 5.14401   2
 -12  22   0 10.4936 5.29340   1
  12  22   0 13.0006 6.13512   7
  12  22   0 2.71338 5.69341   6
  12  22   0 0.88812 5.66734   4
 -12  22   0 6.52144 5.18059   8
  12  22   0 10.9296 4.52623   1
 -13  22   0 5.46445 4.96253   8
  13  22   0 4.83965 5.51122   7
  13  22   0 7.60564 4.57326   6
 -13  22   0 14.1251 4.48075   6
  13  22   0 5.88953 5.06793   8
 -13  22   0 14.5188 5.51777   1
  13  22   0 8.37641 4.61633   1
  13  22   0 -0.6537 5.85767   4
 -13  22   0 17.5367 5.60423   5
 -13  22   0 4.96519 4.83075   2
   0 -23   0 2.02934 3.66494   1
   0  23   0 -1.7558 3.83021   8
   0  23   0 -3.2803 3.80740   2
   0  23   0 0.23846 4.12395   4
   0  23   0 -1.4303 3.75599   1
   0  23   0 -0.7567 4.35159   6
   1 -23   0 16.8851 4.21247   1
  -1 -23   0 9.79813 4.08087   1
   1  23   0 7.71040 4.61808   4
   1  23   0 6.23128 4.94925   6
   1  23   0 5.34537 4.16221   2
   1  23   0 7.33240 4.24935   1
  -1  23   0 6.12618 4.30187   1
  -1  23   0 3.53761 4.64247   6
  -1  23   0 6.43206 4.61309   2
  -1  23   0 11.3038 4.64264   4
   1  23   0 15.7501 4.68543   8
  -1  23   0 15.3832 4.73981   8
  -2 -23   0 96.7059 11.1416   1
   2 -23   0 93.8234 10.6460   1
   2  23   0 79.7760 11.4460   6
  -2  23   0 89.0365 11.5638   4
  -2  23   0 86.4599 11.3270   6
   2  23   0 90.7870 11.0515   4
   2  23   0 96.4489 10.3384   3
   2  23   0 83.4538 11.2940   8
  -2  23   0 94.3384 11.4106   8
  -2  23   0 81.2972 11.2856   2
  -2  23   0 106.806 11.6589   1
   2  23   0 86.4013 11.0498   2
   2  23   0 86.0940 10.9951   1
   3 -23   0 56.7894 8.18717   1
  -3 -23   0 68.6610 8.70063   1
  -3  23   0 62.4320 9.41598   2
   3  23   0 69.4301 9.12759   1
  -3  23   0 67.9339 9.26517   8
   3  23   0 72.6149 9.43509   8
   3  23   0 49.1248 8.65453   6
   3  23   0 61.1034 7.61912   3
  -3  23   0 66.9296 9.54678   1
  -3  23   0 56.4538 8.88567   6
   3  23   0 52.2052 8.19064   2
  -3  23   0 55.5499 8.80987   4
   3  23   0 60.1621 8.92190   4
   4 -23   0 4.85472 3.77152   1
  -4 -23   0 5.68582 4.40517   1
  -4  23   0 12.4913 4.91508   6
  -4  23   0 22.7794 5.20743   8
   4  23   0 9.11309 4.97028   1
   4  23   0 15.3536 5.11215   8
  -4  23   0 12.9387 5.49834   4
   4  23   0 11.1540 5.08530   4
   4  23   0 12.4188 5.31161   6
  -4  23   0 9.84531 4.89773   2
   4  23   0 17.8288 4.85680   2
  -4  23   0 21.4403 5.33716   1
  -5 -23   0 0.75311 4.11861   1
   5 -23   0 -2.8366 3.58306   1
   5  23   0 -10.622 3.99328   8
  -5  23   0 1.52597 4.17248   6
   5  23   0 -4.8474 4.26249   1
  -5  23   0 7.99290 4.60454   1
  -5  23   0 -1.3449 4.61717   8
   5  23   0 2.29135 4.55615   4
   5  23   0 -3.7842 4.47365   6
   5  23   0 2.77691 3.53043   2
  -5  23   0 -3.2176 4.22044   2
   6 -23   0 38.9018 7.33498   1
  -6 -23   0 76.1123 8.84158   1
  -6  23   0 75.4633 9.98846   1
  -6  23   0 77.2590 9.98306   6
   6  23   0 57.0726 8.75310   6
  -6  23   0 48.6694 8.29277   2
   6  23   0 68.0128 9.23539   4
  -6  23   0 56.4714 8.51282   8
   6  23   0 56.1115 8.65980   8
   6  23   0 64.0675 8.66002   1
   6  23   0 50.7132 7.73275   2
  -7 -23   0 125.111 13.5593   1
   7 -23   0 120.874 13.4805   1
   7  23   0 138.981 14.6333   8
   7  23   0 107.516 14.1298   4
  -7  23   0 132.438 14.6162   6
   7  23   0 118.936 14.4824   6
  -7  23   0 122.697 14.4917   8
  -7  23   0 122.968 14.2603   1
   7  23   0 139.912 14.2971   1
  -7  23   0 126.284 14.7362   2
   8 -23   0 -2.0436 3.72985   1
  -8 -23   0 -2.1640 4.08515   1
  -8  23   0 -3.8244 4.33020   6
  -8  23   0 -5.6078 4.24903   8
   8  23   0 -7.8276 4.54995   6
   8  23   0 -0.5369 4.39677   1
   8  23   0 -3.2450 4.48531   8
   8  23   0 -3.5167 4.87365   4
  -8  23   0 -0.0290 4.54188   1
  -8  23   0 -5.2599 4.39784   2
  -9 -23   0 7.30859 5.11626   1
   9 -23   0 5.19719 4.14406   1
   9  23   0 8.05698 5.46390   6
  -9  23   0 6.95772 5.09254   2
  -9  23   0 16.1426 4.68939   6
   9  23   0 11.4736 5.21209   8
   9  23   0 -3.4247 5.32682   4
  -9  23   0 12.6345 5.39074   1
  -9  23   0 5.93350 4.95946   8
 -10  23   0 14.7765 5.29190   2
 -10  23   0 9.70687 5.31258   1
  10  23   0 2.05836 5.73714   4
 -10  23   0 14.6045 5.47102   8
  10  23   0 9.66454 5.61262   6
 -10  23   0 14.8016 4.73758   6
  10  23   0 6.17021 4.60286   1
 -11  23   0 36.6723 6.44433   6
 -11  23   0 50.6315 7.62694   1
  11  23   0 24.7072 7.17638   6
  11  23   0 42.2912 8.02283   7
  11  23   0 24.0810 6.86192   8
 -11  23   0 37.4051 7.64933   8
  11  23   0 26.6310 6.35876   1
  11  23   0 31.7328 8.31791   4
 -11  23   0 37.2652 7.25137   2
 -12  23   0 2.48339 5.04313   1
 -12  23   0 1.15690 4.89424   2
 -12  23   0 12.6282 6.26004   8
  12  23   0 5.60382 6.18486   4
  12  23   0 0.25972 5.64063   6
  12  23   0 4.42385 4.42278   1
 -12  23   0 6.47708 4.71786   6
  12  23   0 -8.2732 4.52150   8
  12  23   0 4.26099 6.24175   7
   0 -24   0 1.52408 3.62596   1
   0  24   0 -0.6899 3.97506   8
   0  24   0 -4.3867 3.30840   6
   0  24   0 1.11876 4.19128   2
   0  24   0 1.10615 4.06719   1
   0  24   0 -7.1792 4.47824   4
   1 -24   0 43.4543 6.09243   1
  -1 -24   0 33.4116 5.95214   1
   1  24   0 37.4056 6.53715   8
  -1  24   0 30.3192 6.55347   6
  -1  24   0 36.5820 6.46040   1
   1  24   0 29.8809 6.69950   6
  -1  24   0 34.7288 6.38950   4
   1  24   0 34.3448 6.38680   1
   1  24   0 25.5446 5.95120   2
  -1  24   0 35.0598 6.64998   8
  -1  24   0 20.6512 5.95031   2
   1  24   0 33.0085 6.55810   4
   2 -24   0 187.166 18.3002   1
  -2 -24   0 172.050 18.2826   1
   2  24   0 195.757 18.8443   8
  -2  24   0 162.857 18.9766   8
  -2  24   0 159.481 18.4769   6
   2  24   0 162.231 17.4984   3
  -2  24   0 172.955 18.8030   4
   2  24   0 171.982 18.3897   4
  -2  24   0 209.530 18.7684   1
   2  24   0 184.102 18.4881   2
  -2  24   0 170.650 18.6904   2
   2  24   0 200.832 18.8987   1
   2  24   0 192.253 19.0001   6
   3 -24   0 10.9818 4.16238   1
  -3 -24   0 7.26458 4.75200   1
  -3  24   0 8.16544 4.56579   8
  -3  24   0 8.93799 5.01944   2
   3  24   0 13.8703 5.24546   8
  -3  24   0 10.2153 4.67979   1
   3  24   0 6.16722 5.49440   4
   3  24   0 13.1000 5.26222   6
   3  24   0 10.4801 4.89000   2
  -3  24   0 5.26550 4.68208   6
   3  24   0 16.3974 5.11840   1
  -3  24   0 10.6187 5.17494   4
  -4 -24   0 19.1983 5.46965   1
   4 -24   0 20.1503 4.95053   1
   4  24   0 20.8714 6.06200   8
  -4  24   0 25.4649 5.91691   6
  -4  24   0 32.5464 6.23882   1
  -4  24   0 28.7210 6.26459   2
   4  24   0 34.4363 5.88145   2
   4  24   0 31.4961 6.33409   1
  -4  24   0 26.6384 6.09822   4
   4  24   0 26.6281 5.62191   6
   4  24   0 22.4467 5.96491   4
  -4  24   0 24.0922 5.93449   8
  -5 -24   0 47.9876 7.45003   1
   5 -24   0 77.4107 8.50965   1
   5  24   0 45.8643 7.34204   2
   5  24   0 44.5548 7.96222   4
  -5  24   0 40.7547 7.60868   4
   5  24   0 70.4864 9.89478   1
  -5  24   0 52.2963 8.11459   2
   5  24   0 68.4299 9.62642   8
   5  24   0 39.4981 8.07456   6
  -5  24   0 44.9528 8.06622   6
  -5  24   0 37.7211 7.88865   8
  -5  24   0 64.6546 8.99906   1
  -6 -24   0 -2.2253 4.02381   1
   6 -24   0 1.19873 3.57884   1
  -6  24   0 4.42585 4.78685   8
  -6  24   0 10.0857 5.41534   6
   6  24   0 -4.7848 4.62740   8
   6  24   0 -6.3037 3.48774   2
  -6  24   0 1.13636 4.59148   2
   6  24   0 -11.724 4.27511   6
   6  24   0 6.11994 4.96468   1
   6  24   0 0.63593 4.63596   4
  -6  24   0 0.47471 4.55126   1
   7 -24   0 36.7764 6.17455   1
  -7 -24   0 40.3412 9.54667   1
  -7  24   0 33.0359 6.93796   8
   7  24   0 30.8372 7.21835   6
   7  24   0 31.9334 7.22621   4
  -7  24   0 43.8140 7.51787   6
   7  24   0 33.9739 6.75976   1
  -7  24   0 39.2348 7.02819   2
  -7  24   0 37.8146 7.14563   1
   7  24   0 40.8524 7.65481   8
  -8  24   0 -2.4431 4.44741   2
   8  24   0 -1.7697 4.98010   6
  -8  24   0 5.15657 5.05644   8
  -8  24   0 -1.4238 5.11345   1
  -8  24   0 2.35166 4.66222   6
   8  24   0 0.37738 5.43690   4
   8  24   0 -16.074 4.07138   1
   8  24   0 -5.2247 4.70802   8
  -9  24   0 3.45722 4.97966   2
  -9  24   0 5.46842 5.07803   8
  -9  24   0 -2.9878 4.84484   1
   9  24   0 -1.3672 5.33618   4
  -9  24   0 9.30688 4.66732   6
   9  24   0 1.11650 5.01520   8
   9  24   0 2.58640 5.40928   6
 -10  24   0 4.74622 5.45344   8
 -10  24   0 -2.4340 5.01607   1
  10  24   0 -9.1247 4.18848   1
  10  24   0 -3.2853 5.21763   6
 -10  24   0 -4.1780 4.66678   2
  10  24   0 -4.4371 5.40487   4
 -10  24   0 4.17783 4.78812   6
  11  24   0 6.77344 6.25614   7
 -11  24   0 5.89818 4.24150   6
 -11  24   0 14.1861 5.82923   8
  11  24   0 5.85529 4.62979   1
 -11  24   0 5.77612 5.19966   2
 -11  24   0 12.2200 5.30972   1
  11  24   0 -5.4052 5.61188   8
  11  24   0 -3.0562 5.57513   6
  11  24   0 -2.9088 5.79240   4
   0 -25   0 4.50662 3.89970   1
   0  25   0 -4.3973 4.14001   1
   0  25   0 4.88862 4.52972   2
   0  25   0 4.31511 4.48202   8
   0  25   0 -6.7396 4.34920   6
   0  25   0 -10.569 3.71652   4
   1 -25   0 27.1016 5.30416   1
  -1 -25   0 26.6509 5.57306   1
   1  25   0 31.5274 6.16514   8
  -1  25   0 26.7073 6.55784   4
  -1  25   0 22.5676 5.72733   2
   1  25   0 29.5520 6.53767   6
   1  25   0 17.8438 6.03608   1
   1  25   0 31.5520 6.21928   2
  -1  25   0 29.1367 6.10718   8
   1  25   0 30.2947 6.70895   4
  -1  25   0 30.8145 6.45053   1
  -1  25   0 17.0030 6.11997   6
   1  25   0 28.2204 5.20271   3
  -2 -25   0 21.9144 5.17745   1
   2 -25   0 18.2140 4.56550   1
   2  25   0 12.2277 4.86959   2
   2  25   0 16.9491 5.57914   1
   2  25   0 16.9017 5.43802   4
  -2  25   0 11.7551 5.12445   8
  -2  25   0 8.99584 5.36009   6
  -2  25   0 14.2696 5.03407   4
   2  25   0 13.6807 5.75639   6
  -2  25   0 10.8620 5.27674   2
   2  25   0 15.2995 5.30349   8
  -2  25   0 19.3600 5.47795   1
  -3 -25   0 17.6451 5.77532   1
   3 -25   0 26.3936 5.05281   1
   3  25   0 12.0362 5.30290   1
  -3  25   0 13.6063 5.17223   8
  -3  25   0 6.95446 5.02647   6
   3  25   0 20.7432 5.61625   4
   3  25   0 15.6934 5.78093   6
   3  25   0 17.4624 5.33292   2
  -3  25   0 17.1819 5.48523   4
   3  25   0 14.7738 5.50950   8
  -3  25   0 9.73448 5.40988   2
  -3  25   0 8.64667 4.90244   1
   4 -25   0 26.8692 5.79172   1
   4  25   0 20.6565 5.26952   2
  -4  25   0 17.1804 5.62156   6
   4  25   0 22.5983 6.22819   6
   4  25   0 30.6097 6.41384   8
   4  25   0 27.0483 6.07194   4
  -4  25   0 20.6826 5.93340   2
   4  25   0 21.2510 5.88418   1
  -4  25   0 21.6322 5.79552   8
  -4  25   0 21.2262 5.94200   4
  -4  25   0 17.0479 5.70303   1
   5  25   0 0.59872 5.83898   8
  -5  25   0 1.93501 4.71380   1
  -5  25   0 0.58709 4.77354   4
  -5  25   0 12.3878 4.81779   6
  -5  25   0 10.2725 5.57366   8
   5  25   0 7.20289 5.40047   6
  -5  25   0 3.28643 4.84811   2
   5  25   0 -4.5291 4.44949   1
   5  25   0 -2.9438 4.72011   4
   5  25   0 2.24978 4.00316   2
   6  25   0 32.0037 6.47380   1
  -6  25   0 32.0659 6.48791   8
  -6  25   0 21.8153 6.16433   2
  -6  25   0 20.4408 5.82135   6
   6  25   0 32.7256 7.07408   6
  -6  25   0 18.6050 5.84294   4
   6  25   0 19.3164 6.71305   8
   6  25   0 23.3993 5.74493   2
  -6  25   0 31.5045 6.43972   1
   6  25   0 23.7617 6.41688   4
   7  25   0 25.0314 6.57711   6
  -7  25   0 31.8549 6.69683   8
  -7  25   0 18.5276 6.44761   6
  -7  25   0 25.0084 6.42321   2
   7  25   0 25.3829 6.80004   4
  -7  25   0 32.9457 6.58736   1
   7  25   0 24.6670 6.46791   8
   7  25   0 31.1700 6.68316   1
   8  25   0 -1.9819 5.27243   4
  -8  25   0 10.1099 5.39091   1
  -8  25   0 7.25036 5.15800   2
  -8  25   0 7.25862 5.81006   8
   8  25   0 8.70598 5.34553   1
   8  25   0 7.51454 5.69175   8
   8  25   0 -1.3253 3.92473   6
  -8  25   0 7.04683 4.88859   6
  -9  25   0 42.6002 7.21226   1
   9  25   0 35.0818 7.50160   6
  -9  25   0 29.9377 7.17856   8
   9  25   0 30.1722 6.78675   8
   9  25   0 21.9673 7.25927   4
  -9  25   0 23.0472 6.24729   6
  -9  25   0 37.1130 7.21875   2
   0  26   0 7.25147 4.96657   8
   0  26   0 -2.6267 4.96943   2
   0  26   0 -5.1385 5.25672   4
   0  26   0 -4.8923 4.57492   6
   0  26   0 2.24568 4.44490   1
   1  26   0 1.96854 5.00549   1
  -1  26   0 8.54174 4.87124   1
  -1  26   0 1.20384 4.70751   2
  -1  26   0 3.10798 4.98740   4
  -1  26   0 7.94904 4.86674   8
   1  26   0 6.53729 4.95092   8
  -1  26   0 1.69209 4.97493   6
   1  26   0 2.77381 4.92420   6
   1  26   0 3.07259 4.40536   2
   1  26   0 6.66542 4.91231   4
  -2  26   0 -3.9290 4.33557   4
  -2  26   0 4.94789 4.39804   8
  -2  26   0 -4.0287 4.51112   2
   2  26   0 1.08630 4.63707   4
   2  26   0 -0.4751 5.26846   6
   2  26   0 -10.794 4.24332   1
   2  26   0 -4.1297 4.53413   8
   2  26   0 -4.5362 4.20764   2
  -2  26   0 0.58812 4.46067   1
   3  26   0 2.12854 4.84175   4
  -3  26   0 3.69382 4.72863   4
   3  26   0 0.84858 4.73867   2
  -3  26   0 5.15304 5.23362   2
  -3  26   0 4.68218 5.04029   6
   3  26   0 -0.1781 3.89906   6
   3  26   0 1.60899 4.97091   1
  -3  26   0 2.17011 4.61442   1
  -3  26   0 16.3258 5.30757   8
   3  26   0 0.59436 5.08756   8
  -4  26   0 -1.8510 4.34550   1
   4  26   0 0.54465 4.27028   2
   4  26   0 11.2439 5.96280   4
   4  26   0 10.3104 5.54889   8
   4  26   0 -0.1527 4.90917   1
   4  26   0 4.29890 5.28906   6
  -4  26   0 1.98201 4.83579   6
  -4  26   0 10.0674 4.88588   8
  -4  26   0 3.74632 4.99561   4
  -4  26   0 5.21562 5.05600   2
   5  26   0 -6.1685 3.71094   2
   5  26   0 -0.2726 5.28322   6
   5  26   0 1.57499 5.32609   8
  -5  26   0 0.39868 5.47956   4
   5  26   0 -6.8585 4.60016   4
  -5  26   0 -15.979 3.84703   6
  -5  26   0 6.55816 5.01601   1
  -5  26   0 -1.7863 4.63463   2
   5  26   0 -8.8961 4.68808   1
  -5  26   0 -0.4711 4.65326   8
   6  26   0 -0.4437 5.13334   4
  -6  26   0 12.3633 5.31178   4
  -6  26   0 -1.0748 4.57314   6
  -6  26   0 6.67130 5.36832   2
   6  26   0 -1.1343 5.06877   6
  -6  26   0 10.3398 5.60560   8
   6  26   0 8.65828 5.45724   1
   6  26   0 0.69874 5.36845   8
   6  26   0 -7.0539 3.69921   2
  -6  26   0 4.40205 5.24638   1
  -7  26   0 -0.2293 5.05032   2
   7  26   0 -1.5363 5.22377   6
   7  26   0 9.63220 5.88219   4
  -7  26   0 2.55594 5.36162   6
  -7  26   0 7.27451 5.11375   1
   7  26   0 9.77512 5.60803   8
   7  26   0 2.31554 5.27193   1
  -7  26   0 8.75170 5.29202   8
   8  26   0 6.35801 6.00924   6
  -8  26   0 25.5022 6.17325   8
  -8  26   0 21.1509 5.89939   1
   8  26   0 4.93942 6.67816   4
  -8  26   0 19.9478 5.55565   6
   8  26   0 7.73415 5.36681   1
  -8  26   0 7.40698 5.71583   2
   8  26   0 1.25989 5.49034   8
   0  27   0 0.36849 4.62318   8
   0  27   0 -1.8696 5.12287   6
   0  27   0 5.83527 4.76281   1
   0  27   0 -1.9894 4.72185   4
   0  27   0 -7.7874 4.49831   2
  -1  27   0 13.5959 5.92473   6
   1  27   0 11.0610 5.28335   1
  -1  27   0 5.32362 4.95938   1
  -1  27   0 6.12033 4.86369   8
  -1  27   0 8.76583 5.62051   2
   1  27   0 17.5811 5.67636   8
   1  27   0 4.37232 5.35004   2
   1  27   0 10.7652 5.36853   4
  -1  27   0 5.46028 5.12711   4
   1  27   0 5.46859 5.37706   6
  -2  27   0 35.8941 6.57496   1
   2  27   0 24.3141 6.86795   6
   2  27   0 15.6102 6.06403   4
  -2  27   0 23.3499 6.15686   4
  -2  27   0 20.9471 6.39069   6
  -2  27   0 23.3351 6.15528   8
  -2  27   0 17.9131 5.98689   2
   2  27   0 37.4084 6.90720   8
   2  27   0 18.3685 6.15817   2
   2  27   0 27.9384 6.41676   1
  -3  27   0 7.58618 5.40620   4
   3  27   0 6.73019 5.87932   6
   3  27   0 7.47178 5.37885   2
  -3  27   0 0.89466 5.20740   6
  -3  27   0 10.4792 5.24611   1
   3  27   0 0.69422 5.15709   4
   3  27   0 5.03783 5.45861   1
  -3  27   0 11.6924 5.40907   8
  -3  27   0 15.0489 5.83927   2
   3  27   0 12.8823 5.88820   8
  -4  27   0 0.80453 5.02628   2
   4  27   0 -1.7653 5.44354   4
  -4  27   0 8.40985 4.86857   1
   4  27   0 1.01505 5.04398   1
   4  27   0 -2.3496 4.33354   2
  -4  27   0 9.07008 5.30277   4
   4  27   0 22.3803 5.98544   8
   4  27   0 0.08704 5.42490   6
  -4  27   0 8.13805 5.32380   8
  -4  27   0 3.04356 5.16161   6
   5  27   0 -4.9948 3.89490   2
   5  27   0 -5.2465 5.83947   4
   5  27   0 14.0162 6.41997   8
  -5  27   0 -0.7384 4.70621   8
   5  27   0 -4.0885 3.48770   6
  -5  27   0 4.73703 4.93423   1
   5  27   0 -3.1210 4.67338   1
  -5  27   0 -8.0562 5.13207   4
  -5  27   0 -3.6396 4.51999   6
  -5  27   0 3.92834 5.28549   2
  -6  27   0 -5.1388 4.66842   8
   6  27   0 -2.9922 5.41248   6
   6  27   0 -6.4828 5.02043   1
  -6  27   0 0.80437 5.25427   1
  -6  27   0 -5.6043 4.45060   6
   0  28   0 14.7253 5.83902   2
   0  28   0 29.6576 7.20334   4
   0  28   0 30.2650 6.64747   1
   0  28   0 15.1315 5.80825   8
   0  28   0 36.3428 6.95547   6
   1  28   0 24.7696 7.00476   6
  -1  28   0 32.1038 7.04336   6
   1  28   0 26.5831 6.70854   1
  -1  28   0 26.4877 7.11881   4
  -1  28   0 34.2562 6.91795   1
   1  28   0 19.7028 6.14476   2
   1  28   0 28.8919 7.13804   4
  -1  28   0 21.8506 6.47238   2
  -1  28   0 23.9364 6.57122   8
   1  28   0 37.8635 6.96808   8
   2  28   0 1.75844 5.86607   6
  -2  28   0 15.7335 5.81675   1
   2  28   0 6.21633 5.60311   1
   2  28   0 13.0913 5.59013   2
  -2  28   0 3.77961 5.59842   6
 -21   0   1 -2.5756 4.63007   5
 -21   0   1 1.12920 3.19503   1
  21   0  -1 3.86075 4.30955   7
  21   0  -1 2.24381 4.04217   1
  21   0  -1 8.53090 5.80463   4
 -20   0   1 1.81153 3.14015   1
  20   0  -1 3.08416 4.18440   7
 -20   0   1 -1.6155 4.45631   5
  20   0  -1 4.47029 5.41715   4
  20   0  -1 -3.7816 3.23880   1
 -19   0   1 1.11734 3.03715   1
  19   0  -1 -0.1325 3.80865   7
  19   0  -1 2.49401 3.71150   8
 -19   0   1 -5.2939 4.17028   5
  19   0  -1 1.94300 4.91324   4
  19   0  -1 2.12915 3.42110   1
  18   0  -1 -4.4354 4.65602   4
  18   0  -1 -0.0676 3.23757   1
 -18   0   1 3.14762 2.40671   2
  18   0  -1 -2.1302 3.49292   7
 -18   0   1 -0.6164 2.94917   8
 -18   0   1 2.48334 2.92198   1
 -18   0   1 -3.1051 4.00020   5
  18   0  -1 -3.6326 3.47929   8
 -17   0   1 2.33818 2.16828   2
  17   0  -1 -1.8447 4.40251   4
 -17   0   1 1.10212 2.60609   1
 -17   0   1 8.81543 4.13170   5
 -17   0   1 -0.8870 2.76843   8
  17   0  -1 3.71060 3.47805   8
  17   0  -1 4.73669 3.28423   1
  17   0  -1 0.90666 3.36944   7
 -16   0   1 -1.2557 2.07837   2
 -16   0   1 5.97233 2.95448   8
 -16   0   1 3.53544 2.68953   1
  16   0  -1 -1.4209 3.18646   8
  16   0  -1 -0.5096 3.33411   4
  16   0  -1 2.85162 3.42773   7
  16   0  -1 0.71371 2.86506   1
 -16   0   1 -0.5544 3.71599   5
 -15   0   1 -0.8317 2.35573   1
  15   0  -1 -4.8513 2.47193   8
  15   0  -1 -1.6309 2.66415   1
 -15   0   1 0.99945 2.09102   2
  15   0  -1 -1.6136 4.02874   4
  15   0  -1 1.25426 3.19548   7
 -15   0   1 -0.6609 3.22789   5
 -15   0   1 -3.2662 2.54506   8
  15   0  -1 -3.2946 2.86614   8
 -14   0   1 -2.6908 2.14762   1
  14   0  -1 -1.5397 2.67124   8
 -14   0   1 0.35233 3.20487   5
  14   0  -1 -3.0289 2.40158   8
 -14   0   1 -0.9931 1.91486   2
  14   0  -1 -2.7685 2.48570   1
  14   0  -1 -0.6135 3.04836   7
 -14   0   1 -1.6613 2.14966   8
  14   0  -1 -0.9364 3.58836   4
  13   0  -1 0.48830 2.95985   7
  13   0  -1 -1.2426 2.47018   8
  13   0  -1 1.67782 2.77464   8
 -13   0   1 -1.3975 2.21690   8
 -13   0   1 2.55077 1.81685   2
 -13   0   1 -2.8125 1.99874   6
 -13   0   1 -1.0794 2.33288   8
 -13   0   1 -2.2748 2.94879   5
  13   0  -1 2.87126 2.53597   1
  13   0  -1 -3.4948 3.38390   4
 -13   0   1 2.10798 2.30982   1
  12   0  -1 -0.0345 2.29581   8
 -12   0   1 -0.6325 1.56737   2
  12   0  -1 -1.6586 3.17290   4
  12   0  -1 -1.3936 1.69981   8
 -12   0   1 -0.9571 2.28962   8
 -12   0   1 -1.2939 2.03246   1
  12   0  -1 -2.2783 2.68916   7
 -12   0   1 -2.3387 1.74770   6
 -12   0   1 -2.7298 1.99143   8
 -12   0   1 0.44178 2.76793   5
  12   0  -1 -4.0297 2.06095   1
  11   0  -1 -0.6187 2.49362   8
  11   0  -1 -3.2487 2.02710   1
 -11   0   1 -5.5036 1.80734   6
  11   0  -1 -2.6660 2.24805   1
  11   0  -1 -0.4774 2.64865   7
 -11   0   1 -1.5064 1.50004   2
 -11   0   1 -4.2101 2.59826   7
 -11   0   1 0.59639 1.94829   1
  11   0  -1 -3.7204 2.93202   4
 -11   0   1 -3.5754 1.81177   8
 -11   0   1 -3.1464 1.99957   8
 -11   0   1 1.57653 2.68690   5
  11   0  -1 1.49389 2.31218   8
 -10   0   1 -0.5365 2.42128   5
 -10   0   1 -0.1907 1.47285   2
  10   0  -1 -3.5958 1.88290   1
  10   0  -1 -0.1310 2.28010   8
  10   0  -1 0.09156 2.06574   8
  10   0  -1 1.27865 2.10249   1
 -10   0   1 2.29127 1.90007   1
 -10   0   1 0.89478 2.33089   7
 -10   0   1 -0.7955 1.99494   1
  10   0  -1 0.78349 2.28928   4
 -10   0   1 -1.0782 1.52708   8
  10   0  -1 -0.3143 2.49479   7
 -10   0   1 2.38038 2.13447   8
 -10   0   1 0.08150 1.94942   6
  10   0  -1 0.73300 2.36467   5
  -9   0   1 -0.9599 1.43507   2
  -9   0   1 -0.7599 1.52847   6
  -9   0   1 1.65407 2.50078   7
   9   0  -1 -2.1614 1.83148   8
  -9   0   1 -0.2279 1.94556   8
  -9   0   1 -2.9011 1.72936   1
   9   0  -1 0.69006 1.76369   1
   9   0  -1 -1.0968 1.21915   2
   9   0  -1 -1.5322 2.67223   4
   9   0  -1 -0.5469 1.70564   8
  -9   0   1 2.11278 2.46626   5
  -9   0   1 2.33780 1.97179   1
  -9   0   1 0.31799 1.77532   8
   9   0  -1 -0.4205 2.25395   5
  -9   0   1 2.02991 2.79318   4
   9   0  -1 -1.9582 2.73150   7
   9   0  -1 -1.9825 1.96271   1
  -8   0   1 0.11673 2.43604   4
  -8   0   1 0.88984 1.80123   1
  -8   0   1 1.41264 1.34019   2
   8   0  -1 -1.1514 1.39456   8
   8   0  -1 -4.3517 1.94932   8
  -8   0   1 -0.6378 1.79872   8
  -8   0   1 1.55728 2.20631   7
   8   0  -1 -2.9534 2.16589   7
   8   0  -1 1.34585 2.26039   5
   8   0  -1 -1.7702 1.08803   2
   8   0  -1 0.33023 1.72405   1
  -8   0   1 -1.1754 1.57794   6
  -8   0   1 1.13716 1.76024   1
   8   0  -1 -0.2175 2.00908   1
   8   0  -1 0.32993 2.62661   4
  -8   0   1 -1.1617 1.83532   8
  -8   0   1 1.71203 2.19972   5
   7   0  -1 0.32409 1.17565   2
   7   0  -1 -0.1536 1.64017   1
   7   0  -1 -1.6147 2.21391   7
   7   0  -1 -0.0725 1.89773   8
  -7   0   1 -0.4640 1.67183   1
  -7   0   1 2.03486 2.01600   5
   7   0  -1 -3.4019 2.29757   4
  -7   0   1 -0.4036 1.60560   8
  -7   0   1 -3.7049 1.87468   7
   7   0  -1 2.35826 1.71818   8
   7   0  -1 2.31466 2.02338   5
  -7   0   1 0.42043 1.63457   1
  -7   0   1 0.33111 1.32159   6
  -7   0   1 1.48701 1.78527   8
  -7   0   1 0.25252 1.21635   2
  -7   0   1 -2.1657 2.24891   4
   7   0  -1 -3.7275 1.74823   1
  -6   0   1 -3.4440 1.55975   1
   6   0  -1 1.12009 1.11145   2
   6   0  -1 -0.5534 1.25602   8
   6   0  -1 -3.5969 1.54126   1
   6   0  -1 -1.1043 1.64958   8
  -6   0   1 -2.7291 1.52892   8
  -6   0   1 1.48878 1.98894   7
   6   0  -1 -1.3577 1.76898   5
   6   0  -1 -2.6657 1.50827   1
  -6   0   1 -2.4308 1.29752   6
   6   0  -1 -2.0051 1.64520   4
  -6   0   1 -2.4756 1.47263   1
  -6   0   1 -1.3344 1.37465   5
   6   0  -1 -1.7807 2.13103   7
  -6   0   1 -1.0876 1.16551   2
  -6   0   1 -3.4168 2.06122   4
  -6   0   1 0.03020 1.17027   8
   5   0  -1 0.13674 1.55776   1
   5   0  -1 1.99629 1.61134   8
   5   0  -1 -1.6499 1.92439   7
   5   0  -1 1.02633 1.80103   5
  -5   0   1 -2.8125 2.06150   4
  -5   0   1 1.85083 1.54063   1
  -5   0   1 -0.8790 2.14944   7
  -5   0   1 -1.5156 1.39403   8
  -5   0   1 0.45893 1.09596   2
   5   0  -1 2.16068 1.46461   1
  -5   0   1 -0.5458 1.50873   8
  -5   0   1 0.06931 1.33372   1
   5   0  -1 -2.4173 1.42530   8
  -5   0   1 -0.2284 1.73662   5
   5   0  -1 -3.1372 2.13725   4
  -5   0   1 -0.7135 1.10694   6
   5   0  -1 -0.1314 0.95373   2
  -4   0   1 -0.1929 1.04611   6
  -4   0   1 -0.1847 1.21331   8
   4   0  -1 -1.1357 1.37893   8
  -4   0   1 1.05767 0.91392   2
   4   0  -1 -0.8567 1.87332   4
  -4   0   1 -0.2484 1.16819   1
  -4   0   1 0.85083 1.84787   4
   4   0  -1 0.13103 0.88635   2
   4   0  -1 2.57046 1.33987   1
  -4   0   1 -0.2201 1.70551   7
  -4   0   1 0.40125 1.15641   5
  -4   0   1 -1.5107 1.31817   8
   4   0  -1 0.81535 1.31570   1
   4   0  -1 -2.0975 1.64633   7
  -4   0   1 -1.4890 1.19301   1
   4   0  -1 -0.4241 1.55120   5
   4   0  -1 -0.2023 1.24347   8
  -3   0   1 -0.1699 1.05129   8
  -3   0   1 0.79764 1.39844   7
   3   0  -1 0.10501 0.96510   1
  -3   0   1 -0.2124 0.86521   1
  -3   0   1 -1.4882 1.15282   5
  -3   0   1 -0.9036 0.89138   8
   3   0  -1 0.93188 1.37530   7
   3   0  -1 1.34981 1.42034   4
   3   0  -1 1.31636 1.24977   5
   3   0  -1 1.47070 1.04266   8
   3   0  -1 -0.1636 0.93285   8
  -3   0   1 1.70208 1.02538   1
  -3   0   1 -0.3873 0.73698   6
  -3   0   1 -0.8959 1.31273   4
  -3   0   1 0.40972 0.63804   2
   3   0  -1 -0.4869 0.64847   2
   3   0  -1 2.04517 0.98529   1
   2   0  -1 1.03086 0.62553   1
   2   0  -1 0.20641 0.53560   6
   2   0  -1 0.18359 0.90675   7
  -2   0   1 -0.8405 0.95083   7
  -2   0   1 0.03575 0.36948   2
  -2   0   1 -0.3244 0.64814   4
  -2   0   1 -0.8881 0.73301   8
  -2   0   1 0.46406 0.76980   5
   2   0  -1 -0.6977 0.62194   8
   2   0  -1 1.08663 0.86185   5
   2   0  -1 0.30908 0.44687   2
  -2   0   1 0.03214 0.46286   6
  -2   0   1 -1.4271 0.64284   1
  -2   0   1 -0.5186 0.50564   1
   2   0  -1 -0.3008 0.62327   1
   2   0  -1 0.48679 0.68018   8
   2   0  -1 0.29312 0.85331   4
  -1   0   1 -0.0758 0.31630   1
  -1   0   1 0.43833 0.30864   8
   1   0  -1 -0.2985 0.29319   8
  -1   0   1 -0.4697 0.78767   7
   1   0  -1 -0.0621 0.43985   5
   1   0  -1 0.09580 0.29085   1
   1   0  -1 -0.1471 0.36092   4
  -1   0  -1 0.14031 0.45529   7
   1   0   1 -0.1659 0.45145   8
  -1   0  -1 -0.6190 0.44537   1
   1   0   1 0.18954 0.41847   1
   1   0   1 0.05435 0.73428   5
  -1   0  -1 0.58685 0.40156   1
  -1   0  -1 0.10416 0.56945   8
  -1   0  -1 0.68070 0.54679   4
  -1   0  -1 -0.5613 0.54673   5
  -2   0  -1 0.93559 0.87631   1
  -2   0  -1 0.57884 0.71400   8
  -2   0  -1 -0.0332 0.70812   1
   2   0   1 -1.0235 1.02737   5
  -2   0  -1 1.18697 0.69839   8
   2   0   1 -0.4946 0.81002   8
  -2   0  -1 -0.3256 0.96998   5
   2   0   1 -2.4256 1.07602   4
   2   0   1 0.11446 0.73890   1
  -2   0  -1 0.87711 0.66434   2
  -2   0  -1 -0.8629 0.88041   7
  -2   0  -1 -0.2471 1.10636   4
   2   0   1 -0.2899 0.78000   8
   2   0   1 -0.5816 0.81146   1
   2   0   1 -0.3424 0.84729   7
  -3   0  -1 -0.3379 1.58729   4
  -3   0  -1 -0.2557 0.94663   2
  -3   0  -1 0.74978 1.50853   5
  -3   0  -1 0.07991 1.21772   8
   3   0   1 0.30793 1.03265   1
   3   0   1 0.71226 1.04888   1
   3   0   1 0.98782 1.13293   7
   3   0   1 0.54553 1.14254   8
  -3   0  -1 -0.2977 1.23238   1
   3   0   1 0.01321 0.96219   8
   3   0   1 -2.4490 1.39326   5
   3   0   1 -0.8873 1.15740   4
  -3   0  -1 -1.1132 1.02796   1
  -3   0  -1 1.72541 1.32267   7
  -3   0  -1 -0.2957 0.98706   8
   4   0   1 -3.7767 1.33586   4
  -4   0  -1 -4.1270 1.28587   1
  -4   0  -1 -0.6090 1.23155   2
   4   0   1 -0.9314 1.28671   1
   4   0   1 0.65510 1.42357   8
   4   0   1 1.27671 1.50459   7
  -4   0  -1 -0.7728 1.44932   8
  -4   0  -1 -3.3665 1.74446   5
  -4   0  -1 -0.0977 1.39185   8
  -4   0  -1 0.88467 1.32337   1
  -4   0  -1 0.44512 1.68954   7
   4   0   1 -0.9314 1.32251   8
   4   0   1 -1.3533 1.44850   1
   4   0   1 -1.6588 1.72773   5
  -4   0  -1 -3.4631 1.81480   4
   5   0   1 -2.2339 1.80071   7
  -5   0  -1 1.97632 1.30421   2
  -5   0  -1 -1.8494 1.77850   7
  -5   0  -1 0.04582 1.54774   1
   5   0   1 2.03766 1.66156   8
  -5   0  -1 -0.6051 1.32765   1
  -5   0  -1 0.19364 1.60513   8
   5   0   1 2.51354 1.59719   1
  -5   0  -1 -0.1694 1.92406   5
  -5   0  -1 -1.6508 1.36083   8
   5   0   1 -0.0379 2.14683   4
   5   0   1 -1.9313 1.81588   5
   5   0   1 -0.5031 1.40050   1
  -5   0  -1 -2.3279 1.52035   4
   5   0   1 0.81213 1.48922   8
  -6   0  -1 1.31557 1.68230   8
   6   0   1 -1.6966 1.87251   5
  -6   0  -1 0.00195 2.15638   4
   6   0   1 -0.1232 1.42526   8
  -6   0  -1 -0.5147 1.97616   5
  -6   0  -1 0.23710 1.35770   2
   6   0   1 0.15842 1.75009   7
  -6   0  -1 0.15003 1.85771   7
   6   0   1 -1.7047 1.49546   8
  -6   0  -1 -3.4162 1.50132   1
   6   0   1 0.74995 2.21887   4
   6   0   1 -2.0329 1.42217   1
  -6   0  -1 2.08522 1.55895   1
  -6   0  -1 1.60863 1.63556   6
   6   0   1 -1.9897 1.57862   1
  -6   0  -1 -1.4212 1.48514   8
  -7   0  -1 -0.1730 1.65160   8
   7   0   1 -1.3028 1.29191   8
   7   0   1 -0.0589 2.03830   5
  -7   0  -1 -1.7516 1.50573   1
  -7   0  -1 0.59697 2.38761   4
  -7   0  -1 -0.3033 1.70278   5
  -7   0  -1 0.66560 1.33146   2
  -7   0  -1 -2.4312 1.77176   7
   7   0   1 -1.5185 1.96793   8
  -7   0  -1 -0.5667 1.76215   1
   7   0   1 -1.5137 1.56847   1
   7   0   1 -3.1262 2.05123   7
  -7   0  -1 -2.0620 1.68279   6
  -7   0  -1 2.07285 1.88695   8
   7   0   1 -1.2909 1.87986   1
   7   0   1 0.96282 2.48299   4
  -8   0  -1 -1.9807 1.80000   1
  -8   0  -1 -0.5916 1.91169   7
   8   0   1 -1.0732 1.93901   1
  -8   0  -1 1.29479 2.61274   4
   8   0   1 -3.3177 1.91671   8
   8   0   1 -0.7398 1.80424   1
  -8   0  -1 0.35762 2.39797   5
  -8   0  -1 0.25530 1.48192   2
  -8   0  -1 -2.3815 1.85885   8
   8   0   1 -2.8024 2.27490   7
  -8   0  -1 -5.8094 1.90382   6
   8   0   1 1.03398 2.27696   5
   8   0   1 0.08392 1.45794   8
  -8   0  -1 -2.7271 1.85121   1
  -8   0  -1 -3.0838 1.67655   8
   8   0   1 -5.5355 2.58275   4
  -9   0  -1 -1.7455 2.40718   5
  -9   0  -1 -2.0089 2.22552   7
  -9   0  -1 0.88413 2.04976   4
  -9   0  -1 0.02405 1.82724   6
   9   0   1 -3.4908 1.92609   8
   9   0   1 -3.1523 1.97390   1
  -9   0  -1 -6.0578 1.66259   1
   9   0   1 0.38655 2.22901   7
  -9   0  -1 -4.0176 1.90353   8
   9   0   1 -2.2619 1.61861   8
  -9   0  -1 -1.4739 1.86859   8
  -9   0  -1 0.19007 1.61643   2
   9   0   1 -3.5313 2.88706   4
  -9   0  -1 -0.5847 1.97717   1
   9   0   1 1.48908 2.42923   5
   9   0   1 -2.2609 1.85075   1
  10   0   1 -3.5108 2.13603   1
  10   0   1 -1.6168 2.30114   8
  10   0   1 1.94626 2.24198   8
  10   0   1 -4.3354 2.55124   7
 -10   0  -1 -1.6116 1.86632   6
 -10   0  -1 0.12295 2.46416   7
 -10   0  -1 -1.4444 1.78426   1
  10   0   1 -3.2378 2.04289   1
 -10   0  -1 -4.1372 2.02784   1
 -10   0  -1 1.27442 2.05352   8
  10   0   1 -2.1169 2.95321   4
 -10   0  -1 -0.8331 2.11179   8
 -10   0  -1 -0.9298 1.59202   2
 -10   0  -1 -2.8776 2.56990   5
 -11   0  -1 -0.5353 1.68885   2
 -11   0  -1 -3.5712 1.67990   6
 -11   0  -1 -0.1363 2.80352   5
  11   0   1 -2.1833 2.02870   1
 -11   0  -1 -0.3295 1.93601   1
  11   0   1 -2.0682 3.06018   4
  11   0   1 -5.0458 2.00333   8
 -11   0  -1 -2.4990 2.46199   7
  11   0   1 -3.0091 2.22038   7
 -11   0  -1 0.57087 1.96331   8
 -11   0  -1 -1.1943 2.13244   8
  11   0   1 -2.7424 2.18769   8
 -12   0  -1 0.73817 3.02508   5
  12   0   1 0.62896 2.64582   8
  12   0   1 0.02077 2.24660   8
  12   0   1 -2.5960 2.67337   7
  12   0   1 0.15063 2.48534   4
 -12   0  -1 -1.5211 1.66746   8
 -12   0  -1 -1.7956 2.06232   8
 -12   0  -1 3.68098 2.23883   1
 -12   0  -1 1.05651 1.77045   2
  12   0   1 -3.4486 2.26438   1
 -13   0  -1 -1.1939 2.18679   1
 -13   0  -1 0.02508 1.81016   2
  13   0   1 -1.6027 2.56018   8
 -13   0  -1 -1.7575 2.34494   8
  13   0   1 -3.9169 2.47147   8
  13   0   1 -5.1425 3.34133   4
  13   0   1 -4.3467 2.34202   1
 -13   0  -1 -2.3107 2.37125   8
  13   0   1 -0.7956 3.00397   7
 -13   0  -1 -0.8739 3.20226   5
 -14   0  -1 -2.5632 2.37991   8
  14   0   1 -0.0006 2.92719   8
  14   0   1 -1.6047 2.65160   7
  14   0   1 1.07484 3.82349   4
 -14   0  -1 4.32029 3.60143   5
 -14   0  -1 1.24361 2.09040   2
 -14   0  -1 0.78063 1.94132   8
  14   0   1 7.05560 2.88621   1
 -14   0  -1 -0.7148 2.42204   1
 -15   0  -1 0.35525 3.49408   5
 -15   0  -1 0.81359 2.17742   2
  15   0   1 0.93439 3.26418   4
  15   0   1 -3.0295 2.99991   8
 -15   0  -1 1.71820 2.50486   1
  15   0   1 -3.7285 2.87258   7
 -15   0  -1 1.38763 2.70328   8
  15   0   1 -0.3485 2.81621   1
 -16   0  -1 -0.0049 2.73897   8
 -16   0  -1 -1.0618 3.54206   5
 -16   0  -1 2.74393 2.71907   1
  16   0   1 -2.0538 3.10580   8
  16   0   1 -1.5605 2.65788   1
  16   0   1 2.31306 3.20256   7
  16   0   1 1.28211 4.37935   4
 -16   0  -1 -1.0582 2.28062   2
 -17   0  -1 -1.1421 2.34621   2
  17   0   1 4.05946 4.69377   4
 -17   0  -1 -2.1128 2.84438   5
 -17   0  -1 -1.6503 2.67849   1
  17   0   1 -3.6364 3.23220   8
  17   0   1 2.26511 3.77647   7
 -17   0  -1 1.81339 2.87151   8
  17   0   1 -2.2730 3.04988   1
  18   0   1 -5.3780 2.87833   1
  18   0   1 -0.6927 3.84064   7
 -18   0  -1 -0.4377 2.88956   1
  18   0   1 -11.018 4.19855   4
 -18   0  -1 -2.6407 3.17562   8
 -18   0  -1 -3.4036 2.31737   2
  18   0   1 2.46403 4.10868   8
 -18   0  -1 -3.9111 4.02318   5
 -19   0  -1 -0.2597 3.04478   1
  19   0   1 3.04327 3.66530   1
  19   0   1 1.64079 5.02421   4
 -19   0  -1 -5.7258 4.20457   5
  19   0   1 0.90856 3.90872   7
 -20   0  -1 -6.2898 2.65468   1
  20   0   1 4.28548 5.53015   4
  20   0   1 -1.0966 3.94318   7
 -20   0  -1 0.11144 4.59745   5
  20   0   1 2.22259 3.83799   1
  21   0   1 0.18809 3.83576   1
  21   0   1 3.05739 4.59364   7
  21   0   1 -1.5384 5.80373   4
 -21   0  -1 -4.2993 4.34144   5
 -21   0  -1 -0.1866 3.30113   1
 -21  -1   1 3.71242 5.11082   5
  21  -1  -1 -2.6816 5.30350   4
 -21  -1   1 -1.3824 3.18173   1
  21  -1  -1 -1.6408 4.55562   7
  21  -1  -1 -5.5189 3.54435   1
 -21   1   1 1.66260 4.77820   5
  21   1  -1 -2.7209 3.84342   4
  21   1  -1 8.56002 4.92456   7
 -21   1   1 0.66195 3.37560   1
  21   1  -1 4.03659 3.98438   1
  20  -1  -1 3.13993 4.42724   7
 -20  -1   1 3.07706 4.43676   5
 -20  -1   1 6.78926 3.39412   1
  20  -1  -1 7.48577 4.60587   4
  20  -1  -1 6.97427 3.87501   1
  20   1  -1 15.6898 5.91134   4
  20   1  -1 3.17625 3.73529   1
  20   1  -1 11.7984 4.37992   7
 -20   1   1 1.46059 4.71465   5
 -20   1   1 8.18820 3.61814   1
  19  -1  -1 -1.3841 5.07547   4
 -19  -1   1 0.92045 4.00434   5
  19  -1  -1 -5.4316 3.33468   1
  19  -1  -1 -0.0309 3.61986   8
 -19  -1   1 5.20220 3.15658   1
  19  -1  -1 6.28932 3.92081   7
  19   1  -1 8.63730 5.48064   4
  19   1  -1 5.31867 4.03025   8
  19   1  -1 3.30235 3.23632   1
  19   1  -1 -3.0425 3.42554   7
 -19   1   1 -1.8672 2.84162   1
 -19   1   1 3.85259 4.47877   5
 -18  -1   1 6.20355 2.62530   2
  18  -1  -1 3.60920 3.78168   8
  18  -1  -1 1.05821 3.83179   4
  18  -1  -1 6.75589 3.94081   7
 -18  -1   1 2.53598 4.08223   5
  18  -1  -1 0.44607 3.36364   1
 -18  -1   1 4.63841 3.12731   1
 -18  -1   1 5.81606 3.49105   8
 -18   1   1 5.02942 3.34945   8
  18   1  -1 4.01313 3.37703   1
  18   1  -1 0.77720 3.98718   7
 -18   1   1 2.23014 2.28790   2
 -18   1   1 4.21347 4.52366   5
  18   1  -1 2.70559 4.91346   4
  18   1  -1 1.64932 3.55083   8
 -18   1   1 4.80460 3.12594   1
  17  -1  -1 0.19876 3.65594   7
 -17  -1   1 2.42898 2.97977   8
 -17  -1   1 2.24705 3.95248   5
 -17  -1   1 -3.9800 2.42082   1
  17  -1  -1 -3.9860 4.39333   4
  17  -1  -1 -1.3666 3.11729   1
  17  -1  -1 -1.8247 3.41046   8
 -17  -1   1 2.37561 2.15704   2
 -17   1   1 2.82475 2.71704   1
 -17   1   1 12.2576 4.60619   5
  17   1  -1 1.39041 3.34243   8
 -17   1   1 5.22278 2.50348   2
  17   1  -1 -3.3718 3.79331   7
  17   1  -1 -3.0732 3.19291   4
 -17   1   1 7.18357 3.17967   8
  17   1  -1 -0.0288 3.11741   1
  16  -1  -1 131.401 14.2768   7
 -16  -1   1 148.516 14.2267   5
 -16  -1   1 163.220 13.3042   2
 -16  -1   1 130.375 13.7538   1
  16  -1  -1 141.374 14.6141   4
 -16  -1   1 143.359 14.0007   8
  16  -1  -1 137.582 14.2194   8
  16  -1  -1 129.812 14.0204   1
 -16   1   1 139.081 13.9971   8
  16   1  -1 134.537 14.9626   4
 -16   1   1 167.307 14.9665   5
  16   1  -1 111.906 13.7838   1
 -16   1   1 169.894 13.5407   2
 -16   1   1 111.942 13.8204   1
  16   1  -1 128.924 14.1515   7
  16   1  -1 128.320 14.2100   8
  16   1  -1 107.355 13.8804   8
 -15  -1   1 104.204 10.7078   5
 -15  -1   1 95.7836 10.0487   1
 -15  -1   1 82.0648 9.90820   8
 -15  -1   1 108.876 9.34987   2
  15  -1  -1 96.3325 10.8069   7
  15  -1  -1 79.7800 9.94300   8
  15  -1  -1 80.2218 9.99989   1
  15  -1  -1 96.1295 9.97106   8
  15  -1  -1 84.5477 11.1174   4
  15   1  -1 77.6382 10.1853   8
  15   1  -1 90.6680 11.0848   4
  15   1  -1 67.5424 9.83082   1
 -15   1   1 93.5602 10.0580   8
  15   1  -1 89.2498 10.0376   8
 -15   1   1 119.535 11.0576   5
  15   1  -1 91.8898 10.3932   7
 -15   1   1 104.798 9.43143   2
 -15   1   1 83.2764 9.85175   1
  14  -1  -1 0.98715 3.09142   7
  14  -1  -1 1.23457 2.68056   1
 -14  -1   1 -0.1117 3.06078   5
  14  -1  -1 4.99325 2.79631   8
 -14  -1   1 1.63560 2.49844   8
  14  -1  -1 -3.0600 2.66370   8
  14  -1  -1 1.21098 3.78860   4
 -14  -1   1 4.52715 1.95834   2
 -14  -1   1 4.41868 2.44755   1
 -14   1   1 0.39719 3.26622   5
  14   1  -1 -0.0344 3.85757   4
  14   1  -1 1.93629 2.82962   8
  14   1  -1 3.57319 2.70361   8
 -14   1   1 2.98101 2.00938   2
  14   1  -1 2.76073 2.70906   1
  14   1  -1 -0.4975 3.40086   7
 -14   1   1 2.40614 2.79048   8
 -14   1   1 1.38201 2.54177   8
 -14   1   1 4.60004 2.56452   1
 -13  -1   1 127.289 12.2521   6
  13  -1  -1 134.148 13.2967   4
  13  -1  -1 125.635 12.8165   7
 -13  -1   1 146.858 11.8643   2
 -13  -1   1 134.347 12.8789   5
  13  -1  -1 117.990 12.5235   8
  13  -1  -1 124.052 12.3360   8
 -13  -1   1 103.667 12.1248   1
 -13  -1   1 121.633 12.3977   8
  13  -1  -1 110.577 12.3235   1
 -13  -1   1 103.019 12.2040   8
 -13   1   1 113.837 12.2254   1
 -13   1   1 120.841 12.3844   8
  13   1  -1 127.410 13.1740   4
  13   1  -1 118.157 12.6594   7
 -13   1   1 143.672 13.0830   5
  13   1  -1 115.738 12.4898   8
 -13   1   1 145.745 12.0149   2
 -13   1   1 115.301 12.2588   8
  13   1  -1 116.707 12.3162   8
 -13   1   1 145.908 12.3325   6
  13   1  -1 105.232 12.3710   1
  12  -1  -1 19.1503 3.74370   1
 -12  -1   1 27.2362 4.46011   5
 -12  -1   1 22.5592 3.79514   8
  12  -1  -1 21.3618 3.88475   8
  12  -1  -1 26.2505 4.67585   7
 -12  -1   1 20.9239 3.67801   8
  12  -1  -1 27.9329 3.96036   8
 -12  -1   1 22.8568 3.64751   1
  12  -1  -1 18.7785 2.98408   2
  12  -1  -1 28.2102 5.05415   4
 -12  -1   1 32.8290 3.51062   2
 -12  -1   1 23.1236 3.81979   6
 -12   1   1 28.1213 4.01518   8
  12   1  -1 27.1888 4.35214   7
  12   1  -1 22.3329 3.85332   1
 -12   1   1 25.5344 4.52665   5
  12   1  -1 22.1324 4.84927   4
  12   1  -1 16.7111 3.83286   8
 -12   1   1 21.0783 3.63743   1
 -12   1   1 23.6224 3.66633   2
 -12   1   1 24.6542 3.78263   8
  12   1  -1 25.1455 3.85596   8
 -12   1   1 26.1832 3.71164   6
 -11  -1   1 115.380 12.1521   1
  11  -1  -1 119.381 12.1563   1
  11  -1  -1 112.949 12.5472   7
  11  -1  -1 113.427 12.2636   1
  11  -1  -1 122.361 12.4196   8
  11  -1  -1 123.861 12.6313   4
  11  -1  -1 147.432 11.8353   2
 -11  -1   1 130.674 12.6320   5
 -11  -1   1 125.992 12.1318   8
 -11  -1   1 129.051 11.8232   2
  11  -1  -1 122.591 12.2318   8
 -11  -1   1 135.343 12.3187   6
 -11  -1   1 114.829 12.1909   8
 -11   1   1 140.477 12.0626   6
 -11   1   1 125.872 12.7176   5
 -11   1   1 120.121 12.1692   1
  11   1  -1 126.298 12.2301   1
 -11   1   1 122.444 12.2784   8
  11   1  -1 120.942 12.3625   8
  11   1  -1 132.681 12.2932   8
  11   1  -1 121.500 12.5849   7
 -11   1   1 122.726 12.4291   7
  11   1  -1 130.157 13.0033   4
 -11   1   1 122.427 12.2635   8
  11   1  -1 116.651 12.2649   1
 -11   1   1 132.704 11.9470   2
 -10  -1   1 38.3393 5.17564   8
 -10  -1   1 40.9919 5.73760   7
 -10  -1   1 38.2391 5.14627   6
 -10  -1   1 46.2509 4.61749   2
 -10  -1   1 39.8493 5.19072   8
  10  -1  -1 40.3693 5.29201   1
 -10  -1   1 42.0649 5.12260   1
  10  -1  -1 38.5018 5.20913   8
  10  -1  -1 40.1493 5.59764   7
  10  -1  -1 36.4783 5.70847   4
 -10  -1   1 38.0497 5.49294   5
  10  -1  -1 46.5727 5.50852   8
  10  -1  -1 44.5542 5.11928   1
 -10  -1   1 38.5653 4.99654   1
  10  -1  -1 36.1943 5.44748   5
  10  -1  -1 35.4232 4.45345   2
 -10   1   1 43.1840 5.07878   1
  10   1  -1 41.4688 5.70759   7
 -10   1   1 41.9497 5.15875   8
  10   1  -1 42.8024 5.27673   8
  10   1  -1 35.0082 6.01658   4
 -10   1   1 43.3957 4.95369   6
 -10   1   1 38.1976 5.13695   8
 -10   1   1 42.6632 5.28774   1
  10   1  -1 42.0667 5.05101   1
  10   1  -1 40.2819 5.03457   5
 -10   1   1 44.8459 4.94992   2
 -10   1   1 47.8764 5.79723   5
  10   1  -1 42.3239 5.47855   8
  10   1  -1 37.1011 5.43941   1
 -10   1   1 50.0097 5.65058   7
   9  -1  -1 1.09159 2.11749   8
   9  -1  -1 5.85383 3.02569   4
   9  -1  -1 2.82751 2.48582   5
  -9  -1   1 3.57284 2.02787   8
  -9  -1   1 2.44029 2.30593   5
   9  -1  -1 0.18680 1.45602   2
  -9  -1   1 4.33839 3.01031   4
  -9  -1   1 7.69561 1.88182   8
   9  -1  -1 3.90028 2.13804   1
  -9  -1   1 2.93800 2.11250   6
   9  -1  -1 2.95434 2.66114   7
  -9  -1   1 2.59786 2.23182   7
   9  -1  -1 1.08661 2.11275   1
   9  -1  -1 2.72655 2.22074   8
  -9  -1   1 3.83462 1.98291   1
  -9  -1   1 2.00785 1.99042   1
  -9  -1   1 5.62629 1.56382   2
   9   1  -1 3.27829 2.44169   4
  -9   1   1 1.51641 2.79430   7
  -9   1   1 4.14009 2.63774   5
  -9   1   1 2.26449 2.05155   1
  -9   1   1 6.43339 2.88237   4
  -9   1   1 4.70941 2.27373   8
  -9   1   1 4.68443 2.07775   1
   9   1  -1 3.55588 2.04430   1
  -9   1   1 6.20875 1.71104   2
   9   1  -1 5.52493 2.76407   7
  -9   1   1 5.49069 1.90973   6
   9   1  -1 5.25918 1.96294   5
   9   1  -1 4.94900 2.43174   8
   9   1  -1 2.07718 2.13940   1
   9   1  -1 3.17735 2.04916   8
  -9   1   1 2.40412 2.06363   8
  -8  -1   1 34.3650 4.47932   5
   8  -1  -1 25.5203 4.39399   4
   8  -1  -1 29.0420 4.12025   1
  -8  -1   1 26.2552 3.99000   1
   8  -1  -1 28.7462 4.27740   7
   8  -1  -1 34.3496 4.51670   8
  -8  -1   1 27.9809 4.22221   4
   8  -1  -1 36.8370 4.34578   1
  -8  -1   1 31.2882 4.39094   7
  -8  -1   1 30.9456 3.90471   6
  -8  -1   1 31.8317 3.60682   2
  -8  -1   1 30.2187 4.23116   8
  -8  -1   1 31.0240 4.14625   1
   8  -1  -1 35.7454 4.31138   8
   8  -1  -1 35.8777 3.73787   2
  -8  -1   1 33.0807 4.22535   8
   8  -1  -1 37.9752 4.61171   5
   8   1  -1 31.6898 4.27202   1
   8   1  -1 24.1457 4.45121   4
   8   1  -1 28.3028 4.11464   5
   8   1  -1 23.8949 3.90185   8
   8   1  -1 31.3419 4.10852   1
  -8   1   1 28.4495 3.71500   6
  -8   1   1 33.8845 4.35616   8
  -8   1   1 28.1746 4.18858   7
   8   1  -1 36.5024 4.22611   8
  -8   1   1 33.0094 3.79545   2
  -8   1   1 32.2347 4.86771   4
  -8   1   1 27.1459 4.56103   5
  -8   1   1 29.2772 4.08991   1
  -8   1   1 32.3516 4.16724   1
   8   1  -1 24.8724 4.16720   7
  -8   1   1 25.0067 4.09944   8
  -7  -1   1 32.6701 4.51110   5
  -7  -1   1 30.2367 4.06557   6
  -7  -1   1 35.3841 4.38240   1
   7  -1  -1 38.0651 4.61376   8
   7  -1  -1 32.6793 4.53613   5
   7  -1  -1 36.6347 4.30560   1
   7  -1  -1 33.9979 4.07365   8
  -7  -1   1 32.2448 3.78868   2
   7  -1  -1 35.7832 4.93838   4
  -7  -1   1 38.5465 4.33710   8
  -7  -1   1 38.8714 4.56313   7
   7  -1  -1 29.1352 4.31384   1
  -7  -1   1 35.8076 4.39993   8
   7  -1  -1 33.7658 5.27595   7
  -7  -1   1 31.2777 4.38315   4
   7  -1  -1 29.6220 3.88533   2
  -7  -1   1 39.0132 4.31076   1
  -7   1   1 33.9033 3.95999   2
   7   1  -1 34.8755 5.10258   4
   7   1  -1 36.7662 4.56399   5
   7   1  -1 34.0866 4.51737   1
  -7   1   1 27.5851 4.60954   7
   7   1  -1 40.7933 4.34000   8
  -7   1   1 45.2899 4.57220   8
  -7   1   1 34.7000 3.94992   6
  -7   1   1 32.7043 4.29041   8
  -7   1   1 41.4466 4.48905   4
  -7   1   1 34.0254 4.31681   1
  -7   1   1 33.7247 4.23671   5
   7   1  -1 35.6701 4.79358   7
  -7   1   1 35.1292 4.29292   1
   7   1  -1 37.9268 4.34510   1
   7   1  -1 38.1394 4.61430   8
   6  -1  -1 557.424 49.7474   7
  -6  -1   1 597.949 49.5832   8
  -6  -1   1 555.279 49.6113   7
  -6  -1   1 521.662 49.5119   6
  -6  -1   1 499.940 49.3193   2
   6  -1  -1 619.116 49.6010   8
   6  -1  -1 552.500 49.7216   5
   6  -1  -1 512.810 49.4028   2
  -6  -1   1 553.598 49.5214   1
  -6  -1   1 574.600 49.5389   1
  -6  -1   1 580.504 49.5607   8
   6  -1  -1 566.057 49.5631   1
  -6  -1   1 533.778 49.6176   5
   6  -1  -1 582.298 49.6031   8
   6  -1  -1 594.012 49.5546   1
   6  -1  -1 509.034 49.7577   4
  -6  -1   1 536.259 49.7826   4
  -6   1   1 582.216 49.5860   8
  -6   1   1 574.656 49.5446   1
  -6   1   1 573.765 49.5640   1
  -6   1   1 530.795 49.6736   5
   6   1  -1 590.900 49.5838   1
   6   1  -1 612.275 49.6295   8
  -6   1   1 522.584 49.7694   4
   6   1  -1 549.830 49.6591   5
  -6   1   1 521.680 49.4170   2
   6   1  -1 517.306 49.7897   4
   6   1  -1 469.212 49.5864   7
  -6   1   1 466.897 49.5893   7
   6   1  -1 611.251 49.5790   8
   6   1  -1 613.919 49.5645   1
  -6   1   1 558.292 49.5734   8
   5  -1  -1 203.562 16.1499   1
   5  -1  -1 176.178 16.2662   5
  -5  -1   1 196.451 16.1409   8
   5  -1  -1 156.930 15.9125   2
  -5  -1   1 176.357 16.1158   8
   5  -1  -1 151.289 16.2631   7
   5  -1  -1 158.806 16.3360   4
  -5  -1   1 167.529 16.0797   6
   5  -1  -1 190.809 16.1859   8
  -5  -1   1 166.040 16.4083   4
  -5  -1   1 163.156 15.8581   2
  -5  -1   1 191.174 16.0990   1
  -5  -1   1 182.088 16.0738   1
  -5  -1   1 169.425 16.1959   7
  -5  -1   1 164.831 16.1728   5
   5  -1  -1 197.715 16.1682   8
   5  -1  -1 188.061 16.1441   1
   5   1  -1 191.163 16.1048   1
  -5   1   1 198.865 16.1419   1
  -5   1   1 188.996 16.1493   8
   5   1  -1 174.197 16.2421   7
  -5   1   1 160.100 16.1558   5
   5   1  -1 153.965 16.3801   4
   5   1  -1 178.758 16.0560   8
  -5   1   1 164.512 15.9797   2
   5   1  -1 171.810 16.1824   5
  -5   1   1 194.607 16.1161   1
   5   1  -1 181.957 16.1607   8
  -5   1   1 188.719 16.1794   8
  -5   1   1 176.536 16.3017   7
  -5   1   1 150.997 16.3168   4
   5   1  -1 167.477 16.0545   6
   5   1  -1 190.822 16.1252   1
  -4  -1   1 1141.95 108.817   5
  -4  -1   1 1125.35 108.738   6
  -4  -1   1 1084.53 108.800   7
   4  -1  -1 1302.26 108.794   1
  -4  -1   1 1244.31 108.782   8
  -4  -1   1 1295.66 108.780   1
  -4  -1   1 1318.29 108.788   8
  -4  -1   1 1122.35 108.725   2
  -4  -1   1 1177.33 108.924   4
   4  -1  -1 1375.48 108.803   1
   4  -1  -1 1131.36 108.891   4
   4  -1  -1 1189.25 108.891   5
   4  -1  -1 1111.88 108.691   2
   4  -1  -1 1334.04 108.819   8
  -4  -1   1 1301.71 108.770   1
   4  -1  -1 1369.41 108.818   8
   4   1  -1 1327.64 108.778   1
   4   1  -1 1200.43 108.831   5
   4   1  -1 1271.79 108.802   8
   4   1  -1 1316.92 108.795   8
  -4   1   1 1133.22 108.866   5
  -4   1   1 1301.58 108.794   1
   4   1  -1 1272.80 108.777   1
  -4   1   1 1177.41 108.712   2
  -4   1   1 1094.88 108.878   4
  -4   1   1 1320.75 108.892   7
  -4   1   1 1114.14 108.781   8
  -4   1   1 1323.80 108.809   8
  -4   1   1 1292.81 108.785   1
   4   1  -1 1112.79 108.742   6
   4   1  -1 1054.46 108.873   4
   3  -1  -1 42.4041 3.97833   1
  -3  -1   1 41.0526 3.92815   8
  -3  -1   1 41.5675 4.17135   7
   3  -1  -1 38.8135 4.13236   5
   3  -1  -1 39.4463 4.26268   7
   3  -1  -1 41.1238 3.99732   1
   3  -1  -1 46.8029 4.07004   8
  -3  -1   1 34.2325 3.62902   2
  -3  -1   1 36.3974 3.89511   6
  -3  -1   1 43.5337 3.93610   1
   3  -1  -1 38.6733 4.00228   8
  -3  -1   1 43.1520 3.99899   8
  -3  -1   1 40.8742 3.88360   1
  -3  -1   1 39.3314 4.29169   4
  -3  -1   1 37.2183 4.03113   5
   3  -1  -1 37.5053 3.96933   4
   3  -1  -1 37.6517 3.87255   2
  -3   1   1 41.2525 4.07119   8
  -3   1   1 40.9246 3.97113   1
  -3   1   1 37.2674 3.86869   8
  -3   1   1 46.8899 4.37171   7
   3   1  -1 44.9766 3.96516   1
   3   1  -1 39.2006 3.99519   8
  -3   1   1 33.0379 3.83435   2
  -3   1   1 42.1381 4.20388   4
   3   1  -1 31.0114 4.06951   7
   3   1  -1 39.9433 4.26138   4
  -3   1   1 38.2122 3.95261   1
   3   1  -1 40.7345 3.99145   5
   3   1  -1 39.1398 3.87590   6
   3   1  -1 40.5174 3.93629   8
   3   1  -1 37.7338 3.91287   1
  -3   1   1 35.8655 3.95892   5
  -2  -1   1 39.9446 4.28456   7
  -2  -1   1 43.3325 4.09184   1
   2  -1  -1 49.1184 4.22532   1
   2  -1  -1 38.4002 4.22047   4
  -2  -1   1 47.2271 4.15687   1
   2  -1  -1 38.3436 4.33432   7
  -2  -1   1 41.7464 4.11234   5
   2  -1  -1 41.6395 4.28334   5
   2  -1  -1 48.5665 4.17797   1
  -2  -1   1 43.4782 4.15358   8
   2  -1  -1 42.3823 4.11486   2
  -2  -1   1 41.5671 4.09198   6
   2  -1  -1 39.1493 4.20796   8
   2  -1  -1 51.8414 4.21073   8
  -2  -1   1 42.0049 4.32738   4
   2   1  -1 47.6837 4.13570   1
   2   1  -1 44.6631 4.33445   4
  -2   1   1 43.6389 4.10023   2
  -2   1   1 48.9159 4.16384   1
  -2   1   1 40.1415 4.21491   4
  -2   1   1 39.0615 4.19492   5
   2   1  -1 43.8612 4.26768   7
   2   1  -1 47.1964 4.15478   1
  -2   1   1 48.4827 4.19084   1
   2   1  -1 45.2674 4.18693   8
  -2   1   1 51.2338 4.19077   8
   2   1  -1 40.3802 4.14454   6
  -2   1   1 46.3931 4.22373   8
   2   1  -1 47.9620 4.14927   8
   2   1  -1 42.4217 4.17061   5
  -2   1   1 36.6076 4.36056   7
   1  -1  -1 22.6071 1.85721   4
  -1  -1   1 17.5135 1.88225   4
   1  -1  -1 17.5246 1.91159   8
   1  -1  -1 21.5762 1.99234   7
  -1  -1   1 14.9586 1.80325   8
   1  -1  -1 18.2588 1.86824   2
   1  -1  -1 16.0713 1.86289   5
  -1  -1   1 17.5351 1.82392   6
   1  -1  -1 21.2207 1.88408   1
  -1   1   1 21.5442 1.88360   1
   1   1  -1 16.0698 1.76273   1
   1   1  -1 17.0900 1.92310   4
   1   1  -1 21.7461 1.78681   8
   1   1  -1 17.0850 1.79003   3
  -1   1   1 22.3856 2.02883   7
   1   1  -1 16.7597 1.83274   6
   1   1  -1 17.9991 1.78693   1
  -1   1   1 20.5889 1.91784   8
   0  -1  -1 1.82443 0.42583   1
   0  -1  -1 2.11817 0.49329   8
   0  -1  -1 3.16503 0.52918   7
   0  -1  -1 3.11572 0.47174   6
   0  -1   1 2.65634 0.51628   6
   0   1  -1 2.66080 0.53932   2
   0   1  -1 2.20387 0.33046   1
   0   1  -1 2.36086 0.34767   1
   0   1   1 2.37294 0.49810   1
   0   1   1 3.55573 0.56985   3
   0   1   1 2.16530 0.47700   8
   0   1  -1 2.49399 0.49573   5
  -1  -1  -1 80.1254 7.75526   4
  -1  -1  -1 94.7248 7.73195   1
   1  -1   1 75.7628 7.74188   2
  -1  -1  -1 100.562 7.82153   6
   1  -1   1 94.4295 7.70584   1
   1  -1   1 76.3024 7.74884   5
  -1  -1  -1 93.8716 7.73120   3
  -1  -1  -1 84.3059 7.73416   1
   1  -1   1 89.6857 7.70597   8
  -1  -1  -1 83.8307 7.74888   8
   1   1   1 90.7188 7.78588   6
  -1   1  -1 90.9557 7.72118   8
  -1   1  -1 92.8843 7.74046   2
  -1   1  -1 90.6744 7.70835   1
   1   1   1 75.7895 7.73335   8
  -1   1  -1 78.1430 7.78183   7
  -1   1  -1 90.7701 7.69985   8
   1   1   1 86.2706 7.75254   3
  -1   1  -1 72.8023 7.77429   5
   1   1   1 75.1577 7.76324   5
  -1   1  -1 89.8356 7.70643   1
   1   1   1 73.7852 7.72371   1
   2  -1   1 56.1941 4.87277   8
   2  -1   1 55.6732 4.86985   1
   2  -1   1 57.1138 4.87036   1
[truncated: 9,029,758 more chars]
