# Supplementary material for: A crystalline monosubstituted carbene
Source: Springer Nature journal article supplement (doi:10.1038/s41557-018-0153-1), 2018-10-05
Supplement: 41557_2018_153_MOESM63_ESM.cif [file 41557_2018_153_MOESM63_ESM.cif]

data_gb_rj_rnse2_0m_a_sq
_audit_creation_date              2017-12-04
_audit_creation_method
;
Olex2 1.2-beta
(compiled 2017.08.10 svn.r3458 for OlexSys, GUI svn.r5381)
;
_shelx_SHELXL_version_number      '2016/6'
_publ_contact_author_address      ?
_publ_contact_author_email        ?
_publ_contact_author_id_orcid     ?
_publ_contact_author_name         ''
_publ_contact_author_phone        ?
_publ_section_references
;
Dolomanov, O.V., Bourhis, L.J., Gildea, R.J, Howard, J.A.K. & Puschmann, H.
 (2009), J. Appl. Cryst. 42, 339-341.

Sheldrick, G.M. (2008). Acta Cryst. A64, 112-122.

Sheldrick, G.M. (2015). Acta Cryst. A71, 3-8.
;
_chemical_name_common             ?
_chemical_name_systematic         ?
_chemical_formula_moiety          'C97 H41 F48 N Se'
_chemical_formula_sum             'C97 H41 F48 N Se'
_chemical_formula_weight          2211.27
_chemical_melting_point           ?
loop_
  _atom_type_symbol
  _atom_type_description
  _atom_type_scat_dispersion_real
  _atom_type_scat_dispersion_imag
  _atom_type_scat_source
 'C' 'C' 0.0181 0.0091 'International Tables Vol C Tables 4.2.6.8 and 6.1.1.4'
 'H' 'H' 0.0000 0.0000 'International Tables Vol C Tables 4.2.6.8 and 6.1.1.4'
 'F' 'F' 0.0727 0.0534 'International Tables Vol C Tables 4.2.6.8 and 6.1.1.4'
 'N' 'N' 0.0311 0.0180 'International Tables Vol C Tables 4.2.6.8 and 6.1.1.4'
 'Se' 'Se' -0.7943 1.1372
 'International Tables Vol C Tables 4.2.6.8 and 6.1.1.4'

_shelx_space_group_comment
;
The symmetry employed for this shelxl refinement is uniquely defined
by the following loop, which should always be used as a source of
symmetry information in preference to the above space-group names.
They are only intended as comments.
;
_space_group_crystal_system       'triclinic'
_space_group_IT_number            2
_space_group_name_H-M_alt         'P -1'
_space_group_name_Hall            '-P 1'
loop_
  _space_group_symop_operation_xyz
 'x, y, z'
 '-x, -y, -z'

_cell_length_a                    15.7628(4)
_cell_length_b                    17.8043(4)
_cell_length_c                    18.6294(4)
_cell_angle_alpha                 91.0630(10)
_cell_angle_beta                  95.7110(10)
_cell_angle_gamma                 97.3210(10)
_cell_volume                      5157.3(2)
_cell_formula_units_Z             2
_cell_measurement_reflns_used     9933
_cell_measurement_temperature     100.0
_cell_measurement_theta_max       57.41
_cell_measurement_theta_min       2.50
_shelx_estimated_absorpt_T_max    0.850
_shelx_estimated_absorpt_T_min    0.730
_exptl_absorpt_coefficient_mu     1.680
_exptl_absorpt_correction_T_max   0.5152
_exptl_absorpt_correction_T_min   0.4243
_exptl_absorpt_correction_type    multi-scan
_exptl_absorpt_process_details
'SADABS-2016/2 (Bruker,2016/2) was used for absorption correction. wR2(int) was 0.0823 before and 0.0647 after correction. The Ratio of minimum to maximum transmission is 0.8236. The \l/2 correction factor is Not present.'
_exptl_absorpt_special_details    ?
_exptl_crystal_colour             yellow
_exptl_crystal_colour_primary     yellow
_exptl_crystal_density_diffrn     1.424
_exptl_crystal_density_meas       ?
_exptl_crystal_density_method     ?
_exptl_crystal_description        plate
_exptl_crystal_F_000              2192
_exptl_crystal_size_max           0.2
_exptl_crystal_size_mid           0.2
_exptl_crystal_size_min           0.1
_exptl_transmission_factor_max    ?
_exptl_transmission_factor_min    ?
_diffrn_reflns_av_R_equivalents   0.1033
_diffrn_reflns_av_unetI/netI      0.0632
_diffrn_reflns_Laue_measured_fraction_full 0.985
_diffrn_reflns_Laue_measured_fraction_max 0.985
_diffrn_reflns_limit_h_max        17
_diffrn_reflns_limit_h_min        -17
_diffrn_reflns_limit_k_max        19
_diffrn_reflns_limit_k_min        -19
_diffrn_reflns_limit_l_max        20
_diffrn_reflns_limit_l_min        -20
_diffrn_reflns_number             73458
_diffrn_reflns_point_group_measured_fraction_full 0.985
_diffrn_reflns_point_group_measured_fraction_max 0.985
_diffrn_reflns_theta_full         59.034
_diffrn_reflns_theta_max          59.034
_diffrn_reflns_theta_min          2.385
_diffrn_ambient_temperature       100.0
_diffrn_detector_area_resol_mean  ?
_diffrn_measured_fraction_theta_full 0.985
_diffrn_measured_fraction_theta_max 0.985
_diffrn_measurement_device_type   'Bruker APEX-II CCD'
_diffrn_measurement_method        '\f and \w scans'
_diffrn_radiation_type            CuK\a
_diffrn_radiation_wavelength      1.54178
_diffrn_source                    ?
_diffrn_standards_number          0
_reflns_Friedel_coverage          0.000
_reflns_Friedel_fraction_full     .
_reflns_Friedel_fraction_max      .
_reflns_number_gt                 9387
_reflns_number_total              14651
_reflns_special_details
;
 Reflections were merged by SHELXL according to the crystal
 class for the calculation of statistics and refinement.
 
 Structure factors included contributions from the .fab file.
 
 _reflns_Friedel_fraction is defined as the number of unique
 Friedel pairs measured divided by the number that would be
 possible theoretically, ignoring centric projections and
 systematic absences.
;
_reflns_threshold_expression      'I > 2\s(I)'
_computing_cell_refinement        'SAINT V8.38A (?, 2016)'
_computing_data_collection        ?
_computing_data_reduction         'SAINT V8.38A (?, 2016)'
_computing_molecular_graphics     'Olex2 (Dolomanov et al., 2009)'
_computing_publication_material   'Olex2 (Dolomanov et al., 2009)'
_computing_structure_refinement   'XL (Sheldrick, 2008)'
_computing_structure_solution     'ShelXT (Sheldrick, 2015)'
_refine_diff_density_max          1.328
_refine_diff_density_min          -0.874
_refine_diff_density_rms          0.076
_refine_ls_extinction_coef        .
_refine_ls_extinction_method      none
_refine_ls_goodness_of_fit_ref    1.024
_refine_ls_hydrogen_treatment     constr
_refine_ls_matrix_type            full
_refine_ls_number_parameters      1452
_refine_ls_number_reflns          14651
_refine_ls_number_restraints      210
_refine_ls_R_factor_all           0.1204
_refine_ls_R_factor_gt            0.0795
_refine_ls_restrained_S_all       1.023
_refine_ls_shift/su_max           0.000
_refine_ls_shift/su_mean          0.000
_refine_ls_structure_factor_coef  Fsqd
_refine_ls_weighting_details
'w=1/[\s^2^(Fo^2^)+(0.1449P)^2^+6.2917P] where P=(Fo^2^+2Fc^2^)/3'
_refine_ls_weighting_scheme       calc
_refine_ls_wR_factor_gt           0.2150
_refine_ls_wR_factor_ref          0.2500
_refine_special_details           ?
_olex2_refinement_description
;
1. Fixed Uiso
 At 1.2 times of:
  All C(H) groups, All C(H,H) groups
2. Restrained distances
 F46A-F48A
 2.15 with sigma of 0.01
 C96-C94 = C96A-C94
 1.51 with sigma of 0.01
 F47-C96 \\sim F47A-C96A \\sim F48A-C96A \\sim F48-C96 \\sim F46A-C96A \\sim
F46-C96
 with sigma of 0.01
 F26-C75 \\sim F26A-C75A \\sim F25-C75 \\sim F25A-C75A \\sim F27-C75 \\sim
F27A-C75A
 with sigma of 0.01
 F26A-F27A \\sim F27A-F25A \\sim F25A-F26A
 with sigma of 0.01
 F15A-C44 \\sim F15-C44 \\sim F14A-C44 \\sim F14-C44 \\sim F13A-C44 \\sim
F13-C44
 with sigma of 0.01
 F37-C88 \\sim F38A-C88 \\sim F38-C88 \\sim F39A-C88 \\sim F39-C88 \\sim
F37A-C88
 with sigma of 0.01
3. Uiso/Uaniso restraints and constraints
Uanis(C96) = Uanis(C96A)
Uanis(C75A) = Uanis(C75)
4. Rigid body (RIGU) restrains
 F47, C96, F48, F46
 with sigma for 1-2 distances of 0.002 and sigma for 1-3 distances of 0.004
 F47A, C96A, F48A, F46A
 with sigma for 1-2 distances of 0.002 and sigma for 1-3 distances of 0.004
 C75A, F26A, F27A, F25A
 with sigma for 1-2 distances of 0.002 and sigma for 1-3 distances of 0.004
 F26, C75, F25, F27
 with sigma for 1-2 distances of 0.002 and sigma for 1-3 distances of 0.004
 F15, C44, F14, F13
 with sigma for 1-2 distances of 0.002 and sigma for 1-3 distances of 0.004
 F15A, C44, F14A, F13A
 with sigma for 1-2 distances of 0.002 and sigma for 1-3 distances of 0.004
 F37A, C88, F38A, F39A
 with sigma for 1-2 distances of 0.002 and sigma for 1-3 distances of 0.004
 F37, C88, F38, F39
 with sigma for 1-2 distances of 0.002 and sigma for 1-3 distances of 0.004
5. Others
 Sof(Se1A)=Sof(H1B)=1-FVAR(1)
 Sof(Se1)=Sof(H1A)=FVAR(1)
 Sof(F46A)=Sof(C96A)=Sof(F48A)=Sof(F47A)=1-FVAR(2)
 Sof(F48)=Sof(F47)=Sof(F46)=Sof(C96)=FVAR(2)
 Sof(F26A)=Sof(C75A)=Sof(F25A)=Sof(F27A)=1-FVAR(3)
 Sof(F27)=Sof(F26)=Sof(F25)=Sof(C75)=FVAR(3)
 Sof(F13A)=Sof(F15A)=Sof(F14A)=1-FVAR(4)
 Sof(F14)=Sof(F15)=Sof(F13)=FVAR(4)
 Sof(F38A)=Sof(F37A)=Sof(F39A)=1-FVAR(5)
 Sof(F37)=Sof(F38)=Sof(F39)=FVAR(5)
6.a Aromatic/amide H refined with riding coordinates:
 C11(H11), C77(H77), C81(H81), C37(H37), C79(H79), C4(H4), C15(H15), C55(H55),
 C33(H33), C25(H25), C57(H57), C13(H13), C35(H35), C59(H59), C29(H29), C7(H7),
 C65(H65), C47(H47), C95(H95), C43(H43), C17(H17), C21(H21), C27(H27), C61(H61),
  C51(H51), C5(H5), C91(H91), C39(H39), C6(H6), C87(H87), C49(H49), C41(H41),
 C19(H19), C83(H83), C63(H63), C69(H69), C93(H93), C1(H1B), C1(H1A), C73(H73),
 C85(H85), C71(H71)
;
_atom_sites_solution_hydrogens    geom
_atom_sites_solution_primary      dual
_atom_sites_solution_secondary    ?
loop_
  _atom_site_label
  _atom_site_type_symbol
  _atom_site_fract_x
  _atom_site_fract_y
  _atom_site_fract_z
  _atom_site_U_iso_or_equiv
  _atom_site_adp_type
  _atom_site_occupancy
  _atom_site_site_symmetry_order
  _atom_site_calc_flag
  _atom_site_refinement_flags_posn
  _atom_site_refinement_flags_adp
  _atom_site_refinement_flags_occupancy
  _atom_site_disorder_assembly
  _atom_site_disorder_group
 Se1A Se 0.17929(9) 0.64203(8) 0.15863(8) 0.0685(6) Uani 0.519(2) 1 d . . P A
 2
 Se1 Se 0.27620(11) 0.72702(10) 0.11179(9) 0.0740(6) Uani 0.481(2) 1 d . . P A
 1
 F4 F 0.3382(2) 0.4038(2) 0.01934(16) 0.0625(9) Uani 1 1 d . . . . .
 F5 F 0.4320(2) 0.49592(17) 0.06244(16) 0.0599(9) Uani 1 1 d . . . . .
 F6 F 0.4714(2) 0.38816(19) 0.03910(17) 0.0625(9) Uani 1 1 d . . . . .
 F12 F 0.1600(3) 0.4558(2) 0.67651(19) 0.0726(10) Uani 1 1 d . . . . .
 F11 F 0.1189(2) 0.5601(2) 0.64030(18) 0.0681(10) Uani 1 1 d . . . . .
 F22 F 0.4349(2) 1.0860(2) 0.5507(2) 0.0779(11) Uani 1 1 d . . . . .
 F18 F -0.3020(2) 0.6854(2) 0.3419(3) 0.0818(12) Uani 1 1 d . . . . .
 F10 F 0.0264(2) 0.4706(2) 0.66978(19) 0.0773(11) Uani 1 1 d . . . . .
 F7 F -0.0641(3) 0.2797(2) 0.3826(2) 0.0835(13) Uani 1 1 d . . . . .
 F17 F -0.2261(2) 0.7781(2) 0.4024(3) 0.0888(14) Uani 1 1 d . . . . .
 F21 F 0.1499(3) 1.0622(2) 0.6490(2) 0.0855(12) Uani 1 1 d . . . . .
 N1 N 0.3187(2) 0.7061(2) 0.2599(2) 0.0327(9) Uani 1 1 d . . . . .
 F9 F -0.0188(3) 0.2281(2) 0.4797(2) 0.0938(14) Uani 1 1 d . . . . .
 F2 F 0.4295(3) 0.2331(2) 0.3343(2) 0.0952(14) Uani 1 1 d . . . . .
 F8 F -0.1202(3) 0.2984(3) 0.4812(2) 0.0934(14) Uani 1 1 d . . . . .
 F36 F 0.7825(3) 0.9332(3) 0.1910(3) 0.0956(14) Uani 1 1 d . . . . .
 F16 F -0.2941(3) 0.7971(2) 0.3017(3) 0.1010(15) Uani 1 1 d . . . . .
 F24 F 0.4440(3) 1.0336(3) 0.4472(3) 0.1048(17) Uani 1 1 d . . . . .
 F23 F 0.3813(3) 1.1312(3) 0.4531(3) 0.1087(17) Uani 1 1 d . . . . .
 F48 F 0.6758(7) 0.3921(6) 0.3896(6) 0.090(3) Uani 0.732(15) 1 d D U P B 1
 F1 F 0.3911(4) 0.1796(2) 0.2338(3) 0.122(2) Uani 1 1 d . . . . .
 C11 C 0.2970(3) 0.5472(2) 0.2877(3) 0.0322(11) Uani 1 1 d . . . . .
 H11 H 0.333253 0.568056 0.253351 0.039 Uiso 1 1 calc R . . . .
 C76 C 0.4653(3) 0.7218(2) 0.2159(2) 0.0304(10) Uani 1 1 d . . . . .
 F32 F 0.7187(3) 1.2496(2) 0.3258(3) 0.1069(16) Uani 1 1 d . . . . .
 C3 C 0.4363(3) 0.7321(2) 0.3468(3) 0.0321(11) Uani 1 1 d . . . . .
 C8 C 0.3695(3) 0.6969(2) 0.3808(3) 0.0328(11) Uani 1 1 d . . . . .
 C12 C 0.2832(3) 0.4687(2) 0.2940(2) 0.0313(11) Uani 1 1 d . . . . .
 F43 F 0.6817(4) 0.4243(3) 0.0488(3) 0.122(2) Uani 1 1 d . . . . .
 C78 C 0.5557(3) 0.6269(3) 0.1855(2) 0.0315(11) Uani 1 1 d . . . . .
 C24 C 0.3284(3) 0.4195(2) 0.2497(3) 0.0335(11) Uani 1 1 d . . . . .
 C77 C 0.4977(3) 0.6535(2) 0.2292(2) 0.0305(10) Uani 1 1 d . . . . .
 H77 H 0.480106 0.624400 0.268585 0.037 Uiso 1 1 calc R . . . .
 C54 C 0.4047(3) 0.8366(2) 0.2655(2) 0.0309(10) Uani 1 1 d . . . . .
 C56 C 0.4868(3) 0.9617(3) 0.2736(3) 0.0329(11) Uani 1 1 d . . . . .
 C2 C 0.4069(3) 0.7506(3) 0.2690(3) 0.0329(11) Uani 1 1 d . . . . .
 C10 C 0.2594(3) 0.5950(2) 0.3298(3) 0.0318(11) Uani 1 1 d . . . . .
 F31 F 0.6299(4) 1.2075(3) 0.3977(4) 0.138(2) Uani 1 1 d . . . . .
 C81 C 0.4885(3) 0.7627(3) 0.1568(2) 0.0312(11) Uani 1 1 d . . . . .
 H81 H 0.464531 0.808024 0.145953 0.037 Uiso 1 1 calc R . . . .
 C32 C 0.2171(3) 0.7285(2) 0.3487(3) 0.0338(11) Uani 1 1 d . . . . .
 C37 C 0.2385(3) 0.7939(2) 0.3925(3) 0.0351(11) Uani 1 1 d . . . . .
 H37 H 0.295686 0.806097 0.414584 0.042 Uiso 1 1 calc R . . . .
 F41 F 0.4205(4) 0.9369(3) -0.0428(3) 0.127(2) Uani 1 1 d . . . . .
 F20 F 0.0665(3) 1.0777(3) 0.5578(3) 0.1208(19) Uani 1 1 d . . . . .
 C79 C 0.5802(3) 0.6705(3) 0.1279(2) 0.0317(11) Uani 1 1 d . . . . .
 H79 H 0.620231 0.653698 0.098296 0.038 Uiso 1 1 calc R . . . .
 C4 C 0.5182(3) 0.7466(3) 0.3822(3) 0.0350(11) Uani 1 1 d . . . . .
 H4 H 0.564297 0.770262 0.358068 0.042 Uiso 1 1 calc R . . . .
 F47 F 0.6675(7) 0.5054(6) 0.4147(5) 0.088(2) Uani 0.732(15) 1 d D U P B 1
 C80 C 0.5476(3) 0.7376(3) 0.1127(2) 0.0331(11) Uani 1 1 d . . . . .
 F42 F 0.4324(4) 0.8728(3) -0.1375(3) 0.1207(18) Uani 1 1 d . . . . .
 C15 C 0.2048(3) 0.5642(3) 0.3796(3) 0.0359(11) Uani 1 1 d . . . . .
 H15 H 0.178186 0.596722 0.408728 0.043 Uiso 1 1 calc R . . . .
 C55 C 0.4832(3) 0.8842(3) 0.2725(3) 0.0332(11) Uani 1 1 d . . . . .
 H55 H 0.535367 0.862384 0.276554 0.040 Uiso 1 1 calc R . . . .
 F3 F 0.5154(4) 0.2361(3) 0.2524(4) 0.140(2) Uani 1 1 d . . . . .
 C33 C 0.1318(3) 0.7107(3) 0.3181(3) 0.0372(12) Uani 1 1 d . . . . .
 H33 H 0.115751 0.665131 0.289931 0.045 Uiso 1 1 calc R . . . .
 C25 C 0.3461(3) 0.4398(2) 0.1805(3) 0.0351(11) Uani 1 1 d . . . . .
 H25 H 0.325742 0.483633 0.160451 0.042 Uiso 1 1 calc R . . . .
 C9 C 0.2867(3) 0.6809(3) 0.3303(3) 0.0338(11) Uani 1 1 d . . . . .
 C26 C 0.3928(3) 0.3970(3) 0.1404(3) 0.0386(12) Uani 1 1 d . . . . .
 C14 C 0.1892(3) 0.4858(3) 0.3866(3) 0.0362(11) Uani 1 1 d . . . . .
 C46 C 0.2029(3) 0.9112(3) 0.4506(3) 0.0389(12) Uani 1 1 d . . . . .
 C36 C 0.1775(3) 0.8418(2) 0.4044(3) 0.0355(11) Uani 1 1 d . . . . .
 C16 C 0.1315(3) 0.4534(3) 0.4406(3) 0.0379(12) Uani 1 1 d . . . . .
 C82 C 0.5740(3) 0.7844(3) 0.0514(3) 0.0404(12) Uani 1 1 d . . . . .
 F45 F 0.7637(4) 0.3814(3) 0.1299(3) 0.129(2) Uani 1 1 d . . . . .
 F34 F 0.8572(3) 1.0399(3) 0.2095(4) 0.128(2) Uani 1 1 d . . . . .
 C60 C 0.5715(3) 1.0092(3) 0.2767(3) 0.0375(12) Uani 1 1 d . . . . .
 C34 C 0.0708(3) 0.7578(3) 0.3281(3) 0.0388(12) Uani 1 1 d . . . . .
 F44 F 0.6376(4) 0.3276(3) 0.1057(3) 0.1241(19) Uani 1 1 d . . . . .
 C90 C 0.5914(3) 0.5556(3) 0.2039(3) 0.0371(12) Uani 1 1 d . . . . .
 F33 F 0.7583(4) 1.1861(2) 0.4123(3) 0.133(2) Uani 1 1 d . . . . .
 C57 C 0.4099(3) 0.9936(3) 0.2686(3) 0.0390(12) Uani 1 1 d . . . . .
 H57 H 0.411537 1.047133 0.270662 0.047 Uiso 1 1 calc R . . . .
 C13 C 0.2274(3) 0.4384(3) 0.3431(3) 0.0371(12) Uani 1 1 d . . . . .
 H13 H 0.215552 0.384971 0.346646 0.045 Uiso 1 1 calc R . . . .
 F40 F 0.5128(4) 0.9771(3) -0.1109(3) 0.1234(19) Uani 1 1 d . . . . .
 C58 C 0.3305(3) 0.9473(3) 0.2606(3) 0.0419(12) Uani 1 1 d . . . . .
 C35 C 0.0936(3) 0.8245(3) 0.3705(3) 0.0372(12) Uani 1 1 d . . . . .
 H35 H 0.052230 0.858018 0.376181 0.045 Uiso 1 1 calc R . . . .
 C59 C 0.3296(3) 0.8690(3) 0.2586(3) 0.0392(12) Uani 1 1 d . . . . .
 H59 H 0.275982 0.837205 0.252342 0.047 Uiso 1 1 calc R . . . .
 F27 F -0.0239(7) 0.9633(7) 0.1255(7) 0.095(3) Uani 0.68(2) 1 d D U P C 1
 C38 C -0.0192(3) 0.7378(3) 0.2941(3) 0.0438(13) Uani 1 1 d . . . . .
 C29 C 0.3582(3) 0.3542(3) 0.2768(3) 0.0413(12) Uani 1 1 d . . . . .
 H29 H 0.346651 0.338860 0.323781 0.050 Uiso 1 1 calc R . . . .
 C7 C 0.3831(3) 0.6775(3) 0.4518(3) 0.0417(12) Uani 1 1 d . . . . .
 H7 H 0.336973 0.653561 0.475738 0.050 Uiso 1 1 calc R . . . .
 F19 F 0.0563(4) 0.9716(3) 0.6085(4) 0.158(3) Uani 1 1 d . . . . .
 C65 C 0.5898(3) 1.0757(3) 0.3181(3) 0.0418(12) Uani 1 1 d . . . . .
 H65 H 0.547806 1.091761 0.346047 0.050 Uiso 1 1 calc R . . . .
 C47 C 0.1466(4) 0.9352(3) 0.4972(3) 0.0434(13) Uani 1 1 d . . . . .
 H47 H 0.091053 0.907785 0.498659 0.052 Uiso 1 1 calc R . . . .
 C20 C 0.0858(3) 0.4535(3) 0.5603(3) 0.0442(13) Uani 1 1 d . . . . .
 C95 C 0.5975(3) 0.5321(3) 0.2741(3) 0.0445(13) Uani 1 1 d . . . . .
 H95 H 0.579609 0.561892 0.311250 0.053 Uiso 1 1 calc R . . . .
 C30 C 0.4090(4) 0.4211(3) 0.0662(3) 0.0501(14) Uani 1 1 d . . . . .
 C48 C 0.1727(4) 0.9999(3) 0.5417(3) 0.0509(14) Uani 1 1 d . . . . .
 C28 C 0.4040(4) 0.3118(3) 0.2364(3) 0.0466(13) Uani 1 1 d . . . . .
 C43 C -0.0887(3) 0.7529(3) 0.3301(3) 0.0478(14) Uani 1 1 d . . . . .
 H43 H -0.079123 0.776977 0.376651 0.057 Uiso 1 1 calc R . . . .
 C17 C 0.0717(3) 0.3898(3) 0.4225(3) 0.0456(13) Uani 1 1 d . . . . .
 H17 H 0.066792 0.366951 0.375488 0.055 Uiso 1 1 calc R . . . .
 C21 C 0.1381(3) 0.4853(3) 0.5098(3) 0.0439(13) Uani 1 1 d . . . . .
 H21 H 0.178380 0.529010 0.522756 0.053 Uiso 1 1 calc R . . . .
 C18 C 0.0190(3) 0.3599(3) 0.4732(3) 0.0470(13) Uani 1 1 d . . . . .
 C27 C 0.4226(4) 0.3322(3) 0.1679(3) 0.0445(13) Uani 1 1 d . . . . .
 H27 H 0.454734 0.302801 0.140404 0.053 Uiso 1 1 calc R . . . .
 C61 C 0.6342(3) 0.9871(3) 0.2360(3) 0.0448(13) Uani 1 1 d . . . . .
 H61 H 0.622278 0.941575 0.207341 0.054 Uiso 1 1 calc R . . . .
 C51 C 0.2840(3) 0.9529(3) 0.4492(3) 0.0446(13) Uani 1 1 d . . . . .
 H51 H 0.322963 0.937223 0.417931 0.054 Uiso 1 1 calc R . . . .
 C94 C 0.6301(4) 0.4643(3) 0.2906(3) 0.0568(16) Uani 1 1 d D . . . .
 C5 C 0.5321(4) 0.7264(3) 0.4529(3) 0.0470(13) Uani 1 1 d . . . . .
 H5 H 0.588279 0.735243 0.477811 0.056 Uiso 1 1 calc R . . . .
 C64 C 0.6712(4) 1.1198(3) 0.3188(3) 0.0542(15) Uani 1 1 d . . . . .
 C91 C 0.6204(3) 0.5098(3) 0.1510(3) 0.0460(13) Uani 1 1 d . . . . .
 H91 H 0.616435 0.524279 0.102104 0.055 Uiso 1 1 calc R . . . .
 C68 C 0.2474(4) 0.9790(3) 0.2533(4) 0.0530(15) Uani 1 1 d . . . . .
 C50 C 0.3076(4) 1.0175(3) 0.4936(3) 0.0508(14) Uani 1 1 d . . . . .
 C39 C -0.0354(3) 0.7025(3) 0.2261(3) 0.0507(14) Uani 1 1 d . . . . .
 H39 H 0.011398 0.692052 0.200745 0.061 Uiso 1 1 calc R . . . .
 F35 F 0.7581(4) 1.0213(5) 0.1220(3) 0.175(3) Uani 1 1 d . . . . .
 C22 C 0.0978(4) 0.4852(4) 0.6361(3) 0.0556(15) Uani 1 1 d . . . . .
 C42 C -0.1721(3) 0.7327(3) 0.2980(4) 0.0518(15) Uani 1 1 d . . . . .
 C6 C 0.4639(4) 0.6930(3) 0.4876(3) 0.0509(14) Uani 1 1 d . . . . .
 H6 H 0.473236 0.680705 0.536955 0.061 Uiso 1 1 calc R . . . .
 C62 C 0.7146(4) 1.0313(3) 0.2370(4) 0.0589(16) Uani 1 1 d . . . . .
 C87 C 0.5148(4) 0.8246(3) 0.0129(3) 0.0495(14) Uani 1 1 d . . . . .
 H87 H 0.457123 0.820347 0.024630 0.059 Uiso 1 1 calc R . . . .
 F28 F 0.0775(4) 1.1669(3) 0.3193(4) 0.154(3) Uani 1 1 d . . . . .
 C49 C 0.2533(4) 1.0409(3) 0.5397(3) 0.0539(15) Uani 1 1 d . . . . .
 H49 H 0.270557 1.084817 0.570047 0.065 Uiso 1 1 calc R . . . .
 F14 F -0.2100(9) 0.6484(15) 0.0890(14) 0.115(6) Uani 0.51(3) 1 d D U P D 1
 F15 F -0.0760(15) 0.6692(17) 0.0811(12) 0.125(7) Uani 0.51(3) 1 d D U P D 1
 F46 F 0.5528(4) 0.4314(6) 0.3921(4) 0.109(4) Uani 0.732(15) 1 d D U P B 1
 C41 C -0.1879(4) 0.6975(3) 0.2310(4) 0.0599(17) Uani 1 1 d . . . . .
 H41 H -0.245255 0.683795 0.209663 0.072 Uiso 1 1 calc R . . . .
 C19 C 0.0257(4) 0.3902(3) 0.5417(3) 0.0500(14) Uani 1 1 d . . . . .
 H19 H -0.009974 0.368347 0.576108 0.060 Uiso 1 1 calc R . . . .
 C53 C 0.3937(4) 1.0672(4) 0.4852(4) 0.0645(18) Uani 1 1 d . . . . .
 C92 C 0.6543(4) 0.4443(3) 0.1696(4) 0.0568(16) Uani 1 1 d . . . . .
 C83 C 0.6574(4) 0.7907(3) 0.0320(3) 0.0541(15) Uani 1 1 d . . . . .
 H83 H 0.697756 0.762567 0.056961 0.065 Uiso 1 1 calc R . . . .
 F29 F 0.2077(5) 1.2016(3) 0.3134(5) 0.184(4) Uani 1 1 d . . . . .
 C40 C -0.1186(4) 0.6823(4) 0.1948(4) 0.0595(16) Uani 1 1 d . . . . .
 F26 F -0.0421(8) 0.9034(7) 0.2246(9) 0.117(4) Uani 0.68(2) 1 d D U P C 1
 C45 C -0.2474(4) 0.7476(3) 0.3362(4) 0.0661(19) Uani 1 1 d . . . . .
 C63 C 0.7316(4) 1.0970(3) 0.2775(4) 0.0605(17) Uani 1 1 d . . . . .
 H63 H 0.785663 1.127290 0.277358 0.073 Uiso 1 1 calc R . . . .
 C69 C 0.2400(4) 1.0461(3) 0.2907(4) 0.0598(16) Uani 1 1 d . . . . .
 H69 H 0.288542 1.072648 0.318708 0.072 Uiso 1 1 calc R . . . .
 C93 C 0.6587(4) 0.4213(3) 0.2394(4) 0.0609(17) Uani 1 1 d . . . . .
 H93 H 0.681556 0.375814 0.251864 0.073 Uiso 1 1 calc R . . . .
 C67 C 0.6902(5) 1.1902(3) 0.3648(4) 0.0667(19) Uani 1 1 d . . . . .
 C86 C 0.5404(5) 0.8710(3) -0.0425(3) 0.0624(17) Uani 1 1 d . . . . .
 C97 C 0.6853(5) 0.3956(4) 0.1127(5) 0.077(2) Uani 1 1 d . . . . .
 C70 C 0.1592(5) 1.0746(4) 0.2866(4) 0.0708(19) Uani 1 1 d . . . . .
 C84 C 0.6828(5) 0.8368(4) -0.0228(4) 0.0711(19) Uani 1 1 d . . . . .
 F37 F 0.8290(9) 0.8485(11) 0.0137(8) 0.157(6) Uani 0.77(3) 1 d D U P E 1
 F25 F 0.0307(6) 0.8588(5) 0.1436(9) 0.110(4) Uani 0.68(2) 1 d D U P C 1
 C1 C 0.2738(4) 0.6940(4) 0.1958(3) 0.0595(16) Uani 1 1 d . . . . .
 H1B H 0.301773 0.722022 0.159963 0.071 Uiso 0.519(2) 1 calc R . P A 2
 H1A H 0.226573 0.655499 0.197771 0.071 Uiso 0.481(2) 1 calc R . P A 1
 C23 C -0.0457(5) 0.2911(4) 0.4535(4) 0.069(2) Uani 1 1 d . . . . .
 C31 C 0.4357(5) 0.2419(4) 0.2657(4) 0.072(2) Uani 1 1 d . . . . .
 C73 C 0.1753(4) 0.9417(4) 0.2131(4) 0.0687(19) Uani 1 1 d . . . . .
 H73 H 0.179931 0.895931 0.187569 0.082 Uiso 1 1 calc R . . . .
 C52 C 0.1116(5) 1.0253(4) 0.5897(4) 0.072(2) Uani 1 1 d . . . . .
 C66 C 0.7773(4) 1.0057(5) 0.1889(5) 0.082(2) Uani 1 1 d . . . . .
 F30 F 0.1697(7) 1.1391(4) 0.3984(4) 0.190(4) Uani 1 1 d . . . . .
 C89 C 0.4760(6) 0.9134(5) -0.0833(4) 0.081(2) Uani 1 1 d . . . . .
 C85 C 0.6241(5) 0.8777(4) -0.0603(4) 0.074(2) Uani 1 1 d . . . . .
 H85 H 0.641362 0.909823 -0.097826 0.088 Uiso 1 1 calc R . . . .
 C72 C 0.0967(4) 0.9691(4) 0.2091(5) 0.083(2) Uani 1 1 d . . . . .
 C44 C -0.1345(4) 0.6426(4) 0.1232(4) 0.0820(17) Uani 1 1 d D U . . .
 C71 C 0.0899(5) 1.0348(4) 0.2463(5) 0.089(3) Uani 1 1 d . . . . .
 H71 H 0.035790 1.053177 0.244204 0.107 Uiso 1 1 calc R . . . .
 C96 C 0.6309(5) 0.4479(5) 0.3695(4) 0.071(2) Uani 0.732(15) 1 d D U P B 1
 F13 F -0.1288(17) 0.5695(6) 0.1280(13) 0.128(6) Uani 0.51(3) 1 d D U P D 1
 C74 C 0.1546(6) 1.1456(5) 0.3281(7) 0.100(3) Uani 1 1 d . . . . .
 F38 F 0.7918(9) 0.8959(10) -0.0872(12) 0.193(8) Uani 0.77(3) 1 d D U P E 1
 F39 F 0.7831(6) 0.7791(8) -0.0789(9) 0.164(7) Uani 0.77(3) 1 d D U P E 1
 C88 C 0.7708(6) 0.8415(5) -0.0428(4) 0.112(2) Uani 1 1 d D U . . .
 C75 C 0.0166(8) 0.9238(6) 0.1774(8) 0.088(3) Uani 0.68(2) 1 d D U P C 1
 F46A F 0.5710(10) 0.3685(13) 0.3602(10) 0.093(7) Uani 0.268(15) 1 d D U P B 2
 C96A C 0.6343(12) 0.4265(10) 0.3622(8) 0.071(2) Uani 0.268(15) 1 d D U P B 2
 F48A F 0.7080(10) 0.3977(11) 0.3780(14) 0.058(5) Uani 0.268(15) 1 d D U P B 2
 F47A F 0.626(2) 0.4795(14) 0.4123(14) 0.094(9) Uani 0.268(15) 1 d D U P B 2
 F26A F -0.0314(15) 0.8975(13) 0.184(2) 0.115(7) Uani 0.32(2) 1 d D U P C 2
 C75A C 0.0300(17) 0.9375(12) 0.1486(15) 0.088(3) Uani 0.32(2) 1 d D U P C 2
 F25A F 0.0493(12) 0.8882(18) 0.0978(17) 0.125(8) Uani 0.32(2) 1 d D U P C 2
 F27A F -0.010(2) 0.9899(18) 0.1114(19) 0.162(13) Uani 0.32(2) 1 d D U P C 2
 F13A F -0.177(2) 0.5738(9) 0.1245(16) 0.158(10) Uani 0.49(3) 1 d D U P D 2
 F15A F -0.0681(12) 0.6332(16) 0.0888(14) 0.110(6) Uani 0.49(3) 1 d D U P D 2
 F14A F -0.184(2) 0.677(2) 0.0773(14) 0.157(10) Uani 0.49(3) 1 d D U P D 2
 F38A F 0.810(2) 0.9116(12) -0.028(3) 0.146(15) Uani 0.23(3) 1 d D U P E 2
 F37A F 0.826(2) 0.808(3) 0.000(3) 0.136(17) Uani 0.23(3) 1 d D U P E 2
 F39A F 0.778(2) 0.830(3) -0.1120(8) 0.161(14) Uani 0.23(3) 1 d D U P E 2

loop_
  _atom_site_aniso_label
  _atom_site_aniso_U_11
  _atom_site_aniso_U_22
  _atom_site_aniso_U_33
  _atom_site_aniso_U_23
  _atom_site_aniso_U_13
  _atom_site_aniso_U_12
 Se1A 0.0532(9) 0.0790(10) 0.0704(10) -0.0137(7) 0.0050(6) 0.0010(7)
 Se1 0.0710(11) 0.0846(12) 0.0647(10) 0.0021(8) -0.0005(8) 0.0090(8)
 F4 0.066(2) 0.079(2) 0.0403(18) -0.0073(16) 0.0020(17) 0.0075(18)
 F5 0.089(2) 0.0451(19) 0.0461(18) 0.0067(14) 0.0213(17) -0.0018(16)
 F6 0.072(2) 0.072(2) 0.0490(19) -0.0047(16) 0.0233(17) 0.0175(18)
 F12 0.080(3) 0.084(3) 0.056(2) 0.0012(18) 0.0055(19) 0.017(2)
 F11 0.086(3) 0.060(2) 0.059(2) -0.0127(17) 0.0230(18) 0.0013(19)
 F22 0.072(2) 0.068(2) 0.085(3) -0.026(2) -0.005(2) -0.0116(19)
 F18 0.050(2) 0.052(2) 0.143(4) -0.015(2) 0.034(2) -0.0071(17)
 F10 0.066(2) 0.107(3) 0.061(2) -0.011(2) 0.0379(19) -0.004(2)
 F7 0.087(3) 0.084(3) 0.068(2) -0.014(2) 0.025(2) -0.047(2)
 F17 0.054(2) 0.082(3) 0.131(4) -0.042(3) 0.043(2) -0.0073(19)
 F21 0.107(3) 0.078(3) 0.073(3) -0.028(2) 0.025(2) 0.009(2)
 N1 0.031(2) 0.027(2) 0.041(2) -0.0044(17) 0.0079(18) 0.0017(16)
 F9 0.131(4) 0.046(2) 0.097(3) 0.006(2) 0.028(3) -0.029(2)
 F2 0.143(4) 0.084(3) 0.077(3) 0.036(2) 0.032(3) 0.067(3)
 F8 0.069(3) 0.106(3) 0.094(3) -0.020(2) 0.038(2) -0.049(2)
 F36 0.062(2) 0.093(3) 0.138(4) -0.013(3) 0.040(3) 0.017(2)
 F16 0.064(2) 0.082(3) 0.173(5) 0.032(3) 0.051(3) 0.039(2)
 F24 0.077(3) 0.114(3) 0.112(3) -0.045(3) 0.037(3) -0.047(3)
 F23 0.125(4) 0.072(3) 0.110(3) 0.012(3) -0.004(3) -0.050(3)
 F48 0.097(6) 0.095(5) 0.092(5) 0.049(4) 0.014(5) 0.050(5)
 F1 0.228(6) 0.036(2) 0.110(4) 0.017(2) 0.025(4) 0.042(3)
 C11 0.031(2) 0.027(2) 0.038(3) -0.003(2) 0.007(2) 0.000(2)
 C76 0.025(2) 0.029(2) 0.038(3) -0.006(2) 0.007(2) 0.0023(19)
 F32 0.140(4) 0.036(2) 0.143(4) 0.017(2) 0.018(3) -0.003(2)
 C3 0.036(3) 0.024(2) 0.037(3) -0.004(2) 0.008(2) 0.006(2)
 C8 0.033(3) 0.025(2) 0.042(3) -0.005(2) 0.011(2) 0.004(2)
 C12 0.032(3) 0.026(2) 0.036(3) -0.007(2) 0.009(2) 0.003(2)
 F43 0.198(6) 0.104(3) 0.092(3) -0.002(3) 0.046(3) 0.097(4)
 C78 0.030(3) 0.030(2) 0.034(3) -0.005(2) 0.000(2) 0.006(2)
 C24 0.041(3) 0.022(2) 0.037(3) -0.004(2) 0.007(2) 0.003(2)
 C77 0.032(3) 0.026(2) 0.033(3) 0.0004(19) 0.004(2) 0.003(2)
 C54 0.031(3) 0.025(2) 0.037(3) 0.0021(19) 0.008(2) 0.003(2)
 C56 0.029(3) 0.033(3) 0.037(3) 0.004(2) 0.004(2) 0.005(2)
 C2 0.027(2) 0.028(2) 0.045(3) -0.004(2) 0.011(2) 0.002(2)
 C10 0.029(2) 0.027(2) 0.040(3) -0.005(2) 0.012(2) -0.002(2)
 F31 0.113(4) 0.104(4) 0.187(6) -0.097(4) 0.055(4) -0.040(3)
 C81 0.031(3) 0.029(2) 0.036(3) -0.003(2) 0.006(2) 0.008(2)
 C32 0.032(3) 0.025(2) 0.048(3) -0.002(2) 0.016(2) 0.006(2)
 C37 0.030(3) 0.027(2) 0.048(3) -0.001(2) 0.013(2) -0.001(2)
 F41 0.164(5) 0.155(5) 0.088(3) 0.046(3) 0.028(3) 0.107(4)
 F20 0.110(4) 0.144(4) 0.123(4) -0.044(3) 0.008(3) 0.079(4)
 C79 0.029(2) 0.036(3) 0.030(2) -0.003(2) 0.004(2) 0.006(2)
 C4 0.029(3) 0.033(3) 0.042(3) -0.005(2) 0.006(2) -0.003(2)
 F47 0.108(6) 0.094(5) 0.063(4) 0.031(4) 0.005(4) 0.023(4)
 C80 0.037(3) 0.033(3) 0.029(2) 0.001(2) 0.002(2) 0.004(2)
 F42 0.161(5) 0.104(4) 0.097(4) 0.007(3) -0.036(3) 0.053(3)
 C15 0.029(3) 0.032(3) 0.047(3) -0.005(2) 0.014(2) 0.000(2)
 C55 0.028(2) 0.031(3) 0.042(3) -0.002(2) 0.006(2) 0.006(2)
 F3 0.136(5) 0.134(4) 0.189(6) 0.095(4) 0.086(4) 0.099(4)
 C33 0.030(3) 0.028(2) 0.054(3) -0.011(2) 0.011(2) 0.003(2)
 C25 0.045(3) 0.021(2) 0.040(3) -0.004(2) 0.008(2) 0.005(2)
 C9 0.031(3) 0.027(2) 0.044(3) -0.005(2) 0.013(2) 0.002(2)
 C26 0.048(3) 0.030(3) 0.037(3) -0.004(2) 0.007(2) 0.002(2)
 C14 0.033(3) 0.034(3) 0.041(3) -0.003(2) 0.013(2) -0.003(2)
 C46 0.045(3) 0.024(2) 0.049(3) -0.003(2) 0.007(2) 0.008(2)
 C36 0.038(3) 0.023(2) 0.047(3) -0.003(2) 0.015(2) 0.004(2)
 C16 0.034(3) 0.035(3) 0.047(3) 0.000(2) 0.020(2) 0.000(2)
 C82 0.050(3) 0.039(3) 0.036(3) 0.004(2) 0.011(2) 0.013(2)
 F45 0.105(4) 0.145(5) 0.153(5) -0.033(4) 0.012(3) 0.082(4)
 F34 0.047(2) 0.105(3) 0.238(7) 0.003(4) 0.064(3) -0.004(2)
 C60 0.036(3) 0.031(3) 0.047(3) 0.011(2) 0.006(2) 0.006(2)
 C34 0.035(3) 0.031(3) 0.052(3) -0.004(2) 0.014(2) 0.004(2)
 F44 0.155(5) 0.061(3) 0.160(5) -0.034(3) 0.027(4) 0.022(3)
 C90 0.031(3) 0.032(3) 0.049(3) 0.002(2) 0.002(2) 0.007(2)
 F33 0.147(5) 0.062(3) 0.165(5) -0.003(3) -0.080(4) -0.011(3)
 C57 0.040(3) 0.026(2) 0.054(3) 0.009(2) 0.018(2) 0.009(2)
 C13 0.040(3) 0.028(2) 0.043(3) -0.003(2) 0.009(2) -0.001(2)
 F40 0.166(5) 0.108(4) 0.105(4) 0.057(3) 0.009(3) 0.043(4)
 C58 0.034(3) 0.035(3) 0.062(3) 0.012(2) 0.014(2) 0.016(2)
 C35 0.033(3) 0.029(2) 0.051(3) -0.003(2) 0.009(2) 0.005(2)
 C59 0.025(3) 0.037(3) 0.057(3) 0.006(2) 0.009(2) 0.005(2)
 F27 0.060(4) 0.088(6) 0.134(7) 0.015(5) -0.005(4) 0.014(5)
 C38 0.031(3) 0.034(3) 0.067(4) -0.008(3) 0.010(3) 0.005(2)
 C29 0.050(3) 0.032(3) 0.044(3) 0.004(2) 0.012(2) 0.008(2)
 C7 0.048(3) 0.038(3) 0.039(3) 0.001(2) 0.011(2) 0.000(2)
 F19 0.151(5) 0.104(4) 0.223(7) -0.097(4) 0.144(5) -0.051(4)
 C65 0.040(3) 0.032(3) 0.052(3) 0.007(2) 0.001(2) 0.003(2)
 C47 0.046(3) 0.031(3) 0.055(3) -0.006(2) 0.011(3) 0.010(2)
 C20 0.042(3) 0.047(3) 0.045(3) -0.003(2) 0.014(2) 0.005(2)
 C95 0.040(3) 0.040(3) 0.054(3) 0.008(3) 0.005(3) 0.002(2)
 C30 0.064(4) 0.045(3) 0.044(3) -0.008(3) 0.012(3) 0.015(3)
 C48 0.071(4) 0.030(3) 0.055(3) -0.014(2) 0.012(3) 0.017(3)
 C28 0.056(3) 0.030(3) 0.057(3) 0.003(2) 0.013(3) 0.012(2)
 C43 0.038(3) 0.034(3) 0.072(4) -0.012(3) 0.011(3) 0.003(2)
 C17 0.042(3) 0.041(3) 0.054(3) -0.002(2) 0.018(3) -0.004(2)
 C21 0.036(3) 0.042(3) 0.054(3) -0.005(2) 0.018(3) 0.002(2)
 C18 0.043(3) 0.048(3) 0.048(3) 0.000(3) 0.015(3) -0.009(3)
 C27 0.056(3) 0.032(3) 0.049(3) -0.006(2) 0.017(3) 0.012(2)
 C61 0.039(3) 0.042(3) 0.057(3) 0.011(3) 0.014(3) 0.011(2)
 C51 0.045(3) 0.030(3) 0.058(3) -0.009(2) 0.006(3) 0.002(2)
 C94 0.045(3) 0.054(4) 0.069(4) 0.025(3) -0.004(3) 0.003(3)
 C5 0.046(3) 0.044(3) 0.049(3) 0.000(3) -0.002(3) 0.001(2)
 C64 0.046(3) 0.036(3) 0.076(4) 0.013(3) -0.005(3) -0.004(3)
 C91 0.043(3) 0.040(3) 0.057(3) 0.000(3) 0.005(3) 0.016(2)
 C68 0.045(3) 0.036(3) 0.085(4) 0.020(3) 0.020(3) 0.018(3)
 C50 0.053(3) 0.032(3) 0.064(4) -0.010(3) 0.004(3) -0.002(2)
 C39 0.030(3) 0.054(3) 0.068(4) -0.010(3) 0.004(3) 0.008(2)
 F35 0.152(5) 0.308(10) 0.111(4) 0.081(5) 0.087(4) 0.135(6)
 C22 0.052(4) 0.065(4) 0.051(4) -0.003(3) 0.018(3) 0.004(3)
 C42 0.034(3) 0.039(3) 0.084(4) -0.005(3) 0.014(3) 0.007(2)
 C6 0.062(4) 0.051(3) 0.040(3) 0.004(3) 0.005(3) 0.005(3)
 C62 0.038(3) 0.054(4) 0.088(5) 0.017(3) 0.016(3) 0.006(3)
 C87 0.063(4) 0.053(3) 0.038(3) 0.005(3) 0.015(3) 0.020(3)
 F28 0.107(4) 0.119(4) 0.251(8) -0.040(4) 0.025(4) 0.074(4)
 C49 0.062(4) 0.037(3) 0.063(4) -0.013(3) 0.004(3) 0.008(3)
 F14 0.047(5) 0.169(14) 0.125(12) -0.075(9) -0.032(6) 0.037(7)
 F15 0.086(9) 0.195(17) 0.082(8) -0.063(11) 0.008(7) -0.012(10)
 F46 0.078(4) 0.145(9) 0.114(6) 0.076(6) 0.034(4) 0.026(4)
 C41 0.034(3) 0.054(4) 0.092(5) -0.011(3) 0.002(3) 0.013(3)
 C19 0.043(3) 0.050(3) 0.058(4) 0.007(3) 0.018(3) -0.004(3)
 C53 0.061(4) 0.052(4) 0.074(4) -0.027(4) 0.007(4) -0.013(3)
 C92 0.055(4) 0.041(3) 0.079(5) 0.003(3) 0.008(3) 0.018(3)
 C83 0.060(4) 0.051(3) 0.058(4) 0.013(3) 0.025(3) 0.015(3)
 F29 0.166(6) 0.064(3) 0.335(11) -0.053(5) 0.126(7) -0.001(4)
 C40 0.044(4) 0.061(4) 0.072(4) -0.012(3) -0.004(3) 0.011(3)
 F26 0.059(5) 0.126(7) 0.174(11) 0.051(7) 0.032(6) 0.023(4)
 C45 0.037(3) 0.046(3) 0.116(6) -0.014(4) 0.023(4) 0.000(3)
 C63 0.036(3) 0.051(4) 0.095(5) 0.023(3) 0.009(3) 0.001(3)
 C69 0.047(3) 0.048(3) 0.090(5) 0.015(3) 0.021(3) 0.013(3)
 C93 0.053(4) 0.039(3) 0.094(5) 0.011(3) 0.008(3) 0.016(3)
 C67 0.055(4) 0.040(3) 0.097(5) 0.007(3) -0.013(4) -0.007(3)
 C86 0.093(5) 0.056(4) 0.046(3) 0.012(3) 0.017(3) 0.028(3)
 C97 0.093(6) 0.062(5) 0.084(6) -0.005(4) 0.002(4) 0.048(4)
 C70 0.064(4) 0.048(4) 0.109(6) 0.017(4) 0.023(4) 0.025(3)
 C84 0.078(5) 0.072(4) 0.073(4) 0.024(4) 0.040(4) 0.018(4)
 F37 0.074(5) 0.225(16) 0.175(7) 0.047(9) 0.050(4) -0.009(8)
 F25 0.054(5) 0.093(5) 0.178(11) -0.007(5) -0.013(6) 0.016(4)
 C1 0.064(4) 0.058(4) 0.056(4) -0.008(3) 0.007(3) 0.005(3)
 C23 0.073(5) 0.069(5) 0.060(4) -0.007(3) 0.026(4) -0.029(4)
 C31 0.100(6) 0.047(4) 0.085(5) 0.022(4) 0.040(4) 0.043(4)
 C73 0.033(3) 0.058(4) 0.117(6) 0.009(4) 0.003(3) 0.016(3)
 C52 0.085(5) 0.054(4) 0.080(5) -0.028(4) 0.016(4) 0.019(4)
 C66 0.043(4) 0.097(6) 0.113(7) 0.027(5) 0.040(4) 0.012(4)
 F30 0.319(11) 0.154(6) 0.126(5) -0.020(5) 0.018(6) 0.147(7)
 C89 0.117(7) 0.085(5) 0.052(4) 0.025(4) 0.015(5) 0.045(5)
 C85 0.098(6) 0.068(4) 0.064(4) 0.024(3) 0.042(4) 0.016(4)
 C72 0.047(4) 0.064(4) 0.139(7) 0.002(4) 0.004(4) 0.018(3)
 C44 0.044(3) 0.106(4) 0.093(5) -0.038(4) -0.013(2) 0.019(3)
 C71 0.049(4) 0.071(5) 0.155(8) 0.010(5) 0.030(5) 0.022(4)
 C96 0.069(4) 0.073(5) 0.079(5) 0.035(3) 0.015(3) 0.025(3)
 F13 0.152(15) 0.111(5) 0.118(11) -0.059(7) -0.029(12) 0.053(7)
 C74 0.098(7) 0.063(5) 0.150(10) 0.006(5) 0.026(6) 0.046(5)
 F38 0.139(9) 0.217(12) 0.255(17) 0.158(14) 0.127(11) 0.036(9)
 F39 0.114(7) 0.187(9) 0.217(14) 0.008(9) 0.110(8) 0.041(6)
 C88 0.086(5) 0.130(6) 0.138(6) 0.062(5) 0.071(4) 0.023(5)
 C75 0.037(5) 0.085(6) 0.143(9) 0.022(5) 0.009(5) 0.011(5)
 F46A 0.087(9) 0.107(11) 0.084(11) 0.058(9) 0.013(8) -0.001(9)
 C96A 0.069(4) 0.073(5) 0.079(5) 0.035(3) 0.015(3) 0.025(3)
 F48A 0.071(7) 0.045(8) 0.057(11) -0.001(7) -0.007(8) 0.015(7)
 F47A 0.16(3) 0.073(11) 0.069(10) 0.052(7) 0.052(15) 0.048(11)
 F26A 0.055(10) 0.096(12) 0.19(2) 0.018(12) 0.023(11) -0.016(8)
 C75A 0.037(5) 0.085(6) 0.143(9) 0.022(5) 0.009(5) 0.011(5)
 F25A 0.055(10) 0.150(17) 0.162(15) -0.035(14) -0.012(10) 0.006(11)
 F27A 0.090(17) 0.125(18) 0.27(3) 0.076(16) -0.019(15) 0.020(14)
 F13A 0.17(2) 0.138(7) 0.149(16) -0.092(10) 0.050(16) -0.058(10)
 F15A 0.056(6) 0.158(16) 0.113(10) -0.074(10) -0.004(5) 0.026(8)
 F14A 0.152(18) 0.24(2) 0.090(9) -0.055(12) -0.055(13) 0.110(16)
 F38A 0.102(19) 0.149(11) 0.20(4) 0.053(17) 0.08(2) -0.001(11)
 F37A 0.064(15) 0.19(4) 0.17(2) 0.10(3) 0.079(15) 0.03(2)
 F39A 0.18(3) 0.18(4) 0.144(8) 0.076(14) 0.112(13) 0.04(3)

_geom_special_details
;
 All esds (except the esd in the dihedral angle between two l.s. planes)
 are estimated using the full covariance matrix.  The cell esds are taken
 into account individually in the estimation of esds in distances, angles
 and torsion angles; correlations between esds in cell parameters are only
 used when they are defined by crystal symmetry.  An approximate (isotropic)
 treatment of cell esds is used for estimating esds involving l.s. planes.
;
loop_
  _geom_bond_atom_site_label_1
  _geom_bond_atom_site_label_2
  _geom_bond_distance
  _geom_bond_site_symmetry_2
  _geom_bond_publ_flag
 Se1A C1 1.725(6) . ?
 Se1 C1 1.683(7) . ?
 F4 C30 1.345(7) . ?
 F5 C30 1.340(6) . ?
 F6 C30 1.343(6) . ?
 F12 C22 1.342(7) . ?
 F11 C22 1.332(7) . ?
 F22 C53 1.340(7) . ?
 F18 C45 1.325(7) . ?
 F10 C22 1.342(7) . ?
 F7 C23 1.331(7) . ?
 F17 C45 1.333(8) . ?
 F21 C52 1.325(8) . ?
 N1 C2 1.503(6) . ?
 N1 C9 1.507(6) . ?
 N1 C1 1.326(7) . ?
 F9 C23 1.334(9) . ?
 F2 C31 1.302(8) . ?
 F8 C23 1.348(8) . ?
 F36 C66 1.304(9) . ?
 F16 C45 1.349(8) . ?
 F24 C53 1.306(8) . ?
 F23 C53 1.324(8) . ?
 F48 C96 1.331(7) . ?
 F1 C31 1.330(9) . ?
 C11 H11 0.9500 . ?
 C11 C12 1.396(6) . ?
 C11 C10 1.373(7) . ?
 C76 C77 1.394(6) . ?
 C76 C2 1.540(6) . ?
 C76 C81 1.386(7) . ?
 F32 C67 1.350(8) . ?
 C3 C8 1.371(7) . ?
 C3 C2 1.533(7) . ?
 C3 C4 1.381(7) . ?
 C8 C9 1.523(7) . ?
 C8 C7 1.377(7) . ?
 C12 C24 1.485(6) . ?
 C12 C13 1.398(7) . ?
 F43 C97 1.303(9) . ?
 C78 C77 1.403(7) . ?
 C78 C79 1.392(7) . ?
 C78 C90 1.486(7) . ?
 C24 C25 1.390(7) . ?
 C24 C29 1.393(7) . ?
 C77 H77 0.9500 . ?
 C54 C2 1.537(6) . ?
 C54 C55 1.403(6) . ?
 C54 C59 1.378(7) . ?
 C56 C55 1.374(7) . ?
 C56 C60 1.482(7) . ?
 C56 C57 1.397(7) . ?
 C10 C15 1.401(7) . ?
 C10 C9 1.534(6) . ?
 F31 C67 1.247(9) . ?
 C81 H81 0.9500 . ?
 C81 C80 1.409(7) . ?
 C32 C37 1.395(7) . ?
 C32 C33 1.402(7) . ?
 C32 C9 1.531(7) . ?
 C37 H37 0.9500 . ?
 C37 C36 1.394(7) . ?
 F41 C89 1.312(9) . ?
 F20 C52 1.355(9) . ?
 C79 H79 0.9500 . ?
 C79 C80 1.383(7) . ?
 C4 H4 0.9500 . ?
 C4 C5 1.376(7) . ?
 F47 C96 1.345(7) . ?
 C80 C82 1.488(7) . ?
 F42 C89 1.313(9) . ?
 C15 H15 0.9500 . ?
 C15 C14 1.396(7) . ?
 C55 H55 0.9500 . ?
 F3 C31 1.321(9) . ?
 C33 H33 0.9500 . ?
 C33 C34 1.379(7) . ?
 C25 H25 0.9500 . ?
 C25 C26 1.383(7) . ?
 C26 C30 1.492(8) . ?
 C26 C27 1.387(7) . ?
 C14 C16 1.497(7) . ?
 C14 C13 1.392(7) . ?
 C46 C36 1.480(7) . ?
 C46 C47 1.401(7) . ?
 C46 C51 1.397(7) . ?
 C36 C35 1.403(7) . ?
 C16 C17 1.391(7) . ?
 C16 C21 1.388(7) . ?
 C82 C87 1.398(8) . ?
 C82 C83 1.388(8) . ?
 F45 C97 1.304(9) . ?
 F34 C66 1.343(9) . ?
 C60 C65 1.385(7) . ?
 C60 C61 1.392(7) . ?
 C34 C35 1.401(7) . ?
 C34 C38 1.491(7) . ?
 F44 C97 1.339(9) . ?
 C90 C95 1.379(7) . ?
 C90 C91 1.414(7) . ?
 F33 C67 1.332(8) . ?
 C57 H57 0.9500 . ?
 C57 C58 1.402(7) . ?
 C13 H13 0.9500 . ?
 F40 C89 1.342(9) . ?
 C58 C59 1.393(7) . ?
 C58 C68 1.487(7) . ?
 C35 H35 0.9500 . ?
 C59 H59 0.9500 . ?
 F27 C75 1.361(8) . ?
 C38 C43 1.392(8) . ?
 C38 C39 1.389(8) . ?
 C29 H29 0.9500 . ?
 C29 C28 1.372(7) . ?
 C7 H7 0.9500 . ?
 C7 C6 1.370(8) . ?
 F19 C52 1.288(9) . ?
 C65 H65 0.9500 . ?
 C65 C64 1.415(8) . ?
 C47 H47 0.9500 . ?
 C47 C48 1.399(7) . ?
 C20 C21 1.394(7) . ?
 C20 C22 1.496(8) . ?
 C20 C19 1.391(8) . ?
 C95 H95 0.9500 . ?
 C95 C94 1.398(8) . ?
 C48 C49 1.387(8) . ?
 C48 C52 1.482(9) . ?
 C28 C27 1.384(8) . ?
 C28 C31 1.492(8) . ?
 C43 H43 0.9500 . ?
 C43 C42 1.389(8) . ?
 C17 H17 0.9500 . ?
 C17 C18 1.388(7) . ?
 C21 H21 0.9500 . ?
 C18 C19 1.365(8) . ?
 C18 C23 1.506(8) . ?
 C27 H27 0.9500 . ?
 C61 H61 0.9500 . ?
 C61 C62 1.403(8) . ?
 C51 H51 0.9500 . ?
 C51 C50 1.394(7) . ?
 C94 C93 1.360(9) . ?
 C94 C96 1.503(8) . ?
 C94 C96A 1.504(10) . ?
 C5 H5 0.9500 . ?
 C5 C6 1.385(8) . ?
 C64 C63 1.375(9) . ?
 C64 C67 1.487(9) . ?
 C91 H91 0.9500 . ?
 C91 C92 1.379(8) . ?
 C68 C69 1.394(9) . ?
 C68 C73 1.383(9) . ?
 C50 C49 1.367(8) . ?
 C50 C53 1.546(8) . ?
 C39 H39 0.9500 . ?
 C39 C40 1.381(8) . ?
 F35 C66 1.296(10) . ?
 C42 C41 1.372(9) . ?
 C42 C45 1.493(9) . ?
 C6 H6 0.9500 . ?
 C62 C63 1.363(9) . ?
 C62 C66 1.505(10) . ?
 C87 H87 0.9500 . ?
 C87 C86 1.394(8) . ?
 F28 C74 1.315(10) . ?
 C49 H49 0.9500 . ?
 F14 C44 1.309(8) . ?
 F15 C44 1.318(8) . ?
 F46 C96 1.340(7) . ?
 C41 H41 0.9500 . ?
 C41 C40 1.393(9) . ?
 C19 H19 0.9500 . ?
 C92 C93 1.369(9) . ?
 C92 C97 1.513(10) . ?
 C83 H83 0.9500 . ?
 C83 C84 1.380(9) . ?
 F29 C74 1.270(11) . ?
 C40 C44 1.482(10) . ?
 F26 C75 1.361(8) . ?
 C63 H63 0.9500 . ?
 C69 H69 0.9500 . ?
 C69 C70 1.426(9) . ?
 C93 H93 0.9500 . ?
 C86 C89 1.496(10) . ?
 C86 C85 1.383(10) . ?
 C70 C71 1.369(11) . ?
 C70 C74 1.482(11) . ?
 C84 C85 1.392(10) . ?
 C84 C88 1.464(11) . ?
 F37 C88 1.318(8) . ?
 F25 C75 1.361(8) . ?
 C1 H1B 0.9500 . ?
 C1 H1A 0.9500 . ?
 C73 H73 0.9500 . ?
 C73 C72 1.384(9) . ?
 F30 C74 1.318(12) . ?
 C85 H85 0.9500 . ?
 C72 C71 1.370(11) . ?
 C72 C75 1.473(15) . ?
 C72 C75A 1.51(3) . ?
 C44 F13 1.320(8) . ?
 C44 F13A 1.319(8) . ?
 C44 F15A 1.308(8) . ?
 C44 F14A 1.314(8) . ?
 C71 H71 0.9500 . ?
 F38 C88 1.318(7) . ?
 F39 C88 1.334(8) . ?
 C88 F38A 1.333(10) . ?
 C88 F37A 1.323(10) . ?
 C88 F39A 1.318(10) . ?
 F46A C96A 1.339(8) . ?
 C96A F48A 1.338(8) . ?
 C96A F47A 1.339(8) . ?
 F26A C75A 1.363(9) . ?
 C75A F25A 1.360(9) . ?
 C75A F27A 1.360(9) . ?

loop_
  _geom_angle_atom_site_label_1
  _geom_angle_atom_site_label_2
  _geom_angle_atom_site_label_3
  _geom_angle
  _geom_angle_site_symmetry_1
  _geom_angle_site_symmetry_3
  _geom_angle_publ_flag
 C2 N1 C9 113.3(4) . . ?
 C1 N1 C2 121.8(4) . . ?
 C1 N1 C9 124.8(4) . . ?
 C12 C11 H11 119.1 . . ?
 C10 C11 H11 119.1 . . ?
 C10 C11 C12 121.8(4) . . ?
 C77 C76 C2 118.8(4) . . ?
 C81 C76 C77 119.2(4) . . ?
 C81 C76 C2 121.9(4) . . ?
 C8 C3 C2 111.6(4) . . ?
 C8 C3 C4 120.9(5) . . ?
 C4 C3 C2 127.5(4) . . ?
 C3 C8 C9 112.3(4) . . ?
 C3 C8 C7 120.0(5) . . ?
 C7 C8 C9 127.7(4) . . ?
 C11 C12 C24 119.8(4) . . ?
 C11 C12 C13 118.7(4) . . ?
 C13 C12 C24 121.6(4) . . ?
 C77 C78 C90 119.2(4) . . ?
 C79 C78 C77 118.2(4) . . ?
 C79 C78 C90 122.6(4) . . ?
 C25 C24 C12 120.4(4) . . ?
 C25 C24 C29 117.8(4) . . ?
 C29 C24 C12 121.7(4) . . ?
 C76 C77 C78 121.3(4) . . ?
 C76 C77 H77 119.3 . . ?
 C78 C77 H77 119.3 . . ?
 C55 C54 C2 118.1(4) . . ?
 C59 C54 C2 123.3(4) . . ?
 C59 C54 C55 118.6(4) . . ?
 C55 C56 C60 119.2(4) . . ?
 C55 C56 C57 118.9(4) . . ?
 C57 C56 C60 121.8(4) . . ?
 N1 C2 C76 111.3(3) . . ?
 N1 C2 C3 100.3(4) . . ?
 N1 C2 C54 112.7(4) . . ?
 C3 C2 C76 111.1(4) . . ?
 C3 C2 C54 108.3(4) . . ?
 C54 C2 C76 112.5(4) . . ?
 C11 C10 C15 119.2(4) . . ?
 C11 C10 C9 120.5(4) . . ?
 C15 C10 C9 119.8(4) . . ?
 C76 C81 H81 119.8 . . ?
 C76 C81 C80 120.4(4) . . ?
 C80 C81 H81 119.8 . . ?
 C37 C32 C33 118.4(4) . . ?
 C37 C32 C9 120.4(4) . . ?
 C33 C32 C9 121.0(4) . . ?
 C32 C37 H37 119.4 . . ?
 C36 C37 C32 121.3(5) . . ?
 C36 C37 H37 119.4 . . ?
 C78 C79 H79 119.2 . . ?
 C80 C79 C78 121.5(4) . . ?
 C80 C79 H79 119.2 . . ?
 C3 C4 H4 120.4 . . ?
 C5 C4 C3 119.2(5) . . ?
 C5 C4 H4 120.4 . . ?
 C81 C80 C82 119.2(4) . . ?
 C79 C80 C81 119.3(4) . . ?
 C79 C80 C82 121.5(4) . . ?
 C10 C15 H15 119.8 . . ?
 C14 C15 C10 120.3(4) . . ?
 C14 C15 H15 119.8 . . ?
 C54 C55 H55 119.2 . . ?
 C56 C55 C54 121.7(4) . . ?
 C56 C55 H55 119.2 . . ?
 C32 C33 H33 119.3 . . ?
 C34 C33 C32 121.4(4) . . ?
 C34 C33 H33 119.3 . . ?
 C24 C25 H25 119.5 . . ?
 C26 C25 C24 120.9(4) . . ?
 C26 C25 H25 119.5 . . ?
 N1 C9 C8 100.5(3) . . ?
 N1 C9 C10 111.9(4) . . ?
 N1 C9 C32 109.1(4) . . ?
 C8 C9 C10 106.6(4) . . ?
 C8 C9 C32 113.4(4) . . ?
 C32 C9 C10 114.5(4) . . ?
 C25 C26 C30 118.5(5) . . ?
 C25 C26 C27 120.9(5) . . ?
 C27 C26 C30 120.6(5) . . ?
 C15 C14 C16 120.0(4) . . ?
 C13 C14 C15 119.5(4) . . ?
 C13 C14 C16 120.5(4) . . ?
 C47 C46 C36 120.6(4) . . ?
 C51 C46 C36 120.4(5) . . ?
 C51 C46 C47 119.0(4) . . ?
 C37 C36 C46 119.7(4) . . ?
 C37 C36 C35 119.2(4) . . ?
 C35 C36 C46 121.1(4) . . ?
 C17 C16 C14 120.3(4) . . ?
 C21 C16 C14 120.5(4) . . ?
 C21 C16 C17 119.1(4) . . ?
 C87 C82 C80 119.9(5) . . ?
 C83 C82 C80 121.5(5) . . ?
 C83 C82 C87 118.6(5) . . ?
 C65 C60 C56 121.7(5) . . ?
 C65 C60 C61 118.9(5) . . ?
 C61 C60 C56 119.4(5) . . ?
 C33 C34 C35 119.7(5) . . ?
 C33 C34 C38 120.1(4) . . ?
 C35 C34 C38 120.2(4) . . ?
 C95 C90 C78 120.4(4) . . ?
 C95 C90 C91 117.7(5) . . ?
 C91 C90 C78 121.8(5) . . ?
 C56 C57 H57 119.7 . . ?
 C56 C57 C58 120.6(4) . . ?
 C58 C57 H57 119.7 . . ?
 C12 C13 H13 119.7 . . ?
 C14 C13 C12 120.5(4) . . ?
 C14 C13 H13 119.7 . . ?
 C57 C58 C68 122.2(4) . . ?
 C59 C58 C57 118.8(4) . . ?
 C59 C58 C68 119.0(5) . . ?
 C36 C35 H35 120.0 . . ?
 C34 C35 C36 120.0(4) . . ?
 C34 C35 H35 120.0 . . ?
 C54 C59 C58 121.4(4) . . ?
 C54 C59 H59 119.3 . . ?
 C58 C59 H59 119.3 . . ?
 C43 C38 C34 120.9(5) . . ?
 C39 C38 C34 120.6(5) . . ?
 C39 C38 C43 118.5(5) . . ?
 C24 C29 H29 119.6 . . ?
 C28 C29 C24 120.8(5) . . ?
 C28 C29 H29 119.6 . . ?
 C8 C7 H7 120.3 . . ?
 C6 C7 C8 119.4(5) . . ?
 C6 C7 H7 120.3 . . ?
 C60 C65 H65 120.1 . . ?
 C60 C65 C64 119.9(5) . . ?
 C64 C65 H65 120.1 . . ?
 C46 C47 H47 120.2 . . ?
 C48 C47 C46 119.6(5) . . ?
 C48 C47 H47 120.2 . . ?
 C21 C20 C22 119.5(5) . . ?
 C19 C20 C21 120.5(5) . . ?
 C19 C20 C22 119.9(5) . . ?
 C90 C95 H95 120.1 . . ?
 C90 C95 C94 119.9(5) . . ?
 C94 C95 H95 120.1 . . ?
 F4 C30 C26 111.3(5) . . ?
 F5 C30 F4 106.3(5) . . ?
 F5 C30 F6 105.9(5) . . ?
 F5 C30 C26 113.1(4) . . ?
 F6 C30 F4 106.2(4) . . ?
 F6 C30 C26 113.5(5) . . ?
 C47 C48 C52 118.8(6) . . ?
 C49 C48 C47 120.8(5) . . ?
 C49 C48 C52 120.3(5) . . ?
 C29 C28 C27 121.5(5) . . ?
 C29 C28 C31 120.6(5) . . ?
 C27 C28 C31 117.9(5) . . ?
 C38 C43 H43 120.0 . . ?
 C42 C43 C38 120.0(5) . . ?
 C42 C43 H43 120.0 . . ?
 C16 C17 H17 120.1 . . ?
 C18 C17 C16 119.7(5) . . ?
 C18 C17 H17 120.1 . . ?
 C16 C21 C20 120.1(5) . . ?
 C16 C21 H21 119.9 . . ?
 C20 C21 H21 119.9 . . ?
 C17 C18 C23 119.7(5) . . ?
 C19 C18 C17 121.7(5) . . ?
 C19 C18 C23 118.5(5) . . ?
 C26 C27 H27 121.0 . . ?
 C28 C27 C26 118.0(5) . . ?
 C28 C27 H27 121.0 . . ?
 C60 C61 H61 119.6 . . ?
 C60 C61 C62 120.7(5) . . ?
 C62 C61 H61 119.6 . . ?
 C46 C51 H51 120.0 . . ?
 C50 C51 C46 119.9(5) . . ?
 C50 C51 H51 120.0 . . ?
 C95 C94 C96 112.1(6) . . ?
 C95 C94 C96A 127.2(10) . . ?
 C93 C94 C95 121.8(5) . . ?
 C93 C94 C96 126.1(6) . . ?
 C93 C94 C96A 110.9(10) . . ?
 C4 C5 H5 120.2 . . ?
 C4 C5 C6 119.6(5) . . ?
 C6 C5 H5 120.2 . . ?
 C65 C64 C67 119.0(6) . . ?
 C63 C64 C65 119.9(5) . . ?
 C63 C64 C67 121.1(6) . . ?
 C90 C91 H91 119.6 . . ?
 C92 C91 C90 120.8(5) . . ?
 C92 C91 H91 119.6 . . ?
 C69 C68 C58 119.7(6) . . ?
 C73 C68 C58 121.6(5) . . ?
 C73 C68 C69 118.7(5) . . ?
 C51 C50 C53 118.8(5) . . ?
 C49 C50 C51 121.4(5) . . ?
 C49 C50 C53 119.6(5) . . ?
 C38 C39 H39 119.5 . . ?
 C40 C39 C38 121.0(5) . . ?
 C40 C39 H39 119.5 . . ?
 F12 C22 C20 111.9(5) . . ?
 F11 C22 F12 106.5(5) . . ?
 F11 C22 F10 106.1(5) . . ?
 F11 C22 C20 113.3(5) . . ?
 F10 C22 F12 106.3(5) . . ?
 F10 C22 C20 112.3(5) . . ?
 C43 C42 C45 120.8(6) . . ?
 C41 C42 C43 121.3(5) . . ?
 C41 C42 C45 117.9(5) . . ?
 C7 C6 C5 120.9(5) . . ?
 C7 C6 H6 119.6 . . ?
 C5 C6 H6 119.6 . . ?
 C61 C62 C66 117.6(6) . . ?
 C63 C62 C61 119.8(6) . . ?
 C63 C62 C66 122.5(6) . . ?
 C82 C87 H87 120.0 . . ?
 C86 C87 C82 120.0(6) . . ?
 C86 C87 H87 120.0 . . ?
 C48 C49 H49 120.4 . . ?
 C50 C49 C48 119.2(5) . . ?
 C50 C49 H49 120.4 . . ?
 C42 C41 H41 120.6 . . ?
 C42 C41 C40 118.8(5) . . ?
 C40 C41 H41 120.6 . . ?
 C20 C19 H19 120.6 . . ?
 C18 C19 C20 118.8(5) . . ?
 C18 C19 H19 120.6 . . ?
 F22 C53 C50 109.2(6) . . ?
 F24 C53 F22 108.9(6) . . ?
 F24 C53 F23 106.9(6) . . ?
 F24 C53 C50 113.0(5) . . ?
 F23 C53 F22 107.2(5) . . ?
 F23 C53 C50 111.5(6) . . ?
 C91 C92 C97 120.5(6) . . ?
 C93 C92 C91 120.7(6) . . ?
 C93 C92 C97 118.8(6) . . ?
 C82 C83 H83 119.3 . . ?
 C84 C83 C82 121.5(6) . . ?
 C84 C83 H83 119.3 . . ?
 C39 C40 C41 120.3(6) . . ?
 C39 C40 C44 120.1(5) . . ?
 C41 C40 C44 119.6(5) . . ?
 F18 C45 F17 107.3(6) . . ?
 F18 C45 F16 105.6(5) . . ?
 F18 C45 C42 112.3(5) . . ?
 F17 C45 F16 104.5(5) . . ?
 F17 C45 C42 113.8(5) . . ?
 F16 C45 C42 112.6(6) . . ?
 C64 C63 H63 119.6 . . ?
 C62 C63 C64 120.8(5) . . ?
 C62 C63 H63 119.6 . . ?
 C68 C69 H69 120.1 . . ?
 C68 C69 C70 119.8(6) . . ?
 C70 C69 H69 120.1 . . ?
 C94 C93 C92 119.1(5) . . ?
 C94 C93 H93 120.4 . . ?
 C92 C93 H93 120.5 . . ?
 F32 C67 C64 110.6(6) . . ?
 F31 C67 F32 108.7(6) . . ?
 F31 C67 F33 109.0(8) . . ?
 F31 C67 C64 116.0(5) . . ?
 F33 C67 F32 101.4(5) . . ?
 F33 C67 C64 110.1(6) . . ?
 C87 C86 C89 119.2(6) . . ?
 C85 C86 C87 120.7(6) . . ?
 C85 C86 C89 120.1(6) . . ?
 F43 C97 F45 107.9(7) . . ?
 F43 C97 F44 106.5(7) . . ?
 F43 C97 C92 113.8(5) . . ?
 F45 C97 F44 104.9(6) . . ?
 F45 C97 C92 112.4(6) . . ?
 F44 C97 C92 110.7(7) . . ?
 C69 C70 C74 117.5(7) . . ?
 C71 C70 C69 118.9(6) . . ?
 C71 C70 C74 123.5(7) . . ?
 C83 C84 C85 119.9(6) . . ?
 C83 C84 C88 120.3(7) . . ?
 C85 C84 C88 119.8(6) . . ?
 Se1A C1 H1B 110.9 . . ?
 Se1 C1 H1A 110.8 . . ?
 N1 C1 Se1A 138.3(5) . . ?
 N1 C1 Se1 138.5(5) . . ?
 N1 C1 H1B 110.9 . . ?
 N1 C1 H1A 110.8 . . ?
 F7 C23 F9 107.3(6) . . ?
 F7 C23 F8 107.1(6) . . ?
 F7 C23 C18 112.9(5) . . ?
 F9 C23 F8 106.9(5) . . ?
 F9 C23 C18 112.0(6) . . ?
 F8 C23 C18 110.3(5) . . ?
 F2 C31 F1 104.7(6) . . ?
 F2 C31 F3 109.0(7) . . ?
 F2 C31 C28 114.7(5) . . ?
 F1 C31 C28 111.5(6) . . ?
 F3 C31 F1 103.2(6) . . ?
 F3 C31 C28 112.8(6) . . ?
 C68 C73 H73 119.1 . . ?
 C68 C73 C72 121.8(7) . . ?
 C72 C73 H73 119.1 . . ?
 F21 C52 F20 102.3(5) . . ?
 F21 C52 C48 113.4(6) . . ?
 F20 C52 C48 111.2(6) . . ?
 F19 C52 F21 108.1(7) . . ?
 F19 C52 F20 106.8(7) . . ?
 F19 C52 C48 114.1(5) . . ?
 F36 C66 F34 105.4(6) . . ?
 F36 C66 C62 113.5(6) . . ?
 F34 C66 C62 110.5(7) . . ?
 F35 C66 F36 107.3(8) . . ?
 F35 C66 F34 107.9(7) . . ?
 F35 C66 C62 111.9(6) . . ?
 F41 C89 F42 107.8(8) . . ?
 F41 C89 F40 104.0(7) . . ?
 F41 C89 C86 113.3(6) . . ?
 F42 C89 F40 106.7(6) . . ?
 F42 C89 C86 112.2(6) . . ?
 F40 C89 C86 112.3(7) . . ?
 C86 C85 C84 119.4(6) . . ?
 C86 C85 H85 120.3 . . ?
 C84 C85 H85 120.3 . . ?
 C73 C72 C75 122.3(7) . . ?
 C73 C72 C75A 117.1(10) . . ?
 C71 C72 C73 119.1(7) . . ?
 C71 C72 C75 117.6(7) . . ?
 C71 C72 C75A 121.7(10) . . ?
 F14 C44 F15 107.4(16) . . ?
 F14 C44 C40 114.1(14) . . ?
 F14 C44 F13 106.7(12) . . ?
 F15 C44 C40 110.4(12) . . ?
 F15 C44 F13 105.9(14) . . ?
 F13 C44 C40 111.8(12) . . ?
 F13A C44 C40 113.7(13) . . ?
 F15A C44 C40 118.0(13) . . ?
 F15A C44 F13A 104.0(13) . . ?
 F15A C44 F14A 104.6(18) . . ?
 F14A C44 C40 112.2(14) . . ?
 F14A C44 F13A 102.9(16) . . ?
 C70 C71 C72 121.7(6) . . ?
 C70 C71 H71 119.1 . . ?
 C72 C71 H71 119.1 . . ?
 F48 C96 F47 102.4(9) . . ?
 F48 C96 C94 113.7(8) . . ?
 F48 C96 F46 107.1(7) . . ?
 F47 C96 C94 115.1(7) . . ?
 F46 C96 F47 102.8(7) . . ?
 F46 C96 C94 114.4(7) . . ?
 F28 C74 C70 112.1(9) . . ?
 F28 C74 F30 104.1(9) . . ?
 F29 C74 F28 107.3(8) . . ?
 F29 C74 C70 114.7(8) . . ?
 F29 C74 F30 104.5(10) . . ?
 F30 C74 C70 113.3(7) . . ?
 F37 C88 C84 112.8(10) . . ?
 F37 C88 F39 105.8(11) . . ?
 F38 C88 C84 114.8(8) . . ?
 F38 C88 F37 108.1(13) . . ?
 F38 C88 F39 103.2(11) . . ?
 F39 C88 C84 111.5(7) . . ?
 F38A C88 C84 108.8(16) . . ?
 F37A C88 C84 117(2) . . ?
 F37A C88 F38A 95(3) . . ?
 F39A C88 C84 115.5(18) . . ?
 F39A C88 F38A 104(2) . . ?
 F39A C88 F37A 113(3) . . ?
 F27 C75 F26 106.1(8) . . ?
 F27 C75 F25 105.5(9) . . ?
 F27 C75 C72 110.2(9) . . ?
 F26 C75 C72 115.2(10) . . ?
 F25 C75 F26 106.5(9) . . ?
 F25 C75 C72 112.7(8) . . ?
 F46A C96A C94 109.1(11) . . ?
 F46A C96A F47A 112(2) . . ?
 F48A C96A C94 112.7(17) . . ?
 F48A C96A F46A 106.6(9) . . ?
 F48A C96A F47A 110(2) . . ?
 F47A C96A C94 106.8(16) . . ?
 F26A C75A C72 102.8(18) . . ?
 F25A C75A C72 120.8(19) . . ?
 F25A C75A F26A 105.4(14) . . ?
 F27A C75A C72 115(2) . . ?
 F27A C75A F26A 105.5(14) . . ?
 F27A C75A F25A 105.6(14) . . ?

_shelx_res_file
;
TITL GB_RJ_RNSe2_0m_a.res in P-1
    gb_rj_rnse2_0m_a_sq.res
    created by SHELXL-2016/6 at 14:29:14 on 04-Dec-2017
REM Old TITL GB_RJ_RNSe2_0m in P-1
REM SHELXT solution in P-1
REM R1 0.275, Rweak 0.025, Alpha 0.069, Orientation as input
REM Formula found by SHELXT: C94 F50 N4
CELL 1.54178 15.7628 17.8043 18.6294 91.063 95.711 97.321
ZERR 2 0.0004 0.0004 0.0004 0.001 0.001 0.001
LATT 1
SFAC C H F N Se
UNIT 194 82 96 2 2
DFIX 2.15 0.01 F46A F48A
DFIX 1.51 0.01 C96 C94 C96A C94
SADI 0.01 F47 C96 F47A C96A F48A C96A F48 C96 F46A C96A F46 C96
SADI 0.01 F26 C75 F26A C75A F25 C75 F25A C75A F27 C75 F27A C75A
SADI 0.01 F26A F27A F27A F25A F25A F26A
SADI 0.01 F15A C44 F15 C44 F14A C44 F14 C44 F13A C44 F13 C44
SADI 0.01 F37 C88 F38A C88 F38 C88 F39A C88 F39 C88 F37A C88
RIGU 0.002 0.004 F47 C96 F48 F46
RIGU 0.002 0.004 F47A C96A F48A F46A
RIGU 0.002 0.004 C75A F26A F27A F25A
RIGU 0.002 0.004 F26 C75 F25 F27
RIGU 0.002 0.004 F15 C44 F14 F13
RIGU 0.002 0.004 F15A C44 F14A F13A
RIGU 0.002 0.004 F37A C88 F38A F39A
RIGU 0.002 0.004 F37 C88 F38 F39
EADP C96 C96A
EADP C75A C75

L.S. 10 0 68
PLAN  20
SIZE 0.1 0.2 0.2
TEMP -173.15
BOND $H
ABIN
fmap 2
acta
OMIT -2 3 3
OMIT 1 -4 1
REM <olex2.extras>
REM <HklSrc "%.\\GB_RJ_RNSe2_0m_a_sq.hkl">
REM </olex2.extras>

WGHT    0.144900    6.291700
FVAR       0.23291   0.48077   0.73232   0.67795   0.50852   0.77417
PART 2
SE1A  5    0.179291    0.642029    0.158631   -21.00000    0.05315    0.07903 =
         0.07039   -0.01368    0.00497    0.00099
PART 0
PART 1
SE1   5    0.276203    0.727022    0.111791    21.00000    0.07098    0.08457 =
         0.06467    0.00210   -0.00053    0.00905
PART 0
F4    3    0.338244    0.403758    0.019336    11.00000    0.06627    0.07925 =
         0.04032   -0.00730    0.00202    0.00750
F5    3    0.431961    0.495918    0.062441    11.00000    0.08888    0.04513 =
         0.04611    0.00671    0.02130   -0.00179
F6    3    0.471416    0.388161    0.039100    11.00000    0.07174    0.07205 =
         0.04896   -0.00474    0.02332    0.01751
F12   3    0.160011    0.455791    0.676510    11.00000    0.07955    0.08362 =
         0.05611    0.00123    0.00555    0.01735
F11   3    0.118946    0.560087    0.640295    11.00000    0.08577    0.05978 =
         0.05937   -0.01274    0.02303    0.00133
F22   3    0.434948    1.085991    0.550737    11.00000    0.07174    0.06806 =
         0.08469   -0.02636   -0.00536   -0.01157
F18   3   -0.301980    0.685433    0.341897    11.00000    0.05005    0.05249 =
         0.14346   -0.01547    0.03376   -0.00711
F10   3    0.026355    0.470638    0.669776    11.00000    0.06595    0.10688 =
         0.06102   -0.01081    0.03790   -0.00373
F7    3   -0.064060    0.279698    0.382553    11.00000    0.08707    0.08351 =
         0.06765   -0.01367    0.02501   -0.04717
F17   3   -0.226149    0.778111    0.402432    11.00000    0.05365    0.08221 =
         0.13134   -0.04201    0.04319   -0.00727
F21   3    0.149948    1.062192    0.649006    11.00000    0.10728    0.07767 =
         0.07285   -0.02823    0.02504    0.00886
N1    4    0.318657    0.706128    0.259899    11.00000    0.03072    0.02664 =
         0.04073   -0.00437    0.00788    0.00169
F9    3   -0.018798    0.228061    0.479733    11.00000    0.13105    0.04595 =
         0.09737    0.00594    0.02793   -0.02914
F2    3    0.429529    0.233062    0.334344    11.00000    0.14321    0.08430 =
         0.07708    0.03592    0.03198    0.06671
F8    3   -0.120170    0.298395    0.481192    11.00000    0.06925    0.10632 =
         0.09394   -0.01997    0.03796   -0.04901
F36   3    0.782477    0.933246    0.190984    11.00000    0.06201    0.09335 =
         0.13844   -0.01325    0.03964    0.01685
F16   3   -0.294054    0.797095    0.301673    11.00000    0.06424    0.08180 =
         0.17343    0.03191    0.05112    0.03853
F24   3    0.444033    1.033567    0.447246    11.00000    0.07651    0.11400 =
         0.11194   -0.04516    0.03678   -0.04740
F23   3    0.381282    1.131185    0.453074    11.00000    0.12547    0.07173 =
         0.10956    0.01192   -0.00369   -0.05035
PART 1
F48   3    0.675800    0.392055    0.389593    31.00000    0.09664    0.09494 =
         0.09222    0.04910    0.01419    0.04968
PART 0
F1    3    0.391087    0.179642    0.233768    11.00000    0.22825    0.03614 =
         0.10975    0.01661    0.02539    0.04183
C11   1    0.296956    0.547159    0.287692    11.00000    0.03105    0.02703 =
         0.03800   -0.00342    0.00682   -0.00038
AFIX  43
H11   2    0.333253    0.568056    0.253351    11.00000   -1.20000
AFIX   0
C76   1    0.465253    0.721752    0.215867    11.00000    0.02483    0.02885 =
         0.03756   -0.00645    0.00652    0.00229
F32   3    0.718716    1.249586    0.325789    11.00000    0.13994    0.03551 =
         0.14278    0.01660    0.01806   -0.00268
C3    1    0.436307    0.732092    0.346828    11.00000    0.03615    0.02412 =
         0.03743   -0.00368    0.00795    0.00622
C8    1    0.369526    0.696881    0.380774    11.00000    0.03296    0.02475 =
         0.04183   -0.00476    0.01087    0.00372
C12   1    0.283209    0.468668    0.294025    11.00000    0.03207    0.02590 =
         0.03632   -0.00651    0.00851    0.00264
F43   3    0.681703    0.424331    0.048829    11.00000    0.19807    0.10383 =
         0.09150   -0.00230    0.04596    0.09734
C78   1    0.555742    0.626943    0.185495    11.00000    0.03020    0.03028 =
         0.03356   -0.00520   -0.00035    0.00644
C24   1    0.328378    0.419515    0.249692    11.00000    0.04116    0.02209 =
         0.03740   -0.00376    0.00705    0.00273
C77   1    0.497682    0.653498    0.229164    11.00000    0.03245    0.02607 =
         0.03275    0.00036    0.00422    0.00285
AFIX  43
H77   2    0.480106    0.624400    0.268585    11.00000   -1.20000
AFIX   0
C54   1    0.404673    0.836555    0.265491    11.00000    0.03118    0.02485 =
         0.03721    0.00210    0.00799    0.00259
C56   1    0.486756    0.961746    0.273584    11.00000    0.02929    0.03269 =
         0.03718    0.00420    0.00445    0.00480
C2    1    0.406900    0.750643    0.268958    11.00000    0.02690    0.02814 =
         0.04456   -0.00403    0.01054    0.00205
C10   1    0.259430    0.594980    0.329759    11.00000    0.02902    0.02680 =
         0.03975   -0.00458    0.01229   -0.00201
F31   3    0.629926    1.207535    0.397681    11.00000    0.11275    0.10412 =
         0.18702   -0.09728    0.05536   -0.04046
C81   1    0.488528    0.762740    0.156797    11.00000    0.03065    0.02859 =
         0.03568   -0.00302    0.00561    0.00794
AFIX  43
H81   2    0.464531    0.808024    0.145953    11.00000   -1.20000
AFIX   0
C32   1    0.217120    0.728538    0.348652    11.00000    0.03173    0.02450 =
         0.04803   -0.00211    0.01639    0.00575
C37   1    0.238490    0.793941    0.392464    11.00000    0.03021    0.02733 =
         0.04836   -0.00149    0.01322   -0.00121
AFIX  43
H37   2    0.295686    0.806097    0.414584    11.00000   -1.20000
AFIX   0
F41   3    0.420527    0.936915   -0.042797    11.00000    0.16372    0.15480 =
         0.08823    0.04631    0.02841    0.10690
F20   3    0.066491    1.077689    0.557799    11.00000    0.10979    0.14356 =
         0.12278   -0.04438    0.00820    0.07928
C79   1    0.580204    0.670490    0.127884    11.00000    0.02897    0.03624 =
         0.03038   -0.00296    0.00358    0.00614
AFIX  43
H79   2    0.620231    0.653698    0.098296    11.00000   -1.20000
AFIX   0
C4    1    0.518182    0.746604    0.382227    11.00000    0.02876    0.03250 =
         0.04211   -0.00452    0.00558   -0.00279
AFIX  43
H4    2    0.564297    0.770262    0.358068    11.00000   -1.20000
AFIX   0
PART 1
F47   3    0.667510    0.505354    0.414707    31.00000    0.10830    0.09397 =
         0.06298    0.03051    0.00459    0.02253
PART 0
C80   1    0.547583    0.737630    0.112729    11.00000    0.03681    0.03316 =
         0.02901    0.00053    0.00211    0.00423
F42   3    0.432402    0.872837   -0.137550    11.00000    0.16062    0.10430 =
         0.09651    0.00658   -0.03623    0.05306
C15   1    0.204790    0.564152    0.379585    11.00000    0.02938    0.03198 =
         0.04718   -0.00467    0.01407    0.00020
AFIX  43
H15   2    0.178186    0.596722    0.408728    11.00000   -1.20000
AFIX   0
C55   1    0.483245    0.884247    0.272480    11.00000    0.02766    0.03059 =
         0.04208   -0.00213    0.00553    0.00581
AFIX  43
H55   2    0.535367    0.862384    0.276554    11.00000   -1.20000
AFIX   0
F3    3    0.515359    0.236092    0.252392    11.00000    0.13607    0.13411 =
         0.18855    0.09472    0.08571    0.09942
C33   1    0.131824    0.710665    0.318116    11.00000    0.03030    0.02830 =
         0.05385   -0.01066    0.01121    0.00295
AFIX  43
H33   2    0.115751    0.665131    0.289931    11.00000   -1.20000
AFIX   0
C25   1    0.346059    0.439771    0.180487    11.00000    0.04549    0.02092 =
         0.03959   -0.00368    0.00842    0.00464
AFIX  43
H25   2    0.325742    0.483633    0.160451    11.00000   -1.20000
AFIX   0
C9    1    0.286730    0.680863    0.330274    11.00000    0.03147    0.02689 =
         0.04427   -0.00513    0.01339    0.00162
C26   1    0.392793    0.396984    0.140410    11.00000    0.04835    0.03004 =
         0.03692   -0.00373    0.00737    0.00182
C14   1    0.189225    0.485787    0.386638    11.00000    0.03347    0.03375 =
         0.04107   -0.00286    0.01259   -0.00255
C46   1    0.202883    0.911174    0.450557    11.00000    0.04512    0.02410 =
         0.04864   -0.00312    0.00690    0.00838
C36   1    0.177525    0.841825    0.404421    11.00000    0.03813    0.02273 =
         0.04747   -0.00292    0.01500    0.00368
C16   1    0.131527    0.453354    0.440638    11.00000    0.03406    0.03510 =
         0.04656    0.00030    0.01970   -0.00007
C82   1    0.574045    0.784377    0.051371    11.00000    0.04967    0.03858 =
         0.03628    0.00396    0.01075    0.01339
F45   3    0.763668    0.381358    0.129946    11.00000    0.10497    0.14486 =
         0.15310   -0.03274    0.01221    0.08222
F34   3    0.857215    1.039877    0.209542    11.00000    0.04680    0.10467 =
         0.23769    0.00285    0.06355   -0.00401
C60   1    0.571528    1.009163    0.276655    11.00000    0.03573    0.03080 =
         0.04721    0.01099    0.00579    0.00592
C34   1    0.070756    0.757794    0.328130    11.00000    0.03489    0.03106 =
         0.05213   -0.00400    0.01378    0.00382
F44   3    0.637584    0.327584    0.105726    11.00000    0.15459    0.06105 =
         0.15953   -0.03367    0.02670    0.02162
C90   1    0.591362    0.555565    0.203916    11.00000    0.03072    0.03178 =
         0.04914    0.00188    0.00227    0.00726
F33   3    0.758342    1.186125    0.412260    11.00000    0.14729    0.06203 =
         0.16483   -0.00348   -0.08048   -0.01051
C57   1    0.409938    0.993611    0.268618    11.00000    0.04047    0.02597 =
         0.05440    0.00887    0.01765    0.00856
AFIX  43
H57   2    0.411537    1.047133    0.270662    11.00000   -1.20000
AFIX   0
C13   1    0.227442    0.438358    0.343058    11.00000    0.04000    0.02787 =
         0.04281   -0.00262    0.00931   -0.00146
AFIX  43
H13   2    0.215552    0.384971    0.346646    11.00000   -1.20000
AFIX   0
F40   3    0.512827    0.977063   -0.110887    11.00000    0.16551    0.10769 =
         0.10476    0.05700    0.00912    0.04329
C58   1    0.330522    0.947292    0.260644    11.00000    0.03374    0.03487 =
         0.06225    0.01181    0.01378    0.01589
C35   1    0.093575    0.824512    0.370466    11.00000    0.03344    0.02863 =
         0.05068   -0.00270    0.00935    0.00543
AFIX  43
H35   2    0.052230    0.858018    0.376181    11.00000   -1.20000
AFIX   0
C59   1    0.329551    0.868957    0.258607    11.00000    0.02517    0.03695 =
         0.05678    0.00569    0.00860    0.00496
AFIX  43
H59   2    0.275982    0.837205    0.252342    11.00000   -1.20000
AFIX   0
PART 1
F27   3   -0.023917    0.963342    0.125548    41.00000    0.06045    0.08811 =
         0.13414    0.01489   -0.00487    0.01437
PART 0
C38   1   -0.019160    0.737769    0.294106    11.00000    0.03097    0.03435 =
         0.06670   -0.00775    0.00960    0.00470
C29   1    0.358189    0.354217    0.276778    11.00000    0.04950    0.03222 =
         0.04421    0.00406    0.01181    0.00768
AFIX  43
H29   2    0.346651    0.338860    0.323781    11.00000   -1.20000
AFIX   0
C7    1    0.383142    0.677481    0.451801    11.00000    0.04790    0.03804 =
         0.03891    0.00100    0.01112    0.00002
AFIX  43
H7    2    0.336973    0.653561    0.475738    11.00000   -1.20000
AFIX   0
F19   3    0.056260    0.971645    0.608540    11.00000    0.15105    0.10383 =
         0.22320   -0.09698    0.14354   -0.05134
C65   1    0.589833    1.075732    0.318109    11.00000    0.04030    0.03186 =
         0.05240    0.00671    0.00105    0.00342
AFIX  43
H65   2    0.547806    1.091761    0.346047    11.00000   -1.20000
AFIX   0
C47   1    0.146613    0.935228    0.497229    11.00000    0.04643    0.03145 =
         0.05454   -0.00585    0.01130    0.00992
AFIX  43
H47   2    0.091053    0.907785    0.498659    11.00000   -1.20000
AFIX   0
C20   1    0.085758    0.453491    0.560295    11.00000    0.04184    0.04675 =
         0.04542   -0.00257    0.01360    0.00452
C95   1    0.597500    0.532084    0.274138    11.00000    0.03955    0.03982 =
         0.05367    0.00821    0.00462    0.00235
AFIX  43
H95   2    0.579609    0.561892    0.311250    11.00000   -1.20000
AFIX   0
C30   1    0.408965    0.421120    0.066156    11.00000    0.06422    0.04534 =
         0.04387   -0.00773    0.01224    0.01489
C48   1    0.172687    0.999889    0.541722    11.00000    0.07052    0.03036 =
         0.05508   -0.01377    0.01165    0.01721
C28   1    0.404009    0.311798    0.236424    11.00000    0.05619    0.03016 =
         0.05669    0.00283    0.01324    0.01167
C43   1   -0.088707    0.752872    0.330106    11.00000    0.03798    0.03355 =
         0.07195   -0.01242    0.01057    0.00269
AFIX  43
H43   2   -0.079123    0.776977    0.376651    11.00000   -1.20000
AFIX   0
C17   1    0.071654    0.389804    0.422456    11.00000    0.04218    0.04105 =
         0.05377   -0.00221    0.01793   -0.00369
AFIX  43
H17   2    0.066792    0.366951    0.375488    11.00000   -1.20000
AFIX   0
C21   1    0.138112    0.485335    0.509808    11.00000    0.03648    0.04241 =
         0.05442   -0.00502    0.01841    0.00205
AFIX  43
H21   2    0.178380    0.529010    0.522756    11.00000   -1.20000
AFIX   0
C18   1    0.019048    0.359919    0.473210    11.00000    0.04328    0.04828 =
         0.04755   -0.00044    0.01523   -0.00947
C27   1    0.422569    0.332235    0.167851    11.00000    0.05564    0.03242 =
         0.04897   -0.00589    0.01679    0.01199
AFIX  43
H27   2    0.454734    0.302801    0.140404    11.00000   -1.20000
AFIX   0
C61   1    0.634152    0.987085    0.236024    11.00000    0.03933    0.04159 =
         0.05725    0.01089    0.01445    0.01056
AFIX  43
H61   2    0.622278    0.941575    0.207341    11.00000   -1.20000
AFIX   0
C51   1    0.283977    0.952884    0.449153    11.00000    0.04504    0.03013 =
         0.05766   -0.00941    0.00573    0.00205
AFIX  43
H51   2    0.322963    0.937223    0.417931    11.00000   -1.20000
AFIX   0
C94   1    0.630111    0.464306    0.290618    11.00000    0.04543    0.05373 =
         0.06930    0.02546   -0.00395    0.00349
C5    1    0.532148    0.726369    0.452943    11.00000    0.04563    0.04372 =
         0.04901    0.00037   -0.00234    0.00092
AFIX  43
H5    2    0.588279    0.735243    0.477811    11.00000   -1.20000
AFIX   0
C64   1    0.671236    1.119821    0.318775    11.00000    0.04600    0.03629 =
         0.07606    0.01292   -0.00524   -0.00373
C91   1    0.620362    0.509760    0.151015    11.00000    0.04343    0.04030 =
         0.05680   -0.00025    0.00548    0.01554
AFIX  43
H91   2    0.616435    0.524279    0.102104    11.00000   -1.20000
AFIX   0
C68   1    0.247376    0.979044    0.253328    11.00000    0.04460    0.03587 =
         0.08500    0.02020    0.01967    0.01761
C50   1    0.307621    1.017521    0.493627    11.00000    0.05277    0.03249 =
         0.06426   -0.00998    0.00367   -0.00235
C39   1   -0.035398    0.702470    0.226097    11.00000    0.02980    0.05444 =
         0.06786   -0.01034    0.00375    0.00791
AFIX  43
H39   2    0.011398    0.692052    0.200745    11.00000   -1.20000
AFIX   0
F35   3    0.758082    1.021301    0.122000    11.00000    0.15157    0.30830 =
         0.11103    0.08086    0.08688    0.13531
C22   1    0.097787    0.485179    0.636063    11.00000    0.05207    0.06528 =
         0.05103   -0.00302    0.01798    0.00427
C42   1   -0.172062    0.732722    0.298017    11.00000    0.03439    0.03883 =
         0.08411   -0.00486    0.01357    0.00740
C6    1    0.463920    0.693004    0.487636    11.00000    0.06155    0.05078 =
         0.03987    0.00426    0.00462    0.00535
AFIX  43
H6    2    0.473236    0.680705    0.536955    11.00000   -1.20000
AFIX   0
C62   1    0.714581    1.031286    0.236964    11.00000    0.03770    0.05386 =
         0.08752    0.01686    0.01606    0.00562
C87   1    0.514813    0.824612    0.012946    11.00000    0.06296    0.05344 =
         0.03778    0.00528    0.01546    0.02033
AFIX  43
H87   2    0.457123    0.820347    0.024630    11.00000   -1.20000
AFIX   0
F28   3    0.077487    1.166943    0.319308    11.00000    0.10688    0.11891 =
         0.25086   -0.04047    0.02457    0.07419
C49   1    0.253295    1.040932    0.539724    11.00000    0.06151    0.03667 =
         0.06277   -0.01323    0.00406    0.00796
AFIX  43
H49   2    0.270557    1.084817    0.570047    11.00000   -1.20000
AFIX   0
PART 1
F14   3   -0.210003    0.648389    0.089000    51.00000    0.04692    0.16855 =
         0.12515   -0.07467   -0.03201    0.03678
F15   3   -0.076018    0.669195    0.081100    51.00000    0.08596    0.19523 =
         0.08189   -0.06267    0.00807   -0.01177
F46   3    0.552758    0.431431    0.392082    31.00000    0.07815    0.14459 =
         0.11355    0.07571    0.03387    0.02565
PART 0
C41   1   -0.187945    0.697531    0.230999    11.00000    0.03391    0.05439 =
         0.09195   -0.01078    0.00204    0.01313
AFIX  43
H41   2   -0.245255    0.683795    0.209663    11.00000   -1.20000
AFIX   0
C19   1    0.025719    0.390154    0.541738    11.00000    0.04256    0.05009 =
         0.05773    0.00669    0.01840   -0.00390
AFIX  43
H19   2   -0.009974    0.368347    0.576108    11.00000   -1.20000
AFIX   0
C53   1    0.393737    1.067227    0.485234    11.00000    0.06143    0.05179 =
         0.07406   -0.02659    0.00690   -0.01277
C92   1    0.654264    0.444291    0.169575    11.00000    0.05453    0.04082 =
         0.07869    0.00321    0.00841    0.01835
C83   1    0.657369    0.790653    0.031993    11.00000    0.06009    0.05095 =
         0.05776    0.01289    0.02547    0.01516
AFIX  43
H83   2    0.697756    0.762567    0.056961    11.00000   -1.20000
AFIX   0
F29   3    0.207722    1.201571    0.313370    11.00000    0.16578    0.06414 =
         0.33474   -0.05337    0.12646   -0.00129
C40   1   -0.118562    0.682307    0.194810    11.00000    0.04407    0.06078 =
         0.07221   -0.01220   -0.00386    0.01081
PART 1
F26   3   -0.042141    0.903395    0.224626    41.00000    0.05948    0.12611 =
         0.17364    0.05131    0.03183    0.02315
PART 0
C45   1   -0.247443    0.747627    0.336170    11.00000    0.03725    0.04562 =
         0.11628   -0.01397    0.02270   -0.00041
C63   1    0.731551    1.096956    0.277547    11.00000    0.03558    0.05051 =
         0.09542    0.02255    0.00900    0.00097
AFIX  43
H63   2    0.785663    1.127290    0.277358    11.00000   -1.20000
AFIX   0
C69   1    0.239952    1.046073    0.290650    11.00000    0.04669    0.04829 =
         0.08955    0.01477    0.02140    0.01296
AFIX  43
H69   2    0.288542    1.072648    0.318708    11.00000   -1.20000
AFIX   0
C93   1    0.658748    0.421259    0.239377    11.00000    0.05266    0.03932 =
         0.09362    0.01082    0.00827    0.01554
AFIX  43
H93   2    0.681556    0.375814    0.251864    11.00000   -1.20000
AFIX   0
C67   1    0.690170    1.190204    0.364849    11.00000    0.05506    0.04039 =
         0.09709    0.00680   -0.01333   -0.00668
C86   1    0.540450    0.871008   -0.042542    11.00000    0.09250    0.05555 =
         0.04622    0.01244    0.01725    0.02790
C97   1    0.685251    0.395622    0.112730    11.00000    0.09294    0.06204 =
         0.08415   -0.00486    0.00197    0.04762
C70   1    0.159158    1.074613    0.286565    11.00000    0.06373    0.04759 =
         0.10897    0.01654    0.02268    0.02495
C84   1    0.682849    0.836804   -0.022757    11.00000    0.07809    0.07185 =
         0.07285    0.02370    0.03956    0.01843
PART 1
F37   3    0.829031    0.848545    0.013689    61.00000    0.07365    0.22453 =
         0.17468    0.04710    0.05036   -0.00943
F25   3    0.030691    0.858771    0.143636    41.00000    0.05428    0.09321 =
         0.17844   -0.00728   -0.01300    0.01633
PART 0
C1    1    0.273812    0.694017    0.195763    11.00000    0.06418    0.05751 =
         0.05571   -0.00815    0.00699    0.00472
PART 2
AFIX  43
H1B   2    0.301773    0.722022    0.159963   -21.00000   -1.20000
AFIX  43
PART 0
PART 1
H1A   2    0.226573    0.655499    0.197771    21.00000   -1.20000
AFIX   0
PART 0
C23   1   -0.045728    0.291093    0.453520    11.00000    0.07269    0.06898 =
         0.05993   -0.00658    0.02578   -0.02904
C31   1    0.435658    0.241866    0.265730    11.00000    0.09970    0.04654 =
         0.08462    0.02214    0.03969    0.04309
C73   1    0.175342    0.941669    0.213124    11.00000    0.03337    0.05784 =
         0.11669    0.00920    0.00270    0.01586
AFIX  43
H73   2    0.179931    0.895931    0.187569    11.00000   -1.20000
AFIX   0
C52   1    0.111611    1.025293    0.589701    11.00000    0.08543    0.05389 =
         0.08038   -0.02762    0.01619    0.01885
C66   1    0.777313    1.005719    0.188858    11.00000    0.04320    0.09693 =
         0.11331    0.02666    0.03991    0.01187
F30   3    0.169687    1.139069    0.398388    11.00000    0.31900    0.15378 =
         0.12604   -0.01988    0.01757    0.14711
C89   1    0.476004    0.913361   -0.083263    11.00000    0.11745    0.08485 =
         0.05231    0.02511    0.01499    0.04497
C85   1    0.624121    0.877670   -0.060330    11.00000    0.09786    0.06813 =
         0.06387    0.02355    0.04207    0.01594
AFIX  43
H85   2    0.641362    0.909823   -0.097826    11.00000   -1.20000
AFIX   0
C72   1    0.096735    0.969092    0.209106    11.00000    0.04685    0.06419 =
         0.13892    0.00155    0.00378    0.01808
C44   1   -0.134537    0.642593    0.123190    11.00000    0.04364    0.10627 =
         0.09284   -0.03765   -0.01298    0.01919
C71   1    0.089944    1.034780    0.246344    11.00000    0.04896    0.07081 =
         0.15501    0.00955    0.02955    0.02190
AFIX  43
H71   2    0.035790    1.053177    0.244204    11.00000   -1.20000
AFIX   0
PART 1
C96   1    0.630930    0.447930    0.369509    31.00000    0.06906    0.07254 =
         0.07888    0.03498    0.01453    0.02542
F13   3   -0.128815    0.569488    0.128027    51.00000    0.15241    0.11064 =
         0.11791   -0.05894   -0.02904    0.05284
PART 0
C74   1    0.154583    1.145587    0.328050    11.00000    0.09845    0.06283 =
         0.14985    0.00578    0.02636    0.04574
PART 1
F38   3    0.791839    0.895917   -0.087200    61.00000    0.13886    0.21691 =
         0.25499    0.15838    0.12720    0.03642
F39   3    0.783125    0.779066   -0.078873    61.00000    0.11368    0.18715 =
         0.21664    0.00829    0.11014    0.04110
PART 0
C88   1    0.770801    0.841487   -0.042775    11.00000    0.08556    0.12967 =
         0.13751    0.06194    0.07091    0.02282
PART 1
C75   1    0.016585    0.923843    0.177374    41.00000    0.03663    0.08466 =
         0.14302    0.02159    0.00901    0.01085
PART 0
PART 2
F46A  3    0.571032    0.368490    0.360223   -31.00000    0.08729    0.10689 =
         0.08415    0.05809    0.01250   -0.00134
C96A  1    0.634275    0.426544    0.362230   -31.00000    0.06906    0.07254 =
         0.07888    0.03498    0.01453    0.02542
F48A  3    0.707972    0.397712    0.378013   -31.00000    0.07108    0.04515 =
         0.05719   -0.00144   -0.00746    0.01477
F47A  3    0.626475    0.479543    0.412261   -31.00000    0.15897    0.07263 =
         0.06920    0.05193    0.05235    0.04822
F26A  3   -0.031387    0.897501    0.184382   -41.00000    0.05489    0.09610 =
         0.19004    0.01779    0.02327   -0.01550
C75A  1    0.030015    0.937455    0.148635   -41.00000    0.03663    0.08466 =
         0.14302    0.02159    0.00901    0.01085
F25A  3    0.049254    0.888196    0.097848   -41.00000    0.05491    0.15039 =
         0.16169   -0.03518   -0.01221    0.00593
F27A  3   -0.010474    0.989924    0.111416   -41.00000    0.08972    0.12542 =
         0.26677    0.07604   -0.01895    0.01974
F13A  3   -0.176713    0.573818    0.124472   -51.00000    0.17036    0.13760 =
         0.14870   -0.09212    0.04998   -0.05794
F15A  3   -0.068058    0.633215    0.088774   -51.00000    0.05577    0.15822 =
         0.11257   -0.07402   -0.00376    0.02559
F14A  3   -0.184458    0.676740    0.077306   -51.00000    0.15187    0.23607 =
         0.09041   -0.05510   -0.05529    0.11037
F38A  3    0.810307    0.911561   -0.027859   -61.00000    0.10157    0.14931 =
         0.19626    0.05305    0.07871   -0.00081
F37A  3    0.825786    0.807733   -0.000411   -61.00000    0.06450    0.19261 =
         0.17160    0.09538    0.07857    0.03179
F39A  3    0.777677    0.830075   -0.111952   -61.00000    0.18078    0.18485 =
         0.14366    0.07577    0.11200    0.04114
HKLF 4


REM  GB_RJ_RNSe2_0m_a.res in P-1
REM R1 =  0.0795 for    9387 Fo > 4sig(Fo)  and  0.1204 for all   14651 data
REM   1452 parameters refined using    210 restraints

END

WGHT      0.1447      6.3181

REM Highest difference peak  1.328,  deepest hole -0.874,  1-sigma level  0.076
Q1    1   0.2249  0.6369  0.0847  11.00000  0.05    1.33
Q2    1   0.2419  0.7999  0.0690  11.00000  0.05    1.26
Q3    1   0.1450  0.5649  0.1398  11.00000  0.05    0.54
Q4    1   0.1532  0.5747  0.1210  11.00000  0.05    0.51
Q5    1   0.2773  1.0762  0.3353  11.00000  0.05    0.51
Q6    1   0.4398  0.9992  0.5528  11.00000  0.05    0.47
Q7    1   0.5084  0.9181 -0.1471  11.00000  0.05    0.46
Q8    1   0.5193  0.2669  0.3157  11.00000  0.05    0.46
Q9    1   0.1426  0.6094  0.0942  11.00000  0.05    0.44
Q10   1   0.3887  1.0922  0.5896  11.00000  0.05    0.43
Q11   1   0.1956  1.1030  0.3412  11.00000  0.05    0.40
Q12   1   0.2606  0.7445  0.0335  11.00000  0.05    0.39
Q13   1   0.2280  0.7218  0.0476  11.00000  0.05    0.39
Q14   1   0.4614  0.2025  0.2225  11.00000  0.05    0.38
Q15   1   0.2162  0.7388  0.1672  11.00000  0.05    0.38
Q16   1   0.2408  0.7440  0.1993  11.00000  0.05    0.37
Q17   1   0.6687  0.3968 -0.0631  11.00000  0.05    0.34
Q18   1   0.8076  0.8455 -0.0789  11.00000  0.05    0.33
Q19   1   0.2646  1.1825  0.4321  11.00000  0.05    0.33
Q20   1   0.3823  1.0383  0.5353  11.00000  0.05    0.33
;
_shelx_res_checksum               25356
_shelx_hkl_file
;
  -1   0   0  521.45   22.50
  -1   0   0  541.05   22.70
  -2   0   0   64.39    3.30
  -2   0   0   67.39    3.80
  -3   0   0   14.70    2.50
  -3   0   0   17.70    2.10
  -4   0   0    9.30    2.80
  -4   0   0    7.30    1.90
  -5   0   0  175.88    8.60
  -5   0   0  182.68    9.70
  -6   0   0    6.60    3.30
  -6   0   0    6.40    2.20
  -7   0   0   19.50    4.20
  -7   0   0   21.90    3.50
  -7   0   0   21.20    3.20
  -8   0   0  138.09    7.70
  -8   0   0  140.59    9.40
  -9   0   0    0.20    2.40
  -9   0   0    0.00    2.90
  -9   0   0    1.80    5.20
  -9   0   0    3.80    2.30
  -9   0   0    1.50    2.10
 -10   0   0   10.00    2.90
 -10   0   0    4.60    2.50
 -10   0   0    2.00    2.40
 -10   0   0    6.00    5.30
 -10   0   0    0.60    3.50
 -10   0   0    8.80    2.80
 -10   0   0    2.00    2.70
  10   0   0    1.50    3.80
 -11   0   0   15.00    3.00
 -11   0   0   21.40    3.20
 -11   0   0   16.00    6.60
 -11   0   0   14.50    3.40
 -11   0   0   16.00    4.00
 -11   0   0   22.30    3.60
 -11   0   0   15.20    3.40
  11   0   0   22.50    5.00
 -12   0   0   -1.40    4.40
 -12   0   0    1.00    3.40
 -12   0   0   11.70    7.50
 -12   0   0    2.70    3.70
 -12   0   0    4.50    3.10
  12   0   0    6.20    5.30
 -13   0   0    9.70    3.70
 -13   0   0    1.90    4.90
 -13   0   0    0.60    8.00
 -13   0   0    1.20    4.00
 -13   0   0    6.80    4.10
  13   0   0   10.90    5.80
  13   0   0    8.00    3.50
 -14   0   0    3.50    4.10
 -14   0   0   -5.00    3.60
 -14   0   0   -1.20    4.00
 -14   0   0   -4.30    5.80
  14   0   0    2.60    6.40
  14   0   0   -1.30    3.50
 -15   0   0    2.30    4.40
 -15   0   0   -2.80    5.10
 -15   0   0    6.70    3.80
 -15   0   0    3.60    4.10
  15   0   0   -5.60    6.40
 -16   0   0   11.60    4.90
 -16   0   0    5.10    3.60
 -16   0   0    5.20    4.30
  16   0   0    6.80    5.60
 -17   0   0   -1.80    3.00
 -17   0   0    2.60    3.80
 -17   0   0   -3.50    4.00
  17   0   0    2.80    3.50
  17  -1   0   -4.60    3.50
 -17   1   0    0.30    3.00
 -17   1   0   -5.50    3.80
 -17   1   0    1.50    4.10
  16  -1   0   -5.00    9.20
 -16   1   0    1.50    3.60
 -16   1   0    4.80    4.30
 -16   1   0    4.40    4.70
  15  -1   0    1.40    6.30
 -15   1   0    2.50    3.90
 -15   1   0   -2.50    4.00
 -15   1   0    1.30    5.50
 -15   1   0    3.10    3.80
  14  -1   0   29.40    6.40
 -14   1   0   15.60    4.50
 -14   1   0   21.30    4.30
 -14   1   0   17.80    5.60
 -14   1   0   17.50    4.20
  13  -1   0    3.30    5.60
  13  -1   0    9.10    3.40
 -13   1   0    8.20    3.90
 -13   1   0   -4.80    4.90
 -13   1   0    0.70    3.90
 -13   1   0    6.20    3.90
 -13   1   0    9.50    7.60
  12  -1   0    3.00    5.00
 -12   1   0    6.80    4.40
 -12   1   0    2.80    3.50
 -12   1   0   -5.00    7.90
 -12   1   0   -0.80    3.00
 -12   1   0    3.30    3.60
 -12   1   0    0.60    3.40
  11  -1   0   46.90    5.50
 -11   1   0   42.30    8.60
 -11   1   0   38.50    5.30
 -11   1   0   46.10    6.70
 -11   1   0   36.00    4.30
 -11   1   0   50.49    4.40
 -11   1   0   41.50    5.20
 -11   1   0   40.90    4.60
  10  -1   0   29.30    4.50
 -10   1   0   35.90    4.10
 -10   1   0   34.10    6.40
 -10   1   0   34.80    5.10
 -10   1   0   38.40    4.10
 -10   1   0   31.90    3.60
 -10   1   0   29.30    4.30
 -10   1   0   29.50    3.40
  -9   1   0  131.49    9.70
  -9   1   0  130.49    7.50
  -9   1   0  131.89    6.80
  -9   1   0  118.39    6.70
  -9   1   0  138.89    7.00
  -8   1   0    9.50    3.10
  -8   1   0    8.00    4.20
  -7   1   0   51.19    4.80
  -7   1   0   42.00    6.00
  -6   1   0    0.20    3.10
  -6   1   0    1.40    2.50
  -5   1   0  156.08    8.20
  -5   1   0  165.88    8.90
  -4   1   0    1.60    2.60
  -4   1   0    2.20    2.10
  -3   1   0   23.70    3.10
  -3   1   0   18.70    2.80
  -2   1   0  167.38    7.80
  -2   1   0  171.58    7.90
  -1   1   0   24.50    1.70
  -1   1   0   26.60    1.70
   0   1   0   99.79    4.50
  -1  -1   0   12.50    1.40
  -2  -1   0  164.98    7.10
  -2  -1   0  160.68    7.60
  -3  -1   0 2397.56  101.29
  -3  -1   0 2390.46  101.79
  -4  -1   0 3774.32  157.38
  -4  -1   0 3634.84  156.58
  -5  -1   0   34.90    2.80
  -5  -1   0   33.60    4.70
  -6  -1   0  557.64   24.60
  -6  -1   0  581.84   25.90
  -6  -1   0  551.24   24.50
  -7  -1   0   16.80    3.20
  -7  -1   0   10.20    4.00
  -8  -1   0   23.40    4.70
  -8  -1   0   16.30    3.20
  -9  -1   0    4.70    4.50
  -9  -1   0   -2.30    2.20
  -9  -1   0   -0.10    2.40
  -9  -1   0   -2.90    2.10
  -9  -1   0   -3.00    3.10
  -9  -1   0    2.70    2.30
 -10  -1   0  101.79    5.90
 -10  -1   0  108.49   10.80
 -10  -1   0   91.69    6.80
 -10  -1   0   93.99    6.00
 -10  -1   0  103.49    5.90
 -10  -1   0  106.49    6.80
 -10  -1   0   99.59    6.10
  10   1   0  112.89    8.00
 -11  -1   0   22.00    7.40
 -11  -1   0    4.20    3.10
 -11  -1   0    0.60    4.20
 -11  -1   0    5.00    3.20
 -11  -1   0    6.70    2.70
 -11  -1   0    4.60    2.90
  11   1   0    3.40    4.10
 -12  -1   0   15.30    4.70
 -12  -1   0   21.20    4.00
 -12  -1   0   23.10    3.60
 -12  -1   0   13.60    3.90
 -12  -1   0   23.70    8.40
  12   1   0   20.40    3.90
  12   1   0   25.00    5.80
 -13  -1   0    9.30    4.10
 -13  -1   0   14.10    8.30
 -13  -1   0    4.40    4.60
 -13  -1   0   12.10    4.30
 -13  -1   0   10.70    5.60
  13   1   0   17.20    3.70
  13   1   0   18.00    6.50
 -14  -1   0   24.40    4.50
 -14  -1   0   24.70    4.60
 -14  -1   0   17.00    4.50
 -14  -1   0   16.10    5.50
  14   1   0   35.70    6.90
  14   1   0   24.80    4.20
 -15  -1   0   30.00    4.40
 -15  -1   0   30.30    4.90
 -15  -1   0   36.80    5.70
 -15  -1   0   19.50    5.80
  15   1   0   27.40    7.30
  15   1   0   28.30    3.90
 -16  -1   0    2.40    3.40
 -16  -1   0   -9.50    4.50
 -16  -1   0   -1.40    4.00
  16   1   0   -2.70    3.70
  16   1   0   -4.10    5.70
 -17  -1   0    2.30    3.80
 -17  -1   0    4.70    3.70
 -17  -1   0    1.80    2.80
  17   1   0   -0.90    3.40
  17  -2   0    3.30    3.50
 -17   2   0    9.10    4.20
 -17   2   0    7.40    3.30
 -17   2   0    9.90    3.80
 -16   2   0    7.00    5.40
 -16   2   0   16.00    3.90
 -16   2   0   10.90    4.30
 -15   2   0   24.40    4.10
 -15   2   0   37.40    5.20
 -15   2   0   25.20    4.30
 -15   2   0   17.40    5.20
  14  -2   0   44.20    6.40
 -14   2   0   35.00    4.70
 -14   2   0   21.40    5.50
 -14   2   0   33.30    5.00
 -14   2   0   25.20    4.20
  13  -2   0   46.50    8.00
 -13   2   0   51.99    7.20
 -13   2   0   51.99    5.60
 -13   2   0   51.79    5.60
 -13   2   0   55.19    6.20
 -13   2   0   60.39   10.50
 -13   2   0   57.99    6.10
  12  -2   0   30.80    5.30
 -12   2   0   26.10    4.40
 -12   2   0   25.30    3.90
 -12   2   0   27.20    7.80
 -12   2   0   25.60    3.50
 -12   2   0   28.50    5.50
 -12   2   0   30.20    4.30
  11  -2   0   12.30    4.30
 -11   2   0   14.80    2.90
 -11   2   0   15.50    3.30
 -11   2   0   11.30    3.40
 -11   2   0    9.40    4.10
 -11   2   0   21.60    7.50
 -11   2   0   16.30    3.00
  10  -2   0  174.58    9.80
 -10   2   0  176.08    9.40
 -10   2   0  176.18    8.60
 -10   2   0  164.28    8.60
 -10   2   0  176.98    9.10
 -10   2   0  167.18   12.80
 -10   2   0  173.28    8.80
  -9   2   0   19.70    3.20
  -9   2   0   21.80    3.30
  -9   2   0   28.30    5.70
  -9   2   0   18.70    2.70
  -9   2   0   28.50    3.70
  -8   2   0    5.90    3.40
  -8   2   0    7.00    2.90
  -8   2   0    9.10    4.30
  -7   2   0   22.80    4.60
  -7   2   0   23.30    3.30
  -7   2   0   25.40    4.60
  -6   2   0   94.29    6.50
  -6   2   0   93.09    6.90
  -5   2   0   23.50    4.40
  -5   2   0   30.70    4.10
  -4   2   0 1374.86   58.99
  -4   2   0 1370.46   59.09
  -3   2   0  449.86   19.40
  -3   2   0  412.66   19.20
  -2   2   0  138.89    7.10
  -2   2   0  148.09    7.00
   1  -2   0  641.64   26.40
  -1   2   0  581.84   26.40
   0  -2   0   49.60    2.90
   0   2   0   49.40    2.90
  -1  -2   0    2.80    1.40
   1   2   0    2.70    1.20
  -2  -2   0   16.00    1.60
  -2  -2   0   20.30    2.70
  -3  -2   0  591.04   26.90
  -3  -2   0  634.44   26.20
  -4  -2   0  530.85   23.30
  -4  -2   0  501.45   22.10
  -5  -2   0  279.67   13.50
  -5  -2   0  263.87   11.80
  -6  -2   0   13.30    3.80
  -6  -2   0   14.40    2.70
  -7  -2   0   78.79    5.50
  -7  -2   0   76.49    7.20
  -8  -2   0   44.20    6.60
  -8  -2   0   50.59    4.90
  -9  -2   0    9.30    5.30
  -9  -2   0    8.10    2.70
  -9  -2   0    9.60    2.70
  -9  -2   0   11.30    2.40
  -9  -2   0   13.70    2.70
  -9  -2   0    7.40    3.10
 -10  -2   0   10.70    2.90
 -10  -2   0   11.40    3.80
 -10  -2   0    9.50    2.50
 -10  -2   0   10.40    3.00
 -10  -2   0    8.40    5.50
 -10  -2   0   11.60    3.10
  10   2   0    9.30    4.30
 -11  -2   0    7.20    2.80
 -11  -2   0   11.80    3.20
 -11  -2   0    7.50    3.30
 -11  -2   0   14.80    4.40
 -11  -2   0    7.40    7.30
  11   2   0    7.00    4.40
 -12  -2   0   -0.60    4.20
 -12  -2   0    4.40    3.40
 -12  -2   0    2.10    4.50
 -12  -2   0    2.20    7.50
 -12  -2   0   -1.90    3.00
  12   2   0   -3.40    3.20
  12   2   0   -1.10    5.00
 -13  -2   0   21.30    3.90
 -13  -2   0   15.10    4.10
 -13  -2   0   12.60   11.70
 -13  -2   0   28.80    4.80
 -13  -2   0   19.60    5.20
  13   2   0   31.90    4.90
  13   2   0   25.60    6.40
 -14  -2   0   13.20    4.40
 -14  -2   0    8.20    4.70
 -14  -2   0    4.60    5.60
 -14  -2   0    9.10    4.30
  14   2   0    6.00    3.40
  14   2   0    7.90    6.80
 -15  -2   0   10.70    5.30
 -15  -2   0   21.30    4.20
 -15  -2   0   21.00    4.10
 -15  -2   0   18.50    4.80
  15   2   0   20.20    3.70
  15   2   0   19.70    7.30
 -16  -2   0   -0.80    3.20
 -16  -2   0    4.50    4.00
 -16  -2   0   -4.90    4.60
  16   2   0   -1.70    6.10
  16   2   0    0.60    3.00
  17  -3   0    3.20    3.40
 -17   3   0   -1.20    3.20
 -17   3   0    0.00    3.60
 -17   3   0   -1.60    3.80
  16  -3   0   19.90    4.30
 -16   3   0   24.20    4.00
 -16   3   0   21.00    4.50
 -16   3   0   18.90    5.00
 -15   3   0    4.10    5.20
 -15   3   0    8.70    4.50
 -15   3   0    2.50    4.00
 -14   3   0   -7.40    4.30
 -14   3   0    1.20    4.00
 -14   3   0   -4.90    4.80
 -14   3   0   -1.10    4.00
 -14   3   0    8.00    4.20
  13  -3   0   61.09    7.70
 -13   3   0   55.09    8.00
 -13   3   0   65.19   12.20
 -13   3   0   48.50    5.90
 -13   3   0   44.90    5.60
 -13   3   0   63.29    6.10
 -13   3   0   51.79    6.30
  12  -3   0   45.80    7.40
 -12   3   0   43.30    5.10
 -12   3   0   36.70    5.70
 -12   3   0   36.20    6.30
 -12   3   0   47.50    4.80
 -12   3   0   35.80    4.80
 -12   3   0   33.20    8.00
  11  -3   0   19.10    4.40
 -11   3   0    6.90    4.10
 -11   3   0   12.90    3.10
 -11   3   0    9.50    3.10
 -11   3   0   15.60    3.40
 -11   3   0   20.70    6.60
 -11   3   0   12.10    3.00
  10  -3   0   43.20    5.50
 -10   3   0   47.00    7.80
 -10   3   0   49.20    4.50
 -10   3   0   42.90    3.70
 -10   3   0   42.30    6.20
 -10   3   0   45.20    4.80
 -10   3   0   40.00    4.50
  -9   3   0   17.60    5.00
  -9   3   0   28.80    3.70
  -9   3   0   34.20    4.20
  -9   3   0   33.80    6.90
  -9   3   0   33.30    4.90
  -9   3   0   31.10    3.80
  -8   3   0   48.90    6.80
  -8   3   0   46.70    5.90
  -8   3   0   49.30    4.50
  -7   3   0   13.70    4.00
  -7   3   0    6.20    4.20
  -6   3   0   64.99    6.00
  -6   3   0   62.99    6.30
  -5   3   0    4.30    3.30
  -5   3   0    5.00    3.30
  -4   3   0  740.23   32.60
  -4   3   0  737.53   32.60
  -3   3   0  664.13   29.80
  -3   3   0  695.23   30.00
   2  -3   0  961.80   41.80
  -2   3   0  976.30   41.90
   1  -3   0  140.89    7.10
  -1   3   0  134.99    7.10
   0  -3   0  513.95   22.80
   0   3   0  533.65   22.90
  -1  -3   0   10.10    2.20
   1   3   0    8.30    1.80
  -2  -3   0    0.70    2.20
   2   3   0    4.70    1.60
  -3  -3   0  881.41   37.00
  -3  -3   0  819.02   36.20
  -4  -3   0   25.80    4.50
  -4  -3   0   21.30    2.00
  -5  -3   0  289.37   14.60
  -6  -3   0  130.89    9.00
  -6  -3   0  127.19    7.10
  -7  -3   0  267.77   14.30
  -7  -3   0  261.67   12.60
  -8  -3   0   48.80    6.90
  -8  -3   0   44.60    4.10
  -8  -3   0   50.69    4.00
  -8  -3   0   51.79    3.90
  -8  -3   0   41.80    4.70
  -9  -3   0   70.99    4.90
  -9  -3   0   72.09    8.30
  -9  -3   0   84.19    6.00
  -9  -3   0   76.19    4.90
  -9  -3   0   74.89    5.30
  -9  -3   0   73.09    4.90
   9   3   0   65.09    4.90
   9   3   0   83.29    6.40
 -10  -3   0    2.60    3.00
 -10  -3   0   -0.30    2.80
 -10  -3   0    6.80    5.60
 -10  -3   0    2.90    2.80
 -10  -3   0    1.90    3.60
 -10  -3   0    0.40    2.30
  10   3   0    4.90    4.50
 -11  -3   0    4.80    7.40
 -11  -3   0    0.90    2.80
 -11  -3   0    2.40    3.00
 -11  -3   0    5.60    4.10
 -11  -3   0    3.00    3.50
  11   3   0    4.10    5.00
 -12  -3   0    5.10    3.40
 -12  -3   0   -0.10    3.10
 -12  -3   0    6.50    4.50
 -12  -3   0   17.20    7.80
 -12  -3   0    0.90    3.80
  12   3   0    3.00    3.60
  12   3   0    4.20    5.10
 -13  -3   0   -0.20    5.40
 -13  -3   0   10.80    4.30
 -13  -3   0   -3.90    3.70
 -13  -3   0    6.20    3.90
  13   3   0   12.30    5.90
  13   3   0    1.30    3.90
 -14  -3   0   -3.60    3.60
 -14  -3   0    2.60    4.10
 -14  -3   0    0.90    5.50
 -14  -3   0   -7.50    4.20
  14   3   0   -2.80    6.60
  14   3   0   -2.00    3.60
 -15  -3   0    3.00    4.30
 -15  -3   0    5.10    3.50
 -15  -3   0    2.40    5.20
 -15  -3   0    1.90    3.90
  15   3   0    1.70    6.90
  15   3   0    3.30    3.40
 -16  -3   0    0.90    4.40
 -16  -3   0   -0.80    3.80
 -16  -3   0    1.30    2.90
  16   3   0   -0.40    4.00
  16   3   0   -0.50    3.00
  16   3   0    4.50    6.00
  17  -4   0    7.60    3.20
 -17   4   0    5.20    3.30
 -17   4   0    7.60    4.10
 -17   4   0    7.60    4.00
  16  -4   0   11.00    4.00
 -16   4   0   11.80    3.90
 -16   4   0    4.00    4.00
 -16   4   0    7.70    4.70
 -15   4   0   63.99    6.50
 -15   4   0   64.69    8.00
 -15   4   0   59.99    6.00
 -14   4   0   75.59    7.60
 -14   4   0   75.79    6.60
 -14   4   0   83.19    6.60
 -14   4   0   81.49    7.10
 -14   4   0   72.29    6.60
 -13   4   0    8.10    4.80
 -13   4   0    1.20    3.70
 -13   4   0    9.60    4.10
 -13   4   0    0.80    3.40
 -13   4   0    0.10    4.20
 -12   4   0   -1.70    3.30
 -12   4   0    6.30    7.20
 -12   4   0    0.20    2.90
 -12   4   0   -0.30    4.30
 -12   4   0    1.20    3.10
 -12   4   0   -7.90    3.60
 -11   4   0    1.80    2.60
 -11   4   0    2.50    3.90
 -11   4   0    7.60    3.40
 -11   4   0    7.50    2.70
 -11   4   0    7.70    3.10
 -11   4   0    7.10    6.90
 -10   4   0   67.99    8.50
 -10   4   0   70.89    5.10
 -10   4   0   68.99    4.70
 -10   4   0   63.29    6.10
 -10   4   0   62.89    4.70
 -10   4   0   61.49    5.60
  -9   4   0    2.10    2.40
  -9   4   0   -0.60    3.30
  -9   4   0    0.70    4.20
  -9   4   0    2.30    2.50
  -9   4   0    3.70    2.50
  -9   4   0    4.20    4.70
  -8   4   0   20.70    4.90
  -8   4   0   18.30    4.70
  -7   4   0  102.89    8.20
  -7   4   0  111.49    8.20
  -6   4   0  171.78   10.10
  -6   4   0  160.88    9.80
  -5   4   0   20.70    3.80
  -5   4   0   14.50    3.60
  -4   4   0  394.46   18.40
   3  -4   0  176.58    9.10
  -3   4   0  157.08    9.00
   2  -4   0   62.89    5.30
  -2   4   0   52.49    5.00
   1  -4   0  337.27   16.30
  -1   4   0  380.46   16.50
   0  -4   0 1237.78   54.99
   0   4   0 1326.37   55.09
  -1  -4   0  386.56   17.80
   1   4   0  403.46   17.70
  -2  -4   0   74.19    5.10
   2   4   0   77.49    4.60
  -3  -4   0   -0.10    1.40
  -3  -4   0    2.90    2.80
  -4  -4   0  125.69    6.00
  -4  -4   0  125.39    7.80
  -5  -4   0  223.08   11.80
  -5  -4   0  225.08   10.60
  -6  -4   0  536.65   25.20
  -7  -4   0  164.38   11.10
  -8  -4   0  118.69    6.40
  -8  -4   0  120.69    7.10
  -8  -4   0  120.49    6.50
  -8  -4   0  129.49    6.40
  -8  -4   0  108.39    6.30
  -8  -4   0  120.79    9.40
   8   4   0  116.29    6.20
   8   4   0  106.09    7.30
  -9  -4   0    9.30    5.40
  -9  -4   0   -1.30    3.30
  -9  -4   0    1.40    2.30
  -9  -4   0    7.30    2.90
  -9  -4   0    7.90    2.70
  -9  -4   0    5.70    2.80
   9   4   0    5.90    2.60
   9   4   0    4.80    3.70
 -10  -4   0   10.60    5.90
 -10  -4   0   12.90    3.10
 -10  -4   0   12.40    3.00
 -10  -4   0   17.40    4.20
 -10  -4   0   21.90    3.40
  10   4   0   19.10    3.20
  10   4   0   16.80    4.40
 -11  -4   0    1.80    3.30
 -11  -4   0    0.40    4.60
 -11  -4   0    0.50    3.40
 -11  -4   0    1.00    2.80
 -11  -4   0   11.00    6.50
  11   4   0   -3.30    3.20
  11   4   0    3.20    5.30
 -12  -4   0   41.50    5.40
 -12  -4   0   32.70    5.30
 -12  -4   0   26.50    7.70
 -12  -4   0   45.90    5.60
 -12  -4   0   44.90    7.30
  12   4   0   38.40    4.60
  12   4   0   52.49    8.70
 -13  -4   0    2.80    5.00
 -13  -4   0    6.80    4.20
 -13  -4   0   -1.40    3.50
 -13  -4   0    2.00    4.30
  13   4   0   -0.80    3.90
  13   4   0   -0.10    6.10
 -14  -4   0   -0.40    3.70
 -14  -4   0   -0.10    4.10
 -14  -4   0    2.70    5.30
 -14  -4   0   -4.90    4.50
  14   4   0   -9.60    6.70
  14   4   0   -1.10    3.60
 -15  -4   0    3.60    3.30
 -15  -4   0   -1.00    4.90
 -15  -4   0    8.80    4.50
  15   4   0    1.30    3.30
  15   4   0    5.10    6.70
 -16  -4   0    2.60    3.60
 -16  -4   0   -0.60    3.90
 -16  -4   0   -0.70    2.70
  16   4   0    0.50    3.00
  16   4   0    3.20    3.80
 -17   5   0    0.00    3.70
 -17   5   0   -2.10    3.10
 -17   5   0   -1.40    3.80
 -16   5   0    0.10    4.30
 -16   5   0    9.90    3.80
 -16   5   0   -3.90    4.00
  15  -5   0   37.20    5.40
 -15   5   0   36.20    5.20
 -15   5   0   39.80    7.20
 -15   5   0   57.09    5.60
 -15   5   0   51.59    6.20
 -14   5   0   16.70    4.10
 -14   5   0   28.60    4.80
 -14   5   0   18.80    4.30
 -14   5   0   21.80    5.80
  13  -5   0  153.78   17.00
 -13   5   0  168.48    9.80
 -13   5   0  150.58    8.80
 -13   5   0  162.98    9.20
 -13   5   0  180.98    8.90
 -13   5   0  153.48   10.70
  12  -5   0  163.08   16.20
 -12   5   0  166.08    9.10
 -12   5   0  149.19    9.40
 -12   5   0  151.78    9.00
 -12   5   0  131.19    8.20
 -12   5   0  160.58    8.60
 -11   5   0   53.39    5.00
 -11   5   0   55.69    5.80
 -11   5   0   55.79    5.00
 -11   5   0   46.40    4.80
 -11   5   0   55.19    6.80
 -10   5   0   36.50    6.00
 -10   5   0   33.60    4.70
 -10   5   0   31.10    3.80
 -10   5   0   30.00    4.40
 -10   5   0   32.90    3.80
  -9   5   0  127.39    7.10
  -9   5   0  138.29    7.80
  -9   5   0  129.69   10.00
  -9   5   0  128.39    6.80
  -9   5   0  136.39    7.10
  -9   5   0  132.99   10.30
  -8   5   0   32.10    3.60
  -8   5   0   29.80    5.60
  -8   5   0   26.90    5.30
  -8   5   0   36.10    4.40
  -7   5   0  144.09    9.80
  -6   5   0   12.90    4.10
   5  -5   0   10.20    4.00
  -5   5   0   11.30    3.90
   4  -5   0    5.20    3.40
  -4   5   0    1.90    3.30
   3  -5   0   16.30    3.50
  -3   5   0   12.00    3.90
   2  -5   0  185.18    9.70
  -2   5   0  181.88    9.90
   1  -5   0   92.69    6.40
  -1   5   0   85.89    6.00
   0  -5   0   22.80    3.50
   0   5   0   24.10    4.10
  -1  -5   0   19.20    3.10
   1   5   0   20.30    3.70
  -2  -5   0  561.94   25.40
   2   5   0  569.94   24.90
  -3  -5   0   67.79    5.40
  -3  -5   0   63.39    4.10
  -4  -5   0  731.73   33.30
  -4  -5   0  818.82   34.50
  -5  -5   0    9.60    3.90
  -6  -5   0   48.40    7.00
   6   5   0   41.70    4.40
  -7  -5   0  141.49    7.60
  -7  -5   0  145.89    7.00
  -7  -5   0  124.09   10.20
  -7  -5   0  131.19    7.00
   7   5   0  139.49    8.10
  -8  -5   0   19.30    2.80
  -8  -5   0   12.50    3.30
  -8  -5   0   18.60    2.50
  -8  -5   0   16.20    5.60
  -8  -5   0   18.50    2.90
  -8  -5   0   21.50    2.90
   8   5   0   19.80    2.90
   8   5   0   16.40    3.50
  -9  -5   0  104.79    5.90
  -9  -5   0  100.69    6.30
  -9  -5   0  103.29    5.90
  -9  -5   0  106.69    7.10
  -9  -5   0   95.99   10.60
   9   5   0  104.39    7.60
   9   5   0   96.89    6.20
 -10  -5   0   18.20    4.10
 -10  -5   0   23.10    3.40
 -10  -5   0   14.30    6.40
 -10  -5   0   13.00    3.60
 -10  -5   0   20.30    3.40
  10   5   0   20.20    3.40
  10   5   0   17.10    3.70
  10   5   0   15.30    4.70
 -11  -5   0   14.90    6.60
 -11  -5   0    0.00    3.90
 -11  -5   0   -1.00    2.80
 -11  -5   0    2.00    3.00
 -11  -5   0   -3.80    4.50
  11   5   0    1.50    3.20
  11   5   0    0.50    5.40
  11   5   0    2.60    3.40
 -12  -5   0   41.90    5.50
 -12  -5   0   45.80    6.70
 -12  -5   0   14.60    8.50
 -12  -5   0   51.39    6.20
 -12  -5   0   48.30    6.10
  12   5   0   58.59    8.50
  12   5   0   43.50    5.50
 -13  -5   0   16.70    3.90
 -13  -5   0   18.00    4.40
 -13  -5   0   22.70    4.50
 -13  -5   0   12.90    5.40
  13   5   0   19.30    4.50
  13   5   0   22.90    6.00
 -14  -5   0   11.10    4.30
 -14  -5   0    5.70    3.50
 -14  -5   0    6.70    4.90
 -14  -5   0   11.70    4.10
  14   5   0    7.80    3.90
  14   5   0   -0.10    6.40
 -15  -5   0   -2.50    3.00
 -15  -5   0   -0.10    4.70
 -15  -5   0    0.90    4.30
  15   5   0    5.40    6.50
  15   5   0   -0.60    3.40
 -16  -5   0   -0.80    3.70
 -16  -5   0    0.30    3.60
 -16  -5   0   -0.20    2.50
  16   5   0    1.30    3.50
  16   5   0    1.10    2.70
 -17   6   0    1.80    3.60
 -17   6   0    3.30    3.50
 -17   6   0    6.00    3.00
 -16   6   0   43.90    5.10
 -16   6   0   47.50    5.80
 -15   6   0   28.10    4.80
 -15   6   0   12.70    4.90
 -15   6   0   14.60    4.70
 -15   6   0   26.20    4.10
 -14   6   0    2.70    4.50
 -14   6   0    2.10    4.50
 -14   6   0    3.60    4.70
 -14   6   0   12.90    3.60
 -13   6   0   85.59    6.50
 -13   6   0   82.89    7.60
 -13   6   0   83.79    6.50
 -13   6   0   79.89    7.60
  12  -6   0    7.50    8.80
 -12   6   0    2.00    3.90
 -12   6   0    3.50    3.90
 -12   6   0    8.80    4.90
 -12   6   0    3.70    3.20
  11  -6   0   56.59   11.10
 -11   6   0   66.79    4.90
 -11   6   0   60.09    7.20
 -11   6   0   69.29    6.00
 -11   6   0   61.59    5.70
  10  -6   0   94.19   11.00
 -10   6   0   89.29    6.70
 -10   6   0   76.29    5.90
 -10   6   0   72.69    5.40
 -10   6   0   77.29    5.60
 -10   6   0   73.49    9.00
 -10   6   0   82.99    6.20
   9  -6   0   18.20    6.50
  -9   6   0   18.40    2.90
  -9   6   0   18.40    3.80
  -9   6   0   19.80    3.00
  -9   6   0   19.20    6.00
  -9   6   0   18.60    2.80
  -9   6   0   14.50    3.00
   8  -6   0   66.09    8.60
  -8   6   0   51.69    4.90
  -8   6   0   66.49    5.30
  -8   6   0   57.09    7.90
  -8   6   0   60.69    4.40
   7  -6   0    0.50    4.70
  -7   6   0    2.00    4.70
   6  -6   0    7.60    4.60
  -6   6   0   15.90    4.50
   5  -6   0  290.77   15.50
  -5   6   0  299.97   15.50
   4  -6   0   52.19    6.60
  -4   6   0   47.20    5.70
   3  -6   0   96.89    6.80
  -3   6   0   83.89    6.80
   2  -6   0  455.55   22.10
  -2   6   0  502.85   22.20
   1  -6   0   34.70    5.20
  -1   6   0   44.80    4.90
   0  -6   0  125.49    7.60
   0   6   0  124.09    7.40
  -1  -6   0    5.00    2.60
   1   6   0    5.50    2.90
  -2  -6   0   77.89    5.90
   2   6   0   64.19    5.10
  -3  -6   0   38.90    5.20
   4   6   0  490.45   21.60
  -5  -6   0   35.60    5.40
   5   6   0   31.10    4.20
  -6  -6   0   35.10    6.10
   6   6   0   33.00    4.00
  -7  -6   0    0.20    2.00
  -7  -6   0    2.80    2.40
  -7  -6   0   -2.10    2.70
  -7  -6   0   -3.90    4.00
   7   6   0    4.00    2.50
   7   6   0    0.30    2.80
  -8  -6   0  163.68   12.10
  -8  -6   0  162.18    8.60
  -8  -6   0  165.38    8.80
  -8  -6   0  187.28    8.50
  -8  -6   0  188.58    9.40
   8   6   0  158.28    8.60
   8   6   0  205.78   10.20
  -9  -6   0   40.80    4.50
  -9  -6   0   34.70    4.20
  -9  -6   0   44.10    5.50
  -9  -6   0   36.40    7.70
  -9  -6   0   40.60    4.50
   9   6   0   44.40    6.90
   9   6   0   38.10    4.10
   9   6   0   37.00    4.10
 -10  -6   0    5.50    3.10
 -10  -6   0    3.60    4.50
 -10  -6   0    3.60    6.10
 -10  -6   0    5.90    2.90
 -10  -6   0    2.70    3.50
  10   6   0    7.40    3.30
  10   6   0    5.00    5.00
  10   6   0    5.90    3.40
 -11  -6   0    4.90    4.30
 -11  -6   0   20.10    7.70
 -11  -6   0    2.80    3.20
 -11  -6   0    2.60    3.90
 -11  -6   0    0.00    3.10
  11   6   0    2.00    5.50
  11   6   0    0.50    3.30
  11   6   0    3.80    3.60
 -12  -6   0    3.60    5.30
 -12  -6   0    6.10    4.40
 -12  -6   0   10.60    3.50
 -12  -6   0    6.70    3.80
  12   6   0    6.70    4.20
  12   6   0   13.40    5.60
  12   6   0    8.30    4.30
 -13  -6   0   56.69    7.20
 -13  -6   0   42.10    5.30
 -13  -6   0   48.10    6.30
 -13  -6   0   33.30    4.70
  13   6   0   48.00    7.40
  13   6   0   43.60    5.50
 -14  -6   0    8.00    4.40
 -14  -6   0   -3.40    4.70
 -14  -6   0   -0.20    3.10
  14   6   0   -3.60    6.40
  14   6   0    5.00    3.70
 -15  -6   0   23.30    4.30
 -15  -6   0   18.80    4.60
  15   6   0   26.80    3.70
  15   6   0   43.80    7.60
  15   6   0   37.40    5.10
 -16   7   0    6.20    3.40
 -16   7   0    8.30    4.10
 -16   7   0    7.60    3.80
 -16   7   0    1.90    4.40
 -15   7   0   17.20    4.40
 -15   7   0   24.70    5.50
 -15   7   0   29.20    4.80
 -15   7   0   24.90    4.70
 -14   7   0   83.59    8.20
 -14   7   0   77.09    6.60
 -14   7   0   86.89    6.40
 -14   7   0   85.59    8.10
 -13   7   0    3.10    4.40
 -13   7   0   10.00    4.60
 -13   7   0    9.00    3.60
 -13   7   0    6.10    4.70
  12  -7   0   39.30   10.70
 -12   7   0   35.90    4.90
 -12   7   0   31.00    4.80
 -12   7   0   28.40    4.70
 -12   7   0   29.80    5.40
  11  -7   0    8.10    8.90
 -11   7   0    6.20    3.60
 -11   7   0    4.00    3.40
 -11   7   0    9.10    4.20
 -11   7   0    7.90    2.90
  10  -7   0    0.00    7.90
 -10   7   0    6.60    6.10
 -10   7   0    0.80    4.10
 -10   7   0   -1.50    2.60
 -10   7   0    3.20    3.00
 -10   7   0    0.20    3.20
 -10   7   0   -0.50    2.50
   9  -7   0   18.80    7.60
  -9   7   0   18.80    6.50
  -9   7   0   23.10    3.80
  -9   7   0   20.00    3.10
  -9   7   0   20.60    3.10
  -9   7   0   18.90    3.20
  -9   7   0   20.50    3.00
   8  -7   0   40.70    8.10
  -8   7   0   27.10    4.00
  -8   7   0   27.90    3.90
  -8   7   0   31.00    3.80
  -8   7   0   25.00    6.00
  -8   7   0   35.10    4.70
   7  -7   0   17.40    6.20
  -7   7   0   14.70    3.20
  -7   7   0   23.30    2.80
  -7   7   0   24.90    5.80
  -7   7   0   21.90    2.80
   6  -7   0    0.60    5.20
  -6   7   0    3.90    4.10
   5  -7   0  173.28   10.90
  -5   7   0  173.18   10.20
  -5   7   0  146.39    8.00
   4  -7   0   41.50    6.80
  -4   7   0   26.90    3.40
  -4   7   0   31.40    5.20
   3  -7   0    6.20    3.60
  -3   7   0    6.80    3.80
  -3   7   0    5.60    2.10
   2  -7   0    0.50    3.60
  -2   7   0    0.90    3.40
  -2   7   0    1.30    2.00
   1  -7   0   38.50    5.70
  -1   7   0   42.70    3.60
  -1   7   0   37.80    5.10
   0  -7   0   29.20    4.90
   0   7   0   27.10    3.40
   0   7   0   38.90    5.40
  -1  -7   0  113.59    7.40
   1   7   0   94.29    5.90
   1   7   0  122.39    7.40
  -2  -7   0    8.60    3.60
   2   7   0   16.60    2.40
   2   7   0   12.50    3.10
  -3  -7   0  228.88   11.90
   3   7   0  217.68   10.50
  -4  -7   0   62.79    6.90
   4   7   0   59.09    4.60
   4   7   0   62.69    4.60
  -5  -7   0  296.87   14.80
   5   7   0  268.47   13.00
  -6  -7   0   17.40    4.80
  -6  -7   0   29.80    4.20
  -6  -7   0   32.00    3.60
   6   7   0   29.20    3.50
   6   7   0   25.50    4.40
   6   7   0   25.90    3.20
  -7  -7   0   -0.70    2.80
  -7  -7   0    0.50    4.90
  -7  -7   0    1.80    2.20
  -7  -7   0    2.20    2.40
   7   7   0   -0.80    2.30
   7   7   0    3.10    3.00
   7   7   0    0.40    2.70
  -8  -7   0   30.20    7.20
  -8  -7   0   41.50    5.90
  -8  -7   0   35.00    3.70
  -8  -7   0   38.10    4.20
   8   7   0   40.00    4.50
   8   7   0   36.10    6.20
   8   7   0   34.40    3.80
  -9  -7   0   53.09    4.80
  -9  -7   0   59.09    6.70
  -9  -7   0   51.59    8.90
  -9  -7   0   55.19    5.00
   9   7   0   50.09    4.50
   9   7   0   46.20    5.10
   9   7   0   52.29    6.60
 -10  -7   0   34.10    4.70
 -10  -7   0   35.80    4.50
 -10  -7   0   32.00    8.50
 -10  -7   0   38.10    6.10
  10   7   0   38.40    5.10
  10   7   0   34.40    4.40
  10   7   0   41.80    6.10
 -11  -7   0    1.90    3.60
 -11  -7   0    5.00    4.40
 -11  -7   0   19.60    7.80
 -11  -7   0   -7.10    3.90
  11   7   0   -1.10    3.80
  11   7   0   -5.90    3.50
  11   7   0    2.70    5.10
 -12  -7   0   19.00    4.90
 -12  -7   0   17.60    5.60
 -12  -7   0   19.00    4.10
  12   7   0   20.10    4.50
  12   7   0   18.80    4.30
  12   7   0   18.20    6.70
 -13  -7   0    7.70    5.00
 -13  -7   0    6.70    4.10
  13   7   0   -5.80    6.00
  13   7   0    4.70    3.90
 -14  -7   0   -7.20    4.60
 -14  -7   0    0.30    4.40
  14   7   0    0.10    6.10
  14   7   0    2.00    3.70
  14   7   0   -9.70    3.80
 -15  -7   0    5.20    4.10
 -15  -7   0   -2.40    4.00
  15   7   0    5.40    2.90
  15   7   0    4.40    3.30
 -16   8   0    8.80    3.70
 -16   8   0   -2.30    3.60
 -16   8   0    7.90    4.60
 -15   8   0   15.20    3.50
 -15   8   0   14.40    4.20
 -15   8   0    7.40    4.60
 -15   8   0    9.50    4.50
 -14   8   0   -2.70    3.20
 -14   8   0    5.80    4.50
 -14   8   0    2.90    4.70
 -14   8   0    3.20    3.90
 -13   8   0   47.50    7.50
 -13   8   0   45.90    5.20
 -13   8   0   49.10    6.40
 -13   8   0   46.20    7.10
  12  -8   0    1.90   10.70
 -12   8   0    5.00    5.00
 -12   8   0    1.40    4.40
 -12   8   0   11.60    3.30
 -12   8   0    1.60    4.40
  11  -8   0   60.49   12.40
 -11   8   0   88.79    6.30
 -11   8   0   78.49    5.70
 -11   8   0   75.09    6.20
 -11   8   0   97.99    7.40
 -11   8   0   73.99    6.90
  10  -8   0  171.48   16.50
 -10   8   0  206.48    9.90
 -10   8   0  181.88   10.40
 -10   8   0  185.58    9.50
 -10   8   0  196.88   10.00
 -10   8   0  190.18    9.90
 -10   8   0  205.58   14.30
   9  -8   0   49.80    9.10
  -9   8   0   52.49    5.40
  -9   8   0   54.49    4.70
  -9   8   0   56.49    5.60
  -9   8   0   49.00    5.80
  -9   8   0   52.09    4.30
  -9   8   0   62.49    8.40
   8  -8   0  104.69   10.90
  -8   8   0  109.99    6.60
  -8   8   0  108.29    6.40
  -8   8   0  107.99    6.10
  -8   8   0  103.39    6.30
  -8   8   0  107.49    9.80
  -8   8   0  120.79    7.10
   7  -8   0   -1.70    6.10
  -7   8   0    4.30    2.50
  -7   8   0    4.50    5.20
  -7   8   0    6.70    2.50
  -7   8   0    3.70    3.10
  -7   8   0    3.00    3.00
   6  -8   0   86.39    8.80
  -6   8   0   81.79    8.00
  -6   8   0   66.89    4.80
  -6   8   0   80.19    5.10
  -6   8   0   72.99    5.50
  -6   8   0   75.09    5.20
   5  -8   0   47.20    7.80
  -5   8   0   30.50    3.90
  -5   8   0   34.90    6.30
   4  -8   0  278.57   15.60
  -4   8   0  286.87   13.10
  -4   8   0  274.97   15.40
   3  -8   0   70.59    7.30
  -3   8   0   59.59    6.70
  -3   8   0   66.99    4.70
   2  -8   0  430.36   21.10
  -2   8   0  452.95   20.90
  -2   8   0  410.66   19.20
   1  -8   0  782.52   35.20
  -1   8   0  735.13   33.80
  -1   8   0  826.02   35.30
   0  -8   0   83.59    7.10
   0   8   0   88.99    5.30
   0   8   0   84.39    6.80
  -1  -8   0  144.29    9.00
   1   8   0  163.78    9.40
   1   8   0  144.99    7.70
  -2  -8   0  707.13   33.00
   2   8   0  746.93   32.60
   2   8   0  732.43   31.70
  -3  -8   0   -0.20    3.50
   3   8   0    3.00    2.10
   3   8   0    1.30    2.20
  -4  -8   0  355.06   18.10
   4   8   0  317.37   16.10
   4   8   0  395.56   16.00
  -5  -8   0  140.09    8.10
  -5  -8   0  151.68    7.50
  -5  -8   0  151.18   10.30
   5   8   0  151.68    8.00
   5   8   0  146.59    7.60
   5   8   0  144.59    7.20
  -6  -8   0   39.00    4.70
  -6  -8   0   38.50    3.80
  -6  -8   0   39.20    7.30
   6   8   0   30.50    3.50
   6   8   0   35.80    3.70
   6   8   0   35.60    3.40
   6   8   0   36.10    4.90
  -7  -8   0   42.40    5.00
  -7  -8   0   24.10    6.20
  -7  -8   0   37.50    4.20
   7   8   0   41.70    5.90
   7   8   0   41.40    4.00
   7   8   0   42.10    4.10
  -8  -8   0   -2.00    5.40
  -8  -8   0    4.80    3.90
  -8  -8   0    6.20    2.90
  -8  -8   0    0.30    2.50
   8   8   0    3.70    2.70
   8   8   0    6.90    4.20
   8   8   0    1.10    2.80
  -9  -8   0   12.90    7.20
  -9  -8   0   25.30    3.40
  -9  -8   0   23.30    4.80
  -9  -8   0   21.00    3.70
   9   8   0   33.10    4.10
   9   8   0   30.80    4.30
   9   8   0   29.30    5.40
 -10  -8   0   -1.40    7.40
 -10  -8   0    7.90    3.20
 -10  -8   0    6.80    4.40
 -10  -8   0   16.20    4.00
  10   8   0    8.90    5.60
  10   8   0    9.20    3.90
  10   8   0   10.50    3.80
 -11  -8   0    8.50    4.60
 -11  -8   0   13.00    3.80
 -11  -8   0    2.20    4.50
  11   8   0    8.30    4.10
  11   8   0    4.90    3.90
  11   8   0    5.60    6.30
 -12  -8   0   11.50    4.20
 -12  -8   0   10.30    4.90
  12   8   0   -1.20    3.40
  12   8   0    7.90    6.50
  12   8   0    6.50    4.10
 -13  -8   0   43.40    5.80
  13   8   0   23.80    5.90
  13   8   0   26.30    4.20
  13   8   0   46.00    7.40
 -14  -8   0   16.80    4.40
 -14  -8   0   15.00    4.40
  14   8   0   11.40    3.40
  14   8   0   30.80    6.40
  14   8   0   19.00    3.90
 -16   9   0   33.60    5.80
 -16   9   0   31.30    4.90
 -16   9   0   38.00    5.30
 -15   9   0   10.50    5.00
 -15   9   0   11.10    4.20
 -15   9   0   11.50    4.30
 -14   9   0   87.59    7.00
 -14   9   0  103.29    8.00
 -14   9   0   95.69    8.40
 -14   9   0   89.19    6.30
 -13   9   0   41.10    5.10
 -13   9   0   41.30    7.40
 -13   9   0   42.70    6.00
 -13   9   0   51.99    6.90
 -12   9   0   -1.00    2.90
 -12   9   0   -0.10    4.10
 -12   9   0   16.30    5.40
 -12   9   0   -3.40    3.90
 -12   9   0    2.10    4.00
  11  -9   0  -16.40    8.70
 -11   9   0    4.80    3.80
 -11   9   0  -11.90    8.40
 -11   9   0    8.80    3.80
 -11   9   0    3.70    3.90
 -11   9   0    4.80    4.50
  10  -9   0   11.40    8.60
 -10   9   0   25.90    4.10
 -10   9   0   22.40    3.50
 -10   9   0   16.50    4.00
 -10   9   0   19.40    4.40
 -10   9   0   16.00    7.50
   9  -9   0  122.39   14.20
  -9   9   0  132.19    7.40
  -9   9   0  132.89    7.70
  -9   9   0  136.69    8.20
  -9   9   0  126.29    7.40
  -9   9   0  130.39   11.20
   8  -9   0  -10.30    6.60
  -8   9   0    9.00    6.70
  -8   9   0    7.20    3.30
  -8   9   0   -1.10    3.40
  -8   9   0    5.00    2.70
  -8   9   0   -1.00    2.30
  -8   9   0    5.30    3.10
   7  -9   0   22.00    7.10
  -7   9   0   26.70    3.80
  -7   9   0   27.20    6.50
  -7   9   0   28.80    4.80
  -7   9   0   23.90    3.30
  -7   9   0   28.30    3.50
  -7   9   0   25.80    3.10
   6  -9   0   33.80    7.10
  -6   9   0   41.50    4.60
  -6   9   0   27.20    3.80
  -6   9   0   27.90    6.10
  -6   9   0   23.90    3.40
  -6   9   0   27.10    3.80
  -6   9   0   28.00    4.00
   5  -9   0   41.30    7.40
  -5   9   0   29.20    3.60
  -5   9   0   31.70    3.60
  -5   9   0   32.20    3.40
  -5   9   0   24.40    3.40
  -5   9   0   37.80    6.10
  -5   9   0   23.60    3.70
  -5   9   0   23.60    4.20
   4  -9   0   24.10    6.10
  -4   9   0   21.80    5.20
  -4   9   0   25.40    3.90
   3  -9   0   92.89    9.00
  -3   9   0   87.49    8.40
  -3   9   0   84.09    5.60
   2  -9   0    1.20    4.00
  -2   9   0   -1.00    3.80
  -2   9   0    2.80    2.30
   1  -9   0   32.90    6.20
  -1   9   0   26.10    3.70
  -1   9   0   31.30    5.80
   0  -9   0    4.20    3.70
   0   9   0    2.40    3.80
   0   9   0    6.30    2.50
  -1  -9   0  125.79    9.00
   1   9   0  132.69    8.80
   1   9   0  127.59    7.10
  -2  -9   0   -4.30    3.50
   2   9   0   -0.40    3.20
   2   9   0   -0.70    2.10
  -3  -9   0    0.40    2.10
  -3  -9   0   -3.80    2.60
  -3  -9   0    3.00    3.50
   3   9   0    1.00    1.90
   3   9   0    5.10    2.00
   3   9   0    2.90    2.30
  -4  -9   0   36.40    3.50
  -4  -9   0   28.60    4.40
  -4  -9   0   32.70    5.60
   4   9   0   38.10    4.00
   4   9   0   33.40    4.10
   4   9   0   32.20    3.30
   4   9   0   36.80    3.50
   4   9   0   31.40    4.00
  -5  -9   0   24.50    3.70
  -5  -9   0   53.89    7.00
  -5  -9   0   28.00    4.20
   5   9   0   30.20    4.30
   5   9   0   27.10    3.30
   5   9   0   33.10    3.50
   5   9   0   41.30    5.00
   5   9   0   37.80    4.00
  -6  -9   0   23.00    5.90
  -6  -9   0   27.60    3.80
  -6  -9   0   16.10    3.50
   6   9   0   22.30    2.90
   6   9   0   31.40    3.70
   6   9   0   32.90    3.70
   6   9   0   29.70    4.10
  -7  -9   0    3.30    2.90
  -7  -9   0   -5.50    5.30
  -7  -9   0    0.00    3.20
   7   9   0    5.70    2.90
   7   9   0    1.90    2.40
   7   9   0    3.20    3.70
  -8  -9   0   83.39    5.90
  -8  -9   0   77.69    6.70
  -8  -9   0   62.99   10.80
   8   9   0   89.19    5.80
   8   9   0   81.39    5.60
   8   9   0   74.89    7.80
  -9  -9   0   44.10    6.30
  -9  -9   0   48.50    6.00
   9   9   0   55.09    5.80
   9   9   0   54.89    4.90
   9   9   0   53.49    8.40
 -10  -9   0    4.40    4.90
 -10  -9   0   12.00    4.40
  10   9   0    9.00    6.20
  10   9   0   15.70    4.10
  10   9   0   10.20    3.90
 -11  -9   0   25.20    5.40
 -11  -9   0   20.80    4.60
  11   9   0   35.50    7.10
  11   9   0   32.40    5.00
  11   9   0   32.60    5.50
 -12  -9   0   -1.30    4.30
 -12  -9   0    7.30    4.80
  12   9   0    1.10    3.70
  12   9   0    2.90    4.00
  12   9   0    0.20    3.90
  12   9   0    3.70    6.50
 -13  -9   0    6.60    4.40
 -13  -9   0   -4.90    4.20
  13   9   0    5.00    3.60
  13   9   0    9.10    6.10
  13   9   0   -1.60    3.40
  13   9   0   -2.90    5.00
 -14  -9   0   -1.10    3.70
 -14  -9   0    0.50    3.90
  14   9   0    0.50    3.00
 -16  10   0   -1.60    3.60
 -16  10   0    0.80    3.20
 -16  10   0    2.10    3.70
 -15  10   0   -3.60    3.90
 -15  10   0    4.60    4.40
 -15  10   0    3.10    3.90
 -14  10   0    9.70    5.20
 -14  10   0    6.00    4.80
 -14  10   0    8.40    4.50
 -13  10   0    1.60    5.20
 -13  10   0   -3.70    4.70
 -13  10   0   -2.70    4.40
 -12  10   0    4.10    4.60
 -12  10   0   11.80    4.40
 -12  10   0    9.60    4.30
 -12  10   0   11.20    5.60
  11 -10   0   31.00   10.20
 -11  10   0   10.80    4.60
 -11  10   0   14.20    4.20
 -11  10   0   17.80    4.50
 -11  10   0    8.80    5.00
  10 -10   0   83.59   13.60
 -10  10   0   55.59    5.90
 -10  10   0   48.90    5.40
 -10  10   0   34.20    9.10
 -10  10   0   52.69    7.40
 -10  10   0   54.79    5.30
   9 -10   0   13.30    8.40
  -9  10   0    6.70    3.40
  -9  10   0    5.80    4.20
  -9  10   0   14.40    3.20
  -9  10   0    6.00    3.30
  -9  10   0    6.80    3.10
  -9  10   0    6.90    6.90
   8 -10   0   -2.50    7.50
  -8  10   0    0.30    2.90
  -8  10   0    2.20    3.00
  -8  10   0    0.60    3.00
  -8  10   0   11.10    7.20
  -8  10   0   -4.20    3.30
  -8  10   0    6.10    3.60
   7 -10   0   76.89   11.40
  -7  10   0   79.79    5.20
  -7  10   0   82.89    6.40
  -7  10   0   82.79    5.50
  -7  10   0   84.79    5.70
  -7  10   0   72.29    6.30
  -7  10   0   99.69    9.60
   6 -10   0   18.60    7.20
  -6  10   0   14.70    2.90
  -6  10   0   22.60    3.90
  -6  10   0   19.10    2.60
  -6  10   0   20.20    3.10
  -6  10   0   27.00    6.50
  -6  10   0   19.10    3.10
   5 -10   0    4.30    5.60
  -5  10   0   -0.40    2.20
  -5  10   0    8.70    5.80
  -5  10   0    6.90    2.10
  -5  10   0    0.70    2.40
  -5  10   0    5.60    2.90
  -5  10   0    2.60    2.80
  -5  10   0    3.50    2.80
  -5  10   0    4.40    2.60
   4 -10   0   30.20    6.50
  -4  10   0   27.40    2.70
  -4  10   0   27.00    3.30
  -4  10   0   17.50    5.40
  -4  10   0   22.10    3.30
  -4  10   0   17.80    3.20
  -4  10   0   24.40    3.50
  -4  10   0   22.80    3.80
  -4  10   0   20.10    3.50
   3 -10   0   73.39    8.00
  -3  10   0   54.79    3.90
  -3  10   0   58.19    4.40
  -3  10   0   58.49    5.60
  -3  10   0   59.99    4.70
  -3  10   0   49.20    4.90
  -3  10   0   72.19    8.40
  -3  10   0   59.29    4.20
  -3  10   0   63.99    4.60
   2 -10   0   68.29    8.10
  -2  10   0   72.79    5.40
  -2  10   0   70.89    5.30
  -2  10   0   68.99    4.70
  -2  10   0   68.39    4.70
  -2  10   0   69.09    4.80
  -2  10   0   75.49    5.20
  -2  10   0   77.29    8.50
  -2  10   0   75.19    4.70
   1 -10   0   17.00    4.40
   1 -10   0   21.40    3.10
  -1  10   0   19.50    3.00
  -1  10   0   24.60    4.00
  -1  10   0   24.80    3.10
  -1  10   0   18.80    3.00
  -1  10   0   28.30    5.90
   0 -10   0   46.30    6.50
   0 -10   0   33.40    3.80
   0  10   0   44.10    6.80
   0  10   0   31.30    3.30
   0  10   0   29.60    4.20
   0  10   0   30.70    3.30
   0  10   0   33.20    4.20
  -1 -10   0   75.49    4.90
  -1 -10   0   94.59    8.10
   1  10   0   73.09    5.00
   1  10   0   85.19    6.10
   1  10   0   80.29    4.90
   1  10   0   86.79    7.40
   1  10   0   85.39    5.60
  -2 -10   0    2.20    3.10
  -2 -10   0    8.20    4.30
  -2 -10   0    3.50    2.20
   2  10   0    5.40    3.70
   2  10   0    6.20    2.30
   2  10   0    4.60    2.50
   2  10   0    1.70    2.00
  -3 -10   0  268.77   13.40
  -3 -10   0  283.07   15.70
  -3 -10   0  285.57   12.90
   3  10   0  302.07   12.90
   3  10   0  284.47   12.90
   3  10   0  271.17   13.50
  -4 -10   0   31.80    5.30
  -4 -10   0   22.10    3.50
  -4 -10   0   30.80    6.00
   4  10   0   25.30    3.60
   4  10   0   29.80    4.80
   4  10   0   35.90    3.40
   4  10   0   32.60    3.80
  -5 -10   0   10.20    4.90
  -5 -10   0    4.50    2.50
  -5 -10   0   -1.10    3.30
   5  10   0   -2.00    2.40
   5  10   0    2.60    2.30
   5  10   0    0.70    2.70
   5  10   0    0.70    2.60
  -6 -10   0   -3.20    3.70
  -6 -10   0    0.80    2.70
  -6 -10   0   -1.60    5.50
   6  10   0    7.70    2.70
   6  10   0    7.70    2.70
   6  10   0    6.50    3.70
   6  10   0    6.00    2.40
  -7 -10   0   10.40    3.20
  -7 -10   0    9.50    4.10
   7  10   0   10.20    2.80
   7  10   0    7.20    4.40
   7  10   0   12.70    3.40
  -8 -10   0    1.80    4.50
  -8 -10   0    0.40    3.30
   8  10   0    4.20    4.60
   8  10   0    4.00    3.00
   8  10   0    2.20    3.60
  -9 -10   0  107.69    8.80
  -9 -10   0  118.89    8.00
   9  10   0  119.39    7.70
   9  10   0  109.89    9.40
   9  10   0  110.49    6.70
 -10 -10   0    4.00    4.90
 -10 -10   0    7.20    4.40
  10  10   0    5.70    5.90
  10  10   0   10.60    4.20
  10  10   0   11.30    3.80
 -11 -10   0   -0.10    4.10
 -11 -10   0   -0.20    4.80
  11  10   0    7.40    6.10
  11  10   0    3.40    4.00
  11  10   0    3.50    3.70
 -12 -10   0   22.70    4.50
 -12 -10   0   21.60    4.90
  12  10   0   33.50    5.40
  12  10   0   25.40    6.20
  12  10   0   22.50    4.00
 -13 -10   0   -3.90    3.70
 -13 -10   0    1.80    3.80
  13  10   0   -4.80    3.30
  13  10   0    5.20    3.20
 -15  11   0   -4.50    3.90
 -15  11   0   -2.50    3.80
 -15  11   0   -0.90    3.70
 -14  11   0    0.80    4.60
 -14  11   0   -5.00    4.20
 -14  11   0   -4.10    4.30
 -13  11   0  -13.10    4.30
 -13  11   0   -1.10    4.50
 -13  11   0   -2.40    4.80
 -13  11   0    3.20    4.50
 -12  11   0    6.90    5.50
 -12  11   0    9.40    4.80
 -12  11   0    8.20    4.30
 -12  11   0    4.00    4.00
 -11  11   0  173.48   10.90
 -11  11   0  172.18    9.50
 -11  11   0  165.28    9.50
 -11  11   0  177.08   10.50
  10 -11   0   14.40    9.60
 -10  11   0   10.30    4.00
 -10  11   0   15.00    5.40
 -10  11   0   16.00    4.70
 -10  11   0   15.50    3.80
   9 -11   0   18.30    8.70
  -9  11   0   17.80    9.00
  -9  11   0   48.50    6.50
  -9  11   0   38.40    4.50
  -9  11   0   39.20    5.20
  -9  11   0   42.10    6.10
  -9  11   0   38.90    5.00
   8 -11   0   20.10    8.90
  -8  11   0   18.10    3.40
  -8  11   0    9.60    7.60
  -8  11   0   21.00    4.70
  -8  11   0   21.10    3.60
  -8  11   0   20.20    3.80
  -8  11   0   20.60    4.10
   7 -11   0   14.90    8.20
  -7  11   0   23.80    3.40
  -7  11   0   21.40    7.50
  -7  11   0   13.60    3.70
  -7  11   0   14.90    3.00
  -7  11   0   19.30    3.70
  -7  11   0   13.70    3.70
   6 -11   0    2.10    7.00
  -6  11   0    0.40    6.40
  -6  11   0    2.10    2.70
  -6  11   0    0.40    2.30
  -6  11   0    3.50    2.90
  -6  11   0    2.40    3.00
  -6  11   0    1.50    2.60
  -6  11   0   -0.20    3.30
   5 -11   0    0.50    6.10
  -5  11   0    5.00    2.40
  -5  11   0    0.00    2.00
  -5  11   0    0.10    2.40
  -5  11   0   -0.60    3.40
  -5  11   0   -3.30    5.80
  -5  11   0    1.50    2.90
  -5  11   0    0.80    3.20
  -5  11   0   -0.80    3.00
   4 -11   0   10.40    6.10
  -4  11   0    6.50    2.40
  -4  11   0   12.20    3.00
  -4  11   0    1.40    2.20
  -4  11   0   10.80    2.90
  -4  11   0    7.20    3.20
  -4  11   0    8.70    2.50
  -4  11   0   12.60    3.60
  -4  11   0    4.00    5.80
   3 -11   0   25.00    6.00
  -3  11   0   22.10    3.10
  -3  11   0   20.50    2.70
  -3  11   0   23.10    3.70
  -3  11   0   19.40    3.40
  -3  11   0   30.90    7.20
  -3  11   0   23.30    2.90
  -3  11   0   23.50    3.40
  -3  11   0   19.20    3.50
   2 -11   0    3.60    4.90
  -2  11   0    4.80    5.70
  -2  11   0    3.70    2.10
  -2  11   0    2.80    2.20
  -2  11   0    8.20    2.40
  -2  11   0    3.50    2.40
  -2  11   0    6.60    2.90
  -2  11   0    3.30    2.80
   1 -11   0   26.10    5.60
   1 -11   0   31.70    4.20
  -1  11   0   37.50    5.20
  -1  11   0   40.20    4.80
  -1  11   0   30.60    4.10
  -1  11   0   43.90    7.80
  -1  11   0   38.00    3.50
  -1  11   0   31.10    3.70
  -1  11   0   36.40    3.90
  -1  11   0   35.60    3.50
   0 -11   0    6.40    4.50
   0 -11   0    3.30    2.40
   0  11   0    0.70    2.20
   0  11   0   -2.90    2.20
   0  11   0   -0.40    2.20
   0  11   0   -1.90    2.30
   0  11   0    1.90    2.10
   0  11   0    2.10    2.70
   0  11   0    0.10    2.60
   0  11   0    2.60    4.60
  -1 -11   0   63.89    4.40
  -1 -11   0   55.79    8.00
   1  11   0   52.69    7.00
   1  11   0   56.99    4.00
   1  11   0   70.79    4.20
   1  11   0   47.60    4.50
   1  11   0   64.09    5.40
   1  11   0   53.79    4.70
  -2 -11   0    1.00    2.30
  -2 -11   0   -0.70    3.10
  -2 -11   0   -1.70    4.40
   2  11   0    1.90    1.80
   2  11   0   -0.60    2.30
   2  11   0   -7.30    2.40
   2  11   0    2.50    3.00
   2  11   0    0.90    2.20
  -3 -11   0  120.39   11.00
  -3 -11   0  140.09    7.50
  -3 -11   0  152.38    8.40
   3  11   0  149.39    7.40
   3  11   0  139.79    7.50
   3  11   0  159.08    8.80
  -4 -11   0   26.50    6.50
  -4 -11   0   29.20    5.00
  -4 -11   0   33.30    4.00
   4  11   0   34.80    4.80
   4  11   0   34.60    3.60
   4  11   0   35.60    4.00
  -5 -11   0   17.00    4.30
  -5 -11   0   19.30    3.10
   5  11   0   20.20    3.20
   5  11   0   21.90    3.00
   5  11   0   22.30    3.40
   5  11   0   18.30    3.90
  -6 -11   0   15.20    4.00
  -6 -11   0   15.20    3.30
   6  11   0   17.20    3.30
   6  11   0   18.00    3.10
   6  11   0   17.60    2.80
  -7 -11   0    6.10    4.00
  -7 -11   0    5.50    3.40
   7  11   0    5.70    2.90
   7  11   0    8.80    3.80
   7  11   0   18.10    3.40
  -8 -11   0   49.10    6.50
  -8 -11   0   54.89    5.60
   8  11   0   53.89    7.40
   8  11   0   53.09    5.20
   8  11   0   70.29    6.20
  -9 -11   0    7.00    4.40
  -9 -11   0    8.00    3.90
   9  11   0    8.00    3.80
   9  11   0   14.00    5.30
   9  11   0    5.20    3.60
 -10 -11   0    0.90    4.40
 -10 -11   0    1.30    4.70
  10  11   0    7.10    3.60
  10  11   0    7.80    3.80
  10  11   0   11.80    5.90
 -11 -11   0    8.80    4.40
 -11 -11   0   -3.50    4.50
  11  11   0   -3.20    4.00
  11  11   0   -2.00    3.40
  11  11   0   -5.90    5.40
 -12 -11   0   17.00    4.20
 -12 -11   0   15.90    4.50
  12  11   0   23.10    3.90
  12  11   0   12.80    5.70
  12  11   0   15.80    3.30
 -13 -11   0    2.80    3.30
 -13 -11   0    2.60    3.50
  13  11   0    0.40    2.60
  13  11   0   -0.70    2.90
 -15  12   0    0.30    3.70
 -15  12   0    1.00    3.50
 -15  12   0    2.60    3.60
 -14  12   0    4.00    4.20
 -14  12   0    7.70    4.40
 -14  12   0    2.90    4.20
 -13  12   0   -2.20    4.40
 -13  12   0    7.40    4.60
 -13  12   0    5.10    4.60
 -13  12   0    1.00    4.40
 -12  12   0   21.30    5.50
 -12  12   0   22.70    4.80
 -12  12   0   15.20    4.80
 -12  12   0   20.90    4.60
 -11  12   0    0.40    5.20
 -11  12   0   -0.10    4.20
 -11  12   0    3.60    4.40
 -11  12   0    3.60    4.60
 -10  12   0   23.60    4.30
 -10  12   0   21.70    5.00
 -10  12   0   17.70    4.10
 -10  12   0   16.70    5.40
 -10  12   0   22.90    4.50
   9 -12   0    3.00    9.70
  -9  12   0   13.60    4.70
  -9  12   0   12.30    3.60
  -9  12   0   30.00    5.60
  -9  12   0   16.80    4.20
  -9  12   0   17.20    4.50
   8 -12   0   12.30    9.60
  -8  12   0   19.00    4.80
  -8  12   0   23.90    3.90
  -8  12   0   16.20    4.00
  -8  12   0   19.10    4.00
  -8  12   0   21.60    4.00
  -8  12   0    2.50    8.70
   7 -12   0    3.00    8.40
  -7  12   0    2.50    3.50
  -7  12   0   -2.70    7.30
  -7  12   0    1.80    3.50
  -7  12   0    5.90    4.80
  -7  12   0    3.20    3.00
  -7  12   0    0.50    3.00
   6 -12   0   11.80    8.10
  -6  12   0   13.30    3.00
  -6  12   0    6.90    4.00
  -6  12   0    8.60    3.40
  -6  12   0    0.00    7.10
  -6  12   0    8.60    3.10
  -6  12   0    9.40    2.40
  -6  12   0    5.20    3.90
   5 -12   0  -10.50    6.30
  -5  12   0    1.20    3.00
  -5  12   0    1.50    2.60
  -5  12   0   -0.30    2.50
  -5  12   0    2.60    3.40
  -5  12   0    3.20    6.80
  -5  12   0    1.60    3.60
  -5  12   0    1.40    2.40
  -5  12   0   -1.90    3.40
   4 -12   0    4.80    6.10
  -4  12   0    1.10    3.30
  -4  12   0    2.90    3.00
  -4  12   0    4.00    2.90
  -4  12   0    2.90    2.30
  -4  12   0   -1.80    6.20
  -4  12   0    3.80    2.60
  -4  12   0    4.50    2.50
  -4  12   0    0.00    3.30
   3 -12   0   -1.70    5.20
  -3  12   0    5.00    2.60
  -3  12   0    1.70    2.50
  -3  12   0    4.20    3.40
  -3  12   0    3.20    3.00
  -3  12   0    1.60    3.20
  -3  12   0    8.30    6.80
  -3  12   0    2.80    2.60
   2 -12   0   -3.00    3.00
   2 -12   0   -7.80    4.80
  -2  12   0   -1.80    2.40
  -2  12   0    2.50    2.20
  -2  12   0   -0.20    2.80
  -2  12   0    1.00    3.10
  -2  12   0   -1.00    5.90
  -2  12   0   -2.80    2.60
  -2  12   0    3.20    3.50
   1 -12   0  333.77   18.50
   1 -12   0  345.17   15.50
  -1  12   0  343.77   15.20
  -1  12   0  350.26   15.60
  -1  12   0  339.97   15.20
  -1  12   0  337.57   15.40
  -1  12   0  339.17   18.90
  -1  12   0  329.27   15.90
  -1  12   0  324.37   15.20
  -1  12   0  331.27   16.20
   0 -12   0   -0.10    5.00
   0 -12   0    5.60    2.50
   0  12   0    1.70    3.00
   0  12   0    1.60    2.50
   0  12   0    5.60    2.60
   0  12   0    1.30    2.30
   0  12   0    6.80    3.10
   0  12   0    2.60    2.40
   0  12   0    2.70    2.10
   0  12   0    4.00    4.90
  -1 -12   0    1.60    3.70
  -1 -12   0    8.00    2.70
  -1 -12   0   10.90    8.00
   1  12   0    9.50    2.40
   1  12   0   13.30    3.70
   1  12   0    7.60    2.50
   1  12   0    7.50    2.70
   1  12   0   12.90    2.80
  -2 -12   0   56.69    4.70
  -2 -12   0   39.50    5.50
   2  12   0   60.49    4.80
   2  12   0   52.89    4.20
   2  12   0   56.69    5.70
   2  12   0   36.90    4.90
   2  12   0   53.59    4.60
  -3 -12   0   27.50    3.80
  -3 -12   0   16.40    3.90
   3  12   0   21.40    3.30
   3  12   0   26.20    3.70
   3  12   0   15.40    3.60
  -4 -12   0   43.60    4.70
  -4 -12   0   46.60    5.90
   4  12   0   52.09    6.40
   4  12   0   42.50    4.50
   4  12   0   44.90    4.10
  -5 -12   0   86.79    7.70
  -5 -12   0   72.99    5.80
   5  12   0   80.09    5.20
   5  12   0   73.19    6.10
   5  12   0   82.99    7.80
  -6 -12   0   24.20    5.00
  -6 -12   0   18.30    3.60
   6  12   0   21.00    3.70
   6  12   0   23.10    3.40
   6  12   0   18.60    3.20
  -7 -12   0    5.10    4.80
  -7 -12   0    0.60    3.60
   7  12   0    2.10    3.30
   7  12   0   -1.60    3.10
   7  12   0   -0.60    3.80
  -8 -12   0    8.60    4.10
  -8 -12   0    6.60    4.90
   8  12   0   10.90    4.10
   8  12   0   12.10    3.40
  -9 -12   0   30.50    5.30
  -9 -12   0   37.40    5.90
   9  12   0   33.20    4.50
   9  12   0   23.80    4.10
 -10 -12   0    4.80    4.40
 -10 -12   0   -1.40    4.70
  10  12   0    0.80    3.80
  10  12   0    8.80    3.40
 -11 -12   0    1.60    4.20
 -11 -12   0   -3.50    3.80
  11  12   0    2.80    3.80
  11  12   0    0.70    3.00
 -12 -12   0   13.40    4.00
 -12 -12   0   15.70    3.60
  12  12   0   12.70    2.90
  12  12   0   19.60    3.50
 -14  13   0    0.70    3.90
 -14  13   0   -2.50    3.90
 -14  13   0   -3.80    4.00
 -13  13   0   12.20    4.70
 -13  13   0   17.70    4.30
 -13  13   0   14.30    4.80
 -13  13   0   10.80    4.50
 -12  13   0   -2.50    5.30
 -12  13   0    2.40    4.90
 -12  13   0   -4.30    4.30
 -12  13   0    6.10    4.50
 -11  13   0    0.60    4.70
 -11  13   0    7.00    4.70
 -11  13   0    9.20    5.60
 -11  13   0    8.60    4.60
 -10  13   0    4.20    5.60
 -10  13   0   19.60    4.80
 -10  13   0   13.50    5.00
 -10  13   0   16.60    4.50
 -10  13   0   16.40    3.80
  -9  13   0   45.80    8.10
  -9  13   0   34.70    5.80
  -9  13   0   41.60    5.50
  -9  13   0   46.40    5.70
  -9  13   0   29.80    4.90
   8 -13   0   -0.90   10.30
  -8  13   0   14.00    4.70
  -8  13   0   14.50    3.70
  -8  13   0   23.60    5.20
  -8  13   0   14.00    4.80
  -8  13   0   13.30    3.90
   7 -13   0   49.90   11.00
  -7  13   0   63.09    6.30
  -7  13   0   66.99    8.00
  -7  13   0   79.49    6.20
  -7  13   0   69.59    6.50
  -7  13   0   55.19    6.10
   6 -13   0   11.70    8.90
  -6  13   0   25.60    4.00
  -6  13   0   24.60    4.60
  -6  13   0   21.30    3.90
  -6  13   0   23.10    4.40
  -6  13   0   24.70    4.50
  -6  13   0   14.80    8.80
  -6  13   0   15.80    3.10
   5 -13   0    5.10    6.80
  -5  13   0    4.60    3.50
  -5  13   0   18.60    4.00
  -5  13   0   17.60    4.70
  -5  13   0   14.00    7.70
  -5  13   0   17.40    3.30
  -5  13   0   15.80    3.10
  -5  13   0   10.80    3.10
  -4  13   0    1.60    6.60
  -4  13   0    5.90    2.70
  -4  13   0    1.20    2.70
  -4  13   0    7.00    4.30
  -4  13   0   11.00    3.50
  -4  13   0    5.90    2.70
  -4  13   0    9.20    4.00
   3 -13   0   49.90    5.80
  -3  13   0   37.80    4.20
  -3  13   0   41.40    4.90
  -3  13   0   48.90    9.00
  -3  13   0   47.80    4.90
  -3  13   0   37.10    4.20
  -3  13   0   49.20    5.90
  -3  13   0   26.80    4.70
   2 -13   0   33.00    4.20
  -2  13   0   19.30    4.40
  -2  13   0   25.90    3.50
  -2  13   0   20.70    2.90
  -2  13   0   23.60    3.80
  -2  13   0   22.50    6.70
  -2  13   0   15.00    4.00
  -2  13   0   20.80    3.10
   1 -13   0   45.70    4.70
  -1  13   0   41.60    4.10
  -1  13   0   54.09    5.30
  -1  13   0   43.90    4.70
  -1  13   0   56.49    5.80
  -1  13   0   42.50    4.30
  -1  13   0   51.79    6.00
  -1  13   0   57.29    8.50
  -1  13   0   40.50    4.40
   0 -13   0    3.00    3.00
   0  13   0   -2.50    2.50
   0  13   0    3.70    2.30
   0  13   0    5.30    3.00
   0  13   0   -2.50    2.40
   0  13   0   -5.40    3.30
   0  13   0    7.30    5.60
   0  13   0   -3.90    2.60
  -1 -13   0    7.00    3.90
  -1 -13   0    1.50    2.80
   1  13   0   -0.20    3.10
   1  13   0    4.00    2.60
   1  13   0    8.00    3.10
   1  13   0    1.40    2.80
   1  13   0    6.10    3.60
  -2 -13   0    2.90    4.00
  -2 -13   0    9.20    3.00
   2  13   0    9.40    3.10
   2  13   0    8.10    4.10
   2  13   0    6.50    2.70
   2  13   0   -1.30    4.60
   2  13   0    8.10    2.90
  -3 -13   0   16.60    3.20
  -3 -13   0   17.70    4.30
   3  13   0   22.30    3.30
   3  13   0   13.50    3.10
   3  13   0   23.70    4.30
  -4 -13   0   40.40    6.30
  -4 -13   0   31.20    4.90
   4  13   0   39.40    4.30
   4  13   0   49.00    4.70
   4  13   0   44.50    7.10
  -5 -13   0   50.99    7.40
  -5 -13   0   41.90    5.80
   5  13   0   48.00    5.40
   5  13   0   47.40    4.60
  -6 -13   0    3.50    3.80
  -6 -13   0    3.00    4.80
   6  13   0    1.80    3.30
   6  13   0    2.90    3.40
  -7 -13   0    6.60    4.90
  -7 -13   0    3.50    3.70
   7  13   0   10.20    4.00
   7  13   0    1.40    3.40
   7  13   0   10.30    3.10
  -8 -13   0    6.30    4.00
  -8 -13   0   -4.80    4.60
   8  13   0    2.30    3.80
   8  13   0   -0.30    3.10
  -9 -13   0    1.70    4.50
  -9 -13   0    1.50    4.20
   9  13   0    5.20    3.20
   9  13   0    0.90    3.40
 -10 -13   0   -0.30    4.10
 -10 -13   0  -10.00    4.20
  10  13   0   -1.00    3.60
  10  13   0    3.60    2.90
 -11 -13   0    6.00    3.70
 -11 -13   0    6.20    3.70
  11  13   0    1.70    3.40
  11  13   0    4.90    2.70
 -13  14   0    1.90    4.20
 -13  14   0   13.30    4.10
 -13  14   0    7.10    4.20
 -13  14   0   14.10    4.20
 -12  14   0   -0.40    4.50
 -12  14   0    3.90    4.60
 -12  14   0   -5.20    4.30
 -12  14   0   -7.70    4.40
 -11  14   0   24.50    4.90
 -11  14   0   30.10    5.70
 -11  14   0   27.60    5.10
 -11  14   0   34.00    5.30
 -10  14   0    7.30    4.20
 -10  14   0    5.10    4.90
 -10  14   0    3.40    4.70
 -10  14   0    4.80    4.70
 -10  14   0    5.10    3.30
  -9  14   0    1.80    4.30
  -9  14   0    4.90    3.40
  -9  14   0    1.70    5.30
  -9  14   0    1.60    4.30
  -9  14   0    3.40    4.80
  -8  14   0   38.50    5.10
  -8  14   0   40.00    6.60
  -8  14   0   35.70    5.40
  -8  14   0   38.60    6.80
  -8  14   0   30.60    4.50
  -7  14   0   23.00    5.40
  -7  14   0   13.40    4.20
  -7  14   0   18.00    4.20
  -7  14   0    5.40    4.60
  -7  14   0    7.60    4.60
  -6  14   0   21.40    4.60
  -6  14   0   19.50    4.10
  -6  14   0   24.20    4.20
  -6  14   0   17.20    3.50
  -6  14   0   18.30    4.60
  -6  14   0   12.70    4.90
  -5  14   0  159.18    8.90
  -5  14   0  161.68    8.90
  -5  14   0  161.98    8.80
  -5  14   0  168.18    9.80
  -5  14   0  166.48   10.20
   4 -14   0    6.70    4.30
  -4  14   0    0.90    3.00
  -4  14   0    3.80    4.40
  -4  14   0    6.60    3.70
  -4  14   0    3.60    3.20
  -4  14   0    5.80    7.90
  -4  14   0    5.70    3.20
   3 -14   0   49.00    5.50
  -3  14   0   35.40    4.50
  -3  14   0   43.20    7.60
  -3  14   0   47.10    7.40
  -3  14   0   58.99    6.50
  -3  14   0   43.70    8.60
  -3  14   0   47.90    5.30
  -3  14   0   39.80    4.90
   2 -14   0   30.70    4.70
  -2  14   0   32.80    4.10
  -2  14   0   11.40    6.40
  -2  14   0   32.90    4.10
  -2  14   0   27.30    4.60
  -2  14   0   22.10    4.60
  -2  14   0   29.70    3.90
  -2  14   0   24.20    3.40
   1 -14   0    3.80    3.10
  -1  14   0    9.50    3.30
  -1  14   0   20.80    6.90
  -1  14   0    6.10    2.80
  -1  14   0    5.80    4.00
  -1  14   0   10.00    3.60
  -1  14   0    6.40    2.70
  -1  14   0    6.30    4.10
   0 -14   0    8.20    4.50
   0 -14   0   -0.60    3.10
   0  14   0    0.50    3.80
   0  14   0    5.00    3.00
   0  14   0    6.30    3.30
   0  14   0    9.70    3.20
   0  14   0   -3.60    3.60
  -1 -14   0   20.30    5.00
  -1 -14   0    7.30    3.70
   1  14   0    4.90    4.10
   1  14   0   13.80    4.30
   1  14   0   13.20    3.40
   1  14   0   14.90    3.20
   1  14   0   12.80    3.40
  -2 -14   0    9.80    3.20
  -2 -14   0    8.30    4.50
   2  14   0    2.60    3.30
   2  14   0    7.30    3.20
   2  14   0   11.80    5.00
   2  14   0    7.20    3.30
  -3 -14   0    4.60    4.80
  -3 -14   0    1.80    3.20
   3  14   0    7.30    3.40
   3  14   0    0.00    3.20
   3  14   0    4.90    4.90
  -4 -14   0   50.49    8.00
  -4 -14   0   62.29    6.20
   4  14   0   64.89    5.90
   4  14   0   66.69    5.20
  -5 -14   0   52.09    6.90
  -5 -14   0   67.19    5.70
   5  14   0   50.39    4.90
   5  14   0   63.29    5.40
  -6 -14   0   71.09    6.30
  -6 -14   0   57.59    6.80
   6  14   0   71.59    6.10
   6  14   0   65.59    5.50
  -7 -14   0    5.10    4.80
  -7 -14   0    4.60    4.00
   7  14   0   10.50    3.30
   7  14   0    5.30    3.60
  -8 -14   0   -2.00    4.10
  -8 -14   0    4.60    4.40
   8  14   0    3.50    3.60
  -9 -14   0    2.60    4.20
  -9 -14   0    6.80    3.90
   9  14   0    7.90    3.00
   9  14   0    9.50    3.70
 -10 -14   0   11.10    3.90
 -10 -14   0    8.20    3.90
  10  14   0   18.20    2.70
  10  14   0   24.00    3.70
 -13  15   0   -2.30    3.60
 -13  15   0   -0.20    3.80
 -12  15   0   -0.50    3.90
 -12  15   0    2.40    4.10
 -12  15   0   -5.60    4.10
 -12  15   0    2.40    4.00
 -11  15   0   -1.60    4.30
 -11  15   0   -2.00    4.50
 -11  15   0    7.20    4.30
 -11  15   0    3.20    4.40
 -10  15   0    6.00    4.40
 -10  15   0    7.90    4.60
 -10  15   0    7.90    3.40
 -10  15   0    7.90    4.50
 -10  15   0   -4.50    4.20
  -9  15   0    9.60    4.80
  -9  15   0   11.60    4.90
  -9  15   0    9.30    4.90
  -9  15   0    4.60    4.50
  -9  15   0    9.80    3.70
  -8  15   0    9.00    4.90
  -8  15   0   -1.50    4.30
  -8  15   0    7.00    4.50
  -8  15   0    6.30    3.70
  -8  15   0   -1.20    4.30
  -7  15   0   70.39    7.50
  -7  15   0   75.39    6.60
  -7  15   0   69.69    7.20
  -7  15   0   75.99    8.80
  -6  15   0    4.30    4.10
  -6  15   0    4.30    3.50
  -6  15   0    1.00    3.50
  -6  15   0   -4.40    4.10
  -6  15   0    5.10    5.60
   5 -15   0    6.20    4.70
  -5  15   0    2.60    3.90
  -5  15   0    1.80    3.60
  -5  15   0    3.40    5.00
  -5  15   0    8.90    4.40
  -5  15   0    3.90    3.60
   4 -15   0   25.80    4.80
  -4  15   0   18.80    4.10
  -4  15   0   20.80    4.20
  -4  15   0   21.60    4.40
  -4  15   0   19.20    4.10
  -4  15   0   18.30    5.10
   3 -15   0   -2.50    3.90
  -3  15   0    1.50    3.30
  -3  15   0   -0.30    4.00
  -3  15   0   -0.80    3.10
  -3  15   0   -4.30    4.50
  -3  15   0    7.00    3.80
   2 -15   0   67.89    5.70
  -2  15   0   69.29    8.30
  -2  15   0   67.29    6.70
  -2  15   0   63.39    5.40
  -2  15   0   45.60    5.70
  -2  15   0   65.09    5.80
   1 -15   0    5.70    4.90
   1 -15   0    1.20    3.40
  -1  15   0    6.30    4.00
  -1  15   0    9.10    3.60
  -1  15   0   10.30    4.30
  -1  15   0    7.30    3.30
  -1  15   0    8.60    3.60
   0 -15   0    7.70    4.70
   0 -15   0   -0.90    3.40
   0  15   0   -4.50    3.20
   0  15   0    2.50    3.40
   0  15   0    1.10    4.60
   0  15   0   -7.80    3.90
   0  15   0    4.50    4.40
  -1 -15   0   37.70    5.60
  -1 -15   0   35.20    5.50
   1  15   0   23.20    3.80
   1  15   0   34.40    4.80
   1  15   0   33.30    5.60
   1  15   0   37.10    4.90
   1  15   0   26.60    6.20
  -2 -15   0    4.80    3.60
  -2 -15   0   -5.70    5.00
   2  15   0    2.50    3.20
   2  15   0   -1.20    3.50
   2  15   0   -1.30    3.30
  -3 -15   0   12.60    4.80
  -3 -15   0   15.60    3.80
   3  15   0   25.80    4.10
   3  15   0   10.80    3.80
  -4 -15   0   26.00    5.50
  -4 -15   0   27.80    4.40
   4  15   0   22.10    4.10
   4  15   0   17.50    4.10
  -5 -15   0   52.29    5.30
  -5 -15   0   49.20    6.60
   5  15   0   40.80    5.80
   5  15   0   51.69    5.10
  -6 -15   0    1.00    4.70
  -6 -15   0    4.20    3.90
   6  15   0    4.90    3.10
   6  15   0    4.10    3.80
  -7 -15   0    4.70    4.00
  -7 -15   0    2.40    4.50
   7  15   0   -3.80    3.50
   7  15   0    0.40    3.00
  -8 -15   0    5.60    4.20
  -8 -15   0    1.20    3.50
   8  15   0    3.20    3.40
  -9 -15   0   -3.20    3.60
  -9 -15   0    1.60    3.80
   9  15   0    1.00    3.20
 -12  16   0    3.70    3.80
 -11  16   0    1.20    4.30
 -11  16   0    3.20    4.00
 -11  16   0    5.10    4.10
 -10  16   0   20.70    4.40
 -10  16   0   15.80    4.20
 -10  16   0   18.60    5.00
 -10  16   0   22.50    3.40
  -9  16   0    4.50    4.10
  -9  16   0    9.00    5.00
  -9  16   0    8.00    4.40
  -9  16   0    1.80    3.30
   8 -16   0    4.10    4.50
  -8  16   0    6.10    4.20
  -8  16   0   -0.90    3.50
  -8  16   0    9.80    5.00
  -8  16   0    5.40    4.00
   7 -16   0   50.59    6.60
  -7  16   0   51.99    6.40
  -7  16   0   68.99    8.20
  -7  16   0   43.50    5.20
  -7  16   0   43.40    7.20
   6 -16   0   18.40    4.50
  -6  16   0   17.20    4.10
  -6  16   0   15.00    3.80
  -6  16   0   14.70    5.70
  -6  16   0   13.40    4.00
  -6  16   0   14.10    4.60
   5 -16   0    3.20    4.30
  -5  16   0   -2.60    3.40
  -5  16   0    0.30    5.20
  -5  16   0    6.50    4.60
  -5  16   0   -0.10    3.90
  -5  16   0    2.80    3.60
   4 -16   0   30.80    5.20
  -4  16   0   37.70    4.50
  -4  16   0   33.30    4.90
  -4  16   0   45.80    8.10
  -4  16   0   19.80    4.70
  -4  16   0   27.40    4.30
   3 -16   0   11.10    4.00
  -3  16   0   11.00    3.80
  -3  16   0    8.00    5.40
  -3  16   0    9.00    3.60
  -3  16   0    3.30    3.70
  -3  16   0    8.30    4.40
   2 -16   0    9.70    4.10
  -2  16   0   15.70    3.90
  -2  16   0    7.70    3.80
  -2  16   0   16.90    3.70
  -2  16   0   20.20    5.00
   1 -16   0    9.20    4.10
   1 -16   0   19.30    5.10
  -1  16   0   16.80    4.30
  -1  16   0    8.60    3.90
  -1  16   0   20.90    5.00
   0 -16   0   26.30    4.20
   0 -16   0   36.70    6.60
   0  16   0   34.30    5.40
   0  16   0   27.80    5.50
   0  16   0   31.70    4.00
   0  16   0   23.80    4.10
  -1 -16   0   17.00    5.60
  -1 -16   0   24.00    3.80
   1  16   0   24.30    4.10
   1  16   0   24.00    4.00
   1  16   0   29.80    4.50
  -2 -16   0   24.10    5.10
  -2 -16   0   20.60    4.10
   2  16   0   28.30    4.10
   2  16   0   20.90    4.20
  -3 -16   0   12.20    4.00
  -3 -16   0   11.40    5.30
   3  16   0   18.10    3.80
   3  16   0    8.70    3.70
  -4 -16   0    7.40    3.70
  -4 -16   0    8.80    5.10
   4  16   0   15.90    3.90
   4  16   0   13.90    3.40
  -5 -16   0    8.80    3.80
  -5 -16   0   10.80    4.60
   5  16   0   20.50    3.70
   5  16   0   10.00    3.50
  -6 -16   0    2.20    3.60
  -6 -16   0    8.90    4.40
   6  16   0   14.50    3.60
   6  16   0    8.80    3.10
  -7 -16   0    7.90    4.00
  -7 -16   0    7.20    3.90
   7  16   0    4.20    3.30
  -8 -16   0   -5.20    3.30
  -8 -16   0    0.30    3.50
   8  16   0    2.00    3.10
  10 -17   0    0.20    3.30
 -10  17   0   -2.80    4.20
 -10  17   0    0.20    2.50
 -10  17   0    1.50    4.30
 -10  17   0    7.20    3.70
   9 -17   0    5.90    3.70
  -9  17   0    5.20    3.00
  -9  17   0    7.40    4.70
  -9  17   0    5.80    4.70
  -9  17   0    4.20    3.60
   8 -17   0   -3.80    3.90
  -8  17   0   -2.10    3.70
  -8  17   0    2.40    4.90
  -8  17   0    4.60    4.60
  -8  17   0    0.10    3.10
   7 -17   0    1.00    3.90
  -7  17   0    2.60    3.50
  -7  17   0    4.60    4.80
  -7  17   0   -3.40    4.90
  -7  17   0   -0.20    3.50
   6 -17   0    1.70    3.70
  -6  17   0    1.10    5.30
  -6  17   0   -0.70    4.00
  -6  17   0   -0.30    3.20
  -6  17   0   -4.00    4.60
  -6  17   0    2.20    3.30
   5 -17   0    4.10    4.00
  -5  17   0   10.80    4.70
  -5  17   0    9.40    3.70
  -5  17   0    5.00    3.90
  -5  17   0   10.90    5.40
  -5  17   0   11.60    3.60
   4 -17   0    2.70    3.70
  -4  17   0    6.70    4.70
  -4  17   0    9.10    4.10
  -4  17   0    5.50    3.50
  -4  17   0   -2.30    3.40
   3 -17   0   -0.50    3.50
   3 -17   0    2.30    4.90
  -3  17   0   -3.30    3.60
  -3  17   0   -1.10    3.50
  -3  17   0   -1.00    4.80
  -3  17   0   -0.80    3.90
   2 -17   0    1.80    4.70
   2 -17   0    0.40    3.80
  -2  17   0    2.70    3.70
  -2  17   0    4.00    5.00
  -2  17   0    5.20    3.60
  -2  17   0   10.10    4.00
   1 -17   0    3.10    5.20
   1 -17   0   -3.70    3.80
  -1  17   0   -7.80    5.00
  -1  17   0   -0.90    3.70
  -1  17   0   10.30    4.10
   0 -17   0    7.40    3.80
   0 -17   0    6.80    5.00
   0  17   0    6.10    4.10
   0  17   0    7.20    3.70
  -1 -17   0    0.70    3.50
  -1 -17   0    3.30    5.20
   1  17   0   -8.10    3.40
   1  17   0    7.10    3.50
   1  17   0    2.30    3.40
  -2 -17   0   -5.30    4.80
  -2 -17   0   -2.90    3.60
   2  17   0    0.20    3.50
   2  17   0    0.80    3.30
  -3 -17   0    4.00    4.70
  -3 -17   0    1.10    3.50
   3  17   0    5.20    3.60
   3  17   0    3.60    3.70
  -4 -17   0    6.50    3.50
  -4 -17   0    7.70    4.60
   4  17   0    9.70    3.50
   4  17   0    5.70    3.50
  -5 -17   0   -0.90    3.30
  -5 -17   0   -1.70    4.20
   5  17   0    2.80    3.30
   5  17   0    3.20    2.90
  -6 -17   0   22.30    4.30
  -6 -17   0   35.20    4.50
   6  17   0   18.50    3.20
   6  17   0   29.80    4.40
   9 -18   0    2.50    2.80
  -9  18   0    1.70    2.70
  -9  18   0    2.70    4.20
  -9  18   0    5.10    4.10
  -9  18   0    1.10    3.60
   8 -18   0    1.80    3.10
  -8  18   0    0.70    2.80
  -8  18   0    5.60    4.60
  -8  18   0    1.20    3.60
  -8  18   0    3.50    4.30
   7 -18   0    4.20    3.30
  -7  18   0    3.70    3.00
  -7  18   0    1.60    3.80
  -7  18   0    6.60    4.70
  -7  18   0    8.00    4.40
   6 -18   0    3.70    3.50
  -6  18   0   -0.60    4.60
  -6  18   0    6.80    5.20
  -6  18   0    1.40    3.90
  -6  18   0   -1.10    3.10
   5 -18   0    2.20    3.60
  -5  18   0    0.20    3.10
  -5  18   0   -6.10    3.20
  -5  18   0    4.20    4.60
  -5  18   0    3.70    4.00
   4 -18   0   -1.50    3.60
   4 -18   0   -2.50    4.80
  -4  18   0    2.80    3.20
  -4  18   0    2.40    4.80
  -4  18   0    8.60    3.70
  -4  18   0    0.60    4.00
   3 -18   0   -1.60    5.00
   3 -18   0   -4.20    3.50
  -3  18   0    3.90    4.00
  -3  18   0    1.80    3.60
  -3  18   0    4.90    3.40
  -3  18   0   -0.90    5.00
   2 -18   0   -4.00    5.00
   2 -18   0    0.20    3.60
  -2  18   0    4.10    3.40
  -2  18   0  -16.30    4.80
  -2  18   0    1.50    3.90
   1 -18   0    8.50    3.50
   1 -18   0    8.90    5.30
  -1  18   0   10.10    3.70
  -1  18   0    5.30    4.00
   0 -18   0   -4.90    4.60
   0 -18   0    1.80    3.20
   0  18   0    1.80    3.60
   0  18   0    6.70    3.60
  -1 -18   0    0.10    4.60
  -1 -18   0   -3.40    3.50
   1  18   0   -3.50    5.50
   1  18   0   -2.40    3.40
  -2 -18   0    1.70    4.60
  -2 -18   0   11.00    3.40
   2  18   0    2.60    3.30
   2  18   0    6.60    3.40
  -3 -18   0    3.30    3.10
  -3 -18   0   -7.50    4.00
   3  18   0   -2.00    3.10
   3  18   0    4.30    3.00
  -4 -18   0    1.50    3.00
  -4 -18   0   -5.00    3.80
   4  18   0   -0.10    3.00
   4  18   0    0.80    3.00
  -5 -18   0    8.70    3.80
  -5 -18   0    6.60    2.90
   5  18   0    9.50    2.90
   5  18   0   10.30    2.90
  -7  19   0    5.30    2.70
  -7  19   0    0.90    3.40
   6 -19   0    1.80    2.90
   6 -19   0   -3.30    4.00
  -6  19   0   -0.20    3.00
  -6  19   0   -4.40    3.70
  -6  19   0    0.70    4.20
   5 -19   0    5.20    4.20
   5 -19   0    4.60    3.10
  -5  19   0    6.00    3.80
  -5  19   0    9.30    4.40
  -5  19   0    4.30    2.70
  -5  19   0    5.40    3.20
   4 -19   0   -0.20    3.10
   4 -19   0    2.20    4.30
  -4  19   0   -2.60    3.30
  -4  19   0   -1.80    3.60
  -4  19   0   -6.00    4.50
  -4  19   0   -0.60    2.80
   3 -19   0   -2.00    4.70
   3 -19   0    2.60    3.10
  -3  19   0   -0.50    2.90
  -3  19   0   -2.10    3.40
  -3  19   0  -11.50    4.40
   2 -19   0   29.50    5.30
   2 -19   0   34.20    4.60
  -2  19   0   26.80    3.90
  -2  19   0   34.40    4.30
   1 -19   0   -3.00    4.40
   1 -19   0    4.80    3.00
  -1  19   0   -5.00    2.90
  -1  19   0    5.80    3.40
   0 -19   0   -1.00    4.20
   0 -19   0   -2.90    3.00
   0  19   0   -2.50    3.20
   0  19   0    1.70    2.90
  -1 -19   0   -1.30    4.30
  -1 -19   0    5.60    3.00
   1  19   0    2.20    3.20
  -2 -19   0    1.30    4.10
  -2 -19   0    4.00    2.70
   2  19   0    3.40    2.90
   2  19  -1    2.00    2.80
  -2 -19   1   -3.30    3.90
  -2 -19   1   -2.00    2.80
   1  19  -1   11.10    3.10
  -1 -19   1    5.80    4.30
  -1 -19   1   12.10    3.20
   0  19  -1   -0.90    3.00
   0  19  -1    4.40    3.20
   0 -19   1    0.60    3.30
   0 -19   1   -1.20    4.20
  -1  19  -1    7.90    3.20
  -1  19  -1    9.00    3.50
   1 -19   1    8.60    3.10
   1 -19   1    6.80    4.50
  -2  19  -1    0.40    3.10
  -2  19  -1    0.00    3.50
   2 -19   1    5.00    3.20
   2 -19   1   -3.80    4.50
  -3  19  -1   37.10    4.30
  -3  19  -1   33.30    4.80
   3 -19   1   36.20    5.00
   3 -19   1   43.60    6.60
  -4  19  -1    3.80    3.70
  -4  19  -1    9.80    3.70
  -4  19  -1    8.00    3.00
  -4  19  -1    5.00    5.10
   4 -19   1   12.90    4.50
   4 -19   1    7.80    3.50
  -5  19  -1   -8.60    3.50
  -5  19  -1   -3.10    2.60
  -5  19  -1    2.20    4.00
  -5  19  -1   -0.40    3.10
   5 -19   1   -4.00    4.30
   5 -19   1    5.20    3.40
  -6  19  -1    1.90    3.90
  -6  19  -1    1.90    3.00
  -6  19  -1    1.00    3.50
   6 -19   1    3.30    3.20
   6 -19   1    0.70    4.20
   5  18  -1    6.80    2.80
   5  18  -1    3.90    2.60
  -5 -18   1    5.20    3.60
  -5 -18   1    1.30    3.00
   4  18  -1    1.70    3.10
   4  18  -1    4.50    3.00
  -4 -18   1   -2.10    3.10
  -4 -18   1    6.10    4.00
   3  18  -1   15.20    3.50
   3  18  -1    5.30    3.00
  -3 -18   1   11.30    3.40
  -3 -18   1    7.80    4.20
   2  18  -1    2.60    3.20
  -2 -18   1    0.30    3.40
  -2 -18   1    3.00    4.60
   1  18  -1   29.40    4.10
   1  18  -1   34.80    4.60
  -1 -18   1   33.50    5.30
  -1 -18   1   34.80    5.40
   0  18  -1   22.10    4.10
   0  18  -1   17.40    4.00
   0 -18   1   11.20    4.90
   0 -18   1   14.20    3.60
  -1  18  -1   50.49    5.30
  -1  18  -1   43.10    5.20
   1 -18   1   46.40    5.70
   1 -18   1   42.60    7.50
  -2  18  -1    6.00    3.70
  -2  18  -1   15.00    3.90
   2 -18   1    9.20    4.90
   2 -18   1    7.70    3.80
  -3  18  -1    2.90    4.70
  -3  18  -1    1.60    3.90
  -3  18  -1    8.40    3.50
  -3  18  -1    6.80    4.00
   3 -18   1   13.70    4.90
   3 -18   1    0.80    3.60
  -4  18  -1   -5.80    4.60
  -4  18  -1    0.60    3.90
  -4  18  -1    4.30    3.20
  -4  18  -1    8.00    3.70
   4 -18   1    2.90    5.10
   4 -18   1   -0.50    3.80
  -5  18  -1    3.10    3.70
  -5  18  -1   -3.30    3.00
  -5  18  -1   -1.50    4.40
  -5  18  -1    5.20    3.60
   5 -18   1    5.10    3.60
  -6  18  -1    7.60    3.40
  -6  18  -1   10.00    5.10
  -6  18  -1    0.90    3.70
  -6  18  -1    9.80    4.40
   6 -18   1    4.60    3.50
  -7  18  -1   16.90    4.40
  -7  18  -1   20.50    5.20
  -7  18  -1   18.40    4.10
  -7  18  -1   15.80    3.40
   7 -18   1   12.90    3.60
  -8  18  -1    4.20    4.50
  -8  18  -1    5.00    2.90
  -8  18  -1    0.10    4.30
  -8  18  -1    1.00    3.50
   8 -18   1    3.60    3.30
  -9  18  -1    5.80    3.60
  -9  18  -1   -1.70    4.40
  -9  18  -1    8.90    4.20
  -9  18  -1    4.30    2.70
   9 -18   1    6.40    3.00
   6  17  -1    0.50    2.80
   6  17  -1    5.20    3.20
  -6 -17   1    4.30    3.70
  -6 -17   1    0.50    3.20
   5  17  -1    2.10    3.30
   5  17  -1    5.20    3.10
  -5 -17   1    3.90    3.40
  -5 -17   1    8.00    4.20
   4  17  -1   15.70    3.60
   4  17  -1    9.20    3.60
  -4 -17   1    8.30    3.70
  -4 -17   1   14.30    4.50
   3  17  -1   -1.60    3.40
   3  17  -1    8.60    3.50
  -3 -17   1    4.70    4.60
  -3 -17   1    0.10    3.60
   2  17  -1   10.90    3.60
   2  17  -1   18.90    4.10
  -2 -17   1   16.00    5.20
  -2 -17   1    4.60    3.70
   1  17  -1   -0.50    3.60
   1  17  -1    6.70    3.90
  -1 -17   1   -3.10    3.50
  -1 -17   1    8.90    5.30
   0  17  -1    5.30    3.60
   0  17  -1    3.50    3.80
   0 -17   1    1.80    5.50
   0 -17   1    5.30    4.00
  -1  17  -1   39.20    5.20
  -1  17  -1   36.10    4.70
   1 -17   1   31.40    4.90
   1 -17   1   42.10    6.60
  -2  17  -1    4.70    4.00
  -2  17  -1   -1.50    3.60
  -2  17  -1    0.20    4.80
  -2  17  -1    4.10    3.90
   2 -17   1   -2.60    4.10
   2 -17   1    5.80    5.30
  -3  17  -1   32.70    4.40
  -3  17  -1   37.90    4.80
  -3  17  -1   30.70    5.40
  -3  17  -1   36.30    5.60
   3 -17   1   37.80    5.80
  -4  17  -1   -1.60    3.70
  -4  17  -1    0.60    5.40
  -4  17  -1   -1.20    3.40
  -4  17  -1    3.90    4.00
  -4  17  -1    4.10    4.60
   4 -17   1   -0.60    4.00
  -5  17  -1   24.60    3.80
  -5  17  -1   30.60    5.10
  -5  17  -1   17.10    5.50
  -5  17  -1   20.20    4.20
  -5  17  -1   14.20    4.20
   5 -17   1   17.50    4.50
  -6  17  -1   14.80    3.90
  -6  17  -1   11.60    5.20
  -6  17  -1   11.10    4.00
  -6  17  -1   11.90    4.90
   6 -17   1   14.40    4.50
  -7  17  -1    5.70    4.10
  -7  17  -1    7.80    3.60
  -7  17  -1   10.40    5.10
  -7  17  -1    5.70    4.70
   7 -17   1    5.90    4.40
  -8  17  -1    9.00    3.80
  -8  17  -1   18.40    4.80
  -8  17  -1    9.30    5.00
  -8  17  -1   13.90    3.70
   8 -17   1   20.50    4.30
  -9  17  -1   10.20    3.90
  -9  17  -1    8.90    4.80
  -9  17  -1   -0.20    4.50
  -9  17  -1    6.20    3.20
   9 -17   1    4.30    3.80
 -10  17  -1    0.90    4.20
 -10  17  -1    3.40    2.70
 -10  17  -1   -1.10    4.30
 -10  17  -1    0.50    3.50
  10 -17   1   -1.10    3.70
   8  16  -1   -0.50    3.10
  -8 -16   1    5.00    3.40
  -8 -16   1    4.40    3.60
   7  16  -1    7.50    3.40
   7  16  -1    4.90    2.80
  -7 -16   1   13.60    3.80
  -7 -16   1    6.60    3.80
   6  16  -1   16.60    3.40
   6  16  -1    7.40    3.50
  -6 -16   1    5.20    4.30
  -6 -16   1   11.20    4.00
   5  16  -1    0.80    3.60
   5  16  -1    2.90    3.40
  -5 -16   1    0.30    4.40
  -5 -16   1    2.30    3.60
   4  16  -1   12.60    3.80
   4  16  -1   11.90    3.90
  -4 -16   1    9.20    5.10
  -4 -16   1   13.80    4.10
   3  16  -1   -2.90    3.40
   3  16  -1   -3.80    4.00
  -3 -16   1   -2.70    4.60
  -3 -16   1    3.20    4.10
   2  16  -1   15.70    4.10
   2  16  -1   20.00    3.80
  -2 -16   1   13.60    3.90
  -2 -16   1   19.70    5.50
   1  16  -1   -3.10    5.20
   1  16  -1   -6.90    4.10
   1  16  -1   -4.60    3.40
   1  16  -1   -4.00    3.70
  -1 -16   1    3.00    3.60
  -1 -16   1    0.30    5.50
   0  16  -1   -2.50    3.80
   0  16  -1    0.90    5.30
   0  16  -1    6.10    3.90
   0 -16   1    3.40    3.90
   0 -16   1   10.70    5.40
  -1  16  -1    8.40    5.00
  -1  16  -1   18.00    4.00
  -1  16  -1   14.90    5.00
  -1  16  -1   15.30    4.00
   1 -16   1   23.80    5.50
   1 -16   1   15.20    4.50
  -2  16  -1   20.90    3.90
  -2  16  -1   22.60    4.40
  -2  16  -1   20.70    4.90
  -2  16  -1   28.00    4.10
   2 -16   1   21.00    4.40
  -3  16  -1   61.59    7.70
  -3  16  -1   68.69    6.00
  -3  16  -1   67.09    5.80
  -3  16  -1   62.49    5.70
  -3  16  -1   75.59    7.70
   3 -16   1   68.89    6.80
  -4  16  -1   38.70    4.80
  -4  16  -1   38.10    5.90
  -4  16  -1   26.20    5.30
  -4  16  -1   25.10    5.40
  -4  16  -1   37.40    4.80
   4 -16   1   36.30    5.10
  -5  16  -1   10.30    4.80
  -5  16  -1    7.70    4.00
  -5  16  -1    5.10    3.50
  -5  16  -1    4.00    3.80
  -5  16  -1   18.00    5.10
   5 -16   1    2.10    4.60
  -6  16  -1    8.10    4.40
  -6  16  -1    1.80    4.80
  -6  16  -1   -3.00    5.00
  -6  16  -1    1.20    3.90
   6 -16   1   10.60    4.80
  -7  16  -1    7.90    5.00
  -7  16  -1    4.60    4.10
  -7  16  -1    2.70    4.40
  -7  16  -1    3.50    4.20
   7 -16   1    5.70    5.00
  -8  16  -1   21.40    5.80
  -8  16  -1   16.20    4.70
  -8  16  -1   15.30    4.60
  -8  16  -1    8.10    3.80
  -9  16  -1    6.00    4.30
  -9  16  -1    0.60    5.20
  -9  16  -1    7.70    4.40
  -9  16  -1   -0.30    3.40
 -10  16  -1    5.00    3.00
 -10  16  -1    5.70    4.30
 -10  16  -1    5.20    4.40
 -10  16  -1    1.10    4.80
 -11  16  -1    0.50    4.10
 -11  16  -1   -0.10    4.60
 -11  16  -1    0.50    4.10
   9  15  -1    6.30    3.50
  -9 -15   1    6.90    3.90
  -9 -15   1    6.10    3.80
   8  15  -1   -3.70    3.30
  -8 -15   1   -2.50    4.00
  -8 -15   1    2.30    4.00
   7  15  -1    6.00    3.10
   7  15  -1    1.20    3.50
  -7 -15   1   -1.90    3.60
  -7 -15   1    2.00    4.40
   6  15  -1   38.50    4.90
   6  15  -1   43.60    5.60
  -6 -15   1   55.89    6.10
  -6 -15   1   46.30    6.90
   5  15  -1    5.30    3.60
   5  15  -1    5.40    3.60
  -5 -15   1    2.80    3.80
  -5 -15   1    4.70    4.40
   4  15  -1   18.00    3.80
   4  15  -1   16.90    4.00
  -4 -15   1   11.30    4.10
  -4 -15   1   12.00    5.10
   3  15  -1    3.70    3.60
   3  15  -1   -4.00    3.60
   3  15  -1    2.70    5.60
  -3 -15   1    4.20    3.60
  -3 -15   1    2.90    5.10
   2  15  -1   17.30    5.60
   2  15  -1   14.60    3.60
   2  15  -1   13.60    3.80
   2  15  -1    9.30    3.60
  -2 -15   1   14.70    4.90
  -2 -15   1   20.90    4.10
   1  15  -1    3.00    3.40
   1  15  -1    2.80    3.30
   1  15  -1    2.00    3.50
   1  15  -1   -1.40    4.80
  -1 -15   1   -4.50    3.90
  -1 -15   1   -6.30    5.00
   0  15  -1    5.00    4.70
   0  15  -1    3.70    4.80
   0  15  -1    3.40    3.60
   0  15  -1    3.60    3.50
   0 -15   1    1.10    3.70
   0 -15   1   -2.00    5.00
  -1  15  -1    2.10    4.10
  -1  15  -1   -4.10    3.10
  -1  15  -1   -1.00    3.60
  -1  15  -1   -1.00    4.10
  -1  15  -1   -1.50    3.40
   1 -15   1    2.00    3.50
  -2  15  -1   21.80    4.00
  -2  15  -1   24.10    5.10
  -2  15  -1   17.50    3.50
  -2  15  -1   20.30    5.30
  -2  15  -1   11.10    3.60
  -2  15  -1   19.60    4.20
   2 -15   1   20.30    4.40
  -3  15  -1   34.50    4.70
  -3  15  -1   18.50    5.00
  -3  15  -1   38.70    4.60
  -3  15  -1   33.00    4.70
  -3  15  -1   34.80    5.60
  -3  15  -1   36.50    5.80
   3 -15   1   40.90    5.60
  -4  15  -1    7.30    4.60
  -4  15  -1   10.20    3.90
  -4  15  -1    6.50    4.90
  -4  15  -1    5.50    3.50
  -4  15  -1    9.80    3.90
   4 -15   1    8.40    4.70
  -5  15  -1   20.60    4.40
  -5  15  -1   18.60    4.30
  -5  15  -1   21.70    4.40
  -5  15  -1   14.70    5.70
  -5  15  -1   17.10    4.00
   5 -15   1   25.50    4.80
  -6  15  -1   36.10    5.40
  -6  15  -1   31.10    4.40
  -6  15  -1   31.40    5.10
  -6  15  -1   43.60    7.10
  -6  15  -1   35.40    4.80
  -7  15  -1    6.90    4.30
  -7  15  -1    1.90    3.80
  -7  15  -1    2.70    3.70
  -7  15  -1    4.30    5.00
  -8  15  -1   28.50    4.60
  -8  15  -1   32.10    5.30
  -8  15  -1   36.90    4.90
  -8  15  -1   37.30    5.90
  -8  15  -1   26.00    5.40
  -9  15  -1    8.50    4.80
  -9  15  -1    5.60    4.70
  -9  15  -1    7.00    3.90
  -9  15  -1    3.30    3.90
  -9  15  -1    6.40    4.70
 -10  15  -1   11.80    5.10
 -10  15  -1   22.30    5.20
 -10  15  -1    8.00    4.80
 -10  15  -1   18.00    4.90
 -10  15  -1   16.60    3.80
 -11  15  -1    7.70    4.30
 -11  15  -1    5.70    4.50
 -11  15  -1    4.70    4.80
 -11  15  -1    1.60    4.70
 -12  15  -1   -7.80    4.30
 -12  15  -1    2.00    4.00
 -12  15  -1   -0.10    4.30
 -12  15  -1    5.00    4.30
  10  14  -1    1.40    3.30
 -10 -14   1   -2.20    3.80
 -10 -14   1    3.60    3.80
   9  14  -1    3.80    3.40
  -9 -14   1    0.60    4.10
  -9 -14   1    0.40    4.00
   8  14  -1    2.50    3.80
  -8 -14   1    5.00    4.20
  -8 -14   1   -2.30    3.70
   7  14  -1   36.50    4.60
   7  14  -1   33.30    4.90
  -7 -14   1   29.00    5.20
  -7 -14   1   31.60    4.70
   6  14  -1   13.30    3.90
   6  14  -1   21.60    4.00
  -6 -14   1   15.20    4.60
  -6 -14   1   15.80    4.30
   5  14  -1   34.80    5.00
   5  14  -1   37.70    7.40
   5  14  -1   32.90    4.40
  -5 -14   1   34.50    5.20
  -5 -14   1   37.30    6.50
   4  14  -1   62.09    5.50
   4  14  -1   64.89    7.90
   4  14  -1   52.19    5.20
  -4 -14   1   57.79    6.30
  -4 -14   1   49.30    7.70
   3  14  -1   48.80    7.50
   3  14  -1   36.20    5.10
   3  14  -1   38.40    4.50
  -3 -14   1   36.20    5.60
  -3 -14   1   35.00    4.40
   2  14  -1    1.00    3.20
   2  14  -1    3.90    4.20
   2  14  -1    1.60    3.10
   2  14  -1    0.50    3.10
  -2 -14   1    2.80    3.30
  -2 -14   1   -6.10    4.20
   1  14  -1    8.50    3.00
   1  14  -1    6.20    3.20
   1  14  -1    1.70    4.30
   1  14  -1    8.30    3.20
  -1 -14   1    5.10    3.80
  -1 -14   1   14.30    4.40
   0  14  -1   15.80    3.20
   0  14  -1    8.90    4.40
   0  14  -1   13.10    3.80
   0  14  -1    7.90    3.30
   0  14  -1    8.00    2.80
   0 -14   1   19.60    5.00
   0 -14   1    8.30    3.40
  -1  14  -1   32.30    4.80
  -1  14  -1   33.80    4.90
  -1  14  -1   34.00    5.50
  -1  14  -1   26.30   10.30
  -1  14  -1   25.70    3.60
  -1  14  -1   44.60    7.00
  -1  14  -1   38.60    4.70
   1 -14   1   28.70    4.80
  -2  14  -1    2.60    4.00
  -2  14  -1   -2.60    4.50
  -2  14  -1   -4.70    3.40
  -2  14  -1   -1.60    3.10
  -2  14  -1    4.00    6.30
  -2  14  -1    0.10    2.90
  -2  14  -1    3.80    2.70
   2 -14   1    3.50    3.50
  -3  14  -1   38.40    5.60
  -3  14  -1   34.60    4.30
  -3  14  -1   40.30    4.40
  -3  14  -1   20.80    3.90
  -3  14  -1   18.10    7.90
  -3  14  -1   34.70    4.90
  -3  14  -1   33.40    5.00
   3 -14   1   27.10    4.80
  -4  14  -1   19.90    5.40
  -4  14  -1   24.20    3.80
  -4  14  -1   20.10    3.40
  -4  14  -1   16.00    3.40
  -4  14  -1   17.50    8.30
  -4  14  -1   27.00    4.20
  -4  14  -1   25.80    5.30
   4 -14   1   21.60    4.60
  -5  14  -1    7.30    3.80
  -5  14  -1    5.80    3.40
  -5  14  -1   10.40    3.40
  -5  14  -1   13.00    3.40
  -5  14  -1   11.50    5.30
  -6  14  -1   12.70    4.80
  -6  14  -1    2.30    4.40
  -6  14  -1    6.70    3.90
  -6  14  -1    7.60    3.80
  -6  14  -1   10.20    4.00
  -6  14  -1    5.20    4.50
  -7  14  -1    4.80    4.00
  -7  14  -1    9.20    4.90
  -7  14  -1    5.30    4.20
  -7  14  -1   -0.60    4.20
  -7  14  -1    3.90    4.00
  -8  14  -1    4.10    4.90
  -8  14  -1   -2.50    4.00
  -8  14  -1    2.50    3.90
  -8  14  -1    3.60    4.70
  -8  14  -1    9.00    4.80
  -9  14  -1   10.10    4.40
  -9  14  -1    3.00    5.00
  -9  14  -1    6.00    4.00
  -9  14  -1    7.40    4.40
  -9  14  -1    2.20    4.20
 -10  14  -1    3.70    5.20
 -10  14  -1   13.20    4.70
 -10  14  -1   12.80    5.00
 -10  14  -1   11.30    3.70
 -10  14  -1   17.80    4.80
 -11  14  -1   14.60    5.10
 -11  14  -1   23.50    5.10
 -11  14  -1   20.50    4.90
 -11  14  -1   18.50    4.80
 -12  14  -1    3.70    4.70
 -12  14  -1   10.20    4.90
 -12  14  -1    5.10    4.60
 -12  14  -1    7.10    4.50
 -13  14  -1    2.50    4.10
 -13  14  -1    9.00    4.20
 -13  14  -1    6.90    4.40
 -13  14  -1   -1.90    4.20
  11  13  -1    3.10    3.40
  11  13  -1   -0.70    2.70
 -11 -13   1    0.80    3.60
 -11 -13   1   -1.80    3.70
  10  13  -1    0.80    3.70
  10  13  -1    2.40    3.00
 -10 -13   1   -6.10    4.00
 -10 -13   1   -2.20    4.20
   9  13  -1    4.20    3.10
   9  13  -1    5.80    4.00
  -9 -13   1   11.30    4.20
  -9 -13   1    7.90    4.50
   8  13  -1    3.50    3.40
   8  13  -1    0.00    3.00
  -8 -13   1    3.70    4.30
  -8 -13   1    1.30    4.60
   7  13  -1    4.90    4.80
   7  13  -1    0.00    3.40
   7  13  -1   -6.20    3.40
  -7 -13   1   -4.60    4.70
  -7 -13   1    0.60    3.70
   6  13  -1    1.70    3.70
   6  13  -1    1.70    3.40
  -6 -13   1    4.70    4.80
  -6 -13   1    1.40    3.60
   5  13  -1   36.80    5.00
   5  13  -1   30.00    4.60
   5  13  -1   15.20    3.70
  -5 -13   1   20.70    4.10
  -5 -13   1   27.90    5.30
   4  13  -1  202.78   10.40
   4  13  -1  197.28   10.20
   4  13  -1  203.68   11.70
  -4 -13   1  200.98   10.70
  -4 -13   1  203.88   11.70
   3  13  -1    2.10    3.00
   3  13  -1    4.20    3.80
   3  13  -1    1.70    3.00
  -3 -13   1   -1.60    4.30
  -3 -13   1    1.80    2.90
   2  13  -1   22.50    3.10
   2  13  -1   22.60    3.40
   2  13  -1   31.80    5.70
   2  13  -1   16.90    3.20
  -2 -13   1   17.50    3.50
  -2 -13   1   17.90    4.70
   1  13  -1  112.19    8.30
   1  13  -1   91.69    6.20
   1  13  -1  110.09    6.40
   1  13  -1  105.39    6.20
  -1 -13   1  112.09    6.70
  -1 -13   1   96.89   15.40
  -1 -13   1  112.29    7.50
   0  13  -1   13.50    3.00
   0  13  -1   14.50    2.80
   0  13  -1   18.60    3.10
   0  13  -1   17.30    2.80
   0  13  -1   19.00    4.00
   0 -13   1   18.20    6.70
   0 -13   1   24.00    3.60
  -1  13  -1    2.00    3.40
  -1  13  -1    0.20    2.70
  -1  13  -1   -7.30    5.90
  -1  13  -1    6.50    3.90
  -1  13  -1    0.60    2.60
  -1  13  -1    2.00    3.00
  -1  13  -1   -1.10    2.70
   1 -13   1   -0.40    3.00
   1 -13   1    9.10    6.20
  -2  13  -1  114.29    7.70
  -2  13  -1   98.69    7.30
  -2  13  -1  125.39    8.80
  -2  13  -1  114.39    6.40
  -2  13  -1  112.69    6.70
  -2  13  -1   91.19   11.00
  -2  13  -1  111.19    6.40
   2 -13   1  111.79    7.10
   2 -13   1   97.79   11.40
  -3  13  -1   14.50    7.60
  -3  13  -1   16.30    4.00
  -3  13  -1   17.20    3.30
  -3  13  -1   14.20    3.00
  -3  13  -1   15.10    2.90
  -3  13  -1   15.70    3.20
  -3  13  -1    9.70    3.90
   3 -13   1   19.80    7.20
   3 -13   1   15.10    4.00
  -4  13  -1   -1.80    3.80
  -4  13  -1   -4.90    2.90
  -4  13  -1   -6.90    6.40
  -4  13  -1   -2.90    3.10
  -4  13  -1    0.60    3.90
  -4  13  -1    0.10    2.60
  -4  13  -1   -2.40    3.40
  -4  13  -1   -0.10    2.70
   4 -13   1   -0.20    7.00
  -5  13  -1    2.80    3.40
  -5  13  -1   -2.90    3.40
  -5  13  -1    5.20    2.90
  -5  13  -1    3.60    2.90
  -5  13  -1   -0.40    7.30
  -5  13  -1    1.50    4.20
  -5  13  -1    0.90    4.80
  -5  13  -1    3.50    3.00
   5 -13   1   -0.20    7.50
  -6  13  -1   86.39   12.90
  -6  13  -1  114.49    7.10
  -6  13  -1  106.89    7.10
  -6  13  -1  105.39    7.20
  -6  13  -1   99.19    8.00
  -6  13  -1  104.69    7.90
  -7  13  -1   12.20    4.80
  -7  13  -1    6.40    3.80
  -7  13  -1    8.60    3.80
  -7  13  -1    4.40    4.10
  -7  13  -1    5.40    4.00
   7 -13   1  -13.40    9.00
  -8  13  -1   44.60    6.10
  -8  13  -1   50.89    6.00
  -8  13  -1   49.60    5.50
  -8  13  -1   52.09    7.20
  -8  13  -1   57.49    7.10
   8 -13   1   28.60   10.80
  -9  13  -1    4.20    4.40
  -9  13  -1    8.30    4.20
  -9  13  -1    4.30    4.10
  -9  13  -1    2.30    4.30
  -9  13  -1    4.60    5.10
 -10  13  -1   -2.80    4.60
 -10  13  -1    2.20    4.30
 -10  13  -1    5.40    4.30
 -10  13  -1   -4.40    5.00
 -10  13  -1    2.40    3.40
 -11  13  -1   17.00    4.70
 -11  13  -1   10.80    4.60
 -11  13  -1    5.80    4.70
 -11  13  -1    0.60    5.40
 -12  13  -1   -7.50    4.80
 -12  13  -1   -0.60    4.70
 -12  13  -1   -0.90    4.80
 -12  13  -1    4.20    4.60
 -13  13  -1   10.80    5.10
 -13  13  -1   10.20    4.20
 -13  13  -1    6.60    4.60
 -13  13  -1    8.10    4.60
 -14  13  -1   -6.00    3.90
 -14  13  -1    5.80    4.10
 -14  13  -1    3.00    4.10
  12  12  -1   -4.20    3.20
  12  12  -1   -4.50    2.80
 -12 -12   1    0.70    3.60
 -12 -12   1    4.90    3.60
  11  12  -1   29.00    4.20
  11  12  -1   16.70    3.30
 -11 -12   1   18.20    4.50
 -11 -12   1   21.20    4.40
  10  12  -1   11.90    4.00
  10  12  -1    4.30    3.20
 -10 -12   1    9.80    4.30
 -10 -12   1    6.60    4.60
   9  12  -1    7.10    3.90
   9  12  -1    3.20    3.50
  -9 -12   1    4.70    4.60
  -9 -12   1    3.50    4.20
   8  12  -1   85.59    6.00
   8  12  -1   92.99    7.00
  -8 -12   1   77.89    8.20
  -8 -12   1   85.49    7.30
   7  12  -1   11.10    3.90
   7  12  -1    5.40    3.20
   7  12  -1   10.00    3.40
  -7 -12   1    5.00    4.70
  -7 -12   1    4.20    4.00
   6  12  -1   -2.40    2.80
   6  12  -1    2.00    3.30
   6  12  -1   -3.20    3.00
  -6 -12   1   -2.20    4.50
  -6 -12   1    1.80    3.30
   5  12  -1   35.30    6.10
   5  12  -1   34.60    4.50
   5  12  -1   31.60    4.40
  -5 -12   1   30.00    4.80
  -5 -12   1   30.20    4.70
   4  12  -1   39.30    6.20
   4  12  -1   53.89    4.60
   4  12  -1   44.40    4.80
  -4 -12   1   35.90    5.80
  -4 -12   1   34.90    7.80
  -4 -12   1   45.20    4.70
   3  12  -1  258.27   11.60
   3  12  -1  241.98   11.60
   3  12  -1  238.98   12.60
  -3 -12   1  229.98   15.70
  -3 -12   1  248.08   12.40
  -3 -12   1  241.08   11.70
   2  12  -1   54.99    5.80
   2  12  -1   36.50    4.50
   2  12  -1   51.49    4.20
   2  12  -1   49.50    4.20
  -2 -12   1   41.90    4.60
  -2 -12   1   53.19    6.10
  -2 -12   1   32.10    6.80
   1  12  -1    1.10    3.20
   1  12  -1   -2.20    2.30
   1  12  -1    3.40    3.50
   1  12  -1    3.90    2.80
   1  12  -1    2.40    2.50
  -1 -12   1    4.30    2.60
  -1 -12   1   -3.30    3.90
  -1 -12   1    4.30    5.60
   0  12  -1   12.10    2.50
   0  12  -1   15.10    5.70
   0  12  -1   13.00    2.40
   0  12  -1   16.90    3.70
   0  12  -1    8.80    2.60
   0  12  -1   13.20    3.70
   0  12  -1   17.40    3.10
   0  12  -1   13.90    2.70
   0 -12   1    9.10    6.00
   0 -12   1   12.80    2.90
  -1  12  -1   25.40    3.80
  -1  12  -1   11.40    2.40
  -1  12  -1   16.20    3.10
  -1  12  -1    2.50    5.10
  -1  12  -1   13.80    2.80
  -1  12  -1   14.00    2.70
  -1  12  -1   18.00    3.80
   1 -12   1   10.70    3.10
   1 -12   1    9.10    5.50
  -2  12  -1    1.40    3.20
  -2  12  -1   -2.00    2.20
  -2  12  -1    2.20    2.30
  -2  12  -1    3.00    2.40
  -2  12  -1    0.20    5.50
  -2  12  -1    4.20    2.80
  -2  12  -1   -0.20    3.20
   2 -12   1   -0.60    5.50
   2 -12   1   -1.80    3.40
  -3  12  -1   85.79    9.50
  -3  12  -1   76.79    6.20
  -3  12  -1   65.09    6.20
  -3  12  -1   70.99    4.90
  -3  12  -1   75.99    5.00
  -3  12  -1   76.49    7.20
  -3  12  -1   74.39    5.10
  -3  12  -1   82.39    5.40
   3 -12   1   89.89   10.60
  -4  12  -1    5.40    3.50
  -4  12  -1    7.20    3.60
  -4  12  -1    3.00    2.80
  -4  12  -1    5.20    3.20
  -4  12  -1    2.20    2.80
  -4  12  -1    0.80    2.90
  -4  12  -1    1.10    7.20
  -4  12  -1    2.40    2.60
   4 -12   1    3.60    6.60
  -5  12  -1   18.30    2.90
  -5  12  -1   11.50    4.40
  -5  12  -1   15.80    3.30
  -5  12  -1   13.30    2.90
  -5  12  -1   17.30    7.20
  -5  12  -1   13.20    3.30
  -5  12  -1   10.50    3.80
  -5  12  -1   11.70    2.80
   5 -12   1   13.00    7.70
  -6  12  -1   15.20    8.10
  -6  12  -1    4.00    2.70
  -6  12  -1    9.00    3.40
  -6  12  -1    7.00    4.10
  -6  12  -1    4.90    3.60
  -6  12  -1    1.60    3.40
  -6  12  -1    8.50    4.00
   6 -12   1    9.90    8.20
  -7  12  -1   11.40    3.30
  -7  12  -1   15.90    5.00
  -7  12  -1   17.20    3.40
  -7  12  -1    7.00    3.60
  -7  12  -1   17.40    7.80
  -7  12  -1   15.40    3.70
   7 -12   1    6.00    8.50
  -8  12  -1   -3.00    8.70
  -8  12  -1   -1.50    3.60
  -8  12  -1    2.00    4.40
  -8  12  -1    2.20    3.70
  -8  12  -1    5.00    3.80
  -8  12  -1   -1.60    3.80
   8 -12   1   -2.90    9.30
  -9  12  -1   44.80    7.50
  -9  12  -1   49.99    6.20
  -9  12  -1   51.19    5.60
  -9  12  -1   48.50    6.90
  -9  12  -1   55.69    6.70
   9 -12   1   25.40   11.00
 -10  12  -1    2.20    4.10
 -10  12  -1    0.80    4.30
 -10  12  -1   -0.60    4.70
 -10  12  -1    1.00    4.60
 -11  12  -1    1.90    4.60
 -11  12  -1    1.30    5.20
 -11  12  -1    0.70    4.70
 -11  12  -1    4.80    4.50
 -12  12  -1   11.00    4.50
 -12  12  -1    7.60    5.10
 -12  12  -1    6.50    4.70
 -12  12  -1    7.80    4.50
 -13  12  -1   -4.60    4.90
 -13  12  -1   -5.50    4.60
 -13  12  -1   -7.40    4.40
 -13  12  -1   -1.70    4.30
 -14  12  -1   -2.20    4.00
 -14  12  -1    4.80    4.10
 -14  12  -1    4.60    4.40
 -15  12  -1    1.60    3.70
 -15  12  -1    2.00    3.70
  13  11  -1    5.40    3.20
  13  11  -1   -0.30    2.80
 -13 -11   1   -1.10    3.60
 -13 -11   1    6.00    3.50
  12  11  -1   12.70    5.50
  12  11  -1    5.80    3.20
  12  11  -1    2.90    3.70
 -12 -11   1    6.90    4.20
 -12 -11   1    0.50    3.80
  11  11  -1   42.40    5.40
  11  11  -1   53.59    8.40
  11  11  -1   32.30    4.70
 -11 -11   1   28.00    5.00
 -11 -11   1   39.40    6.20
  10  11  -1   16.20    4.30
  10  11  -1    8.50    5.70
  10  11  -1   18.20    3.70
 -10 -11   1   18.80    4.70
 -10 -11   1    9.50    4.70
   9  11  -1  181.58   11.80
   9  11  -1  187.18   10.20
  -9 -11   1  190.08   10.50
  -9 -11   1  178.78   10.90
   8  11  -1   -0.40    3.30
   8  11  -1    5.60    3.90
   8  11  -1    6.80    4.80
  -8 -11   1    3.30    4.20
  -8 -11   1   -0.80    3.60
   7  11  -1   -3.00    3.70
   7  11  -1   -0.60    3.10
   7  11  -1    0.40    2.70
  -7 -11   1   -2.70    3.30
  -7 -11   1   -3.30    3.70
   6  11  -1    5.60    2.80
   6  11  -1    4.50    2.50
   6  11  -1    3.50    2.90
  -6 -11   1    7.30    6.00
  -6 -11   1    0.10    3.90
  -6 -11   1   -0.80    3.10
   5  11  -1   11.00    3.20
   5  11  -1   13.80    3.70
   5  11  -1    6.10    2.60
   5  11  -1    5.40    3.00
  -5 -11   1    5.30    2.90
  -5 -11   1   11.70    5.90
  -5 -11   1    6.40    4.00
   4  11  -1   25.40    3.40
   4  11  -1   27.80    4.20
   4  11  -1   22.90    3.70
  -4 -11   1   19.30    6.20
  -4 -11   1   22.40    3.80
  -4 -11   1   27.30    3.90
   3  11  -1  247.98   11.70
   3  11  -1  260.27   12.70
   3  11  -1  254.37   11.90
  -3 -11   1  242.58   14.80
  -3 -11   1  246.68   12.70
  -3 -11   1  255.57   11.90
   2  11  -1   11.80    2.40
   2  11  -1   14.70    3.30
   2  11  -1   14.40    2.70
   2  11  -1   14.40    2.20
  -2 -11   1    7.70    4.90
  -2 -11   1   15.90    3.40
  -2 -11   1   13.60    2.70
   1  11  -1   22.80    2.80
   1  11  -1   14.00    3.30
   1  11  -1   20.80    2.50
   1  11  -1   16.60    2.60
   1  11  -1   20.90    4.90
   1  11  -1   24.50    2.80
  -1 -11   1   25.80    3.50
  -1 -11   1   20.00    5.80
   0  11  -1   16.20    2.40
   0  11  -1   12.90    2.20
   0  11  -1   14.40    3.20
   0  11  -1   14.90    2.50
   0  11  -1   13.20    2.60
   0  11  -1   19.80    3.20
   0  11  -1   12.80    2.70
   0  11  -1   20.90    5.50
   0 -11   1   19.10    2.90
   0 -11   1   16.50    5.50
  -1  11  -1    2.30    2.30
  -1  11  -1    4.20    3.00
  -1  11  -1    6.70    2.90
  -1  11  -1    1.50    2.20
  -1  11  -1    3.20    2.60
  -1  11  -1    2.30    5.30
  -1  11  -1    3.90    2.10
   1 -11   1    8.80    2.90
   1 -11   1    2.30    5.00
  -2  11  -1  240.58   11.30
  -2  11  -1  233.48   11.50
  -2  11  -1  248.88   11.30
  -2  11  -1  237.48   15.00
  -2  11  -1  249.08   12.60
  -2  11  -1  247.18   11.90
  -2  11  -1  239.08   11.40
   2 -11   1  259.27   15.30
  -3  11  -1   22.50    2.80
  -3  11  -1   18.70    3.00
  -3  11  -1   18.70    6.40
  -3  11  -1   21.60    3.10
  -3  11  -1   19.60    3.20
  -3  11  -1   18.00    3.40
  -3  11  -1   17.20    3.40
  -3  11  -1   18.70    2.90
   3 -11   1   28.30    6.20
  -4  11  -1   53.39    5.40
  -4  11  -1   51.29    8.80
  -4  11  -1   53.79    4.30
  -4  11  -1   49.00    4.40
  -4  11  -1   47.20    4.80
  -4  11  -1   66.59    5.70
  -4  11  -1   54.19    4.80
  -4  11  -1   50.99    4.70
   4 -11   1   44.70    8.40
  -5  11  -1   33.90    4.50
  -5  11  -1   28.10    3.30
  -5  11  -1   36.00    4.50
  -5  11  -1   42.20    7.80
  -5  11  -1   29.90    5.30
  -5  11  -1   32.40    3.90
  -5  11  -1   30.50    4.60
  -5  11  -1   29.40    5.10
   5 -11   1   28.70    8.00
  -6  11  -1   24.30    3.50
  -6  11  -1   25.80    3.80
  -6  11  -1   22.70    3.90
  -6  11  -1   27.70    3.80
  -6  11  -1   25.30    4.40
  -6  11  -1   27.60    3.40
  -6  11  -1   38.00    8.40
   6 -11   1   19.40    7.80
  -7  11  -1    0.30    3.20
  -7  11  -1   14.20    7.10
  -7  11  -1    5.30    2.60
  -7  11  -1    1.60    2.90
  -7  11  -1    1.20    3.50
  -7  11  -1    2.20    4.00
   7 -11   1    3.50    7.50
  -8  11  -1   -0.80    3.30
  -8  11  -1   -0.30    3.10
  -8  11  -1    3.30    3.90
  -8  11  -1   -2.10    3.40
  -8  11  -1    8.10    2.90
  -8  11  -1   11.80    7.00
   8 -11   1    1.10    7.60
  -9  11  -1    4.40    3.50
  -9  11  -1    2.60    7.50
  -9  11  -1    4.40    3.70
  -9  11  -1   -1.00    3.00
  -9  11  -1   -2.40    4.20
  -9  11  -1    5.20    4.80
   9 -11   1   -5.50    8.80
 -10  11  -1   -2.40    3.60
 -10  11  -1    9.70    4.50
 -10  11  -1    1.80    4.50
 -10  11  -1    3.30    4.60
  10 -11   1    6.80    9.30
 -11  11  -1   27.90    4.70
 -11  11  -1   39.20    6.10
 -11  11  -1   19.70    4.50
 -11  11  -1   18.90    4.90
 -12  11  -1   -0.30    4.30
 -12  11  -1   -4.90    5.20
 -12  11  -1    1.20    4.50
 -12  11  -1    2.20    4.80
 -13  11  -1   30.10    5.10
 -13  11  -1   35.80    5.80
 -13  11  -1   38.70    5.80
 -13  11  -1   36.20    5.80
 -14  11  -1    4.10    4.40
 -14  11  -1    4.70    4.60
 -14  11  -1   -4.00    4.00
 -15  11  -1    0.00    4.00
 -15  11  -1    3.80    3.70
 -15  11  -1    4.60    4.10
  13  10  -1   -3.20    3.30
  13  10  -1    3.00    3.10
  13  10  -1   -0.70    6.00
 -13 -10   1    4.70    4.00
 -13 -10   1    5.10    3.80
  12  10  -1   11.20    3.90
  12  10  -1    7.30    3.40
  12  10  -1   25.90    6.40
 -12 -10   1   14.50    4.70
 -12 -10   1    9.20    4.80
  11  10  -1    6.00    4.00
  11  10  -1   -2.10    3.50
  11  10  -1   -4.10    6.10
 -11 -10   1   -2.90    4.50
 -11 -10   1   -0.20    4.30
  10  10  -1   -0.80    5.30
  10  10  -1    0.80    3.60
  10  10  -1   -4.40    4.10
 -10 -10   1    2.80    4.00
 -10 -10   1   -4.20    4.30
   9  10  -1   46.30    6.50
   9  10  -1   48.80    5.80
   9  10  -1   32.30    4.50
  -9 -10   1   37.30    6.10
  -9 -10   1   43.90    6.20
   8  10  -1   33.00    4.30
   8  10  -1   27.90    5.20
   8  10  -1   29.60    4.00
  -8 -10   1   33.90    4.50
  -8 -10   1   12.80    8.10
  -8 -10   1   32.30    5.70
   7  10  -1   10.90    2.70
   7  10  -1    4.00    2.90
   7  10  -1    0.30    4.10
   7  10  -1    7.90    3.30
  -7 -10   1    3.10    3.40
  -7 -10   1    0.80    6.70
  -7 -10   1    6.30    4.00
   6  10  -1   10.60    2.70
   6  10  -1   17.30    3.20
   6  10  -1    8.80    2.40
   6  10  -1   18.50    3.90
  -6 -10   1   15.70    3.40
  -6 -10   1   15.30    5.80
  -6 -10   1   12.30    3.60
   5  10  -1    7.90    2.20
   5  10  -1   12.90    2.80
   5  10  -1   10.30    2.50
   5  10  -1    7.70    3.20
  -5 -10   1   11.70    3.50
  -5 -10   1   13.70    5.90
  -5 -10   1   10.10    2.80
   4  10  -1   55.09    3.90
   4  10  -1   59.79    4.80
   4  10  -1   72.29    5.90
   4  10  -1   62.39    4.50
  -4 -10   1   61.89    5.30
  -4 -10   1   55.89    4.40
  -4 -10   1   56.19    8.40
   3  10  -1   40.00    4.50
   3  10  -1   29.20    3.50
   3  10  -1   33.00    3.40
  -3 -10   1   41.00    4.70
  -3 -10   1   37.20    3.80
  -3 -10   1   39.70    7.30
   2  10  -1   47.60    3.80
   2  10  -1   52.99    4.80
   2  10  -1   49.20    3.80
   2  10  -1   45.60    3.50
  -2 -10   1   46.80    4.80
  -2 -10   1   51.89    4.10
  -2 -10   1   51.39    7.60
   1  10  -1  104.39    6.50
   1  10  -1   99.59    5.50
   1  10  -1   97.59    5.50
   1  10  -1   92.39    6.20
   1  10  -1  101.19    8.40
  -1 -10   1  107.69    8.70
  -1 -10   1  105.29    5.70
   0  10  -1  156.08    7.80
   0  10  -1  165.98    7.80
   0  10  -1  174.88    9.00
   0  10  -1  154.98   10.20
   0  10  -1  167.18    8.40
   0 -10   1  152.88   11.00
   0 -10   1  148.59    8.10
  -1  10  -1    2.60    2.60
  -1  10  -1    0.70    2.20
  -1  10  -1    1.50    4.20
  -1  10  -1   -2.40    2.70
  -1  10  -1    0.80    2.00
   1 -10   1    0.70    2.70
   1 -10   1   -1.10    4.50
  -2  10  -1   74.29    5.50
  -2  10  -1   67.19    4.30
  -2  10  -1   62.29    4.60
  -2  10  -1   66.69    4.40
  -2  10  -1   63.49    7.20
  -2  10  -1   60.09    4.70
  -2  10  -1   77.19    5.30
   2 -10   1   72.69    8.60
  -3  10  -1    3.20    2.80
  -3  10  -1    5.80    2.50
  -3  10  -1    4.50    2.70
  -3  10  -1    2.90    2.30
  -3  10  -1    2.10    2.50
  -3  10  -1   -5.70    4.40
  -3  10  -1    7.30    2.70
  -3  10  -1    3.90    2.20
   3 -10   1    3.70    5.60
  -4  10  -1    3.70    5.10
  -4  10  -1    7.50    2.60
  -4  10  -1    4.80    3.10
  -4  10  -1    4.20    2.40
  -4  10  -1    3.30    2.70
  -4  10  -1    6.90    2.30
  -4  10  -1    8.80    2.60
  -4  10  -1    0.40    2.50
   4 -10   1    1.20    5.90
  -5  10  -1   87.49    5.40
  -5  10  -1   90.59    5.80
  -5  10  -1   85.09    5.60
  -5  10  -1  101.69    6.90
  -5  10  -1   84.09    5.20
  -5  10  -1  103.69    6.20
  -5  10  -1   83.29    5.50
  -5  10  -1   79.69    9.90
   5 -10   1   79.19   11.20
  -6  10  -1   43.80    5.10
  -6  10  -1   50.69    8.40
  -6  10  -1   41.10    4.50
  -6  10  -1   51.59    4.50
  -6  10  -1   38.90    4.90
  -6  10  -1   45.00    5.30
  -6  10  -1   45.90    5.80
   6 -10   1   36.10    7.60
  -7  10  -1  165.18    8.30
  -7  10  -1  154.08    8.40
  -7  10  -1  149.99    8.90
  -7  10  -1  158.78    8.20
  -7  10  -1  150.38    8.30
  -7  10  -1  169.68   12.60
   7 -10   1  138.59   14.10
  -8  10  -1   14.20    3.30
  -8  10  -1   18.70    3.40
  -8  10  -1   15.60    4.00
  -8  10  -1   16.20    2.80
  -8  10  -1   14.10    3.30
  -8  10  -1   26.50    7.50
   8 -10   1   18.30    9.00
  -9  10  -1   -2.50    3.50
  -9  10  -1    4.50    2.90
  -9  10  -1    2.90    4.20
  -9  10  -1    7.40    3.80
  -9  10  -1   -1.00    3.40
  -9  10  -1    6.60    7.50
   9 -10   1   -1.80    8.60
 -10  10  -1   48.50    6.50
 -10  10  -1   45.10    6.00
 -10  10  -1   31.10    5.20
 -10  10  -1   48.70    7.50
 -10  10  -1   63.09   11.10
  10 -10   1   53.29   11.30
 -11  10  -1    3.80    5.30
 -11  10  -1    3.50    4.40
 -11  10  -1   -3.80    3.80
 -11  10  -1   -2.30    3.60
  11 -10   1   14.70   10.60
 -12  10  -1   45.10    5.60
 -12  10  -1   51.19    7.80
 -12  10  -1   43.30    7.00
 -12  10  -1   54.59    6.20
 -13  10  -1    5.10    4.30
 -13  10  -1    1.20    5.50
 -13  10  -1    2.40    4.80
 -14  10  -1   -0.20    3.90
 -14  10  -1   -2.00    4.80
 -14  10  -1   -3.60    4.70
 -15  10  -1    1.70    4.00
 -15  10  -1    6.90    4.10
 -15  10  -1    2.40    4.60
  14   9  -1    7.90    3.00
 -14  -9   1   12.00    4.10
 -14  -9   1    7.40    3.70
  13   9  -1    0.00    3.70
  13   9  -1   -3.90    3.30
  13   9  -1    3.40    6.10
  13   9  -1   -1.00    4.20
 -13  -9   1   -0.90    4.10
 -13  -9   1    6.20    4.40
  12   9  -1   20.70    6.50
  12   9  -1   13.50    4.10
  12   9  -1   16.40    3.60
 -12  -9   1   20.10    4.80
 -12  -9   1   18.50    5.00
  11   9  -1   14.10    4.10
  11   9  -1   14.80    4.30
  11   9  -1   15.00    6.60
 -11  -9   1    5.50    3.60
 -11  -9   1   14.30    4.80
 -11  -9   1    2.80    4.70
  10   9  -1   21.90    6.10
  10   9  -1   13.90    4.20
  10   9  -1   14.10    4.00
 -10  -9   1   15.70    4.70
 -10  -9   1    7.80    4.10
   9   9  -1    6.20    3.10
   9   9  -1   12.10    3.80
   9   9  -1   -2.00    4.80
  -9  -9   1    1.50    4.00
  -9  -9   1    6.60    4.10
  -9  -9   1   -9.90    7.10
   8   9  -1   35.60    5.30
   8   9  -1   33.00    4.90
   8   9  -1   27.70    3.60
  -8  -9   1   35.70    5.50
  -8  -9   1   15.30    6.70
  -8  -9   1   28.10    4.20
   7   9  -1   17.00    3.00
   7   9  -1   12.90    4.10
   7   9  -1   11.90    3.30
   7   9  -1   13.20    2.80
  -7  -9   1   12.40    3.00
  -7  -9   1    9.10    6.10
  -7  -9   1   10.20    3.40
   6   9  -1    1.70    3.20
   6   9  -1   -0.10    2.10
   6   9  -1   -1.80    2.10
   6   9  -1   -0.90    2.70
  -6  -9   1    2.30    2.80
  -6  -9   1   13.10    5.60
  -6  -9   1   -1.80    3.40
   5   9  -1   81.09    4.60
   5   9  -1   81.69    5.00
   5   9  -1   88.19    6.00
   5   9  -1   75.69    5.00
   5   9  -1   78.09    5.70
  -5  -9   1   75.09    6.00
  -5  -9   1   79.09    5.30
  -5  -9   1   78.09    9.00
   4   9  -1   32.80    4.60
   4   9  -1   29.40    4.70
   4   9  -1   27.10    3.50
   4   9  -1   34.70    3.20
  -4  -9   1   42.90    7.60
  -4  -9   1   36.50    3.40
  -4  -9   1   35.10    4.30
   3   9  -1    1.50    2.10
   3   9  -1   -3.50    2.30
   3   9  -1    4.20    2.10
  -3  -9   1    4.50    3.30
  -3  -9   1    1.70    3.90
  -3  -9   1    2.30    2.10
   2   9  -1   15.00    3.70
   2   9  -1    7.20    2.50
  -2  -9   1    6.20    4.00
   1   9  -1  229.18   12.20
   1   9  -1  208.18   10.60
  -1  -9   1  212.68   12.70
   0   9  -1   43.20    6.50
   0   9  -1   50.99    4.50
   0  -9   1   45.10    7.00
  -1   9  -1    4.10    4.40
  -1   9  -1   10.80    2.70
   1  -9   1    5.20    4.20
  -2   9  -1  287.07   13.40
  -2   9  -1  285.87   15.30
   2  -9   1  278.07   16.00
  -3   9  -1   55.89    7.10
  -3   9  -1   62.79    4.90
   3  -9   1   68.19    7.90
  -4   9  -1   40.70    6.70
  -4   9  -1   39.10    4.20
   4  -9   1   34.90    6.40
  -5   9  -1   26.90    4.00
  -5   9  -1   22.90    2.70
  -5   9  -1   27.00    4.30
  -5   9  -1   28.50    6.30
  -5   9  -1   23.10    3.50
  -5   9  -1   27.30    2.90
  -5   9  -1   21.30    3.10
   5  -9   1   19.00    5.80
  -6   9  -1   19.40    3.40
  -6   9  -1   21.80    2.90
  -6   9  -1   17.20    3.30
  -6   9  -1   21.30    3.00
  -6   9  -1   21.00    2.70
  -6   9  -1   25.80    6.60
  -6   9  -1   17.90    3.10
   6  -9   1   24.30    7.20
  -7   9  -1    4.70    2.60
  -7   9  -1   13.90    3.80
  -7   9  -1    0.40    6.50
  -7   9  -1    2.10    2.80
  -7   9  -1    4.20    2.70
  -7   9  -1    9.90    2.40
   7  -9   1   11.30    6.20
  -8   9  -1    5.90    3.50
  -8   9  -1    6.10    3.20
  -8   9  -1    4.40    2.30
  -8   9  -1   -3.70    6.60
  -8   9  -1    2.10    2.70
  -8   9  -1    2.40    3.00
   8  -9   1    0.90    7.00
  -9   9  -1   27.10    3.60
  -9   9  -1   25.90    3.80
  -9   9  -1   34.30    8.70
  -9   9  -1   22.10    4.20
  -9   9  -1   23.70    3.70
   9  -9   1   23.40    8.40
 -10   9  -1   57.59    6.20
 -10   9  -1   70.49    6.20
 -10   9  -1   66.69    6.50
 -10   9  -1   59.89    5.10
 -10   9  -1   67.79    5.50
 -10   9  -1   63.89   11.20
  10  -9   1   60.59   11.50
 -11   9  -1    7.20    2.90
 -11   9  -1   -5.00    4.40
 -11   9  -1    0.90    3.50
 -11   9  -1    3.50    4.40
 -11   9  -1    6.80    3.80
 -11   9  -1   12.60    9.10
  11  -9   1   -1.10    9.80
 -12   9  -1   19.20    4.70
 -12   9  -1   15.40    3.30
 -12   9  -1   22.50    4.20
 -12   9  -1   16.50    5.40
 -12   9  -1   36.10    5.50
 -13   9  -1   21.40    3.50
 -13   9  -1   18.50    4.20
 -13   9  -1   26.70    5.20
 -13   9  -1   16.60    5.50
 -14   9  -1   40.20    6.60
 -14   9  -1   15.60    4.30
 -14   9  -1   18.50    5.00
 -15   9  -1   -2.30    3.90
 -15   9  -1    2.10    4.30
 -15   9  -1   -3.60    4.50
  15  -9   1   -7.10    3.50
 -16   9  -1    6.30    4.00
 -16   9  -1   12.20    3.80
 -16   9  -1   -1.20    3.50
  16  -9   1    3.40    2.90
  14   8  -1    3.40    5.80
  14   8  -1   -4.20    3.50
  14   8  -1   -0.20    3.20
 -14  -8   1    1.00    4.10
 -14  -8   1    0.80    4.00
  13   8  -1   12.00    6.70
  13   8  -1    1.50    3.80
  13   8  -1    8.60    3.40
 -13  -8   1   15.80    4.90
 -13  -8   1    7.50    4.40
  12   8  -1   19.00    4.30
  12   8  -1   11.70    4.10
  12   8  -1   11.10    6.30
 -12  -8   1    2.40    3.70
 -12  -8   1   10.30    5.30
 -12  -8   1    1.20    4.60
  11   8  -1   12.40    6.20
  11   8  -1   18.70    4.40
  11   8  -1   21.70    4.20
 -11  -8   1   12.30    4.40
 -11  -8   1   16.20    3.90
 -11  -8   1   12.90    5.20
  10   8  -1    1.00    5.50
  10   8  -1   -2.20    3.60
  10   8  -1   -0.50    3.50
 -10  -8   1   -1.30    4.70
 -10  -8   1   -1.90    4.20
 -10  -8   1   -2.50    7.60
 -10  -8   1   -2.90    3.30
   9   8  -1    4.10    2.90
   9   8  -1   21.00    5.30
   9   8  -1   10.30    3.50
  -9  -8   1    8.30    3.50
  -9  -8   1    9.60    2.90
  -9  -8   1   11.40    3.80
  -9  -8   1   -2.80    7.20
   8   8  -1   -1.90    2.60
   8   8  -1   -4.10    3.90
   8   8  -1    7.50    3.10
  -8  -8   1    1.30    2.30
  -8  -8   1    1.50    6.10
  -8  -8   1    4.30    3.80
  -8  -8   1   -0.10    3.00
   7   8  -1   12.80    2.70
   7   8  -1   12.70    2.80
   7   8  -1   11.90    3.70
  -7  -8   1    9.20    2.80
  -7  -8   1   10.30    3.50
  -7  -8   1    8.90    6.00
   6   8  -1   48.70    5.30
   6   8  -1   51.29    3.70
   6   8  -1   57.99    4.30
  -6  -8   1   57.69    4.40
  -6  -8   1   47.10    5.00
  -6  -8   1   67.89    8.10
   5   8  -1   74.59    4.50
   5   8  -1   63.29    4.10
   5   8  -1   56.19    5.10
   5   8  -1   71.59    5.30
  -5  -8   1   70.29    8.30
  -5  -8   1   68.69    4.70
  -5  -8   1   64.49    5.40
   4   8  -1   47.50    4.30
   4   8  -1   55.79    4.70
   4   8  -1   63.69    5.80
  -4  -8   1   51.89    6.70
   3   8  -1   77.69    5.40
   3   8  -1   69.99    5.00
  -3  -8   1   84.39    7.10
   2   8  -1    1.50    2.20
   2   8  -1    3.40    3.20
  -2  -8   1   -0.50    3.90
   1   8  -1    1.60    3.50
   1   8  -1   -1.60    2.10
  -1  -8   1   -0.90    3.70
   0   8  -1  111.09    6.30
   0   8  -1  114.89    7.60
   0  -8   1  108.99    8.40
  -1   8  -1  109.19    8.00
  -1   8  -1  112.89    6.30
   1  -8   1  117.89    8.80
  -2   8  -1   -0.60    2.10
  -2   8  -1    1.90    3.70
   2  -8   1    3.20    4.20
  -3   8  -1   82.19    5.50
  -3   8  -1   97.09    8.30
   3  -8   1   94.89    9.30
  -4   8  -1   56.89    7.60
  -4   8  -1   62.39    4.70
   4  -8   1   75.99    7.90
  -5   8  -1   15.00    4.90
  -5   8  -1   15.30    2.50
   5  -8   1   13.20    5.20
  -6   8  -1  120.99    9.60
  -6   8  -1  121.29    6.60
  -6   8  -1  135.09    7.30
  -6   8  -1  116.39    6.90
  -6   8  -1  132.69    7.40
  -6   8  -1  126.39    6.80
   6  -8   1  144.59   11.60
  -7   8  -1    5.10    5.10
  -7   8  -1   -2.00    3.20
  -7   8  -1    0.10    2.50
  -7   8  -1   -1.10    2.30
  -7   8  -1    1.40    2.50
  -7   8  -1   -7.20    2.90
   7  -8   1   -0.40    5.80
  -8   8  -1  108.09    6.30
  -8   8  -1  103.49    6.10
  -8   8  -1   94.49    5.70
  -8   8  -1  101.69    6.10
  -8   8  -1   89.99    6.70
  -8   8  -1  102.39    9.60
   8  -8   1  101.29   12.20
  -9   8  -1    0.70    2.90
  -9   8  -1   -0.70    3.40
  -9   8  -1   -2.00    2.80
  -9   8  -1   -0.20    6.10
  -9   8  -1    1.80    2.20
  -9   8  -1    1.80    2.90
   9  -8   1   -2.20    7.80
 -10   8  -1   -3.40    3.40
 -10   8  -1    6.10    7.60
 -10   8  -1    7.90    3.70
 -10   8  -1    5.50    2.60
 -10   8  -1    3.90    3.50
 -10   8  -1   -0.50    3.70
  10  -8   1    9.70    8.30
 -11   8  -1   24.90   11.10
 -11   8  -1   16.40    3.90
 -11   8  -1   18.00    4.20
 -11   8  -1   13.90    2.80
 -11   8  -1   15.30    4.20
 -11   8  -1   20.60    4.60
  11  -8   1    2.50   10.10
 -12   8  -1   20.00    4.30
 -12   8  -1   21.80    3.40
 -12   8  -1   22.20    5.00
 -12   8  -1   15.00    5.10
  12  -8   1    8.00   10.00
 -13   8  -1  141.39    8.50
 -13   8  -1  140.29    9.70
 -13   8  -1  145.79    8.30
 -14   8  -1   44.00    6.10
 -14   8  -1   32.30    5.80
 -14   8  -1   35.50    4.90
 -14   8  -1   44.00    7.00
 -15   8  -1    7.60    4.10
 -15   8  -1    3.40    4.80
 -15   8  -1    3.80    4.40
 -16   8  -1    4.50    3.80
 -16   8  -1    3.20    3.80
 -16   8  -1   -0.60    4.00
  15   7  -1    1.50    3.20
  15   7  -1    7.20    3.60
 -15  -7   1   -0.40    3.90
 -15  -7   1    1.20    3.90
  14   7  -1    9.90    3.60
  14   7  -1   15.80    6.70
 -14  -7   1   15.00    4.70
 -14  -7   1    7.40    4.60
  13   7  -1    8.20    3.90
  13   7  -1   -0.90    6.50
  13   7  -1    4.10    4.10
 -13  -7   1    6.40    3.90
 -13  -7   1    4.80    4.70
 -13  -7   1    3.70    4.40
  12   7  -1    9.60    4.30
  12   7  -1    9.40    4.20
  12   7  -1    0.20    6.10
 -12  -7   1    0.50    3.70
 -12  -7   1    0.00    4.90
 -12  -7   1    1.40    4.40
 -12  -7   1    0.50    3.90
  11   7  -1    3.40    5.80
  11   7  -1    6.20    3.60
  11   7  -1    2.60    3.70
 -11  -7   1   -2.00    3.40
 -11  -7   1    2.50    3.30
 -11  -7   1   -2.60    4.00
 -11  -7   1    0.50    4.80
 -11  -7   1    0.10    7.50
  10   7  -1    1.50    5.20
  10   7  -1   -1.40    3.10
  10   7  -1   -1.90    3.40
 -10  -7   1   -1.00    3.10
 -10  -7   1   -1.40    4.50
 -10  -7   1   -7.80    7.20
 -10  -7   1    0.00    3.30
 -10  -7   1    0.60    3.60
   9   7  -1    6.70    4.70
   9   7  -1    8.40    3.30
   9   7  -1    7.50    3.10
  -9  -7   1    4.90    6.20
  -9  -7   1    5.40    2.40
  -9  -7   1    6.30    3.10
  -9  -7   1    2.10    3.70
   8   7  -1   28.30    4.50
   8   7  -1   22.10    3.10
  -8  -7   1   25.70    4.00
  -8  -7   1   23.90    2.90
  -8  -7   1   15.40    3.50
  -8  -7   1   11.20    5.90
   7   7  -1   41.20    3.90
   7   7  -1   45.60    4.80
  -7  -7   1   40.60    3.90
  -7  -7   1   31.00    6.20
  -7  -7   1   48.80    5.40
  -7  -7   1   40.80    4.20
  -7  -7   1   50.19    3.90
   6   7  -1  119.99    6.40
   6   7  -1  121.29    7.40
  -6  -7   1  125.59    9.90
  -6  -7   1  119.39    6.50
  -6  -7   1  128.79    6.40
  -6  -7   1  118.69    7.00
   5   7  -1   35.80    3.90
   5   7  -1   37.70    3.90
  -5  -7   1   28.20    5.60
   4   7  -1  206.58   10.20
   4   7  -1  213.68   10.30
  -4  -7   1  241.48   12.50
   3   7  -1    3.40    2.30
   3   7  -1    3.20    2.30
  -3  -7   1    0.40    3.20
   2   7  -1   72.79    5.40
   2   7  -1   73.89    4.80
  -2  -7   1   65.79    6.80
   1   7  -1   97.79    5.60
   1   7  -1   93.89    6.70
  -1  -7   1  103.29    7.00
   0   7  -1   26.70    4.30
   0   7  -1   15.50    2.50
   0  -7   1   22.60    4.00
  -1   7  -1   22.90    4.00
  -1   7  -1   20.00    2.60
   1  -7   1   27.40    5.20
  -2   7  -1  113.39    8.10
  -2   7  -1   97.69    5.80
   2  -7   1  107.29    8.00
  -3   7  -1  399.96   18.40
  -3   7  -1  348.07   16.80
   3  -7   1  373.36   18.80
  -4   7  -1   -1.80    3.80
  -4   7  -1   -1.10    2.30
   4  -7   1    3.50    4.30
  -5   7  -1   -3.60    4.10
  -5   7  -1    0.90    2.10
   5  -7   1   -1.20    5.00
  -6   7  -1   -1.10    4.30
  -6   7  -1    3.90    2.20
   6  -7   1   -2.50    4.60
  -7   7  -1    3.20    4.90
  -7   7  -1    4.40    2.50
  -7   7  -1    3.30    2.70
  -7   7  -1    2.40    2.90
  -7   7  -1    5.30    2.40
   7  -7   1   -0.80    5.20
  -8   7  -1   79.49    6.10
  -8   7  -1   87.79    5.50
  -8   7  -1   78.59    5.30
  -8   7  -1   79.99    8.50
  -8   7  -1   83.69    5.40
  -8   7  -1   82.09    5.10
   8  -7   1   82.59    9.90
  -9   7  -1   -1.60    2.70
  -9   7  -1    1.80    2.00
  -9   7  -1   -2.30    3.40
  -9   7  -1   -2.00    2.60
  -9   7  -1   -0.50    3.10
  -9   7  -1    1.30    5.50
   9  -7   1    6.10    6.80
 -10   7  -1  124.39    8.70
 -10   7  -1  135.49    7.30
 -10   7  -1  132.89    7.50
 -10   7  -1  110.69    7.90
 -10   7  -1  121.09    7.10
 -10   7  -1  117.79   11.60
  10  -7   1  138.69   13.20
 -11   7  -1    3.10    3.30
 -11   7  -1   -0.40    2.80
 -11   7  -1    0.40    3.80
 -11   7  -1   -3.10    4.20
 -11   7  -1   -2.50    3.80
  11  -7   1    9.30    9.60
 -12   7  -1   53.79    6.80
 -12   7  -1   46.20    5.50
 -12   7  -1   44.20    5.30
 -12   7  -1   50.79    6.50
  12  -7   1   54.49   12.30
 -13   7  -1   16.00    4.90
 -13   7  -1   29.80    4.80
 -13   7  -1   24.40    5.00
 -13   7  -1   26.00    3.90
 -14   7  -1   40.20    7.00
 -14   7  -1   31.60    5.30
 -14   7  -1   27.30    4.10
 -14   7  -1   26.90    4.60
 -15   7  -1    2.50    3.50
 -15   7  -1    3.20    4.70
 -15   7  -1    0.00    4.50
 -15   7  -1    5.80    4.00
 -16   7  -1   56.69    5.00
 -16   7  -1   58.09    6.70
 -16   7  -1   59.89    5.60
 -16   7  -1   60.99    6.30
  15   6  -1   11.00    3.30
  15   6  -1    4.60    5.90
 -15  -6   1    0.70    2.80
 -15  -6   1   12.70    4.40
 -15  -6   1    6.00    4.20
  14   6  -1    8.70    6.50
  14   6  -1    6.40    3.80
 -14  -6   1    0.40    3.40
 -14  -6   1    1.90    3.90
 -14  -6   1    7.80    5.00
 -14  -6   1    4.40    4.30
  13   6  -1   27.30    4.60
  13   6  -1   29.10    6.20
 -13  -6   1   38.50    5.90
 -13  -6   1   27.30    5.50
 -13  -6   1   18.30    3.90
 -13  -6   1   25.90    5.00
  12   6  -1    0.10    5.60
  12   6  -1   -0.10    3.90
  12   6  -1    3.20    3.90
 -12  -6   1    4.00    4.20
 -12  -6   1   -4.50    5.00
 -12  -6   1    6.40    3.50
 -12  -6   1   -1.50    3.90
  11   6  -1   30.10    4.20
  11   6  -1   30.10    4.30
  11   6  -1   33.80    6.30
 -11  -6   1   26.50    5.10
 -11  -6   1   26.00    3.80
 -11  -6   1   32.20    4.20
 -11  -6   1   26.10    4.50
 -11  -6   1   21.20    8.50
  10   6  -1   -2.30    4.40
  10   6  -1    2.00    3.40
 -10  -6   1    0.70    2.80
 -10  -6   1   -0.90    2.90
 -10  -6   1   -3.70    6.40
 -10  -6   1    0.10    3.90
 -10  -6   1    2.80    3.90
   9   6  -1    9.70    2.80
   9   6  -1    6.20    4.40
  -9  -6   1    5.80    3.10
  -9  -6   1    9.10    3.00
  -9  -6   1    8.40    2.50
  -9  -6   1    8.80    6.80
  -9  -6   1    7.00    2.90
  -9  -6   1    9.20    3.50
   8   6  -1   15.30    2.80
   8   6  -1   22.60    4.40
  -8  -6   1   26.00    3.20
  -8  -6   1   23.80    2.90
  -8  -6   1   16.40    2.80
  -8  -6   1   14.40    5.90
  -8  -6   1   19.80    3.00
  -8  -6   1   20.10    3.60
   7   6  -1   40.60    3.80
   7   6  -1   45.20    4.90
  -7  -6   1   42.60    4.00
  -7  -6   1   41.20    7.00
  -7  -6   1   47.80    4.70
  -7  -6   1   42.20    4.20
  -7  -6   1   41.90    4.00
  -6  -6   1   46.40    7.30
  -5  -6   1  152.98   10.20
  -5  -6   1  144.89    7.70
  -4  -6   1    3.80    2.50
  -4  -6   1    2.30    3.90
   3   6  -1   24.20    3.20
  -3  -6   1   21.00    3.90
   2   6  -1  641.24   28.30
   1   6  -1  103.29    6.50
  -1  -6   1  104.59    7.20
   0   6  -1  885.11   38.90
   0  -6   1  886.01   39.10
  -1   6  -1   57.39    5.40
   1  -6   1   74.99    6.10
  -2   6  -1    7.30    3.90
   2  -6   1    7.50    3.60
  -3   6  -1  292.47   14.60
   3  -6   1  286.27   14.80
  -4   6  -1  516.95   24.00
   4  -6   1  506.15   24.20
  -5   6  -1    7.20    4.20
   5  -6   1    6.50    4.50
  -6   6  -1  195.78   11.70
   6  -6   1  198.28   12.40
  -7   6  -1   72.79    8.30
   7  -6   1   77.69    8.60
  -8   6  -1    3.50    2.70
  -8   6  -1   -0.40    3.10
  -8   6  -1    1.40    2.30
  -8   6  -1    0.40    2.30
  -8   6  -1   -0.70    5.40
  -8   6  -1    0.60    4.20
   8  -6   1    2.80    5.30
  -9   6  -1   -2.40    2.40
  -9   6  -1    6.60    2.80
  -9   6  -1    4.50    3.60
  -9   6  -1    3.80    2.60
  -9   6  -1   -3.10    5.40
  -9   6  -1   -0.30    2.10
   9  -6   1    5.80    6.20
 -10   6  -1   10.00    2.50
 -10   6  -1    6.90    2.90
 -10   6  -1   11.90    3.10
 -10   6  -1    5.70    3.90
 -10   6  -1   15.70    6.60
 -10   6  -1    6.50    3.10
  10  -6   1   13.10    7.40
 -11   6  -1   31.70    4.50
 -11   6  -1   25.60    4.00
 -11   6  -1   27.30    4.70
 -11   6  -1   24.50    4.00
  11  -6   1   31.50    9.70
 -12   6  -1    7.80    3.60
 -12   6  -1    7.90    4.60
 -12   6  -1    4.50    4.00
 -12   6  -1    4.00    3.20
  12  -6   1    4.80    9.50
 -13   6  -1    6.20    4.30
 -13   6  -1    6.70    4.60
 -13   6  -1    2.30    5.30
 -13   6  -1    7.90    3.60
 -14   6  -1   -0.40    4.40
 -14   6  -1   -0.50    4.60
 -14   6  -1    1.40    4.80
 -14   6  -1    8.30    3.80
 -15   6  -1    5.30    5.10
 -15   6  -1   15.40    4.60
 -15   6  -1    6.70    4.60
 -15   6  -1    9.00    3.70
 -16   6  -1   -0.10    4.40
 -16   6  -1    4.10    3.90
 -16   6  -1    7.30    3.80
 -16   6  -1    2.00    3.40
 -17   6  -1   -3.90    3.70
 -17   6  -1    0.10    3.30
  16   5  -1   -1.10    3.50
  16   5  -1    0.60    2.90
 -16  -5   1   -0.80    3.60
 -16  -5   1    2.00    2.50
 -16  -5   1    2.70    3.80
  15   5  -1   -7.70    6.20
  15   5  -1    1.90    3.50
 -15  -5   1   -1.30    3.10
 -15  -5   1    4.30    4.80
 -15  -5   1   -3.80    4.50
  14   5  -1    3.50    4.00
  14   5  -1    3.90    6.40
 -14  -5   1    3.50    5.20
 -14  -5   1    4.50    3.60
 -14  -5   1    9.80    4.10
 -14  -5   1   -0.30    4.20
  13   5  -1   26.20    4.40
  13   5  -1   25.70    6.20
 -13  -5   1   23.80    4.20
 -13  -5   1   22.60    5.20
 -13  -5   1   22.40    4.90
 -13  -5   1   13.20    4.40
  12   5  -1   26.50    4.60
  12   5  -1   20.20    4.20
  12   5  -1   26.90    5.90
 -12  -5   1   25.90    3.90
 -12  -5   1   31.60    5.00
 -12  -5   1   20.10    5.50
 -12  -5   1   31.90    9.10
 -12  -5   1   27.70    4.40
  11   5  -1   22.50    3.90
  11   5  -1   18.20    5.50
 -11  -5   1   16.10    4.60
 -11  -5   1   21.30    8.10
 -11  -5   1   14.40    3.20
 -11  -5   1   23.60    4.10
 -11  -5   1   29.30    3.90
  10   5  -1   17.60    3.30
  10   5  -1   10.10    5.00
 -10  -5   1   16.40    3.20
 -10  -5   1    9.80    6.50
 -10  -5   1   10.40    3.00
 -10  -5   1    8.30    3.80
 -10  -5   1   11.20    3.50
 -10  -5   1   15.60    3.50
   9   5  -1   10.00    3.00
   9   5  -1    8.30    3.90
  -9  -5   1    6.90    3.30
  -9  -5   1    6.80    2.90
  -9  -5   1    6.00    2.90
  -9  -5   1    9.10    6.40
  -9  -5   1    8.80    2.60
  -9  -5   1    7.30    3.40
   8   5  -1   22.20    3.40
  -8  -5   1   24.00    3.70
  -8  -5   1   21.00    2.70
  -8  -5   1   29.60    3.50
  -8  -5   1   25.40    3.80
  -8  -5   1   18.50    3.00
  -8  -5   1   21.20    5.70
  -7  -5   1   60.99    4.30
  -7  -5   1   57.19    7.30
  -7  -5   1   61.29    4.50
  -7  -5   1   62.69    5.20
  -6  -5   1  116.09    8.30
  -6  -5   1  103.19    6.50
  -5  -5   1   37.60    5.50
  -5  -5   1   33.80    4.30
  -4  -5   1  617.64   28.10
   3   5  -1   22.40    2.70
  -3  -5   1   16.50    3.50
   2   5  -1  105.79    5.90
  -2  -5   1  106.59    7.20
   1   5  -1   40.80    4.10
  -1  -5   1   37.80    4.90
   0   5  -1   19.80    4.10
   0  -5   1   17.80    3.50
  -1   5  -1  635.94   28.20
   1  -5   1  628.24   28.30
  -2   5  -1   94.19    6.50
   2  -5   1   88.09    7.00
  -3   5  -1  742.33   32.60
   3  -5   1  719.53   32.80
  -4   5  -1    5.40    3.50
   4  -5   1    0.90    3.50
  -5   5  -1  970.10   42.80
   5  -5   1  951.30   42.90
  -6   5  -1  169.98   10.60
   6  -5   1  181.28   11.40
  -7   5  -1   13.00    4.70
   7  -5   1   16.40    5.30
  -8   5  -1   39.10    3.90
  -8   5  -1   51.99    4.90
  -8   5  -1   37.20    3.90
  -8   5  -1   37.40    7.30
  -9   5  -1   20.60    5.70
  -9   5  -1   19.00    2.90
  -9   5  -1    8.90    3.60
  -9   5  -1   17.20    2.90
  -9   5  -1   16.50    3.30
  -9   5  -1   12.60    2.80
 -10   5  -1    1.30    2.70
 -10   5  -1   -1.00    2.50
 -10   5  -1   -3.20    2.60
 -10   5  -1    0.70    3.20
 -10   5  -1    1.40    3.50
 -10   5  -1   -3.70    5.20
  10  -5   1    2.90    6.80
 -11   5  -1    1.00    2.60
 -11   5  -1    7.10    4.50
 -11   5  -1    0.00    2.80
 -11   5  -1    3.20    3.20
 -11   5  -1   -3.00    3.00
  11  -5   1   -2.30    7.60
 -12   5  -1    9.40    4.60
 -12   5  -1    7.60    3.40
 -12   5  -1    3.20    3.00
 -12   5  -1    0.70    3.90
 -12   5  -1    4.50    3.60
  12  -5   1   18.40   10.00
 -13   5  -1  157.58    9.30
 -13   5  -1  163.18    9.20
 -13   5  -1  175.28   10.00
 -13   5  -1  178.48   11.00
  13  -5   1  145.89   15.60
 -14   5  -1    7.30    3.50
 -14   5  -1    4.00    4.60
 -14   5  -1    8.60    3.90
 -14   5  -1   12.30    5.40
  14  -5   1   -0.50    4.20
 -15   5  -1   10.90    4.40
 -15   5  -1    6.70    5.20
 -15   5  -1   20.10    4.00
 -15   5  -1   14.40    4.70
  15  -5   1   11.50    4.20
 -16   5  -1   -3.50    3.90
 -16   5  -1    2.70    4.30
 -16   5  -1   -2.30    3.40
 -16   5  -1   -1.60    3.80
 -17   5  -1    1.90    3.60
 -17   5  -1   -2.40    3.00
 -17   5  -1    1.80    3.70
  16   4  -1    3.50    3.00
 -16  -4   1    4.70    3.90
 -16  -4   1    3.20    2.90
 -16  -4   1    7.30    4.20
  15   4  -1    0.60    3.40
  15   4  -1   -6.20    6.50
 -15  -4   1    7.10    5.10
 -15  -4   1   -0.20    3.80
 -15  -4   1   -4.30    3.40
 -15  -4   1   -6.10    4.60
  14   4  -1    3.10    3.60
  14   4  -1    3.40    6.60
 -14  -4   1    8.20    5.20
 -14  -4   1   10.30    4.40
 -14  -4   1    7.00    4.00
 -14  -4   1   11.50    4.80
  13   4  -1    2.60    6.40
  13   4  -1   -2.90    3.80
 -13  -4   1    1.20    5.50
 -13  -4   1    4.20    3.80
 -13  -4   1   -0.60    4.30
 -13  -4   1   -2.00    3.80
  12   4  -1   52.19    5.80
  12   4  -1   50.99    8.80
 -12  -4   1   66.99    7.50
 -12  -4   1   51.59    5.50
 -12  -4   1   48.80    5.80
 -12  -4   1   60.29   10.80
 -12  -4   1   51.39    5.60
  11   4  -1   30.80    4.80
  11   4  -1   38.20    6.00
 -11  -4   1   40.80    8.70
 -11  -4   1   29.10    4.80
 -11  -4   1   30.20    5.00
 -11  -4   1   33.90    4.30
 -11  -4   1   36.10    5.90
  10   4  -1   39.80    5.60
  10   4  -1   30.00    4.30
 -10  -4   1   31.50    4.20
 -10  -4   1   25.20    3.90
 -10  -4   1   39.40    8.00
 -10  -4   1   38.70    4.70
 -10  -4   1   38.00    5.30
 -10  -4   1   33.10    4.00
   9   4  -1  209.68   10.60
  -9  -4   1  223.18   11.30
  -9  -4   1  217.38   14.20
  -9  -4   1  236.58   10.80
  -9  -4   1  230.58   10.70
  -9  -4   1  223.68   10.70
  -9  -4   1  232.08   10.90
   8   4  -1    1.40    2.20
  -8  -4   1    3.10    3.50
  -8  -4   1    5.30    2.40
  -8  -4   1    2.90    2.90
  -8  -4   1   -2.40    2.50
  -8  -4   1   -1.20    4.60
  -8  -4   1    2.80    2.20
  -8  -4   1    4.10    2.20
  -7  -4   1   77.59    7.50
  -7  -4   1   72.39    5.60
  -6  -4   1 1335.67   57.19
  -6  -4   1 1332.17   58.59
  -5  -4   1  259.77   13.50
  -5  -4   1  267.47   12.30
  -4  -4   1  158.68    9.10
  -3  -4   1   30.50    4.30
   2   4  -1  515.25   23.50
  -2  -4   1  566.84   24.30
   1   4  -1   11.80    2.30
  -1  -4   1    7.10    2.80
   0   4  -1 8930.61  360.36
   0  -4   1 8116.69  360.46
  -1   4  -1   21.00    3.70
   1  -4   1   26.00    4.20
  -2   4  -1 3060.39  132.89
   2  -4   1 3188.48  133.09
  -3   4  -1   72.39    5.60
   3  -4   1   67.99    5.80
  -4   4  -1  184.78    9.90
   4  -4   1  182.48   10.40
  -5   4  -1  118.89    7.70
  -6   4  -1    4.10    3.60
  -6   4  -1    1.30    3.40
  -7   4  -1  384.66   19.40
  -7   4  -1  390.76   19.30
  -8   4  -1   77.69    7.60
  -8   4  -1   75.99    7.90
  -9   4  -1   13.10    5.30
  -9   4  -1    6.60    2.50
  -9   4  -1    7.30    2.60
  -9   4  -1    5.50    3.40
  -9   4  -1   10.70    2.50
  -9   4  -1    6.20    2.70
  -9   4  -1   -3.80    4.70
 -10   4  -1    6.30    3.80
 -10   4  -1   12.20    5.70
 -10   4  -1   10.90    2.70
 -10   4  -1   15.40    2.70
 -10   4  -1   14.80    3.40
 -10   4  -1   14.50    3.00
 -11   4  -1   77.19    6.40
 -11   4  -1   68.09    5.40
 -11   4  -1   67.69    5.40
 -11   4  -1   68.89    7.30
 -11   4  -1   66.79    5.60
 -12   4  -1   20.20    3.90
 -12   4  -1   21.20    3.80
 -12   4  -1   20.00    3.40
 -12   4  -1   18.50    3.50
 -12   4  -1   18.30    4.80
 -13   4  -1   -0.70    4.80
 -13   4  -1    6.50    3.80
 -13   4  -1   -1.20    4.20
 -13   4  -1    3.30    3.50
 -13   4  -1   10.40    4.40
  13  -4   1    3.90    9.10
 -14   4  -1   27.70    4.90
 -14   4  -1   38.90    4.90
 -14   4  -1   34.20    6.20
 -14   4  -1   32.70    5.00
 -15   4  -1    3.10    3.80
 -15   4  -1    3.70    4.10
 -15   4  -1    8.50    5.30
 -15   4  -1   10.70    4.30
  15  -4   1    1.80    4.20
 -16   4  -1    3.40    4.80
 -16   4  -1    5.20    3.90
 -16   4  -1   12.00    3.60
  16  -4   1    7.80    3.80
 -17   4  -1    0.50    3.60
 -17   4  -1   -3.30    3.10
 -17   4  -1   -1.80    3.70
  17  -4   1   -3.10    3.00
  16   3  -1    7.10    3.10
  16   3  -1    6.30    6.20
 -16  -3   1   -1.40    4.40
 -16  -3   1   12.10    4.10
 -16  -3   1    3.40    3.10
  15   3  -1   -3.20    3.50
  15   3  -1    0.90    6.80
 -15  -3   1   -4.00    4.10
 -15  -3   1   -2.20    5.30
 -15  -3   1    3.20    3.90
 -15  -3   1    2.40    3.70
  14   3  -1   58.09    9.00
  14   3  -1   48.50    5.40
 -14  -3   1   45.10    6.30
 -14  -3   1   53.79    6.20
 -14  -3   1   43.40    6.60
 -14  -3   1   42.60    6.00
  13   3  -1   45.00    7.00
  13   3  -1   41.40    4.70
 -13  -3   1   31.00    5.00
 -13  -3   1   23.70    5.00
 -13  -3   1   30.80    4.60
 -13  -3   1   54.19    7.70
  12   3  -1   29.70    6.40
 -12  -3   1   14.10    8.50
 -12  -3   1   32.30    5.30
 -12  -3   1   34.80    5.50
 -12  -3   1   24.10    5.40
 -12  -3   1   33.00    5.30
  11   3  -1    1.10    5.10
 -11  -3   1   -1.60    2.60
 -11  -3   1    2.40    4.30
 -11  -3   1    6.00    3.30
 -11  -3   1    0.60    3.10
 -11  -3   1    0.00    3.20
 -11  -3   1    9.20    6.70
  10   3  -1    0.90    2.70
 -10  -3   1    4.90    3.20
 -10  -3   1   -1.50    2.80
 -10  -3   1    2.90    3.00
 -10  -3   1    1.50    3.30
 -10  -3   1    2.70    2.80
 -10  -3   1   -0.50    5.50
   9   3  -1   63.19    4.90
  -9  -3   1   80.99    6.40
  -9  -3   1   82.99    5.70
  -9  -3   1   76.89    5.00
  -9  -3   1   56.09    8.10
  -9  -3   1   86.89    5.40
  -9  -3   1   64.59    4.90
  -9  -3   1   66.09    5.10
  -8  -3   1  229.08   11.20
  -8  -3   1  216.48   10.40
  -8  -3   1  209.08   10.40
  -8  -3   1  217.28   13.10
  -8  -3   1  227.38   10.30
  -7  -3   1  113.39    6.70
  -7  -3   1  111.09    9.20
  -6  -3   1   19.60    3.00
  -6  -3   1   18.10    4.20
  -5  -3   1   62.89    5.70
  -4  -3   1    3.40    2.80
  -3  -3   1  471.15   21.30
   2   3  -1 1887.11   79.99
  -2  -3   1 1889.11   80.69
   1   3  -1   79.69    4.60
  -1  -3   1   85.29    5.10
   0   3  -1 1462.35   61.29
   0  -3   1 1410.66   61.49
  -1   3  -1   14.80    2.90
   1  -3   1   10.90    2.60
  -2   3  -1  288.97   13.90
   2  -3   1  309.37   14.00
  -3   3  -1  273.47   13.10
   3  -3   1  274.27   13.30
  -4   3  -1  374.16   17.10
  -4   3  -1  353.36   16.90
  -5   3  -1   34.20    4.80
  -5   3  -1   24.70    4.20
  -6   3  -1   29.80    5.30
  -6   3  -1   32.60    4.80
  -7   3  -1    0.20    3.80
  -7   3  -1    2.70    3.70
  -8   3  -1   -3.80    4.20
  -8   3  -1   -0.90    4.40
   8  -3   1   -3.00    2.50
  -9   3  -1   27.90    3.50
  -9   3  -1   26.50    3.40
  -9   3  -1   27.90    4.00
  -9   3  -1   16.40    4.90
  -9   3  -1   33.30    6.30
  -9   3  -1   27.70    4.80
  -9   3  -1   24.40    2.90
   9  -3   1   27.20    4.60
 -10   3  -1   -4.70    3.50
 -10   3  -1    0.80    4.90
 -10   3  -1    1.20    2.60
 -10   3  -1   -2.30    2.80
 -10   3  -1    1.90    2.40
 -10   3  -1   -1.70    2.50
  10  -3   1   -2.00    3.40
 -11   3  -1   58.79    5.10
 -11   3  -1   60.69    5.00
 -11   3  -1   63.09    5.40
 -11   3  -1   62.99    9.20
 -11   3  -1   56.99    6.10
 -11   3  -1   68.39    7.30
  11  -3   1   69.89    6.70
 -12   3  -1    5.20    3.40
 -12   3  -1    0.00    5.00
 -12   3  -1    0.50    2.90
 -12   3  -1    5.90    7.00
 -12   3  -1   -0.90    3.60
 -12   3  -1    2.60    3.10
  12  -3   1   14.50    4.70
 -13   3  -1    6.20    5.40
 -13   3  -1    8.50    3.60
 -13   3  -1    4.80    3.90
 -13   3  -1    7.40    3.90
 -13   3  -1   12.10    4.20
 -14   3  -1   -0.40    4.30
 -14   3  -1    0.90    4.30
 -14   3  -1   -1.80    3.80
 -14   3  -1    4.00    3.70
 -14   3  -1   -0.60    5.40
 -15   3  -1   26.80    4.70
 -15   3  -1   33.00    5.50
 -15   3  -1   42.60    6.10
 -15   3  -1   28.90    5.70
 -16   3  -1   -0.90    5.10
 -16   3  -1    7.40    3.80
 -16   3  -1   -0.30    4.00
  16  -3   1    4.20    3.90
 -17   3  -1   -3.50    3.90
 -17   3  -1    3.00    3.20
 -17   3  -1   -0.30    3.60
  17  -3   1    0.90    3.20
  17   2  -1    3.70    2.60
  17   2  -1    4.20    3.40
 -17  -2   1    2.20    3.70
 -17  -2   1    5.80    2.70
 -17  -2   1   10.40    3.60
  16   2  -1    1.10    3.00
  16   2  -1    1.70    6.40
 -16  -2   1   -0.40    4.70
 -16  -2   1    5.70    4.10
 -16  -2   1    0.30    3.40
  15   2  -1   25.90    7.20
  15   2  -1   21.50    4.00
 -15  -2   1   39.30    4.70
 -15  -2   1   26.30    5.80
 -15  -2   1   17.80    4.30
 -15  -2   1   22.40    5.10
  14   2  -1    7.80    6.80
  14   2  -1    0.90    3.70
 -14  -2   1    8.80    4.80
 -14  -2   1   -5.30    5.50
 -14  -2   1   11.70    4.40
 -14  -2   1    6.80    4.20
  13   2  -1   12.80    3.70
  13   2  -1   25.10    6.70
 -13  -2   1   15.70    3.80
 -13  -2   1   19.50    4.60
 -13  -2   1   19.90    5.70
 -13  -2   1   15.00    3.90
 -13  -2   1   16.80    8.60
  12   2  -1    3.30    5.70
 -12  -2   1    7.00    8.00
 -12  -2   1   10.40    3.50
 -12  -2   1    5.50    4.20
 -12  -2   1    4.20    4.50
 -12  -2   1    2.10    3.40
  11   2  -1   -0.70    4.70
 -11  -2   1    3.90    6.60
 -11  -2   1    2.50    4.20
 -11  -2   1    3.00    2.90
 -11  -2   1    3.00    2.80
 -11  -2   1    6.60    3.20
 -11  -2   1   -2.50    3.10
 -10  -2   1   14.90    3.10
 -10  -2   1   15.30    3.70
 -10  -2   1   14.00    3.10
 -10  -2   1   13.40    3.10
 -10  -2   1    5.10    5.40
 -10  -2   1    9.00    2.70
  -9  -2   1   36.50    3.90
  -9  -2   1   33.10    4.00
  -9  -2   1   41.00    3.80
  -9  -2   1   37.60    6.70
  -9  -2   1   35.30    4.70
  -9  -2   1   41.60    3.80
  -9  -2   1   40.10    5.80
  -8  -2   1    7.20    4.40
  -8  -2   1    6.80    3.30
  -7  -2   1    9.50    3.10
  -7  -2   1    3.00    3.90
  -6  -2   1  585.54   26.30
  -6  -2   1  555.64   25.00
  -5  -2   1  496.55   22.80
  -4  -2   1  284.37   13.60
  -3  -2   1   49.70    4.40
   2   2  -1    6.40    1.10
  -2  -2   1    9.30    2.30
   1   2  -1  465.75   20.10
  -1  -2   1  471.75   20.50
   0   2  -1   68.39    3.60
   0  -2   1   69.09    4.00
  -1   2  -1   36.80    2.70
   1  -2   1   32.50    3.00
  -2   2  -1   26.40    2.90
  -3   2  -1 1216.18   51.49
  -3   2  -1 1176.28   51.39
  -4   2  -1   41.80    4.10
  -4   2  -1   44.40    4.70
  -5   2  -1    7.40    3.20
  -5   2  -1   10.10    2.80
  -6   2  -1   75.39    6.70
  -6   2  -1   89.59    6.30
  -7   2  -1    6.30    4.10
  -7   2  -1   10.00    3.80
  -8   2  -1   72.29    6.90
  -8   2  -1   74.29    7.50
   8  -2   1   60.09    4.90
  -9   2  -1    7.80    5.40
  -9   2  -1    5.30    2.20
  -9   2  -1    2.90    2.10
  -9   2  -1   -0.90    3.10
  -9   2  -1    4.20    2.60
  -9   2  -1    5.40    2.50
   9  -2   1    3.80    3.10
 -10   2  -1   55.79    8.30
 -10   2  -1   51.99    5.50
 -10   2  -1   58.39    5.40
 -10   2  -1   50.39    4.50
 -10   2  -1   53.49    4.30
 -10   2  -1   51.89    5.10
  10  -2   1   48.80    5.90
 -11   2  -1   -3.20    4.30
 -11   2  -1    9.40    6.20
 -11   2  -1   -0.90    2.90
 -11   2  -1    0.20    2.60
 -11   2  -1    4.80    3.00
 -11   2  -1   -1.60    3.40
  11  -2   1    5.80    4.10
 -12   2  -1   -6.80    7.00
 -12   2  -1   -0.60    3.60
 -12   2  -1   -1.50    3.80
 -12   2  -1   -5.30    4.60
 -12   2  -1   -1.10    3.40
 -12   2  -1   -1.50    3.00
  12  -2   1    4.20    4.90
 -13   2  -1   14.20    5.80
 -13   2  -1   12.00    8.20
 -13   2  -1   13.40    4.00
 -13   2  -1   10.30    4.30
 -13   2  -1   13.90    3.80
 -13   2  -1   16.80    3.90
  13  -2   1   23.60    5.70
 -14   2  -1    4.00    3.80
 -14   2  -1   10.20    4.30
 -14   2  -1    1.30    5.50
 -14   2  -1   -0.10    3.50
 -14   2  -1    3.00    4.40
  14  -2   1   -9.50    5.90
 -15   2  -1    4.20    4.40
 -15   2  -1    1.30    5.40
 -15   2  -1   -0.80    3.70
 -16   2  -1    7.50    3.70
 -16   2  -1   -3.80    4.60
 -16   2  -1    8.60    4.10
  16  -2   1    4.60    4.20
 -17   2  -1   -3.90    2.90
 -17   2  -1   -6.40    3.80
 -17   2  -1    5.60    3.70
  17  -2   1    0.90    3.30
  17   1  -1   -2.60    3.50
 -17  -1   1    5.40    3.80
 -17  -1   1    3.70    2.80
 -17  -1   1    1.20    3.70
  16   1  -1    2.90    3.00
  16   1  -1   -6.00    5.90
 -16  -1   1    0.40    3.60
 -16  -1   1    2.10    4.60
 -16  -1   1   -0.50    4.10
 -16  -1   1    0.90    3.60
  15   1  -1   -0.30    3.40
  15   1  -1   12.20    6.70
 -15  -1   1   12.10    4.80
 -15  -1   1    6.20    4.10
 -15  -1   1    2.30    5.60
 -15  -1   1    7.40    4.30
  14   1  -1   44.80    4.90
  14   1  -1   63.19    9.20
 -14  -1   1   40.80    5.90
 -14  -1   1   32.60    4.90
 -14  -1   1   38.60    6.50
 -14  -1   1   40.40    6.10
  13   1  -1  156.48   11.40
  13   1  -1  145.39    8.20
 -13  -1   1  162.18    9.20
 -13  -1   1  150.38    9.50
 -13  -1   1  150.08    8.60
 -13  -1   1  155.18   10.40
 -13  -1   1  127.09   15.10
  12   1  -1   15.90    5.80
 -12  -1   1    7.80    3.10
 -12  -1   1   11.20    3.90
 -12  -1   1   12.10    8.00
 -12  -1   1    8.70    3.10
 -12  -1   1    5.60    4.30
 -12  -1   1    8.20    3.80
  11   1  -1    2.40    4.50
 -11  -1   1    5.80    4.40
 -11  -1   1    3.30    2.60
 -11  -1   1   -2.30    6.40
 -11  -1   1   -0.20    3.00
 -11  -1   1    4.80    3.10
 -11  -1   1    4.50    3.10
 -10  -1   1   45.70    4.40
 -10  -1   1   59.89    4.50
 -10  -1   1   49.40    4.50
 -10  -1   1   62.19    5.40
 -10  -1   1   49.50    5.90
 -10  -1   1   51.09    7.90
 -10  -1   1   48.50    4.30
  -9  -1   1  107.69    8.80
  -9  -1   1  102.89    6.90
  -9  -1   1  104.09    6.00
  -9  -1   1   98.79    6.10
  -9  -1   1   94.09    6.50
  -9  -1   1  107.69    6.00
  -9  -1   1  104.39    5.90
  -8  -1   1  231.68   13.50
  -8  -1   1  249.48   11.80
  -7  -1   1  210.58   11.80
  -7  -1   1  200.78   10.00
  -6  -1   1    2.30    1.30
  -6  -1   1   -0.30    2.70
  -6  -1   1   -0.60    3.20
  -5  -1   1   12.60    3.30
  -5  -1   1    8.60    1.50
  -4  -1   1    0.80    2.70
  -3  -1   1  337.97   15.40
  -2  -1   1  386.76   17.10
   1   1  -1  284.87   12.20
  -1  -1   1  288.07   12.60
   0   1  -1 1101.79   45.90
   0  -1   1 1059.39   46.00
  -1   1  -1  148.29    6.90
   1  -1   1  155.98    7.10
  -2   1  -1   81.29    4.40
  -2   1  -1   73.39    4.40
  -3   1  -1   37.00    3.40
  -3   1  -1   30.00    3.50
  -4   1  -1   53.69    4.10
  -4   1  -1   57.09    4.80
  -5   1  -1  206.38   10.20
  -5   1  -1  204.68   10.80
  -6   1  -1   11.20    3.10
  -6   1  -1   11.00    3.60
  -7   1  -1   45.50    5.20
  -7   1  -1   61.99    6.80
  -8   1  -1  105.59    8.30
  -8   1  -1   97.19    7.10
   8  -1   1  107.49    6.70
  -9   1  -1   50.69    4.20
  -9   1  -1   46.90    7.30
  -9   1  -1   54.59    4.10
  -9   1  -1   50.89    3.90
  -9   1  -1   50.69    5.20
   9  -1   1   47.40    5.60
 -10   1  -1    3.20    2.60
 -10   1  -1    1.00    3.40
 -10   1  -1   -0.40    3.10
 -10   1  -1    0.60    2.60
 -10   1  -1   -0.10    5.40
 -10   1  -1    0.60    2.30
  10  -1   1    2.70    3.60
 -11   1  -1    6.60    3.40
 -11   1  -1   -1.80    3.00
 -11   1  -1    3.70    2.70
 -11   1  -1    6.20    3.00
 -11   1  -1    6.90    6.50
 -11   1  -1    6.50    4.00
  11  -1   1    7.70    2.60
  11  -1   1    4.40    3.80
 -12   1  -1    9.00    3.60
 -12   1  -1   21.60    7.30
 -12   1  -1   10.00    3.60
 -12   1  -1   13.50    4.00
 -12   1  -1    7.70    3.30
 -12   1  -1    7.50    5.00
  12  -1   1   14.10    5.00
  12  -1   1   12.50    3.20
 -13   1  -1   57.69    5.80
 -13   1  -1   62.19    6.60
 -13   1  -1   56.49    5.80
 -13   1  -1   66.09   12.10
 -13   1  -1   45.30    8.30
 -13   1  -1   62.79    5.70
  13  -1   1   63.79    9.00
 -14   1  -1   -2.40    3.90
 -14   1  -1   -1.70    3.80
 -14   1  -1   -5.70    5.70
 -14   1  -1   -2.00    3.50
  14  -1   1   -9.80    6.00
 -15   1  -1    1.30    3.50
 -15   1  -1   -6.60    3.90
 -15   1  -1  -13.50    5.10
  15  -1   1   -0.90    6.30
 -16   1  -1    1.80    4.10
 -16   1  -1   -3.00    3.60
 -16   1  -1   -4.70    5.00
  16  -1   1    1.40    4.00
 -17   1  -1    2.40    3.60
 -17   1  -1   -2.80    4.00
 -17   1  -1   -1.00    3.00
  17  -1   1    0.00    3.30
  17   0  -1    0.30    3.60
 -17   0   1   -2.00    3.90
 -17   0   1    1.50    4.00
 -17   0   1    1.60    2.90
  16   0  -1   -7.10    5.70
 -16   0   1    1.40    3.70
 -16   0   1    8.20    4.70
 -16   0   1    0.40    3.60
 -16   0   1    1.30    4.30
  15   0  -1   -5.20    3.40
  15   0  -1   -2.50    6.40
 -15   0   1  -10.10    3.80
 -15   0   1   -0.50    4.00
 -15   0   1   -2.80    5.10
 -15   0   1    1.60    4.30
  14   0  -1   43.30    4.90
  14   0  -1   59.49    8.90
 -14   0   1   42.00    5.80
 -14   0   1   39.20    6.40
 -14   0   1   45.10    6.10
 -14   0   1   44.10    6.60
  13   0  -1    1.70    6.20
 -13   0   1   -1.90    3.40
 -13   0   1    7.30    8.70
 -13   0   1    3.70    3.50
 -13   0   1    1.20    4.10
 -13   0   1   -1.40    4.90
  12   0  -1   32.80    5.50
 -12   0   1   25.70    4.20
 -12   0   1   18.00    4.80
 -12   0   1   29.70    4.00
 -12   0   1   27.10    8.90
 -12   0   1   28.70    4.30
 -12   0   1   36.40    4.10
 -11   0   1    7.40    6.70
 -11   0   1    2.20    2.90
 -11   0   1    2.50    3.10
 -11   0   1    3.10    2.80
 -11   0   1    0.60    3.00
 -11   0   1   -0.60    3.60
 -10   0   1   87.09    6.40
 -10   0   1   89.09   10.10
 -10   0   1   87.09    5.50
 -10   0   1   93.29    5.60
 -10   0   1   97.99    7.30
 -10   0   1   76.29    5.80
 -10   0   1   86.39    5.70
  -9   0   1  103.09    6.00
  -9   0   1  110.49    9.50
  -9   0   1  115.39    6.90
  -9   0   1   99.69    5.80
  -9   0   1  109.09    6.60
  -9   0   1  101.59    5.90
  -8   0   1   67.29    7.00
  -8   0   1   75.99    5.70
  -7   0   1   58.39    4.60
  -7   0   1   57.89    6.30
  -6   0   1  134.99    8.00
  -6   0   1  114.69    6.30
  -5   0   1  115.49    7.50
  -5   0   1  109.39    5.70
  -4   0   1   10.60    1.80
  -4   0   1    9.20    3.00
  -3   0   1  255.97   12.30
  -3   0   1  272.97   11.70
  -2   0   1    5.40    1.00
  -2   0   1    2.00    1.40
  -1   0   1  934.61   38.80
  -1   0   1  894.11   38.90
   0   0  -1  469.15   20.00
  -1   0  -1  990.50   42.70
  -1   0  -1 1020.80   42.70
  -2   0  -1   52.19    3.20
  -2   0  -1   44.00    3.00
  -3   0  -1   13.90    2.20
  -3   0  -1   14.60    2.50
  -4   0  -1  732.53   31.90
  -4   0  -1  738.23   32.30
  -5   0  -1   80.69    5.30
  -5   0  -1   84.59    6.00
  -6   0  -1  106.09    6.30
  -6   0  -1  110.19    7.40
  -7   0  -1    8.30    2.80
  -7   0  -1   11.60    4.00
  -8   0  -1    3.50    4.30
   8   0   1    6.20    3.10
  -9   0  -1  123.09    6.30
  -9   0  -1  112.89    6.40
  -9   0  -1  107.09    6.10
  -9   0  -1  118.39    6.90
  -9   0  -1  112.79    9.90
   9   0   1  114.49    7.20
 -10   0  -1   83.59    5.30
 -10   0  -1   78.19    5.80
 -10   0  -1   80.79    6.40
 -10   0  -1   80.69    5.40
 -10   0  -1   81.99    5.30
 -10   0  -1   79.69    9.00
  10   0   1   84.89    7.10
 -11   0  -1    3.50    3.10
 -11   0  -1    0.30    3.00
 -11   0  -1    2.60    3.00
 -11   0  -1   -2.20    3.80
 -11   0  -1    4.30    3.20
 -11   0  -1    0.20    7.20
  11   0   1   -6.80    4.20
  11   0   1   -0.40    2.60
 -12   0  -1   16.50    4.70
 -12   0  -1   10.70    8.80
 -12   0  -1   19.20    3.80
 -12   0  -1   14.70    3.50
 -12   0  -1   10.30    3.70
 -12   0  -1   14.90    3.40
  12   0   1   31.90    5.80
  12   0   1   15.50    3.10
 -13   0  -1  189.18   11.30
 -13   0  -1  160.88   15.10
 -13   0  -1  192.98    9.90
 -13   0  -1  158.58    9.40
 -13   0  -1  160.38    9.80
 -13   0  -1  165.78    9.60
  13   0   1  172.38    9.10
  13   0   1  172.58   11.70
 -14   0  -1   17.90    4.20
 -14   0  -1   16.90    4.10
 -14   0  -1   13.10    5.80
 -14   0  -1   17.90    4.60
  14   0   1    8.70    3.50
  14   0   1   18.00    6.90
 -15   0  -1    3.30    4.10
 -15   0  -1   -1.70    5.60
 -15   0  -1    1.50    3.90
  15   0   1  -11.90    6.20
 -16   0  -1   -0.30    5.00
 -16   0  -1    7.80    3.50
 -16   0  -1   -1.10    4.10
  16   0   1    0.50    4.00
  16   0   1    3.10    5.80
 -17   0  -1    1.50    3.90
 -17   0  -1    4.10    2.90
 -17   0  -1    0.50    3.60
  17   0   1    0.80    3.30
  17  -1  -1   -6.00    3.50
 -17   1   1   -4.20    3.90
 -17   1   1   -2.60    3.90
 -17   1   1    5.50    3.20
  16  -1  -1   -7.80    5.60
 -16   1   1    2.00    3.60
 -16   1   1    0.90    3.60
 -16   1   1    4.30    4.40
 -16   1   1   -0.50    4.70
  15  -1  -1   39.10    7.00
 -15   1   1   39.40    5.50
 -15   1   1   19.30    5.80
 -15   1   1   41.40    6.00
 -15   1   1   34.00    4.80
  14  -1  -1   14.30    6.40
  14  -1  -1   13.80    4.10
 -14   1   1   11.10    3.90
 -14   1   1   12.90    4.20
 -14   1   1    1.10    5.20
 -14   1   1    6.80    4.20
  13  -1  -1   17.50    6.30
 -13   1   1   15.10    3.90
 -13   1   1    9.50    5.10
 -13   1   1    8.60    4.20
 -13   1   1   12.10    3.90
 -13   1   1    3.50    8.10
  12  -1  -1   47.50    7.80
 -12   1   1   55.79    5.50
 -12   1   1   58.59    6.60
 -12   1   1   56.89    5.00
 -12   1   1   63.89    5.50
 -12   1   1   53.39    4.80
 -12   1   1   44.90    8.90
 -11   1   1    1.50    4.10
 -11   1   1    3.40    2.60
 -11   1   1    2.20    3.40
 -11   1   1    6.10    2.50
 -11   1   1   11.80    7.00
 -11   1   1    3.70    3.00
 -10   1   1  143.59   10.90
 -10   1   1  145.29    7.60
 -10   1   1  138.59    7.30
 -10   1   1  150.38    8.50
 -10   1   1  149.49    7.80
 -10   1   1  129.39    7.80
 -10   1   1  159.98    8.40
 -10   1   1  148.89    7.80
  -9   1   1    5.50    2.50
  -9   1   1    7.00    3.30
  -9   1   1    6.00    3.00
  -9   1   1    9.20    2.40
  -9   1   1    4.50    2.30
  -9   1   1    5.70    4.60
  -8   1   1   83.49    5.70
  -8   1   1   96.29    7.80
  -7   1   1   46.20    4.50
  -7   1   1   50.19    6.50
  -7   1   1   48.00    4.40
  -6   1   1  543.55   23.80
  -6   1   1  527.65   24.60
  -5   1   1  577.24   25.80
  -5   1   1  568.94   25.20
  -4   1   1  894.71   38.80
  -4   1   1  886.91   38.40
  -3   1   1  301.17   13.70
  -3   1   1  294.77   13.30
  -2   1   1   10.80    2.00
  -2   1   1   11.30    2.00
  -1   1   1 2075.89   87.79
  -1   1   1 2068.59   87.69
   0   1   1   44.50    2.50
  -1  -1  -1   33.90    2.00
  -1  -1  -1   31.70    2.00
  -2  -1  -1   72.29    4.10
  -2  -1  -1   63.69    3.60
  -3  -1  -1 3369.66  142.29
  -3  -1  -1 3336.27  141.89
  -4  -1  -1 1513.65   63.49
  -4  -1  -1 1437.56   62.89
  -5  -1  -1   43.20    3.60
  -5  -1  -1   44.80    5.20
  -6  -1  -1   74.19    4.90
  -6  -1  -1   78.99    6.30
  -7  -1  -1    9.70    3.90
  -8  -1  -1  262.57   14.20
   8   1   1  258.87   12.50
  -9  -1  -1   14.80    3.70
  -9  -1  -1   10.50    2.50
  -9  -1  -1    7.50    2.20
  -9  -1  -1   10.30    2.60
  -9  -1  -1   12.20    5.70
  -9  -1  -1    9.30    2.50
   9   1   1   13.20    3.70
 -10  -1  -1   16.20    3.70
 -10  -1  -1   19.00    6.40
 -10  -1  -1   17.50    3.00
 -10  -1  -1   19.40    3.20
 -10  -1  -1   14.70    2.70
 -10  -1  -1   14.50    2.70
  10   1   1   16.80    4.40
 -11  -1  -1   -4.30    3.00
 -11  -1  -1    4.40    7.00
 -11  -1  -1    0.80    3.10
 -11  -1  -1   -1.00    2.70
 -11  -1  -1   -4.90    3.80
 -11  -1  -1   -1.70    3.00
  11   1   1   -1.60    3.10
  11   1   1   -1.80    4.40
 -12  -1  -1    4.00    4.80
 -12  -1  -1    0.30    3.30
 -12  -1  -1   11.60    8.30
 -12  -1  -1    5.40    3.60
 -12  -1  -1    4.90    3.60
 -12  -1  -1    2.20    4.10
  12   1   1    4.10    3.30
  12   1   1   14.50    5.10
 -13  -1  -1   51.39   10.40
 -13  -1  -1   44.20    6.00
 -13  -1  -1   46.40    6.50
 -13  -1  -1   39.70    7.10
 -13  -1  -1   48.90    5.70
  13   1   1   49.00    5.20
  13   1   1   46.10    6.70
 -14  -1  -1    8.80    4.00
 -14  -1  -1    1.30    5.60
 -14  -1  -1    4.30    4.10
 -14  -1  -1    5.50    3.70
  14   1   1    3.70    6.80
  14   1   1    2.00    3.40
 -15  -1  -1    1.60    4.00
 -15  -1  -1   -8.10    5.40
 -15  -1  -1   -0.20    3.70
  15   1   1   -0.40    6.60
  15   1   1   -0.10    3.30
 -16  -1  -1   -5.40    4.00
 -16  -1  -1   -0.20    5.10
 -16  -1  -1    2.80    3.30
  16   1   1   -1.30    5.70
  16   1   1    3.50    3.90
 -17  -1  -1   -3.80    3.30
 -17  -1  -1    2.20    3.70
 -17  -1  -1   -0.10    2.70
  17   1   1    4.40    3.30
  17  -2  -1   10.20    3.70
 -17   2   1   14.50    4.30
 -17   2   1   15.70    4.00
 -17   2   1   16.20    3.50
 -16   2   1   29.60    5.60
 -16   2   1   35.70    5.70
 -16   2   1   23.80    4.10
  15  -2  -1   21.90    6.30
 -15   2   1    7.60    4.60
 -15   2   1    4.10    4.80
 -15   2   1   10.10    4.00
 -15   2   1   17.20    4.30
  14  -2  -1    6.50    5.90
 -14   2   1   -3.00    4.90
 -14   2   1    0.10    3.90
 -14   2   1   -4.10    4.00
 -14   2   1    1.10    3.90
  13  -2  -1  165.38   11.30
 -13   2   1  177.48    9.50
 -13   2   1  177.38    9.30
 -13   2   1  155.38   14.70
 -13   2   1  167.48    9.50
 -13   2   1  168.18   10.40
  12  -2  -1   13.10    5.30
 -12   2   1    3.10    4.90
 -12   2   1   10.30    4.70
 -12   2   1    4.00    7.20
 -12   2   1   13.30    3.20
 -12   2   1    5.90    3.70
 -12   2   1    7.50    3.00
 -11   2   1   18.50    4.80
 -11   2   1   24.00    3.50
 -11   2   1   19.90    7.50
 -11   2   1   24.00    3.30
 -11   2   1   23.60    3.10
 -11   2   1   22.50    3.40
 -11   2   1   23.00    3.20
 -10   2   1   69.09    5.30
 -10   2   1   72.29    8.50
 -10   2   1   68.49    5.20
 -10   2   1   69.99    4.80
 -10   2   1   86.89    6.60
 -10   2   1   74.89    4.80
 -10   2   1   70.29    5.50
 -10   2   1   77.69    6.40
  -9   2   1   78.69    6.20
  -9   2   1   83.09    5.10
  -9   2   1   94.99    6.10
  -9   2   1   91.59    8.30
  -9   2   1   93.99    5.50
  -9   2   1   91.89    5.30
  -8   2   1    6.30    3.10
  -8   2   1    0.10    2.70
  -8   2   1    0.90    3.80
  -7   2   1    6.00    3.90
  -7   2   1    6.90    2.60
  -7   2   1    5.40    3.10
  -6   2   1   12.60    3.70
  -6   2   1   11.80    3.00
  -5   2   1    0.60    2.80
  -5   2   1    3.70    2.60
  -4   2   1 1572.34   66.19
  -4   2   1 1507.55   65.89
  -3   2   1  259.87   12.80
  -3   2   1  292.27   12.80
  -2   2   1 2710.43  115.19
  -2   2   1 2719.13  115.09
   1  -2  -1  735.63   31.70
  -1   2   1  747.03   31.90
   0   2   1  254.27   11.40
  -1  -2  -1  185.78    8.40
  -2  -2  -1   17.10    2.00
  -2  -2  -1   12.70    2.20
  -3  -2  -1 9999.00  418.06
  -3  -2  -1 9805.72  418.46
  -4  -2  -1  298.87   13.60
  -4  -2  -1  306.17   14.30
  -5  -2  -1    9.80    2.00
  -5  -2  -1   10.60    3.10
  -6  -2  -1    2.10    1.90
  -6  -2  -1   -2.00    3.10
  -7  -2  -1 1277.47   56.29
   7   2   1 1278.97   54.89
  -8  -2  -1  269.47   14.70
  -8  -2  -1  256.77   12.10
   8   2   1  257.37   12.60
  -9  -2  -1  192.58   12.20
  -9  -2  -1  184.18    9.50
  -9  -2  -1  192.08    9.40
  -9  -2  -1  191.88    9.40
  -9  -2  -1  192.08    9.30
  -9  -2  -1  195.68    9.30
  -9  -2  -1  199.48   10.00
   9   2   1  201.98   10.40
 -10  -2  -1    6.90    2.80
 -10  -2  -1    8.10    2.80
 -10  -2  -1    5.80    2.50
 -10  -2  -1   13.60    4.10
 -10  -2  -1    9.60    5.90
 -10  -2  -1    7.90    2.80
  10   2   1   10.90    4.50
 -11  -2  -1   91.79    6.70
 -11  -2  -1   98.79    6.60
 -11  -2  -1  104.39    6.90
 -11  -2  -1   94.09    6.30
 -11  -2  -1   96.99    7.20
 -11  -2  -1   92.09   11.10
  11   2   1   93.89    8.00
  11   2   1   99.79    5.90
 -12  -2  -1    2.90    3.60
 -12  -2  -1    3.10    3.70
 -12  -2  -1    1.20    4.40
 -12  -2  -1   -6.60    8.00
 -12  -2  -1    1.10    3.80
  12   2   1    0.10    5.50
  12   2   1   -0.20    3.10
 -13  -2  -1   25.80    5.80
 -13  -2  -1   30.10    4.80
 -13  -2  -1   31.70    4.70
 -13  -2  -1   23.10    5.00
  13   2   1   29.00    4.40
  13   2   1   29.10    6.80
 -14  -2  -1   21.80    5.80
 -14  -2  -1   20.60    4.50
 -14  -2  -1   11.40    4.00
 -14  -2  -1   24.10    4.60
  14   2   1   24.50    4.00
  14   2   1   22.20    7.30
 -15  -2  -1   13.60    4.20
 -15  -2  -1   -6.40    5.40
 -15  -2  -1   -2.80    3.70
  15   2   1    0.00    3.40
  15   2   1    2.30    6.90
 -16  -2  -1    4.00    3.80
 -16  -2  -1  -10.30    4.50
 -16  -2  -1   -2.60    3.10
  16   2   1    5.40    6.10
  16   2   1   -3.40    4.00
  16   2   1    2.90    2.80
  17  -3  -1    8.30    3.60
 -17   3   1   10.10    3.90
 -17   3   1   13.90    3.90
 -17   3   1    9.60    3.50
 -16   3   1    0.80    3.80
 -16   3   1    1.00    4.80
 -16   3   1    3.10    4.20
 -15   3   1   -2.40    3.70
 -15   3   1   -2.00    5.10
 -15   3   1   -0.20    4.50
 -15   3   1   -0.60    3.70
 -14   3   1   34.30    4.60
 -14   3   1   39.20    6.70
 -14   3   1   29.30    4.70
 -14   3   1   33.10    4.70
  13  -3  -1    2.90    5.30
 -13   3   1   14.80    5.00
 -13   3   1    2.10    8.20
 -13   3   1    4.20    3.70
 -13   3   1    7.70    5.30
 -13   3   1   10.40    4.30
 -13   3   1    8.90    3.60
  12  -3  -1   20.00    5.20
 -12   3   1   23.60    3.70
 -12   3   1   19.10    3.40
 -12   3   1   20.70    3.40
 -12   3   1   20.40    3.80
 -12   3   1   20.70    4.60
 -12   3   1   23.50    7.40
 -11   3   1   53.09    5.40
 -11   3   1   63.49    5.00
 -11   3   1   51.49    8.90
 -11   3   1   54.99    5.00
 -11   3   1   56.39    4.80
 -11   3   1   60.79    6.90
 -10   3   1   28.80    4.50
 -10   3   1   32.40    3.70
 -10   3   1   28.90    5.00
 -10   3   1   32.00    5.10
 -10   3   1   32.60    4.00
 -10   3   1   42.90    7.90
 -10   3   1   32.10    4.00
  -9   3   1   14.80    5.00
  -9   3   1   15.70    2.80
  -9   3   1   16.60    3.50
  -9   3   1   14.20    3.10
  -9   3   1   12.50    2.70
  -8   3   1   14.70    3.90
  -8   3   1   15.80    4.70
  -8   3   1    8.50    2.40
  -7   3   1  126.19    8.20
  -7   3   1  141.49    9.10
  -6   3   1   50.29    5.70
  -6   3   1   59.89    5.40
  -5   3   1   57.19    5.30
  -5   3   1   53.59    5.20
  -4   3   1    2.00    3.00
  -4   3   1    4.30    2.70
  -3   3   1 1304.67   55.49
  -3   3   1 1279.77   55.59
  -2   3   1  814.32   35.40
   1  -3  -1  358.16   16.00
  -1   3   1  367.06   16.30
   0  -3  -1  724.53   31.10
   0   3   1  724.43   31.40
  -1  -3  -1 1739.73   71.99
   1   3   1 1645.64   72.09
  -2  -3  -1  689.83   30.40
  -2  -3  -1  712.83   30.20
  -3  -3  -1   -0.70    1.80
  -3  -3  -1    1.90    2.40
  -4  -3  -1   45.50    4.90
  -4  -3  -1   50.99    3.50
  -5  -3  -1  765.32   34.00
  -5  -3  -1  757.32   35.00
   5   3   1  839.92   34.30
  -6  -3  -1  194.78   10.40
   6   3   1  161.78    8.80
  -7  -3  -1   42.80    6.00
   7   3   1   40.70    4.50
  -8  -3  -1   46.90    3.60
  -8  -3  -1   45.40    3.90
  -8  -3  -1   49.99    4.80
  -8  -3  -1   38.00    6.50
  -8  -3  -1   43.20    4.00
   8   3   1   38.10    5.40
  -9  -3  -1   47.50    4.10
  -9  -3  -1   46.90    4.20
  -9  -3  -1   51.69    4.60
  -9  -3  -1   38.20    5.10
  -9  -3  -1   44.60    8.00
  -9  -3  -1   36.30    3.90
   9   3   1   46.50    6.30
 -10  -3  -1  212.58   10.70
 -10  -3  -1  212.28   10.80
 -10  -3  -1  205.98   14.10
 -10  -3  -1  217.38   10.70
 -10  -3  -1  222.18   11.20
 -10  -3  -1  211.58   10.60
  10   3   1  225.08   12.30
  10   3   1  227.48   10.50
 -11  -3  -1    8.30    3.20
 -11  -3  -1    7.90    3.40
 -11  -3  -1    5.30    3.20
 -11  -3  -1   13.40    7.10
 -11  -3  -1   15.20    4.80
  11   3   1    9.10    3.10
  11   3   1    3.20    4.60
 -12  -3  -1    7.40    4.00
 -12  -3  -1    6.30    7.00
 -12  -3  -1    3.00    4.20
 -12  -3  -1   -0.60    3.50
 -12  -3  -1   -0.50    4.90
  12   3   1    2.40    3.30
  12   3   1   -1.20    5.40
 -13  -3  -1   70.89    7.00
 -13  -3  -1   66.49    6.50
 -13  -3  -1   73.29    8.40
 -13  -3  -1   66.99    6.80
  13   3   1   67.19    5.50
  13   3   1   70.79    9.50
 -14  -3  -1    4.90    3.80
 -14  -3  -1   11.30    5.80
 -14  -3  -1    0.20    4.40
 -14  -3  -1    7.60    4.00
  14   3   1    2.10    3.60
  14   3   1    1.30    6.90
 -15  -3  -1    3.00    5.20
 -15  -3  -1   -1.80    3.30
 -15  -3  -1   -0.20    4.20
  15   3   1    3.20    3.40
  15   3   1    8.80    6.80
 -16  -3  -1    0.20    2.90
 -16  -3  -1   -0.90    3.70
 -16  -3  -1    1.40    4.50
  16   3   1    2.30    2.90
  16   3   1   -1.30    3.80
  16   3   1   -1.60    8.20
  17  -4  -1    8.60    3.50
 -17   4   1    8.40    4.10
 -17   4   1    8.60    4.00
 -17   4   1   12.50    3.40
 -16   4   1   23.90    4.00
 -16   4   1   12.80    4.60
 -16   4   1   36.70    5.60
 -15   4   1   -0.30    4.40
 -15   4   1    6.60    3.90
 -15   4   1    4.00    3.70
 -15   4   1    5.90    5.20
 -14   4   1    4.10    3.90
 -14   4   1    3.40    5.00
 -14   4   1    8.40    3.70
 -14   4   1    4.20    4.20
 -13   4   1  243.78   11.80
 -13   4   1  224.68   11.70
 -13   4   1  229.08   11.80
 -13   4   1  224.48   11.60
 -13   4   1  228.78   12.50
 -12   4   1   40.90    8.90
 -12   4   1   25.20    4.80
 -12   4   1   39.90    5.40
 -12   4   1   34.00    4.90
 -12   4   1   36.30    4.50
 -12   4   1   34.90    4.70
 -11   4   1   23.20    3.70
 -11   4   1   19.90    3.40
 -11   4   1   14.70    2.50
 -11   4   1   13.80    4.40
 -11   4   1   16.40    7.00
 -11   4   1   13.60    2.80
 -10   4   1  143.29    7.60
 -10   4   1  130.39    7.10
 -10   4   1  141.89    7.50
 -10   4   1  145.39   10.90
 -10   4   1  141.19    7.60
 -10   4   1  155.18    8.30
  -9   4   1   31.60    4.40
  -9   4   1   20.50    2.80
  -9   4   1   19.10    4.50
  -9   4   1   24.90    4.50
  -9   4   1   27.80    4.00
  -9   4   1   21.90    3.00
  -9   4   1   18.70    5.10
  -8   4   1   -1.10    4.00
  -8   4   1    3.50    2.50
  -8   4   1   13.30    4.30
  -7   4   1  140.59    9.50
  -7   4   1  150.38    9.40
  -6   4   1    2.60    3.20
  -6   4   1   -0.80    3.30
  -5   4   1   97.49    6.50
  -5   4   1   87.59    6.50
  -4   4   1   13.40    3.10
  -4   4   1   14.20    3.30
   3  -4  -1   71.49    5.40
  -3   4   1   85.39    6.20
   2  -4  -1   -1.50    2.00
  -2   4   1    1.50    2.80
   1  -4  -1  893.31   38.90
  -1   4   1  908.81   39.20
   0  -4  -1    9.40    2.20
   0   4   1   15.80    2.80
  -1  -4  -1  353.26   15.70
   1   4   1  346.17   15.80
  -2  -4  -1  542.95   24.00
  -3  -4  -1  333.97   15.10
  -3  -4  -1  337.37   15.60
  -4  -4  -1    1.10    1.80
  -4  -4  -1    1.10    2.50
  -5  -4  -1  199.78   10.60
  -5  -4  -1  196.38    9.30
   5   4   1  197.68    9.50
  -6  -4  -1  502.15   23.20
   6   4   1  480.85   21.80
  -7  -4  -1   11.70    4.70
   7   4   1   14.10    3.00
  -8  -4  -1   47.70    4.20
  -8  -4  -1   45.10    7.60
  -8  -4  -1   46.00    4.20
  -8  -4  -1   54.49    4.20
  -8  -4  -1   47.30    5.50
   8   4   1   46.90    4.10
   8   4   1   46.20    5.80
  -9  -4  -1   86.59    6.50
  -9  -4  -1   87.19    5.60
  -9  -4  -1   91.79    7.80
  -9  -4  -1   76.89    5.60
  -9  -4  -1   81.49    5.50
  -9  -4  -1   71.39    9.20
   9   4   1   82.69    5.20
   9   4   1   74.59    5.20
   9   4   1   95.39    7.00
 -10  -4  -1   53.39    6.00
 -10  -4  -1   61.09    5.40
 -10  -4  -1   56.99    9.40
 -10  -4  -1   57.29    4.70
 -10  -4  -1   57.99    5.10
  10   4   1   72.59    6.90
  10   4   1   62.09    4.60
 -11  -4  -1   17.30    7.20
 -11  -4  -1   11.90    3.30
 -11  -4  -1   13.20    4.40
 -11  -4  -1   12.80    3.50
 -11  -4  -1    8.10    3.00
  11   4   1   20.70    3.70
  11   4   1   24.10    5.60
 -12  -4  -1    6.30    3.90
 -12  -4  -1   12.80    7.00
 -12  -4  -1   -2.10    3.80
 -12  -4  -1   -3.30    3.40
 -12  -4  -1   -0.90    4.90
  12   4   1    4.80    3.50
  12   4   1   -1.10    5.40
 -13  -4  -1   16.20    5.80
 -13  -4  -1   26.30    4.40
 -13  -4  -1   25.30    4.60
 -13  -4  -1   26.60    5.00
  13   4   1   18.50    3.90
  13   4   1   17.70    6.90
 -14  -4  -1   23.80    3.90
 -14  -4  -1   22.10    4.80
 -14  -4  -1   21.40    5.50
  14   4   1   25.20    4.10
  14   4   1   21.80    7.30
 -15  -4  -1    1.70    3.90
 -15  -4  -1    3.60    3.10
 -15  -4  -1    4.50    4.90
  15   4   1    5.60    6.50
  15   4   1    3.20    3.40
  15   4   1    2.80    4.20
 -16  -4  -1    3.80    3.60
 -16  -4  -1    3.70    4.20
 -16  -4  -1    4.90    2.60
  16   4   1    0.10    3.70
  16   4   1    3.50    2.80
 -17   5   1    1.90    3.20
 -17   5   1   -2.60    3.70
 -17   5   1   -5.60    3.80
 -16   5   1    4.40    3.70
 -16   5   1   -7.10    4.30
 -16   5   1    6.30    4.40
 -15   5   1    4.40    3.70
 -15   5   1    3.50    4.90
 -15   5   1    1.80    3.90
 -14   5   1    6.80    3.60
 -14   5   1   -2.20    3.40
 -14   5   1    6.60    5.60
 -14   5   1    8.10    4.40
 -14   5   1    3.70    4.40
  13  -5  -1   99.49   15.20
 -13   5   1   95.89    7.30
 -13   5   1   87.99    6.80
 -13   5   1   77.89    7.40
 -13   5   1   99.09    8.60
 -13   5   1   93.09    6.50
 -12   5   1   61.09    6.20
 -12   5   1   62.89    6.60
 -12   5   1   51.79    5.40
 -12   5   1   60.69    5.20
 -12   5   1   47.70    5.40
 -11   5   1   18.60    3.20
 -11   5   1   15.50    6.80
 -11   5   1   16.20    3.60
 -11   5   1   17.80    3.40
 -11   5   1   16.10    4.10
 -11   5   1   16.50    2.90
 -10   5   1    1.20    2.20
 -10   5   1    1.70    2.10
 -10   5   1   -1.70    3.50
 -10   5   1    1.00    5.30
 -10   5   1    3.10    2.90
 -10   5   1    1.10    2.80
  -9   5   1    3.30    4.40
  -9   5   1   -0.80    2.60
  -9   5   1    4.90    4.40
  -9   5   1    2.00    3.10
  -9   5   1   -1.20    2.00
  -9   5   1    1.80    2.40
  -8   5   1   39.10    6.50
  -8   5   1   39.90    6.40
  -7   5   1  126.39    9.10
  -7   5   1  106.79    8.60
  -6   5   1 1192.48   53.39
  -6   5   1 1237.28   53.49
  -5   5   1    6.20    3.40
   4  -5  -1   89.99    7.10
  -4   5   1   99.89    6.90
   3  -5  -1  115.19    7.60
  -3   5   1  159.98    8.40
   2  -5  -1  159.18    8.30
  -2   5   1  155.58    8.80
   1  -5  -1  284.77   13.30
  -1   5   1  278.57   13.60
   0  -5  -1  490.05   22.10
   0   5   1  505.85   22.50
  -1  -5  -1  171.68    8.70
   1   5   1  174.58    8.90
  -2  -5  -1   25.70    3.80
   2   5   1   32.60    4.00
  -3  -5  -1  314.47   14.80
  -3  -5  -1  340.27   15.50
  -4  -5  -1  201.28   10.00
  -4  -5  -1  219.98   10.90
  -5  -5  -1   -4.00    3.30
   5   5   1   -0.50    2.20
  -6  -5  -1  286.57   15.00
   6   5   1  277.87   13.20
  -7  -5  -1   18.60    5.30
  -7  -5  -1   18.90    3.10
  -7  -5  -1   16.50    2.60
   7   5   1   16.00    3.20
  -8  -5  -1    7.30    4.70
  -8  -5  -1   -2.40    2.20
  -8  -5  -1    0.20    2.40
  -8  -5  -1    2.90    3.10
  -8  -5  -1   -0.50    2.40
   8   5   1    1.00    3.50
   8   5   1   -0.60    2.50
   8   5   1    1.00    2.40
  -9  -5  -1    6.80    3.40
  -9  -5  -1   10.30    2.50
  -9  -5  -1   13.50    2.60
  -9  -5  -1    6.20    5.30
  -9  -5  -1   10.70    3.00
   9   5   1   12.80    2.80
   9   5   1   13.00    2.90
   9   5   1   11.70    4.00
 -10  -5  -1    3.60    3.00
 -10  -5  -1    0.80    2.50
 -10  -5  -1    1.30    3.90
 -10  -5  -1    8.60    6.20
 -10  -5  -1    1.50    3.30
  10   5   1    1.90    4.30
  10   5   1    3.10    2.90
  10   5   1   -4.40    2.70
 -11  -5  -1   21.60    4.90
 -11  -5  -1   22.20    4.00
 -11  -5  -1   17.10    7.90
 -11  -5  -1   22.70    3.40
 -11  -5  -1   22.90    3.90
  11   5   1   14.10    5.00
  11   5   1   18.50    3.70
 -12  -5  -1    1.70    3.90
 -12  -5  -1    2.10    3.80
 -12  -5  -1    2.60    5.10
 -12  -5  -1   -4.00    3.50
  12   5   1    5.20    5.70
  12   5   1   -4.20    3.50
 -13  -5  -1    7.50    4.90
 -13  -5  -1   -3.80    3.40
 -13  -5  -1   -0.10    4.50
 -13  -5  -1   -1.40    3.60
  13   5   1    3.00    3.90
  13   5   1    6.80    6.10
 -14  -5  -1   -1.90    5.20
 -14  -5  -1   -6.10    3.20
 -14  -5  -1   -1.50    4.60
  14   5   1   -2.40    6.20
  14   5   1    0.10    3.60
 -15  -5  -1   30.50    4.40
 -15  -5  -1   26.00    4.50
 -15  -5  -1   24.10    5.10
  15   5   1   17.90    3.70
  15   5   1   31.90    4.70
  15   5   1   27.50    6.50
 -16  -5  -1   -0.60    4.00
 -16  -5  -1    0.70    3.30
  16   5   1    6.40    2.70
  16   5   1    6.30    3.30
 -17   6   1   -0.80    3.70
 -17   6   1   -4.40    3.10
 -17   6   1   -4.20    3.50
 -16   6   1   11.10    4.20
 -16   6   1   11.90    4.50
 -16   6   1   14.40    3.70
 -15   6   1    7.20    4.40
 -15   6   1    6.00    4.50
 -15   6   1    7.50    4.80
 -15   6   1    8.80    3.90
 -14   6   1    6.50    4.10
 -14   6   1   -2.10    3.60
 -14   6   1   -1.90    4.40
 -14   6   1    3.80    4.40
  13  -6  -1   19.90    9.80
 -13   6   1   14.70    4.40
 -13   6   1   13.20    3.30
 -13   6   1   13.00    4.90
 -13   6   1   15.50    4.60
  12  -6  -1    8.30    9.30
 -12   6   1    9.60    3.20
 -12   6   1   14.20    4.20
 -12   6   1    8.50    4.60
 -12   6   1   13.60    3.70
  11  -6  -1   24.70    8.20
 -11   6   1   14.00    4.20
 -11   6   1    6.50    2.60
 -11   6   1   11.70    3.20
 -11   6   1   10.90    3.40
  10  -6  -1  134.19   13.10
 -10   6   1  114.99   10.30
 -10   6   1  124.59    7.40
 -10   6   1  122.29    7.40
 -10   6   1  120.29    7.70
 -10   6   1  121.49    6.90
   9  -6  -1    3.80    5.90
  -9   6   1    8.70    2.70
  -9   6   1    7.10    3.30
  -9   6   1    8.60    2.20
  -9   6   1    6.90    2.60
  -9   6   1    7.00    5.00
  -9   6   1    6.80    2.60
   8  -6  -1   30.60    6.20
  -8   6   1   33.40    6.10
  -8   6   1   24.30    3.60
  -8   6   1   25.40    4.50
  -8   6   1   24.00    3.80
   7  -6  -1   10.40    4.90
  -7   6   1   12.20    4.50
   6  -6  -1  240.68   13.40
  -6   6   1  224.88   12.80
   5  -6  -1   46.60    6.20
  -5   6   1   55.29    6.00
   4  -6  -1   91.49    6.80
  -4   6   1   86.99    7.00
   3  -6  -1   95.19    7.10
  -3   6   1  108.49    7.70
   2  -6  -1   58.69    4.90
  -2   6   1   53.29    5.50
   1  -6  -1  112.79    6.80
  -1   6   1   96.89    7.00
   0  -6  -1  131.69    7.40
   0   6   1  132.59    7.90
  -1  -6  -1    8.80    2.60
   1   6   1    8.50    3.10
  -2  -6  -1  103.29    6.50
   2   6   1   98.69    6.40
  -3  -6  -1  268.87   13.40
  -3  -6  -1  269.37   12.70
  -4  -6  -1   30.60    3.60
  -4  -6  -1   35.90    4.60
   4   6   1   38.40    4.00
  -5  -6  -1   39.00    6.00
   5   6   1   30.60    3.70
  -6  -6  -1   29.50    3.90
  -6  -6  -1   19.00    4.40
   6   6   1   28.40    3.40
   6   6   1   23.30    3.90
  -7  -6  -1   69.69    7.50
  -7  -6  -1   61.99    4.50
  -7  -6  -1   60.39    5.30
  -7  -6  -1   64.99    4.50
   7   6   1   67.99    5.90
   7   6   1   63.29    4.40
   7   6   1   64.59    4.30
  -8  -6  -1   11.30    5.60
  -8  -6  -1   18.80    3.40
  -8  -6  -1   15.60    3.10
  -8  -6  -1   14.00    2.60
   8   6   1   14.10    2.70
   8   6   1   21.00    4.20
   8   6   1   18.20    2.90
  -9  -6  -1    5.90    3.50
  -9  -6  -1    3.90    5.60
  -9  -6  -1    0.10    2.70
  -9  -6  -1    2.50    3.10
   9   6   1    2.00    2.80
   9   6   1   -2.20    3.90
   9   6   1    4.30    2.70
 -10  -6  -1    7.20    3.80
 -10  -6  -1    5.50    4.50
 -10  -6  -1    8.40    3.30
 -10  -6  -1   17.90    6.90
 -10  -6  -1    6.70    3.10
  10   6   1    0.60    3.10
  10   6   1    7.70    4.50
  10   6   1    5.40    3.00
 -11  -6  -1   10.90    3.40
 -11  -6  -1    1.90    4.30
 -11  -6  -1   10.00    4.30
 -11  -6  -1   -1.50    7.70
 -11  -6  -1   11.10    3.60
  11   6   1    5.20    3.60
  11   6   1    1.30    4.70
  11   6   1    1.50    3.60
 -12  -6  -1    9.70    5.20
 -12  -6  -1   21.50    4.00
 -12  -6  -1   16.30    4.10
 -12  -6  -1    8.40    3.70
  12   6   1   25.60    6.40
  12   6   1   17.10    4.40
 -13  -6  -1   41.20    6.20
 -13  -6  -1   38.00    5.30
 -13  -6  -1   48.10    7.20
  13   6   1   34.80    5.20
  13   6   1   42.20    7.20
 -14  -6  -1   11.60    5.20
 -14  -6  -1    7.80    4.40
  14   6   1   10.10    4.20
  14   6   1   16.80    6.60
  14   6   1   11.30    3.90
 -15  -6  -1   10.70    4.10
 -15  -6  -1   10.20    4.70
  15   6   1   12.50    3.30
  15   6   1   13.90    5.70
  15   6   1   17.30    4.00
 -17   7   1    3.90    2.90
 -17   7   1    5.10    3.50
 -17   7   1    0.40    3.70
 -16   7   1   -0.50    3.70
 -16   7   1   -2.10    3.30
 -16   7   1    3.90    4.30
 -15   7   1   17.80    3.70
 -15   7   1   12.70    4.50
 -15   7   1   12.70    5.30
 -15   7   1   15.80    4.60
 -14   7   1   14.60    3.80
 -14   7   1    9.60    4.50
 -14   7   1    9.00    4.50
 -14   7   1   12.10    5.20
 -13   7   1    9.30    4.40
 -13   7   1    3.40    4.40
 -13   7   1    4.90    3.30
 -13   7   1    2.40    4.00
  12  -7  -1   31.80   11.00
 -12   7   1   49.00    6.20
 -12   7   1   43.10    6.50
 -12   7   1   40.70    5.40
 -12   7   1   48.90    5.10
  11  -7  -1   -1.30    8.50
 -11   7   1    4.80    4.00
 -11   7   1    3.80    3.60
 -11   7   1   -1.50    2.70
 -11   7   1    5.30    3.40
  10  -7  -1   22.60    8.00
 -10   7   1   37.60    5.10
 -10   7   1   29.00    4.70
 -10   7   1   21.80    7.10
 -10   7   1   26.70    3.90
 -10   7   1   35.50    4.30
 -10   7   1   35.30    4.30
   9  -7  -1    7.80    6.30
  -9   7   1   -4.50    2.90
  -9   7   1    1.70    5.40
  -9   7   1    0.90    3.30
  -9   7   1    1.00    2.30
  -9   7   1   -2.40    2.20
  -9   7   1   -1.80    2.70
   8  -7  -1   24.90    6.80
  -8   7   1   24.90    3.10
  -8   7   1   34.40    6.50
  -8   7   1   31.70    4.50
  -8   7   1   21.80    3.60
  -8   7   1   27.70    3.50
   7  -7  -1    5.90    4.90
  -7   7   1    9.10    3.00
  -7   7   1    4.40    2.50
  -7   7   1    7.10    5.00
   6  -7  -1   20.60    5.10
  -6   7   1   27.90    5.20
   5  -7  -1    1.20    4.30
  -5   7   1    1.40    3.90
   4  -7  -1  134.29    9.10
  -4   7   1  115.89    6.60
  -4   7   1  133.99    8.70
   3  -7  -1  613.04   27.40
  -3   7   1  586.64   26.00
  -3   7   1  587.64   27.50
   2  -7  -1  637.54   27.40
  -2   7   1  600.74   27.60
  -2   7   1  566.64   26.10
   1  -7  -1   39.10    4.80
  -1   7   1   36.50    5.70
  -1   7   1   27.10    3.30
   0  -7  -1   22.90    4.20
   0   7   1   22.10    3.10
   0   7   1   25.00    4.50
  -1  -7  -1  107.29    7.10
   1   7   1  113.89    7.60
   1   7   1  125.09    6.20
  -2  -7  -1    1.10    2.70
   2   7   1   -1.50    1.80
   2   7   1    1.70    2.90
  -3  -7  -1  359.76   16.60
  -3  -7  -1  321.77   15.80
   3   7   1  344.27   15.40
   3   7   1  326.07   15.10
  -4  -7  -1    9.80    3.60
   4   7   1    3.20    1.90
   4   7   1    5.70    2.20
  -5  -7  -1  123.69    8.60
   5   7   1  114.99    6.60
  -6  -7  -1   34.00    4.50
  -6  -7  -1   40.70    6.20
  -6  -7  -1   49.40    3.90
   6   7   1   48.50    4.10
   6   7   1   44.70    3.50
   6   7   1   40.30    4.50
  -7  -7  -1  380.96   17.00
  -7  -7  -1  362.76   16.30
  -7  -7  -1  354.26   16.40
  -7  -7  -1  349.67   19.20
   7   7   1  371.56   16.20
   7   7   1  361.56   16.40
  -8  -7  -1   -0.90    2.40
  -8  -7  -1   -1.20    5.10
  -8  -7  -1   -0.70    3.50
  -8  -7  -1    2.70    2.80
   8   7   1    0.50    2.40
   8   7   1    1.40    3.70
   8   7   1   -0.50    2.60
  -9  -7  -1   15.10    3.40
  -9  -7  -1   14.20    2.80
  -9  -7  -1   18.50    4.40
  -9  -7  -1   14.20    6.80
   9   7   1   15.20    3.10
   9   7   1   21.90    3.40
   9   7   1   15.80    4.90
 -10  -7  -1    8.20    4.40
 -10  -7  -1   14.30    3.80
 -10  -7  -1   13.50    3.20
 -10  -7  -1   15.40    6.80
  10   7   1   17.10    5.00
  10   7   1   18.50    3.60
  10   7   1   15.70    3.60
 -11  -7  -1   18.20    3.70
 -11  -7  -1   29.30    4.70
 -11  -7  -1   23.00    5.20
  11   7   1   28.00    4.30
  11   7   1   19.00    6.00
  11   7   1   29.50    4.50
 -12  -7  -1   36.90    5.90
 -12  -7  -1   50.59    5.50
  12   7   1   51.79    5.50
  12   7   1   41.40    6.10
  12   7   1   45.20    7.30
 -13  -7  -1    1.50    4.50
 -13  -7  -1    3.30    4.40
  13   7   1    1.20    3.70
  13   7   1    2.20    6.40
  13   7   1    3.20    4.20
 -14  -7  -1   -1.30    4.40
 -14  -7  -1    4.40    4.00
  14   7   1    1.00    3.40
  14   7   1   -2.20    3.80
  14   7   1    5.90    5.90
 -15  -7  -1    2.50    3.70
 -15  -7  -1    2.00    3.90
  15   7   1    1.50    2.80
  15   7   1    6.40    3.30
 -16   8   1    2.80    3.00
 -16   8   1    1.00    3.70
 -16   8   1    0.70    4.30
 -15   8   1   -7.80    3.10
 -15   8   1   -0.30    4.10
 -15   8   1    0.20    4.70
 -15   8   1   -1.30    4.20
 -14   8   1   20.00    4.70
 -14   8   1   19.40    5.00
 -14   8   1   34.30    5.00
 -14   8   1   32.50    5.10
 -13   8   1   -3.30    3.10
 -13   8   1    2.20    3.90
 -13   8   1   -5.70    5.00
 -13   8   1    2.80    4.30
  12  -8  -1   87.59   15.40
 -12   8   1   98.19    6.40
 -12   8   1   85.39    8.30
 -12   8   1  108.19    7.80
 -12   8   1  100.69    6.90
  11  -8  -1   66.79   11.50
 -11   8   1   72.99    6.60
 -11   8   1   70.69    5.20
 -11   8   1   69.59    6.80
 -11   8   1   67.29    5.80
 -11   8   1   64.19    5.80
  10  -8  -1   48.40   10.00
 -10   8   1   45.50    5.90
 -10   8   1   41.50    4.80
 -10   8   1   42.80    4.10
 -10   8   1   49.10    5.00
 -10   8   1   52.19    5.70
 -10   8   1   31.70    8.30
   9  -8  -1    7.40    7.40
  -9   8   1    5.30    2.60
  -9   8   1   -0.70    3.30
  -9   8   1    0.00    3.10
  -9   8   1    4.20    6.40
  -9   8   1   -2.10    3.20
   8  -8  -1  227.98   15.60
  -8   8   1  211.58   10.50
  -8   8   1  236.88   14.60
  -8   8   1  226.38   11.00
  -8   8   1  232.68   10.90
  -8   8   1  241.08   11.40
  -8   8   1  224.08   10.90
   7  -8  -1  150.18   11.90
  -7   8   1  155.18   11.10
  -7   8   1  141.89    7.50
  -7   8   1  145.49    8.30
  -7   8   1  148.19    7.60
  -7   8   1  141.79    7.30
  -7   8   1  123.09    7.40
   6  -8  -1   99.19    9.10
  -6   8   1   91.19    6.20
  -6   8   1   92.19    6.00
  -6   8   1   97.89    5.90
  -6   8   1   96.39    8.40
   5  -8  -1   32.60    6.30
  -5   8   1   29.90    6.00
   4  -8  -1   11.90    4.10
  -4   8   1   17.50    4.40
  -4   8   1    9.00    2.40
   3  -8  -1   49.99    6.90
  -3   8   1   37.00    3.90
  -3   8   1   49.90    6.20
   2  -8  -1   21.70    4.40
  -2   8   1   21.60    3.30
  -2   8   1   13.30    4.80
   1  -8  -1  156.08    9.40
  -1   8   1  162.98    8.00
  -1   8   1  149.09    9.70
   0  -8  -1   68.89    6.10
   0   8   1   80.09    5.00
   0   8   1   76.89    6.70
  -1  -8  -1  226.68   12.00
   1   8   1  244.78   12.30
   1   8   1  210.68   10.80
  -2  -8  -1  456.75   21.80
   2   8   1  471.45   20.70
   2   8   1  472.55   22.00
  -3  -8  -1  317.57   15.50
  -3  -8  -1  271.97   14.60
   3   8   1  312.37   13.90
   3   8   1  313.37   13.90
  -4  -8  -1   62.99    6.50
  -4  -8  -1   52.79    4.70
   4   8   1   52.99    4.30
   4   8   1   50.89    3.80
   4   8   1   52.39    4.60
  -5  -8  -1   22.50    3.30
  -5  -8  -1   22.80    3.70
  -5  -8  -1   17.40    4.40
   5   8   1   24.80    2.90
   5   8   1   21.70    2.60
   5   8   1   28.80    4.40
  -6  -8  -1   17.10    3.30
  -6  -8  -1   22.90    5.40
  -6  -8  -1   25.10    3.50
   6   8   1   18.00    3.20
   6   8   1   21.90    3.40
   6   8   1   20.90    3.10
  -7  -8  -1    2.70    3.50
  -7  -8  -1    6.50    5.20
  -7  -8  -1   -1.60    2.60
   7   8   1   -0.80    2.30
   7   8   1   -0.50    2.30
   7   8   1    1.50    3.50
  -8  -8  -1   18.50    6.30
  -8  -8  -1   18.10    3.30
  -8  -8  -1   17.30    2.80
  -8  -8  -1   19.50    4.30
   8   8   1   17.10    3.00
   8   8   1   17.60    4.00
   8   8   1   19.30    3.10
  -9  -8  -1   13.40    3.50
  -9  -8  -1   16.80    4.60
  -9  -8  -1    9.90    2.90
   9   8   1   18.00    3.40
   9   8   1   21.30    5.20
   9   8   1   23.80    3.60
 -10  -8  -1   -1.80    4.10
 -10  -8  -1    2.10    3.10
 -10  -8  -1   -3.90    4.20
  10   8   1   -2.90    3.20
  10   8   1   -9.00    5.30
  10   8   1    2.70    3.60
 -11  -8  -1   27.00    5.10
 -11  -8  -1   39.40    5.40
  11   8   1   45.10    7.10
  11   8   1   39.70    5.30
  11   8   1   32.80    5.40
 -12  -8  -1   19.90    5.20
 -12  -8  -1   16.50    4.60
  12   8   1   14.40    3.80
  12   8   1   20.80    4.30
  12   8   1   27.90    6.90
  12   8   1   17.10    4.30
 -13  -8  -1    5.60    4.10
 -13  -8  -1   10.80    4.90
  13   8   1    7.40    4.00
  13   8   1   10.70    6.60
  13   8   1    7.20    3.80
 -14  -8  -1    3.30    3.90
 -14  -8  -1   -0.20    4.30
  14   8   1   13.40    5.70
  14   8   1    6.40    3.40
  14   8   1    3.40    3.30
 -16   9   1   -0.50    3.40
 -16   9   1    1.60    3.80
 -16   9   1    5.60    3.90
 -15   9   1    1.10    4.00
 -15   9   1    2.80    3.90
 -15   9   1    4.00    4.60
 -14   9   1    9.70    5.20
 -14   9   1   -0.60    4.50
 -14   9   1    5.80    4.30
 -13   9   1   63.39    6.20
 -13   9   1   50.29    7.60
 -13   9   1   54.99    7.60
 -12   9   1   31.80    5.10
 -12   9   1   42.70    7.20
 -12   9   1   35.70    5.70
 -12   9   1   34.30    4.90
  11  -9  -1    7.10    9.10
 -11   9   1   -0.20    3.70
 -11   9   1    7.20    4.40
 -11   9   1    8.20    3.70
 -11   9   1   10.30    4.20
  10  -9  -1   -4.20    7.70
 -10   9   1    5.30    3.40
 -10   9   1    7.20    4.50
 -10   9   1    7.60    3.60
 -10   9   1    9.70    3.30
 -10   9   1    0.00    7.40
   9  -9  -1   32.50    9.20
  -9   9   1   33.80    4.30
  -9   9   1   18.60    7.60
  -9   9   1   29.20    5.30
  -9   9   1   33.80    4.20
  -9   9   1   37.90    4.80
   8  -9  -1    2.30    6.00
  -8   9   1   -1.60    3.00
  -8   9   1    3.00    3.40
  -8   9   1   -1.50    6.70
  -8   9   1   -1.10    2.40
  -8   9   1   -0.60    3.10
  -8   9   1    0.50    2.20
   7  -9  -1    4.80    5.70
  -7   9   1    9.50    2.50
  -7   9   1    7.80    2.50
  -7   9   1   11.00    6.30
  -7   9   1    8.50    3.00
  -7   9   1    4.40    3.10
  -7   9   1    8.20    3.30
   6  -9  -1   49.70    8.40
  -6   9   1   41.40    7.00
  -6   9   1   30.40    4.50
  -6   9   1   33.90    3.80
  -6   9   1   31.00    3.80
  -6   9   1   27.50    4.10
  -6   9   1   31.70    3.80
   5  -9  -1  184.48   11.40
  -5   9   1  143.39    7.40
  -5   9   1  141.39    7.60
  -5   9   1  143.99   10.30
  -5   9   1  140.99    7.40
  -5   9   1  140.59    7.90
  -5   9   1  145.49    7.20
   4  -9  -1   52.69    7.80
  -4   9   1   44.20    6.80
  -4   9   1   36.80    4.30
   3  -9  -1  106.29    8.70
  -3   9   1  111.19    9.20
  -3   9   1   93.49    6.10
   2  -9  -1   55.89    6.60
  -2   9   1   33.90    4.00
  -2   9   1   44.00    6.40
   1  -9  -1  497.85   23.20
  -1   9   1  510.55   21.80
  -1   9   1  456.65   23.50
   0  -9  -1   55.29    6.20
   0   9   1   60.39    6.30
   0   9   1   50.79    4.30
  -1  -9  -1  704.83   31.60
   1   9   1  699.93   31.80
   1   9   1  679.33   30.30
  -2  -9  -1  124.89    8.40
   2   9   1  125.39    7.00
   2   9   1  113.79    8.20
  -3  -9  -1   18.80    2.60
  -3  -9  -1   13.60    4.20
  -3  -9  -1   19.40    3.10
   3   9   1   17.60    3.00
   3   9   1   20.00    2.40
   3   9   1   15.90    2.70
  -4  -9  -1  117.39    6.30
  -4  -9  -1  111.29    6.80
   4   9   1  111.59    6.70
   4   9   1  108.89    5.90
   4   9   1  117.09    6.10
   4   9   1  109.29    5.80
   4   9   1  111.59    6.70
  -5  -9  -1    0.60    3.00
  -5  -9  -1    2.00    4.20
  -5  -9  -1   -1.90    2.60
  -5  -9  -1    0.90    2.30
   5   9   1    2.30    2.30
   5   9   1    0.30    2.00
   5   9   1    3.70    2.40
   5   9   1    0.80    2.80
  -6  -9  -1    2.40    3.10
  -6  -9  -1   -6.80    4.60
  -6  -9  -1    3.80    2.70
   6   9   1   -0.60    2.00
   6   9   1    0.40    2.30
   6   9   1    0.30    3.50
   6   9   1    2.20    2.70
  -7  -9  -1  134.09    8.30
  -7  -9  -1  140.49    7.70
   7   9   1  130.69    9.10
   7   9   1  141.99    7.80
   7   9   1  144.99    7.30
  -8  -9  -1    2.40    3.40
  -8  -9  -1    3.20    3.80
   8   9   1    6.60    3.40
   8   9   1    3.90    2.90
   8   9   1    4.50    4.40
  -9  -9  -1    6.50    3.70
  -9  -9  -1   -0.30    4.00
   9   9   1    1.00    4.80
   9   9   1   -0.90    3.10
   9   9   1    8.10    3.40
 -10  -9  -1   -4.30    4.70
 -10  -9  -1   -1.10    3.80
  10   9   1   -1.80    3.60
  10   9   1   -3.50    5.70
  10   9   1   -1.10    3.80
 -11  -9  -1    2.70    4.40
 -11  -9  -1    1.70    5.00
  11   9   1    0.90    4.00
  11   9   1    2.30    6.10
  11   9   1    3.40    4.00
  11   9   1   -1.40    3.60
 -12  -9  -1  112.89    8.70
  12   9   1  138.49   10.50
  12   9   1  120.19    7.50
  12   9   1  132.59    7.70
  12   9   1   99.09    8.10
 -13  -9  -1   -0.10    4.40
 -13  -9  -1    3.60    3.90
  13   9   1    1.40    5.50
  13   9   1    1.70    3.10
 -14  -9  -1   14.60    4.00
 -14  -9  -1   25.60    3.90
  14   9   1   12.80    2.90
 -16  10   1   16.00    3.80
 -16  10   1   16.40    3.70
 -16  10   1   14.60    3.50
 -15  10   1    1.90    4.00
 -15  10   1    5.20    4.30
 -15  10   1    8.60    4.00
 -14  10   1   13.50    4.50
 -14  10   1   10.90    4.50
 -14  10   1   14.60    5.20
 -13  10   1    3.30    4.40
 -13  10   1    5.10    5.10
 -13  10   1    7.10    4.60
 -12  10   1    1.30    5.20
 -12  10   1   -5.20    4.30
 -12  10   1    0.60    4.60
 -12  10   1    1.40    4.20
  11 -10  -1   -3.60    9.30
 -11  10   1    6.40    4.00
 -11  10   1    6.10    5.10
 -11  10   1   -0.60    4.30
 -11  10   1    3.20    4.20
  10 -10  -1    2.20    8.60
 -10  10   1   -0.20    8.00
 -10  10   1    2.20    3.60
 -10  10   1    3.20    4.70
 -10  10   1    5.10    4.10
 -10  10   1    4.90    3.50
   9 -10  -1   11.60    7.80
  -9  10   1    1.90    3.20
  -9  10   1    8.40    3.40
  -9  10   1    3.90    3.80
  -9  10   1    1.60    2.60
  -9  10   1   -4.00    7.50
  -9  10   1    0.60    3.80
   8 -10  -1  169.88   13.70
  -8  10   1  184.08    8.90
  -8  10   1  172.98   14.30
  -8  10   1  182.68    9.10
  -8  10   1  182.58    9.30
  -8  10   1  178.48    9.90
  -8  10   1  181.68    9.50
   7 -10  -1  148.39   12.70
  -7  10   1  134.19    7.50
  -7  10   1  135.59    7.20
  -7  10   1  137.99    7.60
  -7  10   1  129.59    7.70
  -7  10   1  127.69   12.30
  -7  10   1  149.79    8.60
   6 -10  -1   48.80    9.00
  -6  10   1   36.40    7.10
  -6  10   1   35.90    4.80
  -6  10   1   35.20    4.40
  -6  10   1   35.30    3.60
  -6  10   1   34.30    4.20
  -6  10   1   26.20    2.90
  -6  10   1   31.80    3.80
   5 -10  -1    9.20    5.70
  -5  10   1    2.20    2.00
  -5  10   1    3.00    2.90
  -5  10   1    7.30    2.90
  -5  10   1   -1.10    5.60
  -5  10   1    7.00    2.60
  -5  10   1    5.40    3.10
  -5  10   1    5.40    2.10
   4 -10  -1   26.10    5.80
  -4  10   1   19.00    3.40
  -4  10   1   27.20    6.60
  -4  10   1   23.70    3.10
  -4  10   1   27.30    4.40
  -4  10   1   20.20    2.60
  -4  10   1   22.80    3.10
  -4  10   1   23.40    2.90
  -4  10   1   25.90    3.30
   3 -10  -1  159.18   10.70
  -3  10   1  151.38    8.00
  -3  10   1  157.08    8.50
  -3  10   1  144.69    7.30
  -3  10   1  147.59    7.20
  -3  10   1  140.39    7.30
  -3  10   1  141.59   10.50
  -3  10   1  138.89    7.40
  -3  10   1  141.09    7.70
   2 -10  -1   26.30    5.00
  -2  10   1   21.80    3.00
  -2  10   1   22.10    4.00
  -2  10   1   28.30    3.20
  -2  10   1   23.50    3.30
  -2  10   1   39.90    6.60
  -2  10   1   26.40    4.20
  -2  10   1   29.80    3.30
   1 -10  -1   10.20    4.00
   1 -10  -1    4.10    4.20
  -1  10   1   11.00    2.70
  -1  10   1   10.20    2.80
  -1  10   1    4.90    2.70
  -1  10   1   10.60    5.20
  -1  10   1   10.30    2.10
  -1  10   1    8.50    2.10
   0 -10  -1   98.69    5.70
   0 -10  -1  106.59    8.30
   0  10   1  107.99    5.60
   0  10   1  102.09    5.50
   0  10   1  108.89    8.70
   0  10   1  101.99    6.30
   0  10   1  109.39    6.70
  -1 -10  -1    1.50    3.70
  -1 -10  -1    6.00    2.10
   1  10   1    5.90    2.00
   1  10   1   10.10    2.20
   1  10   1   11.10    2.60
   1  10   1   10.70    2.30
   1  10   1    3.90    2.30
   1  10   1    3.90    4.10
  -2 -10  -1   21.80    3.40
  -2 -10  -1   16.00    2.70
  -2 -10  -1   11.20    3.90
   2  10   1   19.00    2.60
   2  10   1   17.30    2.80
   2  10   1   13.70    2.40
   2  10   1   13.20    2.70
   2  10   1   18.90    2.80
  -3 -10  -1   10.00    3.00
  -3 -10  -1   12.00    2.20
  -3 -10  -1    8.80    4.40
   3  10   1   10.60    2.70
   3  10   1    7.50    2.30
   3  10   1   16.10    2.40
   3  10   1   12.60    2.60
   3  10   1   11.40    2.40
  -4 -10  -1   39.40    3.90
  -4 -10  -1   40.80    4.90
  -4 -10  -1   32.40    3.70
   4  10   1   33.40    4.90
   4  10   1   36.30    3.60
   4  10   1   39.90    3.50
   4  10   1   42.10    4.30
  -5 -10  -1   41.00    4.50
  -5 -10  -1   33.70    5.90
   5  10   1   41.70    3.80
   5  10   1   33.40    3.40
   5  10   1   37.20    5.10
   5  10   1   34.90    4.00
  -6 -10  -1    5.60    3.00
  -6 -10  -1    3.50    3.40
   6  10   1    5.00    2.70
   6  10   1    3.40    3.70
   6  10   1    5.80    2.40
   6  10   1    1.40    2.60
  -7 -10  -1    1.00    3.60
  -7 -10  -1    6.90    3.50
   7  10   1    9.90    4.20
   7  10   1    4.80    3.00
   7  10   1    9.20    3.10
  -8 -10  -1    3.50    4.00
  -8 -10  -1   10.10    3.80
   8  10   1   -1.50    4.60
   8  10   1    6.40    3.30
   8  10   1   -1.60    2.90
  -9 -10  -1   60.79    7.80
  -9 -10  -1   78.19    6.70
   9  10   1   75.09    5.60
   9  10   1   86.69    6.60
   9  10   1   96.79    8.70
 -10 -10  -1   12.00    5.10
 -10 -10  -1    6.80    4.00
  10  10   1   24.60    6.10
  10  10   1    9.40    3.80
  10  10   1   16.90    4.30
 -11 -10  -1   -0.10    4.30
 -11 -10  -1    6.70    4.90
  11  10   1    4.00    3.40
  11  10   1    6.60    6.00
  11  10   1    9.90    4.00
 -12 -10  -1    0.00    4.00
 -12 -10  -1    1.10    4.40
  12  10   1   -2.90    3.20
  12  10   1    5.30    5.70
  12  10   1   -2.30    3.70
 -13 -10  -1    3.90    3.80
 -13 -10  -1    4.10    3.90
  13  10   1    2.80    2.90
  13  10   1    2.10    4.10
 -15  11   1   -0.90    3.80
 -15  11   1    2.60    3.70
 -15  11   1   -2.90    3.90
 -14  11   1    8.50    4.30
 -14  11   1    5.50    4.30
 -14  11   1    3.50    4.60
 -13  11   1   -4.30    4.70
 -13  11   1    2.80    4.40
 -13  11   1    4.50    4.30
 -12  11   1    9.50    4.60
 -12  11   1   -3.10    3.90
 -12  11   1   -1.00    4.50
 -12  11   1   10.40    5.30
 -11  11   1   40.40    6.00
 -11  11   1   44.20    6.00
 -11  11   1   33.00    5.40
 -11  11   1   50.09    6.50
  10 -11  -1   69.09   14.00
 -10  11   1   82.19    7.50
 -10  11   1  101.69    6.70
 -10  11   1   97.49    7.70
 -10  11   1   89.89    7.30
   9 -11  -1    2.90    8.60
  -9  11   1    4.70    3.60
  -9  11   1    3.60    4.70
  -9  11   1    6.80    8.00
  -9  11   1    0.80    3.90
  -9  11   1    1.00    3.50
  -9  11   1    3.70    3.10
   8 -11  -1    6.80    7.70
  -8  11   1    5.30    3.30
  -8  11   1    6.10    3.90
  -8  11   1    6.30    3.70
  -8  11   1    0.50    7.60
  -8  11   1    4.10    2.80
  -8  11   1    5.10    3.50
   7 -11  -1   36.50    8.70
  -7  11   1   29.30    5.30
  -7  11   1   27.50    7.70
  -7  11   1   32.60    4.20
  -7  11   1   32.70    4.10
  -7  11   1   32.50    4.70
  -7  11   1   28.80    4.90
   6 -11  -1   38.20    8.10
  -6  11   1   38.90    4.10
  -6  11   1   36.80    4.60
  -6  11   1   38.40    3.30
  -6  11   1   24.50    8.00
  -6  11   1   32.20    5.40
  -6  11   1   36.50    4.40
  -6  11   1   37.90    5.50
   5 -11  -1  182.58   13.40
  -5  11   1  179.88    9.70
  -5  11   1  179.88    8.90
  -5  11   1  173.08    8.80
  -5  11   1  182.78    9.20
  -5  11   1  191.48    8.90
  -5  11   1  168.78   12.80
  -5  11   1  174.98    9.30
   4 -11  -1   54.69    7.70
  -4  11   1   43.10    8.10
  -4  11   1   62.09    6.00
  -4  11   1   51.19    4.50
  -4  11   1   54.29    4.10
  -4  11   1   41.00    4.80
  -4  11   1   59.09    5.60
  -4  11   1   53.59    4.30
  -4  11   1   55.29    3.90
   3 -11  -1   93.59    9.40
  -3  11   1   97.89    5.70
  -3  11   1   95.19    6.80
  -3  11   1   91.79    5.40
  -3  11   1   87.99    5.80
  -3  11   1   98.39   10.20
  -3  11   1   87.79    6.30
  -3  11   1   98.09    5.40
  -3  11   1   93.49    6.70
   2 -11  -1  101.39    6.10
   2 -11  -1  103.79    8.80
  -2  11   1   97.49    5.50
  -2  11   1  104.39    6.80
  -2  11   1  103.39    6.30
  -2  11   1  104.79    5.70
  -2  11   1   99.39    5.60
  -2  11   1   85.49    5.60
  -2  11   1   93.69    9.20
  -2  11   1  108.79    6.60
   1 -11  -1    1.90    2.70
   1 -11  -1    2.90    4.10
  -1  11   1    7.20    2.30
  -1  11   1    4.00    2.30
  -1  11   1    7.40    2.90
  -1  11   1    5.90    2.80
  -1  11   1    2.50    2.10
  -1  11   1    9.50    4.90
  -1  11   1    6.20    2.00
  -1  11   1    6.80    2.70
   0 -11  -1   24.80    3.40
   0 -11  -1   30.50    6.70
   0  11   1   19.90    3.20
   0  11   1   28.10    4.40
   0  11   1   23.80    3.90
   0  11   1   24.40    3.50
   0  11   1   32.00    5.10
   0  11   1   22.40    3.00
   0  11   1   32.30    5.90
   0  11   1   30.40    3.20
  -1 -11  -1    1.60    2.20
  -1 -11  -1    6.20    3.40
   1  11   1   -1.00    4.30
   1  11   1   -1.50    2.00
   1  11   1    2.90    2.50
   1  11   1    2.30    2.10
   1  11   1    0.20    2.90
   1  11   1    1.60    1.90
  -2 -11  -1    7.60    2.50
  -2 -11  -1    7.90    3.30
   2  11   1   10.30    2.60
   2  11   1    5.40    2.90
   2  11   1   11.70    2.10
   2  11   1   11.80    2.40
   2  11   1    7.30    2.80
  -3 -11  -1   99.39    6.20
  -3 -11  -1  113.39    7.10
   3  11   1  109.79    5.90
   3  11   1  107.09    6.00
   3  11   1  112.99    7.00
   3  11   1   96.69    6.30
  -4 -11  -1   -5.60    3.00
  -4 -11  -1    1.70    3.30
  -4 -11  -1    0.90    2.50
   4  11   1    5.40    3.30
   4  11   1    3.90    2.60
   4  11   1    0.60    2.20
   4  11   1    3.00    2.40
  -5 -11  -1    0.50    2.60
  -5 -11  -1   -0.90    3.60
   5  11   1    3.60    2.70
   5  11   1    1.10    2.60
   5  11   1   -3.40    2.50
  -6 -11  -1    7.20    3.10
  -6 -11  -1    3.40    3.90
   6  11   1   11.20    3.10
   6  11   1    5.70    2.70
   6  11   1    9.20    3.10
  -7 -11  -1   -1.20    3.30
  -7 -11  -1   -1.80    4.00
   7  11   1   -1.60    3.50
   7  11   1    1.30    4.30
   7  11   1    3.00    2.80
  -8 -11  -1   87.79    6.80
  -8 -11  -1   72.59    7.30
   8  11   1   81.09    6.10
   8  11   1   91.69    6.70
   8  11   1   93.99    8.40
  -9 -11  -1    0.70    4.30
  -9 -11  -1    7.60    4.20
   9  11   1    7.30    3.80
   9  11   1    9.10    5.20
   9  11   1    7.10    3.50
 -10 -11  -1    1.40    4.30
 -10 -11  -1    2.80    4.70
  10  11   1    4.00    3.80
  10  11   1    5.60    3.60
  10  11   1    1.60    5.40
 -11 -11  -1   -6.20    4.30
 -11 -11  -1    3.00    4.00
  11  11   1    5.40    3.30
  11  11   1   -4.00    5.50
  11  11   1    4.80    3.90
 -12 -11  -1    5.50    3.80
 -12 -11  -1    8.40    4.00
  12  11   1   19.90    7.20
  12  11   1   12.50    3.30
  12  11   1    8.00    3.60
 -15  12   1   -1.40    3.50
 -15  12   1   -0.60    3.60
 -15  12   1   -6.30    3.40
 -14  12   1    4.90    4.20
 -14  12   1    3.20    4.10
 -14  12   1    1.70    4.40
 -13  12   1   -4.70    4.40
 -13  12   1   -1.10    4.40
 -13  12   1    1.60    4.10
 -13  12   1    5.50    4.70
 -12  12   1   -4.10    4.40
 -12  12   1    3.10    4.50
 -12  12   1   -4.20    5.00
 -12  12   1   -4.10    4.40
 -11  12   1   45.60    7.10
 -11  12   1   48.70    7.50
 -11  12   1   40.90    6.30
 -11  12   1   48.80    6.60
 -10  12   1   84.79    6.00
 -10  12   1   74.39    7.60
 -10  12   1   78.49    7.50
 -10  12   1   76.49    6.60
 -10  12   1   87.29    6.60
   9 -12  -1   38.00   11.40
  -9  12   1   76.89    6.00
  -9  12   1   74.59    6.40
  -9  12   1   82.49    6.80
  -9  12   1   71.89    8.20
  -9  12   1   83.59    7.60
   8 -12  -1   58.89   11.30
  -8  12   1   78.59    6.80
  -8  12   1   80.69    6.60
  -8  12   1   84.49    5.80
  -8  12   1   84.59    6.70
  -8  12   1   61.09   10.80
  -8  12   1   83.79    7.50
   7 -12  -1    3.20    7.80
  -7  12   1    2.00    3.00
  -7  12   1    3.50    4.20
  -7  12   1    3.20    3.90
  -7  12   1    2.10    2.90
  -7  12   1    1.90    7.20
  -7  12   1    5.30    3.90
   6 -12  -1   38.80    8.30
  -6  12   1   61.29    5.70
  -6  12   1   61.59    5.10
  -6  12   1   64.29    6.30
  -6  12   1   46.90    9.50
  -6  12   1   53.69    5.40
  -6  12   1   66.89    5.00
  -6  12   1   63.49    4.60
   5 -12  -1    9.90    6.70
  -5  12   1   11.30    2.60
  -5  12   1    8.40    3.60
  -5  12   1    6.70    7.60
  -5  12   1    9.90    2.70
  -5  12   1   10.60    3.10
  -5  12   1    8.80    3.70
  -5  12   1   14.20    3.20
  -4  12   1   12.60    2.60
  -4  12   1   12.50    3.40
  -4  12   1    7.50    2.90
  -4  12   1   12.40    3.50
  -4  12   1   11.60    2.90
  -4  12   1   19.40    7.50
  -4  12   1   11.00    2.90
  -3  12   1   32.30    5.20
  -3  12   1   42.60    4.40
  -3  12   1   29.50    7.50
  -3  12   1   30.60    3.60
  -3  12   1   32.80    4.60
  -3  12   1   37.50    3.90
  -3  12   1   31.50    3.60
   2 -12  -1   51.39    4.60
  -2  12   1   44.80    5.40
  -2  12   1   45.40    8.80
  -2  12   1   52.79    4.80
  -2  12   1   51.19    5.80
  -2  12   1   40.80    4.20
  -2  12   1   50.99    4.20
  -2  12   1   53.09    4.10
  -2  12   1   57.39    5.50
   1 -12  -1   48.70    4.50
  -1  12   1   64.49    5.80
  -1  12   1   53.29    4.50
  -1  12   1   63.89    4.30
  -1  12   1   66.09    6.10
  -1  12   1   49.20    4.10
  -1  12   1   40.20    8.00
  -1  12   1   54.59    4.70
  -1  12   1   43.40    4.50
   0 -12  -1   22.90    3.60
   0  12   1   24.50    2.90
   0  12   1   19.00    2.90
   0  12   1   22.50    3.60
   0  12   1   21.80    3.50
   0  12   1   20.20    6.10
   0  12   1   22.90    4.00
   0  12   1   20.50    2.80
   0  12   1   21.30    3.00
  -1 -12  -1   -1.00    2.70
  -1 -12  -1    1.90    3.70
   1  12   1    0.20    3.40
   1  12   1    0.00    2.10
   1  12   1   -0.40    2.50
   1  12   1   -1.00    2.60
   1  12   1    5.80    5.40
   1  12   1    2.40    2.80
  -2 -12  -1   -0.40    2.70
  -2 -12  -1    3.30    3.40
   2  12   1    2.00    2.60
   2  12   1    1.00    2.50
   2  12   1   -1.00    2.60
   2  12   1    2.40    3.20
   2  12   1   -2.40    2.30
  -3 -12  -1  152.58    8.80
  -3 -12  -1  135.69    7.60
   3  12   1  143.69    7.70
   3  12   1  153.48    9.50
   3  12   1  149.29    7.60
  -4 -12  -1    2.00    3.80
  -4 -12  -1   -0.20    2.80
  -4 -12  -1   -3.70    4.90
   4  12   1    1.00    3.80
   4  12   1   -0.60    2.70
   4  12   1    0.20    2.70
  -5 -12  -1    4.80    3.00
  -5 -12  -1    1.90    4.10
   5  12   1    6.70    2.90
   5  12   1   10.20    3.30
   5  12   1    7.10    2.80
  -6 -12  -1   59.69    6.50
  -6 -12  -1   49.80    5.20
   6  12   1   55.09    4.80
   6  12   1   50.49    5.60
   6  12   1   60.49    4.70
  -7 -12  -1   11.20    4.00
  -7 -12  -1   11.40    4.80
   7  12   1   15.40    3.50
   7  12   1   12.50    3.90
  -8 -12  -1    3.90    4.90
  -8 -12  -1    3.00    4.10
   8  12   1    4.40    3.10
   8  12   1   -2.20    3.80
  -9 -12  -1    8.90    4.10
  -9 -12  -1    2.00    4.80
   9  12   1    8.40    3.80
   9  12   1    5.40    3.40
 -10 -12  -1    4.00    4.00
 -10 -12  -1    2.30    4.70
  10  12   1    2.90    3.00
  10  12   1    6.60    3.90
 -11 -12  -1    5.20    3.80
 -11 -12  -1    0.50    4.00
  11  12   1    4.90    3.00
  11  12   1    1.80    3.70
 -12 -12  -1    1.20    3.40
 -12 -12  -1   -2.50    3.50
  12  12   1   -1.50    3.00
  12  12   1   -3.60    2.60
 -14  13   1   -3.70    3.90
 -14  13   1   -0.90    3.90
 -14  13   1   -4.90    4.00
 -13  13   1   -1.60    4.50
 -13  13   1    0.80    4.40
 -13  13   1    0.70    4.00
 -13  13   1    2.50    4.10
 -12  13   1    4.50    4.80
 -12  13   1    2.60    4.40
 -12  13   1   -2.80    5.10
 -12  13   1   -3.90    4.30
 -11  13   1    9.90    5.50
 -11  13   1    0.20    4.50
 -11  13   1    3.20    4.50
 -11  13   1    3.10    4.60
 -10  13   1   15.60    5.20
 -10  13   1    8.20    4.70
 -10  13   1   10.30    3.60
 -10  13   1   12.70    4.80
 -10  13   1    8.80    4.60
  -9  13   1   20.00    3.90
  -9  13   1   12.90    4.70
  -9  13   1   11.10    5.50
  -9  13   1   16.90    4.40
  -9  13   1   11.90    4.00
  -8  13   1  472.35   22.70
  -8  13   1  484.25   21.90
  -8  13   1  506.15   22.60
  -8  13   1  509.45   22.50
  -8  13   1  477.35   22.10
  -7  13   1   67.49    6.30
  -7  13   1   53.99    5.90
  -7  13   1   57.69    6.50
  -7  13   1   55.79    6.90
  -7  13   1   66.39    6.00
  -6  13   1   34.60    4.80
  -6  13   1   33.20    4.30
  -6  13   1   29.30    4.90
  -6  13   1   24.40    8.30
  -6  13   1   29.60    4.00
  -6  13   1   31.00    5.00
  -6  13   1   22.10    4.40
  -5  13   1    6.30    4.00
  -5  13   1    3.70    3.20
  -5  13   1    5.10    2.90
  -5  13   1    3.40    3.30
  -5  13   1    4.40    3.00
  -5  13   1    8.00    3.00
  -5  13   1   -2.70    7.70
  -4  13   1   33.10    5.00
  -4  13   1   35.00    5.80
  -4  13   1   35.40    4.00
  -4  13   1   29.00    4.20
  -4  13   1   29.90    8.60
  -4  13   1   29.20    4.80
   3 -13  -1    2.20    3.60
  -3  13   1   -0.30    2.70
  -3  13   1    2.20    2.80
  -3  13   1   -3.20    3.50
  -3  13   1    3.20    2.70
  -3  13   1    1.40    3.00
  -3  13   1    0.10    6.10
   2 -13  -1    1.50    3.30
  -2  13   1   -3.60    2.60
  -2  13   1    4.20    6.10
  -2  13   1   -0.10    2.70
  -2  13   1    2.80    3.50
  -2  13   1    2.60    2.90
  -2  13   1    1.50    3.60
  -2  13   1    1.00    2.60
   1 -13  -1    6.20    2.60
  -1  13   1   -2.20    2.80
  -1  13   1    1.00    2.70
  -1  13   1    1.20    6.00
  -1  13   1   -1.40    2.40
  -1  13   1    2.80    2.60
  -1  13   1    2.10    3.50
  -1  13   1    2.70    2.60
  -1  13   1    4.00    3.50
   0 -13  -1  131.39    7.20
   0  13   1  131.79    7.80
   0  13   1  140.39    7.10
   0  13   1  110.29   11.10
   0  13   1  121.89    8.50
   0  13   1  122.49    7.10
   0  13   1  134.99    7.00
   0  13   1  125.69    7.10
  -1 -13  -1    2.40    3.10
  -1 -13  -1    4.40    3.90
   1  13   1   -0.90    3.60
   1  13   1    0.90    2.70
   1  13   1    2.60    3.00
   1  13   1    4.20    2.80
   1  13   1    1.20    2.70
  -2 -13  -1   21.30    4.50
  -2 -13  -1   24.90    3.50
   2  13   1   22.70    4.90
   2  13   1   28.50    3.70
   2  13   1   27.40    3.70
   2  13   1   20.50    3.00
   2  13   1   14.50    3.00
  -3 -13  -1    7.00    3.20
  -3 -13  -1    6.20    4.50
   3  13   1    6.90    2.90
   3  13   1   14.10    3.20
   3  13   1    3.50    4.30
  -4 -13  -1   -3.70    3.30
  -4 -13  -1   -0.70    4.20
   4  13   1   -2.00    3.30
   4  13   1    2.40    2.90
  -5 -13  -1   -2.40    3.10
  -5 -13  -1    5.30    4.50
   5  13   1    7.90    3.60
   5  13   1    1.70    3.40
  -6 -13  -1   40.90    6.30
  -6 -13  -1   33.70    4.90
   6  13   1   38.70    4.30
   6  13   1   34.30    4.80
   6  13   1   38.30    5.50
  -7 -13  -1   30.60    4.40
  -7 -13  -1   32.80    5.50
   7  13   1   38.10    5.40
   7  13   1   26.20    3.70
  -8 -13  -1   -4.60    4.00
  -8 -13  -1   -2.60    4.60
   8  13   1    0.10    3.60
   8  13   1   -2.30    3.00
  -9 -13  -1    7.40    4.60
  -9 -13  -1    6.90    4.20
   9  13   1    5.50    3.80
   9  13   1    2.70    3.10
 -10 -13  -1    5.70    4.40
 -10 -13  -1    0.70    4.00
  10  13   1    2.10    2.90
  10  13   1    9.00    3.70
 -11 -13  -1   -0.90    3.40
 -11 -13  -1    4.60    3.60
  11  13   1    2.70    2.60
  11  13   1    3.80    3.30
 -13  14   1   -2.70    4.00
 -13  14   1    7.50    4.00
 -13  14   1    1.20    4.10
 -13  14   1   -2.90    3.80
 -12  14   1    0.10    4.60
 -12  14   1    2.40    4.20
 -12  14   1    5.70    4.50
 -12  14   1    2.10    4.00
 -11  14   1    5.10    5.10
 -11  14   1    6.90    4.70
 -11  14   1    5.80    4.30
 -11  14   1   11.10    4.60
 -10  14   1    3.80    4.80
 -10  14   1    9.20    4.60
 -10  14   1    8.80    3.50
 -10  14   1    9.30    4.50
 -10  14   1    8.80    4.50
  -9  14   1    8.50    4.80
  -9  14   1   16.90    4.70
  -9  14   1   21.50    4.80
  -9  14   1    8.90    5.30
  -9  14   1    5.60    3.80
  -8  14   1   -0.10    4.80
  -8  14   1    2.20    3.60
  -8  14   1    0.10    4.20
  -8  14   1   -4.00    4.50
  -8  14   1    3.80    4.00
  -7  14   1  113.59    7.80
  -7  14   1  126.99    9.60
  -7  14   1  133.59    9.00
  -7  14   1  121.49    8.40
  -7  14   1  118.49    7.90
  -6  14   1   16.10    5.00
  -6  14   1   21.00    4.10
  -6  14   1   13.30    4.20
  -6  14   1   18.30    4.40
  -6  14   1   18.50    4.50
  -6  14   1   18.90    3.30
  -5  14   1   35.00    5.20
  -5  14   1   40.40    4.40
  -5  14   1   32.80    5.30
  -5  14   1   52.39    6.40
  -5  14   1   45.00    5.00
   4 -14  -1    5.40    4.20
  -4  14   1    6.30    3.80
  -4  14   1    9.90    4.50
  -4  14   1    3.60    3.10
  -4  14   1    4.10    3.10
  -4  14   1    1.50    3.40
  -4  14   1   11.70    7.60
   3 -14  -1   -3.70    3.40
  -3  14   1    0.10    2.80
  -3  14   1    3.50    4.60
  -3  14   1   -2.50    2.80
  -3  14   1   -2.00    3.00
  -3  14   1    7.00    6.50
  -3  14   1    0.30    3.70
   2 -14  -1    2.60    3.10
  -2  14   1    1.60    2.80
  -2  14   1   -0.20    4.00
  -2  14   1    7.50    7.00
  -2  14   1    1.40    3.00
  -2  14   1    3.70    3.10
  -2  14   1    8.20    3.10
   1 -14  -1   35.00    4.40
  -1  14   1   28.90    4.30
  -1  14   1   37.60    4.70
  -1  14   1   27.00    3.90
  -1  14   1   26.00    4.40
  -1  14   1   28.80    7.90
  -1  14   1   30.00    4.70
   0 -14  -1    2.30    3.40
   0 -14  -1    7.20    4.50
   0  14   1    8.00    4.00
   0  14   1    3.50    3.00
   0  14   1    5.90    4.10
   0  14   1    7.30    3.80
   0  14   1    4.30    3.30
   0  14   1    6.50    3.10
  -1 -14  -1   23.10    5.10
  -1 -14  -1   19.10    3.50
   1  14   1   19.90    3.10
   1  14   1   18.60    4.20
   1  14   1   23.00    3.50
   1  14   1   16.40    3.60
  -2 -14  -1   89.09    7.80
  -2 -14  -1  102.59    6.50
   2  14   1   97.39    6.20
   2  14   1   87.89    6.50
   2  14   1   87.49    7.70
   2  14   1   89.59    6.10
  -3 -14  -1   63.89    7.80
  -3 -14  -1   76.79    6.30
   3  14   1   70.19    6.00
   3  14   1   66.79    5.90
  -4 -14  -1    3.90    3.50
  -4 -14  -1    1.60    4.70
   4  14   1    5.60    3.30
   4  14   1    2.20    3.20
  -5 -14  -1   12.30    3.80
  -5 -14  -1   15.50    5.30
   5  14   1   14.80    4.00
   5  14   1    9.60    3.60
  -6 -14  -1   15.20    4.20
  -6 -14  -1   11.20    4.80
   6  14   1   17.40    4.00
   6  14   1   16.10    3.60
  -7 -14  -1   11.70    4.50
  -7 -14  -1   10.40    4.00
   7  14   1   13.60    3.90
  -8 -14  -1   47.50    6.50
  -8 -14  -1   44.40    5.80
   8  14   1   44.50    5.60
   8  14   1   33.20    4.00
  -9 -14  -1   18.20    4.10
  -9 -14  -1   16.70    4.20
   9  14   1   18.30    2.90
   9  14   1   18.90    3.70
 -10 -14  -1    2.70    3.70
 -10 -14  -1    3.00    3.50
  10  14   1    3.60    2.40
  10  14   1    9.30    3.20
 -13  15   1    8.30    3.60
 -13  15   1    4.10    3.80
 -13  15   1    3.20    3.50
 -12  15   1    1.30    3.90
 -12  15   1    4.20    4.00
 -12  15   1   -2.00    4.20
 -12  15   1    1.80    4.10
 -11  15   1    6.90    4.00
 -11  15   1    3.30    4.60
 -11  15   1    0.90    4.10
 -11  15   1    1.60    4.20
 -10  15   1   10.10    4.40
 -10  15   1   -0.90    4.10
 -10  15   1    4.30    4.40
 -10  15   1    5.70    3.30
 -10  15   1   -0.70    4.10
  -9  15   1   88.39    8.40
  -9  15   1   81.69    6.40
  -9  15   1   68.69    7.00
  -9  15   1   88.49    7.10
  -8  15   1   27.10    5.40
  -8  15   1   35.40    5.20
  -8  15   1   19.00    4.40
  -8  15   1   32.00    4.80
  -8  15   1   23.30    4.20
  -7  15   1   41.90    6.60
  -7  15   1   31.70    4.40
  -7  15   1   33.60    6.20
  -7  15   1   32.30    4.40
   6 -15  -1   12.20    4.90
  -6  15   1   18.60    4.20
  -6  15   1    9.80    4.00
  -6  15   1   13.60    4.10
  -6  15   1   13.10    5.70
  -6  15   1   20.80    3.90
   5 -15  -1   27.50    4.60
  -5  15   1   25.10    3.90
  -5  15   1   23.80    3.90
  -5  15   1   16.60    4.40
  -5  15   1   20.20    5.30
  -5  15   1   27.00    4.40
   4 -15  -1    1.50    4.00
  -4  15   1    3.90    3.70
  -4  15   1   -5.10    4.00
  -4  15   1    1.60    3.50
  -4  15   1    3.40    4.60
  -4  15   1   -1.80    3.50
   3 -15  -1    2.80    3.70
  -3  15   1    4.10    3.50
  -3  15   1    1.40    3.00
  -3  15   1    3.70    3.90
  -3  15   1    2.40    4.60
  -3  15   1    4.30    3.20
   2 -15  -1   10.10    3.70
  -2  15   1    7.90    4.60
  -2  15   1    5.70    4.10
  -2  15   1   11.00    3.60
  -2  15   1    8.70    3.60
  -2  15   1    7.80    3.50
   1 -15  -1   11.90    3.90
   1 -15  -1   16.40    5.10
  -1  15   1   18.00    3.40
  -1  15   1   19.90    4.60
  -1  15   1   15.10    3.60
  -1  15   1    9.80    3.30
  -1  15   1   19.80    4.10
   0 -15  -1    3.00    4.60
   0 -15  -1    2.90    3.80
   0  15   1   -7.90    4.40
   0  15   1    0.00    3.30
   0  15   1    1.20    3.20
   0  15   1    6.30    3.90
  -1 -15  -1   13.80    5.10
  -1 -15  -1   16.80    3.80
   1  15   1   13.80    3.20
   1  15   1   18.60    3.80
   1  15   1   18.80    4.70
   1  15   1   21.20    3.80
  -2 -15  -1   18.90    5.10
  -2 -15  -1   11.40    3.40
   2  15   1   18.60    3.70
   2  15   1   17.20    3.90
  -3 -15  -1    2.40    3.80
  -3 -15  -1    1.00    5.20
   3  15   1    1.80    3.30
   3  15   1    3.80    3.30
  -4 -15  -1   -5.00    4.50
  -4 -15  -1   -0.40    3.50
   4  15   1   -0.20    3.10
   4  15   1    2.90    3.60
  -5 -15  -1    0.10    3.60
  -5 -15  -1   -3.00    4.80
   5  15   1   -1.80    3.40
   5  15   1    3.60    3.50
  -6 -15  -1   12.00    3.90
  -6 -15  -1   12.00    4.40
   6  15   1    9.30    3.50
   6  15   1   11.90    3.40
  -7 -15  -1    4.60    4.50
  -7 -15  -1    6.20    3.70
   7  15   1    2.00    3.50
  -8 -15  -1   -5.30    4.00
  -8 -15  -1    3.30    3.60
   8  15   1   -2.80    3.30
  -9 -15  -1    6.50    3.80
  -9 -15  -1   -2.80    3.40
   9  15   1    5.40    3.40
 -12  16   1   -1.60    3.80
 -12  16   1    2.30    3.80
 -11  16   1    0.10    4.00
 -11  16   1    4.20    4.10
 -11  16   1   -3.90    4.10
 -10  16   1    1.50    4.70
 -10  16   1    1.90    3.80
 -10  16   1   -4.20    3.00
 -10  16   1    2.30    4.30
  -9  16   1    5.10    4.90
  -9  16   1    0.70    4.20
  -9  16   1    6.30    3.60
  -9  16   1    9.80    3.40
   8 -16  -1    1.50    4.20
  -8  16   1    2.60    4.70
  -8  16   1    1.80    3.40
  -8  16   1    4.10    4.00
  -8  16   1   -0.90    4.40
   7 -16  -1   10.00    4.40
  -7  16   1   11.90    5.60
  -7  16   1   12.30    3.80
  -7  16   1    4.20    4.20
  -7  16   1    7.90    3.80
   6 -16  -1    8.80    4.20
  -6  16   1    4.30    3.90
  -6  16   1   -2.40    3.40
  -6  16   1    3.70    3.40
  -6  16   1    4.90    5.50
  -6  16   1    8.10    4.60
   5 -16  -1    2.00    3.90
  -5  16   1    9.90    3.60
  -5  16   1   10.20    3.50
  -5  16   1    5.00    4.50
  -5  16   1    4.60    3.80
  -5  16   1   10.80    5.30
   4 -16  -1    5.00    3.80
  -4  16   1   -0.50    3.20
  -4  16   1    8.60    5.30
  -4  16   1    4.00    3.80
  -4  16   1    5.70    3.50
  -4  16   1    1.30    4.40
   3 -16  -1    3.20    3.80
  -3  16   1    7.80    3.50
  -3  16   1    6.90    4.00
  -3  16   1   11.40    4.00
  -3  16   1   10.10    4.70
   2 -16  -1   -0.80    3.70
   2 -16  -1    3.50    5.50
  -2  16   1    4.70    3.50
  -2  16   1    7.20    4.60
  -2  16   1    5.90    4.10
  -2  16   1    7.50    3.40
   1 -16  -1   14.50    4.20
   1 -16  -1   22.00    5.30
  -1  16   1   22.60    3.90
  -1  16   1   17.50    4.10
  -1  16   1   16.40    5.10
  -1  16   1   24.00    4.00
   0 -16  -1    4.00    5.60
   0 -16  -1    2.30    3.70
   0  16   1    1.70    3.60
   0  16   1    1.20    3.40
   0  16   1    1.10    3.30
   0  16   1    3.40    4.90
  -1 -16  -1    9.20    3.60
  -1 -16  -1    9.70    5.50
   1  16   1   16.20    3.90
   1  16   1   14.90    4.00
   1  16   1    7.60    3.60
  -2 -16  -1    0.30    3.70
  -2 -16  -1   13.40    5.30
   2  16   1   11.20    4.00
   2  16   1   12.90    3.90
  -3 -16  -1   -3.90    5.10
  -3 -16  -1    1.50    3.40
   3  16   1    1.00    3.70
   3  16   1    0.40    3.30
  -4 -16  -1   57.19    6.90
  -4 -16  -1   57.19    5.70
   4  16   1   63.39    5.80
   4  16   1   51.09    5.20
  -5 -16  -1   16.40    4.90
  -5 -16  -1   14.00    3.70
   5  16   1   16.90    3.40
   5  16   1   13.00    3.80
  -6 -16  -1   62.19    5.50
  -6 -16  -1   53.19    6.80
   6  16   1   63.19    5.60
   6  16   1   49.10    4.80
  -7 -16  -1    6.60    3.60
  -7 -16  -1    3.10    3.90
   7  16   1    5.70    3.30
  -8 -16  -1    2.00    3.50
  -8 -16  -1    2.80    3.40
   8  16   1    1.30    3.20
  10 -17  -1    1.40    3.00
 -10  17   1   -4.10    2.60
 -10  17   1   -1.60    4.20
 -10  17   1    0.70    3.90
 -10  17   1    2.80    4.30
   9 -17  -1    2.30    3.40
  -9  17   1    6.30    3.70
  -9  17   1    6.80    4.40
  -9  17   1    2.60    3.00
  -9  17   1    0.50    4.40
   8 -17  -1   -4.60    3.60
  -8  17   1   -0.50    4.60
  -8  17   1   -0.40    3.80
  -8  17   1    2.50    3.00
  -8  17   1    5.20    4.60
   7 -17  -1   23.30    4.00
  -7  17   1   47.60    7.40
  -7  17   1   39.20    4.90
  -7  17   1   29.00    5.00
  -7  17   1   36.60    5.70
   6 -17  -1    8.00    3.60
  -6  17   1    9.00    4.60
  -6  17   1    8.30    3.70
  -6  17   1    5.80    3.20
  -6  17   1   14.40    5.40
  -6  17   1   12.00    3.90
   5 -17  -1    0.80    3.70
  -5  17   1   -2.50    3.60
  -5  17   1   -2.90    5.30
  -5  17   1    1.70    4.50
  -5  17   1    1.00    3.50
  -5  17   1    2.20    4.00
   4 -17  -1    3.80    3.60
  -4  17   1   -2.40    4.50
  -4  17   1    1.10    3.60
  -4  17   1    0.00    3.80
  -4  17   1    4.90    3.40
   3 -17  -1    8.80    3.90
   3 -17  -1   16.50    5.60
  -3  17   1    3.50    3.90
  -3  17   1   15.30    3.80
  -3  17   1    4.50    3.40
  -3  17   1    6.30    4.90
   2 -17  -1   28.40    5.70
   2 -17  -1   21.60    4.20
  -2  17   1   15.10    4.10
  -2  17   1   18.20    3.90
  -2  17   1   19.20    5.40
  -2  17   1   23.20    4.10
   1 -17  -1   28.80    5.40
   1 -17  -1   26.50    4.00
  -1  17   1   30.50    5.60
  -1  17   1   26.30    4.00
  -1  17   1   14.00    3.90
   0 -17  -1    5.80    3.20
   0 -17  -1    2.50    5.60
   0  17   1    5.40    3.80
   0  17   1   -1.60    4.90
   0  17   1  -10.50    5.70
   0  17   1   -1.80    3.40
  -1 -17  -1    0.60    3.50
  -1 -17  -1   -3.00    5.00
   1  17   1    6.40    3.60
   1  17   1   -1.00    3.40
   1  17   1    7.10    3.80
  -2 -17  -1   -3.30    4.80
  -2 -17  -1    1.60    3.40
   2  17   1    2.00    3.70
   2  17   1    5.10    3.60
  -3 -17  -1   16.50    3.50
  -3 -17  -1   12.60    5.00
   3  17   1   13.60    3.60
   3  17   1   14.30    3.60
  -4 -17  -1    3.60    4.60
  -4 -17  -1    2.60    3.30
   4  17   1    0.50    3.10
   4  17   1    2.60    3.50
  -5 -17  -1    1.20    4.00
  -5 -17  -1    1.20    3.10
   5  17   1   -3.00    3.10
   5  17   1    3.20    3.30
  -6 -17  -1    9.70    4.00
  -6 -17  -1    9.90    3.40
   6  17   1    6.80    2.90
   6  17   1    7.60    3.20
   9 -18  -1    2.80    2.70
  -9  18   1   -2.80    2.40
  -9  18   1    7.40    3.90
  -9  18   1    3.20    3.60
  -9  18   1    3.70    4.10
   8 -18  -1    1.50    2.90
  -8  18   1    5.10    3.60
  -8  18   1    6.70    4.20
  -8  18   1    6.10    4.60
  -8  18   1    2.00    2.70
   7 -18  -1    7.40    3.10
  -7  18   1   12.30    3.00
  -7  18   1    7.00    3.80
  -7  18   1   23.20    4.60
  -7  18   1   16.30    4.90
   6 -18  -1    3.50    3.00
  -6  18   1    6.60    3.20
  -6  18   1    1.00    4.60
  -6  18   1   12.20    4.20
  -6  18   1    3.70    2.80
   5 -18  -1   -1.10    3.20
  -5  18   1   -1.80    3.00
  -5  18   1    3.20    3.30
  -5  18   1   -5.30    4.10
  -5  18   1   -1.60    4.70
   4 -18  -1    5.20    3.60
   4 -18  -1    3.90    5.00
  -4  18   1    2.50    4.00
  -4  18   1    8.90    3.40
  -4  18   1   19.00    5.10
  -4  18   1    6.90    3.40
   3 -18  -1    0.60    4.80
   3 -18  -1   -7.20    3.30
  -3  18   1    1.30    3.30
  -3  18   1   -2.00    5.10
  -3  18   1   -6.90    3.80
  -3  18   1    0.50    3.50
   2 -18  -1    8.30    5.10
   2 -18  -1    0.50    3.30
  -2  18   1   -4.50    4.90
  -2  18   1    0.60    3.70
  -2  18   1   -0.80    3.20
   1 -18  -1   10.50    3.20
   1 -18  -1    0.10    5.30
  -1  18   1   -2.00    3.10
  -1  18   1   -5.20    4.70
  -1  18   1    2.90    3.60
   0 -18  -1    6.40    3.30
   0 -18  -1   -2.10    4.70
   0  18   1    3.00    3.60
   0  18   1    1.20    3.30
  -1 -18  -1    4.00    4.80
  -1 -18  -1    5.10    3.20
   1  18   1    0.10    3.40
   1  18   1    4.80    3.50
  -2 -18  -1   -0.50    4.40
  -2 -18  -1    0.30    3.10
   2  18   1   -2.10    3.40
   2  18   1    0.50    3.40
  -3 -18  -1    0.40    2.90
  -3 -18  -1    0.90    4.20
   3  18   1    3.60    3.30
   3  18   1    3.80    3.40
  -4 -18  -1    8.90    3.00
  -4 -18  -1    7.90    4.10
   4  18   1    4.30    3.10
   4  18   1    5.70    3.20
  -7  19   1    1.00    3.40
   6 -19  -1    3.90    2.70
   6 -19  -1    3.40    4.30
  -6  19   1    1.80    2.70
  -6  19   1    3.60    3.60
  -6  19   1    0.90    4.20
   5 -19  -1    1.00    2.90
   5 -19  -1   -0.90    4.40
  -5  19   1   -6.60    4.40
  -5  19   1   -4.00    3.50
  -5  19   1   -2.70    2.40
  -5  19   1   -2.00    3.20
   4 -19  -1    7.60    2.90
   4 -19  -1   13.90    4.60
  -4  19   1    8.00    3.00
  -4  19   1    1.90    4.70
  -4  19   1   22.60    3.60
  -4  19   1   15.50    3.90
   3 -19  -1    1.70    4.60
   3 -19  -1    4.20    2.80
  -3  19   1    2.00    2.90
  -3  19   1   -2.50    4.40
  -3  19   1   -1.60    3.40
  -3  19   1   -7.10    5.40
   2 -19  -1   -2.20    4.40
   2 -19  -1    3.30    2.70
  -2  19   1    3.00    3.10
  -2  19   1   -4.00    4.30
  -2  19   1    4.60    3.00
   1 -19  -1    1.60    4.40
   1 -19  -1    3.10    2.80
  -1  19   1    2.10    3.00
  -1  19   1    2.70    3.10
   0 -19  -1    6.60    2.80
   0 -19  -1   -3.70    4.40
   0  19   1   -9.00    2.80
   0  19   1   -0.60    3.10
  -1 -19  -1    0.90    4.10
  -1 -19  -1    5.80    2.70
   1  19   1    2.60    3.10
  -2 -19  -1    1.00    4.00
  -2 -19  -1   -0.20    2.50
   2  19   1    3.70    3.10
   2  19  -2    6.80    2.90
  -2 -19   2   -2.90    3.60
  -2 -19   2    2.20    3.00
   1  19  -2   -1.60    3.00
  -1 -19   2    4.00    4.00
  -1 -19   2    1.00    3.20
   0  19  -2   -5.10    3.30
   0  19  -2    0.20    3.10
   0 -19   2   -0.30    3.90
   0 -19   2    2.50    3.20
  -1  19  -2   -3.20    3.40
  -1  19  -2    6.80    3.10
   1 -19   2    0.70    4.40
   1 -19   2    6.50    3.30
  -2  19  -2    9.30    3.20
  -2  19  -2    9.10    3.70
   2 -19   2    1.20    4.40
   2 -19   2    9.80    3.60
  -3  19  -2   -4.60    2.80
  -3  19  -2    2.00    3.60
   3 -19   2   -0.10    3.50
   3 -19   2    1.70    4.40
  -4  19  -2   15.20    3.60
  -4  19  -2   15.30    3.00
  -4  19  -2    7.80    3.80
   4 -19   2   10.80    3.50
   4 -19   2    8.10    4.40
  -5  19  -2   19.50    3.80
  -5  19  -2    8.80    3.40
   5 -19   2   19.00    4.50
   5 -19   2   12.00    3.50
  -6  19  -2   -8.00    3.70
  -6  19  -2   -1.40    3.00
  -6  19  -2    4.00    3.60
   6 -19   2    5.90    3.10
   6 -19   2   -1.20    4.10
   5  18  -2    6.40    2.90
   5  18  -2    2.20    2.70
  -5 -18   2    6.00    3.30
  -5 -18   2    6.90    3.20
   4  18  -2    1.50    2.90
   4  18  -2    2.20    3.00
  -4 -18   2   -2.00    3.60
  -4 -18   2   -0.40    3.30
   3  18  -2    7.50    3.00
   3  18  -2    1.60    3.20
  -3 -18   2    5.40    3.60
  -3 -18   2    0.80    4.00
   2  18  -2    4.60    3.30
  -2 -18   2    4.00    3.60
  -2 -18   2    1.20    4.30
   1  18  -2    1.20    3.30
   1  18  -2   -2.90    3.40
  -1 -18   2   -0.50    3.60
  -1 -18   2    1.10    4.40
   0  18  -2    7.00    3.80
   0  18  -2    7.30    3.90
   0 -18   2   -0.50    4.40
   0 -18   2    2.00    3.40
  -1  18  -2   33.20    5.00
  -1  18  -2   27.80    4.40
   1 -18   2   35.40    5.80
   1 -18   2   34.90    5.70
  -2  18  -2   -2.40    3.60
  -2  18  -2    4.40    4.00
   2 -18   2   -4.40    4.10
   2 -18   2   -0.70    4.60
  -3  18  -2    2.40    3.20
  -3  18  -2   -5.70    3.60
  -3  18  -2    0.90    3.80
   3 -18   2   -2.10    4.00
   3 -18   2    0.30    4.50
  -4  18  -2   -5.60    4.40
  -4  18  -2   -4.50    3.00
  -4  18  -2   -7.60    3.80
  -4  18  -2   -0.80    3.70
   4 -18   2   -1.00    3.70
   4 -18   2    7.10    4.90
  -5  18  -2    3.20    3.60
  -5  18  -2   -0.90    3.00
  -5  18  -2    6.20    4.50
  -5  18  -2   -4.40    3.70
   5 -18   2   -4.90    3.80
  -6  18  -2    1.80    5.00
  -6  18  -2    5.80    4.20
  -6  18  -2    1.80    3.70
  -6  18  -2   -2.20    3.50
   6 -18   2    1.20    3.70
  -7  18  -2    3.50    3.20
  -7  18  -2    9.20    3.90
  -7  18  -2    3.20    4.90
  -7  18  -2    2.20    4.10
   7 -18   2    7.40    3.60
  -8  18  -2   -0.40    3.00
  -8  18  -2   -3.40    4.10
  -8  18  -2   -3.00    4.50
  -8  18  -2   -1.60    3.50
   8 -18   2    3.30    3.50
   6  17  -2    5.20    2.80
   6  17  -2    6.50    3.30
  -6 -17   2    2.10    3.70
  -6 -17   2    1.90    3.50
   5  17  -2   12.00    3.30
   5  17  -2   10.40    3.50
  -5 -17   2    7.90    3.60
  -5 -17   2    4.20    3.90
   4  17  -2    8.20    3.60
   4  17  -2   10.60    3.50
  -4 -17   2   11.40    4.50
  -4 -17   2   13.30    4.00
   3  17  -2   -1.20    3.90
   3  17  -2    1.30    3.30
  -3 -17   2   -1.70    4.40
  -3 -17   2    2.30    3.80
   2  17  -2   12.50    3.90
   2  17  -2    6.20    3.50
  -2 -17   2    7.10    4.00
  -2 -17   2   15.30    5.10
   1  17  -2   38.50    5.60
   1  17  -2   49.50    5.20
  -1 -17   2   43.10    7.30
  -1 -17   2   56.19    5.90
   0  17  -2   49.30    5.40
   0  17  -2   32.40    4.70
   0 -17   2   34.90    4.90
   0 -17   2   35.20    6.10
  -1  17  -2    2.70    3.60
  -1  17  -2   -0.70    4.00
   1 -17   2    3.60    5.00
   1 -17   2   -2.20    4.10
  -2  17  -2    1.00    3.90
  -2  17  -2   -1.20    3.90
   2 -17   2   -0.90    4.20
   2 -17   2    5.00    5.20
  -3  17  -2    6.90    3.80
  -3  17  -2   10.10    4.00
  -3  17  -2    7.00    4.70
  -3  17  -2    8.10    4.00
   3 -17   2   12.80    4.30
  -4  17  -2   42.00    6.50
  -4  17  -2   34.50    5.00
  -4  17  -2   46.80    7.00
  -4  17  -2   29.10    4.50
  -4  17  -2   41.50    5.20
   4 -17   2   41.20    5.50
  -5  17  -2   11.20    5.30
  -5  17  -2   -2.60    4.80
  -5  17  -2    0.70    4.20
  -5  17  -2    3.60    3.60
  -5  17  -2    3.80    3.30
   5 -17   2    7.10    4.50
  -6  17  -2   21.00    5.60
  -6  17  -2   19.40    4.40
  -6  17  -2   27.00    5.10
  -6  17  -2   19.80    4.10
   6 -17   2   24.10    4.80
  -7  17  -2    0.60    4.90
  -7  17  -2    0.20    3.50
  -7  17  -2    4.40    5.00
  -7  17  -2    3.00    4.20
   7 -17   2    1.20    4.60
  -8  17  -2   21.30    4.80
  -8  17  -2   10.00    4.10
  -8  17  -2   25.70    3.90
  -8  17  -2   18.50    5.40
   8 -17   2   16.20    4.30
  -9  17  -2    5.30    3.20
  -9  17  -2    8.40    4.40
  -9  17  -2   12.20    5.00
  -9  17  -2    5.00    3.90
   9 -17   2    5.90    3.80
 -10  17  -2    1.60    3.70
 -10  17  -2    0.20    2.60
 -10  17  -2    0.20    4.20
 -10  17  -2    1.70    4.20
  10 -17   2    3.80    3.80
   8  16  -2    6.70    3.20
  -8 -16   2    3.00    3.50
  -8 -16   2    8.30    3.50
   7  16  -2    4.90    2.80
   7  16  -2   -4.60    3.30
  -7 -16   2    4.90    3.60
  -7 -16   2    1.20    3.70
   6  16  -2   -2.80    3.50
   6  16  -2   -2.20    3.20
  -6 -16   2   -3.20    4.20
  -6 -16   2    2.10    3.80
   5  16  -2   13.30    3.70
   5  16  -2   20.20    3.90
  -5 -16   2   15.20    4.70
  -5 -16   2   11.10    4.00
   4  16  -2   -0.30    3.90
   4  16  -2    1.90    3.80
  -4 -16   2   -5.50    4.50
  -4 -16   2   -1.40    3.70
   3  16  -2   90.49    6.40
   3  16  -2   86.29    6.00
   3  16  -2   81.89    9.70
  -3 -16   2   76.99    7.20
  -3 -16   2   71.49    8.10
   2  16  -2    7.80    5.80
   2  16  -2   12.60    3.80
   2  16  -2   14.30    4.20
   2  16  -2   11.10    3.60
  -2 -16   2    7.40    5.20
  -2 -16   2   10.30    4.10
   1  16  -2    2.10    3.70
   1  16  -2   -3.90    5.40
   1  16  -2    3.10    3.80
  -1 -16   2    1.10    4.10
  -1 -16   2    3.30    5.40
   0  16  -2    1.20    3.80
   0  16  -2   -3.70    4.50
   0  16  -2   -2.00    4.10
   0 -16   2   -1.40    4.50
   0 -16   2    1.90    5.20
  -1  16  -2   10.70    5.60
  -1  16  -2    0.90    3.80
  -1  16  -2   10.10    3.90
   1 -16   2   11.40    5.30
   1 -16   2    3.40    4.10
  -2  16  -2    4.00    3.80
  -2  16  -2   -0.20    5.00
  -2  16  -2    3.90    3.90
  -2  16  -2    3.70    4.20
  -2  16  -2    7.30    4.70
   2 -16   2   -0.20    4.30
  -3  16  -2   -7.50    3.90
  -3  16  -2    4.50    3.90
  -3  16  -2    3.00    5.80
  -3  16  -2    2.20    4.00
  -3  16  -2    1.00    5.50
  -3  16  -2    3.90    4.50
   3 -16   2   -4.20    4.00
  -4  16  -2   18.20    4.40
  -4  16  -2   17.60    4.00
  -4  16  -2   22.50    5.10
  -4  16  -2   21.10    4.30
  -4  16  -2   36.80    6.00
   4 -16   2   18.10    4.50
  -5  16  -2   22.90    4.00
  -5  16  -2   33.90    5.40
  -5  16  -2   38.70    7.00
  -5  16  -2   42.30    5.20
  -5  16  -2   42.20    6.20
   5 -16   2   38.20    5.70
  -6  16  -2   22.20    4.30
  -6  16  -2   30.10    5.20
  -6  16  -2   16.40    5.90
  -6  16  -2   23.40    4.30
   6 -16   2   28.70    5.10
  -7  16  -2   22.80    4.40
  -7  16  -2   24.50    5.80
  -7  16  -2   21.20    4.20
  -7  16  -2   23.50    4.80
   7 -16   2   29.30    5.40
  -8  16  -2   -1.80    3.90
  -8  16  -2   -1.90    4.60
  -8  16  -2    0.60    4.20
  -8  16  -2    1.40    5.20
  -9  16  -2   19.00    5.30
  -9  16  -2   26.50    4.60
  -9  16  -2   35.10    5.00
  -9  16  -2   33.30    5.00
 -10  16  -2   -4.80    4.90
 -10  16  -2   -0.50    3.10
 -10  16  -2   -2.90    4.40
 -10  16  -2    2.50    4.50
 -11  16  -2   -4.70    4.10
 -11  16  -2   -5.80    4.10
 -11  16  -2   -6.40    4.30
   9  15  -2   13.20    3.60
  -9 -15   2    4.40    3.70
  -9 -15   2   16.20    4.00
   8  15  -2    8.60    3.40
  -8 -15   2    8.70    4.00
  -8 -15   2   14.40    4.20
   7  15  -2    1.20    3.30
   7  15  -2    7.40    3.60
  -7 -15   2    0.60    3.80
  -7 -15   2    6.60    4.30
   6  15  -2    4.80    3.80
   6  15  -2    0.90    3.50
  -6 -15   2    4.30    4.40
  -6 -15   2   -0.20    4.10
   5  15  -2   28.70    7.90
   5  15  -2   27.20    4.20
   5  15  -2   23.80    3.90
  -5 -15   2   25.60    5.10
  -5 -15   2   14.40    4.10
   4  15  -2   10.00    5.50
   4  15  -2   18.50    4.10
   4  15  -2   12.70    3.70
  -4 -15   2   13.20    5.20
  -4 -15   2   24.00    4.50
   3  15  -2   14.10    3.90
   3  15  -2   16.60    4.20
   3  15  -2    8.30    5.50
  -3 -15   2    5.40    5.00
  -3 -15   2   11.30    3.90
   2  15  -2   10.20    4.00
   2  15  -2    6.90    5.10
   2  15  -2   -2.30    3.40
   2  15  -2    0.80    3.50
  -2 -15   2    1.90    3.50
  -2 -15   2   -0.50    4.60
   1  15  -2    9.70    3.60
   1  15  -2   16.90    5.00
   1  15  -2    5.80    3.30
   1  15  -2   15.30    4.10
  -1 -15   2   11.00    4.50
  -1 -15   2   11.10    5.30
   0  15  -2    0.60    4.00
   0  15  -2    3.50    3.30
   0  15  -2    4.80    4.60
   0 -15   2    6.10    5.00
   0 -15   2   -5.80    4.20
  -1  15  -2   -1.50    4.80
  -1  15  -2    3.80    3.40
  -1  15  -2    3.60    3.40
  -1  15  -2    6.70    4.30
   1 -15   2    5.10    4.10
  -2  15  -2    6.10    3.20
  -2  15  -2   10.80    5.30
  -2  15  -2    1.90    3.50
  -2  15  -2    9.30    4.50
  -2  15  -2   -4.90    3.90
  -2  15  -2   11.50    4.00
   2 -15   2   12.00    4.00
  -3  15  -2   -2.40    3.60
  -3  15  -2   -1.40    4.20
  -3  15  -2    4.80    5.30
  -3  15  -2   -2.10    3.10
  -3  15  -2   -4.90    4.60
  -3  15  -2    3.10    3.50
   3 -15   2    7.50    4.50
  -4  15  -2   49.40    7.10
  -4  15  -2   50.59    7.10
  -4  15  -2   53.69    5.50
  -4  15  -2   59.99    5.40
  -4  15  -2   57.69    9.30
  -4  15  -2   51.69    5.50
   4 -15   2   79.29    7.30
  -5  15  -2    2.80    3.50
  -5  15  -2   12.30    4.50
  -5  15  -2   -3.20    3.60
  -5  15  -2    2.00    4.90
  -5  15  -2    6.80    3.70
   5 -15   2    6.50    5.00
  -6  15  -2   10.30    4.30
  -6  15  -2   12.90    4.20
  -6  15  -2    9.90    4.80
  -6  15  -2   10.10    5.70
  -7  15  -2   81.19    8.30
  -7  15  -2   77.39    7.00
  -7  15  -2   88.89    7.30
  -7  15  -2   82.99    8.90
  -8  15  -2    7.90    4.80
  -8  15  -2    0.80    4.00
  -8  15  -2   -1.70    4.90
  -8  15  -2   -0.20    4.70
  -8  15  -2    1.40    3.90
  -9  15  -2    2.10    4.90
  -9  15  -2   -0.60    4.10
  -9  15  -2   -3.30    4.90
  -9  15  -2    2.90    4.00
  -9  15  -2    0.10    4.70
 -10  15  -2   16.40    4.80
 -10  15  -2   10.10    4.80
 -10  15  -2   13.60    4.40
 -10  15  -2   10.50    3.50
 -10  15  -2   14.20    5.10
 -11  15  -2   38.20    6.20
 -11  15  -2   26.20    5.10
 -11  15  -2   43.10    5.50
 -11  15  -2   47.90    5.90
 -12  15  -2    3.60    4.10
 -12  15  -2   -0.70    4.40
 -12  15  -2   -6.90    4.30
 -12  15  -2    9.00    4.30
  10  14  -2    5.00    3.40
 -10 -14   2    0.30    3.90
 -10 -14   2    9.30    3.70
   9  14  -2    9.30    3.80
  -9 -14   2    2.30    4.10
  -9 -14   2   15.80    4.20
   8  14  -2    5.70    3.70
  -8 -14   2    7.80    3.90
  -8 -14   2    5.70    4.20
   7  14  -2   15.70    3.80
   7  14  -2   20.60    3.80
  -7 -14   2   18.80    4.90
  -7 -14   2   17.20    4.50
   6  14  -2    3.30    3.90
   6  14  -2    3.50    3.70
  -6 -14   2   -1.40    4.60
  -6 -14   2    2.00    4.00
   5  14  -2    6.00    4.90
   5  14  -2    5.30    3.80
   5  14  -2    8.60    3.30
  -5 -14   2   -0.90    4.90
  -5 -14   2    2.90    3.80
   4  14  -2   22.20    5.30
   4  14  -2    8.80    3.70
   4  14  -2   18.30    3.70
  -4 -14   2    8.60    5.20
  -4 -14   2    5.40    4.20
   3  14  -2  136.29    7.70
   3  14  -2  130.99    8.00
   3  14  -2  132.39    9.30
  -3 -14   2  140.19    9.70
  -3 -14   2  140.89    8.00
   2  14  -2   12.30    4.40
   2  14  -2   11.10    3.10
   2  14  -2    6.50    3.10
   2  14  -2   11.00    3.60
  -2 -14   2    3.80    3.90
  -2 -14   2   12.50    5.00
   1  14  -2   10.40    2.90
   1  14  -2   11.40    3.80
   1  14  -2   11.40    3.20
   1  14  -2    8.10    4.60
  -1 -14   2    4.80    3.70
  -1 -14   2    9.40    4.30
   0  14  -2   32.10    4.20
   0  14  -2   36.60    4.90
   0  14  -2   22.60    4.90
   0 -14   2   37.00    5.50
   0 -14   2   31.40    4.90
   0 -14   2   32.20    8.70
  -1  14  -2   11.10    4.10
  -1  14  -2   12.60    3.30
  -1  14  -2    7.20    3.20
  -1  14  -2   14.60    4.20
  -1  14  -2   12.00    3.00
  -1  14  -2   16.00    3.60
   1 -14   2    1.00    7.60
   1 -14   2   13.20    4.00
  -2  14  -2   13.20    4.30
  -2  14  -2   15.80    3.30
  -2  14  -2   10.80    7.00
  -2  14  -2   15.00    4.40
  -2  14  -2   17.10    3.20
  -2  14  -2   19.80    4.00
  -2  14  -2   24.50    3.90
   2 -14   2   20.50    8.00
   2 -14   2   22.90    4.00
  -3  14  -2   28.50    5.30
  -3  14  -2   33.80    4.60
  -3  14  -2   29.50    5.30
  -3  14  -2   24.20    8.10
  -3  14  -2   28.90    4.50
  -3  14  -2   36.90    4.40
  -3  14  -2   54.89    6.10
   3 -14   2   10.50    8.40
   3 -14   2   43.90    5.70
  -4  14  -2   17.00    3.60
  -4  14  -2   15.80    3.60
  -4  14  -2    6.20    8.60
  -4  14  -2   28.40    4.30
  -4  14  -2   11.50    4.50
  -4  14  -2   16.20    3.60
  -4  14  -2   19.40    5.40
   4 -14   2   28.00    4.80
   4 -14   2    9.60    7.90
  -5  14  -2    1.40    3.50
  -5  14  -2    3.40    4.60
  -5  14  -2   -1.90    5.40
  -5  14  -2    5.10    3.10
  -5  14  -2    1.30    3.20
  -5  14  -2   -3.70    4.30
   5 -14   2   -4.20    8.60
  -6  14  -2   45.20    7.50
  -6  14  -2   26.80    4.90
  -6  14  -2   20.60    3.80
  -6  14  -2   16.50    4.70
  -6  14  -2   34.60    5.00
   6 -14   2   14.80    9.50
  -7  14  -2   48.30    5.40
  -7  14  -2   45.00    5.70
  -7  14  -2   45.00    5.30
  -7  14  -2   34.20    6.10
  -7  14  -2   42.30    5.80
  -8  14  -2    9.40    4.80
  -8  14  -2    5.50    4.20
  -8  14  -2   12.20    4.20
  -8  14  -2    2.10    5.40
  -8  14  -2    5.90    5.00
  -9  14  -2   23.90    5.80
  -9  14  -2   28.00    5.10
  -9  14  -2   16.40    4.60
  -9  14  -2   25.00    4.30
  -9  14  -2   37.60    5.50
 -10  14  -2   27.70    5.30
 -10  14  -2   39.00    6.20
 -10  14  -2   23.40    5.50
 -10  14  -2   18.10    3.90
 -10  14  -2   31.60    5.30
 -11  14  -2    9.00    4.50
 -11  14  -2   19.30    5.30
 -11  14  -2   15.10    4.60
 -11  14  -2   18.60    5.50
 -12  14  -2   14.20    4.40
 -12  14  -2   14.70    4.90
 -12  14  -2   18.80    4.90
 -12  14  -2   21.40    4.90
 -13  14  -2   -2.70    4.20
 -13  14  -2   -3.10    4.30
 -13  14  -2    4.00    4.40
 -13  14  -2    2.10    4.10
  11  13  -2   14.30    2.90
  11  13  -2   19.00    3.70
 -11 -13   2   14.10    3.60
 -11 -13   2    9.50    3.90
  10  13  -2   14.00    3.80
  10  13  -2   13.20    3.10
 -10 -13   2    4.60    4.20
 -10 -13   2   10.20    4.10
   9  13  -2   -3.00    3.60
   9  13  -2   -2.20    3.00
  -9 -13   2   -1.70    4.30
  -9 -13   2   -4.00    4.10
   8  13  -2    2.40    4.10
   8  13  -2    1.30    3.90
   8  13  -2   -0.60    3.10
  -8 -13   2    0.30    4.20
  -8 -13   2    4.60    4.20
   7  13  -2   11.70    3.50
   7  13  -2   18.00    4.20
  -7 -13   2    8.50    4.60
  -7 -13   2   13.80    4.00
   6  13  -2  107.99    6.60
   6  13  -2   86.89    6.00
  -6 -13   2   99.39    6.80
  -6 -13   2   89.99    7.50
   5  13  -2   37.00    4.30
   5  13  -2   27.10    5.10
   5  13  -2   41.50    5.40
  -5 -13   2   35.00    5.90
  -5 -13   2   27.80    5.20
   4  13  -2    6.10    3.70
   4  13  -2   12.50    4.40
   4  13  -2    7.50    3.10
  -4 -13   2    6.70    3.40
  -4 -13   2   10.70    4.60
   3  13  -2   -2.20    4.30
   3  13  -2    1.00    2.80
   3  13  -2   -0.80    3.10
  -3 -13   2   -1.70    6.50
  -3 -13   2    1.30    4.30
  -3 -13   2    2.70    3.10
   2  13  -2    7.20    2.90
   2  13  -2   13.50    4.20
   2  13  -2    5.40    3.00
   2  13  -2    6.30    3.20
  -2 -13   2    6.40    6.70
  -2 -13   2    5.70    3.20
  -2 -13   2   12.10    4.50
   1  13  -2    1.10    2.90
   1  13  -2    1.50    2.60
   1  13  -2    3.20    2.70
   1  13  -2    2.10    4.20
  -1 -13   2    7.30    4.50
  -1 -13   2   -2.80    6.80
  -1 -13   2   -5.90    3.30
   0  13  -2  122.19    6.70
   0  13  -2  114.69    6.90
   0  13  -2  132.49    9.10
   0  13  -2  110.99    6.70
   0 -13   2  110.59   12.30
   0 -13   2  116.59    7.10
  -1  13  -2  113.19    6.50
  -1  13  -2  110.99    8.20
  -1  13  -2  112.29    7.30
  -1  13  -2  107.59    6.40
  -1  13  -2  108.99    7.60
  -1  13  -2  113.19    6.60
  -1  13  -2  115.69   11.00
   1 -13   2  129.39    7.10
   1 -13   2  110.69   11.80
  -2  13  -2   26.40    3.80
  -2  13  -2   22.10    4.70
  -2  13  -2   32.40    5.50
  -2  13  -2   32.10    4.10
  -2  13  -2   30.30    3.90
  -2  13  -2   23.30    3.60
  -2  13  -2   19.10    7.30
   2 -13   2   26.60    8.40
   2 -13   2   36.10    4.60
  -3  13  -2   78.89   11.00
  -3  13  -2   85.79    5.80
  -3  13  -2   88.19    6.70
  -3  13  -2   90.49    7.00
  -3  13  -2   91.19    5.70
  -3  13  -2   90.09    7.60
  -3  13  -2   90.19    6.00
   3 -13   2   89.99   11.80
   3 -13   2   85.59    6.60
  -4  13  -2   -4.10    3.50
  -4  13  -2    0.30    3.20
  -4  13  -2    2.40    2.80
  -4  13  -2    4.80    2.90
  -4  13  -2   -2.30    6.90
  -4  13  -2    2.00    2.90
  -4  13  -2    3.80    4.10
  -4  13  -2    4.30    3.80
   4 -13   2  -17.10    7.30
  -5  13  -2    4.60    4.00
  -5  13  -2   11.80    4.00
  -5  13  -2    7.40    3.10
  -5  13  -2    3.70    4.50
  -5  13  -2   15.00    7.80
  -5  13  -2   10.10    3.20
  -5  13  -2    7.70    3.10
  -5  13  -2    4.40    3.60
   5 -13   2    8.90    8.00
  -6  13  -2    2.10    3.20
  -6  13  -2    0.10    3.70
  -6  13  -2    4.10    4.20
  -6  13  -2   -7.00    5.00
  -6  13  -2    4.90    4.80
  -6  13  -2    4.10    8.10
  -6  13  -2   -3.20    3.40
   6 -13   2  -23.20    8.40
  -7  13  -2  109.59    7.40
  -7  13  -2  107.69    6.70
  -7  13  -2  115.89    8.30
  -7  13  -2   95.19    6.90
  -7  13  -2  111.99    8.20
   7 -13   2   57.29   11.80
  -8  13  -2   41.70    6.90
  -8  13  -2   39.50    6.20
  -8  13  -2   39.40    5.80
  -8  13  -2   43.80    6.30
  -8  13  -2   36.10    5.60
   8 -13   2   20.50   10.60
  -9  13  -2   -9.80    3.90
  -9  13  -2    0.50    4.20
  -9  13  -2    4.40    5.70
  -9  13  -2   -0.20    4.40
  -9  13  -2   10.80    5.00
 -10  13  -2    4.70    4.40
 -10  13  -2   13.30    4.90
 -10  13  -2    4.40    5.60
 -10  13  -2    4.90    4.70
 -10  13  -2    3.30    4.10
 -11  13  -2   -1.50    4.10
 -11  13  -2   -0.40    4.60
 -11  13  -2   -3.90    5.30
 -11  13  -2   -1.60    4.90
 -12  13  -2   11.90    4.90
 -12  13  -2    1.20    4.60
 -12  13  -2    8.90    5.40
 -12  13  -2    8.50    4.20
 -13  13  -2   -5.20    4.30
 -13  13  -2    3.50    4.60
 -13  13  -2   -9.80    4.40
 -13  13  -2    1.20    4.70
 -14  13  -2   12.50    4.40
 -14  13  -2    9.00    4.20
 -14  13  -2   17.40    4.20
  12  12  -2    4.20    3.30
  12  12  -2   -0.10    2.80
 -12 -12   2    2.40    4.20
 -12 -12   2    1.10    3.70
  11  12  -2   13.50    3.30
  11  12  -2   17.30    3.90
 -11 -12   2   15.90    4.20
 -11 -12   2   16.20    4.50
  10  12  -2   29.10    4.40
  10  12  -2   17.00    3.60
 -10 -12   2   20.80    4.50
 -10 -12   2   29.80    5.10
   9  12  -2   24.80    4.40
   9  12  -2   18.40    3.60
  -9 -12   2   27.40    4.80
  -9 -12   2   19.00    4.90
   8  12  -2    8.60    3.80
   8  12  -2    7.90    3.40
   8  12  -2   16.30    4.30
  -8 -12   2    3.10    4.40
  -8 -12   2    4.50    4.40
   7  12  -2   24.80    4.00
   7  12  -2   23.20    3.80
   7  12  -2   21.60    3.40
  -7 -12   2   22.10    4.60
  -7 -12   2   22.60    4.20
   6  12  -2   82.29    6.70
   6  12  -2   85.09    6.10
  -6 -12   2   87.99    6.50
  -6 -12   2   91.19    7.80
   5  12  -2    3.30    3.10
   5  12  -2    2.10    3.00
   5  12  -2    7.30    4.00
  -5 -12   2   -2.70    3.20
  -5 -12   2    4.90    6.80
  -5 -12   2    4.10    4.30
   4  12  -2   -1.40    2.80
   4  12  -2    6.50    4.10
   4  12  -2   -3.10    3.00
  -4 -12   2    1.80    3.60
  -4 -12   2    3.20    2.90
  -4 -12   2   -1.00    6.70
   3  12  -2   44.20    4.80
   3  12  -2   52.29    4.40
   3  12  -2   53.19    6.80
  -3 -12   2   56.09    5.70
  -3 -12   2   39.30    7.60
  -3 -12   2   42.40    4.60
   2  12  -2   66.59    6.90
   2  12  -2   56.49    4.60
   2  12  -2   56.99    4.30
   2  12  -2   50.69    4.80
  -2 -12   2   52.99    5.00
  -2 -12   2   63.49    9.30
  -2 -12   2   59.09    6.30
   1  12  -2    6.00    3.50
   1  12  -2   13.50    2.70
   1  12  -2   11.10    2.80
   1  12  -2   11.30    2.50
  -1 -12   2   13.90    6.60
  -1 -12   2    7.70    2.80
  -1 -12   2    9.00    3.70
   0  12  -2   41.30    5.20
   0  12  -2   48.20    4.10
   0  12  -2   44.30    4.20
   0  12  -2   48.30    5.40
   0  12  -2   49.30    4.10
   0  12  -2   56.99    8.60
   0 -12   2   50.09    5.10
   0 -12   2   57.89    8.50
  -1  12  -2    0.60    5.50
  -1  12  -2   -2.40    3.20
  -1  12  -2    0.60    2.40
  -1  12  -2    0.70    3.10
  -1  12  -2   -4.00    2.20
  -1  12  -2   -0.70    2.00
  -1  12  -2   -2.60    2.60
   1 -12   2   -0.90    3.10
   1 -12   2    0.00    6.10
  -2  12  -2   31.50    5.40
  -2  12  -2   26.70    3.10
  -2  12  -2   19.90    3.10
  -2  12  -2   23.40    7.20
  -2  12  -2   29.20    4.10
  -2  12  -2   20.60    2.90
  -2  12  -2   17.30    2.90
   2 -12   2   14.10    6.90
   2 -12   2   24.00    3.80
  -3  12  -2    9.40    3.40
  -3  12  -2   11.10    6.70
  -3  12  -2    4.60    2.90
  -3  12  -2    4.20    3.20
  -3  12  -2    6.00    2.90
  -3  12  -2    5.00    2.80
  -3  12  -2   11.40    2.60
  -3  12  -2   10.10    4.00
   3 -12   2   -4.70    5.90
  -4  12  -2    8.50    3.90
  -4  12  -2   11.60    3.40
  -4  12  -2    6.70    2.90
  -4  12  -2    3.60    2.90
  -4  12  -2    8.10    6.90
  -4  12  -2    6.70    3.60
  -4  12  -2    6.60    2.80
  -4  12  -2   11.00    2.90
   4 -12   2   10.70    7.50
  -5  12  -2    3.30    3.70
  -5  12  -2    2.20    2.40
  -5  12  -2    6.90    3.20
  -5  12  -2   10.20    7.40
  -5  12  -2    5.00    3.80
  -5  12  -2    6.50    3.10
  -5  12  -2    0.00    2.80
  -5  12  -2    1.50    3.20
   5 -12   2    0.00    7.10
  -6  12  -2   86.89    6.80
  -6  12  -2   79.79    6.30
  -6  12  -2   75.59   11.30
  -6  12  -2   79.19    5.70
  -6  12  -2   81.19    7.00
  -6  12  -2   83.39    5.90
  -6  12  -2   79.99    8.20
   6 -12   2   73.09   11.90
  -7  12  -2   14.10    4.50
  -7  12  -2    6.50    3.70
  -7  12  -2   21.80    7.70
  -7  12  -2    6.90    3.90
  -7  12  -2    9.80    3.50
  -7  12  -2    9.70    3.10
   7 -12   2    4.30    9.20
  -8  12  -2   20.40    5.10
  -8  12  -2   21.70    4.20
  -8  12  -2   26.90    9.60
  -8  12  -2   16.40    4.30
  -8  12  -2   27.30    3.80
  -8  12  -2   15.10    4.10
   8 -12   2   -6.10   10.30
  -9  12  -2    2.70    4.70
  -9  12  -2   -1.80    3.80
  -9  12  -2    0.80    4.10
  -9  12  -2   -4.70    3.90
  -9  12  -2    3.00    4.70
   9 -12   2   -4.10    9.20
 -10  12  -2    1.60    5.30
 -10  12  -2   -2.20    4.80
 -10  12  -2    5.60    4.40
 -10  12  -2    0.70    4.20
 -11  12  -2    3.40    4.60
 -11  12  -2   -1.70    4.70
 -11  12  -2    4.10    4.60
 -11  12  -2    9.80    4.50
 -12  12  -2   -1.60    4.70
 -12  12  -2   -0.70    4.20
 -12  12  -2   -0.50    4.70
 -12  12  -2   -3.20    5.00
 -13  12  -2   -1.60    4.40
 -13  12  -2   -5.00    4.40
 -13  12  -2    1.20    4.50
 -13  12  -2   -1.00    4.40
 -14  12  -2    1.90    4.30
 -14  12  -2    4.70    4.10
 -14  12  -2    1.40    4.30
  13  11  -2    7.90    2.90
  13  11  -2    4.30    3.10
 -13 -11   2    2.40    3.70
  12  11  -2    9.80    5.80
  12  11  -2   12.70    3.40
  12  11  -2    6.40    3.70
 -12 -11   2    8.50    4.20
 -12 -11   2    9.10    4.00
  11  11  -2    6.50    3.40
  11  11  -2    2.50    3.80
  11  11  -2    9.40    5.90
 -11 -11   2    4.80    4.40
 -11 -11   2    7.10    4.30
  10  11  -2   23.10    6.20
  10  11  -2   31.90    4.60
  10  11  -2   40.20    5.90
 -10 -11   2   16.40    5.00
 -10 -11   2   31.50    5.00
   9  11  -2    1.60    3.50
   9  11  -2    4.50    5.60
   9  11  -2    1.50    4.20
  -9 -11   2    1.80    4.60
  -9 -11   2   -3.60    4.20
   8  11  -2  156.68    8.40
   8  11  -2  145.59    7.90
  -8 -11   2  100.79   14.40
  -8 -11   2  156.08    8.80
  -8 -11   2  155.38    9.80
   7  11  -2   -3.00    3.00
   7  11  -2    0.40    3.60
   7  11  -2   -3.30    3.30
  -7 -11   2   -2.90    3.40
  -7 -11   2   -5.40    6.80
  -7 -11   2   -3.60    4.20
   6  11  -2   34.30    3.70
   6  11  -2   34.40    4.60
   6  11  -2   38.10    4.50
  -6 -11   2   36.70    5.60
  -6 -11   2   48.90    8.20
  -6 -11   2   33.20    4.80
   5  11  -2   82.69    5.10
   5  11  -2   80.99    7.10
   5  11  -2   75.39    5.70
  -5 -11   2   74.49   10.40
  -5 -11   2   73.49    7.10
  -5 -11   2   77.09    5.80
   4  11  -2   37.90    6.00
   4  11  -2   33.50    3.80
   4  11  -2   33.10    3.90
  -4 -11   2   27.30    7.10
  -4 -11   2   37.00    5.00
  -4 -11   2   38.20    4.10
   3  11  -2  109.59    6.10
   3  11  -2   95.19    5.90
   3  11  -2   88.59    6.80
  -3 -11   2  101.69    6.00
  -3 -11   2   88.09    7.10
  -3 -11   2   91.49   10.20
   2  11  -2    1.10    2.10
   2  11  -2   -0.30    2.20
   2  11  -2    1.00    2.50
   2  11  -2   -0.10    3.00
  -2 -11   2   -1.50    5.00
  -2 -11   2    2.50    3.10
  -2 -11   2    5.10    2.80
   1  11  -2   28.00    3.80
   1  11  -2   24.50    3.80
   1  11  -2   27.50    3.30
   1  11  -2   28.20    3.40
   1  11  -2   21.50    5.30
  -1 -11   2   22.70    6.10
  -1 -11   2   33.50    3.80
   0  11  -2   38.30    3.50
   0  11  -2   37.20    5.80
   0  11  -2   30.10    3.40
   0  11  -2   27.10    3.70
   0  11  -2   35.20    5.10
   0  11  -2   29.70    5.90
   0  11  -2   24.90    3.50
   0  11  -2   31.30    3.20
   0 -11   2   25.30    4.00
   0 -11   2   24.70    5.90
  -1  11  -2   -3.30    3.20
  -1  11  -2    3.90    2.40
  -1  11  -2    0.80    2.10
  -1  11  -2    0.00    2.90
  -1  11  -2    0.40    5.20
  -1  11  -2   -2.10    2.30
  -1  11  -2    1.70    2.40
   1 -11   2    5.20    5.70
   1 -11   2   -0.40    2.80
  -2  11  -2    6.00    2.40
  -2  11  -2    6.50    2.40
  -2  11  -2    5.10    2.60
  -2  11  -2    9.30    5.30
  -2  11  -2   -0.20    2.60
  -2  11  -2    4.60    3.20
  -2  11  -2    1.10    3.00
   2 -11   2    3.00    5.30
  -3  11  -2  184.28    9.70
  -3  11  -2  188.08    9.00
  -3  11  -2  178.48    9.20
  -3  11  -2  195.98    9.20
  -3  11  -2  189.88   10.10
  -3  11  -2  176.48   12.60
  -3  11  -2  198.38   10.40
  -3  11  -2  192.28    9.40
   3 -11   2  189.48   13.40
  -4  11  -2  107.89   10.30
  -4  11  -2  102.09    7.00
  -4  11  -2  108.89    6.10
  -4  11  -2  116.59    6.40
  -4  11  -2  112.69    6.50
  -4  11  -2  104.39    6.50
  -4  11  -2  113.49    6.30
  -4  11  -2  105.69    7.90
   4 -11   2   94.99   12.20
  -5  11  -2  111.29    7.30
  -5  11  -2   94.99   10.10
  -5  11  -2   96.39    5.90
  -5  11  -2  106.59    6.50
  -5  11  -2  100.69    6.30
  -5  11  -2  113.79    6.20
  -5  11  -2  100.59    6.50
  -5  11  -2  100.89    7.10
   5 -11   2   91.79   12.60
  -6  11  -2   24.40    3.90
  -6  11  -2   22.10    7.50
  -6  11  -2   28.30    4.60
  -6  11  -2   27.50    4.30
  -6  11  -2   25.10    3.30
  -6  11  -2   20.80    3.70
  -6  11  -2   21.10    3.30
   6 -11   2   29.80    9.30
  -7  11  -2   -5.10    3.10
  -7  11  -2   -1.50    3.20
  -7  11  -2    0.80    3.70
  -7  11  -2   -0.90    3.00
  -7  11  -2   -6.30    6.60
  -7  11  -2    1.70    2.70
   7 -11   2   -6.40    7.80
  -8  11  -2   24.90    3.90
  -8  11  -2   23.40    4.00
  -8  11  -2   39.00    4.20
  -8  11  -2   25.10    4.50
  -8  11  -2   20.40    8.20
  -8  11  -2   21.30    3.90
   8 -11   2   21.50    9.00
  -9  11  -2   18.60    4.10
  -9  11  -2   20.20    4.00
  -9  11  -2   18.40    4.80
  -9  11  -2   23.10    4.60
  -9  11  -2   26.50    3.90
  -9  11  -2   24.30    9.00
   9 -11   2   13.10    9.80
 -10  11  -2  150.78    8.80
 -10  11  -2  149.39    9.60
 -10  11  -2  146.89    8.80
 -10  11  -2  171.88    9.70
  10 -11   2  109.59   15.60
 -11  11  -2   38.40    6.60
 -11  11  -2   40.90    6.20
 -11  11  -2   45.20    6.40
 -11  11  -2   28.10    5.00
 -12  11  -2   16.20    5.50
 -12  11  -2   10.40    4.20
 -12  11  -2   19.90    4.80
 -12  11  -2    2.30    4.50
 -13  11  -2   -1.80    4.50
 -13  11  -2   -4.70    4.50
 -13  11  -2   -5.50    4.90
 -13  11  -2    2.20    4.40
 -14  11  -2   -2.00    4.50
 -14  11  -2   -6.90    4.10
 -14  11  -2   -0.10    4.50
 -15  11  -2    0.50    3.90
 -15  11  -2    3.10    3.90
 -15  11  -2    0.70    3.90
  13  10  -2   15.50    8.10
  13  10  -2    3.10    3.50
  13  10  -2    2.80    3.30
 -13 -10   2    5.70    4.10
 -13 -10   2    8.00    3.90
  12  10  -2    8.10    3.50
  12  10  -2   -2.00    6.30
  12  10  -2    8.80    4.00
 -12 -10   2    4.90    4.50
 -12 -10   2    5.20    4.50
  11  10  -2    7.30    4.10
  11  10  -2   -3.00    6.20
  11  10  -2   11.10    3.90
 -11 -10   2   10.20    4.70
 -11 -10   2    3.30    4.50
  10  10  -2   24.70    6.20
  10  10  -2   17.30    4.00
  10  10  -2   30.50    4.70
 -10 -10   2   20.10    4.40
 -10 -10   2   25.00    5.30
   9  10  -2   57.09    5.40
   9  10  -2   58.29    6.10
   9  10  -2   50.89    7.80
  -9 -10   2   48.00    6.40
  -9 -10   2   44.80    7.00
   8  10  -2    0.50    3.60
   8  10  -2    0.20    2.70
   8  10  -2    6.60    4.40
  -8 -10   2    2.30    3.90
  -8 -10   2   -0.80    6.60
  -8 -10   2   -1.30    4.30
   7  10  -2    5.80    2.60
   7  10  -2   10.60    3.50
   7  10  -2    9.40    4.20
   7  10  -2    8.60    3.10
  -7 -10   2    8.30    3.30
  -7 -10   2    6.60    6.80
  -7 -10   2    0.60    3.60
   6  10  -2    9.60    3.10
   6  10  -2    4.80    2.50
   6  10  -2    7.20    2.60
   6  10  -2    0.30    4.50
  -6 -10   2   14.80    6.40
  -6 -10   2    8.40    3.70
  -6 -10   2    4.50    2.90
   5  10  -2   -0.20    2.60
   5  10  -2    2.10    2.90
   5  10  -2    1.50    2.50
   5  10  -2    0.90    2.30
  -5 -10   2   -1.70    5.30
  -5 -10   2    2.80    3.00
  -5 -10   2   -0.80    3.20
   4  10  -2    0.60    2.90
   4  10  -2   -2.50    2.30
   4  10  -2    0.10    2.50
  -4 -10   2    2.30    2.90
  -4 -10   2    0.90    2.30
  -4 -10   2    0.50    4.90
   3  10  -2   50.69    3.90
   3  10  -2   45.10    3.90
   3  10  -2   54.29    5.10
  -3 -10   2   51.79    5.00
  -3 -10   2   48.40    4.30
  -3 -10   2   51.59    7.50
   2  10  -2  277.07   12.40
   2  10  -2  273.77   13.10
   2  10  -2  261.67   12.40
   2  10  -2  277.57   12.30
  -2 -10   2  288.57   12.60
  -2 -10   2  249.18   12.80
   1  10  -2  193.18    9.50
   1  10  -2  205.98   10.30
   1  10  -2  206.78   11.90
   1  10  -2  181.98    9.90
   1  10  -2  209.98    9.50
  -1 -10   2  197.18    9.60
  -1 -10   2  217.68   13.20
   0  10  -2  377.26   17.40
   0  10  -2  371.66   17.70
   0  10  -2  373.36   17.00
   0  10  -2  388.86   17.00
   0  10  -2  410.86   19.50
   0 -10   2  389.36   20.00
   0 -10   2  388.46   17.20
  -1  10  -2   64.69    7.80
  -1  10  -2   69.99    6.00
  -1  10  -2   63.49    4.20
  -1  10  -2   71.49    4.70
  -1  10  -2   69.29    5.20
   1 -10   2   61.09    7.90
   1 -10   2   57.89    4.90
  -2  10  -2    9.10    2.50
  -2  10  -2   15.50    3.30
  -2  10  -2   10.90    2.50
  -2  10  -2    8.90    3.00
  -2  10  -2   12.80    5.10
  -2  10  -2   12.40    2.40
  -2  10  -2   11.60    2.50
   2 -10   2   10.90    5.20
  -3  10  -2   82.19    5.10
  -3  10  -2   82.29    8.30
  -3  10  -2   69.09    5.40
  -3  10  -2   75.29    6.30
  -3  10  -2   84.09    5.20
  -3  10  -2   80.39    5.20
  -3  10  -2   86.99    6.60
  -3  10  -2   75.29    5.00
   3 -10   2   91.49    9.50
  -4  10  -2    0.10    2.20
  -4  10  -2   -2.10    3.30
  -4  10  -2    5.00    3.10
  -4  10  -2   -1.40    2.50
  -4  10  -2    1.80    3.00
  -4  10  -2    4.10    2.80
  -4  10  -2    5.30    5.10
  -4  10  -2    7.00    2.50
   4 -10   2    6.90    5.70
  -5  10  -2   46.50    4.30
  -5  10  -2   40.50    5.10
  -5  10  -2   49.20    7.70
  -5  10  -2   46.40    5.10
  -5  10  -2   47.30    4.40
  -5  10  -2   43.40    4.10
  -5  10  -2   47.40    4.90
   5 -10   2   48.20    8.80
  -6  10  -2   57.09    4.90
  -6  10  -2   56.89    6.00
  -6  10  -2   53.39    4.50
  -6  10  -2   57.49    5.50
  -6  10  -2   63.89    5.50
  -6  10  -2   64.39    8.60
  -6  10  -2   61.39    4.90
   6 -10   2   40.90    8.30
  -7  10  -2  115.19   11.60
  -7  10  -2  139.79    7.70
  -7  10  -2  126.59    8.40
  -7  10  -2  141.79    8.10
  -7  10  -2  141.39    7.50
  -7  10  -2  130.09    7.50
  -7  10  -2  131.39    7.20
   7 -10   2  124.69   13.90
  -8  10  -2    4.30    3.20
  -8  10  -2    0.60    3.10
  -8  10  -2    3.70    7.20
  -8  10  -2    3.30    3.30
  -8  10  -2   -0.80    3.60
  -8  10  -2    3.30    2.80
   8 -10   2    4.30    7.70
  -9  10  -2    9.80    4.00
  -9  10  -2    3.50    3.80
  -9  10  -2    5.20    4.70
  -9  10  -2   11.40    8.50
  -9  10  -2    9.70    4.10
   9 -10   2   10.10    9.90
 -10  10  -2   26.40    5.10
 -10  10  -2   37.90    5.90
 -10  10  -2   34.20    4.70
 -10  10  -2   31.30    9.50
 -10  10  -2   30.90    5.20
  10 -10   2   32.30   10.40
 -11  10  -2   14.40    4.50
 -11  10  -2   19.80    5.00
 -11  10  -2   14.60    4.60
 -11  10  -2   16.50    5.00
 -12  10  -2   20.90    5.60
 -12  10  -2   29.20    5.30
 -12  10  -2   21.00    4.50
 -12  10  -2   25.90    4.90
  12 -10   2   33.10    4.40
 -13  10  -2   22.90    4.80
 -13  10  -2   30.20    4.90
 -13  10  -2   15.00    5.10
 -13  10  -2   21.20    4.80
  13 -10   2   18.80    4.00
 -14  10  -2    3.20    4.90
 -14  10  -2   -5.00    4.50
 -14  10  -2    2.60    4.20
  14 -10   2    5.30    3.50
 -15  10  -2    3.30    4.20
 -15  10  -2    1.70    3.90
 -15  10  -2   -1.00    4.30
  14   9  -2   -2.00    3.30
  14   9  -2    1.70    3.10
 -14  -9   2    7.80    4.00
 -14  -9   2    5.40    5.90
  13   9  -2   11.40    3.80
  13   9  -2    8.20    6.50
  13   9  -2   20.60    3.80
 -13  -9   2   14.40    4.50
 -13  -9   2   11.50    4.40
  12   9  -2   39.30    5.60
  12   9  -2   36.10    5.30
  12   9  -2   50.79    7.70
 -12  -9   2   46.60    6.40
 -12  -9   2   39.30    7.10
 -12  -9   2   38.50    4.50
  11   9  -2   50.99    9.10
  11   9  -2   38.00    4.70
  11   9  -2   50.59    5.80
 -11  -9   2   28.90    5.20
 -11  -9   2   35.90    5.20
 -11  -9   2   51.39    5.90
  10   9  -2   -2.50    3.20
  10   9  -2   -0.20    5.70
  10   9  -2    2.90    4.00
 -10  -9   2    3.90    4.00
 -10  -9   2   -3.80    4.30
   9   9  -2   14.90    3.90
   9   9  -2   16.80    3.40
   9   9  -2   15.60    5.40
  -9  -9   2    8.60    4.00
  -9  -9   2   21.30    8.70
  -9  -9   2   14.50    4.30
   8   9  -2    4.50    4.30
   8   9  -2   -2.60    3.10
   8   9  -2    9.20    3.50
  -8  -9   2    2.50    3.30
  -8  -9   2   -5.70    3.80
  -8  -9   2   -9.90    6.80
   7   9  -2   19.20    3.00
   7   9  -2   24.50    4.30
   7   9  -2   21.70    3.20
   7   9  -2   23.50    3.30
  -7  -9   2   26.40    4.20
  -7  -9   2   19.10    3.90
  -7  -9   2   23.00    6.70
   6   9  -2    0.10    3.10
   6   9  -2   -4.00    2.50
   6   9  -2   -0.40    2.20
  -6  -9   2   -3.40    2.80
  -6  -9   2    2.70    5.10
  -6  -9   2    1.20    2.80
   5   9  -2    2.00    2.20
   5   9  -2   -0.40    2.60
   5   9  -2    2.50    2.60
   5   9  -2    2.80    2.90
  -5  -9   2    2.30    5.00
  -5  -9   2    1.70    2.50
  -5  -9   2    2.80    3.00
   4   9  -2   -0.30    2.80
   4   9  -2   -2.90    2.40
   4   9  -2   -2.90    2.00
  -4  -9   2   -1.50    2.00
  -4  -9   2    4.60    4.90
  -4  -9   2    3.80    2.60
   3   9  -2   62.09    3.90
   3   9  -2   46.20    4.00
   3   9  -2   62.39    4.90
  -3  -9   2   54.49    4.30
  -3  -9   2   54.39    7.00
   2   9  -2   49.80    5.20
   2   9  -2   64.89    6.00
  -2  -9   2   65.19    5.50
  -2  -9   2   55.99    7.20
   1   9  -2    5.90    3.90
   1   9  -2    7.20    2.80
  -1  -9   2    4.10    4.20
   0   9  -2  316.57   14.90
   0   9  -2  333.37   16.60
   0  -9   2  318.07   17.30
  -1   9  -2 1099.79   49.80
  -1   9  -2 1132.29   48.30
   1  -9   2 1119.59   50.29
  -2   9  -2   27.60    4.00
  -2   9  -2   25.10    5.00
   2  -9   2   32.00    6.40
  -3   9  -2   20.50    3.20
  -3   9  -2   25.30    5.80
   3  -9   2   22.40    5.60
  -4   9  -2   -1.00    3.00
  -4   9  -2    1.30    2.50
  -4   9  -2   -1.20    4.60
  -4   9  -2    4.20    2.30
  -4   9  -2   -1.80    2.20
   4  -9   2    3.00    5.40
  -5   9  -2   44.90    4.70
  -5   9  -2   37.90    4.00
  -5   9  -2   36.20    3.90
  -5   9  -2   42.10    7.20
  -5   9  -2   42.20    4.40
  -5   9  -2   38.50    4.90
  -5   9  -2   37.50    3.80
   5  -9   2   36.00    6.90
  -6   9  -2   79.19    8.80
  -6   9  -2   88.39    5.50
  -6   9  -2   87.49    5.20
  -6   9  -2   82.69    5.90
  -6   9  -2   83.29    5.80
  -6   9  -2   85.99    6.30
  -6   9  -2   87.69    5.50
   6  -9   2   89.19   10.90
  -7   9  -2    0.20    2.70
  -7   9  -2   -3.90    3.10
  -7   9  -2    5.90    5.90
  -7   9  -2   -1.40    2.60
  -7   9  -2   -6.00    2.50
  -7   9  -2    0.30    3.20
   7  -9   2   -3.90    6.20
  -8   9  -2   55.49    5.20
  -8   9  -2   51.99    5.30
  -8   9  -2   55.99    5.00
  -8   9  -2   53.69    4.70
  -8   9  -2   43.10    8.50
  -8   9  -2   59.29    5.80
   8  -9   2   69.89   12.00
  -9   9  -2   51.49    6.10
  -9   9  -2   60.99    5.10
  -9   9  -2   49.30    9.50
  -9   9  -2   64.89    6.40
  -9   9  -2   62.19    5.40
   9  -9   2   56.69   11.10
 -10   9  -2    0.90    3.90
 -10   9  -2    6.90    3.90
 -10   9  -2    8.30    3.40
 -10   9  -2    0.50    8.50
 -10   9  -2    2.80    4.60
 -10   9  -2    5.10    2.60
  10  -9   2   -4.70    8.80
 -11   9  -2   26.20    5.10
 -11   9  -2   34.40    5.70
 -11   9  -2   37.50    5.90
 -11   9  -2   42.70    6.00
 -11   9  -2   37.10    4.60
  11  -9   2   14.30   10.40
 -12   9  -2    9.00    4.40
 -12   9  -2    4.00    3.80
 -12   9  -2    8.90    4.90
 -12   9  -2    3.80    4.40
 -13   9  -2   36.30    5.40
 -13   9  -2   35.60    5.70
 -13   9  -2   33.10    5.60
 -14   9  -2   49.40    7.40
 -14   9  -2   61.39    7.60
 -14   9  -2   56.79    5.40
  14  -9   2   52.69    5.70
 -15   9  -2   -5.50    4.50
 -15   9  -2   -1.10    3.90
 -15   9  -2    1.00    4.30
  15  -9   2    1.30    3.30
 -16   9  -2    4.10    3.60
 -16   9  -2   -1.70    3.70
 -16   9  -2    4.30    3.60
  16  -9   2    1.80    2.90
  14   8  -2    6.20    3.20
  14   8  -2    1.40    6.20
 -14  -8   2   11.80    4.30
 -14  -8   2    9.30    4.10
  13   8  -2    2.70    3.90
  13   8  -2   -7.50    6.40
  13   8  -2   -4.80    3.80
 -13  -8   2    0.10    3.70
 -13  -8   2   -3.90    4.40
 -13  -8   2   -0.10    4.60
  12   8  -2   17.90    6.70
  12   8  -2   21.60    4.60
  12   8  -2   16.30    4.30
 -12  -8   2   22.10    5.30
 -12  -8   2   20.90    4.90
 -12  -8   2    3.40    3.80
  11   8  -2    2.40    3.50
  11   8  -2    2.10    6.10
  11   8  -2    3.50    4.20
 -11  -8   2    9.70    5.00
 -11  -8   2    0.20    3.40
 -11  -8   2    6.10    4.30
  10   8  -2    4.50    5.60
  10   8  -2   -1.80    3.10
  10   8  -2    2.70    3.80
 -10  -8   2   -0.40    4.70
 -10  -8   2    7.30    4.30
 -10  -8   2    1.40    3.20
 -10  -8   2    5.30    7.10
   9   8  -2   10.80    3.70
   9   8  -2    5.50    4.70
   9   8  -2   11.90    3.20
  -9  -8   2    1.00    7.30
  -9  -8   2   11.20    3.00
  -9  -8   2    8.10    4.30
  -9  -8   2    8.80    3.60
   8   8  -2   -2.00    3.00
   8   8  -2    1.10    4.10
  -8  -8   2    1.50    3.60
  -8  -8   2   -2.00    3.00
  -8  -8   2   -0.90    2.30
  -8  -8   2   -9.50    6.20
   7   8  -2   -2.60    2.30
   7   8  -2    4.90    2.60
   7   8  -2   -1.60    3.50
  -7  -8   2    3.40    3.00
  -7  -8   2    1.10    2.70
  -7  -8   2   -0.60    5.10
  -7  -8   2    5.90    2.90
   6   8  -2  343.87   16.00
   6   8  -2  333.57   15.10
   6   8  -2  342.37   15.30
  -6  -8   2  338.77   15.60
  -6  -8   2  339.17   15.30
  -6  -8   2  344.87   15.40
  -6  -8   2  326.07   18.50
   5   8  -2   34.20    4.50
   5   8  -2   35.90    4.00
   5   8  -2   38.30    3.70
   5   8  -2   36.40    3.20
  -5  -8   2   27.80    5.70
  -5  -8   2   41.60    3.40
  -5  -8   2   31.90    3.80
  -5  -8   2   35.20    4.50
   4   8  -2   34.50    4.00
   4   8  -2   36.20    4.00
   4   8  -2   33.20    3.70
  -4  -8   2   32.70    3.30
  -4  -8   2   36.50    6.20
   3   8  -2   60.19    5.10
  -3  -8   2   58.69    6.90
   2   8  -2    1.50    3.10
   2   8  -2    0.20    2.30
  -2  -8   2   -0.90    4.30
   1   8  -2   61.49    4.80
   1   8  -2   56.69    5.90
  -1  -8   2   69.79    6.70
   0   8  -2   72.99    5.00
   0   8  -2   64.29    6.60
   0  -8   2   64.69    7.60
  -1   8  -2    7.40    2.40
  -1   8  -2    5.30    4.20
   1  -8   2    3.80    4.10
  -2   8  -2  484.65   22.30
  -2   8  -2  424.66   20.50
   2  -8   2  483.05   23.10
  -3   8  -2   33.20    4.30
  -3   8  -2   21.40    5.00
   3  -8   2   24.30    6.20
  -4   8  -2  252.97   12.40
  -4   8  -2  257.27   14.50
   4  -8   2  278.87   15.20
  -5   8  -2  223.78   11.20
  -5   8  -2  238.38   13.80
   5  -8   2  246.78   14.50
  -6   8  -2   30.00    4.20
  -6   8  -2   31.10    6.20
  -6   8  -2   26.40    4.60
  -6   8  -2   30.20    4.00
  -6   8  -2   34.20    3.70
  -6   8  -2   41.40    3.70
   6  -8   2   27.40    6.60
  -7   8  -2    2.80    2.50
  -7   8  -2    4.60    2.40
  -7   8  -2    2.10    3.20
  -7   8  -2    1.20    2.70
  -7   8  -2    1.50    2.20
  -7   8  -2   -4.90    5.30
   7  -8   2    4.50    6.00
  -8   8  -2   63.09    5.50
  -8   8  -2   49.10    5.50
  -8   8  -2   44.50    4.20
  -8   8  -2   50.29    4.60
  -8   8  -2   59.99    5.20
  -8   8  -2   51.99    9.40
   8  -8   2   40.70    8.40
  -9   8  -2   10.10    3.10
  -9   8  -2    7.10    3.40
  -9   8  -2    7.20    3.40
  -9   8  -2   10.00    4.00
  -9   8  -2   15.90    7.20
  -9   8  -2    4.20    2.50
   9  -8   2    2.20    7.80
 -10   8  -2   74.59    6.60
 -10   8  -2   86.89    6.00
 -10   8  -2   82.79    5.70
 -10   8  -2   82.69    6.50
 -10   8  -2   80.79    6.40
 -10   8  -2   98.69   11.80
  10  -8   2   62.29   12.80
 -11   8  -2   30.70    4.70
 -11   8  -2   37.80    4.70
 -11   8  -2   32.30    4.70
 -11   8  -2   23.30    9.50
 -11   8  -2   48.10    6.90
 -11   8  -2   44.20    5.80
  11  -8   2    2.30    9.80
 -12   8  -2   23.30    5.00
 -12   8  -2   29.40    5.00
 -12   8  -2   25.20    4.40
 -12   8  -2   33.20    5.10
 -12   8  -2   26.80    3.80
  12  -8   2   -4.90   14.70
 -13   8  -2   18.40    5.30
 -13   8  -2   19.20    4.20
 -13   8  -2   20.70    5.40
 -13   8  -2   13.40    3.60
 -14   8  -2    0.80    4.60
 -14   8  -2   -1.60    4.80
 -14   8  -2   -4.20    4.20
 -14   8  -2    1.80    3.20
 -15   8  -2   -7.00    4.50
 -15   8  -2    1.60    4.50
 -15   8  -2    5.20    3.90
 -16   8  -2    4.40    4.40
 -16   8  -2    7.50    3.80
 -16   8  -2   -2.80    3.60
  16  -8   2    3.10    3.20
  15   7  -2   -1.00    3.00
 -15  -7   2    2.50    4.50
 -15  -7   2   -4.40    4.00
  14   7  -2   11.30    6.50
  14   7  -2   13.20    3.80
 -14  -7   2   17.20    4.80
 -14  -7   2   14.80    4.00
 -14  -7   2   26.60    5.90
 -14  -7   2   30.50    5.00
  13   7  -2    0.60    3.70
  13   7  -2    2.70    6.30
  13   7  -2    1.10    4.00
 -13  -7   2    4.90    4.90
 -13  -7   2    1.30    4.00
 -13  -7   2   -2.00    3.30
 -13  -7   2   -2.20    4.00
  12   7  -2   21.40    4.00
  12   7  -2   41.90    5.90
  12   7  -2   27.30    7.00
 -12  -7   2   16.30    4.10
 -12  -7   2   15.10    5.10
 -12  -7   2   30.60    4.90
 -12  -7   2   23.20    5.10
  11   7  -2   56.59    5.20
  11   7  -2   50.99    7.90
  11   7  -2   48.40    5.90
 -11  -7   2   64.19    6.30
 -11  -7   2   66.59    7.30
 -11  -7   2   53.89    5.40
 -11  -7   2   44.90    9.40
 -11  -7   2   51.09    5.80
  10   7  -2    3.70    5.30
  10   7  -2    4.80    3.70
 -10  -7   2    1.50    3.10
 -10  -7   2   10.60    4.20
 -10  -7   2   -0.10    4.60
 -10  -7   2    7.20    3.00
 -10  -7   2    3.10    7.60
   9   7  -2   50.29    6.50
   9   7  -2   56.29    5.20
  -9  -7   2   50.29    5.10
  -9  -7   2   43.20    4.80
  -9  -7   2   48.20    4.30
  -9  -7   2   51.39    6.40
  -9  -7   2   59.49    5.30
  -9  -7   2   44.90    9.00
   8   7  -2    6.20    3.70
   8   7  -2   10.20    2.80
  -8  -7   2   11.50    2.70
  -8  -7   2    2.40    6.50
  -8  -7   2    6.70    3.00
  -8  -7   2   11.10    2.70
  -8  -7   2   16.10    3.00
  -8  -7   2    9.30    3.50
   7   7  -2    6.90    2.70
  -7  -7   2    0.40    2.50
  -7  -7   2   -3.70    2.40
  -7  -7   2    1.30    2.90
  -7  -7   2    2.40    2.20
  -7  -7   2    0.50    5.50
   6   7  -2  118.19    6.50
  -6  -7   2  133.99    6.80
  -6  -7   2  119.59    6.70
  -6  -7   2  126.99    9.60
  -6  -7   2  133.99    7.40
   5   7  -2   40.30    4.20
  -5  -7   2   33.50    4.40
  -5  -7   2   35.40    6.40
   4   7  -2   18.80    2.70
  -4  -7   2   20.80    5.20
  -4  -7   2   21.50    3.80
   3   7  -2   94.29    5.70
   3   7  -2   77.99    5.80
  -3  -7   2   99.79    7.60
   2   7  -2  324.57   15.60
   2   7  -2  324.47   15.00
  -2  -7   2  338.07   16.90
   1   7  -2    0.00    2.20
   1   7  -2   -1.70    3.00
  -1  -7   2    0.50    3.80
   0   7  -2  142.69    8.50
   0   7  -2  131.99    7.10
   0  -7   2  130.09    8.70
  -1   7  -2   32.30    5.10
  -1   7  -2   27.00    3.70
   1  -7   2   28.70    5.80
  -2   7  -2   91.39    5.50
  -2   7  -2  105.39    7.50
   2  -7   2   84.49    8.70
  -3   7  -2  247.28   11.50
  -3   7  -2  235.88   13.60
   3  -7   2  255.87   14.00
  -4   7  -2    1.30    2.40
  -4   7  -2    1.20    4.10
   4  -7   2   11.60    4.90
  -5   7  -2  935.51   44.70
  -5   7  -2 1085.69   46.90
   5  -7   2 1111.09   47.40
  -6   7  -2  130.59   10.10
  -6   7  -2  113.69    6.60
   6  -7   2  131.19   10.50
  -7   7  -2  145.79    7.80
  -7   7  -2  154.38   10.90
  -7   7  -2  141.49    7.50
  -7   7  -2  145.39    7.50
  -7   7  -2  136.49    8.10
   7  -7   2  149.69   11.60
  -8   7  -2    2.90    2.50
  -8   7  -2   -4.50    5.40
  -8   7  -2    4.30    2.60
  -8   7  -2    2.70    2.00
  -8   7  -2   -0.60    2.80
  -8   7  -2    0.60    3.60
   8  -7   2    3.20    6.20
  -9   7  -2  265.27   12.50
  -9   7  -2  274.97   16.70
  -9   7  -2  256.77   12.50
  -9   7  -2  259.17   13.20
  -9   7  -2  283.77   13.00
  -9   7  -2  266.57   12.90
   9  -7   2  279.07   17.80
 -10   7  -2   71.79    5.40
 -10   7  -2   65.89    5.50
 -10   7  -2   73.89    6.40
 -10   7  -2   72.59    5.40
 -10   7  -2   52.89    9.80
 -10   7  -2   68.69    6.50
  10  -7   2   66.29   11.90
 -11   7  -2   -1.50    4.70
 -11   7  -2   12.30    4.10
 -11   7  -2    9.10    3.80
 -11   7  -2    7.00    2.70
 -11   7  -2    0.90    3.90
  11  -7   2   -0.30   10.10
 -12   7  -2    7.20    3.90
 -12   7  -2   -1.00    4.60
 -12   7  -2    2.00    3.20
 -12   7  -2   -1.60    4.50
  12  -7   2    1.20    9.70
 -13   7  -2    3.20    4.30
 -13   7  -2   -0.70    3.40
 -13   7  -2   -6.30    4.90
 -13   7  -2    8.90    4.80
 -14   7  -2   14.70    4.90
 -14   7  -2   11.70    4.10
 -14   7  -2    8.90    5.00
 -14   7  -2   13.60    3.70
 -15   7  -2   31.40    5.10
 -15   7  -2   23.70    5.30
 -15   7  -2   25.20    5.00
 -15   7  -2   23.00    4.20
 -16   7  -2    3.30    3.70
 -16   7  -2   -4.10    4.20
 -16   7  -2    6.90    3.60
  15   6  -2   -0.30    3.20
  15   6  -2   -2.00    5.80
 -15  -6   2   -1.60    4.20
 -15  -6   2    0.90    4.20
 -15  -6   2   -3.40    3.60
 -15  -6   2   -0.90    2.90
  14   6  -2   -6.20    6.30
  14   6  -2   -1.00    3.50
 -14  -6   2   -2.30    3.30
 -14  -6   2   -4.00    4.20
 -14  -6   2   -2.60    4.50
 -14  -6   2    4.80    4.80
  13   6  -2   15.40    4.20
  13   6  -2   20.80    4.20
  13   6  -2   33.30    7.00
 -13  -6   2   11.50    4.70
 -13  -6   2   14.50    3.80
 -13  -6   2   13.00    4.10
 -13  -6   2   17.70    5.20
  12   6  -2    5.80    6.00
  12   6  -2    1.40    4.10
  12   6  -2   15.00    4.20
 -12  -6   2   13.20    4.80
 -12  -6   2    8.50    5.10
 -12  -6   2   10.40    3.70
 -12  -6   2    8.50    4.00
  11   6  -2   44.30    6.60
  11   6  -2   36.40    5.40
 -11  -6   2   22.90    4.60
 -11  -6   2   39.40    6.80
 -11  -6   2   35.50    5.00
 -11  -6   2   13.20    8.00
 -11  -6   2   39.10    5.20
  10   6  -2    2.60    5.00
  10   6  -2   10.80    3.10
 -10  -6   2    4.90    3.50
 -10  -6   2   -0.90    3.80
 -10  -6   2    5.50    3.30
 -10  -6   2    4.70    2.90
 -10  -6   2    1.20    3.90
 -10  -6   2   -9.00    7.30
   9   6  -2   53.39    6.30
   9   6  -2   46.00    5.00
  -9  -6   2   45.90    9.40
  -9  -6   2   49.80    4.90
  -9  -6   2   59.59    5.70
  -9  -6   2   56.89    4.60
  -9  -6   2   60.69    4.90
  -9  -6   2   49.70    4.80
   8   6  -2   -1.40    2.40
  -8  -6   2    4.40    2.60
  -8  -6   2    3.00    2.50
  -8  -6   2   -2.10    2.90
  -8  -6   2    4.10    2.20
  -8  -6   2    1.00    5.20
  -8  -6   2    4.10    3.10
   7   6  -2   17.00    2.70
  -7  -6   2   13.90    3.00
  -7  -6   2   21.00    2.90
  -7  -6   2   14.20    3.00
  -7  -6   2   13.60    2.60
  -7  -6   2   20.80    2.90
  -7  -6   2    9.00    3.60
  -7  -6   2    9.30    5.10
  -6  -6   2   -1.80    2.90
  -6  -6   2    6.90    4.60
   5   6  -2  265.47   12.60
  -5  -6   2  291.27   15.20
  -5  -6   2  270.87   12.80
   4   6  -2   55.89    4.60
  -4  -6   2   63.79    6.60
  -4  -6   2   57.79    4.60
   3   6  -2  527.95   23.80
  -3  -6   2  555.34   25.20
   2   6  -2  581.94   26.00
  -2  -6   2  593.24   26.90
   1   6  -2   12.60    3.00
  -1  -6   2    6.10    3.40
   0   6  -2    7.20    3.20
   0  -6   2   16.80    4.10
  -1   6  -2  343.37   16.80
   1  -6   2  358.06   17.20
  -2   6  -2    0.90    3.30
   2  -6   2    0.10    3.70
  -3   6  -2    3.40    3.60
   3  -6   2    3.00    4.00
  -4   6  -2  267.57   13.90
   4  -6   2  258.67   14.30
  -5   6  -2  126.49    9.10
   5  -6   2  138.69   10.60
  -6   6  -2  115.89    9.20
   6  -6   2  143.79   11.00
  -7   6  -2    3.20    4.90
   7  -6   2    3.50    5.00
  -8   6  -2  457.15   20.00
  -8   6  -2  456.75   19.50
  -8   6  -2  416.56   19.30
  -8   6  -2  464.25   22.70
  -8   6  -2  401.16   19.20
  -8   6  -2  421.56   19.20
   8  -6   2  446.66   23.50
  -9   6  -2    1.90    3.00
  -9   6  -2    6.20    2.60
  -9   6  -2    3.60    3.50
  -9   6  -2    6.30    2.50
  -9   6  -2    1.60    5.60
  -9   6  -2    2.90    2.70
   9  -6   2    7.30    6.70
 -10   6  -2  232.88   11.40
 -10   6  -2  228.68   11.50
 -10   6  -2  241.78   11.70
 -10   6  -2  241.08   11.30
 -10   6  -2  239.78   12.60
 -10   6  -2  251.67   15.60
  10  -6   2  234.28   16.80
 -11   6  -2    0.70    4.20
 -11   6  -2   -0.10    3.70
 -11   6  -2    2.20    2.70
 -11   6  -2   -1.00    3.50
  11  -6   2    2.20    8.30
 -12   6  -2    0.50    3.40
 -12   6  -2    5.20    3.90
 -12   6  -2    3.50    5.00
 -12   6  -2    8.10    4.00
  12  -6   2   -0.70    8.70
 -13   6  -2   69.49    5.60
 -13   6  -2   63.79    7.20
 -13   6  -2   67.69    7.50
 -13   6  -2   53.59    6.50
 -14   6  -2   60.99    5.80
 -14   6  -2   53.09    7.70
 -14   6  -2   62.49    6.70
 -14   6  -2   65.29    7.80
 -15   6  -2   16.80    4.00
 -15   6  -2   15.60    4.50
 -15   6  -2   12.20    5.00
 -15   6  -2   13.70    4.80
 -16   6  -2    4.10    3.80
 -16   6  -2    0.70    4.20
 -16   6  -2   -1.70    3.90
 -16   6  -2    8.00    3.50
  16   5  -2    6.70    2.90
 -16  -5   2    2.90    4.00
 -16  -5   2    3.30    6.50
 -16  -5   2    7.00    2.70
  15   5  -2    1.10    3.40
  15   5  -2   -7.50    6.10
 -15  -5   2    5.60    4.70
 -15  -5   2    4.70    4.50
 -15  -5   2   -5.00    3.20
 -15  -5   2   -2.30    3.80
  14   5  -2    1.60    6.60
  14   5  -2   -3.50    3.40
 -14  -5   2    3.50    4.70
 -14  -5   2   -6.00    4.90
 -14  -5   2   -0.20    4.20
 -14  -5   2    3.40    3.70
  13   5  -2   12.00    4.20
  13   5  -2    7.00    6.30
 -13  -5   2   11.30    5.40
 -13  -5   2   12.50    3.90
 -13  -5   2    2.70    4.00
 -13  -5   2   16.40    4.50
  12   5  -2   55.09    8.20
  12   5  -2   75.49    6.00
 -12  -5   2   70.69   12.10
 -12  -5   2   54.39    6.20
 -12  -5   2   65.59    7.00
 -12  -5   2   62.79    6.10
 -12  -5   2   55.59    7.70
  11   5  -2   16.80    5.10
  11   5  -2   16.30    3.80
 -11  -5   2   11.20    7.60
 -11  -5   2   10.60    3.50
 -11  -5   2   12.40    3.10
 -11  -5   2   10.30    4.20
 -11  -5   2   14.10    4.50
 -11  -5   2   12.40    4.70
  10   5  -2    1.30    3.20
  10   5  -2   -5.00    4.10
 -10  -5   2   -2.60    3.30
 -10  -5   2   -9.40    7.00
 -10  -5   2    2.80    3.10
 -10  -5   2    3.50    3.60
 -10  -5   2   -0.30    2.70
 -10  -5   2    3.50    3.50
   9   5  -2   14.20    3.10
  -9  -5   2    6.30    3.10
  -9  -5   2    2.80    6.10
  -9  -5   2    6.70    2.50
  -9  -5   2    6.90    3.70
  -9  -5   2   10.30    3.00
  -9  -5   2    5.60    2.70
   8   5  -2    6.70    2.40
  -8  -5   2    1.80    3.30
  -8  -5   2    3.90    5.50
  -8  -5   2    7.30    3.00
  -8  -5   2    0.40    2.20
  -8  -5   2    2.40    3.30
  -8  -5   2    3.30    2.60
  -8  -5   2    4.60    2.20
   7   5  -2   -1.00    2.50
  -7  -5   2    3.70    5.00
  -7  -5   2    0.70    2.30
  -7  -5   2    3.70    3.20
  -7  -5   2    0.80    2.40
  -6  -5   2 1378.06   58.39
  -6  -5   2 1343.47   59.99
  -5  -5   2  217.18   10.30
  -5  -5   2  210.18   12.10
  -4  -5   2   21.80    4.40
   3   5  -2   26.40    2.70
  -3  -5   2   27.40    4.90
   2   5  -2  111.79    6.20
  -2  -5   2  114.09    7.40
   1   5  -2  591.84   26.00
  -1  -5   2  581.64   26.50
   0   5  -2  353.76   16.20
   0  -5   2  346.07   16.60
  -1   5  -2  987.60   42.80
   1  -5   2  969.80   43.00
  -2   5  -2  105.79    6.60
   2  -5   2   80.29    6.70
  -3   5  -2    4.00    3.20
   3  -5   2    2.10    3.70
  -4   5  -2  860.51   37.80
   4  -5   2  835.22   38.10
  -5   5  -2   80.09    6.80
   5  -5   2   77.59    7.50
  -6   5  -2  212.68   12.40
   6  -5   2  226.08   13.20
  -7   5  -2  176.38   11.10
   7  -5   2  179.18   12.20
  -8   5  -2  172.88    8.50
  -8   5  -2  167.28    8.90
  -8   5  -2  159.98    8.30
  -8   5  -2  171.88   12.00
  -8   5  -2  177.28    9.10
   8  -5   2  184.78   12.60
  -9   5  -2   -2.70    5.00
  -9   5  -2    3.20    3.10
  -9   5  -2    2.60    2.50
  -9   5  -2   -1.70    2.30
  -9   5  -2   -1.40    3.30
  -9   5  -2    1.60    2.50
  -9   5  -2   -1.80    2.10
   9  -5   2   -0.30    5.80
 -10   5  -2    2.10    3.10
 -10   5  -2    0.10    2.80
 -10   5  -2    0.80    3.70
 -10   5  -2   -8.80    5.60
 -10   5  -2    0.90    2.50
 -10   5  -2   -0.70    2.40
  10  -5   2   11.40    8.00
 -11   5  -2  167.48    9.50
 -11   5  -2  154.28    9.00
 -11   5  -2  163.58    8.50
 -11   5  -2  146.69    8.30
 -11   5  -2  163.78    9.40
  11  -5   2  179.78   16.00
 -12   5  -2   50.99    5.90
 -12   5  -2   44.00    5.40
 -12   5  -2   44.30    5.90
 -12   5  -2   44.90    7.50
  12  -5   2   50.89   11.50
 -13   5  -2    4.40    4.90
 -13   5  -2    8.70    4.80
 -13   5  -2   11.60    3.90
 -13   5  -2    3.10    3.70
  13  -5   2    9.80    4.30
 -14   5  -2   21.80    4.20
 -14   5  -2   20.50    4.00
 -14   5  -2   12.70    5.70
 -14   5  -2   16.10    4.90
  14  -5   2   32.10    4.70
 -15   5  -2   -5.60    4.90
 -15   5  -2    4.30    4.40
 -15   5  -2   11.40    4.60
 -15   5  -2    4.30    3.70
  15  -5   2   14.60    3.90
 -16   5  -2   -2.60    3.40
 -16   5  -2    0.40    3.90
 -16   5  -2   -0.90    3.90
 -16   5  -2   -1.20    4.20
 -17   5  -2   -1.20    3.80
 -17   5  -2   -0.80    3.40
  16   4  -2   -4.60    6.90
  16   4  -2    7.60    3.20
 -16  -4   2    2.20    4.10
 -16  -4   2    6.60    3.10
 -16  -4   2    5.00    3.60
 -16  -4   2    9.10    4.20
  15   4  -2    4.30    3.60
  15   4  -2   20.00    6.80
 -15  -4   2   10.30    4.20
 -15  -4   2    0.10    4.50
 -15  -4   2    4.40    3.50
 -15  -4   2    4.10    5.10
  14   4  -2    2.00    6.70
  14   4  -2    2.70    3.80
 -14  -4   2   -4.60    3.90
 -14  -4   2   -6.30    4.00
 -14  -4   2    0.60    4.90
 -14  -4   2   -3.50    5.20
  13   4  -2    0.70    4.10
  13   4  -2   -5.80    6.50
 -13  -4   2   -0.10    3.70
 -13  -4   2    1.20    5.30
 -13  -4   2    1.20    3.70
 -13  -4   2    4.10    4.80
  12   4  -2   34.30    6.30
  12   4  -2   39.20    5.70
 -12  -4   2   43.20    7.10
 -12  -4   2   30.80    4.30
 -12  -4   2   39.20    5.50
 -12  -4   2   34.70    9.20
 -12  -4   2   34.90    5.40
  11   4  -2    0.40    3.40
  11   4  -2   -0.90    4.70
 -11  -4   2    4.30    3.20
 -11  -4   2   -1.00    3.10
 -11  -4   2   -1.20    3.40
 -11  -4   2    4.90    3.60
 -11  -4   2    7.00    4.50
 -11  -4   2   -7.10    6.60
  10   4  -2   80.59    5.60
 -10  -4   2   63.39   10.00
 -10  -4   2   83.59    5.50
 -10  -4   2   80.29    5.50
 -10  -4   2   78.39    5.60
 -10  -4   2   92.29    6.40
 -10  -4   2   76.69    6.00
   9   4  -2  156.88    7.70
  -9  -4   2  149.09    7.90
  -9  -4   2  139.39    8.20
  -9  -4   2  134.89   11.90
  -9  -4   2  151.28    7.60
  -9  -4   2  134.09    7.50
  -9  -4   2  150.88    7.60
  -9  -4   2  133.29    8.90
   8   4  -2   -0.70    2.60
  -8  -4   2    2.40    2.50
  -8  -4   2    0.80    3.20
  -8  -4   2    1.40    2.30
  -8  -4   2   -2.40    3.00
  -8  -4   2    0.60    2.40
  -8  -4   2   -0.60    2.40
  -8  -4   2   -4.60    4.70
  -7  -4   2    1.00    3.00
  -7  -4   2    3.10    4.30
  -6  -4   2  160.58   10.20
  -6  -4   2  167.48    8.50
  -5  -4   2  146.99    7.70
  -5  -4   2  149.49    9.30
  -4  -4   2   14.40    3.80
   3   4  -2   57.39    3.20
  -3  -4   2   58.39    5.50
   2   4  -2  356.46   16.00
  -2  -4   2  366.36   17.00
   1   4  -2   16.30    2.60
  -1  -4   2   16.00    3.40
   0   4  -2  600.04   26.50
   0  -4   2  602.74   26.90
  -1   4  -2  787.82   34.00
   1  -4   2  764.72   34.30
  -2   4  -2  694.93   31.50
   2  -4   2  736.33   31.80
  -3   4  -2  541.05   24.30
   3  -4   2  532.65   24.60
  -4   4  -2  480.55   22.40
   4  -4   2  489.85   22.90
  -5   4  -2   77.69    6.50
   5  -4   2   77.39    7.30
  -6   4  -2   38.20    5.60
  -7   4  -2  124.09    8.80
  -8   4  -2  166.38    8.30
  -8   4  -2  184.78   11.50
  -8   4  -2  160.28    9.10
  -8   4  -2  171.58   10.20
  -9   4  -2   24.20    3.50
  -9   4  -2   26.10    3.00
  -9   4  -2   26.60    6.20
  -9   4  -2   27.20    3.80
  -9   4  -2   22.30    2.90
  -9   4  -2   22.70    3.90
 -10   4  -2   10.10    2.70
 -10   4  -2    7.80    2.80
 -10   4  -2    7.70    3.80
 -10   4  -2    4.80    3.10
 -10   4  -2    8.90    2.80
 -11   4  -2   13.70    3.60
 -11   4  -2    8.80    4.30
 -11   4  -2   18.20    3.20
 -11   4  -2   10.40    3.90
 -11   4  -2   16.10    3.00
  11  -4   2   20.00    8.60
 -12   4  -2    3.40    4.50
 -12   4  -2    5.40    3.60
 -12   4  -2    7.90    3.30
 -12   4  -2    6.30    3.60
 -12   4  -2    5.00    4.00
  12  -4   2   20.20   10.30
 -13   4  -2    1.30    3.80
 -13   4  -2    3.60    4.50
 -13   4  -2   -1.00    3.70
 -13   4  -2    1.30    4.70
  13  -4   2   20.70   11.00
 -14   4  -2   13.80    5.20
 -14   4  -2    8.70    3.80
 -14   4  -2    2.90    3.90
 -14   4  -2   10.00    4.50
  14  -4   2   15.60    4.50
 -15   4  -2   12.70    5.30
 -15   4  -2   18.90    4.20
 -15   4  -2   23.20    4.50
 -15   4  -2   22.20    4.80
  15  -4   2   28.40    4.50
 -16   4  -2   30.70    4.70
 -16   4  -2   23.20    5.10
 -16   4  -2   29.60    4.50
 -16   4  -2   42.70    5.10
  16  -4   2   45.80    4.90
 -17   4  -2    1.80    3.00
 -17   4  -2    5.20    3.30
 -17   4  -2    0.90    3.70
  17  -4   2   -1.50    3.00
  16   3  -2   41.40    6.90
 -16  -3   2   20.00    4.80
 -16  -3   2   48.40    4.90
 -16  -3   2   41.90    5.80
 -16  -3   2   38.00    5.30
  15   3  -2   40.40    7.10
  15   3  -2   31.50    4.80
 -15  -3   2   26.90    4.50
 -15  -3   2   27.60    5.60
 -15  -3   2   26.00    5.00
 -15  -3   2   34.70    5.80
  14   3  -2   10.70    4.00
  14   3  -2   26.30    7.20
 -14  -3   2   13.60    4.00
 -14  -3   2    6.60    4.60
 -14  -3   2   16.00    5.60
 -14  -3   2   18.90    4.50
  13   3  -2   -3.40    6.00
 -13  -3   2    0.80    3.40
 -13  -3   2   -4.30    4.30
 -13  -3   2    2.30    5.20
 -13  -3   2   -2.10    3.80
  12   3  -2   64.69    9.00
 -12  -3   2   54.19    5.90
 -12  -3   2   68.09   12.10
 -12  -3   2   55.59    6.00
 -12  -3   2   54.39    7.50
 -12  -3   2   72.49    6.00
 -12  -3   2   58.79    5.40
  11   3  -2    5.50    3.20
 -11  -3   2   11.10    7.30
 -11  -3   2    1.00    3.30
 -11  -3   2    3.70    3.70
 -11  -3   2    2.60    3.20
 -11  -3   2    7.20    3.80
 -11  -3   2   -2.00    2.80
  10   3  -2   74.49    5.20
 -10  -3   2   62.09    6.00
 -10  -3   2   74.49    5.20
 -10  -3   2   71.49   10.30
 -10  -3   2   74.89    5.70
 -10  -3   2   76.19    5.60
 -10  -3   2   80.39    5.60
 -10  -3   2   69.29    7.00
   9   3  -2  439.16   20.60
  -9  -3   2  460.85   20.90
  -9  -3   2  450.25   24.00
  -9  -3   2  491.55   20.70
  -9  -3   2  483.45   21.50
  -9  -3   2  454.15   20.60
  -9  -3   2  468.75   20.60
  -9  -3   2  480.45   20.80
  -8  -3   2   11.10    3.20
  -8  -3   2   12.80    2.50
  -8  -3   2   15.70    2.90
  -8  -3   2   11.80    2.40
  -8  -3   2   14.40    2.70
  -8  -3   2    8.80    4.90
  -7  -3   2  119.69    8.80
  -7  -3   2  116.69    6.90
  -6  -3   2   50.69    7.00
  -6  -3   2   48.40    4.90
  -5  -3   2  263.57   13.40
  -4  -3   2   32.00    4.80
  -3  -3   2   74.09    6.20
   2   3  -2 1197.88   50.69
  -2  -3   2 1183.78   51.49
   1   3  -2 2681.13  112.59
  -1  -3   2 2631.94  113.09
   0   3  -2  370.96   16.40
   0  -3   2  365.06   16.80
  -1   3  -2   33.80    3.90
   1  -3   2   35.50    4.20
  -2   3  -2   29.50    3.90
   2  -3   2   36.40    4.50
  -3   3  -2  778.02   35.20
   3  -3   2  830.12   35.50
  -4   3  -2  474.85   21.70
  -5   3  -2   28.80    5.10
  -5   3  -2   37.10    5.00
  -6   3  -2   39.90    5.60
  -6   3  -2   39.60    5.90
  -7   3  -2    2.40    3.80
  -7   3  -2    5.00    3.80
   7  -3   2    4.60    2.50
  -8   3  -2   63.29    7.10
  -8   3  -2   54.79    7.00
   8  -3   2   55.89    5.00
  -9   3  -2   23.10    3.00
  -9   3  -2   20.10    2.90
  -9   3  -2   18.80    3.70
  -9   3  -2   23.70    6.00
  -9   3  -2   19.40    3.20
  -9   3  -2   21.40    5.60
  -9   3  -2   17.40    2.70
   9  -3   2   25.20    4.50
 -10   3  -2   65.89    6.10
 -10   3  -2   72.39    5.00
 -10   3  -2   75.99    5.10
 -10   3  -2   70.59    6.40
 -10   3  -2   60.49    9.60
 -10   3  -2   69.59    5.10
  10  -3   2   75.59    6.20
 -11   3  -2   19.30    3.50
 -11   3  -2   17.90    7.10
 -11   3  -2   17.70    4.50
 -11   3  -2   18.60    3.30
 -11   3  -2   17.20    3.60
 -11   3  -2   15.50    3.20
  11  -3   2   13.60    4.20
 -12   3  -2    1.30    3.50
 -12   3  -2   -3.80    4.60
 -12   3  -2    4.00    3.80
 -12   3  -2    1.90    4.00
 -12   3  -2    3.40    3.00
  12  -3   2    1.70    6.10
 -13   3  -2    0.20    4.10
 -13   3  -2    2.90    4.20
 -13   3  -2   -6.30    5.40
 -13   3  -2    0.10    3.80
  13  -3   2    8.10   10.00
 -14   3  -2    7.50    3.90
 -14   3  -2    0.00    5.00
 -14   3  -2    2.80    4.70
 -14   3  -2    7.70    4.00
  14  -3   2    5.30    4.60
 -15   3  -2   46.00    6.70
 -15   3  -2   34.40    4.90
 -15   3  -2   39.20    6.60
 -15   3  -2   36.40    6.00
  15  -3   2   40.30    5.90
 -16   3  -2    8.10    3.90
 -16   3  -2    8.60    3.50
 -16   3  -2   -1.60    4.70
  16  -3   2   12.20    3.80
 -17   3  -2    4.40    3.90
 -17   3  -2   -3.20    2.90
 -17   3  -2   -2.20    3.60
  17  -3   2   -7.40    3.20
  17   2  -2    4.50    2.50
 -17  -2   2    2.60    3.70
 -17  -2   2    3.50    2.80
 -17  -2   2    8.30    4.00
  16   2  -2   43.40    4.30
  16   2  -2   29.80    6.60
 -16  -2   2   27.60    5.00
 -16  -2   2   33.40    5.40
 -16  -2   2   32.50    4.30
 -16  -2   2   20.20    3.90
  15   2  -2    6.10    3.60
  15   2  -2   14.90    6.80
 -15  -2   2    3.10    4.30
 -15  -2   2    4.50    4.10
 -15  -2   2    7.90    4.00
 -15  -2   2    6.70    5.30
  14   2  -2   20.00    4.30
  14   2  -2   20.10    7.10
 -14  -2   2   20.70    5.70
 -14  -2   2   22.10    4.60
 -14  -2   2   11.50    4.60
 -14  -2   2   13.90    4.30
  13   2  -2   12.40    6.50
 -13  -2   2    6.10    3.50
 -13  -2   2   12.10    4.40
 -13  -2   2   12.60    8.30
 -13  -2   2    9.30    3.60
 -13  -2   2    9.20    5.00
  12   2  -2   34.40    6.00
 -12  -2   2   34.00    4.60
 -12  -2   2   23.00    9.20
 -12  -2   2   39.30    5.40
 -12  -2   2   39.80    5.30
 -12  -2   2   38.20    6.90
 -12  -2   2   29.40    4.50
 -11  -2   2   10.30    7.00
 -11  -2   2   -0.70    3.00
 -11  -2   2    1.50    3.50
 -11  -2   2    0.30    4.10
 -11  -2   2    0.00    2.80
 -11  -2   2    0.90    3.10
  10   2  -2   27.70    4.40
 -10  -2   2   37.90    6.70
 -10  -2   2   28.10    6.80
 -10  -2   2   39.70    4.10
 -10  -2   2   48.10    5.10
 -10  -2   2   39.70    5.00
 -10  -2   2   45.00    4.70
 -10  -2   2   40.20    4.30
  -9  -2   2    5.50    2.40
  -9  -2   2    2.70    2.80
  -9  -2   2    1.80    3.40
  -9  -2   2    2.60    2.40
  -9  -2   2    2.40    5.00
  -9  -2   2    1.70    2.70
  -9  -2   2    3.70    3.30
  -8  -2   2  507.45   24.90
  -8  -2   2  515.95   23.00
  -7  -2   2   85.19    5.70
  -7  -2   2   88.69    7.70
  -6  -2   2   59.59    4.60
  -6  -2   2   53.89    6.20
  -5  -2   2  367.26   17.50
  -4  -2   2    2.20    2.80
  -3  -2   2    4.20    2.90
   2   2  -2 2018.70   87.09
  -2  -2   2 2098.69   87.79
   1   2  -2  904.61   39.30
  -1  -2   2  937.61   39.70
   0   2  -2    9.90    1.70
   0  -2   2    6.00    2.10
  -1   2  -2  169.58    7.90
   1  -2   2  157.38    8.10
  -2   2  -2  441.66   20.00
   2  -2   2  457.95   20.20
  -3   2  -2 7123.79  310.37
  -3   2  -2 7547.84  310.37
  -4   2  -2   60.29    5.10
  -4   2  -2   56.19    4.80
  -5   2  -2   11.20    3.50
  -5   2  -2   13.00    3.60
  -6   2  -2  124.39    8.40
  -6   2  -2  118.49    7.90
  -7   2  -2   81.99    7.50
  -7   2  -2   82.29    7.10
   7  -2   2   84.19    5.40
  -8   2  -2  219.28   13.20
  -8   2  -2  247.88   12.80
   8  -2   2  221.58   11.20
  -9   2  -2    3.60    4.60
  -9   2  -2    5.30    2.60
  -9   2  -2    1.90    3.20
  -9   2  -2    7.10    2.80
  -9   2  -2    6.00    2.30
  -9   2  -2    5.40    2.60
   9  -2   2    3.20    2.70
 -10   2  -2   -1.70    2.80
 -10   2  -2    7.00    5.40
 -10   2  -2    4.00    2.80
 -10   2  -2   -3.20    3.60
 -10   2  -2    4.80    2.80
 -10   2  -2   -2.40    2.40
  10  -2   2    4.60    3.30
 -11   2  -2  115.69    6.90
 -11   2  -2  119.19    7.90
 -11   2  -2  105.39   10.80
 -11   2  -2  110.69    7.20
 -11   2  -2  121.19    7.20
 -11   2  -2  108.69    6.80
  11  -2   2  119.89    8.30
 -12   2  -2   22.10    7.80
 -12   2  -2   17.60    3.70
 -12   2  -2   20.90    4.00
 -12   2  -2   32.40    4.60
 -12   2  -2   19.30    3.60
 -12   2  -2   16.20    5.50
  12  -2   2   29.30    5.30
 -13   2  -2    5.80    3.90
 -13   2  -2    6.00    4.20
 -13   2  -2    3.30    3.60
 -13   2  -2    5.10    5.10
 -13   2  -2    2.10    4.40
  13  -2   2   -0.10    5.50
 -14   2  -2    4.00    4.00
 -14   2  -2    2.80    3.60
 -14   2  -2    2.30    5.10
 -14   2  -2   -2.50    4.40
  14  -2   2    0.10    6.30
 -15   2  -2    6.00    3.80
 -15   2  -2   -0.40    5.00
 -15   2  -2    4.90    3.90
 -15   2  -2    8.50    4.20
  15  -2   2   18.20    4.60
 -16   2  -2   17.50    5.20
 -16   2  -2   19.10    4.30
 -16   2  -2   17.40    3.70
  16  -2   2   22.50    4.10
 -17   2  -2   -5.20    2.80
 -17   2  -2   -2.50    3.40
 -17   2  -2   -4.00    3.90
  17  -2   2   -3.70    3.20
 -17  -1   2    1.60    3.70
 -17  -1   2    2.90    3.80
 -17  -1   2    3.70    3.10
  16   1  -2    3.10    3.10
  16   1  -2    0.50    6.00
 -16  -1   2   -1.10    3.80
 -16  -1   2   -1.70    4.10
 -16  -1   2    1.30    3.50
 -16  -1   2   -0.40    4.40
  15   1  -2   43.60    5.30
  15   1  -2   62.69    8.70
 -15  -1   2   54.59    6.00
 -15  -1   2   56.29    8.00
 -15  -1   2   54.79    6.20
 -15  -1   2   43.60    6.30
  14   1  -2   -1.50    6.70
  14   1  -2   -4.50    3.90
 -14  -1   2   -1.00    3.70
 -14  -1   2    3.00    4.30
 -14  -1   2    0.60    5.60
 -14  -1   2    4.30    4.00
  13   1  -2   15.10    6.50
 -13  -1   2   10.00    3.50
 -13  -1   2   15.30    4.50
 -13  -1   2   15.00    3.90
 -13  -1   2   14.50    4.20
 -13  -1   2   10.50    8.80
 -13  -1   2   13.20    5.50
  12   1  -2   -0.60    4.70
 -12  -1   2   -1.20    3.20
 -12  -1   2    4.90    3.70
 -12  -1   2   -2.40    3.30
 -12  -1   2   14.50    8.10
 -12  -1   2   -1.50    3.20
 -12  -1   2   -0.30    4.20
 -11  -1   2    5.30    2.80
 -11  -1   2    7.90    4.60
 -11  -1   2    5.80    3.70
 -11  -1   2    6.70    3.10
 -11  -1   2    5.00    3.20
 -11  -1   2    2.60    2.70
 -11  -1   2    0.70    6.10
 -10  -1   2   52.99    8.10
 -10  -1   2   57.19    5.00
 -10  -1   2   61.09    4.60
 -10  -1   2   64.19    4.80
 -10  -1   2   58.19    6.20
 -10  -1   2   54.69    5.40
 -10  -1   2   67.69    5.30
  -9  -1   2    3.80    4.70
  -9  -1   2    2.80    2.40
  -9  -1   2    2.50    2.70
  -9  -1   2    6.70    2.40
  -9  -1   2    6.90    3.50
  -9  -1   2    4.30    2.50
  -9  -1   2   12.70    3.30
  -8  -1   2   61.59    7.10
  -8  -1   2   58.69    5.10
  -7  -1   2  220.98   12.10
  -7  -1   2  202.88   10.30
  -6  -1   2  172.38    8.70
  -6  -1   2  172.68   10.00
  -5  -1   2   99.19    7.30
  -4  -1   2  209.98   10.60
  -3  -1   2    6.30    2.50
   2   1  -2   64.99    3.30
  -2  -1   2   75.49    4.40
   1   1  -2  716.93   30.20
  -1  -1   2  699.03   30.50
   0   1  -2    4.20    1.40
   0  -1   2    3.40    1.50
  -1   1  -2  281.97   13.20
   1  -1   2  309.97   13.30
  -2   1  -2 1139.49   48.80
  -2   1  -2 1139.79   48.90
  -3   1  -2  253.77   12.00
  -3   1  -2  247.48   11.80
  -4   1  -2   55.89    4.40
  -4   1  -2   47.40    5.30
  -5   1  -2  106.09    6.80
  -5   1  -2  108.99    7.10
  -6   1  -2  248.08   13.00
  -6   1  -2  246.58   12.50
  -7   1  -2   82.29    7.30
  -7   1  -2   83.39    6.50
   7  -1   2   77.49    5.10
  -8   1  -2   15.80    4.80
  -8   1  -2   21.60    4.30
   8  -1   2   24.60    3.50
  -9   1  -2   11.10    2.50
  -9   1  -2    3.20    2.90
  -9   1  -2    3.80    2.30
  -9   1  -2    5.90    3.10
  -9   1  -2    4.60    4.90
  -9   1  -2    5.00    2.60
   9  -1   2    8.90    3.30
 -10   1  -2    1.70    2.80
 -10   1  -2    1.00    3.00
 -10   1  -2    2.60    2.80
 -10   1  -2    1.60    5.50
 -10   1  -2    1.10    2.70
 -10   1  -2    2.80    3.50
  10  -1   2    4.00    2.50
  10  -1   2    1.40    3.60
 -11   1  -2    2.80    2.80
 -11   1  -2   -1.70    3.30
 -11   1  -2  -10.10    4.20
 -11   1  -2   -1.60    6.00
 -11   1  -2    0.20    3.00
 -11   1  -2    2.40    3.20
  11  -1   2    1.30    3.70
  11  -1   2    6.40    4.30
 -12   1  -2   17.30    8.00
 -12   1  -2    4.30    4.00
 -12   1  -2    6.60    3.50
 -12   1  -2    4.30    3.30
 -12   1  -2    2.10    3.20
 -12   1  -2   -5.60    4.40
  12  -1   2    9.20    4.80
 -13   1  -2  182.38   11.20
 -13   1  -2  182.68   10.60
 -13   1  -2  196.58   10.30
 -13   1  -2  205.08   10.20
 -13   1  -2  190.28   10.30
 -13   1  -2  136.39   14.30
  13  -1   2  182.18   12.40
 -14   1  -2    2.50    4.40
 -14   1  -2    6.30    3.60
 -14   1  -2    0.80    4.20
 -14   1  -2    2.20    5.20
  14  -1   2    9.40    6.30
 -15   1  -2   -7.70    5.20
 -15   1  -2   -3.40    4.20
 -15   1  -2    2.30    3.40
  15  -1   2   -5.10    5.90
  15  -1   2   -4.10    4.40
 -16   1  -2   -1.80    3.80
 -16   1  -2    4.80    4.80
 -16   1  -2    6.00    3.60
  16  -1   2    1.40    3.80
 -17   1  -2    3.80    3.30
 -17   1  -2   -1.30    2.90
 -17   1  -2   -1.30    4.10
  17  -1   2    2.90    3.20
 -17   0   2    8.70    3.30
 -17   0   2    4.40    3.80
 -17   0   2    3.30    3.80
  16   0  -2   -3.50    5.70
 -16   0   2   -6.50    3.90
 -16   0   2   -4.00    3.70
 -16   0   2    0.50    4.20
 -16   0   2    4.40    4.60
  15   0  -2    5.20    3.40
  15   0  -2   17.30    6.80
 -15   0   2    0.90    4.00
 -15   0   2    5.60    4.30
 -15   0   2   -5.50    5.20
 -15   0   2   -3.90    4.00
  14   0  -2   -3.40    3.80
  14   0  -2    3.40    6.70
 -14   0   2   -0.90    4.10
 -14   0   2    0.20    4.10
 -14   0   2    0.50    4.70
 -14   0   2   -9.60    5.50
  13   0  -2  172.28   11.50
 -13   0   2  170.18    9.90
 -13   0   2  159.78    8.80
 -13   0   2  142.09   14.50
 -13   0   2  185.28    9.10
 -13   0   2  146.29    8.50
 -13   0   2  156.38   10.90
 -12   0   2   21.00    3.70
 -12   0   2   12.50    4.70
 -12   0   2   20.70    8.50
 -12   0   2   10.20    3.40
 -12   0   2   13.10    3.70
 -12   0   2   19.60    4.00
 -11   0   2   73.49    7.60
 -11   0   2   70.79    5.60
 -11   0   2   61.19   10.50
 -11   0   2   85.89    5.20
 -11   0   2   69.89    5.30
 -11   0   2   77.39    5.40
 -11   0   2   70.29    7.00
 -10   0   2  211.08    9.90
 -10   0   2  199.38    9.70
 -10   0   2  205.88   10.70
 -10   0   2  194.28   10.50
 -10   0   2  192.68    9.60
 -10   0   2  195.98   10.00
 -10   0   2  191.68   12.90
  -9   0   2  119.39    6.70
  -9   0   2  133.39    6.80
  -9   0   2  122.69    7.90
  -9   0   2  135.49    6.80
  -9   0   2  128.69    9.70
  -9   0   2  125.09    6.70
  -8   0   2   23.70    4.90
  -8   0   2   24.00    3.60
  -7   0   2   56.39    6.30
  -7   0   2   48.20    5.00
  -6   0   2   84.79    6.50
  -6   0   2   72.49    4.40
  -5   0   2   94.89    6.90
  -5   0   2   86.19    4.80
  -4   0   2  692.03   30.60
  -4   0   2  734.33   31.40
  -3   0   2    9.60    1.70
  -3   0   2   10.70    2.40
   2   0  -2   61.59    3.20
  -2   0   2   63.89    3.70
   1   0  -2  249.48   11.10
  -1   0   2  255.17   11.10
   0   0  -2 1018.60   42.80
   0   0   2  991.00   42.70
  -1   0  -2   92.79    4.70
  -2   0  -2  157.98    7.50
  -2   0  -2  152.58    7.60
  -3   0  -2  532.55   23.90
  -3   0  -2  550.94   23.80
  -4   0  -2  809.12   35.00
  -4   0  -2  798.32   35.20
  -5   0  -2    8.30    2.70
  -5   0  -2    5.00    3.00
  -6   0  -2  123.59    7.30
  -6   0  -2  115.09    7.80
   6   0   2  112.39    6.30
  -7   0  -2  167.98    9.30
  -7   0  -2  178.18   10.70
   7   0   2  161.08    8.50
  -8   0  -2   66.39    7.20
   8   0   2   76.49    5.70
  -9   0  -2   33.60    4.20
  -9   0  -2   39.00    7.10
  -9   0  -2   32.60    4.60
  -9   0  -2   39.10    4.20
  -9   0  -2   32.20    3.90
  -9   0  -2   37.20    4.00
   9   0   2   38.00    3.40
   9   0   2   30.90    4.80
 -10   0  -2   -3.40    6.10
 -10   0  -2   -0.70    2.40
 -10   0  -2   -4.70    3.40
 -10   0  -2    3.70    3.00
 -10   0  -2    1.40    3.10
 -10   0  -2    4.70    2.60
  10   0   2    1.00    3.40
  10   0   2    2.90    2.60
 -11   0  -2    3.60    3.00
 -11   0  -2    3.30    3.20
 -11   0  -2    1.10    7.10
 -11   0  -2    4.10    3.20
 -11   0  -2    1.00    4.00
 -11   0  -2    1.40    3.20
  11   0   2   -1.40    2.70
  11   0   2    2.30    4.20
 -12   0  -2   79.29   11.40
 -12   0  -2   78.69    6.50
 -12   0  -2   54.79    7.20
 -12   0  -2   83.49    6.60
 -12   0  -2   69.29    6.00
 -12   0  -2   76.49    5.90
  12   0   2   80.79    8.40
  12   0   2   74.99    5.50
 -13   0  -2    4.10    5.00
 -13   0  -2   19.70    4.50
 -13   0  -2   15.90    4.10
 -13   0  -2   21.30    4.30
 -13   0  -2   15.40    4.00
 -13   0  -2   16.70    8.10
  13   0   2   14.50    3.50
  13   0   2   10.00    6.20
 -14   0  -2   -5.10    5.60
 -14   0  -2   -1.40    3.70
 -14   0  -2    5.00    4.20
 -14   0  -2    4.80    4.10
  14   0   2    0.60    6.30
 -15   0  -2   12.90    4.40
 -15   0  -2   -0.70    5.40
 -15   0  -2    7.90    4.00
  15   0   2    5.30    4.50
  15   0   2   10.60    6.60
 -16   0  -2   17.00    3.50
 -16   0  -2   16.50    4.90
 -16   0  -2   24.80    4.30
  16   0   2   35.20    6.30
  16   0   2   28.00    4.30
 -17   0  -2   -1.10    3.90
 -17   0  -2    1.00    3.40
 -17   0  -2    1.00    2.70
  17   0   2    2.80    3.30
 -17   1   2   10.50    4.00
 -17   1   2   -3.00    3.70
 -17   1   2    6.50    3.30
  16  -1  -2   30.20    6.20
 -16   1   2   29.80    4.80
 -16   1   2   23.10    4.10
 -16   1   2   38.40    6.60
 -16   1   2   34.90    4.60
  15  -1  -2    7.00    6.60
 -15   1   2    2.80    3.70
 -15   1   2    2.20    5.10
 -15   1   2    9.40    4.60
 -15   1   2    9.70    4.30
  14  -1  -2   63.19    9.60
 -14   1   2   55.69    6.50
 -14   1   2   58.89    6.80
 -14   1   2   62.39    8.20
 -14   1   2   58.89    6.40
  13  -1  -2   67.59    8.50
 -13   1   2   60.69    5.20
 -13   1   2   46.70    5.30
 -13   1   2   45.30   10.40
 -13   1   2   49.00    7.80
 -13   1   2   46.00    6.60
 -13   1   2   50.79    5.20
 -12   1   2  121.49    9.00
 -12   1   2  114.79    7.30
 -12   1   2  112.39    7.40
 -12   1   2  117.89    7.90
 -12   1   2  114.49    6.90
 -12   1   2  119.69   12.00
 -11   1   2   59.69    5.80
 -11   1   2   51.49    7.00
 -11   1   2   61.19    5.20
 -11   1   2   52.79    8.70
 -11   1   2   55.39    4.80
 -11   1   2   58.89    4.80
 -11   1   2   56.09    5.20
 -10   1   2   67.49    9.10
 -10   1   2   61.09    4.80
 -10   1   2   70.59    4.60
 -10   1   2   47.80    5.40
 -10   1   2   48.80    6.10
 -10   1   2   51.09    4.20
 -10   1   2   56.89    5.20
  -9   1   2  201.98    9.60
  -9   1   2  191.48    9.60
  -9   1   2  201.28    9.60
  -9   1   2  201.78   12.40
  -9   1   2  203.28   10.50
  -8   1   2  560.64   27.60
  -8   1   2  616.84   26.20
  -7   1   2  222.28   11.00
  -7   1   2  226.38   10.90
  -7   1   2  235.68   12.80
  -6   1   2    7.70    3.50
  -6   1   2    5.60    2.50
  -5   1   2   38.90    3.80
  -5   1   2   41.60    4.60
  -4   1   2   -0.80    2.10
  -4   1   2   -3.70    2.40
  -3   1   2  344.57   15.40
  -3   1   2  333.37   15.20
  -2   1   2  347.07   15.30
  -2   1   2  347.77   15.30
  -1   1   2    9.70    2.00
  -1   1   2    9.30    1.30
   0  -1  -2    4.00    1.30
  -1  -1  -2   60.59    3.10
  -1  -1  -2   60.99    3.60
  -2  -1  -2   41.50    3.50
  -2  -1  -2   49.70    3.30
  -3  -1  -2  403.96   17.60
  -3  -1  -2  378.26   17.50
  -4  -1  -2   30.60    3.60
  -4  -1  -2   30.60    3.80
  -5  -1  -2    7.40    2.70
  -5  -1  -2   14.40    3.40
  -6  -1  -2   41.80    5.70
  -6  -1  -2   37.20    4.30
   6   1   2   41.70    4.30
  -7  -1  -2   37.70    5.80
  -7  -1  -2   44.80    4.80
   7   1   2   37.50    4.20
  -8  -1  -2    1.10    4.00
   8   1   2    1.10    3.00
  -9  -1  -2  108.09    6.10
  -9  -1  -2   94.39    5.70
  -9  -1  -2   90.09    6.50
  -9  -1  -2   91.69    8.70
  -9  -1  -2   93.79    5.70
  -9  -1  -2   96.69    6.20
   9   1   2   99.59    5.70
   9   1   2   98.09    6.70
 -10  -1  -2    5.40    2.90
 -10  -1  -2    2.20    3.10
 -10  -1  -2    6.40    3.40
 -10  -1  -2    5.30    2.60
 -10  -1  -2    6.10    2.90
 -10  -1  -2    2.40    5.40
  10   1   2   10.00    2.80
  10   1   2    6.00    3.60
 -11  -1  -2   89.59    6.00
 -11  -1  -2   90.59    6.10
 -11  -1  -2   79.79   11.30
 -11  -1  -2   99.59    6.80
 -11  -1  -2   90.09    6.60
 -11  -1  -2   92.59    7.20
  11   1   2   92.79    8.30
  11   1   2   83.49    5.50
 -12  -1  -2    8.80    3.80
 -12  -1  -2    3.70    3.40
 -12  -1  -2    7.90    3.70
 -12  -1  -2    4.40    3.70
 -12  -1  -2    5.00    7.70
 -12  -1  -2   -0.80    4.50
  12   1   2    7.30    3.50
  12   1   2    4.40    5.20
 -13  -1  -2   30.90    5.00
 -13  -1  -2   22.50    5.90
 -13  -1  -2   28.20    4.50
 -13  -1  -2   30.80    4.60
 -13  -1  -2   29.00    4.50
  13   1   2   33.60    6.90
  13   1   2   34.00    4.70
 -14  -1  -2   18.70    4.10
 -14  -1  -2   15.20    4.50
 -14  -1  -2   13.20    5.50
  14   1   2   20.70    7.10
  14   1   2   21.80    3.70
 -15  -1  -2   -0.50    5.10
 -15  -1  -2    1.90    4.10
 -15  -1  -2    4.10    3.70
  15   1   2    8.90    6.60
  15   1   2    0.20    3.20
  15   1   2    2.30    4.50
 -16  -1  -2   -8.60    3.80
 -16  -1  -2   -1.30    4.80
 -16  -1  -2   -0.40    3.10
  16   1   2   -1.70    3.70
  16   1   2    1.00    5.90
 -17   2   2   10.60    4.10
 -17   2   2   11.60    3.40
 -17   2   2   11.50    3.80
 -16   2   2    1.30    4.40
 -16   2   2   -2.70    3.60
 -16   2   2    6.30    4.70
 -16   2   2    2.50    3.80
  15  -2  -2   23.30    6.10
 -15   2   2   13.40    5.30
 -15   2   2    7.00    3.90
 -15   2   2    0.70    4.80
 -15   2   2    3.30    3.90
  14  -2  -2    6.40    6.30
 -14   2   2    5.30    4.20
 -14   2   2    7.80    5.30
 -14   2   2    9.50    4.10
 -14   2   2    9.00    4.50
  13  -2  -2   34.70    6.50
 -13   2   2   15.50    8.00
 -13   2   2   35.50    5.20
 -13   2   2   22.80    4.10
 -13   2   2   20.40    4.50
 -13   2   2   32.20    5.70
 -12   2   2   18.10    7.70
 -12   2   2    4.40    3.50
 -12   2   2    5.30    3.20
 -12   2   2   11.90    2.90
 -12   2   2    9.20    4.40
 -12   2   2   11.30    3.00
 -11   2   2  168.98    8.50
 -11   2   2  153.48    8.30
 -11   2   2  163.28    8.70
 -11   2   2  170.28    8.80
 -11   2   2  153.88    9.90
 -11   2   2  157.08   13.50
 -11   2   2  182.38    9.50
 -10   2   2   93.79    5.80
 -10   2   2   90.29    6.70
 -10   2   2   94.99    7.00
 -10   2   2   99.89    5.60
 -10   2   2  104.69    9.40
 -10   2   2  100.39    6.10
 -10   2   2  100.89    5.80
  -9   2   2   84.69    5.60
  -9   2   2   90.49    8.30
  -9   2   2   90.39    6.20
  -9   2   2   92.09    5.60
  -9   2   2   83.39    5.30
  -9   2   2  103.09    6.70
  -8   2   2   50.49    4.50
  -8   2   2   56.79    6.80
  -8   2   2   58.79    5.50
  -7   2   2  120.39    8.30
  -7   2   2  126.59    7.40
  -7   2   2  109.49    6.90
  -6   2   2    7.20    3.20
  -6   2   2    9.30    2.90
  -5   2   2  508.15   22.70
  -5   2   2  505.05   23.00
  -4   2   2   69.79    5.40
  -4   2   2   70.19    5.00
  -3   2   2 8924.91  366.96
  -3   2   2 8440.75  366.96
  -2   2   2   31.20    3.20
  -2   2   2   29.20    2.70
  -1   2   2   60.89    3.20
  -1   2   2   68.29    4.10
   0   2   2    1.20    1.80
  -1  -2  -2   93.79    4.60
  -1  -2  -2   96.69    5.00
  -2  -2  -2  587.34   25.80
  -2  -2  -2  605.34   26.00
  -3  -2  -2 1086.59   46.40
  -3  -2  -2 1073.19   46.50
  -4  -2  -2  304.67   14.40
  -4  -2  -2  302.17   14.00
  -5  -2  -2  211.68   11.10
  -5  -2  -2  211.68   10.40
  -6  -2  -2   30.60    4.10
  -6  -2  -2   35.40    5.10
   6   2   2   47.00    3.90
  -7  -2  -2  113.59    8.10
   7   2   2  108.49    6.60
  -8  -2  -2    4.90    4.20
  -8  -2  -2    4.40    3.00
  -8  -2  -2   10.10    2.40
  -8  -2  -2    4.80    2.20
   8   2   2    6.00    3.00
   8   2   2    7.00    3.00
  -9  -2  -2   15.00    2.60
  -9  -2  -2   14.10    3.40
  -9  -2  -2   20.60    3.40
  -9  -2  -2    8.80    5.70
  -9  -2  -2   14.50    2.90
  -9  -2  -2   16.80    2.60
   9   2   2   14.90    2.60
   9   2   2   16.80    3.60
 -10  -2  -2   21.80    4.40
 -10  -2  -2   20.60    3.30
 -10  -2  -2   32.80    7.10
 -10  -2  -2   22.80    3.10
 -10  -2  -2   27.10    4.10
 -10  -2  -2   31.50    4.70
  10   2   2   31.80    4.90
  10   2   2   24.90    3.50
 -11  -2  -2   12.00    3.40
 -11  -2  -2   13.20    4.20
 -11  -2  -2    4.60    3.10
 -11  -2  -2   11.80    3.40
 -11  -2  -2   14.30    3.50
 -11  -2  -2    9.10    7.60
  11   2   2    9.30    4.40
  11   2   2   21.30    3.50
 -12  -2  -2   19.80    5.30
 -12  -2  -2   20.10    8.40
 -12  -2  -2   10.80    3.70
 -12  -2  -2   16.80    4.30
 -12  -2  -2    6.60    3.60
 -12  -2  -2   14.00    3.80
  12   2   2   10.90    3.40
  12   2   2   12.70    5.60
 -13  -2  -2   -2.30    3.30
 -13  -2  -2   -4.30    3.80
 -13  -2  -2   -2.90    5.20
 -13  -2  -2   -0.70    4.00
  13   2   2    2.20    6.00
  13   2   2   -1.30    3.10
 -14  -2  -2    1.30    3.80
 -14  -2  -2    5.40    5.20
 -14  -2  -2    2.30    4.40
  14   2   2    6.70    7.10
  14   2   2    3.20    3.50
 -15  -2  -2   14.90    3.70
 -15  -2  -2    5.40    5.30
 -15  -2  -2   13.00    4.30
  15   2   2   12.80    3.50
  15   2   2   15.00    4.40
  15   2   2   15.50    6.80
 -16  -2  -2  -10.90    4.50
 -16  -2  -2   -1.90    2.90
 -16  -2  -2    1.70    3.90
  16   2   2   -0.80    3.80
  16   2   2   -1.00    3.80
  16   2   2   -7.80    8.30
 -17   3   2   14.50    4.00
 -17   3   2   14.60    3.60
 -17   3   2   16.20    4.00
 -16   3   2    4.00    4.40
 -16   3   2    2.20    3.60
 -16   3   2    1.70    4.80
 -16   3   2    2.70    3.80
 -15   3   2   10.70    4.00
 -15   3   2   18.50    4.70
 -15   3   2   16.20    4.30
 -15   3   2   16.90    5.30
  14  -3  -2   31.50    9.20
 -14   3   2   39.00    5.60
 -14   3   2   19.70    5.10
 -14   3   2   24.70    4.40
 -14   3   2   30.80    5.80
  13  -3  -2  248.98   13.70
 -13   3   2  236.68   17.30
 -13   3   2  248.68   12.20
 -13   3   2  241.18   12.30
 -13   3   2  252.07   12.20
 -12   3   2   22.70    8.10
 -12   3   2    0.90    4.00
 -12   3   2    1.00    3.30
 -12   3   2    5.40    2.90
 -12   3   2    9.10    2.80
 -11   3   2    3.90    3.90
 -11   3   2    9.40    6.70
 -11   3   2    7.20    3.00
 -11   3   2    8.40    2.90
 -11   3   2    5.20    3.90
 -11   3   2    5.30    2.80
 -11   3   2    1.60    2.50
 -10   3   2  106.99    6.00
 -10   3   2  113.09    6.40
 -10   3   2  117.39    6.50
 -10   3   2  112.29   10.00
 -10   3   2  107.19    7.30
 -10   3   2  114.39    7.60
 -10   3   2  100.29    6.50
  -9   3   2   69.29    6.50
  -9   3   2   69.29    5.40
  -9   3   2   63.59    4.80
  -9   3   2   64.79    4.50
  -9   3   2   74.59    5.50
  -9   3   2   67.49    7.70
  -8   3   2   61.49    6.70
  -8   3   2   60.59    5.80
  -8   3   2   53.39    4.80
  -7   3   2   19.80    3.90
  -7   3   2   24.70    4.90
  -7   3   2   22.20    3.10
  -6   3   2  113.19    7.40
  -6   3   2   99.09    6.90
  -5   3   2    3.90    3.00
  -5   3   2    5.40    2.90
  -4   3   2   63.49    4.90
  -4   3   2   58.99    5.10
  -3   3   2  616.04   26.40
  -3   3   2  582.04   26.50
  -2   3   2  877.51   37.90
  -2   3   2  889.21   38.40
   1  -3  -2  663.73   28.50
  -1   3   2  660.73   29.10
   0  -3  -2  658.23   28.90
   0   3   2  695.93   29.60
  -1  -3  -2  355.26   15.90
  -1  -3  -2  374.56   16.30
  -2  -3  -2   12.60    2.10
  -2  -3  -2   14.10    2.60
  -3  -3  -2   18.10    3.20
  -3  -3  -2   14.00    2.50
  -4  -3  -2   21.00    3.00
  -4  -3  -2   20.90    4.00
  -5  -3  -2   41.50    5.10
  -5  -3  -2   36.00    3.70
   5   3   2   34.40    4.00
  -6  -3  -2    0.30    2.20
  -6  -3  -2    4.80    3.60
   6   3   2    3.00    2.70
  -7  -3  -2  116.09    8.20
   7   3   2  108.29    6.60
  -8  -3  -2   89.09    6.00
  -8  -3  -2   80.09    5.30
  -8  -3  -2   83.69    7.80
  -8  -3  -2   85.69    5.10
  -8  -3  -2   80.59    5.30
   8   3   2   93.69    6.70
   8   3   2   87.59    5.00
  -9  -3  -2   71.59    5.50
  -9  -3  -2   71.79    9.10
  -9  -3  -2   66.49    4.70
  -9  -3  -2   73.79    4.80
  -9  -3  -2   57.09    5.70
  -9  -3  -2   64.19    4.80
   9   3   2   68.69    4.50
   9   3   2   71.59    6.30
 -10  -3  -2  141.39   11.90
 -10  -3  -2  137.69    7.70
 -10  -3  -2  139.59    7.70
 -10  -3  -2  146.09    8.00
 -10  -3  -2  154.58    8.20
 -10  -3  -2  138.39    8.50
  10   3   2  147.59    7.50
  10   3   2  158.78    9.80
 -11  -3  -2    4.70    6.20
 -11  -3  -2    4.40    3.20
 -11  -3  -2    3.60    3.30
 -11  -3  -2    0.40    4.60
 -11  -3  -2    8.00    3.30
 -11  -3  -2    0.60    3.40
  11   3   2    5.30    4.80
  11   3   2    0.90    3.00
 -12  -3  -2   74.59   12.30
 -12  -3  -2  118.99   11.30
 -12  -3  -2  100.19    7.00
 -12  -3  -2  104.49    7.70
 -12  -3  -2  110.59    7.30
 -12  -3  -2   91.49    8.50
  12   3   2  115.89    9.90
  12   3   2  102.99    6.40
 -13  -3  -2    3.30    3.80
 -13  -3  -2   -1.70    3.90
 -13  -3  -2    2.60    5.30
 -13  -3  -2    3.90    4.10
  13   3   2    7.90    3.80
  13   3   2    7.10    6.40
 -14  -3  -2   -5.40    5.40
 -14  -3  -2   -4.80    3.40
 -14  -3  -2   -0.50    3.90
  14   3   2    1.50    3.50
  14   3   2    2.70    6.90
 -15  -3  -2   10.10    3.90
 -15  -3  -2    8.50    3.50
 -15  -3  -2    7.90    5.20
  15   3   2   14.70    6.90
  15   3   2    9.60    3.40
  15   3   2    4.90    4.30
 -16  -3  -2    1.60    2.70
 -16  -3  -2    6.20    3.80
 -16  -3  -2    0.80    4.30
  16   3   2    1.30    3.60
  16   3   2   -1.10    2.60
  17  -4  -2   -9.80    3.20
 -17   4   2   -3.90    3.60
 -17   4   2   -2.30    3.30
 -17   4   2   -1.50    4.00
 -16   4   2   -1.00    3.70
 -16   4   2    3.50    4.40
 -16   4   2    2.00    4.10
 -15   4   2   20.60    5.00
 -15   4   2   30.80    4.50
 -15   4   2   19.40    5.30
 -15   4   2   27.40    4.20
 -14   4   2   22.80    5.50
 -14   4   2   13.60    4.00
 -14   4   2   22.20    4.20
 -14   4   2   16.30    4.30
 -13   4   2   28.10    5.50
 -13   4   2   21.90    8.20
 -13   4   2   13.30    4.50
 -13   4   2   21.00    3.50
 -13   4   2   14.70    3.80
 -12   4   2   10.10    3.60
 -12   4   2    9.00    3.00
 -12   4   2   18.40    3.60
 -12   4   2    6.90    4.50
 -12   4   2    6.70    7.30
 -12   4   2    4.00    3.20
 -11   4   2   -4.90    3.50
 -11   4   2    0.40    2.40
 -11   4   2    1.90    3.60
 -11   4   2    3.10    2.30
 -11   4   2    2.30    3.00
 -11   4   2    6.70    5.80
 -11   4   2   -3.10    3.00
 -10   4   2  119.99    6.70
 -10   4   2  133.49    7.50
 -10   4   2  128.19   10.40
 -10   4   2  124.39    6.90
 -10   4   2  133.39    7.70
 -10   4   2  113.39    6.70
 -10   4   2  120.59    6.60
  -9   4   2   -2.00    2.70
  -9   4   2   -1.00    2.10
  -9   4   2   -1.50    4.50
  -9   4   2    2.60    3.00
  -9   4   2    2.20    3.80
  -9   4   2    2.50    2.40
  -9   4   2    0.40    3.80
  -8   4   2   50.99    4.40
  -8   4   2   49.50    6.80
  -8   4   2   53.69    6.20
  -7   4   2    5.40    3.70
  -7   4   2   -0.90    4.10
  -6   4   2   83.79    6.70
  -6   4   2   76.89    6.70
  -5   4   2  209.98   11.10
  -5   4   2  215.28   11.20
  -4   4   2  905.61   40.60
  -4   4   2  945.31   40.50
  -3   4   2   39.10    4.70
   2  -4  -2   39.50    3.50
  -2   4   2   35.50    4.50
   1  -4  -2 2184.88   94.69
  -1   4   2 2275.87   95.29
   0  -4  -2  988.80   43.20
   0   4   2 1034.40   43.90
  -1  -4  -2   81.69    4.70
   1   4   2   83.69    5.70
  -2  -4  -2   48.10    4.10
  -2  -4  -2   53.29    4.00
  -3  -4  -2   58.89    4.40
  -3  -4  -2   58.39    4.40
  -4  -4  -2    3.50    2.60
  -4  -4  -2    3.70    2.20
  -5  -4  -2  185.98    9.10
  -5  -4  -2  186.88   10.00
   5   4   2  171.28    9.00
  -6  -4  -2   67.49    6.80
   6   4   2   65.69    4.90
  -7  -4  -2    9.40    2.80
  -7  -4  -2    8.50    4.30
   7   4   2    7.00    2.30
   7   4   2    6.10    2.80
  -8  -4  -2   75.79    5.70
  -8  -4  -2   71.49    4.70
  -8  -4  -2   75.89    5.10
  -8  -4  -2   72.59    7.40
  -8  -4  -2   80.99    5.20
  -8  -4  -2   79.09    5.00
   8   4   2   76.39    6.10
   8   4   2   66.89    4.70
   8   4   2   75.99    4.70
  -9  -4  -2    3.90    2.80
  -9  -4  -2    2.50    2.80
  -9  -4  -2    5.80    2.50
  -9  -4  -2   12.70    5.50
  -9  -4  -2    0.50    2.50
  -9  -4  -2    1.30    3.40
   9   4   2    2.50    2.70
   9   4   2   11.80    4.20
 -10  -4  -2   12.30    3.90
 -10  -4  -2   12.50    3.10
 -10  -4  -2    7.80    2.90
 -10  -4  -2    2.30    5.70
 -10  -4  -2    9.00    3.10
 -10  -4  -2    9.80    3.10
  10   4   2   15.80    3.00
  10   4   2   12.20    4.20
 -11  -4  -2   13.40    3.50
 -11  -4  -2   14.80    3.40
 -11  -4  -2   20.20    7.30
 -11  -4  -2   12.50    3.70
 -11  -4  -2   10.60    4.40
 -11  -4  -2    6.70    3.40
  11   4   2   15.50    3.80
  11   4   2    7.60    4.60
 -12  -4  -2   44.30    5.30
 -12  -4  -2   34.70    5.40
 -12  -4  -2   40.10    7.20
 -12  -4  -2   36.90    6.10
 -12  -4  -2   30.00    9.20
  12   4   2   37.60    4.70
  12   4   2   44.40    6.80
 -13  -4  -2   68.99    8.40
 -13  -4  -2   71.79    6.20
 -13  -4  -2   82.49    7.10
  13   4   2   71.39    9.80
  13   4   2   76.89    6.10
 -14  -4  -2    3.10    4.50
 -14  -4  -2    2.60    5.10
 -14  -4  -2    5.70    3.40
  14   4   2   14.70    6.80
  14   4   2   11.90    4.70
  14   4   2    5.40    3.80
 -15  -4  -2    1.60    3.00
 -15  -4  -2    3.40    4.00
 -15  -4  -2   -3.30    4.80
  15   4   2    0.00    3.30
  15   4   2   -1.80    6.30
  15   4   2   -0.70    4.10
 -16  -4  -2    9.50    3.60
 -16  -4  -2    6.30    4.10
 -16  -4  -2   -2.00    2.50
  16   4   2   10.70    3.60
  16   4   2    4.60    2.60
 -17   5   2    5.00    3.20
 -17   5   2    1.10    3.90
 -17   5   2    1.40    3.70
 -16   5   2    7.70    4.50
 -16   5   2   11.10    4.40
 -16   5   2   11.90    3.80
 -15   5   2   21.80    4.60
 -15   5   2   13.90    5.00
 -15   5   2   15.20    3.60
 -15   5   2   12.40    4.00
 -14   5   2   64.89    5.70
 -14   5   2   66.19    6.90
 -14   5   2   52.29    6.00
 -14   5   2   52.09    6.60
 -13   5   2   62.39    6.00
 -13   5   2   54.89    6.40
 -13   5   2   62.19    6.90
 -13   5   2   52.39    6.60
 -13   5   2   66.59    6.00
 -12   5   2   73.99    7.50
 -12   5   2   79.69    6.80
 -12   5   2   75.19    5.40
 -12   5   2   69.19    5.80
 -12   5   2   57.49    5.30
 -11   5   2   56.79    5.10
 -11   5   2   60.59    4.70
 -11   5   2   67.39    5.70
 -11   5   2   72.59   10.40
 -11   5   2   66.79    6.10
 -11   5   2   55.79    5.70
 -10   5   2   14.20    3.00
 -10   5   2    8.40    2.80
 -10   5   2   12.70    3.70
 -10   5   2   29.60    6.80
 -10   5   2   16.60    2.70
 -10   5   2   10.90    2.20
  -9   5   2   19.60    4.00
  -9   5   2   19.50    2.90
  -9   5   2   22.40    5.90
  -9   5   2   24.40    3.10
  -9   5   2   21.00    3.40
  -9   5   2   20.80    5.10
  -8   5   2   21.00    4.90
  -8   5   2   26.10    5.20
  -7   5   2   20.20    4.30
  -7   5   2   27.80    5.10
  -6   5   2    6.50    3.60
  -6   5   2   11.20    3.80
  -5   5   2  444.76   20.10
  -5   5   2  408.96   20.10
   4  -5  -2   52.59    5.60
  -4   5   2   70.09    5.70
   3  -5  -2 1543.55   68.59
  -3   5   2 1647.24   69.09
   2  -5  -2  304.77   14.80
  -2   5   2  344.17   15.70
   1  -5  -2  156.78    8.20
  -1   5   2  171.58    9.20
   0  -5  -2   46.20    3.50
   0   5   2   33.00    4.80
  -1  -5  -2    6.90    2.00
   1   5   2    5.90    2.70
  -2  -5  -2  349.47   16.00
  -2  -5  -2  354.56   16.20
  -3  -5  -2  167.78    8.80
  -3  -5  -2  174.88    8.80
  -4  -5  -2  507.15   22.70
  -4  -5  -2  491.55   22.20
   4   5   2  487.95   21.80
  -5  -5  -2   78.09    6.20
  -5  -5  -2   80.39    5.30
   5   5   2   85.39    5.70
  -6  -5  -2  104.19    8.30
   6   5   2  111.99    6.80
  -7  -5  -2  247.58   11.40
  -7  -5  -2  248.78   14.10
  -7  -5  -2  250.67   11.50
  -7  -5  -2  240.48   11.90
   7   5   2  260.57   11.40
   7   5   2  243.48   11.30
   7   5   2  245.58   12.20
  -8  -5  -2   67.19    8.30
  -8  -5  -2   66.19    4.80
  -8  -5  -2   74.19    5.20
  -8  -5  -2   72.29    5.50
  -8  -5  -2   75.49    4.80
  -8  -5  -2   70.39    5.70
   8   5   2   78.79    6.80
   8   5   2   76.19    4.70
   8   5   2   77.89    4.90
  -9  -5  -2   26.40    4.30
  -9  -5  -2   15.90    2.90
  -9  -5  -2   25.80    6.00
  -9  -5  -2   21.00    3.90
  -9  -5  -2   17.90    3.10
  -9  -5  -2   16.90    3.20
   9   5   2   15.50    2.90
   9   5   2   16.10    4.10
   9   5   2   19.00    3.00
 -10  -5  -2    6.00    3.10
 -10  -5  -2    4.30    3.20
 -10  -5  -2    3.60    3.10
 -10  -5  -2    4.90    4.00
 -10  -5  -2    1.60    2.90
 -10  -5  -2   -4.80    6.20
  10   5   2    1.90    3.00
  10   5   2    5.50    4.80
 -11  -5  -2   15.60    3.70
 -11  -5  -2   19.70    5.00
 -11  -5  -2   18.20    3.80
 -11  -5  -2   18.40    7.20
 -11  -5  -2   16.50    3.70
  11   5   2   20.50    5.90
  11   5   2   19.40    3.80
 -12  -5  -2    0.80    3.80
 -12  -5  -2    2.70    3.50
 -12  -5  -2    0.40    3.70
 -12  -5  -2   -1.40    5.00
  12   5   2    1.10    5.90
  12   5   2    0.80    3.40
 -13  -5  -2    5.60    4.80
 -13  -5  -2   14.20    3.60
 -13  -5  -2   18.70    4.30
  13   5   2   18.60    6.60
  13   5   2   16.10    3.80
 -14  -5  -2   -1.10    4.40
 -14  -5  -2    5.50    3.20
 -14  -5  -2    6.60    5.20
  14   5   2   -3.60    3.40
  14   5   2    2.80    4.20
  14   5   2   -0.20    6.20
 -15  -5  -2    5.00    4.50
 -15  -5  -2    3.90    3.90
  15   5   2    5.50    3.30
  15   5   2   13.70    6.10
  15   5   2   11.90    4.00
 -17   6   2    4.40    3.80
 -17   6   2    5.50    3.10
 -17   6   2    4.50    3.70
 -16   6   2    0.10    4.40
 -16   6   2    1.70    3.50
 -16   6   2   -2.80    4.10
 -15   6   2   17.50    5.10
 -15   6   2    8.30    4.40
 -15   6   2   15.30    3.70
 -14   6   2   18.20    3.90
 -14   6   2   21.40    4.40
 -14   6   2   15.90    4.20
 -14   6   2   16.50    5.10
  13  -6  -2   35.30   11.50
 -13   6   2   22.20    4.20
 -13   6   2   28.70    4.60
 -13   6   2   28.20    4.00
 -13   6   2   23.40    5.20
  12  -6  -2   25.90    8.90
 -12   6   2   23.40    5.00
 -12   6   2   24.50    4.00
 -12   6   2   23.40    3.60
 -12   6   2   25.70    4.30
  11  -6  -2    1.90    7.40
 -11   6   2    6.10    4.40
 -11   6   2    0.60    2.40
 -11   6   2    5.60    3.50
 -11   6   2    2.70    3.20
 -10   6   2   45.30    4.30
 -10   6   2   48.10    5.20
 -10   6   2   54.09    5.50
 -10   6   2   48.00    5.30
  -9   6   2    2.30    2.60
  -9   6   2    7.90    2.20
  -9   6   2    3.40    3.20
  -9   6   2    3.60    2.20
  -9   6   2    3.90    2.90
  -9   6   2   -3.30    4.20
  -8   6   2   59.99    4.40
  -8   6   2   59.29    7.00
  -8   6   2   56.99    4.60
  -8   6   2   61.59    5.20
  -7   6   2   82.99    7.90
   6  -6  -2  430.86   21.40
  -6   6   2  429.76   20.80
   5  -6  -2  290.27   14.90
  -5   6   2  279.67   14.70
   4  -6  -2   28.50    4.30
  -4   6   2   42.50    5.40
   3  -6  -2   39.90    4.60
  -3   6   2   39.40    6.00
   2  -6  -2  223.78   11.20
  -2   6   2  217.78   11.80
   1  -6  -2  264.87   12.30
  -1   6   2  249.08   13.10
   0  -6  -2  100.19    5.90
   0   6   2  107.49    7.30
  -1  -6  -2   32.20    3.50
   1   6   2   29.50    4.20
  -2  -6  -2   47.00    4.60
  -2  -6  -2   56.89    4.90
  -3  -6  -2    0.50    2.40
  -3  -6  -2   -1.50    2.50
  -4  -6  -2   41.10    4.40
  -4  -6  -2   42.50    5.30
   4   6   2   34.40    4.10
  -5  -6  -2   -0.80    3.10
   5   6   2    0.10    2.30
  -6  -6  -2  122.29    6.80
  -6  -6  -2  127.59    9.00
   6   6   2  117.49    6.10
   6   6   2  107.99    6.10
   6   6   2  126.59    7.20
  -7  -6  -2  130.79    6.60
  -7  -6  -2  112.79    6.60
  -7  -6  -2  126.29    9.70
  -7  -6  -2  127.49    6.60
  -7  -6  -2  117.69    7.20
   7   6   2  118.69    7.40
   7   6   2  126.99    6.40
   7   6   2  120.49    6.40
  -8  -6  -2  159.58   11.30
  -8  -6  -2  147.39    8.20
  -8  -6  -2  165.38    9.20
  -8  -6  -2  160.08    8.20
  -8  -6  -2  167.28    8.40
   8   6   2  163.38    8.00
   8   6   2  164.38    9.60
   8   6   2  147.29    8.10
  -9  -6  -2  101.09    9.80
  -9  -6  -2   81.19    5.90
  -9  -6  -2   91.99    6.00
  -9  -6  -2   84.49    6.80
  -9  -6  -2  100.09    6.00
   9   6   2   82.69    7.30
   9   6   2   84.69    5.70
   9   6   2   87.79    5.50
 -10  -6  -2   69.39    7.70
 -10  -6  -2   51.09   10.40
 -10  -6  -2   75.49    6.40
 -10  -6  -2   84.89    6.00
  10   6   2   80.99    5.80
  10   6   2   83.69    5.60
  10   6   2   75.99    8.70
 -11  -6  -2   11.40    4.70
 -11  -6  -2   21.20    3.80
 -11  -6  -2   22.80    4.30
  11   6   2   24.60    4.20
  11   6   2   16.50    5.80
 -12  -6  -2    6.10    4.10
 -12  -6  -2    3.40    5.20
  12   6   2   -5.20    3.40
  12   6   2    1.80    6.00
 -13  -6  -2   -4.20    4.00
 -13  -6  -2    0.40    4.70
  13   6   2   11.10    6.40
  13   6   2    5.10    4.20
  13   6   2   -3.10    4.00
 -14  -6  -2   -0.70    4.30
 -14  -6  -2    0.50    5.00
  14   6   2    2.50    6.40
  14   6   2    6.50    3.70
  14   6   2    0.90    4.00
 -15  -6  -2    3.40    4.50
 -15  -6  -2   -2.30    3.70
  15   6   2    4.80    3.60
  15   6   2    3.80    2.90
 -17   7   2   -0.80    3.40
 -17   7   2    0.50    2.70
 -17   7   2    5.50    3.40
 -16   7   2   10.70    3.90
 -16   7   2   17.60    3.40
 -16   7   2   10.80    4.60
 -15   7   2   13.30    3.60
 -15   7   2    4.90    4.70
 -15   7   2    8.40    4.50
 -14   7   2   14.60    3.60
 -14   7   2    8.70    4.40
 -14   7   2    7.90    4.60
 -14   7   2   -0.40    4.70
 -13   7   2    0.00    4.10
 -13   7   2   -1.80    3.30
 -13   7   2    5.00    4.00
 -13   7   2   -2.80    4.80
  12  -7  -2   11.80    9.30
 -12   7   2    1.30    3.70
 -12   7   2   13.60    4.70
 -12   7   2    4.50    3.00
 -12   7   2    3.90    4.00
  11  -7  -2   -1.30    7.10
 -11   7   2    3.00    3.60
 -11   7   2    3.60    4.10
 -11   7   2   -2.10    3.50
 -11   7   2    0.40    2.60
  10  -7  -2   53.29   10.80
 -10   7   2   34.70    4.10
 -10   7   2   26.80    6.80
 -10   7   2   45.80    5.90
 -10   7   2   48.20    4.50
 -10   7   2   34.70    4.40
 -10   7   2   39.20    5.40
   9  -7  -2   12.20    6.70
  -9   7   2    2.80    3.00
  -9   7   2   -3.00    2.10
  -9   7   2    5.50    3.20
  -9   7   2    6.80    2.60
  -9   7   2   -1.60    2.60
  -9   7   2    4.20    5.60
[truncated: 2,360,333 more chars]
