# Supplementary material for: A crystalline monosubstituted carbene
Source: Springer Nature journal article supplement (doi:10.1038/s41557-018-0153-1), 2018-10-05
Supplement: 41557_2018_153_MOESM69_ESM.cif [file 41557_2018_153_MOESM69_ESM.cif]

data_test_a_sq_sq_sq
_audit_creation_date              2017-12-04
_audit_creation_method
;
Olex2 1.2-beta
(compiled 2017.08.10 svn.r3458 for OlexSys, GUI svn.r5381)
;
_shelx_SHELXL_version_number      '2016/6'
_publ_contact_author_address      ?
_publ_contact_author_email        ?
_publ_contact_author_id_orcid     ?
_publ_contact_author_name         ''
_publ_contact_author_phone        ?
_publ_section_references
;
Dolomanov, O.V., Bourhis, L.J., Gildea, R.J, Howard, J.A.K. & Puschmann, H.
 (2009), J. Appl. Cryst. 42, 339-341.

Sheldrick, G.M. (2015). Acta Cryst. A71, 3-8.

Sheldrick, G.M. (2015). Acta Cryst. C71, 3-8.
;
_chemical_name_common             ?
_chemical_name_systematic         ?
_chemical_formula_moiety          'C103 H51 F48 N'
_chemical_formula_sum             'C103 H51 F48 N'
_chemical_formula_weight          2214.45
_chemical_melting_point           ?
loop_
  _atom_type_symbol
  _atom_type_description
  _atom_type_scat_dispersion_real
  _atom_type_scat_dispersion_imag
  _atom_type_scat_source
 'C' 'C' 0.0033 0.0016 'International Tables Vol C Tables 4.2.6.8 and 6.1.1.4'
 'H' 'H' 0.0000 0.0000 'International Tables Vol C Tables 4.2.6.8 and 6.1.1.4'
 'F' 'F' 0.0171 0.0103 'International Tables Vol C Tables 4.2.6.8 and 6.1.1.4'
 'N' 'N' 0.0061 0.0033 'International Tables Vol C Tables 4.2.6.8 and 6.1.1.4'

_shelx_space_group_comment
;
The symmetry employed for this shelxl refinement is uniquely defined
by the following loop, which should always be used as a source of
symmetry information in preference to the above space-group names.
They are only intended as comments.
;
_space_group_crystal_system       'triclinic'
_space_group_IT_number            2
_space_group_name_H-M_alt         'P -1'
_space_group_name_Hall            '-P 1'
loop_
  _space_group_symop_operation_xyz
 'x, y, z'
 '-x, -y, -z'

_cell_length_a                    15.6809(6)
_cell_length_b                    17.3369(8)
_cell_length_c                    19.2948(8)
_cell_angle_alpha                 85.082(2)
_cell_angle_beta                  78.7610(10)
_cell_angle_gamma                 81.200(2)
_cell_volume                      5075.8(4)
_cell_formula_units_Z             2
_cell_measurement_reflns_used     9853
_cell_measurement_temperature     100.0
_cell_measurement_theta_max       24.09
_cell_measurement_theta_min       2.28
_shelx_estimated_absorpt_T_max    0.986
_shelx_estimated_absorpt_T_min    0.971
_exptl_absorpt_coefficient_mu     0.146
_exptl_absorpt_correction_T_max   0.7452
_exptl_absorpt_correction_T_min   0.7248
_exptl_absorpt_correction_type    multi-scan
_exptl_absorpt_process_details
'SADABS-2016/2 (Bruker,2016/2) was used for absorption correction. wR2(int) was 0.0748 before and 0.0395 after correction. The Ratio of minimum to maximum transmission is 0.9726. The \l/2 correction factor is Not present.'
_exptl_crystal_colour             colourless
_exptl_crystal_colour_primary     colourless
_exptl_crystal_density_diffrn     1.449
_exptl_crystal_density_meas       ?
_exptl_crystal_density_method     ?
_exptl_crystal_description        block
_exptl_crystal_F_000              2216
_exptl_crystal_size_max           0.2
_exptl_crystal_size_mid           0.2
_exptl_crystal_size_min           0.1
_exptl_transmission_factor_max    ?
_exptl_transmission_factor_min    ?
_diffrn_reflns_av_R_equivalents   0.0355
_diffrn_reflns_av_unetI/netI      0.0348
_diffrn_reflns_Laue_measured_fraction_full 0.999
_diffrn_reflns_Laue_measured_fraction_max 0.994
_diffrn_reflns_limit_h_max        18
_diffrn_reflns_limit_h_min        -16
_diffrn_reflns_limit_k_max        20
_diffrn_reflns_limit_k_min        -20
_diffrn_reflns_limit_l_max        23
_diffrn_reflns_limit_l_min        -23
_diffrn_reflns_number             86301
_diffrn_reflns_point_group_measured_fraction_full 0.999
_diffrn_reflns_point_group_measured_fraction_max 0.994
_diffrn_reflns_theta_full         25.242
_diffrn_reflns_theta_max          25.452
_diffrn_reflns_theta_min          1.190
_diffrn_ambient_temperature       100.0
_diffrn_detector                  'Bruker APEX2 area detector'
_diffrn_detector_area_resol_mean  7.9
_diffrn_detector_type             'CCD area detector'
_diffrn_measured_fraction_theta_full 0.999
_diffrn_measured_fraction_theta_max 0.994
_diffrn_measurement_device        'three-circle diffractometer'
_diffrn_measurement_device_type   'Bruker SMART APEX2 area detector'
_diffrn_measurement_method        '\w and \f scans'
_diffrn_radiation_monochromator   'mirror optics'
_diffrn_radiation_probe           x-ray
_diffrn_radiation_type            MoK\a
_diffrn_radiation_wavelength      0.71073
_diffrn_source                    'microfocus sealed X-ray tube'
_diffrn_source_type               'Incoatec I\ms'
_diffrn_standards_number          0
_reflns_Friedel_coverage          0.000
_reflns_Friedel_fraction_full     .
_reflns_Friedel_fraction_max      .
_reflns_number_gt                 14088
_reflns_number_total              18677
_reflns_special_details
;
 Reflections were merged by SHELXL according to the crystal
 class for the calculation of statistics and refinement.
 
 Structure factors included contributions from the .fab file.
 
 _reflns_Friedel_fraction is defined as the number of unique
 Friedel pairs measured divided by the number that would be
 possible theoretically, ignoring centric projections and
 systematic absences.
;
_reflns_threshold_expression      'I > 2\s(I)'
_computing_cell_refinement        'SAINT v8.37A (Bruker, 2015)'
_computing_data_collection        'APEX3 v2016.1-0 (Bruker, 2016)'
_computing_data_reduction         'SAINT v8.37A (Bruker, 2015)'
_computing_molecular_graphics     'Olex2 (Dolomanov et al., 2009)'
_computing_publication_material   'Olex2 (Dolomanov et al., 2009)'
_computing_structure_refinement   'ShelXL (Sheldrick, 2015)'
_computing_structure_solution     'ShelXT (Sheldrick, 2015)'
_refine_diff_density_max          0.676
_refine_diff_density_min          -0.671
_refine_diff_density_rms          0.063
_refine_ls_extinction_coef        .
_refine_ls_extinction_method      none
_refine_ls_goodness_of_fit_ref    1.023
_refine_ls_hydrogen_treatment     constr
_refine_ls_matrix_type            full
_refine_ls_number_parameters      1562
_refine_ls_number_reflns          18677
_refine_ls_number_restraints      297
_refine_ls_R_factor_all           0.0840
_refine_ls_R_factor_gt            0.0615
_refine_ls_restrained_S_all       1.056
_refine_ls_shift/su_max           0.001
_refine_ls_shift/su_mean          0.000
_refine_ls_structure_factor_coef  Fsqd
_refine_ls_weighting_details
'w=1/[\s^2^(Fo^2^)+(0.0474P)^2^+11.7070P] where P=(Fo^2^+2Fc^2^)/3'
_refine_ls_weighting_scheme       calc
_refine_ls_wR_factor_gt           0.1385
_refine_ls_wR_factor_ref          0.1506
_refine_special_details           ?
_olex2_refinement_description
;
1. Fixed Uiso
 At 1.2 times of:
  All C(H) groups, All C(H,H) groups
2. Restrained distances
 F26A-C103 = F26-C103 = F27A-C103 = F25-C103 = F25A-C103 = F27-C103
 1.32 with sigma of 0.02
 F27A-F25A
 2.1 with sigma of 0.02
 F26A-F25A
 2.1 with sigma of 0.02
 F26A-F27A
 2.1 with sigma of 0.02
 F26-F27
 2.1 with sigma of 0.02
 F26-F25
 2.1 with sigma of 0.02
 F25-F27
 2.1 with sigma of 0.02
 F36-C95 = F35-C95 = F34-C95 = F34A-C95A = F35A-C95A = F36A-C95A
 1.32 with sigma of 0.02
 F36A-F34A
 2.1 with sigma of 0.02
 F34A-F35A
 2.1 with sigma of 0.02
 F35A-F36A
 2.1 with sigma of 0.02
 F19-C58 = F20-C58 = F20A-C58 = F21-C58 = F21A-C58
 1.32 with sigma of 0.02
 F23-C59A = F23A-C59 = F24A-C59 = F24-C59A = F22A-C59 = F22-C59A
 1.32 with sigma of 0.02
 C95A-C92 = C95-C92
 1.48 with sigma of 0.02
 F24-F23
 2.1 with sigma of 0.02
 F24-F22
 2.1 with sigma of 0.02
 F23A-F24A
 2.1 with sigma of 0.02
 F24A-F22A
 2.1 with sigma of 0.02
 F23A-F22A
 2.1 with sigma of 0.02
 F23-F24
 2.1 with sigma of 0.02
 F23-F22
 2.1 with sigma of 0.02
 F22-F24
 2.1 with sigma of 0.02
 F4-C28 = F4A-C28A = F5A-C28A = F5-C28 = F6A-C28A = F6-C28
 1.32 with sigma of 0.01
 F27A-C103 \\sim F25-C103 \\sim F25A-C103 \\sim F27-C103 \\sim F26A-C103 \\sim
F26-C103
 with sigma of 0.01
3. Uiso/Uaniso restraints and constraints
Uanis(C73) = Uanis(C73A)
Uanis(C95A) = Uanis(C95)
Uanis(F34A) = Uanis(F34)
Uanis(F35A) = Uanis(F35)
Uanis(F36A) = Uanis(F36)
Uanis(C59) = Uanis(C59A)
Uanis(C81) = Uanis(C81A)
Uanis(C28A) = Uanis(C28)
4. Rigid body (RIGU) restrains
 F46, C73, F47, F48
 with sigma for 1-2 distances of 0.004 and sigma for 1-3 distances of 0.004
 F46A, C73A, F47A, F48A
 with sigma for 1-2 distances of 0.004 and sigma for 1-3 distances of 0.004
 F36, C95, F34, F35
 with sigma for 1-2 distances of 0.004 and sigma for 1-3 distances of 0.004
 F36A, F34A, F35A
 with sigma for 1-2 distances of 0.004 and sigma for 1-3 distances of 0.004
 F23, C59A, F24, F22
 with sigma for 1-2 distances of 0.004 and sigma for 1-3 distances of 0.004
 F23A, C59, F24A, F22A
 with sigma for 1-2 distances of 0.004 and sigma for 1-3 distances of 0.004
 F39A, C81A, F38A, F37A
 with sigma for 1-2 distances of 0.004 and sigma for 1-3 distances of 0.004
 F38, C81, F39, F37
 with sigma for 1-2 distances of 0.004 and sigma for 1-3 distances of 0.004
 F6A, C28A, F4A, F5A
 with sigma for 1-2 distances of 0.004 and sigma for 1-3 distances of 0.004
 F4, C28, F5, F6
 with sigma for 1-2 distances of 0.004 and sigma for 1-3 distances of 0.004
 F20A, C58, F21A, F19A
 with sigma for 1-2 distances of 0.004 and sigma for 1-3 distances of 0.004
 F20, F21, C58, F19
 with sigma for 1-2 distances of 0.002 and sigma for 1-3 distances of 0.004
 F27A, F25A, F26A, C103
 with sigma for 1-2 distances of 0.002 and sigma for 1-3 distances of 0.004
 F26, F25, F27, C103
 with sigma for 1-2 distances of 0.002 and sigma for 1-3 distances of 0.004
5. Others
 Sof(F47)=Sof(C73)=Sof(F48)=Sof(F46)=1-FVAR(1)
 Sof(F46A)=Sof(F48A)=Sof(F47A)=Sof(C73A)=FVAR(1)
 Sof(F26A)=Sof(F25A)=Sof(F27A)=1-FVAR(2)
 Sof(F25)=Sof(F26)=Sof(F27)=FVAR(2)
 Sof(C95A)=Sof(F35A)=Sof(F34A)=Sof(F36A)=1-FVAR(3)
 Sof(F34)=Sof(F35)=Sof(F36)=Sof(C95)=FVAR(3)
 Sof(F19)=Sof(F21)=Sof(F20)=1-FVAR(4)
 Sof(F19A)=Sof(F21A)=Sof(F20A)=FVAR(4)
 Sof(F23)=Sof(C59A)=Sof(F22)=Sof(F24)=1-FVAR(5)
 Sof(F22A)=Sof(F23A)=Sof(F24A)=Sof(C59)=FVAR(5)
 Sof(F38A)=Sof(C81A)=Sof(F39A)=Sof(F37A)=1-FVAR(6)
 Sof(F38)=Sof(F39)=Sof(F37)=Sof(C81)=FVAR(6)
 Sof(C28A)=Sof(F6A)=Sof(F4A)=Sof(F5A)=1-FVAR(7)
 Sof(F5)=Sof(F6)=Sof(F4)=Sof(C28)=FVAR(7)
6.a Ternary CH refined with riding coordinates:
 C1(H1), C2(H2), C7(H7)
6.b Secondary CH2 refined with riding coordinates:
 C3(H3A,H3B), C6(H6A,H6B), C5(H5A,H5B), C4(H4A,H4B)
6.c Aromatic/amide H refined with riding coordinates:
 C65(H65), C87(H87), C85(H85), C83(H83), C39(H39), C61(H61), C21(H21),
 C13(H13), C19(H19), C63(H63), C17(H17), C89(H89), C10(H10), C41(H41), C71(H71),
  C43(H43), C49(H49), C93(H93), C12(H12), C97(H97), C35(H35), C11(H11),
 C31(H31), C53(H53), C23(H23), C101(H101), C67(H67), C69(H69), C45(H45),
 C27(H27), C79(H79), C33(H33), C91(H91), C57(H57), C75(H75), C99(H99), C47(H47),
  C77(H77), C25(H25), C55(H55)
;
_atom_sites_solution_hydrogens    geom
_atom_sites_solution_primary      dual
_atom_sites_solution_secondary    ?
loop_
  _atom_site_label
  _atom_site_type_symbol
  _atom_site_fract_x
  _atom_site_fract_y
  _atom_site_fract_z
  _atom_site_U_iso_or_equiv
  _atom_site_adp_type
  _atom_site_occupancy
  _atom_site_site_symmetry_order
  _atom_site_calc_flag
  _atom_site_refinement_flags_posn
  _atom_site_refinement_flags_adp
  _atom_site_refinement_flags_occupancy
  _atom_site_disorder_assembly
  _atom_site_disorder_group
 F29 F 1.25986(13) 0.29840(13) 0.88042(11) 0.0438(5) Uani 1 1 d . . . . .
 F43 F 0.82855(15) -0.28743(11) 0.64858(14) 0.0521(6) Uani 1 1 d . . . . .
 F33 F 0.56415(13) 0.53221(14) 0.94709(11) 0.0482(6) Uani 1 1 d . . . . .
 F46A F 0.6484(9) -0.0361(10) 0.4763(7) 0.0388(16) Uani 0.707(16) 1 d . U P A
 1
 F44 F 0.71306(16) -0.28474(11) 0.60443(12) 0.0480(6) Uani 1 1 d . . . . .
 F45 F 0.70294(17) -0.27780(11) 0.71593(12) 0.0507(6) Uani 1 1 d . . . . .
 F32 F 0.56411(13) 0.57066(13) 1.05023(11) 0.0460(5) Uani 1 1 d . . . . .
 F1 F 0.50516(15) -0.11734(15) 0.88833(11) 0.0549(6) Uani 1 1 d . . . . .
 F14 F 0.34415(17) 0.67731(13) 0.95466(12) 0.0551(6) Uani 1 1 d . . . . .
 F8 F 0.38630(17) 0.53014(13) 0.52579(13) 0.0562(6) Uani 1 1 d . . . . .
 F34 F 0.91339(15) 0.58562(14) 1.05904(14) 0.0453(7) Uani 0.888(3) 1 d D U P B
 1
 N1 N 0.72434(14) 0.24154(13) 0.73488(12) 0.0149(5) Uani 1 1 d . . . . .
 F11 F 0.49657(19) 0.18227(13) 0.35678(12) 0.0616(7) Uani 1 1 d . . . . .
 F13 F 0.3375(2) 0.76767(12) 0.87465(13) 0.0692(8) Uani 1 1 d . . . . .
 F35 F 0.95894(17) 0.46616(16) 1.08245(14) 0.0521(8) Uani 0.888(3) 1 d D U P B
 1
 F36 F 0.8408(4) 0.5251(3) 1.1458(4) 0.0566(11) Uani 0.888(3) 1 d D U P B 1
 F2 F 0.62039(16) -0.11452(15) 0.81151(14) 0.0683(8) Uani 1 1 d . . . . .
 F31 F 0.61925(16) 0.63481(13) 0.95597(15) 0.0672(8) Uani 1 1 d . . . . .
 F38 F 1.2449(11) -0.0616(8) 0.9049(12) 0.046(2) Uani 0.55(2) 1 d . U P C 1
 F5 F 0.241(2) -0.0890(13) 0.7539(12) 0.071(5) Uani 0.62(3) 1 d D U P D 1
 F15 F 0.22398(16) 0.71342(16) 0.92126(15) 0.0707(8) Uani 1 1 d . . . . .
 F28 F 1.35454(16) 0.2349(2) 0.80416(16) 0.0883(11) Uani 1 1 d . . . . .
 F17 F 0.15620(15) 0.59115(18) 0.72717(16) 0.0765(9) Uani 1 1 d . . . . .
 F41 F 0.89969(19) -0.22925(17) 0.99477(17) 0.0815(9) Uani 1 1 d . . . . .
 F30 F 1.32889(18) 0.3593(2) 0.79284(15) 0.0824(10) Uani 1 1 d . . . . .
 F48A F 0.5445(5) -0.0004(4) 0.5613(4) 0.0550(15) Uani 0.707(16) 1 d . U P A 1
 F47A F 0.6443(6) 0.0711(2) 0.5242(4) 0.0503(18) Uani 0.707(16) 1 d . U P A 1
 F10 F 0.4973(2) 0.28941(15) 0.29543(12) 0.0820(10) Uani 1 1 d . . . . .
 C9 C 0.61430(18) 0.25094(15) 0.83500(14) 0.0157(6) Uani 1 1 d . . . . .
 C14 C 0.68783(18) 0.20646(15) 0.85414(14) 0.0150(6) Uani 1 1 d . . . . .
 F12 F 0.6110(2) 0.2386(2) 0.33182(16) 0.0950(11) Uani 1 1 d . . . . .
 F7 F 0.3958(3) 0.52724(14) 0.41567(14) 0.0891(11) Uani 1 1 d . . . . .
 C88 C 0.81984(19) 0.42051(16) 0.93319(15) 0.0184(6) Uani 1 1 d . . . . .
 C82 C 0.83193(18) 0.25627(15) 0.81261(14) 0.0157(6) Uani 1 1 d . . . . .
 C16 C 0.57433(18) 0.25007(16) 0.71443(15) 0.0168(6) Uani 1 1 d . . . . .
 C65 C 0.86986(18) 0.08277(16) 0.82093(15) 0.0176(6) Uani 1 1 d . . . . .
 H65 H 0.894187 0.111875 0.849888 0.021 Uiso 1 1 calc R . . . .
 C15 C 0.76707(18) 0.20610(15) 0.79464(14) 0.0150(6) Uani 1 1 d . . . . .
 C87 C 0.91886(18) 0.25162(16) 0.77788(15) 0.0166(6) Uani 1 1 d . . . . .
 H87 H 0.940107 0.215236 0.742240 0.020 Uiso 1 1 calc R . . . .
 C84 C 0.85638(18) 0.36141(15) 0.87950(15) 0.0169(6) Uani 1 1 d . . . . .
 C64 C 0.89762(19) 0.00253(16) 0.81700(15) 0.0197(6) Uani 1 1 d . . . . .
 C62 C 0.80220(19) -0.00297(16) 0.73333(15) 0.0176(6) Uani 1 1 d . . . . .
 C85 C 0.94324(18) 0.35481(15) 0.84455(15) 0.0170(6) Uani 1 1 d . . . . .
 H85 H 0.980967 0.388435 0.854998 0.020 Uiso 1 1 calc R . . . .
 C83 C 0.80226(18) 0.31106(15) 0.86416(14) 0.0155(6) Uani 1 1 d . . . . .
 H83 H 0.743561 0.314023 0.889420 0.019 Uiso 1 1 calc R . . . .
 C60 C 0.80734(18) 0.12055(15) 0.78321(14) 0.0152(6) Uani 1 1 d . . . . .
 C39 C 0.54167(19) 0.41654(16) 0.76387(15) 0.0187(6) Uani 1 1 d . . . . .
 H39 H 0.490963 0.392383 0.764882 0.022 Uiso 1 1 calc R . . . .
 C8 C 0.63334(18) 0.28063(15) 0.75788(15) 0.0162(6) Uani 1 1 d . . . . .
 C86 C 0.97560(18) 0.29913(16) 0.79414(15) 0.0175(6) Uani 1 1 d . . . . .
 F19A F 0.8330(8) 0.7383(4) 0.8244(5) 0.060(2) Uani 0.64(3) 1 d . U P E 1
 C18 C 0.50261(18) 0.14209(16) 0.69270(15) 0.0183(6) Uani 1 1 d . . . . .
 C66 C 0.76672(19) -0.04603(16) 0.68409(15) 0.0194(6) Uani 1 1 d . . . . .
 F3 F 0.5310(3) -0.19398(14) 0.80543(17) 0.0960(12) Uani 1 1 d . . . . .
 C40 C 0.53239(19) 0.49688(16) 0.77085(15) 0.0190(6) Uani 1 1 d . . . . .
 C96 C 1.07025(19) 0.28979(15) 0.76036(16) 0.0188(6) Uani 1 1 d . . . . .
 C38 C 0.62401(18) 0.37090(16) 0.75541(14) 0.0168(6) Uani 1 1 d . . . . .
 C61 C 0.77276(18) 0.07644(15) 0.74118(14) 0.0162(6) Uani 1 1 d . . . . .
 H61 H 0.727662 0.101260 0.717070 0.019 Uiso 1 1 calc R . . . .
 C21 C 0.55301(18) 0.28969(16) 0.65301(15) 0.0189(6) Uani 1 1 d . . . . .
 H21 H 0.568291 0.340635 0.640246 0.023 Uiso 1 1 calc R . . . .
 C13 C 0.68528(19) 0.17182(17) 0.92172(15) 0.0197(6) Uani 1 1 d . . . . .
 H13 H 0.735508 0.139934 0.934259 0.024 Uiso 1 1 calc R . . . .
 C19 C 0.48495(18) 0.18153(17) 0.62988(15) 0.0193(6) Uani 1 1 d . . . . .
 H19 H 0.455882 0.157735 0.600309 0.023 Uiso 1 1 calc R . . . .
 C63 C 0.86451(19) -0.03947(16) 0.77243(15) 0.0203(6) Uani 1 1 d . . . . .
 H63 H 0.884664 -0.093740 0.768621 0.024 Uiso 1 1 calc R . . . .
 C17 C 0.54780(18) 0.17671(16) 0.73388(15) 0.0172(6) Uani 1 1 d . . . . .
 H17 H 0.561026 0.149850 0.776342 0.021 Uiso 1 1 calc R . . . .
 F22A F 1.0410(5) 0.5573(4) 0.6165(4) 0.057(2) Uani 0.58(2) 1 d D U P F 1
 F21A F 0.8187(10) 0.6547(8) 0.9096(4) 0.078(3) Uani 0.64(3) 1 d D U P E 1
 C89 C 0.73464(19) 0.46031(16) 0.93628(16) 0.0212(6) Uani 1 1 d . . . . .
 H89 H 0.700066 0.449388 0.903945 0.025 Uiso 1 1 calc R . . . .
 C20 C 0.50931(18) 0.25523(16) 0.60992(15) 0.0183(6) Uani 1 1 d . . . . .
 C70 C 0.7380(2) -0.16664(17) 0.64417(16) 0.0238(7) Uani 1 1 d . . . . .
 C10 C 0.53640(19) 0.26336(16) 0.88370(16) 0.0208(6) Uani 1 1 d . . . . .
 H10 H 0.485715 0.293747 0.870454 0.025 Uiso 1 1 calc R . . . .
 C41 C 0.60690(19) 0.53323(16) 0.76762(15) 0.0204(6) Uani 1 1 d . . . . .
 H41 H 0.600882 0.587917 0.772713 0.025 Uiso 1 1 calc R . . . .
 C71 C 0.77265(19) -0.12741(16) 0.68958(15) 0.0202(6) Uani 1 1 d . . . . .
 H71 H 0.800808 -0.156356 0.724916 0.024 Uiso 1 1 calc R . . . .
 F23A F 0.9906(9) 0.4549(9) 0.6061(8) 0.145(6) Uani 0.58(2) 1 d D U P F 1
 C44 C 0.44346(19) 0.54376(16) 0.78102(16) 0.0208(6) Uani 1 1 d . . . . .
 F9 F 0.28805(19) 0.48482(15) 0.4879(2) 0.1090(14) Uani 1 1 d . . . . .
 C30 C 0.49060(19) 0.29527(17) 0.54251(16) 0.0214(6) Uani 1 1 d . . . . .
 C43 C 0.69706(19) 0.40840(16) 0.75198(15) 0.0183(6) Uani 1 1 d . . . . .
 H43 H 0.753621 0.378209 0.746086 0.022 Uiso 1 1 calc R . . . .
 C49 C 0.4183(2) 0.59848(16) 0.83225(16) 0.0214(6) Uani 1 1 d . . . . .
 H49 H 0.458487 0.606741 0.860961 0.026 Uiso 1 1 calc R . . . .
 C93 C 0.8684(2) 0.43754(17) 0.98118(16) 0.0236(7) Uani 1 1 d . . . . .
 H93 H 0.926561 0.411524 0.979989 0.028 Uiso 1 1 calc R . . . .
 C42 C 0.68991(19) 0.48916(16) 0.75694(16) 0.0204(6) Uani 1 1 d . . . . .
 C22 C 0.4697(2) 0.06616(17) 0.71652(15) 0.0216(6) Uani 1 1 d . . . . .
 C74 C 0.9607(2) -0.03679(17) 0.86198(17) 0.0246(7) Uani 1 1 d . . . . .
 C90 C 0.7001(2) 0.51546(17) 0.98590(17) 0.0256(7) Uani 1 1 d . . . . .
 C12 C 0.6079(2) 0.18464(18) 0.97077(16) 0.0245(7) Uani 1 1 d . . . . .
 H12 H 0.605178 0.161905 1.017598 0.029 Uiso 1 1 calc R . . . .
 C98 C 1.2223(2) 0.28820(18) 0.76895(17) 0.0255(7) Uani 1 1 d . . . . .
 C97 C 1.13394(19) 0.29556(16) 0.80043(16) 0.0209(6) Uani 1 1 d . . . . .
 H97 H 1.116869 0.304559 0.849393 0.025 Uiso 1 1 calc R . . . .
 C35 C 0.4451(2) 0.37101(17) 0.54054(17) 0.0248(7) Uani 1 1 d . . . . .
 H35 H 0.426985 0.398127 0.582848 0.030 Uiso 1 1 calc R . . . .
 C11 C 0.5340(2) 0.23062(18) 0.95184(16) 0.0241(7) Uani 1 1 d . . . . .
 H11 H 0.481607 0.239556 0.986059 0.029 Uiso 1 1 calc R . . . .
 C31 C 0.5160(2) 0.25699(18) 0.48006(16) 0.0258(7) Uani 1 1 d . . . . .
 H31 H 0.546749 0.205320 0.480448 0.031 Uiso 1 1 calc R . . . .
 C53 C 0.7784(2) 0.58060(17) 0.79710(18) 0.0267(7) Uani 1 1 d . . . . .
 H53 H 0.728189 0.600187 0.830177 0.032 Uiso 1 1 calc R . . . .
 C23 C 0.5177(2) 0.00822(16) 0.75394(15) 0.0232(7) Uani 1 1 d . . . . .
 H23 H 0.572688 0.016633 0.763361 0.028 Uiso 1 1 calc R . . . .
 C100 C 1.1863(2) 0.26787(19) 0.65854(17) 0.0272(7) Uani 1 1 d . . . . .
 C101 C 1.09762(19) 0.27529(17) 0.68915(16) 0.0230(6) Uani 1 1 d . . . . .
 H101 H 1.055416 0.270409 0.661110 0.028 Uiso 1 1 calc R . . . .
 C48 C 0.3348(2) 0.64123(17) 0.84191(17) 0.0271(7) Uani 1 1 d . . . . .
 C67 C 0.7250(2) -0.00601(17) 0.63110(16) 0.0263(7) Uani 1 1 d . . . . .
 H67 H 0.721213 0.049306 0.625268 0.032 Uiso 1 1 calc R . . . .
 F6 F 0.2927(11) -0.0716(8) 0.6450(5) 0.072(3) Uani 0.62(3) 1 d D U P D 1
 C52 C 0.7721(2) 0.52446(16) 0.75195(17) 0.0243(7) Uani 1 1 d . . . . .
 F24A F 1.0675(6) 0.4602(5) 0.6836(6) 0.097(3) Uani 0.58(2) 1 d D U P F 1
 C68 C 0.6891(2) -0.04588(19) 0.58674(17) 0.0319(8) Uani 1 1 d . . . . .
 C32 C 0.4969(2) 0.2938(2) 0.41653(17) 0.0312(8) Uani 1 1 d . . . . .
 C69 C 0.6959(2) -0.12641(18) 0.59283(17) 0.0284(7) Uani 1 1 d . . . . .
 H69 H 0.671868 -0.153633 0.562191 0.034 Uiso 1 1 calc R . . . .
 F18 F 0.24526(19) 0.4930(2) 0.6854(2) 0.1177(16) Uani 1 1 d . . . . .
 C92 C 0.8328(2) 0.49238(19) 1.03103(17) 0.0295(7) Uani 1 1 d D . . . .
 F39 F 1.1721(6) 0.0263(10) 0.9705(8) 0.075(4) Uani 0.55(2) 1 d . U P C 1
 C45 C 0.3841(2) 0.53321(19) 0.73925(17) 0.0281(7) Uani 1 1 d . . . . .
 H45 H 0.400107 0.495889 0.704040 0.034 Uiso 1 1 calc R . . . .
 C27 C 0.3899(2) 0.05197(19) 0.70337(17) 0.0285(7) Uani 1 1 d . . . . .
 H27 H 0.356372 0.090608 0.677953 0.034 Uiso 1 1 calc R . . . .
 C1 C 0.7725(2) 0.26347(19) 0.66714(16) 0.0264(7) Uani 1 1 d . . . . .
 H1 H 0.781542 0.319678 0.661913 0.032 Uiso 1 1 calc R . . . .
 C34 C 0.4261(2) 0.40688(19) 0.47721(18) 0.0296(7) Uani 1 1 d . . . . .
 C79 C 1.0348(2) -0.00479(18) 0.86711(18) 0.0295(7) Uani 1 1 d . . . . .
 H79 H 1.047129 0.042069 0.840268 0.035 Uiso 1 1 calc R . . . .
 C72 C 0.7457(2) -0.25428(18) 0.65267(18) 0.0317(8) Uani 1 1 d . . . . .
 C33 C 0.4517(2) 0.3683(2) 0.41509(18) 0.0338(8) Uani 1 1 d . . . . .
 H33 H 0.438206 0.392931 0.371889 0.041 Uiso 1 1 calc R . . . .
 C51 C 0.3101(2) 0.70063(18) 0.89696(19) 0.0320(8) Uani 1 1 d . . . . .
 F16 F 0.2599(2) 0.6075(3) 0.63872(17) 0.1244(17) Uani 1 1 d . . . . .
 C54 C 0.8578(2) 0.60850(18) 0.7943(2) 0.0342(8) Uani 1 1 d . . . . .
 C78 C 1.0915(2) -0.0410(2) 0.9115(2) 0.0366(8) Uani 1 1 d . . . . .
 C91 C 0.7483(2) 0.53149(19) 1.03367(18) 0.0312(8) Uani 1 1 d . . . . .
 H91 H 0.724176 0.568805 1.068058 0.037 Uiso 1 1 calc R . . . .
 C57 C 0.8462(2) 0.49854(18) 0.7028(2) 0.0333(8) Uani 1 1 d . . . . .
 H57 H 0.842782 0.460795 0.670904 0.040 Uiso 1 1 calc R . . . .
 C24 C 0.4856(2) -0.06146(18) 0.77740(16) 0.0303(8) Uani 1 1 d . . . . .
 C75 C 0.9435(2) -0.10536(19) 0.90158(19) 0.0339(8) Uani 1 1 d . . . . .
 H75 H 0.893385 -0.128293 0.897919 0.041 Uiso 1 1 calc R . . . .
 C99 C 1.2491(2) 0.27449(18) 0.69805(17) 0.0281(7) Uani 1 1 d . . . . .
 H99 H 1.309544 0.269708 0.676870 0.034 Uiso 1 1 calc R . . . .
 C47 C 0.2761(2) 0.6308(2) 0.79990(19) 0.0348(8) Uani 1 1 d . . . . .
 H47 H 0.219172 0.660401 0.806249 0.042 Uiso 1 1 calc R . . . .
 C94 C 0.6118(2) 0.5622(2) 0.9847(2) 0.0377(9) Uani 1 1 d . . . . .
 C29 C 0.5355(3) -0.1216(2) 0.81956(18) 0.0400(9) Uani 1 1 d . . . . .
 C77 C 1.0734(3) -0.1087(2) 0.9513(2) 0.0417(9) Uani 1 1 d . . . . .
 H77 H 1.111603 -0.133181 0.981778 0.050 Uiso 1 1 calc R . . . .
 C25 C 0.4058(3) -0.0746(2) 0.76463(18) 0.0381(9) Uani 1 1 d . . . . .
 H25 H 0.383609 -0.122104 0.781587 0.046 Uiso 1 1 calc R . . . .
 F4 F 0.2215(6) 0.0299(5) 0.6961(10) 0.076(4) Uani 0.62(3) 1 d D U P D 1
 F20A F 0.9458(4) 0.6699(7) 0.8514(6) 0.080(3) Uani 0.64(3) 1 d D U P E 1
 F40 F 1.0316(2) -0.27506(19) 0.9663(3) 0.139(2) Uani 1 1 d . . . . .
 C26 C 0.3585(3) -0.0182(2) 0.72695(19) 0.0380(9) Uani 1 1 d . . . . .
 C46 C 0.3010(2) 0.5771(2) 0.7487(2) 0.0376(8) Uani 1 1 d . . . . .
 C36 C 0.5254(3) 0.2508(2) 0.35089(19) 0.0410(9) Uani 1 1 d . . . . .
 C102 C 1.2907(2) 0.2945(2) 0.8116(2) 0.0381(9) Uani 1 1 d . . . . .
 C56 C 0.9249(2) 0.5269(2) 0.6996(2) 0.0434(10) Uani 1 1 d . . . . .
 C55 C 0.9312(2) 0.58168(19) 0.7462(2) 0.0424(10) Uani 1 1 d . . . . .
 H55 H 0.985427 0.600389 0.744904 0.051 Uiso 1 1 calc R . . . .
 C76 C 0.9993(3) -0.1405(2) 0.9465(2) 0.0436(9) Uani 1 1 d . . . . .
 F37 F 1.1957(6) 0.0483(4) 0.8596(8) 0.059(3) Uani 0.55(2) 1 d . U P C 1
 C58 C 0.8620(3) 0.6689(2) 0.8445(2) 0.0456(9) Uani 1 1 d D U . . .
 C103 C 1.2136(2) 0.2546(2) 0.58237(19) 0.0444(8) Uani 1 1 d D U . . .
 C37 C 0.3732(3) 0.4865(2) 0.4768(2) 0.0457(10) Uani 1 1 d . . . . .
 C2 C 0.8450(2) 0.2113(2) 0.62490(19) 0.0382(8) Uani 1 1 d . . . . .
 H2 H 0.856922 0.156620 0.645346 0.046 Uiso 1 1 calc R . . . .
 C7 C 0.7581(2) 0.2329(2) 0.60018(19) 0.0396(9) Uani 1 1 d . . . . .
 H7 H 0.720450 0.190222 0.607860 0.047 Uiso 1 1 calc R . . . .
 C95 C 0.8856(3) 0.5160(2) 1.0797(2) 0.0365(10) Uani 0.888(3) 1 d D U P B 1
 C3 C 0.9250(2) 0.2466(2) 0.5843(2) 0.0426(9) Uani 1 1 d . . . . .
 H3A H 0.934265 0.290237 0.610611 0.051 Uiso 1 1 calc R . . . .
 H3B H 0.977383 0.206372 0.582696 0.051 Uiso 1 1 calc R . . . .
 C81 C 1.1779(15) -0.0086(13) 0.9100(9) 0.041(2) Uani 0.55(2) 1 d . U P C 1
 C73A C 0.6310(7) -0.0024(4) 0.5372(4) 0.0278(16) Uani 0.707(16) 1 d . U P A 1
 C6 C 0.7530(3) 0.2839(2) 0.5328(2) 0.0415(9) Uani 1 1 d . . . . .
 H6A H 0.697883 0.321001 0.540098 0.050 Uiso 1 1 calc R . . . .
 H6B H 0.750601 0.250284 0.494381 0.050 Uiso 1 1 calc R . . . .
 F42 F 0.9911(4) -0.2085(3) 1.0569(2) 0.161(2) Uani 1 1 d . . . . .
 C5 C 0.8310(3) 0.3305(3) 0.5090(2) 0.0505(10) Uani 1 1 d . . . . .
 H5A H 0.829617 0.354543 0.460690 0.061 Uiso 1 1 calc R . . . .
 H5B H 0.826038 0.372997 0.541292 0.061 Uiso 1 1 calc R . . . .
 C28 C 0.2749(11) -0.0367(8) 0.7060(7) 0.0545(17) Uani 0.62(3) 1 d D U P D 1
 C50 C 0.2403(3) 0.5662(4) 0.7005(3) 0.0720(16) Uani 1 1 d . . . . .
 C4 C 0.9179(3) 0.2767(3) 0.5093(2) 0.0517(11) Uani 1 1 d . . . . .
 H4A H 0.921073 0.232150 0.479673 0.062 Uiso 1 1 calc R . . . .
 H4B H 0.967501 0.305834 0.489111 0.062 Uiso 1 1 calc R . . . .
 C59 C 1.0031(11) 0.5004(8) 0.6535(8) 0.063(2) Uani 0.58(2) 1 d D U P F 1
 C80 C 0.9787(3) -0.2129(3) 0.9906(3) 0.0753(16) Uani 1 1 d . . . . .
 F47 F 0.6973(15) 0.0644(7) 0.4996(7) 0.053(4) Uani 0.293(16) 1 d . U P A 2
 C73 C 0.6657(14) -0.0020(11) 0.5212(11) 0.0278(16) Uani 0.293(16) 1 d . U P A
 2
 F48 F 0.5766(13) 0.0239(12) 0.5457(8) 0.059(4) Uani 0.293(16) 1 d . U P A 2
 F46 F 0.668(3) -0.042(3) 0.466(2) 0.062(8) Uani 0.293(16) 1 d . U P A 2
 F25 F 1.1540(7) 0.2734(8) 0.5445(7) 0.083(5) Uani 0.418(10) 1 d D U P G 1
 F26 F 1.2882(5) 0.2711(9) 0.5515(5) 0.097(5) Uani 0.418(10) 1 d D U P G 1
 F27 F 1.2265(9) 0.1736(4) 0.5767(4) 0.114(5) Uani 0.418(10) 1 d D U P G 1
 F26A F 1.2917(3) 0.2192(5) 0.5633(4) 0.069(2) Uani 0.582(10) 1 d D U P G 2
 F25A F 1.1593(5) 0.2297(6) 0.5519(5) 0.080(3) Uani 0.582(10) 1 d D U P G 2
 F27A F 1.2233(7) 0.3264(3) 0.5459(3) 0.103(3) Uani 0.582(10) 1 d D U P G 2
 C95A C 0.8847(16) 0.4811(15) 1.0935(13) 0.0365(10) Uani 0.112(3) 1 d D . P B
 2
 F35A F 0.9150(13) 0.4155(10) 1.1282(10) 0.0521(8) Uani 0.112(3) 1 d D U P B 2
 F34A F 0.9545(13) 0.5201(12) 1.0779(11) 0.0453(7) Uani 0.112(3) 1 d D U P B 2
 F36A F 0.831(3) 0.522(2) 1.144(4) 0.0566(11) Uani 0.112(3) 1 d D U P B 2
 F19 F 0.7945(16) 0.7282(11) 0.8437(16) 0.092(6) Uani 0.36(3) 1 d D U P E 2
 F21 F 0.857(2) 0.6424(14) 0.9074(9) 0.090(6) Uani 0.36(3) 1 d D U P E 2
 F20 F 0.9295(16) 0.7077(16) 0.8262(12) 0.099(7) Uani 0.36(3) 1 d D U P E 2
 F23 F 0.9924(9) 0.4354(6) 0.6086(8) 0.056(3) Uani 0.42(2) 1 d D U P F 2
 C59A C 1.0042(16) 0.4989(11) 0.6369(14) 0.063(2) Uani 0.42(2) 1 d D U P F 2
 F22 F 1.0201(16) 0.5512(7) 0.5856(15) 0.170(9) Uani 0.42(2) 1 d D U P F 2
 F24 F 1.0756(10) 0.4787(13) 0.6643(16) 0.136(7) Uani 0.42(2) 1 d D U P F 2
 F38A F 1.2435(16) -0.0453(15) 0.8931(15) 0.075(6) Uani 0.45(2) 1 d . U P C 2
 C81A C 1.1634(17) -0.0068(17) 0.9276(11) 0.041(2) Uani 0.45(2) 1 d . U P C 2
 F39A F 1.1718(7) -0.0103(8) 0.9951(6) 0.055(3) Uani 0.45(2) 1 d . U P C 2
 F37A F 1.1628(9) 0.0664(6) 0.9050(10) 0.072(5) Uani 0.45(2) 1 d . U P C 2
 C28A C 0.2686(18) -0.0235(14) 0.7172(10) 0.0545(17) Uani 0.38(3) 1 d D U P D
 2
 F6A F 0.2645(15) -0.033(2) 0.6506(8) 0.080(6) Uani 0.38(3) 1 d D U P D 2
 F4A F 0.2059(7) 0.0330(8) 0.7422(18) 0.086(5) Uani 0.38(3) 1 d D U P D 2
 F5A F 0.225(3) -0.078(2) 0.7531(17) 0.069(6) Uani 0.38(3) 1 d D U P D 2

loop_
  _atom_site_aniso_label
  _atom_site_aniso_U_11
  _atom_site_aniso_U_22
  _atom_site_aniso_U_33
  _atom_site_aniso_U_23
  _atom_site_aniso_U_13
  _atom_site_aniso_U_12
 F29 0.0256(11) 0.0693(15) 0.0408(12) -0.0224(11) -0.0136(9) -0.0004(10)
 F43 0.0488(14) 0.0207(10) 0.0899(18) -0.0118(11) -0.0254(12) 0.0061(9)
 F33 0.0319(12) 0.0662(15) 0.0463(13) -0.0263(11) -0.0157(10) 0.0177(10)
 F46A 0.058(3) 0.036(3) 0.022(4) -0.012(2) -0.018(2) 0.011(2)
 F44 0.0811(17) 0.0221(10) 0.0544(13) -0.0073(9) -0.0386(12) -0.0134(10)
 F45 0.0811(17) 0.0243(10) 0.0469(13) 0.0071(9) -0.0099(12) -0.0153(11)
 F32 0.0299(11) 0.0598(14) 0.0461(13) -0.0294(11) 0.0015(10) 0.0044(10)
 F1 0.0535(14) 0.0770(17) 0.0275(11) 0.0111(11) 0.0012(10) -0.0073(12)
 F14 0.0851(18) 0.0393(12) 0.0393(13) -0.0139(10) -0.0124(12) 0.0044(12)
 F8 0.0717(17) 0.0331(12) 0.0625(15) -0.0053(11) -0.0192(13) 0.0069(11)
 F34 0.0348(13) 0.0458(14) 0.0638(16) -0.0281(12) -0.0142(12) -0.0120(11)
 N1 0.0129(12) 0.0148(11) 0.0171(12) -0.0018(9) -0.0040(9) -0.0003(9)
 F11 0.108(2) 0.0417(13) 0.0372(13) -0.0111(10) 0.0011(13) -0.0309(13)
 F13 0.125(2) 0.0237(11) 0.0502(14) -0.0046(10) 0.0157(15) -0.0222(13)
 F35 0.0582(17) 0.0480(17) 0.0602(17) -0.0254(13) -0.0410(14) 0.0120(13)
 F36 0.056(2) 0.0863(19) 0.0342(13) -0.0241(13) -0.0090(16) -0.0182(15)
 F2 0.0462(15) 0.0680(17) 0.0663(17) 0.0410(13) 0.0145(12) 0.0117(12)
 F31 0.0535(15) 0.0337(12) 0.098(2) 0.0033(13) 0.0053(14) 0.0179(11)
 F38 0.023(3) 0.054(4) 0.060(6) -0.007(3) -0.014(3) 0.002(2)
 F5 0.076(11) 0.095(6) 0.060(5) 0.003(4) -0.014(5) -0.071(7)
 F15 0.0413(14) 0.0793(19) 0.086(2) -0.0463(16) 0.0075(13) 0.0060(13)
 F28 0.0410(14) 0.138(3) 0.090(2) -0.077(2) -0.0400(14) 0.0507(16)
 F17 0.0303(13) 0.113(2) 0.092(2) -0.0451(18) -0.0352(13) 0.0232(14)
 F41 0.0650(19) 0.0729(19) 0.102(2) 0.0560(17) -0.0274(16) -0.0135(15)
 F30 0.0649(18) 0.128(3) 0.0765(19) 0.0041(18) -0.0276(15) -0.0689(19)
 F48A 0.031(3) 0.089(4) 0.044(3) -0.003(2) -0.019(2) 0.008(2)
 F47A 0.081(5) 0.0245(16) 0.056(3) 0.0027(17) -0.047(3) 0.002(2)
 F10 0.170(3) 0.0539(16) 0.0297(13) 0.0023(11) -0.0355(16) -0.0218(18)
 C9 0.0176(15) 0.0130(13) 0.0185(14) -0.0061(11) -0.0047(12) -0.0038(11)
 C14 0.0159(14) 0.0117(13) 0.0191(14) -0.0060(11) -0.0040(11) -0.0030(11)
 F12 0.065(2) 0.155(3) 0.0681(19) -0.062(2) 0.0132(15) -0.027(2)
 F7 0.181(3) 0.0305(13) 0.0514(16) 0.0166(11) -0.0314(18) 0.0014(16)
 C88 0.0204(15) 0.0143(13) 0.0207(15) -0.0017(11) -0.0023(12) -0.0045(11)
 C82 0.0154(14) 0.0134(13) 0.0187(14) 0.0017(11) -0.0066(11) -0.0005(11)
 C16 0.0123(14) 0.0162(13) 0.0215(15) -0.0048(11) -0.0024(11) -0.0002(11)
 C65 0.0175(15) 0.0171(14) 0.0207(15) -0.0031(11) -0.0067(12) -0.0047(11)
 C15 0.0147(14) 0.0131(13) 0.0180(14) -0.0016(11) -0.0057(11) -0.0009(11)
 C87 0.0165(15) 0.0158(13) 0.0174(14) -0.0022(11) -0.0044(11) 0.0007(11)
 C84 0.0191(15) 0.0139(13) 0.0185(14) -0.0001(11) -0.0069(12) -0.0012(11)
 C64 0.0194(15) 0.0166(14) 0.0231(15) 0.0010(12) -0.0069(12) 0.0005(12)
 C62 0.0192(15) 0.0145(13) 0.0186(14) -0.0004(11) -0.0023(12) -0.0029(11)
 C85 0.0186(15) 0.0141(13) 0.0201(14) -0.0013(11) -0.0067(12) -0.0042(11)
 C83 0.0137(14) 0.0148(13) 0.0184(14) -0.0012(11) -0.0043(11) -0.0010(11)
 C60 0.0142(14) 0.0143(13) 0.0163(14) 0.0008(11) -0.0010(11) -0.0028(11)
 C39 0.0177(15) 0.0172(14) 0.0234(15) -0.0027(11) -0.0076(12) -0.0034(11)
 C8 0.0142(14) 0.0136(13) 0.0215(15) -0.0026(11) -0.0051(12) -0.0013(11)
 C86 0.0161(14) 0.0168(14) 0.0200(15) 0.0014(11) -0.0053(12) -0.0026(11)
 F19A 0.109(6) 0.024(2) 0.057(3) 0.001(2) -0.044(4) -0.006(3)
 C18 0.0143(14) 0.0157(14) 0.0252(15) -0.0040(11) -0.0014(12) -0.0041(11)
 C66 0.0205(15) 0.0184(14) 0.0197(15) -0.0038(11) -0.0033(12) -0.0028(12)
 F3 0.189(4) 0.0215(12) 0.091(2) 0.0020(13) -0.068(2) -0.0054(16)
 C40 0.0191(15) 0.0186(14) 0.0202(15) -0.0012(11) -0.0080(12) 0.0004(12)
 C96 0.0174(15) 0.0126(13) 0.0270(16) -0.0028(11) -0.0042(12) -0.0027(11)
 C38 0.0197(15) 0.0148(13) 0.0179(14) -0.0009(11) -0.0077(12) -0.0031(11)
 C61 0.0165(14) 0.0154(13) 0.0172(14) -0.0009(11) -0.0055(11) -0.0010(11)
 C21 0.0176(15) 0.0130(13) 0.0257(16) -0.0008(11) -0.0043(12) -0.0011(11)
 C13 0.0176(15) 0.0219(15) 0.0212(15) -0.0026(12) -0.0066(12) -0.0034(12)
 C19 0.0159(15) 0.0223(15) 0.0222(15) -0.0065(12) -0.0058(12) -0.0045(12)
 C63 0.0226(16) 0.0135(13) 0.0247(16) -0.0009(11) -0.0065(13) 0.0009(12)
 C17 0.0149(14) 0.0164(14) 0.0199(14) -0.0023(11) -0.0031(12) -0.0001(11)
 F22A 0.038(3) 0.058(3) 0.067(4) -0.003(3) 0.016(3) -0.020(2)
 F21A 0.134(8) 0.078(6) 0.042(3) -0.003(3) -0.015(3) -0.078(6)
 C89 0.0217(16) 0.0195(14) 0.0238(16) -0.0036(12) -0.0046(13) -0.0060(12)
 C20 0.0149(14) 0.0167(14) 0.0235(15) -0.0030(11) -0.0050(12) -0.0001(11)
 C70 0.0269(17) 0.0185(15) 0.0262(16) -0.0035(12) -0.0054(13) -0.0025(12)
 C10 0.0180(15) 0.0183(14) 0.0271(16) -0.0060(12) -0.0051(13) -0.0018(12)
 C41 0.0266(16) 0.0126(13) 0.0238(15) -0.0014(11) -0.0096(13) -0.0016(12)
 C71 0.0223(16) 0.0157(14) 0.0231(15) -0.0015(12) -0.0071(12) 0.0002(12)
 F23A 0.076(6) 0.174(10) 0.187(10) -0.135(9) 0.076(6) -0.081(7)
 C44 0.0206(16) 0.0148(14) 0.0270(16) 0.0015(12) -0.0066(13) -0.0013(12)
 F9 0.0548(18) 0.0411(15) 0.244(5) 0.014(2) -0.074(2) 0.0011(13)
 C30 0.0204(16) 0.0216(15) 0.0257(16) 0.0001(12) -0.0083(13) -0.0094(12)
 C43 0.0169(15) 0.0163(14) 0.0215(15) 0.0000(11) -0.0056(12) -0.0003(11)
 C49 0.0219(16) 0.0171(14) 0.0266(16) -0.0014(12) -0.0078(13) -0.0028(12)
 C93 0.0209(16) 0.0246(16) 0.0274(16) -0.0078(13) -0.0045(13) -0.0060(13)
 C42 0.0211(16) 0.0171(14) 0.0256(16) 0.0001(12) -0.0086(13) -0.0057(12)
 C22 0.0264(17) 0.0201(15) 0.0189(15) -0.0066(12) -0.0001(12) -0.0077(12)
 C74 0.0272(17) 0.0181(15) 0.0299(17) -0.0064(12) -0.0133(14) 0.0055(13)
 C90 0.0241(17) 0.0221(15) 0.0299(17) -0.0080(13) -0.0001(14) -0.0034(13)
 C12 0.0286(17) 0.0255(16) 0.0195(15) -0.0020(12) -0.0016(13) -0.0077(13)
 C98 0.0179(16) 0.0240(16) 0.0361(18) -0.0104(13) -0.0059(14) -0.0018(12)
 C97 0.0177(15) 0.0203(14) 0.0266(16) -0.0094(12) -0.0055(12) -0.0026(12)
 C35 0.0271(17) 0.0217(15) 0.0289(17) -0.0003(13) -0.0097(14) -0.0082(13)
 C11 0.0199(16) 0.0269(16) 0.0243(16) -0.0084(13) 0.0041(13) -0.0060(13)
 C31 0.0270(17) 0.0255(16) 0.0279(17) -0.0015(13) -0.0089(14) -0.0083(13)
 C53 0.0283(17) 0.0179(15) 0.0376(18) 0.0078(13) -0.0161(15) -0.0074(13)
 C23 0.0297(17) 0.0180(14) 0.0213(15) -0.0050(12) 0.0006(13) -0.0063(13)
 C100 0.0213(16) 0.0297(17) 0.0309(18) -0.0085(14) -0.0009(14) -0.0058(13)
 C101 0.0170(15) 0.0265(16) 0.0271(16) -0.0072(13) -0.0042(13) -0.0046(12)
 C48 0.0263(17) 0.0192(15) 0.0328(18) 0.0006(13) -0.0031(14) 0.0022(13)
 C67 0.044(2) 0.0142(14) 0.0210(16) -0.0031(12) -0.0117(14) 0.0018(13)
 F6 0.096(7) 0.097(6) 0.045(3) -0.003(4) -0.023(3) -0.069(5)
 C52 0.0235(17) 0.0144(14) 0.0369(18) 0.0067(13) -0.0122(14) -0.0046(12)
 F24A 0.035(3) 0.031(3) 0.192(7) 0.029(4) 0.029(4) 0.013(2)
 C68 0.047(2) 0.0236(16) 0.0273(17) -0.0058(13) -0.0174(16) 0.0029(15)
 C32 0.0355(19) 0.0369(19) 0.0275(17) 0.0020(14) -0.0117(15) -0.0196(15)
 C69 0.0350(19) 0.0255(16) 0.0283(17) -0.0090(13) -0.0124(15) -0.0027(14)
 F18 0.0589(18) 0.147(3) 0.171(4) -0.122(3) -0.076(2) 0.042(2)
 C92 0.0285(18) 0.0341(18) 0.0292(18) -0.0138(14) -0.0037(14) -0.0098(14)
 F39 0.049(3) 0.114(9) 0.073(7) -0.061(6) -0.020(4) -0.003(5)
 C45 0.0248(17) 0.0277(17) 0.0325(18) -0.0077(14) -0.0100(14) 0.0029(13)
 C27 0.0294(18) 0.0322(17) 0.0278(17) -0.0026(14) -0.0062(14) -0.0146(14)
 C1 0.0243(17) 0.0283(16) 0.0278(17) -0.0031(13) -0.0060(14) -0.0050(13)
 C34 0.0320(19) 0.0271(17) 0.0343(19) 0.0077(14) -0.0171(15) -0.0100(14)
 C79 0.0294(18) 0.0218(16) 0.0399(19) -0.0091(14) -0.0170(15) 0.0061(13)
 C72 0.043(2) 0.0200(16) 0.037(2) -0.0045(14) -0.0173(16) -0.0064(15)
 C33 0.041(2) 0.0339(19) 0.0339(19) 0.0111(15) -0.0200(16) -0.0196(16)
 C51 0.0287(19) 0.0216(16) 0.043(2) -0.0047(14) -0.0016(16) 0.0005(14)
 F16 0.071(2) 0.242(5) 0.059(2) -0.020(3) -0.0454(17) 0.030(3)
 C54 0.036(2) 0.0202(16) 0.053(2) 0.0091(15) -0.0235(18) -0.0111(14)
 C78 0.0317(19) 0.0361(19) 0.046(2) -0.0155(16) -0.0209(17) 0.0074(15)
 C91 0.0330(19) 0.0274(17) 0.0336(18) -0.0162(14) 0.0015(15) -0.0069(14)
 C57 0.0279(18) 0.0156(15) 0.057(2) -0.0006(15) -0.0076(16) -0.0067(13)
 C24 0.047(2) 0.0217(16) 0.0207(16) -0.0054(13) 0.0031(15) -0.0088(15)
 C75 0.038(2) 0.0236(16) 0.043(2) 0.0058(15) -0.0214(17) 0.0013(14)
 C99 0.0174(16) 0.0304(17) 0.0361(19) -0.0121(14) 0.0015(14) -0.0044(13)
 C47 0.0206(17) 0.0371(19) 0.044(2) -0.0047(16) -0.0096(15) 0.0112(14)
 C94 0.034(2) 0.0325(19) 0.041(2) -0.0136(16) 0.0040(17) 0.0049(15)
 C29 0.060(3) 0.0260(18) 0.0282(19) 0.0042(14) 0.0066(17) -0.0106(17)
 C77 0.044(2) 0.040(2) 0.042(2) -0.0040(17) -0.0269(18) 0.0165(17)
 C25 0.060(3) 0.0279(18) 0.0285(18) -0.0032(14) 0.0020(17) -0.0253(17)
 F4 0.049(4) 0.083(4) 0.113(10) 0.010(4) -0.038(5) -0.040(3)
 F20A 0.059(3) 0.062(5) 0.143(6) -0.021(4) -0.065(3) -0.016(3)
 F40 0.065(2) 0.0542(19) 0.269(6) 0.074(3) -0.010(3) 0.0110(16)
 C26 0.045(2) 0.042(2) 0.0333(19) -0.0059(16) -0.0031(17) -0.0271(18)
 C46 0.0255(18) 0.045(2) 0.044(2) -0.0119(17) -0.0161(16) 0.0070(16)
 C36 0.054(3) 0.045(2) 0.0277(19) -0.0011(16) -0.0074(17) -0.0191(19)
 C102 0.0176(17) 0.055(2) 0.043(2) -0.0185(18) -0.0045(15) -0.0026(16)
 C56 0.0245(19) 0.0219(17) 0.083(3) 0.0030(18) -0.0065(19) -0.0068(14)
 C55 0.031(2) 0.0233(17) 0.079(3) 0.0115(18) -0.022(2) -0.0129(15)
 C76 0.045(2) 0.036(2) 0.051(2) 0.0086(17) -0.0240(19) 0.0040(17)
 F37 0.044(4) 0.056(3) 0.091(7) 0.000(3) -0.039(4) -0.017(3)
 C58 0.054(2) 0.0366(19) 0.059(2) 0.0065(17) -0.030(2) -0.0262(16)
 C103 0.0258(16) 0.073(2) 0.034(2) -0.0156(17) 0.0024(13) -0.0104(16)
 C37 0.051(3) 0.0306(19) 0.062(3) 0.0160(19) -0.030(2) -0.0110(17)
 C2 0.039(2) 0.037(2) 0.038(2) 0.0000(16) -0.0098(17) -0.0032(16)
 C7 0.035(2) 0.047(2) 0.037(2) -0.0098(17) -0.0067(16) -0.0043(17)
 C95 0.031(2) 0.041(2) 0.041(2) -0.022(2) -0.0089(17) -0.0011(19)
 C3 0.033(2) 0.054(2) 0.039(2) -0.0009(18) -0.0065(17) -0.0029(18)
 C81 0.035(6) 0.048(3) 0.045(6) -0.019(4) -0.021(5) 0.005(3)
 C73A 0.031(5) 0.0248(19) 0.027(4) -0.012(2) -0.008(3) 0.009(3)
 C6 0.039(2) 0.048(2) 0.037(2) 0.0018(17) -0.0118(17) -0.0022(17)
 F42 0.240(6) 0.166(4) 0.117(3) 0.099(3) -0.122(4) -0.100(4)
 C5 0.047(2) 0.062(3) 0.042(2) 0.011(2) -0.0104(19) -0.007(2)
 C28 0.067(4) 0.065(5) 0.047(4) 0.002(3) -0.015(3) -0.053(3)
 C50 0.036(3) 0.118(5) 0.064(3) -0.042(3) -0.031(2) 0.029(3)
 C4 0.053(3) 0.062(3) 0.039(2) 0.005(2) -0.0059(19) -0.014(2)
 C59 0.032(2) 0.041(2) 0.111(7) -0.021(3) 0.019(4) -0.019(2)
 C80 0.062(3) 0.071(3) 0.092(4) 0.049(3) -0.043(3) 0.000(3)
 F47 0.091(10) 0.034(5) 0.044(6) 0.016(4) -0.036(7) -0.019(6)
 C73 0.031(5) 0.0248(19) 0.027(4) -0.012(2) -0.008(3) 0.009(3)
 F48 0.041(7) 0.083(12) 0.046(7) -0.002(6) -0.016(6) 0.025(7)
 F46 0.13(2) 0.037(8) 0.027(9) -0.013(6) -0.029(12) 0.007(14)
 F25 0.045(5) 0.167(12) 0.032(4) -0.035(7) -0.008(4) 0.019(7)
 F26 0.055(5) 0.213(15) 0.036(4) -0.038(9) 0.018(4) -0.081(8)
 F27 0.205(14) 0.079(4) 0.042(4) -0.035(4) 0.025(6) -0.007(5)
 F26A 0.031(3) 0.129(6) 0.045(4) -0.047(4) 0.001(2) 0.010(3)
 F25A 0.036(4) 0.177(9) 0.038(4) -0.044(6) 0.006(2) -0.046(5)
 F27A 0.167(9) 0.090(4) 0.033(3) -0.002(2) 0.030(4) -0.018(4)
 C95A 0.031(2) 0.041(2) 0.041(2) -0.022(2) -0.0089(17) -0.0011(19)
 F35A 0.0582(17) 0.0480(17) 0.0602(17) -0.0254(13) -0.0410(14) 0.0120(13)
 F34A 0.0348(13) 0.0458(14) 0.0638(16) -0.0281(12) -0.0142(12) -0.0120(11)
 F36A 0.056(2) 0.0863(19) 0.0342(13) -0.0241(13) -0.0090(16) -0.0182(15)
 F19 0.116(9) 0.052(7) 0.128(15) -0.049(7) -0.072(10) 0.011(7)
 F21 0.147(17) 0.069(7) 0.067(5) 0.019(5) -0.050(6) -0.032(10)
 F20 0.100(9) 0.088(12) 0.129(11) -0.034(9) -0.006(8) -0.078(10)
 F23 0.033(5) 0.030(4) 0.098(7) -0.012(4) 0.014(4) -0.009(3)
 C59A 0.032(2) 0.041(2) 0.111(7) -0.021(3) 0.019(4) -0.019(2)
 F22 0.191(16) 0.050(5) 0.182(16) 0.022(8) 0.143(11) 0.009(7)
 F24 0.034(6) 0.113(12) 0.279(19) -0.097(10) -0.035(9) -0.008(6)
 F38A 0.043(6) 0.121(14) 0.060(9) -0.040(11) -0.005(5) 0.005(8)
 C81A 0.035(6) 0.048(3) 0.045(6) -0.019(4) -0.021(5) 0.005(3)
 F39A 0.048(4) 0.082(7) 0.044(4) -0.023(4) -0.025(3) -0.007(4)
 F37A 0.065(6) 0.065(4) 0.105(12) 0.009(5) -0.056(7) -0.028(4)
 C28A 0.067(4) 0.065(5) 0.047(4) 0.002(3) -0.015(3) -0.053(3)
 F6A 0.082(11) 0.137(18) 0.040(5) 0.013(7) -0.016(5) -0.077(11)
 F4A 0.039(5) 0.122(7) 0.108(15) -0.015(7) -0.017(6) -0.035(4)
 F5A 0.065(13) 0.121(11) 0.037(7) 0.013(7) -0.011(6) -0.075(10)

_geom_special_details
;
 All esds (except the esd in the dihedral angle between two l.s. planes)
 are estimated using the full covariance matrix.  The cell esds are taken
 into account individually in the estimation of esds in distances, angles
 and torsion angles; correlations between esds in cell parameters are only
 used when they are defined by crystal symmetry.  An approximate (isotropic)
 treatment of cell esds is used for estimating esds involving l.s. planes.
;
loop_
  _geom_bond_atom_site_label_1
  _geom_bond_atom_site_label_2
  _geom_bond_distance
  _geom_bond_site_symmetry_2
  _geom_bond_publ_flag
 F29 C102 1.325(4) . ?
 F43 C72 1.328(4) . ?
 F33 C94 1.323(4) . ?
 F46A C73A 1.318(11) . ?
 F44 C72 1.327(4) . ?
 F45 C72 1.336(4) . ?
 F32 C94 1.345(4) . ?
 F1 C29 1.324(4) . ?
 F14 C51 1.333(4) . ?
 F8 C37 1.325(5) . ?
 F34 C95 1.348(5) . ?
 N1 C15 1.486(3) . ?
 N1 C8 1.484(3) . ?
 N1 C1 1.428(4) . ?
 F11 C36 1.323(4) . ?
 F13 C51 1.310(4) . ?
 F35 C95 1.336(5) . ?
 F36 C95 1.340(6) . ?
 F2 C29 1.333(5) . ?
 F31 C94 1.344(4) . ?
 F38 C81 1.28(2) . ?
 F5 C28 1.332(8) . ?
 F15 C51 1.331(4) . ?
 F28 C102 1.320(4) . ?
 F17 C50 1.338(5) . ?
 F41 C80 1.299(6) . ?
 F30 C102 1.343(5) . ?
 F48A C73A 1.342(8) . ?
 F47A C73A 1.318(7) . ?
 F10 C36 1.325(4) . ?
 C9 C14 1.380(4) . ?
 C9 C8 1.520(4) . ?
 C9 C10 1.389(4) . ?
 C14 C15 1.518(4) . ?
 C14 C13 1.384(4) . ?
 F12 C36 1.311(5) . ?
 F7 C37 1.336(5) . ?
 C88 C84 1.491(4) . ?
 C88 C89 1.399(4) . ?
 C88 C93 1.384(4) . ?
 C82 C15 1.540(4) . ?
 C82 C87 1.390(4) . ?
 C82 C83 1.398(4) . ?
 C16 C8 1.539(4) . ?
 C16 C21 1.390(4) . ?
 C16 C17 1.397(4) . ?
 C65 H65 0.9500 . ?
 C65 C64 1.397(4) . ?
 C65 C60 1.385(4) . ?
 C15 C60 1.537(4) . ?
 C87 H87 0.9500 . ?
 C87 C86 1.395(4) . ?
 C84 C85 1.389(4) . ?
 C84 C83 1.392(4) . ?
 C64 C63 1.391(4) . ?
 C64 C74 1.491(4) . ?
 C62 C66 1.491(4) . ?
 C62 C61 1.395(4) . ?
 C62 C63 1.393(4) . ?
 C85 H85 0.9500 . ?
 C85 C86 1.398(4) . ?
 C83 H83 0.9500 . ?
 C60 C61 1.393(4) . ?
 C39 H39 0.9500 . ?
 C39 C40 1.393(4) . ?
 C39 C38 1.395(4) . ?
 C8 C38 1.547(4) . ?
 C86 C96 1.490(4) . ?
 F19A C58 1.275(7) . ?
 C18 C19 1.394(4) . ?
 C18 C17 1.387(4) . ?
 C18 C22 1.491(4) . ?
 C66 C71 1.396(4) . ?
 C66 C67 1.398(4) . ?
 F3 C29 1.321(4) . ?
 C40 C41 1.399(4) . ?
 C40 C44 1.489(4) . ?
 C96 C97 1.397(4) . ?
 C96 C101 1.390(4) . ?
 C38 C43 1.389(4) . ?
 C61 H61 0.9500 . ?
 C21 H21 0.9500 . ?
 C21 C20 1.397(4) . ?
 C13 H13 0.9500 . ?
 C13 C12 1.387(4) . ?
 C19 H19 0.9500 . ?
 C19 C20 1.391(4) . ?
 C63 H63 0.9500 . ?
 C17 H17 0.9500 . ?
 F22A C59 1.316(12) . ?
 F21A C58 1.329(8) . ?
 C89 H89 0.9500 . ?
 C89 C90 1.386(4) . ?
 C20 C30 1.480(4) . ?
 C70 C71 1.388(4) . ?
 C70 C69 1.379(4) . ?
 C70 C72 1.503(4) . ?
 C10 H10 0.9500 . ?
 C10 C11 1.383(4) . ?
 C41 H41 0.9500 . ?
 C41 C42 1.392(4) . ?
 C71 H71 0.9500 . ?
 F23A C59 1.318(13) . ?
 C44 C49 1.388(4) . ?
 C44 C45 1.386(4) . ?
 F9 C37 1.315(5) . ?
 C30 C35 1.397(4) . ?
 C30 C31 1.386(4) . ?
 C43 H43 0.9500 . ?
 C43 C42 1.397(4) . ?
 C49 H49 0.9500 . ?
 C49 C48 1.388(4) . ?
 C93 H93 0.9500 . ?
 C93 C92 1.388(4) . ?
 C42 C52 1.492(4) . ?
 C22 C23 1.397(4) . ?
 C22 C27 1.385(4) . ?
 C74 C79 1.386(5) . ?
 C74 C75 1.390(5) . ?
 C90 C91 1.371(5) . ?
 C90 C94 1.496(5) . ?
 C12 H12 0.9500 . ?
 C12 C11 1.394(4) . ?
 C98 C97 1.392(4) . ?
 C98 C99 1.381(5) . ?
 C98 C102 1.495(5) . ?
 C97 H97 0.9500 . ?
 C35 H35 0.9500 . ?
 C35 C34 1.387(4) . ?
 C11 H11 0.9500 . ?
 C31 H31 0.9500 . ?
 C31 C32 1.397(4) . ?
 C53 H53 0.9500 . ?
 C53 C52 1.387(4) . ?
 C53 C54 1.392(5) . ?
 C23 H23 0.9500 . ?
 C23 C24 1.386(4) . ?
 C100 C101 1.392(4) . ?
 C100 C99 1.381(5) . ?
 C100 C103 1.476(5) . ?
 C101 H101 0.9500 . ?
 C48 C51 1.498(5) . ?
 C48 C47 1.381(5) . ?
 C67 H67 0.9500 . ?
 C67 C68 1.392(4) . ?
 F6 C28 1.331(7) . ?
 C52 C57 1.391(5) . ?
 F24A C59 1.335(13) . ?
 C68 C69 1.380(4) . ?
 C68 C73A 1.522(8) . ?
 C68 C73 1.50(2) . ?
 C32 C33 1.375(5) . ?
 C32 C36 1.483(5) . ?
 C69 H69 0.9500 . ?
 F18 C50 1.315(6) . ?
 C92 C91 1.387(5) . ?
 C92 C95 1.485(5) . ?
 C92 C95A 1.564(17) . ?
 F39 C81 1.342(17) . ?
 C45 H45 0.9500 . ?
 C45 C46 1.391(5) . ?
 C27 H27 0.9500 . ?
 C27 C26 1.390(5) . ?
 C1 H1 1.0000 . ?
 C1 C2 1.492(5) . ?
 C1 C7 1.506(5) . ?
 C34 C33 1.383(5) . ?
 C34 C37 1.499(5) . ?
 C79 H79 0.9500 . ?
 C79 C78 1.397(5) . ?
 C33 H33 0.9500 . ?
 F16 C50 1.344(7) . ?
 C54 C55 1.378(6) . ?
 C54 C58 1.502(5) . ?
 C78 C77 1.383(5) . ?
 C78 C81 1.54(3) . ?
 C78 C81A 1.45(3) . ?
 C91 H91 0.9500 . ?
 C57 H57 0.9500 . ?
 C57 C56 1.386(5) . ?
 C24 C29 1.489(5) . ?
 C24 C25 1.376(5) . ?
 C75 H75 0.9500 . ?
 C75 C76 1.390(5) . ?
 C99 H99 0.9500 . ?
 C47 H47 0.9500 . ?
 C47 C46 1.376(5) . ?
 C77 H77 0.9500 . ?
 C77 C76 1.381(6) . ?
 C25 H25 0.9500 . ?
 C25 C26 1.380(5) . ?
 F4 C28 1.341(8) . ?
 F20A C58 1.349(6) . ?
 F40 C80 1.316(7) . ?
 C26 C28 1.530(18) . ?
 C26 C28A 1.47(3) . ?
 C46 C50 1.496(5) . ?
 C56 C55 1.389(6) . ?
 C56 C59 1.406(19) . ?
 C56 C59A 1.60(3) . ?
 C55 H55 0.9500 . ?
 C76 C80 1.495(6) . ?
 F37 C81 1.35(2) . ?
 C58 F19 1.360(12) . ?
 C58 F21 1.253(14) . ?
 C58 F20 1.316(9) . ?
 C103 F25 1.284(6) . ?
 C103 F26 1.268(6) . ?
 C103 F27 1.398(6) . ?
 C103 F26A 1.282(5) . ?
 C103 F25A 1.270(5) . ?
 C103 F27A 1.390(5) . ?
 C2 H2 1.0000 . ?
 C2 C7 1.513(5) . ?
 C2 C3 1.527(5) . ?
 C7 H7 1.0000 . ?
 C7 C6 1.517(5) . ?
 C3 H3A 0.9900 . ?
 C3 H3B 0.9900 . ?
 C3 C4 1.514(5) . ?
 C6 H6A 0.9900 . ?
 C6 H6B 0.9900 . ?
 C6 C5 1.543(6) . ?
 F42 C80 1.341(7) . ?
 C5 H5A 0.9900 . ?
 C5 H5B 0.9900 . ?
 C5 C4 1.530(6) . ?
 C4 H4A 0.9900 . ?
 C4 H4B 0.9900 . ?
 F47 C73 1.32(2) . ?
 C73 F48 1.401(18) . ?
 C73 F46 1.31(3) . ?
 C95A F35A 1.340(18) . ?
 C95A F34A 1.344(19) . ?
 C95A F36A 1.33(2) . ?
 F23 C59A 1.322(16) . ?
 C59A F22 1.297(17) . ?
 C59A F24 1.318(17) . ?
 F38A C81A 1.40(3) . ?
 C81A F39A 1.33(2) . ?
 C81A F37A 1.31(3) . ?
 C28A F6A 1.326(9) . ?
 C28A F4A 1.327(10) . ?
 C28A F5A 1.320(10) . ?

loop_
  _geom_angle_atom_site_label_1
  _geom_angle_atom_site_label_2
  _geom_angle_atom_site_label_3
  _geom_angle
  _geom_angle_site_symmetry_1
  _geom_angle_site_symmetry_3
  _geom_angle_publ_flag
 C8 N1 C15 113.4(2) . . ?
 C1 N1 C15 123.2(2) . . ?
 C1 N1 C8 119.3(2) . . ?
 C14 C9 C8 110.8(2) . . ?
 C14 C9 C10 120.7(3) . . ?
 C10 C9 C8 128.6(3) . . ?
 C9 C14 C15 111.6(2) . . ?
 C9 C14 C13 120.9(3) . . ?
 C13 C14 C15 127.3(2) . . ?
 C89 C88 C84 120.4(3) . . ?
 C93 C88 C84 121.5(3) . . ?
 C93 C88 C89 118.2(3) . . ?
 C87 C82 C15 122.8(2) . . ?
 C87 C82 C83 117.9(3) . . ?
 C83 C82 C15 119.3(2) . . ?
 C21 C16 C8 122.2(2) . . ?
 C21 C16 C17 118.8(3) . . ?
 C17 C16 C8 118.7(2) . . ?
 C64 C65 H65 119.5 . . ?
 C60 C65 H65 119.5 . . ?
 C60 C65 C64 120.9(3) . . ?
 N1 C15 C14 100.6(2) . . ?
 N1 C15 C82 112.7(2) . . ?
 N1 C15 C60 111.8(2) . . ?
 C14 C15 C82 109.9(2) . . ?
 C14 C15 C60 107.9(2) . . ?
 C60 C15 C82 113.2(2) . . ?
 C82 C87 H87 119.2 . . ?
 C82 C87 C86 121.5(3) . . ?
 C86 C87 H87 119.2 . . ?
 C85 C84 C88 121.8(2) . . ?
 C85 C84 C83 119.0(3) . . ?
 C83 C84 C88 119.2(3) . . ?
 C65 C64 C74 119.2(3) . . ?
 C63 C64 C65 119.5(3) . . ?
 C63 C64 C74 121.3(2) . . ?
 C61 C62 C66 119.7(2) . . ?
 C63 C62 C66 122.1(2) . . ?
 C63 C62 C61 118.1(3) . . ?
 C84 C85 H85 119.7 . . ?
 C84 C85 C86 120.6(3) . . ?
 C86 C85 H85 119.7 . . ?
 C82 C83 H83 119.1 . . ?
 C84 C83 C82 121.8(3) . . ?
 C84 C83 H83 119.1 . . ?
 C65 C60 C15 121.5(2) . . ?
 C65 C60 C61 118.3(2) . . ?
 C61 C60 C15 119.7(2) . . ?
 C40 C39 H39 119.4 . . ?
 C40 C39 C38 121.3(3) . . ?
 C38 C39 H39 119.4 . . ?
 N1 C8 C9 101.4(2) . . ?
 N1 C8 C16 107.7(2) . . ?
 N1 C8 C38 114.4(2) . . ?
 C9 C8 C16 111.3(2) . . ?
 C9 C8 C38 108.1(2) . . ?
 C16 C8 C38 113.3(2) . . ?
 C87 C86 C85 119.1(3) . . ?
 C87 C86 C96 121.1(2) . . ?
 C85 C86 C96 119.7(2) . . ?
 C19 C18 C22 120.4(3) . . ?
 C17 C18 C19 118.6(3) . . ?
 C17 C18 C22 120.9(3) . . ?
 C71 C66 C62 121.6(3) . . ?
 C71 C66 C67 117.4(3) . . ?
 C67 C66 C62 121.0(3) . . ?
 C39 C40 C41 119.7(3) . . ?
 C39 C40 C44 120.0(3) . . ?
 C41 C40 C44 120.3(3) . . ?
 C97 C96 C86 120.0(3) . . ?
 C101 C96 C86 121.7(3) . . ?
 C101 C96 C97 118.4(3) . . ?
 C39 C38 C8 121.2(2) . . ?
 C43 C38 C39 117.9(3) . . ?
 C43 C38 C8 120.6(2) . . ?
 C62 C61 H61 118.9 . . ?
 C60 C61 C62 122.2(3) . . ?
 C60 C61 H61 118.9 . . ?
 C16 C21 H21 119.7 . . ?
 C16 C21 C20 120.5(3) . . ?
 C20 C21 H21 119.7 . . ?
 C14 C13 H13 120.7 . . ?
 C14 C13 C12 118.6(3) . . ?
 C12 C13 H13 120.7 . . ?
 C18 C19 H19 119.6 . . ?
 C20 C19 C18 120.9(3) . . ?
 C20 C19 H19 119.6 . . ?
 C64 C63 C62 120.9(3) . . ?
 C64 C63 H63 119.6 . . ?
 C62 C63 H63 119.6 . . ?
 C16 C17 H17 119.2 . . ?
 C18 C17 C16 121.6(3) . . ?
 C18 C17 H17 119.2 . . ?
 C88 C89 H89 119.6 . . ?
 C90 C89 C88 120.9(3) . . ?
 C90 C89 H89 119.6 . . ?
 C21 C20 C30 120.8(3) . . ?
 C19 C20 C21 119.5(3) . . ?
 C19 C20 C30 119.7(3) . . ?
 C71 C70 C72 118.8(3) . . ?
 C69 C70 C71 121.0(3) . . ?
 C69 C70 C72 120.2(3) . . ?
 C9 C10 H10 120.6 . . ?
 C11 C10 C9 118.7(3) . . ?
 C11 C10 H10 120.6 . . ?
 C40 C41 H41 120.0 . . ?
 C42 C41 C40 119.9(3) . . ?
 C42 C41 H41 120.0 . . ?
 C66 C71 H71 119.5 . . ?
 C70 C71 C66 121.0(3) . . ?
 C70 C71 H71 119.5 . . ?
 C49 C44 C40 121.0(3) . . ?
 C45 C44 C40 120.3(3) . . ?
 C45 C44 C49 118.7(3) . . ?
 C35 C30 C20 121.2(3) . . ?
 C31 C30 C20 120.2(3) . . ?
 C31 C30 C35 118.6(3) . . ?
 C38 C43 H43 119.0 . . ?
 C38 C43 C42 122.0(3) . . ?
 C42 C43 H43 119.0 . . ?
 C44 C49 H49 119.7 . . ?
 C44 C49 C48 120.6(3) . . ?
 C48 C49 H49 119.7 . . ?
 C88 C93 H93 119.8 . . ?
 C88 C93 C92 120.4(3) . . ?
 C92 C93 H93 119.8 . . ?
 C41 C42 C43 119.1(3) . . ?
 C41 C42 C52 122.6(3) . . ?
 C43 C42 C52 118.3(3) . . ?
 C23 C22 C18 120.8(3) . . ?
 C27 C22 C18 120.8(3) . . ?
 C27 C22 C23 118.4(3) . . ?
 C79 C74 C64 121.2(3) . . ?
 C79 C74 C75 119.1(3) . . ?
 C75 C74 C64 119.6(3) . . ?
 C89 C90 C94 120.2(3) . . ?
 C91 C90 C89 120.6(3) . . ?
 C91 C90 C94 119.1(3) . . ?
 C13 C12 H12 119.8 . . ?
 C13 C12 C11 120.5(3) . . ?
 C11 C12 H12 119.8 . . ?
 C97 C98 C102 120.5(3) . . ?
 C99 C98 C97 121.1(3) . . ?
 C99 C98 C102 118.4(3) . . ?
 C96 C97 H97 119.9 . . ?
 C98 C97 C96 120.3(3) . . ?
 C98 C97 H97 119.9 . . ?
 C30 C35 H35 119.8 . . ?
 C34 C35 C30 120.4(3) . . ?
 C34 C35 H35 119.8 . . ?
 C10 C11 C12 120.6(3) . . ?
 C10 C11 H11 119.7 . . ?
 C12 C11 H11 119.7 . . ?
 C30 C31 H31 119.8 . . ?
 C30 C31 C32 120.5(3) . . ?
 C32 C31 H31 119.8 . . ?
 C52 C53 H53 119.7 . . ?
 C52 C53 C54 120.6(3) . . ?
 C54 C53 H53 119.7 . . ?
 C22 C23 H23 119.8 . . ?
 C24 C23 C22 120.4(3) . . ?
 C24 C23 H23 119.8 . . ?
 C101 C100 C103 119.7(3) . . ?
 C99 C100 C101 121.0(3) . . ?
 C99 C100 C103 119.4(3) . . ?
 C96 C101 C100 120.6(3) . . ?
 C96 C101 H101 119.7 . . ?
 C100 C101 H101 119.7 . . ?
 C49 C48 C51 119.3(3) . . ?
 C47 C48 C49 120.4(3) . . ?
 C47 C48 C51 120.2(3) . . ?
 C66 C67 H67 119.5 . . ?
 C68 C67 C66 121.1(3) . . ?
 C68 C67 H67 119.5 . . ?
 C53 C52 C42 122.0(3) . . ?
 C53 C52 C57 118.3(3) . . ?
 C57 C52 C42 119.7(3) . . ?
 C67 C68 C73A 121.3(3) . . ?
 C67 C68 C73 117.3(8) . . ?
 C69 C68 C67 120.6(3) . . ?
 C69 C68 C73A 117.6(4) . . ?
 C69 C68 C73 120.1(8) . . ?
 C31 C32 C36 118.8(3) . . ?
 C33 C32 C31 120.6(3) . . ?
 C33 C32 C36 120.7(3) . . ?
 C70 C69 C68 118.8(3) . . ?
 C70 C69 H69 120.6 . . ?
 C68 C69 H69 120.6 . . ?
 C93 C92 C95 121.5(3) . . ?
 C93 C92 C95A 110.4(12) . . ?
 C91 C92 C93 120.9(3) . . ?
 C91 C92 C95 117.3(3) . . ?
 C91 C92 C95A 125.5(12) . . ?
 C44 C45 H45 119.9 . . ?
 C44 C45 C46 120.2(3) . . ?
 C46 C45 H45 119.9 . . ?
 C22 C27 H27 119.7 . . ?
 C22 C27 C26 120.7(3) . . ?
 C26 C27 H27 119.7 . . ?
 N1 C1 H1 113.4 . . ?
 N1 C1 C2 124.5(3) . . ?
 N1 C1 C7 121.6(3) . . ?
 C2 C1 H1 113.4 . . ?
 C2 C1 C7 60.6(2) . . ?
 C7 C1 H1 113.4 . . ?
 C35 C34 C37 119.6(3) . . ?
 C33 C34 C35 120.7(3) . . ?
 C33 C34 C37 119.6(3) . . ?
 C74 C79 H79 119.8 . . ?
 C74 C79 C78 120.5(3) . . ?
 C78 C79 H79 119.8 . . ?
 F43 C72 F45 106.1(3) . . ?
 F43 C72 C70 112.0(3) . . ?
 F44 C72 F43 107.4(3) . . ?
 F44 C72 F45 106.8(3) . . ?
 F44 C72 C70 112.8(3) . . ?
 F45 C72 C70 111.3(3) . . ?
 C32 C33 C34 119.3(3) . . ?
 C32 C33 H33 120.3 . . ?
 C34 C33 H33 120.3 . . ?
 F14 C51 C48 112.2(3) . . ?
 F13 C51 F14 105.9(3) . . ?
 F13 C51 F15 108.7(3) . . ?
 F13 C51 C48 112.8(3) . . ?
 F15 C51 F14 103.9(3) . . ?
 F15 C51 C48 112.8(3) . . ?
 C53 C54 C58 118.9(3) . . ?
 C55 C54 C53 120.7(3) . . ?
 C55 C54 C58 120.4(3) . . ?
 C79 C78 C81 118.9(8) . . ?
 C79 C78 C81A 124.3(11) . . ?
 C77 C78 C79 120.0(3) . . ?
 C77 C78 C81 120.9(8) . . ?
 C77 C78 C81A 115.1(10) . . ?
 C90 C91 C92 119.0(3) . . ?
 C90 C91 H91 120.5 . . ?
 C92 C91 H91 120.5 . . ?
 C52 C57 H57 119.5 . . ?
 C56 C57 C52 121.1(3) . . ?
 C56 C57 H57 119.5 . . ?
 C23 C24 C29 120.1(3) . . ?
 C25 C24 C23 120.7(3) . . ?
 C25 C24 C29 119.2(3) . . ?
 C74 C75 H75 119.9 . . ?
 C74 C75 C76 120.2(3) . . ?
 C76 C75 H75 119.9 . . ?
 C98 C99 C100 118.6(3) . . ?
 C98 C99 H99 120.7 . . ?
 C100 C99 H99 120.7 . . ?
 C48 C47 H47 120.4 . . ?
 C46 C47 C48 119.1(3) . . ?
 C46 C47 H47 120.4 . . ?
 F33 C94 F32 107.5(3) . . ?
 F33 C94 F31 105.7(3) . . ?
 F33 C94 C90 113.8(3) . . ?
 F32 C94 C90 111.9(3) . . ?
 F31 C94 F32 106.2(3) . . ?
 F31 C94 C90 111.2(3) . . ?
 F1 C29 F2 104.8(3) . . ?
 F1 C29 C24 111.7(3) . . ?
 F2 C29 C24 113.8(3) . . ?
 F3 C29 F1 105.5(3) . . ?
 F3 C29 F2 107.1(3) . . ?
 F3 C29 C24 113.3(3) . . ?
 C78 C77 H77 120.2 . . ?
 C76 C77 C78 119.7(3) . . ?
 C76 C77 H77 120.2 . . ?
 C24 C25 H25 120.4 . . ?
 C24 C25 C26 119.3(3) . . ?
 C26 C25 H25 120.4 . . ?
 C27 C26 C28 120.3(6) . . ?
 C27 C26 C28A 116.0(10) . . ?
 C25 C26 C27 120.5(3) . . ?
 C25 C26 C28 119.0(6) . . ?
 C25 C26 C28A 123.1(10) . . ?
 C45 C46 C50 118.5(3) . . ?
 C47 C46 C45 120.8(3) . . ?
 C47 C46 C50 120.6(3) . . ?
 F11 C36 F10 106.0(3) . . ?
 F11 C36 C32 112.6(3) . . ?
 F10 C36 C32 113.0(3) . . ?
 F12 C36 F11 107.7(4) . . ?
 F12 C36 F10 104.6(3) . . ?
 F12 C36 C32 112.4(3) . . ?
 F29 C102 F30 104.9(3) . . ?
 F29 C102 C98 113.8(3) . . ?
 F28 C102 F29 106.8(3) . . ?
 F28 C102 F30 106.5(3) . . ?
 F28 C102 C98 112.2(3) . . ?
 F30 C102 C98 112.1(3) . . ?
 C57 C56 C55 120.2(4) . . ?
 C57 C56 C59 123.8(6) . . ?
 C57 C56 C59A 117.2(8) . . ?
 C55 C56 C59 115.9(6) . . ?
 C55 C56 C59A 122.4(7) . . ?
 C54 C55 C56 119.1(3) . . ?
 C54 C55 H55 120.5 . . ?
 C56 C55 H55 120.5 . . ?
 C75 C76 C80 119.8(4) . . ?
 C77 C76 C75 120.5(3) . . ?
 C77 C76 C80 119.7(3) . . ?
 F19A C58 F21A 107.4(7) . . ?
 F19A C58 C54 113.7(5) . . ?
 F19A C58 F20A 106.4(5) . . ?
 F21A C58 C54 113.0(5) . . ?
 F21A C58 F20A 105.4(6) . . ?
 F20A C58 C54 110.4(5) . . ?
 F19 C58 C54 110.6(8) . . ?
 F21 C58 C54 113.2(12) . . ?
 F21 C58 F19 106.8(14) . . ?
 F21 C58 F20 109.9(12) . . ?
 F20 C58 C54 114.8(7) . . ?
 F20 C58 F19 100.6(9) . . ?
 F25 C103 C100 116.1(7) . . ?
 F25 C103 F27 99.0(7) . . ?
 F26 C103 C100 118.1(5) . . ?
 F26 C103 F25 113.1(9) . . ?
 F26 C103 F27 100.5(7) . . ?
 F27 C103 C100 106.4(4) . . ?
 F26A C103 C100 115.9(4) . . ?
 F26A C103 F27A 99.1(5) . . ?
 F25A C103 C100 117.4(5) . . ?
 F25A C103 F26A 111.5(6) . . ?
 F25A C103 F27A 101.8(6) . . ?
 F27A C103 C100 108.3(3) . . ?
 F8 C37 F7 104.6(3) . . ?
 F8 C37 C34 112.8(3) . . ?
 F7 C37 C34 111.3(4) . . ?
 F9 C37 F8 105.8(4) . . ?
 F9 C37 F7 108.4(4) . . ?
 F9 C37 C34 113.3(3) . . ?
 C1 C2 H2 115.9 . . ?
 C1 C2 C7 60.1(2) . . ?
 C1 C2 C3 118.6(3) . . ?
 C7 C2 H2 115.9 . . ?
 C7 C2 C3 119.0(3) . . ?
 C3 C2 H2 115.9 . . ?
 C1 C7 C2 59.2(2) . . ?
 C1 C7 H7 114.5 . . ?
 C1 C7 C6 123.1(3) . . ?
 C2 C7 H7 114.5 . . ?
 C2 C7 C6 120.0(3) . . ?
 C6 C7 H7 114.5 . . ?
 F34 C95 C92 112.3(4) . . ?
 F35 C95 F34 104.7(3) . . ?
 F35 C95 F36 108.6(4) . . ?
 F35 C95 C92 112.6(3) . . ?
 F36 C95 F34 104.5(4) . . ?
 F36 C95 C92 113.5(5) . . ?
 C2 C3 H3A 108.7 . . ?
 C2 C3 H3B 108.7 . . ?
 H3A C3 H3B 107.6 . . ?
 C4 C3 C2 114.4(3) . . ?
 C4 C3 H3A 108.7 . . ?
 C4 C3 H3B 108.7 . . ?
 F38 C81 F39 107.4(18) . . ?
 F38 C81 C78 113.2(19) . . ?
 F38 C81 F37 108.1(15) . . ?
 F39 C81 C78 108.7(12) . . ?
 F39 C81 F37 103.5(16) . . ?
 F37 C81 C78 115.1(14) . . ?
 F46A C73A F48A 106.6(8) . . ?
 F46A C73A F47A 108.0(10) . . ?
 F46A C73A C68 109.7(9) . . ?
 F48A C73A C68 114.7(6) . . ?
 F47A C73A F48A 105.8(6) . . ?
 F47A C73A C68 111.6(5) . . ?
 C7 C6 H6A 108.8 . . ?
 C7 C6 H6B 108.8 . . ?
 C7 C6 C5 113.7(3) . . ?
 H6A C6 H6B 107.7 . . ?
 C5 C6 H6A 108.8 . . ?
 C5 C6 H6B 108.8 . . ?
 C6 C5 H5A 109.6 . . ?
 C6 C5 H5B 109.6 . . ?
 H5A C5 H5B 108.1 . . ?
 C4 C5 C6 110.3(3) . . ?
 C4 C5 H5A 109.6 . . ?
 C4 C5 H5B 109.6 . . ?
 F5 C28 F4 116.0(17) . . ?
 F5 C28 C26 108.1(14) . . ?
 F6 C28 F5 105.0(15) . . ?
 F6 C28 F4 106.5(8) . . ?
 F6 C28 C26 111.4(12) . . ?
 F4 C28 C26 109.8(11) . . ?
 F17 C50 F16 106.4(4) . . ?
 F17 C50 C46 112.7(4) . . ?
 F18 C50 F17 107.3(5) . . ?
 F18 C50 F16 106.9(4) . . ?
 F18 C50 C46 112.9(4) . . ?
 F16 C50 C46 110.3(5) . . ?
 C3 C4 C5 110.0(3) . . ?
 C3 C4 H4A 109.7 . . ?
 C3 C4 H4B 109.7 . . ?
 C5 C4 H4A 109.7 . . ?
 C5 C4 H4B 109.7 . . ?
 H4A C4 H4B 108.2 . . ?
 F22A C59 F23A 105.0(12) . . ?
 F22A C59 F24A 102.9(10) . . ?
 F22A C59 C56 113.3(11) . . ?
 F23A C59 F24A 105.4(12) . . ?
 F23A C59 C56 112.6(12) . . ?
 F24A C59 C56 116.4(12) . . ?
 F41 C80 F40 105.7(5) . . ?
 F41 C80 C76 115.6(3) . . ?
 F41 C80 F42 107.3(5) . . ?
 F40 C80 C76 111.4(5) . . ?
 F40 C80 F42 105.6(4) . . ?
 F42 C80 C76 110.6(5) . . ?
 F47 C73 C68 119.3(15) . . ?
 F47 C73 F48 102.3(14) . . ?
 F48 C73 C68 99.9(13) . . ?
 F46 C73 C68 118(3) . . ?
 F46 C73 F47 109(3) . . ?
 F46 C73 F48 105(2) . . ?
 F35A C95A C92 130.0(19) . . ?
 F35A C95A F34A 103.0(16) . . ?
 F34A C95A C92 110.4(17) . . ?
 F36A C95A C92 104(4) . . ?
 F36A C95A F35A 104(2) . . ?
 F36A C95A F34A 103(2) . . ?
 F23 C59A C56 112.7(15) . . ?
 F22 C59A C56 114.7(16) . . ?
 F22 C59A F23 107.4(16) . . ?
 F22 C59A F24 108.3(16) . . ?
 F24 C59A C56 108.0(15) . . ?
 F24 C59A F23 105.3(15) . . ?
 F38A C81A C78 110(2) . . ?
 F39A C81A C78 117.2(19) . . ?
 F39A C81A F38A 104(2) . . ?
 F37A C81A C78 113.0(18) . . ?
 F37A C81A F38A 105(2) . . ?
 F37A C81A F39A 106(2) . . ?
 F6A C28A C26 112.7(18) . . ?
 F6A C28A F4A 109.3(14) . . ?
 F4A C28A C26 117.1(18) . . ?
 F5A C28A C26 120(3) . . ?
 F5A C28A F6A 103(2) . . ?
 F5A C28A F4A 92(3) . . ?

_shelx_res_file
;
TITL test_a.res in P-1
    test_a_sq_sq_sq.res
    created by SHELXL-2016/6 at 13:16:31 on 04-Dec-2017
REM Old TITL test in P-1
REM SHELXT solution in P-1
REM R1 0.299, Rweak 0.024, Alpha 0.083, Orientation as input
REM Formula found by SHELXT: C118 F40 N7
CELL 0.71073 15.6809 17.3369 19.2948 85.082 78.761 81.2
ZERR 2 0.0006 0.0008 0.0008 0.002 0.001 0.002
LATT 1
SFAC C H F N
UNIT 206 102 96 2
DFIX 1.32 F26A C103 F26 C103 F27A C103 F25 C103 F25A C103 F27 C103
DFIX 2.1 F27A F25A
DFIX 2.1 F26A F25A
DFIX 2.1 F26A F27A
DFIX 2.1 F26 F27
DFIX 2.1 F26 F25
DFIX 2.1 F25 F27
DFIX 1.32 F36 C95 F35 C95 F34 C95 F34A C95A F35A C95A F36A C95A
DFIX 2.1 F36A F34A
DFIX 2.1 F34A F35A
DFIX 2.1 F35A F36A
DFIX 1.32 F19 C58 F20 C58 F20A C58 F21 C58 F21A C58
DFIX 1.32 F23 C59A F23A C59 F24A C59 F24 C59A F22A C59 F22 C59A
DFIX 1.48 C95A C92 C95 C92
DFIX 2.1 F24 F23
DFIX 2.1 F24 F22
DFIX 2.1 F23A F24A
DFIX 2.1 F24A F22A
DFIX 2.1 F23A F22A
DFIX 2.1 F23 F24
DFIX 2.1 F23 F22
DFIX 2.1 F22 F24
DFIX 1.32 0.01 F4 C28 F4A C28A F5A C28A F5 C28 F6A C28A F6 C28
SADI 0.01 F27A C103 F25 C103 F25A C103 F27 C103 F26A C103 F26 C103
RIGU F46 C73 F47 F48
RIGU F46A C73A F47A F48A
RIGU F36 C95 F34 F35
RIGU F36A F34A F35A
RIGU F23 C59A F24 F22
RIGU F23A C59 F24A F22A
RIGU F39A C81A F38A F37A
RIGU F38 C81 F39 F37
RIGU F6A C28A F4A F5A
RIGU F4 C28 F5 F6
RIGU F20A C58 F21A F19A
RIGU 0.002 0.004 F20 F21 C58 F19
RIGU 0.002 0.004 F27A F25A F26A C103
RIGU 0.002 0.004 F26 F25 F27 C103
EADP C73 C73A
EADP C95A C95
EADP F34A F34
EADP F35A F35
EADP F36A F36
EADP C59 C59A
EADP C81 C81A
EADP C28A C28

L.S. 10 0 153
PLAN  60
SIZE 0.2 0.1 0.2
TEMP -173.15
BOND $H
ABIN
fmap 2
acta
OMIT 1 0 0
OMIT 0 0 1
REM <olex2.extras>
REM <HklSrc "%.\\test_a_sq_sq_sq.hkl">
REM </olex2.extras>

WGHT    0.047400   11.707000
FVAR       0.20969   0.70738   0.41788   0.88824   0.64311   0.58497   0.55161
FVAR       0.62197
F29   3    1.259862    0.298402    0.880419    11.00000    0.02565    0.06932 =
         0.04080   -0.02242   -0.01365   -0.00039
F43   3    0.828548   -0.287427    0.648580    11.00000    0.04878    0.02066 =
         0.08993   -0.01176   -0.02544    0.00608
F33   3    0.564154    0.532209    0.947088    11.00000    0.03190    0.06617 =
         0.04625   -0.02633   -0.01570    0.01772
PART 1
F46A  3    0.648412   -0.036116    0.476339    21.00000    0.05846    0.03620 =
         0.02196   -0.01163   -0.01763    0.01139
PART 0
F44   3    0.713065   -0.284736    0.604431    11.00000    0.08110    0.02213 =
         0.05440   -0.00733   -0.03859   -0.01345
F45   3    0.702936   -0.277802    0.715932    11.00000    0.08110    0.02427 =
         0.04690    0.00705   -0.00989   -0.01530
F32   3    0.564115    0.570661    1.050228    11.00000    0.02991    0.05977 =
         0.04612   -0.02938    0.00148    0.00437
F1    3    0.505155   -0.117338    0.888333    11.00000    0.05348    0.07700 =
         0.02748    0.01115    0.00122   -0.00733
F14   3    0.344148    0.677314    0.954660    11.00000    0.08510    0.03927 =
         0.03935   -0.01392   -0.01244    0.00443
F8    3    0.386300    0.530137    0.525788    11.00000    0.07167    0.03306 =
         0.06251   -0.00528   -0.01921    0.00685
PART 1
F34   3    0.913394    0.585622    1.059040    41.00000    0.03476    0.04584 =
         0.06376   -0.02806   -0.01419   -0.01201
PART 0
N1    4    0.724339    0.241542    0.734883    11.00000    0.01293    0.01475 =
         0.01715   -0.00178   -0.00398   -0.00026
F11   3    0.496566    0.182273    0.356780    11.00000    0.10814    0.04167 =
         0.03723   -0.01111    0.00112   -0.03095
F13   3    0.337480    0.767667    0.874646    11.00000    0.12501    0.02368 =
         0.05015   -0.00459    0.01574   -0.02216
PART 1
F35   3    0.958943    0.466160    1.082446    41.00000    0.05824    0.04802 =
         0.06020   -0.02541   -0.04098    0.01205
F36   3    0.840831    0.525136    1.145810    41.00000    0.05586    0.08630 =
         0.03421   -0.02410   -0.00902   -0.01820
PART 0
F2    3    0.620386   -0.114521    0.811513    11.00000    0.04618    0.06804 =
         0.06635    0.04104    0.01446    0.01167
F31   3    0.619247    0.634810    0.955975    11.00000    0.05353    0.03368 =
         0.09762    0.00327    0.00527    0.01791
PART 1
F38   3    1.244947   -0.061637    0.904938    71.00000    0.02326    0.05447 =
         0.05987   -0.00715   -0.01416    0.00208
F5    3    0.240950   -0.089045    0.753865    81.00000    0.07589    0.09531 =
         0.05992    0.00308   -0.01368   -0.07065
PART 0
F15   3    0.223983    0.713415    0.921258    11.00000    0.04127    0.07931 =
         0.08646   -0.04632    0.00749    0.00597
F28   3    1.354541    0.234881    0.804158    11.00000    0.04099    0.13799 =
         0.08973   -0.07734   -0.04003    0.05073
F17   3    0.156202    0.591155    0.727171    11.00000    0.03033    0.11323 =
         0.09199   -0.04511   -0.03524    0.02315
F41   3    0.899690   -0.229247    0.994766    11.00000    0.06499    0.07289 =
         0.10190    0.05597   -0.02736   -0.01348
F30   3    1.328889    0.359303    0.792837    11.00000    0.06489    0.12764 =
         0.07645    0.00414   -0.02765   -0.06889
PART 1
F48A  3    0.544493   -0.000423    0.561287    21.00000    0.03138    0.08916 =
         0.04390   -0.00289   -0.01859    0.00780
F47A  3    0.644283    0.071070    0.524222    21.00000    0.08073    0.02452 =
         0.05591    0.00267   -0.04676    0.00185
PART 0
F10   3    0.497313    0.289406    0.295433    11.00000    0.17045    0.05393 =
         0.02975    0.00232   -0.03552   -0.02175
C9    1    0.614298    0.250943    0.834999    11.00000    0.01762    0.01298 =
         0.01849   -0.00614   -0.00468   -0.00376
C14   1    0.687827    0.206460    0.854136    11.00000    0.01586    0.01167 =
         0.01906   -0.00596   -0.00404   -0.00295
F12   3    0.611017    0.238551    0.331816    11.00000    0.06506    0.15502 =
         0.06810   -0.06201    0.01320   -0.02720
F7    3    0.395765    0.527243    0.415672    11.00000    0.18094    0.03049 =
         0.05136    0.01662   -0.03139    0.00140
C88   1    0.819838    0.420509    0.933186    11.00000    0.02037    0.01432 =
         0.02066   -0.00170   -0.00228   -0.00453
C82   1    0.831933    0.256274    0.812606    11.00000    0.01542    0.01338 =
         0.01865    0.00170   -0.00659   -0.00047
C16   1    0.574326    0.250070    0.714427    11.00000    0.01233    0.01619 =
         0.02151   -0.00476   -0.00235   -0.00021
C65   1    0.869855    0.082775    0.820935    11.00000    0.01746    0.01706 =
         0.02075   -0.00313   -0.00671   -0.00471
AFIX  43
H65   2    0.894187    0.111875    0.849888    11.00000   -1.20000
AFIX   0
C15   1    0.767067    0.206102    0.794636    11.00000    0.01466    0.01313 =
         0.01805   -0.00157   -0.00568   -0.00086
C87   1    0.918859    0.251619    0.777878    11.00000    0.01651    0.01576 =
         0.01738   -0.00221   -0.00439    0.00066
AFIX  43
H87   2    0.940107    0.215236    0.742240    11.00000   -1.20000
AFIX   0
C84   1    0.856382    0.361410    0.879500    11.00000    0.01907    0.01395 =
         0.01853   -0.00010   -0.00687   -0.00116
C64   1    0.897619    0.002530    0.817005    11.00000    0.01936    0.01657 =
         0.02312    0.00099   -0.00687    0.00053
C62   1    0.802199   -0.002973    0.733334    11.00000    0.01925    0.01449 =
         0.01863   -0.00042   -0.00228   -0.00292
C85   1    0.943243    0.354812    0.844549    11.00000    0.01859    0.01411 =
         0.02013   -0.00126   -0.00672   -0.00424
AFIX  43
H85   2    0.980967    0.388435    0.854998    11.00000   -1.20000
AFIX   0
C83   1    0.802264    0.311064    0.864160    11.00000    0.01368    0.01481 =
         0.01841   -0.00125   -0.00431   -0.00100
AFIX  43
H83   2    0.743561    0.314023    0.889420    11.00000   -1.20000
AFIX   0
C60   1    0.807338    0.120550    0.783215    11.00000    0.01420    0.01432 =
         0.01626    0.00079   -0.00101   -0.00281
C39   1    0.541670    0.416544    0.763868    11.00000    0.01769    0.01722 =
         0.02337   -0.00270   -0.00763   -0.00339
AFIX  43
H39   2    0.490963    0.392383    0.764882    11.00000   -1.20000
AFIX   0
C8    1    0.633345    0.280632    0.757884    11.00000    0.01418    0.01362 =
         0.02151   -0.00255   -0.00510   -0.00126
C86   1    0.975603    0.299126    0.794142    11.00000    0.01608    0.01684 =
         0.01996    0.00143   -0.00527   -0.00261
PART 1
F19A  3    0.832958    0.738341    0.824380    51.00000    0.10920    0.02399 =
         0.05691    0.00091   -0.04370   -0.00621
PART 0
C18   1    0.502606    0.142094    0.692697    11.00000    0.01426    0.01569 =
         0.02516   -0.00401   -0.00137   -0.00405
C66   1    0.766719   -0.046028    0.684095    11.00000    0.02048    0.01838 =
         0.01967   -0.00375   -0.00328   -0.00281
F3    3    0.531038   -0.193981    0.805431    11.00000    0.18893    0.02148 =
         0.09121    0.00203   -0.06831   -0.00536
C40   1    0.532389    0.496879    0.770850    11.00000    0.01906    0.01858 =
         0.02017   -0.00124   -0.00804    0.00041
C96   1    1.070248    0.289786    0.760356    11.00000    0.01740    0.01265 =
         0.02698   -0.00283   -0.00419   -0.00266
C38   1    0.624006    0.370897    0.755414    11.00000    0.01968    0.01484 =
         0.01792   -0.00090   -0.00774   -0.00306
C61   1    0.772762    0.076437    0.741178    11.00000    0.01655    0.01544 =
         0.01716   -0.00092   -0.00553   -0.00104
AFIX  43
H61   2    0.727662    0.101260    0.717070    11.00000   -1.20000
AFIX   0
C21   1    0.553008    0.289694    0.653010    11.00000    0.01757    0.01303 =
         0.02568   -0.00075   -0.00427   -0.00112
AFIX  43
H21   2    0.568291    0.340635    0.640246    11.00000   -1.20000
AFIX   0
C13   1    0.685285    0.171822    0.921722    11.00000    0.01765    0.02193 =
         0.02124   -0.00264   -0.00663   -0.00339
AFIX  43
H13   2    0.735508    0.139934    0.934259    11.00000   -1.20000
AFIX   0
C19   1    0.484945    0.181527    0.629876    11.00000    0.01591    0.02228 =
         0.02215   -0.00655   -0.00576   -0.00452
AFIX  43
H19   2    0.455882    0.157735    0.600309    11.00000   -1.20000
AFIX   0
C63   1    0.864509   -0.039466    0.772435    11.00000    0.02262    0.01346 =
         0.02471   -0.00094   -0.00650    0.00094
AFIX  43
H63   2    0.884664   -0.093740    0.768621    11.00000   -1.20000
AFIX   0
C17   1    0.547799    0.176708    0.733875    11.00000    0.01495    0.01639 =
         0.01992   -0.00227   -0.00312   -0.00012
AFIX  43
H17   2    0.561026    0.149850    0.776342    11.00000   -1.20000
AFIX   0
PART 1
F22A  3    1.041004    0.557302    0.616498    61.00000    0.03838    0.05841 =
         0.06704   -0.00340    0.01624   -0.02034
F21A  3    0.818743    0.654653    0.909596    51.00000    0.13397    0.07848 =
         0.04220   -0.00317   -0.01495   -0.07830
PART 0
C89   1    0.734641    0.460312    0.936277    11.00000    0.02174    0.01951 =
         0.02381   -0.00358   -0.00462   -0.00600
AFIX  43
H89   2    0.700066    0.449388    0.903945    11.00000   -1.20000
AFIX   0
C20   1    0.509306    0.255228    0.609917    11.00000    0.01487    0.01669 =
         0.02354   -0.00299   -0.00501   -0.00005
C70   1    0.738030   -0.166645    0.644167    11.00000    0.02692    0.01854 =
         0.02617   -0.00347   -0.00537   -0.00248
C10   1    0.536396    0.263355    0.883701    11.00000    0.01799    0.01826 =
         0.02705   -0.00599   -0.00510   -0.00176
AFIX  43
H10   2    0.485715    0.293747    0.870454    11.00000   -1.20000
AFIX   0
C41   1    0.606903    0.533228    0.767621    11.00000    0.02655    0.01261 =
         0.02381   -0.00137   -0.00955   -0.00163
AFIX  43
H41   2    0.600882    0.587917    0.772713    11.00000   -1.20000
AFIX   0
C71   1    0.772655   -0.127408    0.689580    11.00000    0.02233    0.01566 =
         0.02308   -0.00149   -0.00712    0.00023
AFIX  43
H71   2    0.800808   -0.156356    0.724916    11.00000   -1.20000
AFIX   0
PART 1
F23A  3    0.990587    0.454934    0.606109    61.00000    0.07585    0.17376 =
         0.18671   -0.13530    0.07648   -0.08076
PART 0
C44   1    0.443461    0.543756    0.781017    11.00000    0.02059    0.01482 =
         0.02697    0.00155   -0.00655   -0.00129
F9    3    0.288049    0.484823    0.487858    11.00000    0.05478    0.04107 =
         0.24378    0.01353   -0.07382    0.00112
C30   1    0.490602    0.295266    0.542507    11.00000    0.02041    0.02156 =
         0.02566    0.00009   -0.00833   -0.00939
C43   1    0.697057    0.408402    0.751983    11.00000    0.01694    0.01630 =
         0.02155    0.00000   -0.00557   -0.00033
AFIX  43
H43   2    0.753621    0.378209    0.746086    11.00000   -1.20000
AFIX   0
C49   1    0.418272    0.598477    0.832251    11.00000    0.02194    0.01711 =
         0.02655   -0.00140   -0.00778   -0.00278
AFIX  43
H49   2    0.458487    0.606741    0.860961    11.00000   -1.20000
AFIX   0
C93   1    0.868439    0.437544    0.981182    11.00000    0.02086    0.02464 =
         0.02740   -0.00777   -0.00447   -0.00601
AFIX  43
H93   2    0.926561    0.411524    0.979989    11.00000   -1.20000
AFIX   0
C42   1    0.689908    0.489162    0.756937    11.00000    0.02106    0.01710 =
         0.02560    0.00008   -0.00859   -0.00572
C22   1    0.469693    0.066165    0.716518    11.00000    0.02640    0.02015 =
         0.01890   -0.00657   -0.00011   -0.00775
C74   1    0.960695   -0.036793    0.861976    11.00000    0.02722    0.01809 =
         0.02986   -0.00637   -0.01327    0.00555
C90   1    0.700056    0.515464    0.985898    11.00000    0.02408    0.02208 =
         0.02993   -0.00798   -0.00012   -0.00335
C12   1    0.607874    0.184635    0.970774    11.00000    0.02855    0.02554 =
         0.01950   -0.00196   -0.00164   -0.00766
AFIX  43
H12   2    0.605178    0.161905    1.017598    11.00000   -1.20000
AFIX   0
C98   1    1.222312    0.288204    0.768952    11.00000    0.01792    0.02400 =
         0.03608   -0.01045   -0.00592   -0.00182
C97   1    1.133945    0.295564    0.800428    11.00000    0.01767    0.02034 =
         0.02659   -0.00944   -0.00548   -0.00262
AFIX  43
H97   2    1.116869    0.304559    0.849393    11.00000   -1.20000
AFIX   0
C35   1    0.445079    0.371014    0.540541    11.00000    0.02709    0.02165 =
         0.02892   -0.00032   -0.00969   -0.00822
AFIX  43
H35   2    0.426985    0.398127    0.582848    11.00000   -1.20000
AFIX   0
C11   1    0.534025    0.230623    0.951844    11.00000    0.01990    0.02694 =
         0.02429   -0.00845    0.00406   -0.00604
AFIX  43
H11   2    0.481607    0.239556    0.986059    11.00000   -1.20000
AFIX   0
C31   1    0.516044    0.256986    0.480056    11.00000    0.02697    0.02554 =
         0.02793   -0.00151   -0.00887   -0.00835
AFIX  43
H31   2    0.546749    0.205320    0.480448    11.00000   -1.20000
AFIX   0
C53   1    0.778423    0.580602    0.797097    11.00000    0.02825    0.01787 =
         0.03763    0.00785   -0.01614   -0.00736
AFIX  43
H53   2    0.728189    0.600187    0.830177    11.00000   -1.20000
AFIX   0
C23   1    0.517682    0.008217    0.753938    11.00000    0.02972    0.01802 =
         0.02134   -0.00500    0.00057   -0.00628
AFIX  43
H23   2    0.572688    0.016633    0.763361    11.00000   -1.20000
AFIX   0
C100  1    1.186297    0.267874    0.658535    11.00000    0.02134    0.02971 =
         0.03091   -0.00848   -0.00086   -0.00581
C101  1    1.097622    0.275295    0.689150    11.00000    0.01702    0.02649 =
         0.02714   -0.00716   -0.00418   -0.00463
AFIX  43
H101  2    1.055416    0.270409    0.661110    11.00000   -1.20000
AFIX   0
C48   1    0.334849    0.641233    0.841914    11.00000    0.02630    0.01918 =
         0.03275    0.00059   -0.00305    0.00220
C67   1    0.725048   -0.006011    0.631102    11.00000    0.04441    0.01422 =
         0.02105   -0.00306   -0.01175    0.00180
AFIX  43
H67   2    0.721213    0.049306    0.625268    11.00000   -1.20000
AFIX   0
PART 1
F6    3    0.292732   -0.071606    0.644992    81.00000    0.09605    0.09670 =
         0.04496   -0.00253   -0.02276   -0.06859
PART 0
C52   1    0.772077    0.524455    0.751954    11.00000    0.02349    0.01438 =
         0.03687    0.00674   -0.01222   -0.00460
PART 1
F24A  3    1.067479    0.460226    0.683555    61.00000    0.03477    0.03128 =
         0.19168    0.02916    0.02924    0.01312
PART 0
C68   1    0.689077   -0.045882    0.586738    11.00000    0.04731    0.02360 =
         0.02733   -0.00580   -0.01742    0.00289
C32   1    0.496868    0.293822    0.416526    11.00000    0.03552    0.03688 =
         0.02753    0.00196   -0.01173   -0.01957
C69   1    0.695851   -0.126413    0.592833    11.00000    0.03497    0.02549 =
         0.02834   -0.00900   -0.01242   -0.00267
AFIX  43
H69   2    0.671868   -0.153633    0.562191    11.00000   -1.20000
AFIX   0
F18   3    0.245261    0.492976    0.685359    11.00000    0.05890    0.14749 =
         0.17111   -0.12208   -0.07608    0.04222
C92   1    0.832805    0.492383    1.031027    11.00000    0.02854    0.03409 =
         0.02916   -0.01383   -0.00369   -0.00978
PART 1
F39   3    1.172070    0.026338    0.970502    71.00000    0.04876    0.11432 =
         0.07339   -0.06094   -0.01987   -0.00309
PART 0
C45   1    0.384060    0.533209    0.739254    11.00000    0.02480    0.02774 =
         0.03254   -0.00767   -0.00995    0.00286
AFIX  43
H45   2    0.400107    0.495889    0.704040    11.00000   -1.20000
AFIX   0
C27   1    0.389935    0.051972    0.703366    11.00000    0.02942    0.03216 =
         0.02783   -0.00264   -0.00624   -0.01464
AFIX  43
H27   2    0.356372    0.090608    0.677953    11.00000   -1.20000
AFIX   0
C1    1    0.772451    0.263474    0.667138    11.00000    0.02434    0.02827 =
         0.02780   -0.00305   -0.00596   -0.00500
AFIX  13
H1    2    0.781542    0.319678    0.661913    11.00000   -1.20000
AFIX   0
C34   1    0.426138    0.406879    0.477214    11.00000    0.03201    0.02712 =
         0.03429    0.00775   -0.01709   -0.01004
C79   1    1.034802   -0.004790    0.867113    11.00000    0.02942    0.02181 =
         0.03990   -0.00912   -0.01702    0.00607
AFIX  43
H79   2    1.047129    0.042069    0.840268    11.00000   -1.20000
AFIX   0
C72   1    0.745732   -0.254279    0.652665    11.00000    0.04273    0.01997 =
         0.03746   -0.00454   -0.01731   -0.00636
C33   1    0.451711    0.368262    0.415089    11.00000    0.04132    0.03387 =
         0.03389    0.01112   -0.01997   -0.01959
AFIX  43
H33   2    0.438206    0.392931    0.371889    11.00000   -1.20000
AFIX   0
C51   1    0.310095    0.700630    0.896956    11.00000    0.02874    0.02158 =
         0.04290   -0.00474   -0.00164    0.00047
F16   3    0.259866    0.607546    0.638719    11.00000    0.07111    0.24190 =
         0.05911   -0.01957   -0.04544    0.03048
C54   1    0.857774    0.608499    0.794344    11.00000    0.03613    0.02017 =
         0.05292    0.00907   -0.02352   -0.01107
C78   1    1.091532   -0.040954    0.911500    11.00000    0.03171    0.03607 =
         0.04625   -0.01551   -0.02094    0.00741
C91   1    0.748273    0.531493    1.033672    11.00000    0.03302    0.02739 =
         0.03356   -0.01623    0.00153   -0.00694
AFIX  43
H91   2    0.724176    0.568805    1.068058    11.00000   -1.20000
AFIX   0
C57   1    0.846200    0.498542    0.702799    11.00000    0.02786    0.01558 =
         0.05737   -0.00062   -0.00758   -0.00668
AFIX  43
H57   2    0.842782    0.460795    0.670904    11.00000   -1.20000
AFIX   0
C24   1    0.485556   -0.061457    0.777396    11.00000    0.04684    0.02169 =
         0.02065   -0.00538    0.00312   -0.00877
C75   1    0.943491   -0.105357    0.901581    11.00000    0.03778    0.02365 =
         0.04295    0.00581   -0.02141    0.00127
AFIX  43
H75   2    0.893385   -0.128293    0.897919    11.00000   -1.20000
AFIX   0
C99   1    1.249118    0.274493    0.698048    11.00000    0.01741    0.03043 =
         0.03609   -0.01209    0.00148   -0.00441
AFIX  43
H99   2    1.309544    0.269708    0.676870    11.00000   -1.20000
AFIX   0
C47   1    0.276086    0.630828    0.799899    11.00000    0.02061    0.03709 =
         0.04370   -0.00474   -0.00956    0.01117
AFIX  43
H47   2    0.219172    0.660401    0.806249    11.00000   -1.20000
AFIX   0
C94   1    0.611824    0.562173    0.984720    11.00000    0.03422    0.03250 =
         0.04076   -0.01358    0.00404    0.00494
C29   1    0.535494   -0.121625    0.819557    11.00000    0.06019    0.02604 =
         0.02824    0.00416    0.00656   -0.01065
C77   1    1.073358   -0.108676    0.951307    11.00000    0.04411    0.04011 =
         0.04182   -0.00404   -0.02687    0.01652
AFIX  43
H77   2    1.111603   -0.133181    0.981778    11.00000   -1.20000
AFIX   0
C25   1    0.405818   -0.074642    0.764633    11.00000    0.06015    0.02792 =
         0.02849   -0.00318    0.00203   -0.02528
AFIX  43
H25   2    0.383609   -0.122104    0.781587    11.00000   -1.20000
AFIX   0
PART 1
F4    3    0.221522    0.029935    0.696107    81.00000    0.04888    0.08297 =
         0.11251    0.01039   -0.03765   -0.04009
F20A  3    0.945791    0.669858    0.851378    51.00000    0.05949    0.06250 =
         0.14298   -0.02074   -0.06517   -0.01608
PART 0
F40   3    1.031615   -0.275056    0.966309    11.00000    0.06523    0.05422 =
         0.26877    0.07427   -0.00995    0.01104
C26   1    0.358466   -0.018208    0.726955    11.00000    0.04491    0.04158 =
         0.03334   -0.00589   -0.00310   -0.02713
C46   1    0.301039    0.577054    0.748699    11.00000    0.02548    0.04531 =
         0.04385   -0.01191   -0.01606    0.00697
C36   1    0.525357    0.250839    0.350894    11.00000    0.05403    0.04501 =
         0.02772   -0.00109   -0.00737   -0.01913
C102  1    1.290732    0.294475    0.811613    11.00000    0.01764    0.05536 =
         0.04275   -0.01847   -0.00448   -0.00261
C56   1    0.924933    0.526897    0.699605    11.00000    0.02452    0.02190 =
         0.08254    0.00298   -0.00648   -0.00681
C55   1    0.931237    0.581680    0.746206    11.00000    0.03054    0.02334 =
         0.07874    0.01155   -0.02223   -0.01288
AFIX  43
H55   2    0.985427    0.600389    0.744904    11.00000   -1.20000
AFIX   0
C76   1    0.999339   -0.140496    0.946537    11.00000    0.04502    0.03624 =
         0.05069    0.00859   -0.02401    0.00399
PART 1
F37   3    1.195651    0.048308    0.859617    71.00000    0.04387    0.05589 =
         0.09140    0.00046   -0.03943   -0.01670
PART 0
C58   1    0.861964    0.668925    0.844474    11.00000    0.05436    0.03660 =
         0.05878    0.00648   -0.03049   -0.02617
C103  1    1.213641    0.254597    0.582373    11.00000    0.02579    0.07346 =
         0.03399   -0.01560    0.00242   -0.01036
C37   1    0.373199    0.486530    0.476753    11.00000    0.05086    0.03063 =
         0.06213    0.01601   -0.03020   -0.01101
C2    1    0.844997    0.211312    0.624904    11.00000    0.03884    0.03725 =
         0.03845    0.00004   -0.00984   -0.00316
AFIX  13
H2    2    0.856922    0.156620    0.645346    11.00000   -1.20000
AFIX   0
C7    1    0.758116    0.232932    0.600182    11.00000    0.03493    0.04716 =
         0.03743   -0.00979   -0.00669   -0.00428
AFIX  13
H7    2    0.720450    0.190222    0.607860    11.00000   -1.20000
AFIX   0
PART 1
C95   1    0.885564    0.516004    1.079689    41.00000    0.03071    0.04124 =
         0.04056   -0.02161   -0.00893   -0.00111
PART 0
C3    1    0.925007    0.246581    0.584290    11.00000    0.03320    0.05415 =
         0.03910   -0.00087   -0.00650   -0.00290
AFIX  23
H3A   2    0.934265    0.290237    0.610611    11.00000   -1.20000
H3B   2    0.977383    0.206372    0.582696    11.00000   -1.20000
AFIX   0
PART 1
C81   1    1.177914   -0.008582    0.910009    71.00000    0.03547    0.04832 =
         0.04478   -0.01896   -0.02058    0.00549
C73A  1    0.631002   -0.002449    0.537157    21.00000    0.03071    0.02483 =
         0.02701   -0.01246   -0.00803    0.00868
PART 0
C6    1    0.753034    0.283860    0.532751    11.00000    0.03884    0.04824 =
         0.03743    0.00182   -0.01184   -0.00224
AFIX  23
H6A   2    0.697883    0.321001    0.540098    11.00000   -1.20000
H6B   2    0.750601    0.250284    0.494381    11.00000   -1.20000
AFIX   0
F42   3    0.991121   -0.208511    1.056867    11.00000    0.23966    0.16566 =
         0.11734    0.09938   -0.12191   -0.09974
C5    1    0.831009    0.330510    0.508959    11.00000    0.04657    0.06158 =
         0.04173    0.01061   -0.01044   -0.00726
AFIX  23
H5A   2    0.829617    0.354543    0.460690    11.00000   -1.20000
H5B   2    0.826038    0.372997    0.541292    11.00000   -1.20000
AFIX   0
PART 1
C28   1    0.274887   -0.036661    0.705985    81.00000    0.06720    0.06481 =
         0.04654    0.00242   -0.01506   -0.05328
PART 0
C50   1    0.240309    0.566222    0.700483    11.00000    0.03627    0.11839 =
         0.06397   -0.04246   -0.03123    0.02946
C4    1    0.917899    0.276719    0.509337    11.00000    0.05321    0.06194 =
         0.03942    0.00465   -0.00585   -0.01394
AFIX  23
H4A   2    0.921073    0.232150    0.479673    11.00000   -1.20000
H4B   2    0.967501    0.305834    0.489111    11.00000   -1.20000
AFIX   0
PART 1
C59   1    1.003096    0.500387    0.653536    61.00000    0.03153    0.04134 =
         0.11060   -0.02085    0.01886   -0.01858
PART 0
C80   1    0.978697   -0.212883    0.990576    11.00000    0.06188    0.07105 =
         0.09205    0.04902   -0.04261   -0.00019
PART 2
F47   3    0.697305    0.064388    0.499622   -21.00000    0.09127    0.03412 =
         0.04396    0.01572   -0.03644   -0.01888
C73   1    0.665696   -0.001991    0.521232   -21.00000    0.03071    0.02483 =
         0.02701   -0.01246   -0.00803    0.00868
F48   3    0.576589    0.023858    0.545709   -21.00000    0.04108    0.08337 =
         0.04561   -0.00152   -0.01559    0.02492
F46   3    0.668057   -0.042250    0.465994   -21.00000    0.12537    0.03655 =
         0.02655   -0.01308   -0.02862    0.00720
PART 0
PART 1
F25   3    1.154037    0.273432    0.544460    31.00000    0.04463    0.16655 =
         0.03229   -0.03534   -0.00796    0.01887
F26   3    1.288229    0.271123    0.551475    31.00000    0.05451    0.21318 =
         0.03629   -0.03765    0.01845   -0.08149
F27   3    1.226525    0.173613    0.576725    31.00000    0.20491    0.07918 =
         0.04157   -0.03536    0.02475   -0.00720
PART 0
PART 2
F26A  3    1.291710    0.219237    0.563296   -31.00000    0.03068    0.12895 =
         0.04474   -0.04671    0.00144    0.00999
F25A  3    1.159274    0.229657    0.551883   -31.00000    0.03643    0.17679 =
         0.03843   -0.04369    0.00633   -0.04631
F27A  3    1.223293    0.326356    0.545865   -31.00000    0.16745    0.08964 =
         0.03301   -0.00204    0.02980   -0.01810
C95A  1    0.884687    0.481144    1.093492   -41.00000    0.03071    0.04124 =
         0.04056   -0.02161   -0.00893   -0.00111
F35A  3    0.915029    0.415507    1.128155   -41.00000    0.05824    0.04802 =
         0.06020   -0.02541   -0.04098    0.01205
F34A  3    0.954513    0.520053    1.077916   -41.00000    0.03476    0.04584 =
         0.06376   -0.02806   -0.01419   -0.01201
F36A  3    0.831499    0.521583    1.144192   -41.00000    0.05586    0.08630 =
         0.03421   -0.02410   -0.00902   -0.01820
F19   3    0.794463    0.728234    0.843663   -51.00000    0.11625    0.05165 =
         0.12810   -0.04892   -0.07235    0.01075
F21   3    0.857091    0.642353    0.907398   -51.00000    0.14653    0.06903 =
         0.06704    0.01932   -0.04996   -0.03247
F20   3    0.929537    0.707713    0.826160   -51.00000    0.09983    0.08772 =
         0.12888   -0.03418   -0.00628   -0.07769
F23   3    0.992407    0.435410    0.608590   -61.00000    0.03308    0.02953 =
         0.09804   -0.01169    0.01446   -0.00861
C59A  1    1.004172    0.498918    0.636888   -61.00000    0.03153    0.04134 =
         0.11060   -0.02085    0.01886   -0.01858
F22   3    1.020137    0.551220    0.585604   -61.00000    0.19065    0.05009 =
         0.18240    0.02191    0.14292    0.00936
F24   3    1.075643    0.478659    0.664270   -61.00000    0.03383    0.11274 =
         0.27907   -0.09739   -0.03470   -0.00815
F38A  3    1.243464   -0.045342    0.893061   -71.00000    0.04314    0.12124 =
         0.06029   -0.04021   -0.00457    0.00455
C81A  1    1.163446   -0.006777    0.927635   -71.00000    0.03547    0.04832 =
         0.04478   -0.01896   -0.02058    0.00549
F39A  3    1.171809   -0.010266    0.995148   -71.00000    0.04829    0.08167 =
         0.04376   -0.02256   -0.02498   -0.00683
F37A  3    1.162846    0.066444    0.905046   -71.00000    0.06500    0.06465 =
         0.10532    0.00910   -0.05567   -0.02828
C28A  1    0.268620   -0.023517    0.717171   -81.00000    0.06720    0.06481 =
         0.04654    0.00242   -0.01506   -0.05328
F6A   3    0.264474   -0.033323    0.650550   -81.00000    0.08169    0.13659 =
         0.04015    0.01314   -0.01598   -0.07675
F4A   3    0.205872    0.033016    0.742152   -81.00000    0.03911    0.12203 =
         0.10831   -0.01451   -0.01718   -0.03518
F5A   3    0.224579   -0.077724    0.753117   -81.00000    0.06514    0.12092 =
         0.03698    0.01338   -0.01135   -0.07494
HKLF 4


REM  test_a.res in P-1
REM R1 =  0.0615 for   14088 Fo > 4sig(Fo)  and  0.0840 for all   18677 data
REM   1562 parameters refined using    297 restraints

END

WGHT      0.0475     11.6925

REM Highest difference peak  0.676,  deepest hole -0.671,  1-sigma level  0.063
Q1    1   0.2408  0.7580  0.8794  11.00000  0.05    0.68
Q2    1   1.0650 -0.2312  1.0146  11.00000  0.05    0.65
Q3    1   0.6026  0.1755  0.3585  11.00000  0.05    0.60
Q4    1   0.7939  0.2145  0.4850  11.00000  0.05    0.55
Q5    1   1.2258  0.1459  0.5836  11.00000  0.05    0.52
Q6    1   0.5643  0.2709  0.2939  11.00000  0.05    0.52
Q7    1   0.5051 -0.1768  0.8582  11.00000  0.05    0.49
Q8    1   0.8651  0.4628  1.1521  11.00000  0.05    0.46
Q9    1   0.5865 -0.1533  0.7788  11.00000  0.05    0.45
Q10   1   0.2571  0.5682  0.6422  11.00000  0.05    0.45
Q11   1   0.3114  0.4653  0.4296  11.00000  0.05    0.44
Q12   1   1.0594 -0.2803  0.9167  11.00000  0.05    0.43
Q13   1   0.7834  0.3504  0.5710  11.00000  0.05    0.42
Q14   1   0.9636  0.5260  0.5701  11.00000  0.05    0.41
Q15   1   0.6459  0.6373  1.0033  11.00000  0.05    0.40
Q16   1   0.7497  0.2181  0.5394  11.00000  0.05    0.39
Q17   1   0.3708  0.7184  0.9216  11.00000  0.05    0.36
Q18   1   0.9212  0.2661  0.4411  11.00000  0.05    0.36
Q19   1   0.2756  0.6894  0.9499  11.00000  0.05    0.36
Q20   1   1.2413  0.3392  0.5372  11.00000  0.05    0.36
Q21   1   0.3382  0.4975  0.4222  11.00000  0.05    0.36
Q22   1   0.9260 -0.1844  1.0466  11.00000  0.05    0.36
Q23   1   0.3270  0.5083  0.5320  11.00000  0.05    0.35
Q24   1   0.2816  0.4796  0.5066  11.00000  0.05    0.35
Q25   1   0.9855 -0.1908  1.0714  11.00000  0.05    0.35
Q26   1   0.7581  0.0276  0.4804  11.00000  0.05    0.34
Q27   1   0.7652 -0.2756  0.6997  11.00000  0.05    0.34
Q28   1   0.5781 -0.0967  0.8724  11.00000  0.05    0.33
Q29   1   1.3530  0.3090  0.7694  11.00000  0.05    0.33
Q30   1   1.3052  0.2167  0.8360  11.00000  0.05    0.33
Q31   1   0.6282 -0.0017  0.9613  11.00000  0.05    0.32
Q32   1   0.3083  0.1704  1.0258  11.00000  0.05    0.32
Q33   1   0.9155  0.3877  1.1372  11.00000  0.05    0.31
Q34   1   0.8638  0.7346  0.7804  11.00000  0.05    0.30
Q35   1   0.7804  0.0683  0.4891  11.00000  0.05    0.30
Q36   1   0.7823  0.1593  0.7902  11.00000  0.05    0.29
Q37   1   0.8944  0.5592  1.1130  11.00000  0.05    0.29
Q38   1   0.2518  0.6348  0.6369  11.00000  0.05    0.29
Q39   1   0.2440  0.5204  0.6699  11.00000  0.05    0.28
Q40   1   0.2571  0.5060  0.6632  11.00000  0.05    0.28
Q41   1   1.0181 -0.2817  0.9813  11.00000  0.05    0.28
Q42   1   0.6055  0.2580  0.3386  11.00000  0.05    0.27
Q43   1   0.5943  0.2724  0.7398  11.00000  0.05    0.27
Q44   1   0.5422 -0.0859  0.9162  11.00000  0.05    0.27
Q45   1   0.2282  0.4752  0.7176  11.00000  0.05    0.27
Q46   1   0.8538 -0.2781  0.5981  11.00000  0.05    0.27
Q47   1   0.8418  0.2864  0.6388  11.00000  0.05    0.26
Q48   1   1.0240 -0.2184  0.9487  11.00000  0.05    0.26
Q49   1   1.1625  0.3228  0.5520  11.00000  0.05    0.26
Q50   1   0.7743  0.1758  0.6200  11.00000  0.05    0.25
Q51   1   0.2938  0.6243  0.6237  11.00000  0.05    0.25
Q52   1   0.4783  0.1038  0.7157  11.00000  0.05    0.25
Q53   1   0.2663  0.5072  0.4942  11.00000  0.05    0.25
Q54   1   0.9201  0.5691  0.7072  11.00000  0.05    0.25
Q55   1   1.1443  0.2924  0.6715  11.00000  0.05    0.24
Q56   1   0.7650  0.3060  0.6100  11.00000  0.05    0.24
Q57   1   0.6843 -0.0295  0.6176  11.00000  0.05    0.24
Q58   1   0.1727  0.6511  0.6992  11.00000  0.05    0.24
Q59   1   0.6796  0.2410  0.3359  11.00000  0.05    0.24
Q60   1   0.3751 -0.0304  0.7589  11.00000  0.05    0.23
;
_shelx_res_checksum               73650
_shelx_hkl_file
;
   1   0   0 0.40251 0.13239   2
  -2   0   0 230.617 5.55008   2
  -2   0   0 211.985 5.74042   5
   2   0   0 235.073 5.56016   2
   2   0   0 233.378 5.78278   5
   2   0   0 234.621 5.50356   4
  -3   0   0 21.4285 1.60597   5
   3   0   0 22.7057 1.19660   4
   3   0   0 19.5895 1.17647   2
   3   0   0 18.8498 1.49727   5
  -4   0   0 456.752 11.8954   5
   4   0   0 478.035 11.4529   2
   4   0   0 481.442 11.8813   5
   4   0   0 477.633 11.3514   4
  -5   0   0 17.9658 1.89397   5
   5   0   0 18.4921 1.35181   2
   5   0   0 13.8581 1.12095   4
   5   0   0 12.7778 1.26138   7
   5   0   0 15.8526 1.66929   5
  -6   0   0 7.74290 1.65396   5
   6   0   0 9.53131 1.17018   4
   6   0   0 6.91085 1.05687   2
   6   0   0 5.95185 1.39309   5
   6   0   0 8.23127 1.23160   7
  -7   0   0 34.6014 2.78518   5
   7   0   0 35.5895 1.89107   4
   7   0   0 34.1366 2.20076   7
   7   0   0 35.0495 2.51467   5
   7   0   0 35.9296 2.03191   2
   8   0   0 90.3208 3.40354   7
   8   0   0 85.7503 3.93297   5
   8   0   0 81.7560 3.29554   2
   8   0   0 86.0506 3.25005   4
   9   0   0 306.192 9.35017   5
   9   0   0 296.553 8.18200   4
   9   0   0 293.334 8.38422   2
   9   0   0 300.179 8.40880   7
  10   0   0 2.38295 1.32641   2
  10   0   0 2.83347 1.23654   7
  10   0   0 1.50334 1.04660   4
  11   0   0 8.93776 1.60978   4
  11   0   0 7.11938 1.63956   2
  12   0   0 2.52310 1.27590   4
  12   0   0 4.03378 1.54331   2
  13   0   0 329.967 9.63097   4
  13   0   0 338.938 9.96316   2
  14   0   0 1.96043 1.46861   2
  14   0   0 -1.5750 1.41859   4
  15   0   0 52.1386 3.49292   2
  15   0   0 45.9757 3.32283   4
  16   0   0 24.0159 2.77011   4
  16   0   0 23.6761 3.00525   1
  16   0   0 19.0039 2.74678   2
  17   0   0 14.6929 2.43764   4
  17   0   0 15.3321 2.67006   2
  17   0   0 16.1356 2.74290   1
  18   0   0 4.24404 2.09235   1
  18   0   0 3.29890 1.89130   2
  18  -1   0 7.50747 2.42441   2
  18  -1   0 14.8027 2.94915   1
  17  -1   0 2.31106 1.90640   1
  17  -1   0 -1.4279 1.53664   4
  17  -1   0 1.67617 2.03022   2
  16  -1   0 16.5213 2.35943   4
  16  -1   0 15.7258 2.52012   2
  15  -1   0 -1.0947 1.50668   4
  15  -1   0 0.74480 1.61744   2
  14  -1   0 22.1561 2.62364   2
  14  -1   0 21.3895 2.42446   4
  13  -1   0 51.6143 1.99794   3
  13  -1   0 46.3590 3.47324   2
  13  -1   0 45.2872 2.88753   4
  13  -1   0 51.8415 1.73267   3
  12  -1   0 10.0963 1.65458   4
  12  -1   0 9.01473 0.66129   3
  12  -1   0 11.3646 1.86549   2
  12  -1   0 10.2534 0.70629   3
  11  -1   0 0.28188 1.12415   4
  11  -1   0 2.10490 1.29020   2
  11  -1   0 1.19190 0.30441   3
  10  -1   0 30.5511 2.32735   2
  10  -1   0 29.6657 2.27113   4
  10  -1   0 31.3656 2.23916   7
 -10   1   0 36.3747 3.50015   5
   9  -1   0 3.01392 1.15377   7
   9  -1   0 3.10026 1.04628   4
   9  -1   0 2.68549 1.11444   2
   9  -1   0 1.05939 1.41509   5
  -9   1   0 0.74509 1.66653   5
   8  -1   0 242.362 6.98448   2
   8  -1   0 233.521 6.69600   4
   8  -1   0 244.511 6.88477   7
   8  -1   0 242.542 7.59181   5
  -8   1   0 241.524 7.88872   5
   7  -1   0 521.387 13.0024   4
   7  -1   0 524.411 13.2556   2
   7  -1   0 540.650 13.8696   5
  -7   1   0 516.726 13.9874   5
   6  -1   0 6.68422 1.07841   4
   6  -1   0 4.39485 1.31150   5
   6  -1   0 8.61288 1.18626   2
  -6   1   0 6.65012 1.13147   2
  -6   1   0 6.40997 0.93478   4
  -6   1   0 6.68421 1.58357   5
   5  -1   0 97.5953 3.21886   2
   5  -1   0 94.8785 2.97874   4
  -5   1   0 96.9616 3.18589   2
  -5   1   0 95.0389 2.95948   4
  -5   1   0 92.2189 3.62221   5
   4  -1   0 50.0746 2.32627   5
   4  -1   0 51.7656 2.10677   2
   4  -1   0 49.7760 1.92505   4
  -4   1   0 52.7821 1.93629   4
  -4   1   0 51.7246 2.43454   5
  -4   1   0 52.6004 2.09492   2
   3  -1   0 119.983 3.40588   2
   3  -1   0 114.877 3.22676   4
   3  -1   0 122.800 3.63148   5
  -3   1   0 117.697 3.41230   2
  -3   1   0 117.584 3.24547   4
  -3   1   0 117.254 3.63104   5
   2  -1   0 39.6636 1.27711   4
   2  -1   0 40.4726 1.55451   5
   2  -1   0 36.4823 1.42436   2
   2  -1   0 36.8901 1.08281   3
   2  -1   0 38.9741 1.10930   3
  -2   1   0 39.0435 1.31427   4
  -2   1   0 39.2117 1.53386   5
  -2   1   0 38.8889 1.43620   2
   1  -1   0 21.4437 0.73904   3
   1  -1   0 22.3206 0.90076   1
   1  -1   0 20.2431 0.74195   3
   1  -1   0 21.0239 0.73315   4
  -1   1   0 22.1798 0.84483   2
   0  -1   0 -0.0304 0.18158   1
   0   1   0 -0.0493 0.08363   2
   1   1   0 19.7260 0.68635   6
   1   1   0 20.8605 0.74966   1
  -2  -1   0 18.2850 0.97157   7
  -2  -1   0 20.3433 0.95677   1
  -2  -1   0 16.2501 0.86021   6
   2   1   0 18.1105 0.99301   7
   2   1   0 22.6378 0.91390   6
   2   1   0 22.2135 0.98324   1
  -3  -1   0 70.5029 2.35583   7
   3   1   0 73.6202 2.30094   6
   3   1   0 67.7714 2.31018   1
   3   1   0 72.4932 2.33751   7
   4   1   0 17.8538 1.57852   5
   5   1   0 2.19328 1.26819   5
   5   1   0 1.07700 0.84588   7
   5   1   0 2.42440 0.80706   2
   5   1   0 3.76596 0.89075   6
   6   1   0 453.279 11.3547   2
   6   1   0 455.105 11.4108   6
   6   1   0 467.557 12.1316   5
   6   1   0 452.456 11.4965   7
   7   1   0 568.498 14.0581   4
   7   1   0 576.831 14.3154   7
   7   1   0 564.796 14.1188   2
   7   1   0 580.391 14.9929   5
   7   1   0 574.116 14.2273   6
   8   1   0 47.4020 2.47822   7
   8   1   0 48.8645 2.58239   6
   8   1   0 44.2705 2.98915   5
   8   1   0 47.4565 2.45278   2
   8   1   0 45.2922 2.27714   4
   9   1   0 54.4437 3.86328   5
   9   1   0 54.8023 2.78670   2
   9   1   0 56.3550 2.97502   7
   9   1   0 56.9758 2.71305   4
   9   1   0 58.0977 2.92680   6
  10   1   0 139.673 4.71134   4
  10   1   0 140.842 4.84853   2
  11   1   0 11.9484 1.61156   4
  11   1   0 15.2464 1.81609   2
  12   1   0 10.4572 1.70642   4
  12   1   0 10.2285 1.81564   2
  13   1   0 1.59701 1.33382   2
  13   1   0 3.36881 1.54169   4
  13   1   0 0.49239 1.47207   1
  14   1   0 1.04589 1.54990   4
  14   1   0 2.79474 1.89028   1
  14   1   0 4.26645 1.80731   2
  15   1   0 -0.0774 1.41389   2
  15   1   0 1.91634 1.70196   4
  15   1   0 -0.4800 1.65722   1
  16   1   0 -5.2891 1.55580   4
  16   1   0 -0.6848 1.73960   1
  16   1   0 -0.1253 1.70514   2
  17   1   0 -3.0692 1.68560   4
  17   1   0 0.00417 1.58248   2
  17   1   0 0.51105 1.76917   1
  18   1   0 4.71454 2.18930   1
  18   1   0 7.04082 2.26658   2
  18  -2   0 0.27696 1.80721   2
  17  -2   0 -0.9088 1.55200   4
  17  -2   0 1.81259 1.82471   2
  16  -2   0 5.25645 1.95471   2
  16  -2   0 2.56625 1.73041   4
  15  -2   0 3.91009 1.79390   2
  15  -2   0 0.72024 1.51888   4
  14  -2   0 5.57955 1.79727   2
  14  -2   0 0.19131 1.23836   4
  13  -2   0 8.81500 1.76212   4
  13  -2   0 12.0201 2.09392   2
  13  -2   0 10.7582 1.14511   3
  12  -2   0 56.4776 2.08453   3
  12  -2   0 55.6596 3.06227   4
  12  -2   0 53.3324 3.54771   2
  12  -2   0 60.2899 2.19346   3
  11  -2   0 31.6887 2.42941   4
  11  -2   0 37.2851 2.78353   2
  11  -2   0 37.3686 1.55987   3
  11  -2   0 40.2716 1.65095   3
 -11   2   0 45.5824 4.01080   5
  10  -2   0 107.454 4.34465   2
  10  -2   0 108.800 3.02479   3
  10  -2   0 107.973 4.09419   7
  10  -2   0 111.135 3.07319   3
  10  -2   0 100.304 3.93219   4
 -10   2   0 106.335 5.31369   5
   9  -2   0 18.9683 1.92890   2
   9  -2   0 23.4778 2.49548   5
   9  -2   0 17.7333 1.64742   4
   9  -2   0 19.1219 1.08797   3
   9  -2   0 20.0429 1.04976   3
  -9   2   0 25.5924 2.78316   5
   8  -2   0 72.8755 2.97838   4
   8  -2   0 74.6748 3.27859   2
   8  -2   0 74.5431 2.19901   3
   8  -2   0 72.1125 3.58944   5
   8  -2   0 74.7280 2.17091   3
  -8   2   0 73.1598 3.81448   5
  -8   2   0 79.6482 3.02578   4
  -8   2   0 73.4193 3.24917   2
   7  -2   0 447.118 11.1610   4
   7  -2   0 448.307 11.5415   2
   7  -2   0 443.098 11.9711   5
   7  -2   0 431.192 10.4228   3
   7  -2   0 455.200 10.4764   3
  -7   2   0 443.303 11.4987   2
  -7   2   0 440.057 11.1712   4
  -7   2   0 442.447 12.1495   5
   6  -2   0 27.2346 1.70574   4
   6  -2   0 30.1277 1.96973   2
   6  -2   0 27.4571 1.16076   3
   6  -2   0 27.3713 2.09359   5
   6  -2   0 27.8367 1.11480   3
  -6   2   0 26.1697 1.68251   4
  -6   2   0 27.3506 1.95068   2
  -6   2   0 27.5936 2.33578   5
   5  -2   0 408.032 10.1802   4
   5  -2   0 421.930 10.8096   5
   5  -2   0 422.138 9.79904   3
   5  -2   0 411.422 10.5038   2
   5  -2   0 411.985 9.75405   3
  -5   2   0 416.269 10.2262   4
  -5   2   0 411.505 10.8680   5
  -5   2   0 413.609 10.5052   2
   4  -2   0 318.347 8.17275   5
   4  -2   0 307.829 7.42243   3
   4  -2   0 301.238 7.36892   3
   4  -2   0 307.789 7.68337   4
   4  -2   0 311.370 7.96367   2
  -4   2   0 312.135 7.94507   2
  -4   2   0 307.519 8.23355   5
  -4   2   0 302.653 7.68120   4
   3  -2   0 201.330 5.04763   3
   3  -2   0 200.659 5.43493   2
   3  -2   0 206.521 5.20293   4
   3  -2   0 210.029 5.65627   5
   3  -2   0 205.777 5.12017   3
  -3   2   0 199.699 4.84659   3
  -3   2   0 208.383 5.23459   4
  -3   2   0 205.509 4.87633   3
  -3   2   0 200.536 5.60184   5
  -3   2   0 202.883 5.44879   2
   2  -2   0 252.953 6.20125   3
   2  -2   0 259.553 6.15703   3
   2  -2   0 253.135 6.45363   1
   2  -2   0 256.187 6.19655   4
   2  -2   0 248.481 6.33974   2
  -2   2   0 252.037 6.45152   5
  -2   2   0 248.328 6.12383   3
  -2   2   0 254.869 6.36156   2
  -2   2   0 244.260 6.15990   4
  -2   2   0 256.317 6.06664   3
   1  -2   0 35.1575 1.27059   2
   1  -2   0 34.8060 1.32778   3
   1  -2   0 39.5830 1.44356   3
   1  -2   0 37.2962 1.51257   1
   1  -2   0 36.9015 1.25543   4
  -1   2   0 38.2397 1.25928   4
  -1   2   0 37.1257 1.30530   3
  -1   2   0 35.7760 1.35500   2
  -1   2   0 37.6040 1.37334   3
  -1   2   0 36.0899 1.38639   1
   0  -2   0 39.7608 1.35041   1
   0  -2   0 39.7083 1.26809   4
   0  -2   0 37.9027 1.34027   3
   0  -2   0 39.7592 1.32573   3
   0   2   0 37.1678 1.21768   2
   0   2   0 38.2118 1.33881   3
   0   2   0 36.8208 1.24141   4
   0   2   0 40.6846 1.34051   3
   0   2   0 39.7668 1.34264   1
  -1  -2   0 6.16876 0.50418   3
  -1  -2   0 6.34423 0.64249   1
  -1  -2   0 6.40460 0.62368   7
   1   2   0 6.26220 0.65537   1
   1   2   0 6.78543 0.60589   4
   1   2   0 6.08483 0.60904   7
   1   2   0 6.07215 0.54054   3
   1   2   0 5.50811 0.50253   3
   1   2   0 7.48581 0.51738   2
  -2  -2   0 333.543 8.07594   7
  -2  -2   0 329.384 7.94310   6
  -2  -2   0 331.262 8.02982   1
   2   2   0 340.552 7.67336   3
   2   2   0 328.812 7.91937   6
   2   2   0 330.995 7.66248   3
   2   2   0 328.560 8.05739   7
   2   2   0 323.399 8.02739   1
  -3  -2   0 388.958 9.58687   6
  -3  -2   0 393.890 9.78239   7
  -3  -2   0 408.544 9.71463   1
   3   2   0 398.173 9.76402   7
   3   2   0 410.426 9.61509   6
   3   2   0 389.024 9.70264   1
  -4  -2   0 1299.67 30.2656   6
  -4  -2   0 1313.13 30.4556   7
   4   2   0 1289.49 30.2264   6
   4   2   0 1328.26 30.4172   7
   4   2   0 1301.40 30.3556   1
  -5  -2   0 870.006 20.7032   7
   5   2   0 885.027 20.4832   6
   5   2   0 854.117 20.5826   1
   5   2   0 852.631 20.6158   7
   6   2   0 620.566 16.0469   5
   6   2   0 623.984 15.4294   7
   6   2   0 618.834 15.3759   1
   6   2   0 645.949 15.3079   6
   7   2   0 9.59306 1.40617   1
   7   2   0 11.6291 1.33880   2
   7   2   0 8.87810 1.84247   5
   7   2   0 11.9019 1.46816   7
   7   2   0 11.3804 1.40654   6
   8   2   0 36.9529 2.99879   5
   8   2   0 34.5582 2.19454   7
   8   2   0 32.0167 2.20244   1
   8   2   0 32.6137 2.06492   6
   8   2   0 30.8503 1.93453   2
   9   2   0 68.9466 3.14561   7
   9   2   0 66.1226 2.88453   2
   9   2   0 67.5326 3.17647   1
   9   2   0 65.8567 2.86434   4
   9   2   0 63.1537 2.95101   6
  10   2   0 51.3926 2.96773   1
  10   2   0 54.0319 2.86630   2
  10   2   0 57.6653 2.76236   4
  11   2   0 105.951 4.40473   1
  11   2   0 104.341 4.02566   4
  11   2   0 100.844 4.04080   2
  12   2   0 24.3487 2.47559   1
  12   2   0 27.8834 2.41825   4
  12   2   0 23.6144 2.26347   2
  13   2   0 -0.3984 1.39652   4
  13   2   0 4.38464 1.47015   2
  13   2   0 1.68443 1.57247   1
  14   2   0 5.66118 1.63846   2
  14   2   0 3.99619 1.70737   4
  14   2   0 5.75594 2.05314   1
  15   2   0 -0.4901 1.36845   4
  15   2   0 0.49404 1.77769   1
  15   2   0 1.87853 1.65613   2
  16   2   0 0.93685 1.87536   4
  16   2   0 -1.9960 1.52157   2
  16   2   0 1.65433 2.09719   1
  17   2   0 0.72482 1.71079   2
  17   2   0 -0.1190 1.79301   1
  17   2   0 0.15072 1.78952   4
  18   2   0 2.57665 2.08532   1
  18   2   0 1.03646 1.64495   2
  18   2   0 -0.7060 1.97215   4
  17  -3   0 5.54201 2.47836   2
  16  -3   0 1.55711 1.81232   2
  16  -3   0 -3.6657 1.43057   4
  15  -3   0 -0.0853 1.48227   4
  15  -3   0 2.81390 1.85815   2
  14  -3   0 30.0234 3.10238   2
  14  -3   0 31.8453 2.73920   4
  13  -3   0 77.7858 3.78341   4
  13  -3   0 77.1989 2.94226   3
  13  -3   0 78.4527 4.21597   2
 -13   3   0 75.8882 5.51540   5
  12  -3   0 75.4938 2.90782   3
  12  -3   0 76.2050 4.03408   2
  12  -3   0 74.8239 2.78714   3
  12  -3   0 77.5241 3.57721   4
 -12   3   0 71.5210 4.81021   5
  11  -3   0 27.0268 1.73896   3
  11  -3   0 21.3999 2.38716   2
  11  -3   0 25.9715 1.62304   3
  11  -3   0 24.5843 2.20004   4
 -11   3   0 22.4720 3.04974   5
  10  -3   0 162.376 4.50474   3
  10  -3   0 165.263 5.71667   2
  10  -3   0 156.724 4.56816   3
  10  -3   0 156.531 5.16732   4
 -10   3   0 151.839 6.31814   5
   9  -3   0 43.7450 1.85187   3
   9  -3   0 45.5049 1.98100   3
   9  -3   0 40.9601 2.38584   4
   9  -3   0 44.7621 2.79925   2
  -9   3   0 45.6672 3.57781   5
  -9   3   0 42.2667 2.40948   4
   8  -3   0 180.927 6.22978   5
   8  -3   0 180.576 5.78682   2
   8  -3   0 179.816 5.30449   4
   8  -3   0 180.925 4.87254   3
   8  -3   0 173.798 4.75523   3
  -8   3   0 165.300 6.17583   5
  -8   3   0 177.789 5.36109   4
   7  -3   0 118.533 3.52647   3
   7  -3   0 122.594 4.63748   5
   7  -3   0 125.232 3.64637   3
   7  -3   0 116.723 3.96668   4
   7  -3   0 128.078 4.42916   2
  -7   3   0 131.912 4.09750   4
  -7   3   0 127.530 4.41500   2
  -7   3   0 122.818 4.81847   5
   6  -3   0 586.802 14.6468   4
   6  -3   0 615.573 15.4172   5
   6  -3   0 607.856 14.4230   3
   6  -3   0 593.887 14.3044   3
   6  -3   0 593.989 15.0755   2
  -6   3   0 623.130 15.1366   2
  -6   3   0 603.707 14.7286   4
  -6   3   0 609.485 15.5170   5
   5  -3   0 352.713 9.34789   5
   5  -3   0 346.267 8.60540   3
   5  -3   0 348.901 9.12085   2
   5  -3   0 355.798 8.79456   4
   5  -3   0 349.311 8.51543   3
  -5   3   0 337.338 8.76817   4
  -5   3   0 344.770 9.12392   2
  -5   3   0 345.168 9.41714   5
   4  -3   0 288.705 7.31438   3
   4  -3   0 297.793 7.94267   5
   4  -3   0 298.363 7.42320   3
   4  -3   0 298.145 7.44205   4
   4  -3   0 295.331 7.75626   2
  -4   3   0 289.715 7.04915   3
  -4   3   0 295.433 7.49589   4
  -4   3   0 299.629 7.02772   3
  -4   3   0 295.310 7.98822   5
  -4   3   0 289.231 7.75253   2
   3  -3   0 967.171 22.6538   3
   3  -3   0 978.874 22.8617   2
   3  -3   0 970.848 22.9864   1
   3  -3   0 944.604 22.5511   3
   3  -3   0 1002.43 22.6308   4
  -3   3   0 984.404 22.5089   3
  -3   3   0 977.353 22.4277   3
  -3   3   0 964.020 22.8547   2
  -3   3   0 974.348 22.6247   4
  -3   3   0 950.884 23.0011   5
   2  -3   0 1847.43 42.6639   1
   2  -3   0 1767.74 42.3686   3
   2  -3   0 1878.14 43.4779   2
   2  -3   0 1878.52 42.9754   4
   2  -3   0 1888.98 42.4830   3
  -2   3   0 1765.40 42.3853   3
  -2   3   0 1970.11 42.9616   3
  -2   3   0 1884.20 42.5431   2
  -2   3   0 1790.14 42.6549   1
  -2   3   0 1836.80 43.5735   4
   1  -3   0 53.6431 1.93395   2
   1  -3   0 54.8303 2.04141   3
   1  -3   0 53.7786 2.22362   1
   1  -3   0 52.5272 1.84641   4
   1  -3   0 52.8994 1.91723   3
  -1   3   0 54.0232 2.05817   1
  -1   3   0 54.8643 2.02722   3
  -1   3   0 55.6425 1.89916   3
  -1   3   0 53.3702 1.96022   2
  -1   3   0 52.0693 1.81909   4
   0  -3   0 219.786 5.69773   3
   0  -3   0 228.764 5.80995   1
   0  -3   0 224.816 5.56412   2
   0  -3   0 224.688 5.61292   4
   0  -3   0 230.115 5.65966   3
   0   3   0 221.997 5.55120   2
   0   3   0 224.518 5.60949   4
   0   3   0 224.134 5.82981   1
   0   3   0 219.935 5.62673   3
   0   3   0 224.752 5.75671   3
  -1  -3   0 138.544 3.60727   3
  -1  -3   0 134.449 3.67352   4
  -1  -3   0 134.550 3.47128   2
  -1  -3   0 133.574 3.62170   3
  -1  -3   0 136.935 3.70060   7
  -1  -3   0 140.383 3.83510   1
   1   3   0 140.391 3.70048   7
   1   3   0 136.192 3.83289   1
   1   3   0 134.816 3.67913   3
   1   3   0 132.036 3.45966   2
   1   3   0 132.276 3.60414   3
   1   3   0 139.682 3.68016   4
  -2  -3   0 5.69693 0.61680   3
  -2  -3   0 7.64948 0.66657   2
  -2  -3   0 7.22927 0.99843   1
  -2  -3   0 5.16963 0.96923   7
  -2  -3   0 6.39609 0.87087   6
   2   3   0 6.01989 0.96220   7
   2   3   0 7.36316 0.77444   3
   2   3   0 4.86953 0.66843   3
   2   3   0 5.03467 0.58453   2
   2   3   0 8.30930 1.03146   1
  -3  -3   0 2950.07 65.9905   6
  -3  -3   0 2819.97 66.8098   7
  -3  -3   0 2828.21 65.3680   1
   3   3   0 2725.45 65.4198   1
   3   3   0 2865.29 65.3474   3
   3   3   0 2814.55 66.2896   6
   3   3   0 2782.96 64.6275   7
   3   3   0 2818.69 64.7956   3
  -4  -3   0 2.36040 0.86351   1
  -4  -3   0 3.31849 1.08452   7
  -4  -3   0 4.38482 0.90247   6
   4   3   0 3.17308 0.98746   1
   4   3   0 3.67728 0.82562   6
   4   3   0 2.24069 0.96642   7
  -5  -3   0 28.1144 1.74810   1
  -5  -3   0 24.8728 1.88922   7
  -5  -3   0 27.1642 1.63451   6
   5   3   0 26.0842 1.80241   1
   5   3   0 29.4500 1.69699   6
   5   3   0 27.2724 1.82198   7
  -6  -3   0 172.134 5.03435   6
  -6  -3   0 164.570 5.26496   7
   6   3   0 171.817 5.19424   7
   6   3   0 173.626 4.96719   6
   6   3   0 172.234 5.17588   1
  -7  -3   0 153.711 5.14952   7
   7   3   0 158.877 5.13126   7
   7   3   0 159.131 5.78382   5
   7   3   0 159.308 5.07182   1
   7   3   0 159.499 4.84494   6
   8   3   0 186.889 5.61031   6
   8   3   0 184.316 5.82497   1
   8   3   0 181.347 6.57049   5
   8   3   0 191.451 5.88404   7
   9   3   0 37.7940 2.26136   2
   9   3   0 36.9622 2.44025   7
   9   3   0 35.3541 2.22138   6
   9   3   0 35.6176 2.45786   1
  10   3   0 128.089 4.78563   1
  10   3   0 120.666 4.37905   2
  11   3   0 -1.2815 1.15679   1
  11   3   0 -0.2212 1.03209   4
  11   3   0 -1.1932 1.08176   2
  12   3   0 0.50321 1.37037   4
  12   3   0 1.34977 1.33126   2
  12   3   0 0.84242 1.35901   1
  13   3   0 163.459 6.21759   1
  13   3   0 163.497 5.83672   4
  13   3   0 162.856 5.75347   2
  14   3   0 8.80558 1.94968   4
  14   3   0 6.67267 1.85323   2
  14   3   0 12.3960 2.16697   1
  15   3   0 -0.9136 1.41401   4
  15   3   0 1.40554 1.77943   1
  15   3   0 3.27615 1.66768   2
  16   3   0 64.7968 4.39303   1
  16   3   0 70.5033 4.09190   2
  16   3   0 68.4222 4.12187   4
  17   3   0 -1.0437 1.73778   1
  17   3   0 -2.6968 1.50457   2
  17   3   0 4.25156 1.98836   4
  18   3   0 -2.0191 1.80275   4
  18   3   0 -0.4033 1.76841   2
  18   3   0 -1.8360 2.19787   1
  17  -4   0 -0.3809 2.04134   2
  16  -4   0 0.01813 1.53832   4
  16  -4   0 3.82193 2.10651   2
  15  -4   0 94.6919 4.34018   4
  15  -4   0 80.5275 4.74903   2
  14  -4   0 9.25553 2.26596   2
  14  -4   0 8.39620 1.79314   4
 -14   4   0 8.98290 2.92544   5
  13  -4   0 10.7736 1.91189   4
  13  -4   0 14.4255 2.34294   2
  13  -4   0 11.5385 1.50322   3
 -13   4   0 15.6483 3.01978   5
  12  -4   0 2.46587 1.15908   3
  12  -4   0 2.79013 1.12095   3
  12  -4   0 7.11872 1.91231   2
  12  -4   0 3.95405 1.50770   4
 -12   4   0 6.11121 2.34214   5
  11  -4   0 186.554 6.04193   4
  11  -4   0 191.213 5.67264   3
  11  -4   0 192.883 6.71929   2
  11  -4   0 191.591 5.53909   3
 -11   4   0 184.689 7.52709   5
  10  -4   0 43.4252 2.58801   4
  10  -4   0 45.0683 2.20059   3
  10  -4   0 49.0832 3.11784   2
  10  -4   0 48.9807 2.40032   3
 -10   4   0 45.5580 2.66290   4
 -10   4   0 40.3970 3.76417   5
   9  -4   0 2.29592 1.43794   2
   9  -4   0 1.36082 0.83990   3
   9  -4   0 0.91864 0.95737   3
   9  -4   0 1.94945 1.01502   4
  -9   4   0 1.44828 1.03402   4
  -9   4   0 1.43414 1.65114   5
   8  -4   0 194.395 5.67020   4
   8  -4   0 183.151 5.39739   3
   8  -4   0 178.572 6.06694   2
   8  -4   0 195.217 6.46232   5
   8  -4   0 193.025 5.31350   3
  -8   4   0 194.754 5.71097   4
  -8   4   0 183.481 6.56372   5
   7  -4   0 3.70328 1.26885   2
   7  -4   0 1.76517 0.99891   4
   7  -4   0 1.97728 0.94650   3
   7  -4   0 2.73152 0.89188   3
   7  -4   0 2.31744 1.31655   5
  -7   4   0 2.02456 0.96561   4
  -7   4   0 2.21231 1.24613   2
  -7   4   0 2.53129 1.46669   5
   6  -4   0 46.0026 2.09135   3
   6  -4   0 52.6990 2.28932   3
   6  -4   0 46.9470 2.78765   1
   6  -4   0 44.2215 2.20859   4
   6  -4   0 47.7904 2.71424   5
   6  -4   0 44.2142 2.57244   2
  -6   4   0 47.2351 2.33072   4
  -6   4   0 51.6561 2.68085   2
  -6   4   0 49.3578 3.07021   5
   5  -4   0 6.26272 1.27308   2
   5  -4   0 5.59902 1.11367   3
   5  -4   0 9.57695 1.13653   4
   5  -4   0 8.02669 1.47787   1
   5  -4   0 6.42795 1.04767   3
  -5   4   0 8.27452 1.37682   2
  -5   4   0 7.53065 1.15995   4
  -5   4   0 7.52262 0.73881   3
  -5   4   0 9.18833 1.69238   5
  -5   4   0 7.69813 0.69139   3
   4  -4   0 130.448 4.17942   2
   4  -4   0 135.056 3.92070   3
   4  -4   0 129.362 3.88416   4
   4  -4   0 135.590 4.02159   3
   4  -4   0 133.284 4.37672   1
  -4   4   0 131.231 3.89881   4
  -4   4   0 127.169 4.35807   5
  -4   4   0 128.632 3.60736   3
  -4   4   0 127.082 3.70120   3
  -4   4   0 131.226 4.15493   2
   3  -4   0 115.511 3.59948   3
   3  -4   0 123.656 4.01926   1
   3  -4   0 117.040 3.55785   4
   3  -4   0 121.653 3.81007   2
   3  -4   0 123.825 3.75512   3
  -3   4   0 119.264 3.60069   3
  -3   4   0 120.472 3.54265   4
  -3   4   0 120.809 3.81389   2
  -3   4   0 117.826 3.44487   3
   2  -4   0 8.71939 1.03629   4
   2  -4   0 6.83639 1.26019   1
   2  -4   0 8.41020 1.07076   3
   2  -4   0 8.10224 1.06551   2
   2  -4   0 10.8718 1.28806   3
  -2   4   0 6.46009 1.23020   1
  -2   4   0 8.68384 1.14417   3
  -2   4   0 7.71232 0.98558   3
  -2   4   0 7.20320 0.91489   4
  -2   4   0 7.61471 1.08247   2
   1  -4   0 788.963 18.3883   3
   1  -4   0 799.683 18.3525   2
   1  -4   0 777.327 18.5704   1
   1  -4   0 761.816 18.2858   4
   1  -4   0 795.098 18.4858   3
  -1   4   0 766.122 18.4704   3
  -1   4   0 766.917 18.2712   4
  -1   4   0 777.615 18.3338   3
  -1   4   0 762.718 18.5847   1
  -1   4   0 790.102 18.3501   2
   0  -4   0 9106.06 212.578   1
   0  -4   0 9117.69 211.722   4
   0  -4   0 9113.97 212.049   3
   0  -4   0 9894.75 212.007   3
   0  -4   0 8793.42 210.852   2
   0   4   0 8771.05 211.437   4
   0   4   0 8886.15 211.008   2
   0   4   0 9031.97 212.416   3
   0   4   0 9999.99 211.682   3
   0   4   0 9005.17 212.814   1
  -1  -4   0 16.3470 1.27219   7
  -1  -4   0 17.3452 1.48743   1
  -1  -4   0 17.4130 1.28847   3
  -1  -4   0 18.6729 1.41604   3
  -1  -4   0 17.4588 1.31439   4
  -1  -4   0 17.0908 1.07135   2
   1   4   0 16.4510 1.54815   1
   1   4   0 16.9944 1.36728   3
   1   4   0 18.1000 1.10236   2
   1   4   0 18.5926 1.36954   4
   1   4   0 18.3299 1.31306   3
  -2  -4   0 214.822 5.54715   3
  -2  -4   0 225.396 5.88740   7
  -2  -4   0 217.074 5.44453   2
  -2  -4   0 221.896 5.52750   3
  -2  -4   0 225.652 5.91870   1
   2   4   0 218.394 5.80289   7
   2   4   0 217.028 5.94866   1
   2   4   0 217.316 5.61614   3
   2   4   0 214.821 5.68234   3
   2   4   0 217.929 5.43734   2
   2   4   0 218.009 5.74343   4
  -3  -4   0 35.6767 1.95323   7
  -3  -4   0 33.3074 1.84371   1
  -3  -4   0 32.6705 1.23979   3
  -3  -4   0 33.7200 1.69692   6
  -3  -4   0 32.4818 1.24218   3
   3   4   0 35.5840 1.51376   3
   3   4   0 34.3090 1.94920   1
   3   4   0 37.0946 1.47572   3
   3   4   0 32.3028 1.34383   2
   3   4   0 35.8450 1.64131   6
   3   4   0 34.0338 1.82860   7
  -4  -4   0 240.978 6.81572   7
  -4  -4   0 250.731 6.73793   1
  -4  -4   0 256.436 6.63234   6
   4   4   0 246.415 6.12266   3
   4   4   0 256.705 6.54674   6
   4   4   0 247.029 6.78554   7
   4   4   0 254.945 6.80925   1
   4   4   0 249.360 6.12973   3
  -5  -4   0 177.876 5.20657   6
  -5  -4   0 175.343 5.29545   1
  -5  -4   0 192.490 5.55500   7
   5   4   0 179.880 4.46705   3
   5   4   0 185.995 5.41665   1
   5   4   0 183.307 4.48266   3
   5   4   0 182.023 5.15820   6
   5   4   0 189.433 5.46725   7
  -6  -4   0 8.67802 1.25248   6
  -6  -4   0 10.3360 1.41950   7
  -6  -4   0 11.4327 1.39117   1
   6   4   0 10.0609 0.48641   3
   6   4   0 11.2636 1.25056   6
   6   4   0 10.2824 0.49015   3
   6   4   0 9.70390 1.47819   7
   6   4   0 10.8750 1.46287   1
  -7  -4   0 72.9423 3.10128   6
  -7  -4   0 69.1925 3.30057   7
   7   4   0 72.5432 3.15595   7
   7   4   0 75.2171 2.91709   6
   7   4   0 72.6823 3.18808   1
  -8  -4   0 19.3497 2.12003   7
  -8  -4   0 23.6873 1.99452   6
   8   4   0 24.3857 2.00385   6
   8   4   0 19.5204 1.95978   1
   8   4   0 20.2551 2.01663   7
   9   4   0 34.1488 2.56201   1
   9   4   0 43.7576 2.50066   6
  10   4   0 41.5827 2.87811   1
  10   4   0 50.7537 2.63978   2
  11   4   0 23.1037 2.44999   1
  11   4   0 25.0309 2.14831   2
  12   4   0 7.09360 1.84338   1
  12   4   0 4.37322 1.47097   2
  13   4   0 4.15381 1.76638   1
  13   4   0 0.75917 1.43264   2
  13   4   0 3.90653 1.44991   4
  14   4   0 2.48966 1.62458   2
  14   4   0 1.93767 1.39256   4
  14   4   0 0.41126 1.63440   1
  15   4   0 -1.6708 1.27982   2
  15   4   0 0.18538 1.53400   4
  15   4   0 -2.5604 1.80330   1
  16   4   0 43.2961 3.29317   4
  16   4   0 39.5572 3.27941   2
  16   4   0 37.2756 3.59147   1
  17   4   0 24.3042 2.81466   4
  17   4   0 20.3218 3.24984   1
  17   4   0 18.7707 2.64139   2
  18   4   0 4.38411 2.18923   4
  18   4   0 4.18353 2.51108   1
  18   4   0 1.05803 1.65105   2
  17  -5   0 5.95221 2.39942   2
  16  -5   0 1.32753 1.62530   4
  16  -5   0 -1.7101 1.94213   2
  15  -5   0 -1.8324 1.41264   4
  15  -5   0 4.20969 2.17091   2
 -15   5   0 3.23769 3.05734   5
  14  -5   0 17.5799 2.27554   4
  14  -5   0 20.2274 2.85240   2
  14  -5   0 19.1858 2.31077   3
 -14   5   0 16.7859 3.38454   5
  13  -5   0 22.1378 2.81531   2
  13  -5   0 30.0732 2.27000   3
  13  -5   0 29.2190 2.52721   4
 -13   5   0 23.0841 3.49264   5
  12  -5   0 28.5437 2.14149   3
  12  -5   0 28.9787 2.95454   2
  12  -5   0 31.6758 2.56692   4
 -12   5   0 28.1911 3.72995   5
  11  -5   0 7.59924 1.58357   4
  11  -5   0 5.30097 1.32017   3
  11  -5   0 8.00283 1.57048   3
  11  -5   0 5.90294 1.80555   2
 -11   5   0 6.32639 2.43915   5
  10  -5   0 -1.2808 1.00320   3
  10  -5   0 1.85491 1.03014   4
  10  -5   0 0.54436 1.00480   3
  10  -5   0 -0.3782 1.41398   2
 -10   5   0 -0.7553 1.67405   5
   9  -5   0 3.09076 1.48888   2
   9  -5   0 1.95103 1.01314   4
   9  -5   0 1.36723 1.02422   3
   9  -5   0 1.81714 1.10146   3
  -9   5   0 0.91381 1.62685   5
  -9   5   0 1.65715 1.22360   4
   8  -5   0 31.3159 1.96257   3
   8  -5   0 30.0005 2.10442   3
   8  -5   0 29.6687 2.05954   4
   8  -5   0 32.2708 2.59520   2
  -8   5   0 34.2447 3.09438   5
  -8   5   0 30.8433 2.04198   4
   7  -5   0 59.4966 2.73200   3
   7  -5   0 58.4441 3.05597   2
   7  -5   0 61.4989 3.29095   1
   7  -5   0 56.3094 2.52476   4
   7  -5   0 59.7732 2.53256   3
  -7   5   0 58.2431 2.63569   4
  -7   5   0 56.8130 3.31365   5
   6  -5   0 146.021 4.60570   3
   6  -5   0 143.656 4.51418   4
   6  -5   0 148.061 5.16262   1
   6  -5   0 148.105 4.97690   2
   6  -5   0 142.027 4.48123   3
  -6   5   0 151.976 3.85955   3
  -6   5   0 141.927 5.19838   5
  -6   5   0 136.976 4.88417   2
  -6   5   0 147.769 4.55897   4
  -6   5   0 143.200 3.79662   3
   5  -5   0 113.151 3.68823   3
   5  -5   0 116.234 3.84353   3
   5  -5   0 113.671 4.24610   1
   5  -5   0 103.886 3.96100   2
   5  -5   0 111.818 3.59614   4
  -5   5   0 106.471 3.32931   3
  -5   5   0 109.101 3.99012   2
  -5   5   0 105.840 3.61397   4
  -5   5   0 110.956 4.36222   5
  -5   5   0 111.537 3.25803   3
   4  -5   0 13.7513 1.51525   3
   4  -5   0 13.7681 1.27415   4
   4  -5   0 13.0775 1.49012   2
   4  -5   0 9.74486 1.26723   3
   4  -5   0 13.7406 1.70620   1
  -4   5   0 14.0861 1.28979   4
  -4   5   0 11.0550 1.23329   3
  -4   5   0 12.0984 1.63219   5
  -4   5   0 11.8506 1.47754   2
  -4   5   0 13.9200 1.17852   3
   3  -5   0 27.7380 1.86686   2
   3  -5   0 27.8671 1.86900   3
   3  -5   0 30.3732 2.01034   3
   3  -5   0 31.5735 1.79619   4
   3  -5   0 30.3234 1.91157   1
  -3   5   0 31.3464 1.70526   3
  -3   5   0 30.6317 1.93498   2
  -3   5   0 28.6220 1.85173   3
  -3   5   0 29.8135 2.17790   1
  -3   5   0 28.5959 1.61788   4
   2  -5   0 706.916 17.1015   2
   2  -5   0 709.659 17.1009   3
   2  -5   0 718.458 17.2309   3
   2  -5   0 707.435 16.9841   4
   2  -5   0 706.102 17.3777   1
  -2   5   0 715.868 17.0154   3
  -2   5   0 708.762 16.9587   4
  -2   5   0 704.795 17.4232   1
  -2   5   0 733.438 17.1651   2
  -2   5   0 706.941 17.1655   3
   1  -5   0 25.2945 1.74102   3
   1  -5   0 22.9195 1.51255   4
   1  -5   0 24.4114 1.52530   2
   1  -5   0 23.9202 1.63894   3
   1  -5   0 24.8651 1.89169   1
  -1   5   0 23.7405 1.90722   1
  -1   5   0 21.8456 1.51848   3
  -1   5   0 24.4129 1.56521   2
  -1   5   0 20.8234 1.42924   4
  -1   5   0 23.1594 1.77716   3
   0  -5   0 273.986 7.20550   4
   0  -5   0 276.465 7.26917   3
   0  -5   0 276.360 7.07374   2
   0  -5   0 279.783 7.38366   3
   0  -5   0 289.417 7.51523   1
   0   5   0 284.097 7.55156   1
   0   5   0 275.253 7.11178   2
   0   5   0 288.779 7.43248   3
   0   5   0 271.427 7.21064   3
   0   5   0 280.760 7.19716   4
  -1  -5   0 6.31111 1.00628   3
  -1  -5   0 7.54896 0.82744   2
  -1  -5   0 6.84856 1.13106   3
  -1  -5   0 6.45388 1.06133   7
  -1  -5   0 7.99026 0.99260   4
  -1  -5   0 8.82968 1.28369   1
   1   5   0 6.36154 1.02644   3
   1   5   0 6.89729 1.01923   4
   1   5   0 6.02474 1.26264   1
   1   5   0 7.57456 0.87171   2
   1   5   0 6.23342 1.22322   3
  -2  -5   0 0.41454 0.74026   3
  -2  -5   0 0.76674 0.57262   2
  -2  -5   0 1.79602 1.03666   1
  -2  -5   0 0.02517 0.80906   3
  -2  -5   0 1.40227 0.93918   7
   2   5   0 2.40853 0.87412   7
   2   5   0 0.35660 1.02347   1
   2   5   0 0.27381 0.91133   3
   2   5   0 0.94024 0.65836   2
   2   5   0 1.35348 0.84946   3
   2   5   0 -0.3982 0.80042   4
  -3  -5   0 120.566 3.31721   3
  -3  -5   0 117.186 3.32008   2
  -3  -5   0 118.836 3.32250   3
  -3  -5   0 117.743 3.64135   6
  -3  -5   0 122.701 3.89897   1
  -3  -5   0 123.020 3.92480   7
   3   5   0 120.340 3.30900   2
   3   5   0 118.256 3.78775   7
   3   5   0 117.954 3.50431   3
   3   5   0 113.715 3.61533   4
   3   5   0 117.564 3.91616   1
   3   5   0 116.087 3.58999   3
  -4  -5   0 84.6491 2.31116   3
  -4  -5   0 83.9186 2.31322   3
  -4  -5   0 84.4565 3.28960   7
  -4  -5   0 86.8837 3.10386   1
  -4  -5   0 85.5569 3.01227   6
   4   5   0 88.4152 2.71494   3
   4   5   0 83.7668 3.24426   1
   4   5   0 85.1695 2.74400   3
   4   5   0 87.8994 3.19336   7
   4   5   0 87.8550 2.59915   2
   4   5   0 87.1581 2.98460   6
  -5  -5   0 184.541 5.25471   6
  -5  -5   0 177.742 5.56112   7
  -5  -5   0 180.222 5.34490   1
   5   5   0 178.832 5.47355   7
   5   5   0 180.601 4.78312   2
   5   5   0 179.314 5.42094   1
   5   5   0 185.513 4.73758   3
   5   5   0 181.272 4.72147   3
   5   5   0 177.294 5.15205   6
  -6  -5   0 2.57889 1.30344   7
  -6  -5   0 1.16118 1.03995   1
  -6  -5   0 2.06905 1.06330   6
   6   5   0 1.70457 1.19003   1
   6   5   0 0.86037 0.55149   3
   6   5   0 0.38888 0.53223   3
   6   5   0 0.26077 0.88616   6
   6   5   0 0.65567 1.12034   7
  -7  -5   0 90.6801 3.92637   7
  -7  -5   0 100.348 3.61140   6
  -7  -5   0 92.9904 3.67593   1
   7   5   0 96.3560 2.61353   3
   7   5   0 96.5294 3.81945   1
   7   5   0 95.5765 2.59386   3
   7   5   0 95.7926 3.45676   6
   7   5   0 94.4194 3.79521   7
  -8  -5   0 65.1461 3.35081   7
  -8  -5   0 61.3941 2.92228   6
   8   5   0 65.2781 2.84163   6
   8   5   0 63.5593 1.75356   3
   8   5   0 62.4977 1.75745   3
   8   5   0 67.3771 3.21147   1
  -9  -5   0 549.025 14.2855   6
  -9  -5   0 563.715 14.7897   7
   9   5   0 548.905 14.5364   1
   9   5   0 551.630 14.1307   6
  10   5   0 1.05278 1.32823   1
  11   5   0 129.252 4.57876   2
  11   5   0 127.091 5.27539   1
  12   5   0 9.93559 2.06512   1
  12   5   0 9.92189 1.66218   2
  13   5   0 1.66617 1.64590   1
  13   5   0 0.24482 1.33849   2
  14   5   0 0.27580 1.70451   1
  14   5   0 3.29681 1.59373   2
  14   5   0 1.63007 1.55157   4
  15   5   0 5.11791 1.79204   2
  15   5   0 3.74898 2.00377   1
  15   5   0 6.58992 1.96476   4
  16   5   0 7.05770 2.26267   1
  16   5   0 8.67721 1.99341   4
  16   5   0 3.91204 1.82983   2
  17   5   0 3.23819 2.39437   1
  17   5   0 4.30009 2.04851   4
  17   5   0 1.42102 1.73366   2
  18   5   0 -0.2419 2.06994   2
  18   5   0 -1.0313 1.83190   4
  18   5   0 2.78400 2.60275   1
  16  -6   0 11.8679 2.70282   2
  16  -6   0 5.81712 2.75056   4
 -16   6   0 13.8345 3.65250   5
  15  -6   0 18.1676 2.90926   2
  15  -6   0 15.1242 2.25964   4
 -15   6   0 19.6572 4.01912   5
  14  -6   0 23.0230 3.11081   2
  14  -6   0 19.8452 2.23839   3
  14  -6   0 19.7570 2.34824   4
 -14   6   0 16.7387 3.35516   5
  13  -6   0 25.1370 2.47858   4
  13  -6   0 29.6808 3.22574   2
  13  -6   0 26.2341 2.31859   3
 -13   6   0 25.8555 3.70164   5
  12  -6   0 -2.2943 1.25255   4
  12  -6   0 1.80370 1.26733   3
  12  -6   0 0.78564 1.73128   2
 -12   6   0 2.45089 2.18628   5
  11  -6   0 51.4074 3.63127   2
  11  -6   0 55.7952 2.90783   4
  11  -6   0 47.9780 2.78615   3
 -11   6   0 54.2481 4.51326   5
  10  -6   0 69.3333 3.17421   3
  10  -6   0 75.1918 3.99356   2
  10  -6   0 69.3879 3.17878   4
 -10   6   0 67.0322 4.23988   5
   9  -6   0 69.0818 3.27473   3
   9  -6   0 64.5210 3.00930   4
   9  -6   0 67.6842 3.67752   2
   9  -6   0 71.8987 3.05879   3
  -9   6   0 71.0813 4.27235   5
   8  -6   0 5.34584 1.30086   3
   8  -6   0 3.03296 1.31463   3
   8  -6   0 7.92712 1.30208   4
   8  -6   0 5.13441 1.58717   2
  -8   6   0 7.44634 1.85759   5
  -8   6   0 6.82728 1.42636   4
   7  -6   0 191.548 6.24874   2
   7  -6   0 189.405 5.72744   3
   7  -6   0 193.071 5.90194   3
   7  -6   0 184.818 5.69184   4
  -7   6   0 197.654 4.79924   3
  -7   6   0 179.592 6.48199   5
  -7   6   0 185.575 5.74866   4
  -7   6   0 191.256 4.76208   3
   6  -6   0 873.304 21.2195   4
   6  -6   0 888.480 21.9954   1
   6  -6   0 853.225 21.6607   2
   6  -6   0 871.700 21.2363   3
   6  -6   0 879.553 21.4324   3
  -6   6   0 886.095 20.6536   3
  -6   6   0 891.612 22.1264   5
  -6   6   0 894.985 20.7501   3
  -6   6   0 882.127 21.2739   4
   5  -6   0 77.7903 3.10324   3
   5  -6   0 76.8709 3.60114   1
   5  -6   0 73.5538 2.92511   4
   5  -6   0 72.4088 3.22055   3
   5  -6   0 72.7668 3.27098   2
  -5   6   0 74.7366 3.53227   5
  -5   6   0 79.1607 2.88810   3
  -5   6   0 78.5148 2.98893   4
  -5   6   0 78.1513 3.26308   2
  -5   6   0 73.0568 2.68198   3
   4  -6   0 2.96493 1.17985   2
   4  -6   0 4.21560 1.02838   4
   4  -6   0 3.00717 1.16982   3
   4  -6   0 4.24227 1.48317   1
   4  -6   0 3.37243 1.15630   3
  -4   6   0 4.44375 1.14761   4
  -4   6   0 4.83879 1.02270   3
  -4   6   0 3.69563 1.10848   3
  -4   6   0 3.76308 1.27320   2
   3  -6   0 582.100 14.3784   3
   3  -6   0 594.356 14.5237   3
   3  -6   0 567.120 14.4051   2
   3  -6   0 581.025 14.7416   1
   3  -6   0 566.257 14.2037   4
  -3   6   0 583.599 14.1844   3
  -3   6   0 593.364 14.4220   3
  -3   6   0 587.441 14.2313   4
  -3   6   0 563.581 14.7501   1
  -3   6   0 582.205 14.4768   2
   2  -6   0 128.358 3.98266   2
   2  -6   0 123.934 4.34672   1
   2  -6   0 127.201 3.94450   4
   2  -6   0 121.166 4.03437   3
   2  -6   0 125.524 4.16518   3
  -2   6   0 117.280 4.37562   1
  -2   6   0 131.508 3.92813   4
  -2   6   0 122.068 4.20723   3
  -2   6   0 128.269 4.07126   2
  -2   6   0 126.075 3.99942   3
   1  -6   0 505.550 12.6857   3
   1  -6   0 488.514 12.5075   3
   1  -6   0 489.826 12.3919   4
   1  -6   0 516.919 12.8147   1
   1  -6   0 499.070 12.3937   2
  -1   6   0 522.468 12.4691   2
  -1   6   0 505.455 12.8738   1
  -1   6   0 504.502 12.6791   3
  -1   6   0 495.490 12.4599   3
  -1   6   0 505.815 12.3941   4
   0  -6   0 248.423 6.48476   4
   0  -6   0 230.225 6.30089   2
   0  -6   0 240.197 6.71967   1
   0  -6   0 234.123 6.54388   3
   0  -6   0 239.588 6.37166   7
   0   6   0 239.605 6.54333   3
   0   6   0 242.411 6.74750   3
   0   6   0 241.352 6.79729   1
   0   6   0 233.476 6.42312   4
   0   6   0 247.004 6.38756   2
  -1  -6   0 177.596 4.76960   2
  -1  -6   0 177.143 5.31182   1
  -1  -6   0 179.752 5.06510   3
  -1  -6   0 170.250 5.09882   3
  -1  -6   0 177.860 5.01682   7
  -1  -6   0 173.538 5.04980   4
   1   6   0 174.671 5.00357   4
   1   6   0 170.810 5.00946   3
   1   6   0 164.462 5.31109   1
   1   6   0 182.182 4.82507   2
   1   6   0 171.540 5.17180   3
  -2  -6   0 0.41279 1.05355   1
  -2  -6   0 0.97063 0.98670   7
  -2  -6   0 2.17585 0.73139   2
  -2  -6   0 2.41204 0.95175   3
  -2  -6   0 1.10183 0.82685   3
   2   6   0 1.41347 0.85354   7
   2   6   0 1.78113 1.07238   3
   2   6   0 0.01545 0.81690   3
   2   6   0 1.15737 0.94524   1
   2   6   0 1.42010 0.90448   4
   2   6   0 1.23826 0.66062   2
  -3  -6   0 22.6296 1.81757   1
  -3  -6   0 24.5747 1.49962   3
  -3  -6   0 21.7733 1.33358   2
  -3  -6   0 21.6083 1.63227   6
  -3  -6   0 24.5194 1.51946   3
  -3  -6   0 20.7135 1.78684   7
   3   6   0 26.9162 1.64946   7
   3   6   0 24.1855 1.62889   3
   3   6   0 24.1187 1.71846   3
   3   6   0 21.4210 1.48599   4
   3   6   0 23.8650 1.91884   1
   3   6   0 23.7992 1.28299   2
  -4  -6   0 81.5287 3.24144   1
  -4  -6   0 81.5045 2.50228   3
  -4  -6   0 83.8972 3.26739   7
  -4  -6   0 83.6228 3.05750   6
  -4  -6   0 82.1890 2.48738   3
   4   6   0 80.0638 2.78881   3
   4   6   0 78.2365 3.32356   1
   4   6   0 79.8438 3.04587   4
   4   6   0 82.9033 2.60214   2
   4   6   0 82.8149 2.90757   3
   4   6   0 78.9297 3.14748   7
  -5  -6   0 5.10742 1.42794   7
  -5  -6   0 6.23412 1.27677   6
  -5  -6   0 5.37929 0.45165   3
  -5  -6   0 4.52272 1.24033   1
  -5  -6   0 5.76099 0.44282   3
   5   6   0 7.12690 1.03154   3
   5   6   0 7.16830 1.15628   6
   5   6   0 6.35128 1.37746   7
   5   6   0 5.77395 1.20447   1
   5   6   0 4.52728 0.89507   3
   5   6   0 5.08362 0.80360   2
  -6  -6   0 40.1023 2.63649   7
  -6  -6   0 38.6533 2.38977   1
  -6  -6   0 38.8697 2.38646   6
   6   6   0 42.3812 1.78997   2
   6   6   0 38.9953 2.54065   1
   6   6   0 42.4874 2.46880   7
   6   6   0 37.8180 2.09006   6
   6   6   0 37.4263 1.77804   3
   6   6   0 39.5490 1.76207   3
  -7  -6   0 175.001 5.93691   7
  -7  -6   0 168.999 5.43145   6
  -7  -6   0 184.813 5.73253   1
   7   6   0 182.342 5.82417   7
   7   6   0 174.057 4.73382   3
   7   6   0 179.745 4.74276   3
   7   6   0 169.964 5.75340   1
   7   6   0 182.098 5.42168   6
  -8  -6   0 1.26950 1.40813   7
  -8  -6   0 0.81590 1.16160   6
   8   6   0 0.74043 0.56759   3
   8   6   0 0.03902 1.26064   1
   8   6   0 1.27244 0.59723   3
   8   6   0 2.19899 1.07426   6
  -9  -6   0 49.9661 2.81638   6
  -9  -6   0 48.8703 3.22786   7
   9   6   0 52.3311 1.77009   3
   9   6   0 51.0158 1.75620   3
   9   6   0 47.9254 3.05820   1
 -10  -6   0 221.651 7.17926   6
 -10  -6   0 238.833 7.79435   7
  10   6   0 232.701 5.77150   3
  10   6   0 236.907 5.79935   3
  10   6   0 241.274 7.62389   1
  11   6   0 44.1997 3.40594   1
  11   6   0 42.9637 1.46012   3
  11   6   0 39.9978 1.42637   3
  12   6   0 97.0115 2.61940   3
  12   6   0 96.2043 2.58806   3
  12   6   0 96.1318 3.97773   2
  12   6   0 97.4510 4.67517   1
  13   6   0 32.4415 2.55886   2
  13   6   0 28.4912 3.00679   1
  13   6   0 29.7720 1.12215   3
  14   6   0 9.30918 2.27316   1
  14   6   0 3.65068 1.53431   2
  15   6   0 2.41219 1.79147   4
  15   6   0 3.07014 1.63213   2
  15   6   0 5.44065 2.14173   1
  16   6   0 -0.7679 1.53893   4
  16   6   0 -2.8126 1.40169   2
  16   6   0 0.02505 2.04591   1
  17   6   0 3.12267 1.77021   4
  17   6   0 0.20773 2.07783   1
  17   6   0 0.34772 1.65376   2
  18   6   0 5.85390 2.80455   1
  18   6   0 1.87432 2.10078   4
  16  -7   0 3.16193 2.58567   2
 -16   7   0 2.76380 2.83874   5
  15  -7   0 3.98653 1.82720   4
  15  -7   0 5.26565 2.61960   2
 -15   7   0 7.54998 3.08692   5
  14  -7   0 4.36405 1.67418   3
  14  -7   0 3.40260 2.11495   2
  14  -7   0 4.40802 1.68307   4
 -14   7   0 11.3621 3.05013   5
  13  -7   0 33.5877 2.84881   4
  13  -7   0 29.7990 3.30860   2
  13  -7   0 32.5123 2.77666   3
 -13   7   0 32.7639 4.03428   5
  12  -7   0 35.1882 3.40009   2
  12  -7   0 37.9186 2.86269   4
  12  -7   0 37.1118 2.82039   3
 -12   7   0 34.5905 3.89336   5
  11  -7   0 2.44869 1.37878   3
  11  -7   0 2.48294 1.88593   2
  11  -7   0 3.17885 1.47476   4
 -11   7   0 1.37105 2.08019   5
  10  -7   0 1.70809 1.18194   4
  10  -7   0 -1.3964 1.56963   2
  10  -7   0 2.65633 1.38764   3
 -10   7   0 2.26941 1.93752   5
   9  -7   0 1.15335 1.48638   2
   9  -7   0 1.17679 1.18501   3
   9  -7   0 1.42502 1.26138   4
  -9   7   0 0.37549 1.94766   5
   8  -7   0 15.4647 1.79579   3
   8  -7   0 18.5872 1.93129   4
   8  -7   0 20.8104 2.27835   2
  -8   7   0 15.8607 2.51368   5
   7  -7   0 11.8531 1.83328   2
   7  -7   0 13.2508 1.67375   3
   7  -7   0 12.6174 1.55722   4
  -7   7   0 14.0243 1.19050   3
  -7   7   0 11.1041 1.04185   3
  -7   7   0 11.7027 1.65757   4
  -7   7   0 13.7386 2.28910   5
   6  -7   0 15.1329 1.89119   2
   6  -7   0 13.1969 1.65766   3
   6  -7   0 14.9306 1.89952   3
   6  -7   0 15.9806 1.59423   4
  -6   7   0 13.9326 2.09478   5
  -6   7   0 14.7334 1.26425   3
  -6   7   0 13.8534 1.58513   4
  -6   7   0 15.0585 1.45067   3
   5  -7   0 46.6601 2.97177   1
   5  -7   0 49.3755 2.73586   2
   5  -7   0 44.6305 2.34232   4
   5  -7   0 44.3393 2.45541   3
   5  -7   0 47.3184 2.77622   3
  -5   7   0 42.8364 2.30777   4
  -5   7   0 48.2221 2.45587   3
  -5   7   0 45.7241 2.21043   3
  -5   7   0 41.3582 2.80682   5
   4  -7   0 364.382 10.0535   2
   4  -7   0 382.768 10.1793   3
   4  -7   0 367.992 9.79029   4
   4  -7   0 394.301 10.5237   1
   4  -7   0 376.276 9.99006   3
  -4   7   0 378.452 9.80568   4
  -4   7   0 372.339 10.4981   1
  -4   7   0 369.004 10.1208   2
  -4   7   0 375.238 9.68401   3
  -4   7   0 368.463 9.89683   3
   3  -7   0 260.068 7.47446   2
   3  -7   0 274.079 7.89878   1
   3  -7   0 260.127 7.58222   3
   3  -7   0 260.841 7.44238   3
   3  -7   0 264.900 7.29684   4
  -3   7   0 279.409 7.60148   2
  -3   7   0 266.850 7.28093   3
  -3   7   0 263.730 7.90318   1
  -3   7   0 263.459 7.52496   3
  -3   7   0 266.545 7.27687   4
   2  -7   0 80.0090 3.43113   3
   2  -7   0 89.6697 3.73233   1
   2  -7   0 91.1419 3.54375   3
   2  -7   0 85.7911 3.23836   4
   2  -7   0 92.5213 3.37298   2
  -2   7   0 91.6176 3.88048   1
  -2   7   0 87.8522 3.34793   3
  -2   7   0 86.8020 3.19512   4
  -2   7   0 94.2230 3.41111   2
  -2   7   0 87.5775 3.62818   3
   1  -7   0 226.341 6.60758   3
   1  -7   0 213.149 6.39014   3
   1  -7   0 227.973 6.74868   1
   1  -7   0 221.008 6.32469   4
   1  -7   0 220.878 6.25824   2
  -1   7   0 230.006 6.61417   3
  -1   7   0 225.883 6.28547   2
  -1   7   0 229.184 6.26745   4
  -1   7   0 231.486 6.39956   3
  -1   7   0 225.455 6.83243   1
   0  -7   0 61.3873 2.66286   4
   0  -7   0 64.3716 2.55068   7
   0  -7   0 64.4221 3.02548   1
   0  -7   0 59.2450 2.43642   2
   0  -7   0 65.3422 2.84223   3
   0  -7   0 61.4874 2.68249   3
   0   7   0 60.4398 2.49926   2
   0   7   0 57.9184 3.06703   1
   0   7   0 64.9487 2.60628   4
   0   7   0 64.7943 3.04621   3
   0   7   0 61.4689 2.65284   3
  -1  -7   0 238.080 6.22433   2
  -1  -7   0 241.872 6.64925   3
  -1  -7   0 236.658 6.82792   1
  -1  -7   0 231.594 6.46549   7
  -1  -7   0 230.071 6.52151   4
  -1  -7   0 232.954 6.47349   3
   1   7   0 233.763 6.47207   4
   1   7   0 239.946 6.30937   2
   1   7   0 227.283 6.50699   3
   1   7   0 215.873 6.60031   3
   1   7   0 230.685 6.90731   1
  -2  -7   0 13.3930 1.55647   7
  -2  -7   0 12.9524 1.41668   3
  -2  -7   0 11.9191 1.63291   1
  -2  -7   0 14.3488 1.17993   2
  -2  -7   0 13.3164 1.46338   3
   2   7   0 12.7710 1.22956   2
   2   7   0 11.8514 1.73617   1
   2   7   0 13.3226 1.54688   3
   2   7   0 13.5384 1.49302   3
   2   7   0 11.9916 1.38052   4
  -3  -7   0 10.1566 1.48996   7
  -3  -7   0 9.44687 1.16611   3
  -3  -7   0 12.5229 1.59040   1
  -3  -7   0 12.1107 1.25452   3
  -3  -7   0 9.98180 1.06553   2
   3   7   0 11.7716 1.67939   1
   3   7   0 13.1842 1.39613   3
   3   7   0 9.44538 1.20574   4
   3   7   0 10.1942 1.46919   3
   3   7   0 11.7937 1.43378   7
   3   7   0 9.21384 0.98025   2
  -4  -7   0 417.425 10.5990   2
  -4  -7   0 441.867 10.6008   3
  -4  -7   0 420.769 11.3779   7
  -4  -7   0 415.424 11.2509   1
  -4  -7   0 432.209 11.1035   6
  -4  -7   0 449.228 10.5998   3
   4   7   0 437.017 11.0431   3
   4   7   0 431.725 10.9084   3
   4   7   0 426.491 11.4384   1
   4   7   0 421.322 10.5510   2
   4   7   0 445.990 11.2770   7
   4   7   0 448.734 11.1835   4
  -5  -7   0 162.091 4.95559   6
  -5  -7   0 161.741 3.97534   3
  -5  -7   0 143.587 5.10014   7
  -5  -7   0 143.658 3.93393   3
  -5  -7   0 148.133 5.00092   1
   5   7   0 153.091 4.83981   4
   5   7   0 143.639 4.45364   3
   5   7   0 155.285 4.27497   2
   5   7   0 143.092 4.57901   3
   5   7   0 147.286 5.14682   1
   5   7   0 138.232 4.88722   7
  -6  -7   0 3.67117 1.43661   7
  -6  -7   0 3.97804 1.14656   1
  -6  -7   0 4.48994 1.31846   6
   6   7   0 2.37157 1.38973   1
   6   7   0 3.76112 1.32825   7
   6   7   0 5.82325 0.92613   2
   6   7   0 3.25812 0.89309   3
   6   7   0 3.72796 1.00678   3
  -7  -7   0 109.661 4.54019   7
  -7  -7   0 101.597 4.01005   6
   7   7   0 111.099 3.49019   3
   7   7   0 114.199 4.49738   1
   7   7   0 115.882 3.99001   6
   7   7   0 114.057 3.59197   3
   7   7   0 113.084 3.47246   2
  -8  -7   0 9.79950 1.61832   6
  -8  -7   0 6.71927 1.80522   7
   8   7   0 11.4933 1.56060   6
   8   7   0 9.52407 1.07128   3
   8   7   0 7.38110 1.03682   3
   8   7   0 8.73422 1.80918   1
   8   7   0 6.65472 1.01316   2
  -9  -7   0 17.3426 2.03146   6
  -9  -7   0 16.8536 2.36412   7
   9   7   0 17.3504 1.28898   3
   9   7   0 16.9211 2.16108   1
   9   7   0 18.6947 1.31882   3
 -10  -7   0 16.4042 2.19619   6
 -10  -7   0 15.5504 2.41427   7
  10   7   0 18.5863 1.31009   3
  10   7   0 13.3274 2.14730   1
  10   7   0 18.6941 1.30165   3
 -11  -7   0 15.5135 2.26314   6
 -11  -7   0 14.5033 2.49671   7
  11   7   0 11.9693 1.06778   3
  11   7   0 11.4306 2.14105   1
  11   7   0 12.0914 1.06760   3
  12   7   0 13.3115 1.08308   3
  12   7   0 11.3779 1.06048   3
  12   7   0 14.7583 2.42159   1
  13   7   0 69.9839 4.33802   1
  13   7   0 76.2369 3.60977   2
  13   7   0 71.9488 2.40282   3
  14   7   0 43.5220 3.05087   2
  14   7   0 46.4334 3.92620   1
  15   7   0 73.1644 5.01941   1
  15   7   0 71.1911 3.83891   2
  16   7   0 41.0928 3.90871   1
  16   7   0 36.9959 3.11290   2
  16   7   0 39.8554 3.53657   4
  17   7   0 25.6540 3.45767   1
  17   7   0 28.9605 3.24648   4
  18   7   0 17.8666 2.85708   4
  18   7   0 13.6676 3.24229   1
  15  -8   0 2.24449 2.11918   2
  15  -8   0 1.85878 1.71169   4
 -15   8   0 5.32304 3.22952   5
  14  -8   0 7.91823 1.89192   4
  14  -8   0 4.96523 2.26954   2
  14  -8   0 8.12035 2.02209   3
 -14   8   0 9.41521 3.24419   5
  13  -8   0 3.43052 1.73550   3
  13  -8   0 2.93113 2.12324   2
  13  -8   0 3.34576 1.48712   4
 -13   8   0 5.09841 2.82656   5
  12  -8   0 6.48478 1.85674   3
  12  -8   0 6.32429 1.73800   4
  12  -8   0 2.48838 1.92290   2
 -12   8   0 4.58264 2.33585   5
  11  -8   0 94.6367 4.21142   3
  11  -8   0 86.1421 4.73787   2
  11  -8   0 86.5264 3.91202   4
 -11   8   0 87.8594 5.16172   5
  10  -8   0 2.35314 1.35669   4
  10  -8   0 -0.9012 1.64273   2
  10  -8   0 5.01444 1.63646   3
 -10   8   0 1.34568 1.85953   5
   9  -8   0 28.6807 2.89116   2
   9  -8   0 30.8836 2.51639   4
   9  -8   0 35.4046 2.74288   3
  -9   8   0 27.0813 3.15463   5
   8  -8   0 23.8676 2.11445   4
   8  -8   0 24.6427 2.45321   2
   8  -8   0 26.0920 2.28625   3
  -8   8   0 25.1084 2.82971   5
  -8   8   0 24.7651 1.39817   3
  -8   8   0 27.0083 1.44431   3
   7  -8   0 3.95910 1.38567   3
   7  -8   0 3.38090 1.51002   2
   7  -8   0 5.31229 1.29516   4
  -7   8   0 4.29976 0.92465   3
  -7   8   0 3.82069 1.66705   5
  -7   8   0 5.38974 1.07361   3
   6  -8   0 17.3292 2.05752   2
   6  -8   0 15.6370 1.71006   4
   6  -8   0 16.9268 1.98026   3
  -6   8   0 15.8035 1.66064   3
  -6   8   0 18.6980 1.56720   3
  -6   8   0 15.3187 2.20359   5
   5  -8   0 2.00048 1.20245   4
   5  -8   0 1.69025 1.32328   3
   5  -8   0 0.56043 1.26826   2
  -5   8   0 1.63609 1.02040   3
  -5   8   0 -0.0761 1.36154   5
  -5   8   0 1.50482 1.05463   4
  -5   8   0 2.54190 1.19334   3
   4  -8   0 1.52543 1.23099   3
   4  -8   0 5.84479 1.26885   4
   4  -8   0 2.21601 1.23635   2
  -4   8   0 2.20216 1.08069   3
  -4   8   0 5.09186 1.21571   4
  -4   8   0 4.70553 1.36035   3
  -4   8   0 2.66617 1.61873   1
   3  -8   0 108.545 3.86410   4
   3  -8   0 106.072 4.36541   1
   3  -8   0 99.8997 3.89169   2
   3  -8   0 108.771 4.11547   3
   3  -8   0 107.027 4.11737   3
  -3   8   0 95.9167 4.37295   1
  -3   8   0 104.143 3.74137   4
  -3   8   0 103.944 3.98144   2
  -3   8   0 112.990 3.81514   3
  -3   8   0 103.579 4.11883   3
   2  -8   0 7.94053 1.48965   3
   2  -8   0 6.71648 1.34007   4
   2  -8   0 5.88213 1.69652   1
   2  -8   0 9.25683 1.72576   3
   2  -8   0 8.88822 1.42453   2
  -2   8   0 7.53175 1.59081   1
  -2   8   0 8.16332 1.70323   3
  -2   8   0 8.56905 1.42087   2
  -2   8   0 8.13269 1.38565   3
  -2   8   0 8.99300 1.34974   4
   1  -8   0 216.723 6.38304   3
   1  -8   0 212.744 6.21783   4
   1  -8   0 197.919 6.03323   2
   1  -8   0 214.040 6.62809   1
  -1   8   0 194.377 6.47792   3
  -1   8   0 216.362 6.24676   3
  -1   8   0 221.965 6.76639   1
  -1   8   0 212.952 6.18241   2
  -1   8   0 216.318 6.16572   4
   0  -8   0 114.770 4.06346   4
   0  -8   0 120.006 4.24031   3
   0  -8   0 125.781 4.19256   3
   0  -8   0 116.894 3.92639   7
   0  -8   0 120.788 3.89300   2
   0  -8   0 113.772 4.25557   1
   0   8   0 108.064 4.23767   3
   0   8   0 113.698 4.37111   1
   0   8   0 121.648 3.94137   2
   0   8   0 120.230 4.09598   3
   0   8   0 110.783 3.94692   4
  -1  -8   0 640.407 15.5339   1
  -1  -8   0 589.398 15.0316   3
  -1  -8   0 577.712 15.0802   4
  -1  -8   0 604.939 14.7696   2
  -1  -8   0 615.976 15.1734   3
  -1  -8   0 604.740 15.0828   7
   1   8   0 633.308 14.9136   2
   1   8   0 600.407 15.0556   4
   1   8   0 568.439 15.2653   3
   1   8   0 605.857 15.5129   1
   1   8   0 621.448 15.1301   3
  -2  -8   0 38.5209 2.61264   1
  -2  -8   0 38.2737 1.89427   2
  -2  -8   0 38.0116 2.20200   3
  -2  -8   0 38.5045 2.34498   7
  -2  -8   0 34.5909 2.22168   3
   2   8   0 36.0813 2.21691   4
   2   8   0 39.9745 2.77067   1
   2   8   0 35.1460 2.29264   3
   2   8   0 36.8249 2.43182   3
   2   8   0 37.7322 1.91297   2
  -3  -8   0 89.7060 3.35750   3
  -3  -8   0 92.5002 3.30594   3
  -3  -8   0 93.1061 3.83992   1
  -3  -8   0 90.5870 3.69862   7
  -3  -8   0 93.3482 3.07791   2
   3   8   0 97.1673 4.08002   1
   3   8   0 98.6553 3.13972   2
   3   8   0 94.6783 3.54018   3
   3   8   0 95.3459 3.46563   4
   3   8   0 99.3255 3.60934   7
   3   8   0 84.7920 3.63985   3
  -4  -8   0 246.714 7.10882   7
  -4  -8   0 228.413 6.75682   6
  -4  -8   0 238.302 6.30569   3
  -4  -8   0 228.013 6.91115   1
  -4  -8   0 229.073 6.20567   2
  -4  -8   0 230.981 6.24368   3
   4   8   0 231.725 6.20801   2
   4   8   0 231.347 7.13297   1
   4   8   0 231.727 6.58709   3
   4   8   0 225.566 6.72603   3
   4   8   0 237.645 6.77567   4
   4   8   0 222.816 6.78870   7
  -5  -8   0 32.2061 2.61533   7
  -5  -8   0 32.6988 1.62648   3
  -5  -8   0 33.9362 2.43878   1
  -5  -8   0 29.6154 2.19887   6
  -5  -8   0 34.7305 1.63985   3
   5   8   0 36.6018 2.09680   3
   5   8   0 30.7880 2.20494   4
   5   8   0 35.7716 2.27890   3
   5   8   0 34.7363 1.74648   2
   5   8   0 30.1880 2.27408   7
   5   8   0 36.7830 2.73563   1
  -6  -8   0 18.6772 2.01174   7
  -6  -8   0 15.4509 0.87442   3
  -6  -8   0 15.1980 0.88760   3
  -6  -8   0 14.7392 1.81794   6
   6   8   0 17.4027 1.67333   3
   6   8   0 13.9909 1.22484   2
   6   8   0 18.4066 1.61561   3
   6   8   0 16.0447 2.09438   1
  -7  -8   0 23.8845 2.44606   7
  -7  -8   0 22.1448 2.07714   6
   7   8   0 25.8903 2.43545   1
   7   8   0 24.6516 1.85856   3
   7   8   0 18.1698 1.39901   2
   7   8   0 19.8566 1.60003   3
  -8  -8   0 3.30817 1.70281   7
  -8  -8   0 4.24449 1.57348   6
   8   8   0 4.53769 0.99732   3
   8   8   0 2.41074 0.84898   2
   8   8   0 3.17794 1.07267   3
   8   8   0 4.46038 1.65684   1
  -9  -8   0 5.43536 1.84399   7
  -9  -8   0 3.37248 1.40546   6
   9   8   0 6.36004 1.13882   3
   9   8   0 4.49437 0.99599   3
   9   8   0 4.54416 0.99632   2
   9   8   0 5.36615 1.78154   1
 -10  -8   0 48.8760 3.03737   6
 -10  -8   0 50.6563 3.66032   7
  10   8   0 43.9462 3.37493   1
  10   8   0 50.4343 2.27814   3
  10   8   0 49.3953 2.33663   2
  10   8   0 49.5855 2.21500   3
 -11  -8   0 97.3704 4.52946   6
 -11  -8   0 103.376 5.05146   7
  11   8   0 96.1805 3.29814   3
  11   8   0 97.6446 4.80363   1
  11   8   0 99.2306 3.34541   3
 -12  -8   0 1.47648 1.58842   6
 -12  -8   0 1.46968 2.01930   7
  12   8   0 3.40710 1.96798   1
  12   8   0 4.24164 0.96654   3
  12   8   0 1.55816 0.91275   3
  13   8   0 0.98239 1.87320   1
  13   8   0 0.57616 0.89182   3
  14   8   0 13.1273 1.99883   2
  14   8   0 16.3293 2.80039   1
  15   8   0 8.90209 2.59149   1
  15   8   0 7.67042 1.77317   2
  16   8   0 -0.8698 1.60535   2
  16   8   0 0.25415 2.17552   1
  17   8   0 2.59051 2.44003   1
  17   8   0 -1.9586 1.78306   4
  15  -9   0 -0.8490 2.02631   2
 -15   9   0 1.40859 3.06724   5
  14  -9   0 49.1834 3.51796   4
  14  -9   0 51.5654 4.43335   2
  14  -9   0 47.5759 3.70723   3
 -14   9   0 52.0910 5.31959   5
  13  -9   0 70.5890 3.92418   4
  13  -9   0 62.7340 4.52368   2
  13  -9   0 64.7087 3.92495   3
 -13   9   0 70.4074 5.22999   5
  12  -9   0 1.08108 1.73558   3
  12  -9   0 2.25466 1.89382   2
  12  -9   0 1.91012 1.60616   4
 -12   9   0 1.11564 2.20936   5
  11  -9   0 36.9362 3.05346   3
  11  -9   0 28.8937 3.15879   2
  11  -9   0 31.3721 2.73118   4
 -11   9   0 32.9762 3.71225   5
  10  -9   0 92.9505 4.33084   3
  10  -9   0 91.3005 4.05210   4
  10  -9   0 93.5682 4.77866   2
 -10   9   0 81.5293 4.95014   5
   9  -9   0 14.3794 2.14561   3
   9  -9   0 15.9172 2.10248   4
   9  -9   0 16.4972 2.40977   2
  -9   9   0 12.6872 2.57700   5
  -9   9   0 14.5516 1.01929   3
  -9   9   0 13.9272 0.93277   3
   8  -9   0 6.04562 1.65032   4
   8  -9   0 1.78362 1.62251   2
   8  -9   0 7.15855 1.76487   3
  -8   9   0 6.01960 1.99881   5
  -8   9   0 5.68511 0.99832   3
  -8   9   0 6.26841 1.06201   3
   7  -9   0 20.3374 2.29932   3
   7  -9   0 18.8190 2.35151   2
   7  -9   0 18.3216 1.97943   4
  -7   9   0 20.7558 2.62051   5
  -7   9   0 17.4011 1.54951   3
  -7   9   0 19.9162 1.80118   3
   6  -9   0 3.14708 1.52621   2
   6  -9   0 1.19348 1.35593   3
   6  -9   0 2.29149 1.18677   4
  -6   9   0 3.01438 1.27680   3
  -6   9   0 3.01147 1.06637   3
  -6   9   0 1.41559 1.52949   5
   5  -9   0 4.72095 1.50275   2
   5  -9   0 2.75087 1.48162   3
   5  -9   0 7.29371 1.40929   4
  -5   9   0 6.28624 1.32409   3
  -5   9   0 5.36867 1.46209   3
   4  -9   0 107.779 4.37609   3
   4  -9   0 109.714 4.11543   4
   4  -9   0 122.826 4.45828   2
  -4   9   0 110.372 4.32429   3
  -4   9   0 110.341 4.05398   3
  -4   9   0 102.748 4.70610   1
   3  -9   0 15.1831 1.86450   3
   3  -9   0 15.6684 1.74327   4
   3  -9   0 11.4493 1.63885   2
  -3   9   0 10.6478 1.72804   3
  -3   9   0 12.8455 1.59232   3
  -3   9   0 16.1499 1.72012   4
  -3   9   0 11.8921 2.08387   1
   2  -9   0 311.748 9.08007   3
   2  -9   0 332.114 9.03637   4
   2  -9   0 319.751 8.95392   2
  -2   9   0 326.465 8.91552   4
  -2   9   0 325.688 9.66630   1
  -2   9   0 338.162 9.41883   3
  -2   9   0 318.152 8.99933   3
  -2   9   0 343.582 9.19629   2
   1  -9   0 516.053 13.3800   4
   1  -9   0 498.965 13.4225   3
   1  -9   0 513.826 13.2160   2
   1  -9   0 540.126 14.0114   1
   1  -9   0 526.827 14.3268   3
  -1   9   0 509.791 13.7088   3
  -1   9   0 514.264 13.9933   1
  -1   9   0 541.287 13.3852   2
  -1   9   0 519.771 13.3062   4
  -1   9   0 528.885 13.4308   3
   0  -9   0 225.478 6.69798   4
   0  -9   0 232.611 6.93468   3
   0  -9   0 220.553 6.74943   3
   0  -9   0 231.438 7.15093   1
   0  -9   0 222.139 6.41584   2
   0  -9   0 227.057 6.54435   7
   0   9   0 211.905 6.64449   3
   0   9   0 220.579 7.20282   1
   0   9   0 228.253 6.97801   3
   0   9   0 231.910 6.53772   2
   0   9   0 221.557 6.58664   4
  -1  -9   0 1.73772 1.12488   7
  -1  -9   0 0.25308 1.17040   3
  -1  -9   0 -1.7376 1.27136   1
  -1  -9   0 -0.7225 1.10308   3
  -1  -9   0 1.20910 1.19253   4
  -1  -9   0 1.81938 0.97592   2
   1   9   0 1.57410 1.21381   3
   1   9   0 -0.4558 0.89573   2
   1   9   0 -1.4468 1.49784   1
   1   9   0 1.56924 0.90999   4
   1   9   0 0.36139 1.43985   3
  -2  -9   0 74.2666 3.40613   7
  -2  -9   0 81.8481 3.35864   3
  -2  -9   0 86.9968 3.40105   3
  -2  -9   0 79.8684 2.98569   2
  -2  -9   0 82.0869 3.55461   1
   2   9   0 84.9580 3.75347   3
   2   9   0 80.9825 3.44264   3
   2   9   0 83.2846 3.92248   1
   2   9   0 76.1556 3.29245   4
   2   9   0 88.1702 3.11285   2
  -3  -9   0 570.591 14.8732   7
  -3  -9   0 585.627 14.1825   2
  -3  -9   0 600.003 14.5200   3
  -3  -9   0 551.832 14.3613   3
  -3  -9   0 570.716 15.0447   1
   3   9   0 564.932 15.1510   1
   3   9   0 593.210 14.9142   3
   3   9   0 574.187 14.7485   4
   3   9   0 583.043 14.6672   3
   3   9   0 595.305 14.2504   2
  -4  -9   0 132.520 4.67020   6
  -4  -9   0 135.643 4.28094   3
  -4  -9   0 133.731 4.29185   3
  -4  -9   0 140.119 5.02347   7
  -4  -9   0 137.904 4.20480   2
   4   9   0 138.249 4.21349   2
   4   9   0 143.855 4.67718   3
   4   9   0 128.998 5.15118   7
   4   9   0 132.502 5.13105   1
   4   9   0 141.025 4.86134   3
  -5  -9   0 479.348 12.6904   6
  -5  -9   0 486.054 13.0684   7
  -5  -9   0 485.259 11.9632   3
  -5  -9   0 499.927 11.9837   3
   5   9   0 474.367 13.1541   1
   5   9   0 483.680 12.0504   2
   5   9   0 502.656 12.5278   3
   5   9   0 478.778 12.6555   3
  -6  -9   0 1.00796 0.61929   3
  -6  -9   0 2.84109 1.27625   6
  -6  -9   0 1.19267 1.45377   7
  -6  -9   0 1.12968 0.60728   3
   6   9   0 1.43198 1.55079   1
   6   9   0 0.08140 1.12447   3
   6   9   0 0.71408 0.79628   2
   6   9   0 -0.0595 0.97016   3
  -7  -9   0 183.233 6.08132   6
  -7  -9   0 195.945 6.62052   7
   7   9   0 185.712 5.79092   3
   7   9   0 193.834 5.72735   3
   7   9   0 188.397 6.58925   1
   7   9   0 188.591 5.35507   2
  -8  -9   0 32.5556 2.62920   6
  -8  -9   0 28.9446 2.86523   7
   8   9   0 34.5011 2.09590   3
   8   9   0 32.0062 2.86322   1
   8   9   0 26.4142 2.07072   3
   8   9   0 29.2221 1.76288   2
  -9  -9   0 25.5105 2.43368   6
  -9  -9   0 24.8804 2.80433   7
   9   9   0 28.8382 2.72164   1
   9   9   0 31.1920 2.12982   3
   9   9   0 29.8283 1.98235   3
   9   9   0 26.5473 1.75511   2
 -10  -9   0 321.957 9.61900   6
 -10  -9   0 315.543 10.1976   7
  10   9   0 328.476 8.58544   2
  10   9   0 333.932 10.1422   1
  10   9   0 319.956 8.64163   3
  10   9   0 322.249 8.71404   3
 -11  -9   0 52.2151 3.97218   7
 -11  -9   0 50.9132 3.30727   6
  11   9   0 54.2974 3.88510   1
  11   9   0 50.3546 2.47310   3
  11   9   0 50.8976 2.49864   2
  11   9   0 48.5904 2.56330   3
 -12  -9   0 3.31021 1.89246   6
 -12  -9   0 4.14297 2.22606   7
  12   9   0 2.32095 2.00706   1
  12   9   0 3.24158 1.07538   3
  12   9   0 0.79962 1.07250   3
 -13  -9   0 13.0593 2.31885   6
  13   9   0 13.2715 2.65507   1
  13   9   0 11.0656 1.50799   3
  14   9   0 71.1523 4.84954   1
  15   9   0 52.9220 3.27336   2
  15   9   0 50.4230 4.48749   1
  16   9   0 2.90662 2.34847   1
  17   9   0 6.29050 2.67617   1
  14 -10   0 1.48941 1.79148   4
  14 -10   0 -2.6767 1.78022   3
  14 -10   0 -1.9001 2.07089   2
 -14  10   0 -0.5791 2.56902   5
  13 -10   0 -0.6991 2.02438   2
  13 -10   0 3.66806 2.06469   3
  13 -10   0 4.87872 1.90128   4
 -13  10   0 6.13442 2.88664   5
  12 -10   0 -1.8568 1.90441   2
  12 -10   0 1.72991 1.67812   4
  12 -10   0 4.89990 1.98240   3
 -12  10   0 3.49922 2.38353   5
  11 -10   0 12.8540 2.61613   2
  11 -10   0 13.6972 2.37184   3
  11 -10   0 13.7559 2.12114   4
 -11  10   0 15.9005 2.87827   5
  10 -10   0 103.400 4.49407   4
  10 -10   0 106.670 4.89486   3
  10 -10   0 112.030 5.32068   2
 -10  10   0 97.4194 5.72591   5
   9 -10   0 98.2701 4.89352   2
   9 -10   0 87.8872 4.51229   3
   9 -10   0 97.2609 4.40156   4
  -9  10   0 91.0302 5.32594   5
  -9  10   0 100.673 3.14002   3
   8 -10   0 0.87598 1.65905   3
   8 -10   0 0.81909 1.33507   4
   8 -10   0 4.82450 1.87356   2
  -8  10   0 2.47151 1.11814   3
  -8  10   0 -1.6521 1.68314   5
  -8  10   0 1.94734 0.98734   3
   7 -10   0 9.90889 1.88677   4
   7 -10   0 8.09523 1.98155   3
   7 -10   0 11.1862 2.12661   2
  -7  10   0 13.5580 1.61550   3
  -7  10   0 10.8324 1.61972   3
  -7  10   0 11.4241 2.44191   5
   6 -10   0 142.786 5.47398   2
   6 -10   0 144.874 5.10895   4
   6 -10   0 142.378 5.34845   3
  -6  10   0 140.354 5.02969   3
  -6  10   0 141.341 4.78249   3
  -6  10   0 138.518 5.75934   5
   5 -10   0 30.0892 2.65116   3
   5 -10   0 27.3462 2.36074   4
   5 -10   0 30.2868 2.65217   2
  -5  10   0 25.0764 2.84362   1
  -5  10   0 27.0870 2.39063   3
  -5  10   0 31.4964 2.26064   3
   4 -10   0 2.50834 1.38798   2
   4 -10   0 2.90649 1.43832   3
   4 -10   0 2.60449 1.28273   4
  -4  10   0 5.22273 1.57531   3
  -4  10   0 1.40186 1.67288   1
   3 -10   0 31.0493 2.35964   4
   3 -10   0 38.0638 2.67856   3
   3 -10   0 32.1035 2.44870   2
  -3  10   0 32.4327 2.98749   1
  -3  10   0 32.2573 2.65690   3
   2 -10   0 9.77550 1.69086   3
   2 -10   0 8.69684 1.53329   2
   2 -10   0 9.05673 1.56355   4
  -2  10   0 8.38741 1.78416   3
  -2  10   0 8.21392 1.92989   1
   1 -10   0 51.7533 2.95317   3
   1 -10   0 53.8899 2.75182   2
   1 -10   0 54.4929 2.77068   7
   1 -10   0 50.0051 2.79446   4
  -1  10   0 54.7974 3.15612   3
  -1  10   0 49.1954 3.46770   1
   0 -10   0 78.1185 3.25815   2
   0 -10   0 78.1896 3.45612   7
   0 -10   0 83.2943 3.73091   3
   0 -10   0 86.0880 3.61185   4
   0  10   0 87.0885 4.00163   1
   0  10   0 81.9117 3.38007   2
   0  10   0 83.3161 3.95863   3
  -1 -10   0 76.0326 3.47067   3
  -1 -10   0 74.2107 3.39502   7
  -1 -10   0 71.8697 2.97268   2
  -1 -10   0 72.2623 3.39577   4
   1  10   0 70.1214 3.57958   3
   1  10   0 74.4646 3.09734   2
   1  10   0 76.5276 3.92540   1
  -2 -10   0 38.5010 2.12991   2
  -2 -10   0 36.4604 2.53577   3
  -2 -10   0 45.3260 2.66757   7
  -2 -10   0 35.5009 2.53387   3
   2  10   0 36.3952 2.84265   3
   2  10   0 33.4065 2.88061   1
   2  10   0 40.4217 2.19431   2
  -3 -10   0 141.958 4.81430   3
  -3 -10   0 140.349 5.18218   7
  -3 -10   0 148.113 4.59603   2
  -3 -10   0 146.983 4.90921   3
   3  10   0 145.670 5.25022   3
   3  10   0 153.853 5.68700   1
   3  10   0 152.740 4.67646   2
  -4 -10   0 5.70016 1.06461   2
  -4 -10   0 5.21360 1.26193   3
  -4 -10   0 4.40744 1.56692   7
  -4 -10   0 7.83873 1.30578   3
  -4 -10   0 6.68359 1.50670   6
   4  10   0 6.47224 1.17926   2
   4  10   0 7.83897 1.65665   1
   4  10   0 5.48637 1.54400   3
  -5 -10   0 57.0315 2.51723   2
  -5 -10   0 54.9504 2.48632   3
  -5 -10   0 64.0406 3.45979   7
  -5 -10   0 56.6037 3.06075   6
  -5 -10   0 59.4459 2.55388   3
   5  10   0 56.0522 2.49940   2
   5  10   0 58.2437 3.56600   1
   5  10   0 57.1711 3.14963   3
  -6 -10   0 91.4973 4.20134   7
  -6 -10   0 81.5761 3.71676   6
  -6 -10   0 84.2953 2.85454   3
  -6 -10   0 85.8839 2.86692   3
   6  10   0 86.8383 3.78066   3
   6  10   0 85.9554 4.28781   1
   6  10   0 83.9597 3.10051   2
  -7 -10   0 37.4036 2.65869   6
  -7 -10   0 36.0354 1.34783   3
  -7 -10   0 34.6392 1.34090   3
  -7 -10   0 32.6545 2.98323   7
   7  10   0 37.8497 1.99087   2
   7  10   0 33.7225 2.55089   3
   7  10   0 35.0962 2.92143   1
  -8 -10   0 6.54343 1.67674   6
  -8 -10   0 9.23698 2.07360   7
   8  10   0 7.42670 1.13716   2
   8  10   0 6.72437 2.00021   1
   8  10   0 6.64550 1.52671   3
  -9 -10   0 93.9150 4.16515   6
  -9 -10   0 85.0471 4.59884   7
   9  10   0 83.6738 4.29367   1
   9  10   0 91.3064 3.76202   3
   9  10   0 90.4291 3.28315   2
 -10 -10   0 28.5696 2.84719   6
 -10 -10   0 31.7067 3.28414   7
  10  10   0 25.6519 2.15666   3
  10  10   0 26.6097 3.01507   1
  10  10   0 24.5865 1.87603   2
 -11 -10   0 7.04860 2.35449   7
 -11 -10   0 5.61454 1.77805   6
  11  10   0 7.98718 1.55301   3
  11  10   0 6.85580 2.25317   1
  11  10   0 3.34691 1.27526   2
 -12 -10   0 5.69304 2.37511   7
 -12 -10   0 6.38945 2.10327   6
  12  10   0 7.08257 1.50346   3
  12  10   0 6.84107 2.34430   1
 -13 -10   0 47.7392 4.38319   7
 -13 -10   0 46.8547 3.52311   6
  13  10   0 48.7540 2.80412   3
  13  10   0 47.7196 4.17123   1
  14  10   0 0.40848 2.28950   1
  15  10   0 41.4654 3.14907   2
  15  10   0 51.0590 4.53021   1
  16  10   0 -2.1157 2.16284   1
  17  10   0 24.2047 3.66061   1
  14 -11   0 19.5445 2.73156   4
  14 -11   0 10.0112 2.81270   2
  14 -11   0 23.3180 3.04686   3
 -14  11   0 19.1348 3.89986   5
  13 -11   0 -1.6837 1.97560   2
  13 -11   0 2.18695 1.81325   4
  13 -11   0 1.46963 2.04931   3
 -13  11   0 3.19924 2.83249   5
  12 -11   0 53.7087 4.00768   3
  12 -11   0 55.7465 4.58319   2
  12 -11   0 49.0323 3.66712   4
 -12  11   0 54.4360 4.85231   5
  11 -11   0 0.47803 1.80473   3
  11 -11   0 1.59367 1.68930   4
  11 -11   0 -0.4953 1.95132   2
 -11  11   0 0.78375 2.43354   5
  10 -11   0 10.6394 2.17505   2
  10 -11   0 11.8592 2.35175   3
  10 -11   0 9.10795 2.06787   4
 -10  11   0 15.5974 2.87379   5
   9 -11   0 -0.2850 1.78696   3
   9 -11   0 1.33865 1.80639   2
   9 -11   0 1.93869 1.62827   4
  -9  11   0 0.68490 0.96597   3
  -9  11   0 -0.9351 2.13869   5
   8 -11   0 8.10837 2.05303   3
   8 -11   0 8.94339 2.11898   2
   8 -11   0 10.3807 2.03589   4
  -8  11   0 7.07192 2.35966   5
  -8  11   0 6.29223 1.45086   3
   7 -11   0 1.58537 1.58039   4
   7 -11   0 1.32634 1.74762   3
   7 -11   0 1.07547 1.67422   2
  -7  11   0 -1.9922 1.84283   5
  -7  11   0 -0.1357 1.33721   3
  -7  11   0 1.73287 1.23697   3
   6 -11   0 99.6446 4.64112   2
   6 -11   0 98.1603 4.70703   3
   6 -11   0 105.423 4.40769   4
  -6  11   0 101.567 5.04426   5
  -6  11   0 105.714 4.43993   3
   5 -11   0 9.53308 2.04913   3
   5 -11   0 13.4297 1.90981   4
   5 -11   0 9.78744 1.95774   2
  -5  11   0 10.4683 1.94517   3
  -5  11   0 11.8625 2.41643   1
   4 -11   0 6.08158 1.69067   2
   4 -11   0 8.65556 1.64735   4
   4 -11   0 5.78114 1.79837   3
  -4  11   0 8.55070 1.89011   3
  -4  11   0 7.46984 2.08801   1
   3 -11   0 3.64006 1.42701   4
   3 -11   0 2.09651 1.13227   2
   3 -11   0 3.07023 1.63085   3
  -3  11   0 4.86114 1.93100   1
  -3  11   0 2.52281 1.60404   3
   2 -11   0 40.3656 2.73062   4
   2 -11   0 41.2978 2.64642   2
   2 -11   0 40.4386 3.05197   3
  -2  11   0 39.0383 2.98798   1
  -2  11   0 40.4585 3.02440   3
   1 -11   0 3.39720 1.24460   7
   1 -11   0 5.77683 1.54752   3
   1 -11   0 5.56619 1.52956   4
   1 -11   0 3.38008 1.30710   2
  -1  11   0 5.29456 1.93151   1
  -1  11   0 2.90666 1.63496   3
   0 -11   0 243.178 7.40339   4
   0 -11   0 234.171 7.20996   7
   0 -11   0 238.133 7.04262   2
   0 -11   0 236.304 7.36326   3
   0  11   0 251.421 8.11562   1
   0  11   0 239.377 7.76249   3
  -1 -11   0 412.248 11.1734   7
  -1 -11   0 394.762 11.1291   3
  -1 -11   0 418.264 10.8290   2
  -1 -11   0 404.274 11.2617   4
   1  11   0 420.351 11.8177   1
   1  11   0 414.773 11.5877   3
  -2 -11   0 27.4812 2.36408   3
  -2 -11   0 20.6398 2.22506   7
  -2 -11   0 21.1321 1.88880   2
   2  11   0 22.5763 2.63012   1
   2  11   0 24.4229 2.51411   3
   2  11   0 25.2411 1.99596   2
  -3 -11   0 6.97361 1.71509   7
  -3 -11   0 7.93828 1.49486   3
  -3 -11   0 6.95394 1.43898   3
  -3 -11   0 6.07986 1.16934   2
   3  11   0 3.81649 1.83945   1
   3  11   0 4.52248 1.64140   3
   3  11   0 8.66720 1.37423   2
  -4 -11   0 21.9995 2.40776   7
  -4 -11   0 17.5909 2.08955   6
  -4 -11   0 21.8820 1.98434   3
  -4 -11   0 19.5258 1.73360   2
  -4 -11   0 20.9982 1.88775   3
   4  11   0 15.2613 2.09911   3
   4  11   0 20.1202 2.52073   1
   4  11   0 21.5769 1.81202   2
  -5 -11   0 9.38022 1.32912   2
  -5 -11   0 7.92472 1.32318   3
  -5 -11   0 9.14368 1.37462   3
  -5 -11   0 9.42636 1.96048   7
  -5 -11   0 7.34660 1.69906   6
   5  11   0 7.76594 1.81430   3
   5  11   0 10.9631 1.37550   2
   5  11   0 8.83421 2.11021   1
  -6 -11   0 2.26480 0.96060   3
  -6 -11   0 1.94904 1.68281   7
  -6 -11   0 3.83240 1.51731   6
  -6 -11   0 1.86403 0.93771   3
   6  11   0 2.28127 1.51641   3
   6  11   0 4.88524 1.09937   2
   6  11   0 2.64653 1.84192   1
  -7 -11   0 59.2746 3.38511   6
  -7 -11   0 66.0900 2.26424   3
  -7 -11   0 61.6021 2.21584   3
  -7 -11   0 67.6704 3.93812   7
   7  11   0 60.1479 3.99220   1
   7  11   0 67.0529 3.45865   3
   7  11   0 63.5221 2.72188   2
  -8 -11   0 11.8387 2.38626   7
  -8 -11   0 11.1307 2.02628   6
   8  11   0 15.3617 2.04732   3
   8  11   0 8.61704 1.31225   2
   8  11   0 10.8815 2.36515   1
  -9 -11   0 183.748 7.13449   7
  -9 -11   0 172.246 6.35468   6
   9  11   0 187.347 7.16306   1
   9  11   0 189.244 5.53314   2
   9  11   0 181.720 6.13248   3
 -10 -11   0 4.89215 1.77051   6
 -10 -11   0 -0.4485 1.97534   7
  10  11   0 1.35831 1.11705   2
  10  11   0 1.49221 1.45026   3
  10  11   0 4.95035 2.17078   1
 -11 -11   0 1.78749 2.13348   7
 -11 -11   0 1.51213 1.69809   6
  11  11   0 1.17792 2.14718   1
  11  11   0 1.46953 1.42092   3
 -12 -11   0 2.68117 2.29598   7
 -12 -11   0 5.03831 1.93107   6
  12  11   0 6.90804 2.49897   1
  12  11   0 2.60382 1.54442   3
 -13 -11   0 27.2613 3.67936   7
 -13 -11   0 26.3482 3.17189   6
  13  11   0 32.6063 3.76711   1
  13  11   0 22.1061 2.28609   3
 -14 -11   0 4.93999 2.00785   6
  14  11   0 -1.4277 2.49984   1
  15  11   0 18.2988 3.31297   1
  16  11   0 23.4992 3.70950   1
  13 -12   0 8.81619 2.48748   3
  13 -12   0 4.68168 2.49912   2
  13 -12   0 11.4497 2.36103   4
 -13  12   0 4.15099 2.65176   5
  12 -12   0 4.06752 2.21761   3
  12 -12   0 0.28882 1.75853   4
  12 -12   0 2.01759 2.25331   2
 -12  12   0 3.24929 2.48476   5
  11 -12   0 12.2037 2.69398   2
  11 -12   0 21.2153 2.68155   4
  11 -12   0 18.4083 2.91180   3
 -11  12   0 19.3202 3.34177   5
  10 -12   0 0.33556 1.91721   3
  10 -12   0 -1.3997 1.83423   2
  10 -12   0 1.89134 1.77734   4
 -10  12   0 -0.3345 2.40894   5
   9 -12   0 2.84120 2.07397   3
   9 -12   0 4.72962 1.78605   4
   9 -12   0 6.50193 2.24606   2
  -9  12   0 4.56523 1.27026   3
  -9  12   0 4.03579 2.45589   5
   8 -12   0 3.26963 1.96662   2
   8 -12   0 1.57699 1.78365   3
   8 -12   0 3.46959 1.88943   4
  -8  12   0 3.41731 1.44500   3
  -8  12   0 4.00460 2.42184   5
   7 -12   0 10.4342 2.19151   2
   7 -12   0 8.34765 2.11262   3
   7 -12   0 4.87443 1.89474   4
  -7  12   0 3.38321 2.14771   5
  -7  12   0 4.33435 1.65644   3
   6 -12   0 27.4503 2.81932   2
   6 -12   0 28.8843 2.68862   4
   6 -12   0 35.2841 3.28921   3
  -6  12   0 29.6051 3.38040   5
  -6  12   0 28.2946 2.71215   3
   5 -12   0 27.1647 2.65503   2
   5 -12   0 25.8308 2.77447   3
   5 -12   0 26.4591 2.54698   4
  -5  12   0 28.2979 2.82101   3
  -5  12   0 25.9307 3.15161   1
   4 -12   0 53.4946 3.23167   4
   4 -12   0 60.7752 3.77782   3
   4 -12   0 48.6708 3.26488   2
  -4  12   0 51.8569 3.53974   3
  -4  12   0 55.0332 4.03983   1
   3 -12   0 32.9071 2.64815   2
   3 -12   0 34.6162 2.96765   3
   3 -12   0 27.9845 2.59353   4
  -3  12   0 32.0857 3.26008   1
  -3  12   0 28.4913 2.89168   3
   2 -12   0 119.535 4.50292   7
   2 -12   0 119.640 4.93151   3
   2 -12   0 120.745 4.67800   2
   2 -12   0 117.613 4.73872   4
  -2  12   0 111.022 4.99339   3
  -2  12   0 124.149 5.61337   1
   1 -12   0 4.85138 1.42333   2
   1 -12   0 6.42204 1.64400   4
   1 -12   0 8.50908 1.81430   3
   1 -12   0 6.87318 1.62036   7
  -1  12   0 5.38644 2.09030   1
  -1  12   0 5.43943 1.98247   3
   0 -12   0 11.5913 1.78583   7
  -1 -12   0 117.698 4.72031   7
  -1 -12   0 123.869 4.87464   4
  -1 -12   0 114.339 4.78510   3
  -1 -12   0 128.679 4.48464   2
   1  12   0 129.032 5.30806   3
   1  12   0 129.457 5.34662   1
  -2 -12   0 36.8573 2.33174   2
  -2 -12   0 37.4424 2.78893   7
  -2 -12   0 38.1372 2.80394   3
   2  12   0 43.4478 3.53192   1
   2  12   0 42.3264 3.14999   3
  -3 -12   0 3.61131 1.49219   3
  -3 -12   0 3.77665 1.14728   2
  -3 -12   0 3.91596 1.64508   7
   3  12   0 2.83771 1.96215   1
   3  12   0 6.99531 1.98218   3
  -4 -12   0 52.3782 3.14839   6
  -4 -12   0 47.2882 2.75076   3
  -4 -12   0 50.6615 3.32108   7
  -4 -12   0 48.1384 2.59873   2
   4  12   0 51.2859 3.27987   3
   4  12   0 50.1416 3.00624   2
   4  12   0 48.3896 3.64398   1
  -5 -12   0 16.8204 2.18848   6
  -5 -12   0 22.6926 1.97311   3
  -5 -12   0 16.9825 2.39379   7
  -5 -12   0 18.0929 1.79507   3
  -5 -12   0 19.7806 1.81546   2
   5  12   0 17.6097 2.39684   3
   5  12   0 18.7463 2.59996   1
   5  12   0 19.3203 1.78408   2
  -6 -12   0 1.28516 1.01976   3
  -6 -12   0 -1.3610 1.56778   7
  -6 -12   0 1.22133 1.49454   6
  -6 -12   0 0.24100 0.99351   3
   6  12   0 2.06279 1.10416   2
   6  12   0 -1.5865 1.39864   3
   6  12   0 0.07658 1.82022   1
  -7 -12   0 19.9914 1.49202   3
  -7 -12   0 23.1299 1.56440   3
  -7 -12   0 22.7158 2.51182   6
  -7 -12   0 19.8254 2.72093   7
   7  12   0 23.2721 1.93245   2
   7  12   0 29.5237 3.19042   1
   7  12   0 25.1337 2.65496   3
  -8 -12   0 9.97617 2.04040   6
  -8 -12   0 7.80664 0.64018   3
  -8 -12   0 9.30505 2.31260   7
  -8 -12   0 8.09580 0.60259   3
   8  12   0 6.67027 1.32565   2
   8  12   0 7.97986 2.36981   1
   8  12   0 8.23886 1.97124   3
  -9 -12   0 4.58710 2.19753   7
  -9 -12   0 1.08739 1.61707   6
   9  12   0 1.82900 1.63412   3
   9  12   0 1.70269 1.75822   1
 -10 -12   0 0.41100 2.03672   7
 -10 -12   0 2.45916 1.75772   6
  10  12   0 3.57116 2.19824   1
  10  12   0 -1.1900 1.49898   3
 -11 -12   0 4.33052 1.86902   6
 -11 -12   0 -0.3264 2.16411   7
  11  12   0 3.58208 1.70916   3
  11  12   0 -0.1310 2.15051   1
 -12 -12   0 -0.9306 2.15113   7
 -12 -12   0 -1.3792 1.54917   6
  12  12   0 3.19057 1.68458   3
  12  12   0 1.70765 2.23649   1
 -13 -12   0 -1.7729 2.11584   7
 -13 -12   0 3.93546 2.26623   6
  13  12   0 -1.1488 2.24161   1
  13  12   0 -1.3512 1.52652   3
 -14 -12   0 0.30316 2.03239   6
 -14 -12   0 1.55689 2.39959   7
  14  12   0 -4.2168 2.03405   1
 -15 -12   0 2.03282 2.01531   6
  15  12   0 3.13333 2.58123   1
  16  12   0 2.52129 2.75886   1
  12 -13   0 2.52155 2.21103   3
  12 -13   0 -0.5278 1.97764   2
  12 -13   0 1.28555 1.91703   4
 -12  13   0 5.55770 2.89855   5
  11 -13   0 -2.0207 1.88809   3
  11 -13   0 1.11715 1.92183   4
  11 -13   0 0.68896 2.08948   2
 -11  13   0 4.08671 2.81132   5
  10 -13   0 11.5760 2.61362   2
  10 -13   0 10.5114 2.35519   4
  10 -13   0 7.80588 2.47895   3
 -10  13   0 9.40973 2.77133   5
   9 -13   0 1.53160 2.00727   3
   9 -13   0 1.85113 1.94184   4
   9 -13   0 0.81478 1.95883   2
  -9  13   0 2.55873 2.26581   5
   8 -13   0 18.0807 2.70184   2
   8 -13   0 14.6584 2.30090   4
   8 -13   0 18.9128 2.93798   3
  -8  13   0 14.3498 2.84660   5
  -8  13   0 18.6761 2.18811   3
   7 -13   0 4.46847 2.00087   2
   7 -13   0 4.96977 2.16701   3
   7 -13   0 3.22128 1.71589   4
  -7  13   0 0.84990 1.62270   3
  -7  13   0 0.81720 2.19353   5
   6 -13   0 -0.4538 1.48087   4
   6 -13   0 3.14952 1.87583   2
   6 -13   0 -1.0601 1.72243   3
  -6  13   0 0.88533 2.03980   5
  -6  13   0 -0.0767 1.65944   3
   5 -13   0 22.4326 2.88513   3
   5 -13   0 25.5126 2.80957   2
   5 -13   0 27.6418 2.87459   4
  -5  13   0 27.5732 3.37800   1
  -5  13   0 26.7156 2.93457   3
   4 -13   0 13.7253 2.47623   3
   4 -13   0 14.5270 2.19587   4
   4 -13   0 12.4022 2.09181   2
  -4  13   0 14.9093 2.44068   3
  -4  13   0 9.46714 2.58892   1
   3 -13   0 5.67927 1.73624   4
   3 -13   0 7.70765 2.02098   3
   3 -13   0 7.37445 1.72979   7
   3 -13   0 4.80235 1.66655   2
  -3  13   0 10.2772 2.30515   3
  -3  13   0 6.67933 2.08546   1
   2 -13   0 32.0054 2.84193   4
   2 -13   0 36.7524 2.71702   7
   2 -13   0 39.0920 2.81190   2
   2 -13   0 30.9248 2.95843   3
  -2  13   0 28.9458 3.30678   1
  -2  13   0 37.0664 3.32179   3
   1 -13   0 5.06387 1.74091   3
   1 -13   0 5.69415 1.55338   2
   1 -13   0 4.07533 1.43229   4
   1 -13   0 5.18072 1.53927   7
  -1  13   0 5.02914 2.03628   3
  -1  13   0 2.47244 2.13611   1
   0 -13   0 21.3708 2.38117   4
  -1 -13   0 35.5974 2.98702   4
  -1 -13   0 36.8308 3.00580   7
  -1 -13   0 29.4627 2.68398   3
  -1 -13   0 38.6102 2.52606   2
   1  13   0 39.2340 3.44117   3
   1  13   0 41.3943 3.23339   1
  -2 -13   0 39.6097 3.18412   7
  -2 -13   0 44.6667 2.90797   3
  -2 -13   0 40.0881 2.53749   2
   2  13   0 40.6526 3.56904   1
   2  13   0 42.7933 3.42068   3
  -3 -13   0 84.5573 4.27240   7
  -3 -13   0 81.0355 3.94916   3
  -3 -13   0 97.4111 3.68803   2
   3  13   0 94.9782 5.00117   1
   3  13   0 88.8935 4.49812   3
  -4 -13   0 181.779 5.97272   3
  -4 -13   0 183.489 5.68526   2
  -4 -13   0 182.118 6.62923   7
  -4 -13   0 180.996 6.39848   6
   4  13   0 170.399 6.97734   1
   4  13   0 183.741 6.82088   3
  -5 -13   0 15.0614 1.81115   3
  -5 -13   0 15.9601 2.31729   6
  -5 -13   0 22.8992 1.99327   2
  -5 -13   0 18.4213 2.66175   7
   5  13   0 18.6556 2.86094   1
   5  13   0 20.2976 2.64403   3
  -6 -13   0 61.7915 4.00763   7
  -6 -13   0 63.3537 2.91369   3
  -6 -13   0 53.7192 3.49551   6
  -6 -13   0 62.9127 2.89843   3
   6  13   0 60.0389 3.93370   3
   6  13   0 65.3880 4.40526   1
  -7 -13   0 31.3023 1.95720   3
  -7 -13   0 33.2920 3.37943   7
  -7 -13   0 29.3900 1.97645   3
  -7 -13   0 33.0097 3.06971   6
   7  13   0 33.4827 3.59785   1
   7  13   0 33.8451 3.18406   3
  -8 -13   0 41.6364 3.30073   6
  -8 -13   0 46.7126 1.84755   3
  -8 -13   0 53.4467 3.97037   7
   8  13   0 47.8065 4.09212   1
   8  13   0 50.9740 3.60475   3
  -9 -13   0 7.89945 2.49110   7
  -9 -13   0 13.3443 2.47224   6
   9  13   0 8.78614 2.25234   1
   9  13   0 4.88922 2.02733   3
 -10 -13   0 45.8851 3.71417   6
 -10 -13   0 48.2341 4.29219   7
  10  13   0 43.0470 4.12025   1
  10  13   0 40.1360 3.30253   3
 -11 -13   0 4.27005 2.41486   7
 -11 -13   0 4.09271 2.11715   6
  11  13   0 -0.8729 1.68180   3
  11  13   0 5.62576 2.56942   1
 -12 -13   0 5.73197 2.16446   6
 -12 -13   0 2.20705 2.43663   7
  12  13   0 4.64215 2.57007   1
  12  13   0 9.27084 2.14866   3
 -13 -13   0 0.73336 2.49434   7
 -13 -13   0 0.57433 2.04389   6
  13  13   0 0.98161 1.80160   3
  13  13   0 -0.6076 2.47596   1
 -14 -13   0 0.70887 2.39957   7
 -14 -13   0 0.13904 1.89923   6
  14  13   0 -2.7937 2.64664   1
 -15 -13   0 5.83191 2.23959   6
  15  13   0 0.50305 2.60857   1
  11 -14   0 5.62572 2.49964   3
  11 -14   0 1.12338 2.19506   2
  11 -14   0 4.19795 1.90689   4
 -11  14   0 9.53649 3.09294   5
  10 -14   0 12.8534 2.37784   4
  10 -14   0 21.5031 3.18575   3
  10 -14   0 19.8429 3.09158   2
 -10  14   0 17.3920 3.42790   5
   9 -14   0 6.65129 2.46358   3
   9 -14   0 4.17544 2.21769   2
   9 -14   0 1.55093 1.71779   4
  -9  14   0 3.61567 2.36093   5
   8 -14   0 18.7699 2.74759   4
   8 -14   0 21.7821 3.02129   3
   8 -14   0 18.2154 2.84906   2
  -8  14   0 19.5649 2.41081   3
  -8  14   0 19.6687 3.23610   5
   7 -14   0 -1.5822 1.53605   4
   7 -14   0 -0.7924 1.86881   3
   7 -14   0 -2.3792 1.67667   2
  -7  14   0 0.65482 1.71296   3
  -7  14   0 0.56149 2.01612   5
   6 -14   0 49.8228 4.09621   3
   6 -14   0 37.5678 3.44476   2
   6 -14   0 44.6906 3.37119   4
  -6  14   0 41.1582 3.42269   3
  -6  14   0 38.3610 4.26260   5
   5 -14   0 11.7062 2.23635   2
   5 -14   0 11.6614 2.39759   3
   5 -14   0 12.5330 2.44143   4
  -5  14   0 11.0834 2.31945   3
  -5  14   0 12.4610 2.77645   1
   4 -14   0 5.15852 2.02410   3
   4 -14   0 4.30825 1.78082   2
   4 -14   0 4.45936 1.55606   7
   4 -14   0 6.17244 1.89232   4
  -4  14   0 1.95146 2.17781   1
  -4  14   0 2.15282 1.96034   3
   3 -14   0 8.19441 2.33240   3
   3 -14   0 11.9112 2.10095   2
   3 -14   0 9.65207 1.90125   7
   3 -14   0 8.84380 2.05213   4
  -3  14   0 8.30682 2.62471   1
  -3  14   0 10.3330 2.52255   3
   2 -14   0 28.7569 2.89508   4
   2 -14   0 28.5879 2.75477   7
   2 -14   0 29.2279 2.97191   3
   2 -14   0 26.9062 2.61504   2
  -2  14   0 26.5119 3.14726   1
  -2  14   0 21.5293 2.98965   3
   1 -14   0 3.04486 1.62013   7
   1 -14   0 -1.5328 1.48643   4
   1 -14   0 0.99532 1.43085   2
   1 -14   0 1.21495 1.73908   3
  -1  14   0 -1.2822 2.04057   1
  -1  14   0 1.30127 2.09009   3
   0 -14   0 60.8154 3.52336   2
   0 -14   0 71.1582 3.96277   4
   0 -14   0 61.3859 3.57996   7
   0 -14   0 63.1167 3.93069   3
   0  14   0 59.9077 4.53864   1
   0  14   0 73.8746 4.31311   3
  -1 -14   0 87.2924 4.29401   7
  -1 -14   0 83.2861 4.38242   4
  -1 -14   0 90.9779 4.48121   3
  -1 -14   0 89.1331 3.89266   2
   1  14   0 89.8591 4.90882   3
   1  14   0 97.4204 4.92881   1
  -2 -14   0 1.76377 1.60237   3
  -2 -14   0 3.10749 1.35022   2
  -2 -14   0 3.83469 1.77405   7
   2  14   0 2.34199 2.05471   3
   2  14   0 0.09893 2.02535   1
  -3 -14   0 29.4689 3.00492   7
  -3 -14   0 35.3538 2.89512   3
  -3 -14   0 28.4658 2.38594   2
   3  14   0 20.4136 2.81490   3
   3  14   0 36.4173 3.56653   1
  -4 -14   0 3.15053 1.54359   3
  -4 -14   0 1.20336 1.73212   7
  -4 -14   0 -0.8242 1.26642   2
   4  14   0 2.18544 1.98417   3
   4  14   0 1.76434 2.18570   1
  -5 -14   0 2.33410 1.38492   3
  -5 -14   0 0.96837 1.67791   6
  -5 -14   0 1.11403 1.32445   2
  -5 -14   0 3.07504 1.95848   7
   5  14   0 0.69111 1.83369   3
   5  14   0 3.67875 2.25666   1
  -6 -14   0 49.4961 2.80818   3
  -6 -14   0 47.3851 3.90647   7
  -6 -14   0 43.0506 3.32583   6
  -6 -14   0 47.5754 3.10055   3
   6  14   0 50.5430 3.67883   3
   6  14   0 49.5747 4.24166   1
  -7 -14   0 10.5315 1.46703   3
  -7 -14   0 10.8510 2.44053   6
  -7 -14   0 11.3642 2.54015   7
   7  14   0 9.29745 2.41959   3
   7  14   0 8.77939 2.63436   1
  -8 -14   0 3.54966 2.18963   6
  -8 -14   0 5.32286 0.96572   3
  -8 -14   0 3.37763 2.32041   7
   8  14   0 4.93697 2.51714   1
   8  14   0 4.34116 2.09970   3
  -9 -14   0 30.8061 3.33875   6
  -9 -14   0 33.0173 3.72455   7
   9  14   0 27.0080 3.54850   1
   9  14   0 35.0680 3.39139   3
 -10 -14   0 5.63764 2.61338   7
 -10 -14   0 9.18154 2.43680   6
  10  14   0 14.0831 2.50043   3
  10  14   0 8.55377 2.79401   1
 -11 -14   0 8.89775 2.74859   7
 -11 -14   0 5.70599 2.13688   6
  11  14   0 5.18327 2.71711   1
  11  14   0 11.5068 2.37944   3
 -12 -14   0 1.96655 2.53498   7
 -12 -14   0 4.92663 2.05982   6
  12  14   0 5.28349 2.71314   1
  12  14   0 2.88779 1.92672   3
 -13 -14   0 2.50703 2.68017   7
 -13 -14   0 2.58457 2.03475   6
  13  14   0 1.49523 2.59771   1
  13  14   0 -0.9245 1.83398   3
 -14 -14   0 1.12938 2.18103   6
 -14 -14   0 6.62696 2.92806   7
  14  14   0 -1.8294 2.54473   1
 -15 -14   0 6.02858 2.61877   6
 -15 -14   0 4.51849 2.86382   7
  15  14   0 1.20787 2.90441   1
  10 -15   0 17.2649 3.03655   3
  10 -15   0 9.62520 2.57719   4
  10 -15   0 19.9752 3.11081   2
 -10  15   0 12.3565 3.08183   5
   9 -15   0 27.2360 3.25086   4
   9 -15   0 28.3252 3.60285   3
   9 -15   0 24.3866 3.30730   2
  -9  15   0 25.6591 3.67224   5
   8 -15   0 4.05590 2.14233   2
   8 -15   0 1.85797 1.84432   4
   8 -15   0 3.64941 2.32517   3
  -8  15   0 4.32198 1.80600   3
  -8  15   0 2.84837 2.56549   5
   7 -15   0 45.2330 3.94337   2
   7 -15   0 50.1748 4.35160   3
   7 -15   0 41.1239 3.54507   4
  -7  15   0 41.9896 3.47892   3
  -7  15   0 46.3304 4.65426   5
   6 -15   0 3.25075 2.15805   3
   6 -15   0 1.21371 1.91493   2
   6 -15   0 3.00857 1.84229   4
  -6  15   0 4.94434 2.51333   5
  -6  15   0 -1.8903 1.79494   3
   5 -15   0 51.1005 3.74583   2
   5 -15   0 51.2535 3.67900   4
   5 -15   0 53.9429 3.34462   7
   5 -15   0 46.6097 4.08016   3
  -5  15   0 52.7411 4.68778   1
  -5  15   0 45.4689 3.84419   3
   4 -15   0 -1.7558 1.60954   2
   4 -15   0 1.73462 2.12576   3
   4 -15   0 -0.9331 1.53266   7
   4 -15   0 0.11314 1.71877   4
  -4  15   0 2.70049 2.32812   1
  -4  15   0 -0.5625 1.94225   3
   3 -15   0 16.7382 2.59973   4
   3 -15   0 15.5162 2.28924   7
   3 -15   0 24.0733 2.69459   2
   3 -15   0 22.8169 3.01787   3
  -3  15   0 19.9384 3.07366   3
  -3  15   0 19.2456 3.31195   1
   2 -15   0 6.07794 1.89801   2
   2 -15   0 7.22168 1.87580   7
   2 -15   0 5.68094 1.99094   4
   2 -15   0 2.56920 1.98600   3
  -2  15   0 -3.4692 1.98244   3
  -2  15   0 3.71106 2.41415   1
   1 -15   0 3.04034 1.86227   4
   1 -15   0 2.36472 1.82452   3
   1 -15   0 4.50078 1.68061   2
   1 -15   0 1.47582 1.74912   7
  -1  15   0 3.39043 2.41467   1
  -1  15   0 2.52366 2.15045   3
   0 -15   0 7.57607 2.02680   4
   0 -15   0 11.6821 2.37871   3
   0 -15   0 7.35181 1.76944   2
   0 -15   0 9.74289 2.05858   7
   0  15   0 10.6676 2.70641   1
   0  15   0 9.02999 2.52509   3
  -1 -15   0 21.3349 2.82034   7
  -1 -15   0 22.4894 2.32480   2
  -1 -15   0 25.0317 2.81751   3
   1  15   0 26.7819 3.30273   3
   1  15   0 22.6090 3.30596   1
  -2 -15   0 3.62523 1.46631   2
  -2 -15   0 3.26232 1.85743   7
  -2 -15   0 5.51436 1.98063   3
   2  15   0 4.20973 2.45586   1
   2  15   0 6.66124 2.28235   3
  -3 -15   0 48.6472 3.36045   3
  -3 -15   0 52.6870 3.69617   7
  -3 -15   0 47.2612 2.88759   2
   3  15   0 43.9627 3.98521   3
   3  15   0 41.2414 4.09694   1
  -4 -15   0 24.9965 2.98931   6
  -4 -15   0 23.5475 2.47787   3
  -4 -15   0 32.1624 3.32682   7
  -4 -15   0 28.2578 2.47206   2
   4  15   0 29.5773 3.25669   3
   4  15   0 25.9385 3.54358   1
  -5 -15   0 1.98175 1.96697   6
  -5 -15   0 3.33720 2.03248   7
  -5 -15   0 2.65514 1.30076   2
  -5 -15   0 3.98258 1.55150   3
   5  15   0 3.73981 2.04774   1
   5  15   0 5.74883 2.17060   3
  -6 -15   0 32.0490 2.49303   3
  -6 -15   0 34.4453 2.60673   2
  -6 -15   0 33.9163 3.31936   6
  -6 -15   0 27.3671 3.34570   7
   6  15   0 36.9518 3.97569   1
   6  15   0 39.7577 3.76829   3
  -7 -15   0 -1.0886 1.94446   6
  -7 -15   0 0.03255 2.02879   7
  -7 -15   0 -0.9863 1.07977   3
   7  15   0 3.51733 2.15371   3
   7  15   0 4.00381 2.57399   1
  -8 -15   0 4.19718 2.41252   7
  -8 -15   0 3.85103 1.04206   3
  -8 -15   0 3.74420 2.01887   6
   8  15   0 3.12315 2.51224   1
   8  15   0 2.69294 2.15822   3
  -9 -15   0 13.9496 2.53383   6
  -9 -15   0 11.1835 2.88580   7
   9  15   0 11.8457 2.64096   3
   9  15   0 10.8622 3.11042   1
 -10 -15   0 60.7288 5.01092   7
 -10 -15   0 54.0413 3.93816   6
  10  15   0 51.9955 4.72554   1
  10  15   0 55.2084 4.16448   3
 -11 -15   0 3.78377 2.08809   6
 -11 -15   0 2.68458 2.59896   7
  11  15   0 1.84302 2.63306   1
  11  15   0 0.18946 1.95262   3
 -12 -15   0 9.39297 2.98926   7
 -12 -15   0 11.4089 2.66136   6
  12  15   0 3.69236 2.93022   1
  12  15   0 6.23570 2.32335   3
 -13 -15   0 -2.8387 2.23220   7
 -13 -15   0 1.38476 2.00994   6
  13  15   0 -3.2948 2.45703   1
  13  15   0 1.10265 2.03558   3
 -14 -15   0 -0.7638 2.45165   7
 -14 -15   0 0.17344 1.98964   6
  14  15   0 -5.7878 2.49207   1
   9 -16   0 3.66572 2.45455   2
   9 -16   0 3.11605 2.23175   4
   9 -16   0 6.56002 2.49494   3
  -9  16   0 9.94405 3.18150   5
   8 -16   0 13.4664 2.55261   4
   8 -16   0 15.2346 3.00214   3
   8 -16   0 12.8322 2.76320   2
  -8  16   0 10.7618 2.25783   3
  -8  16   0 18.6374 3.30733   5
   7 -16   0 -0.8980 2.03501   3
   7 -16   0 -1.2148 1.74480   4
   7 -16   0 1.61973 2.02042   2
  -7  16   0 0.11549 1.96092   3
  -7  16   0 2.63344 2.38832   5
   6 -16   0 36.5473 3.60580   2
   6 -16   0 42.1939 3.34386   7
   6 -16   0 42.7803 3.74512   4
   6 -16   0 44.3869 4.08588   3
  -6  16   0 33.4760 4.25686   5
  -6  16   0 41.4272 3.80792   3
   5 -16   0 4.82396 2.37174   3
   5 -16   0 2.05422 1.69635   7
   5 -16   0 2.40139 1.97268   4
   5 -16   0 3.02445 2.04256   2
  -5  16   0 0.64015 1.91301   3
  -5  16   0 0.07118 2.35339   1
   4 -16   0 0.93920 1.73310   7
   4 -16   0 -0.7960 1.67165   2
   4 -16   0 3.61869 2.35423   3
   4 -16   0 -3.9410 1.64579   4
  -4  16   0 2.38557 2.28058   3
  -4  16   0 5.52932 2.63334   1
   3 -16   0 23.9825 3.10091   3
   3 -16   0 41.2502 3.57467   4
   3 -16   0 29.0049 3.08252   2
   3 -16   0 30.1931 2.93295   7
  -3  16   0 28.8821 3.82839   1
  -3  16   0 36.6928 3.83599   3
   2 -16   0 1.59825 1.88158   4
   2 -16   0 3.19734 1.86443   7
   2 -16   0 2.53700 2.15817   3
   2 -16   0 4.14606 1.89338   2
  -2  16   0 6.46211 2.27178   1
  -2  16   0 3.63867 2.28452   3
   1 -16   0 156.778 6.05759   7
   1 -16   0 161.549 6.01579   2
   1 -16   0 151.018 6.36202   3
   1 -16   0 143.441 6.24432   4
  -1  16   0 156.609 7.34461   1
  -1  16   0 157.369 6.99902   3
   0 -16   0 1.51054 2.00543   3
   0 -16   0 3.79614 1.85101   7
   0 -16   0 1.79508 1.62022   2
   0 -16   0 1.96819 1.91930   4
   0  16   0 0.82125 2.39139   1
   0  16   0 5.30827 2.52464   3
  -1 -16   0 3.26035 1.83289   3
  -1 -16   0 10.1334 1.95292   2
  -1 -16   0 6.12860 2.25007   7
   1  16   0 7.37025 2.70420   1
   1  16   0 10.5473 2.54751   3
  -2 -16   0 8.80683 2.17514   3
  -2 -16   0 9.46277 1.81245   2
  -2 -16   0 11.7347 2.52655   7
   2  16   0 6.99844 2.77435   1
   2  16   0 10.8065 2.62043   3
  -3 -16   0 22.3617 2.31923   2
  -3 -16   0 27.0822 3.15187   7
  -3 -16   0 18.4427 2.38311   3
   3  16   0 25.3887 3.54826   1
   3  16   0 26.9167 3.32077   3
  -4 -16   0 2.81644 2.06941   6
  -4 -16   0 12.8113 2.61021   7
  -4 -16   0 8.68065 1.97648   3
  -4 -16   0 7.80653 1.67462   2
   4  16   0 8.90559 2.56725   3
   4  16   0 7.68209 2.71051   1
  -5 -16   0 6.16745 2.27696   7
  -5 -16   0 3.93635 1.44912   2
  -5 -16   0 6.82804 1.81750   3
  -5 -16   0 4.70149 2.22326   6
   5  16   0 7.06001 2.38547   3
   5  16   0 2.16909 2.44685   1
  -6 -16   0 40.1383 3.63933   6
  -6 -16   0 39.3013 2.84554   2
  -6 -16   0 48.4395 4.21226   7
  -6 -16   0 36.0470 2.75075   3
   6  16   0 33.7671 3.96498   1
   6  16   0 51.7381 4.27457   3
  -7 -16   0 18.1715 2.83502   6
  -7 -16   0 20.7696 3.24007   7
  -7 -16   0 16.1740 1.85952   3
   7  16   0 16.2956 2.95834   3
   7  16   0 12.0193 3.10418   1
  -8 -16   0 2.20588 2.38694   7
  -8 -16   0 1.33771 1.92689   6
   8  16   0 0.32768 2.54969   1
   8  16   0 1.18266 2.19561   3
  -9 -16   0 -0.4890 2.24991   7
  -9 -16   0 2.18273 1.94074   6
   9  16   0 1.46763 2.20103   3
   9  16   0 -1.0991 2.43481   1
 -10 -16   0 5.02853 2.61508   7
 -10 -16   0 11.0125 2.52801   6
  10  16   0 4.31042 2.37840   3
  10  16   0 0.68560 2.64448   1
 -11 -16   0 7.90441 2.61698   6
 -11 -16   0 8.80892 2.95493   7
  11  16   0 7.38216 2.97283   1
  11  16   0 11.9390 2.75778   3
 -12 -16   0 52.6674 4.42160   6
 -12 -16   0 48.7509 5.01885   7
  12  16   0 47.4686 4.24785   3
  12  16   0 48.0834 5.13028   1
 -13 -16   0 -0.1122 2.56516   7
 -13 -16   0 2.27729 2.18606   6
  13  16   0 1.08272 2.29062   3
  13  16   0 1.98136 2.95009   1
   8 -17   0 39.1709 4.15083   3
   8 -17   0 35.5057 3.79868   2
   8 -17   0 35.3521 3.63756   4
  -8  17   0 34.2486 4.53159   5
   7 -17   0 18.2186 3.13833   3
   7 -17   0 15.7392 2.94866   2
   7 -17   0 14.1736 2.74810   4
  -7  17   0 14.5314 3.32092   5
  -7  17   0 11.8633 2.58488   3
   6 -17   0 -0.3772 1.93681   2
   6 -17   0 5.93464 2.03728   7
   6 -17   0 5.45050 2.63399   3
   6 -17   0 5.80562 2.21850   4
  -6  17   0 1.05511 2.09766   3
  -6  17   0 0.09932 2.53372   5
   5 -17   0 1.50129 1.95874   2
   5 -17   0 2.43703 1.90837   7
   5 -17   0 2.73773 2.28826   4
   5 -17   0 4.62145 2.45544   3
  -5  17   0 -0.4836 2.15775   3
  -5  17   0 1.70726 2.38736   1
   4 -17   0 0.93809 1.83419   2
   4 -17   0 -0.2150 1.66501   7
   4 -17   0 2.50607 2.02069   4
   4 -17   0 2.51141 2.16844   3
  -4  17   0 2.44753 2.52596   1
  -4  17   0 0.80929 2.28741   3
   3 -17   0 2.85017 1.91771   2
   3 -17   0 3.11143 2.10102   4
   3 -17   0 1.85994 1.91549   7
   3 -17   0 1.62924 2.10015   3
  -3  17   0 2.03511 2.55552   1
  -3  17   0 4.27120 2.43271   3
   2 -17   0 20.4053 2.74011   2
   2 -17   0 26.9700 3.05569   7
   2 -17   0 25.7480 3.11839   4
   2 -17   0 28.6818 3.43286   3
  -2  17   0 23.4441 3.62529   1
  -2  17   0 24.2131 3.53587   3
   1 -17   0 167.020 6.60104   2
   1 -17   0 200.779 7.41903   4
   1 -17   0 171.038 6.73421   7
   1 -17   0 182.764 7.27975   3
  -1  17   0 181.389 8.18102   1
  -1  17   0 179.039 7.78877   3
   0 -17   0 167.595 6.78891   3
   0 -17   0 169.300 6.22451   2
   0 -17   0 163.103 6.51300   7
   0  17   0 164.487 7.36372   1
   0  17   0 144.015 7.18182   3
  -1 -17   0 1.72750 2.02436   7
  -1 -17   0 0.78079 1.83593   3
  -1 -17   0 0.89243 1.56489   2
   1  17   0 1.49469 2.17852   3
   1  17   0 4.08481 2.69118   1
  -2 -17   0 8.42514 2.09335   3
  -2 -17   0 7.07982 2.32782   7
  -2 -17   0 5.43073 1.74053   2
   2  17   0 9.06136 2.95624   1
   2  17   0 2.96991 2.62320   3
  -3 -17   0 -1.9054 1.28188   2
  -3 -17   0 -1.7192 1.83113   7
  -3 -17   0 2.59594 1.82207   3
   3  17   0 1.57140 2.46626   1
   3  17   0 2.14809 2.34897   3
  -4 -17   0 6.32229 1.97728   3
  -4 -17   0 2.31495 2.24798   7
  -4 -17   0 4.52242 1.73042   2
  -4 -17   0 7.86513 2.38665   6
   4  17   0 7.51948 2.67809   3
   4  17   0 7.12212 2.85256   1
  -5 -17   0 56.6503 4.10038   6
  -5 -17   0 51.2604 3.43971   3
  -5 -17   0 51.1328 3.12725   2
  -5 -17   0 49.8581 4.33278   7
   5  17   0 55.3378 4.81253   3
   5  17   0 50.6228 4.84827   1
  -6 -17   0 6.14574 2.52331   7
  -6 -17   0 4.58022 1.51487   2
  -6 -17   0 2.85577 2.12371   6
  -6 -17   0 1.71706 1.46534   3
   6  17   0 3.04366 2.29463   3
   6  17   0 1.87313 2.12189   1
  -7 -17   0 16.8853 2.98431   6
  -7 -17   0 12.4718 2.93329   7
  -7 -17   0 13.4132 1.84528   3
   7  17   0 13.4265 2.86350   3
   7  17   0 10.0859 3.12248   1
  -8 -17   0 2.49452 2.43453   7
  -8 -17   0 3.21362 2.03695   6
   8  17   0 -1.9970 2.15428   3
   8  17   0 -3.9228 2.44367   1
  -9 -17   0 26.5680 3.83887   7
  -9 -17   0 28.9212 3.42562   6
   9  17   0 27.5075 3.43940   3
   9  17   0 27.8151 3.63350   1
 -10 -17   0 -3.0423 2.36025   7
 -10 -17   0 4.25343 2.26744   6
  10  17   0 5.23124 2.56276   3
  10  17   0 3.49027 2.92472   1
 -11 -17   0 11.3517 3.15089   7
 -11 -17   0 9.80592 2.65045   6
  11  17   0 9.99131 2.86033   3
  11  17   0 11.2549 3.34944   1
 -12 -17   0 33.5542 3.95574   6
 -12 -17   0 39.6325 4.61681   7
  12  17   0 27.4873 4.37507   1
  12  17   0 21.6788 3.44365   3
   7 -18   0 0.55136 2.15121   2
   7 -18   0 1.20793 2.09628   4
   7 -18   0 4.67879 2.73433   3
  -7  18   0 0.93566 2.53893   5
  -7  18   0 0.14850 2.04997   3
   6 -18   0 4.00949 2.30610   2
   6 -18   0 5.35063 2.63357   3
   6 -18   0 0.48542 2.35733   4
  -6  18   0 7.80208 2.56710   3
  -6  18   0 -1.4823 3.07724   5
   5 -18   0 11.9115 2.90834   3
   5 -18   0 11.0801 2.52977   2
   5 -18   0 11.0879 2.47950   7
   5 -18   0 12.9464 2.70670   4
  -5  18   0 14.7661 3.28402   1
  -5  18   0 11.8382 2.85144   3
   4 -18   0 5.24332 2.35758   4
   4 -18   0 10.1613 2.72637   3
   4 -18   0 4.52697 2.10062   7
   4 -18   0 7.04248 2.33185   2
  -4  18   0 11.3283 3.11336   1
  -4  18   0 4.35501 2.54159   3
   3 -18   0 -1.3430 1.81639   2
   3 -18   0 0.07176 1.92152   7
   3 -18   0 1.43535 2.19189   3
   3 -18   0 1.71439 2.11587   4
  -3  18   0 0.07961 2.41159   3
  -3  18   0 3.27572 2.64914   1
   2 -18   0 -1.3344 1.65042   7
   2 -18   0 1.58893 2.20275   3
   2 -18   0 0.75658 1.96342   4
   2 -18   0 1.20423 1.82242   2
  -2  18   0 -1.2737 2.11034   3
  -2  18   0 -0.9917 2.48367   1
   1 -18   0 4.22228 1.99066   2
   1 -18   0 -0.4059 2.03828   4
   1 -18   0 0.55590 2.08334   7
   1 -18   0 2.98459 2.20492   3
  -1  18   0 4.11225 2.74011   1
  -1  18   0 -0.0995 2.25524   3
   0 -18   0 10.7831 2.27883   2
   0 -18   0 14.4888 2.70529   3
   0 -18   0 17.2322 2.73026   7
   0  18   0 16.5524 3.30102   3
   0  18   0 20.9323 3.66523   1
  -1 -18   0 13.3113 2.28218   2
  -1 -18   0 10.6351 2.48416   3
  -1 -18   0 9.37244 2.44216   7
   1  18   0 8.33099 3.07974   1
   1  18   0 11.8873 2.95189   3
  -2 -18   0 37.6964 3.29135   2
  -2 -18   0 51.4467 4.00514   3
  -2 -18   0 40.7785 4.08585   7
   2  18   0 50.2539 4.68925   3
   2  18   0 38.0788 4.41197   1
  -3 -18   0 14.4459 2.18932   2
  -3 -18   0 16.9414 2.51913   3
  -3 -18   0 20.7381 3.29890   7
   3  18   0 21.5835 3.74193   1
   3  18   0 14.8848 3.28335   3
  -4 -18   0 0.53116 2.16955   7
  -4 -18   0 1.16039 2.12935   6
  -4 -18   0 3.29612 1.83045   3
  -4 -18   0 -4.4712 1.50371   2
   4  18   0 4.72884 2.89709   1
   4  18   0 0.94276 2.34565   3
  -5 -18   0 -0.5963 2.18410   7
  -5 -18   0 -0.5294 1.57547   3
  -5 -18   0 -1.4021 1.56120   2
  -5 -18   0 -1.1397 1.94653   6
   5  18   0 -1.2014 2.26294   3
   5  18   0 0.61880 2.72089   1
  -6 -18   0 60.0894 4.97873   7
  -6 -18   0 64.2732 3.49863   2
  -6 -18   0 52.9812 4.18996   6
  -6 -18   0 59.9709 3.58716   3
   6  18   0 61.0176 5.46295   1
   6  18   0 56.9628 4.84643   3
  -7 -18   0 3.19801 1.50716   3
  -7 -18   0 4.68040 2.37530   6
  -7 -18   0 8.64583 2.75393   7
   7  18   0 1.00399 2.87980   1
   7  18   0 4.48272 2.64766   3
  -8 -18   0 1.56939 2.46625   7
  -8 -18   0 4.79770 2.32796   6
   8  18   0 4.87214 2.60888   3
   8  18   0 4.57008 2.97596   1
  -9 -18   0 4.45365 2.38286   6
  -9 -18   0 2.39698 2.55315   7
   9  18   0 -0.8772 2.77138   1
   9  18   0 3.35204 2.61141   3
 -10 -18   0 6.45164 2.87701   7
 -10 -18   0 7.79854 2.51840   6
  10  18   0 2.59446 3.01528   1
  10  18   0 8.33494 2.96514   3
 -11 -18   0 4.06404 2.92244   7
 -11 -18   0 13.9215 2.85648   6
  11  18   0 11.6321 3.61504   1
  11  18   0 2.93566 2.80034   3
   5 -19   0 13.4178 3.30379   3
   5 -19   0 9.33546 2.56378   2
   5 -19   0 10.4572 2.93857   4
  -5  19   0 21.4561 3.79468   1
  -5  19   0 12.2472 2.99466   3
   4 -19   0 1.91176 2.05285   2
   4 -19   0 0.54716 2.45508   3
   4 -19   0 0.68791 2.10394   7
   4 -19   0 0.11978 2.10098   4
  -4  19   0 0.19396 2.55989   1
  -4  19   0 -1.1288 2.24730   3
   3 -19   0 -1.3888 1.89055   2
   3 -19   0 -2.0890 2.01171   4
   3 -19   0 -1.0251 1.93331   7
   3 -19   0 5.01158 2.57593   3
  -3  19   0 -1.5480 2.40465   3
  -3  19   0 6.81992 2.96921   1
   2 -19   0 19.5999 3.19624   3
   2 -19   0 24.3567 3.07415   2
   2 -19   0 19.1412 3.07452   7
   2 -19   0 16.9614 3.01441   4
  -2  19   0 20.8779 3.86101   1
  -2  19   0 20.1938 3.67101   3
   1 -19   0 9.99500 2.65961   7
   1 -19   0 11.2069 2.36875   2
   1 -19   0 9.35728 2.64968   3
  -1  19   0 14.4531 3.35735   3
  -1  19   0 8.40671 3.15081   1
   0 -19   0 6.85369 2.33477   2
   0 -19   0 5.73323 2.26070   7
   0 -19   0 3.72874 2.24021   3
   0  19   0 2.14451 2.65948   3
   0  19   0 5.77234 2.99236   1
  -1 -19   0 5.56076 2.15379   2
  -1 -19   0 6.11002 2.31299   3
  -1 -19   0 12.4002 2.86055   7
   1  19   0 9.90383 2.99538   3
   1  19   0 9.16543 3.04466   1
  -2 -19   0 0.23705 1.97653   3
  -2 -19   0 -2.1355 1.53853   2
  -2 -19   0 1.00596 2.08802   7
   2  19   0 -0.9233 2.68455   1
   2  19   0 4.55682 2.71729   3
  -3 -19   0 6.96196 1.94065   2
  -3 -19   0 7.36180 2.60344   7
  -3 -19   0 7.60860 2.24267   3
   3  19   0 7.35293 3.12257   1
   3  19   0 5.93512 2.66967   3
  -4 -19   0 18.4195 2.59491   2
  -4 -19   0 20.2406 2.72051   3
  -4 -19   0 19.7944 3.22295   6
  -4 -19   0 23.5450 3.59685   7
   4  19   0 19.0351 3.58926   3
   4  19   0 14.5136 3.43836   1
  -5 -19   0 -2.0788 2.09835   6
  -5 -19   0 1.01622 1.73347   3
  -5 -19   0 -0.5764 1.44927   2
  -5 -19   0 2.02152 2.37859   7
   5  19   0 -1.9185 2.62849   1
   5  19   0 -0.7600 2.41517   3
  -6 -19   0 -1.4330 2.00085   6
  -6 -19   0 3.90766 2.49141   7
  -6 -19   0 0.97524 1.60868   3
  -6 -19   0 0.86602 1.75389   2
   6  19   0 -2.0598 2.50410   3
   6  19   0 1.87871 2.87569   1
  -7 -19   0 12.6291 3.45754   7
  -7 -19   0 16.4879 2.95925   6
   7  19   0 19.0975 3.51332   3
   7  19   0 13.8820 3.75372   1
  -8 -19   0 14.6423 3.00564   6
  -8 -19   0 14.0809 3.24249   7
   8  19   0 8.97267 3.03210   3
   8  19   0 8.90537 3.42954   1
  -9 -19   0 0.99835 2.78900   7
  -9 -19   0 3.90918 2.47710   6
   9  19   0 3.09106 2.64437   3
   9  19   0 2.65212 3.12568   1
   2 -20   0 1.58147 2.44316   3
   2 -20   0 3.99464 2.16142   7
   2 -20   0 -0.3956 1.98747   2
  -2  20   0 5.72941 2.93029   3
  -2  20   0 12.5135 3.53235   1
   1 -20   0 5.31109 2.25907   2
   1 -20   0 4.28847 2.54671   3
   1 -20   0 3.21293 2.09879   7
  -1  20   0 5.99086 2.96431   1
  -1  20   0 6.78033 2.97028   3
   0 -20   0 7.31842 2.52040   3
   0 -20   0 6.21240 2.48078   7
   0 -20   0 3.06659 2.12212   2
   0  20   0 -0.1645 2.38612   3
   0  20   0 1.02876 2.78895   1
  -1 -20   0 23.1600 3.53610   7
  -1 -20   0 21.6976 3.13970   3
  -1 -20   0 20.3204 2.90869   2
   1  20   0 19.2049 3.60916   3
   1  20   0 17.9798 3.72532   1
  -2 -20   0 33.9706 3.82260   7
  -2 -20   0 33.1009 3.37175   2
  -2 -20   0 32.5010 3.45562   3
   2  20   0 32.6586 4.17826   3
   2  20   0 35.0874 4.64891   1
  -3 -20   0 4.07230 2.06891   3
  -3 -20   0 -0.5239 2.20186   7
  -3 -20   0 -2.5728 1.73685   2
   3  20   0 -4.8685 2.10413   3
   3  20   0 4.46086 2.99976   1
  -4 -20   0 1.73320 1.91705   3
  -4 -20   0 -1.1817 1.73618   2
  -4 -20   0 0.25354 2.26233   7
  -4 -20   0 -1.4990 2.49206   6
   4  20   0 -5.4464 2.45853   3
   4  20   0 1.52547 2.89799   1
  -5 -20   0 1.67318 2.29501   6
  -5 -20   0 7.05179 2.07168   3
  -5 -20   0 -2.0191 1.43245   2
  -5 -20   0 1.93194 2.57238   7
   5  20   0 7.11612 3.27364   1
   5  20   0 6.02101 2.96102   3
  -6 -20   0 1.51299 2.53643   7
  -6 -20   0 -3.0959 2.12151   6
  -6 -20   0 -1.7303 1.65411   2
  -6 -20   0 1.21548 1.61617   3
   6  20   0 2.62594 2.87393   1
   6  20   0 0.85688 2.62988   3
  -7 -20   0 1.50224 2.53643   7
  -7 -20   0 9.16571 3.03252   6
   7  20   0 1.33413 3.04029   1
   7  20   0 4.26925 3.00131   3
   7  20  -1 -1.1442 2.45638   3
   7  20  -1 3.62505 3.19666   1
  -7 -20   1 0.72821 2.35310   6
  -7 -20   1 6.72845 2.84950   7
   6  20  -1 35.8073 4.79953   1
   6  20  -1 35.4546 4.34226   3
  -6 -20   1 39.5625 3.17653   3
  -6 -20   1 45.2646 4.91289   7
  -6 -20   1 40.1969 4.17735   6
   5  20  -1 25.8948 3.94419   3
   5  20  -1 29.2233 4.41242   1
  -5 -20   1 27.1107 3.57007   6
  -5 -20   1 30.5552 4.04374   7
  -5 -20   1 29.7874 3.02000   3
  -5 -20   1 30.8824 3.03764   2
   4  20  -1 17.9315 3.87873   1
   4  20  -1 18.1405 3.75468   3
  -4 -20   1 14.4924 3.11300   6
  -4 -20   1 23.7379 2.94240   3
  -4 -20   1 20.1688 3.52196   7
  -4 -20   1 17.6093 2.46802   2
   3  20  -1 10.1407 3.31575   1
   3  20  -1 9.95215 3.19751   3
  -3 -20   1 10.0404 3.10814   7
  -3 -20   1 13.3000 2.60575   3
  -3 -20   1 7.29484 2.13209   2
   2  20  -1 13.0390 3.31627   3
   2  20  -1 15.3009 3.62710   1
  -2 -20   1 17.4288 3.22350   7
  -2 -20   1 11.5236 2.67142   3
  -2 -20   1 14.6848 2.42337   2
   1  20  -1 4.78201 2.91886   1
   1  20  -1 -2.1020 2.46732   3
  -1 -20   1 1.08120 2.15508   3
  -1 -20   1 0.80791 1.88311   2
  -1 -20   1 -0.4640 2.31939   7
   0  20  -1 0.20883 2.66445   1
   0  20  -1 -1.3966 2.30610   3
   0 -20   1 1.49889 2.11109   2
   0 -20   1 8.53151 2.65476   3
   0 -20   1 -3.5671 2.22689   7
  -1  20  -1 4.43901 2.83677   3
  -1  20  -1 3.40256 2.92218   1
   1 -20   1 -0.6349 1.80751   2
   1 -20   1 5.56163 2.55301   3
   1 -20   1 3.61065 2.15447   7
  -2  20  -1 2.45186 2.55586   3
  -2  20  -1 3.12005 2.80567   1
   2 -20   1 -1.8759 2.03597   2
   2 -20   1 0.27947 2.18303   3
   2 -20   1 3.93971 2.51381   4
   2 -20   1 4.46894 2.26598   7
   9  19  -1 13.5941 3.25431   3
   9  19  -1 14.9381 3.82305   1
  -9 -19   1 16.5899 3.63150   7
  -9 -19   1 18.0018 3.11741   6
   8  19  -1 -0.0360 2.89824   1
   8  19  -1 1.63279 2.65258   3
  -8 -19   1 2.93434 2.16832   6
  -8 -19   1 1.83748 2.63130   7
   7  19  -1 11.9702 3.49953   1
   7  19  -1 10.5728 2.94046   3
  -7 -19   1 10.0880 3.05315   7
  -7 -19   1 7.12213 2.52483   6
   6  19  -1 52.7715 5.40418   1
   6  19  -1 56.1350 4.98764   3
  -6 -19   1 50.2626 3.41690   2
  -6 -19   1 47.7457 4.37670   6
  -6 -19   1 63.1968 5.23066   7
  -6 -19   1 57.8662 3.65901   3
   5  19  -1 -3.3198 2.50079   1
   5  19  -1 2.06230 2.56166   3
  -5 -19   1 4.50303 2.65143   7
  -5 -19   1 -1.2416 1.98439   6
  -5 -19   1 -0.9537 1.55607   2
  -5 -19   1 1.92603 1.73936   3
   4  19  -1 9.29964 2.92798   3
   4  19  -1 -0.2279 2.62337   1
  -4 -19   1 4.31533 1.96009   3
  -4 -19   1 2.73449 2.50943   7
  -4 -19   1 1.58665 1.75908   2
  -4 -19   1 -0.5345 2.06571   6
   3  19  -1 6.96797 3.09139   1
   3  19  -1 0.78811 2.69101   3
  -3 -19   1 0.84256 2.30360   7
  -3 -19   1 3.15457 2.04248   3
  -3 -19   1 1.15028 1.69992   2
   2  19  -1 1.42863 2.69447   1
   2  19  -1 6.00055 2.96153   3
  -2 -19   1 4.12544 2.58809   7
  -2 -19   1 2.27262 1.73498   2
  -2 -19   1 1.28357 2.07390   3
   1  19  -1 20.9128 3.73230   3
   1  19  -1 22.5414 3.92532   1
  -1 -19   1 21.6342 2.87849   2
  -1 -19   1 24.2199 3.20412   3
  -1 -19   1 19.8578 3.07538   7
   0  19  -1 34.0590 4.36268   1
   0  19  -1 45.4579 4.61938   3
   0 -19   1 30.6134 3.25733   2
   0 -19   1 35.1450 3.66832   7
   0 -19   1 30.4393 3.51121   3
  -1  19  -1 5.61064 2.89421   3
  -1  19  -1 6.66175 3.00241   1
   1 -19   1 8.00914 2.35706   2
   1 -19   1 9.30745 2.63348   3
   1 -19   1 3.31288 2.44515   7
   1 -19   1 9.64849 2.65507   4
  -2  19  -1 1.02123 2.69688   1
  -2  19  -1 4.17763 2.69904   3
   2 -19   1 4.76628 2.04262   2
   2 -19   1 3.95130 2.56545   3
   2 -19   1 5.35238 2.37269   4
   2 -19   1 3.52761 2.26963   7
  -3  19  -1 2.89897 2.66057   1
  -3  19  -1 -0.0138 2.45738   3
   3 -19   1 3.53765 2.01231   7
   3 -19   1 -0.3089 1.86399   2
   3 -19   1 2.53487 2.29840   4
   3 -19   1 3.18040 2.53859   3
  -4  19  -1 19.9708 3.47040   3
  -4  19  -1 22.4193 3.76467   1
   4 -19   1 19.7189 2.94358   2
   4 -19   1 19.6437 3.39317   3
   4 -19   1 17.5579 3.09768   4
   4 -19   1 21.0152 2.85723   7
  -5  19  -1 16.3008 3.51166   1
  -5  19  -1 16.0769 3.22899   3
   5 -19   1 20.8737 3.59215   3
   5 -19   1 14.7967 2.86415   2
   5 -19   1 17.8212 3.08765   4
  11  18  -1 2.10097 3.00797   1
  11  18  -1 1.48560 2.37614   3
 -11 -18   1 -0.0858 2.31300   6
 -11 -18   1 0.43759 2.67430   7
  10  18  -1 8.13555 3.27072   1
  10  18  -1 4.07114 2.71498   3
 -10 -18   1 4.45765 2.80636   7
 -10 -18   1 7.07909 2.69803   6
   9  18  -1 -2.4704 2.24949   3
   9  18  -1 -4.4828 2.62235   1
  -9 -18   1 -1.5634 1.96049   6
  -9 -18   1 -2.6087 2.25391   7
   8  18  -1 12.1320 3.42474   1
   8  18  -1 13.7264 3.21530   3
  -8 -18   1 15.0408 2.89134   6
  -8 -18   1 17.1396 3.28475   7
   7  18  -1 0.31607 2.76317   1
   7  18  -1 2.29717 2.57779   3
  -7 -18   1 1.00950 2.32540   7
  -7 -18   1 2.70111 1.46094   3
  -7 -18   1 0.60779 2.15598   6
   6  18  -1 4.40607 2.71580   3
   6  18  -1 5.98414 3.06551   1
  -6 -18   1 5.14387 2.90600   7
  -6 -18   1 3.97984 1.69190   3
  -6 -18   1 5.61487 1.67846   2
  -6 -18   1 2.80301 2.25627   6
   5  18  -1 1.04528 2.65247   1
   5  18  -1 0.46298 2.44742   3
  -5 -18   1 2.37701 2.16196   6
  -5 -18   1 4.28584 1.78610   3
  -5 -18   1 2.70614 2.56425   7
  -5 -18   1 0.26009 1.50541   2
   4  18  -1 3.00717 2.38838   3
   4  18  -1 5.57910 3.01881   1
  -4 -18   1 2.83458 1.75472   2
  -4 -18   1 -0.9671 2.42896   7
  -4 -18   1 5.66812 2.04297   3
  -4 -18   1 2.94259 2.20731   6
   3  18  -1 10.1102 3.19891   1
   3  18  -1 -1.0056 2.20626   3
  -3 -18   1 5.74336 2.07179   3
  -3 -18   1 4.49463 2.58880   7
  -3 -18   1 2.99596 1.63588   2
   2  18  -1 4.99554 2.89248   1
   2  18  -1 2.79088 2.40729   3
  -2 -18   1 1.92920 1.82073   2
  -2 -18   1 -2.4602 1.73057   3
  -2 -18   1 -0.1191 1.99165   7
   1  18  -1 69.6267 5.74385   1
   1  18  -1 72.5620 5.11596   3
  -1 -18   1 68.1762 3.92929   2
  -1 -18   1 75.4153 4.71675   3
  -1 -18   1 72.4383 4.62415   7
   0  18  -1 6.22703 2.75977   3
   0  18  -1 9.81930 3.22936   1
   0 -18   1 7.71164 2.33693   7
   0 -18   1 7.66896 2.02527   2
   0 -18   1 7.79244 2.31521   3
   0 -18   1 7.90025 2.42932   4
  -1  18  -1 25.3921 3.87903   1
  -1  18  -1 29.0201 3.96732   3
   1 -18   1 35.1002 3.61463   4
   1 -18   1 31.5581 3.49517   3
   1 -18   1 28.8228 3.35249   7
   1 -18   1 36.2588 3.41760   2
  -2  18  -1 13.8449 3.34403   1
  -2  18  -1 14.3075 3.15187   3
   2 -18   1 15.6699 2.57433   2
   2 -18   1 18.6385 3.00380   4
   2 -18   1 15.4679 2.77113   7
   2 -18   1 17.7321 3.08771   3
  -3  18  -1 3.98733 2.62601   3
  -3  18  -1 4.34414 2.58753   1
   3 -18   1 -1.3231 1.82787   7
   3 -18   1 0.73604 2.13312   4
   3 -18   1 2.93984 2.27099   3
   3 -18   1 1.96552 1.98343   2
  -4  18  -1 10.1594 3.06074   1
  -4  18  -1 7.81139 2.76631   3
   4 -18   1 6.78660 2.46818   4
   4 -18   1 10.3874 2.47285   7
   4 -18   1 9.33015 2.37963   2
   4 -18   1 10.3225 2.80116   3
  -5  18  -1 4.07805 2.43491   3
  -5  18  -1 6.37442 2.76667   1
   5 -18   1 2.83409 2.22206   4
   5 -18   1 2.61977 2.20237   2
   5 -18   1 6.97328 2.62392   3
   5 -18   1 8.53099 2.24348   7
  -6  18  -1 28.6074 3.52166   3
  -6  18  -1 21.3276 3.83556   5
   6 -18   1 23.5068 3.30364   4
   6 -18   1 27.9323 3.88793   3
   6 -18   1 23.5487 3.18109   2
  -7  18  -1 15.5881 2.87034   3
  -7  18  -1 16.0821 3.53619   5
   7 -18   1 14.7409 3.20203   3
   7 -18   1 7.87416 2.59047   4
   7 -18   1 8.49468 2.97555   2
  12  17  -1 27.0978 3.75433   3
  12  17  -1 28.7930 4.37166   1
 -12 -17   1 31.7684 4.37201   7
 -12 -17   1 32.1998 3.71876   6
  11  17  -1 21.0927 3.99538   1
  11  17  -1 22.6014 3.47796   3
 -11 -17   1 17.5637 3.57582   7
 -11 -17   1 24.1957 3.46617   6
  10  17  -1 18.3480 3.21593   3
  10  17  -1 16.6911 3.56800   1
 -10 -17   1 21.6390 3.64151   7
 -10 -17   1 12.6707 2.68754   6
   9  17  -1 3.31245 2.40490   3
   9  17  -1 1.89389 2.77184   1
  -9 -17   1 4.58577 2.23711   6
  -9 -17   1 2.23722 2.51415   7
   8  17  -1 -3.0475 2.43824   1
   8  17  -1 0.19379 2.06282   3
  -8 -17   1 4.39798 2.35635   6
  -8 -17   1 1.19726 2.37511   7
   7  17  -1 28.6396 3.62006   3
   7  17  -1 25.0852 3.89735   1
  -7 -17   1 31.5996 2.48237   3
  -7 -17   1 34.3139 3.90341   7
  -7 -17   1 26.4872 3.21160   6
   6  17  -1 2.84591 2.65695   1
   6  17  -1 4.20028 2.47776   3
  -6 -17   1 3.65757 1.52414   2
  -6 -17   1 3.04725 1.59258   3
  -6 -17   1 6.30843 2.45356   7
  -6 -17   1 0.71595 1.93545   6
   5  17  -1 4.42649 2.52446   3
   5  17  -1 7.76631 3.03980   1
  -5 -17   1 12.3175 2.62334   6
  -5 -17   1 8.79955 1.80754   2
  -5 -17   1 11.6092 2.08454   3
  -5 -17   1 9.26471 2.88645   7
   4  17  -1 -1.1230 2.37311   3
   4  17  -1 0.00253 1.91265   1
  -4 -17   1 0.53387 2.02353   7
  -4 -17   1 -0.4275 1.26802   2
  -4 -17   1 -1.0129 1.54991   3
  -4 -17   1 -0.9884 1.89238   6
   3  17  -1 4.53976 2.61434   3
   3  17  -1 11.9043 3.05910   1
  -3 -17   1 10.1920 2.19274   3
  -3 -17   1 8.31817 1.89780   2
  -3 -17   1 5.63085 2.33784   7
   2  17  -1 -1.2080 2.22247   3
   2  17  -1 -0.4961 1.95444   1
  -2 -17   1 1.19513 1.95888   3
  -2 -17   1 1.22139 2.00486   7
  -2 -17   1 1.02359 1.49328   2
   1  17  -1 3.65736 2.43471   3
   1  17  -1 3.01426 2.69754   1
  -1 -17   1 4.59174 2.15408   7
  -1 -17   1 5.62633 1.79369   2
  -1 -17   1 6.44029 2.29374   3
   0  17  -1 9.23114 2.84469   3
   0  17  -1 11.7390 3.05591   1
   0 -17   1 6.77009 1.89508   2
   0 -17   1 8.08950 2.48578   4
   0 -17   1 6.80492 2.24463   7
   0 -17   1 4.85704 2.13153   3
  -1  17  -1 3.17250 2.62852   3
  -1  17  -1 8.01896 2.92931   1
   1 -17   1 1.61385 2.04838   4
   1 -17   1 4.47714 2.13777   3
   1 -17   1 8.92131 2.21315   7
   1 -17   1 2.52182 1.77561   2
  -2  17  -1 15.4277 3.19984   3
  -2  17  -1 18.8832 3.42724   1
   2 -17   1 20.4197 2.98429   4
   2 -17   1 17.8476 2.59860   7
   2 -17   1 20.2883 2.99747   3
   2 -17   1 18.4586 2.57132   2
  -3  17  -1 18.1327 3.55691   1
  -3  17  -1 17.3397 2.95668   3
   3 -17   1 14.4032 2.63780   4
   3 -17   1 11.6266 2.58717   2
   3 -17   1 15.0783 2.94853   3
   3 -17   1 9.89569 2.40862   7
  -4  17  -1 8.17526 2.80347   1
  -4  17  -1 12.6421 2.81045   3
   4 -17   1 3.45511 2.02990   7
   4 -17   1 3.87986 2.13819   4
   4 -17   1 9.07517 2.66737   3
   4 -17   1 4.20075 2.06306   2
  -5  17  -1 28.7612 3.52470   3
  -5  17  -1 37.7640 4.31540   1
   5 -17   1 28.1249 3.05376   7
   5 -17   1 31.1630 3.79559   3
   5 -17   1 32.8280 3.59089   2
   5 -17   1 38.2325 3.70312   4
  -6  17  -1 3.47828 2.27902   3
   6 -17   1 2.82034 2.38840   3
   6 -17   1 6.05218 2.49639   4
   6 -17   1 1.01454 2.32997   2
   6 -17   1 4.49051 2.09336   7
  -7  17  -1 11.9118 3.32428   5
  -7  17  -1 12.5908 2.68395   3
   7 -17   1 14.2784 3.06689   3
   7 -17   1 7.43659 2.46273   2
   7 -17   1 19.6083 2.95267   4
  -8  17  -1 5.28009 2.89109   5
   8 -17   1 4.29751 2.65036   3
   8 -17   1 1.20260 2.13616   2
   8 -17   1 7.03639 2.63916   4
  13  16  -1 1.07523 2.25268   3
  13  16  -1 -1.0685 2.89661   1
 -13 -16   1 1.71821 2.80419   7
 -13 -16   1 -0.6629 1.94104   6
  12  16  -1 -0.0898 2.65852   1
  12  16  -1 2.15939 2.27022   3
 -12 -16   1 4.03584 2.32719   6
 -12 -16   1 2.16363 2.60450   7
  11  16  -1 23.9600 3.21103   3
  11  16  -1 15.4192 3.43047   1
 -11 -16   1 12.1706 3.25436   7
 -11 -16   1 16.6150 2.78293   6
  10  16  -1 0.88339 2.12041   3
  10  16  -1 -3.1148 2.41006   1
 -10 -16   1 -1.8985 2.04380   6
 -10 -16   1 3.53298 2.65450   7
   9  16  -1 26.7439 3.87435   1
   9  16  -1 27.9607 3.47730   3
  -9 -16   1 33.0989 3.41794   6
  -9 -16   1 30.7037 3.91128   7
   8  16  -1 16.3955 3.03162   3
   8  16  -1 22.4971 3.64638   1
  -8 -16   1 17.5421 2.71038   6
  -8 -16   1 23.3107 3.48678   7
   7  16  -1 1.08438 2.17354   3
   7  16  -1 -0.2568 2.56747   1
  -7 -16   1 0.73235 2.16336   7
  -7 -16   1 1.18044 2.01224   6
  -7 -16   1 0.22222 1.23228   3
   6  16  -1 -1.8599 1.83913   3
   6  16  -1 1.91583 2.43463   1
  -6 -16   1 0.00899 2.15224   7
  -6 -16   1 0.51025 1.32470   2
  -6 -16   1 1.86302 1.44593   3
  -6 -16   1 -0.0160 1.87471   6
   5  16  -1 76.7678 5.43313   1
   5  16  -1 69.8830 4.87235   3
  -5 -16   1 74.6051 4.61736   6
  -5 -16   1 74.3623 3.81089   3
  -5 -16   1 74.4424 3.63404   2
  -5 -16   1 68.4096 4.59014   7
   4  16  -1 99.0042 5.59329   3
   4  16  -1 95.5069 5.89654   1
  -4 -16   1 103.746 4.65811   3
  -4 -16   1 94.7000 5.16941   7
  -4 -16   1 95.6984 4.20291   2
   3  16  -1 6.47583 2.33926   3
   3  16  -1 5.90264 2.71038   1
  -3 -16   1 3.98394 1.61374   2
  -3 -16   1 6.91312 2.24141   7
  -3 -16   1 3.91272 1.83494   3
   2  16  -1 5.78914 2.33507   3
   2  16  -1 9.64421 2.79859   1
  -2 -16   1 11.3191 2.28282   3
  -2 -16   1 8.37946 2.48075   7
  -2 -16   1 6.54510 1.81958   2
   1  16  -1 6.10084 2.67037   1
   1  16  -1 -1.0988 2.10472   3
  -1 -16   1 2.91734 1.50728   2
  -1 -16   1 1.39593 1.92964   3
  -1 -16   1 1.45350 1.91666   4
  -1 -16   1 0.94647 1.76761   7
   0  16  -1 2.09256 2.06364   1
   0  16  -1 1.59860 2.41748   3
   0 -16   1 1.91431 1.97742   4
   0 -16   1 1.50371 1.75478   7
   0 -16   1 3.07596 1.95609   3
   0 -16   1 3.10493 1.64172   2
  -1  16  -1 4.27609 2.60333   1
  -1  16  -1 8.83607 2.70429   3
   1 -16   1 10.3617 2.09467   2
   1 -16   1 10.1659 2.29782   7
   1 -16   1 8.23627 2.40300   3
   1 -16   1 6.79049 2.25240   4
  -2  16  -1 2.15251 2.50092   1
  -2  16  -1 1.79115 2.18053   3
   2 -16   1 4.58400 2.28738   3
   2 -16   1 1.47756 2.01279   4
   2 -16   1 0.61710 1.97053   7
   2 -16   1 0.71897 1.66676   2
  -3  16  -1 1.93160 2.29107   3
  -3  16  -1 4.80289 2.61889   1
   3 -16   1 -1.9651 1.63880   2
   3 -16   1 0.64814 1.86022   4
   3 -16   1 2.20073 2.06681   3
   3 -16   1 2.31572 1.93792   7
  -4  16  -1 46.2414 4.57198   1
  -4  16  -1 53.9536 4.44813   3
   4 -16   1 59.7934 4.08449   4
   4 -16   1 57.1670 4.44208   3
   4 -16   1 50.7816 3.72648   7
   4 -16   1 48.3762 3.69225   2
  -5  16  -1 1.43199 2.03203   3
  -5  16  -1 1.48163 2.46129   1
   5 -16   1 0.02759 1.79440   4
   5 -16   1 0.41565 2.04740   3
   5 -16   1 -1.1513 1.61934   7
   5 -16   1 -1.9594 1.65964   2
  -6  16  -1 8.63885 2.40387   3
   6 -16   1 5.42716 2.14592   4
   6 -16   1 5.12501 2.47155   3
   6 -16   1 0.84870 1.95934   2
  -7  16  -1 43.2917 3.66842   3
  -7  16  -1 47.5742 4.70562   5
   7 -16   1 45.8509 3.98192   2
   7 -16   1 45.5616 3.91177   4
   7 -16   1 45.8417 4.27214   3
  -8  16  -1 3.39521 1.93615   3
  -8  16  -1 1.23920 2.12889   5
   8 -16   1 2.49219 2.21612   2
   8 -16   1 4.07347 2.33739   4
   8 -16   1 1.24056 2.32942   3
  -9  16  -1 2.97564 2.56971   5
   9 -16   1 2.53735 2.02315   4
   9 -16   1 5.08238 2.66394   3
   9 -16   1 3.92966 2.36471   2
  14  15  -1 -3.9253 2.62856   1
 -14 -15   1 3.71549 2.10943   6
 -14 -15   1 1.72060 3.03601   7
  13  15  -1 24.1387 3.10572   3
  13  15  -1 22.2061 3.89463   1
 -13 -15   1 30.9396 3.59546   6
 -13 -15   1 25.4604 4.00824   7
  12  15  -1 5.58469 3.00940   1
  12  15  -1 8.80050 2.45585   3
 -12 -15   1 5.79819 2.80948   7
 -12 -15   1 8.21927 2.24230   6
  11  15  -1 89.0700 4.97728   3
  11  15  -1 85.4709 5.90796   1
 -11 -15   1 94.0749 5.82372   7
 -11 -15   1 86.9338 5.03687   6
  10  15  -1 4.21778 2.21198   3
  10  15  -1 1.95867 2.63724   1
 -10 -15   1 3.20078 2.52206   7
 -10 -15   1 3.26982 2.00568   6
   9  15  -1 9.85777 2.38094   3
   9  15  -1 10.6035 2.99727   1
  -9 -15   1 11.4075 2.89876   7
  -9 -15   1 15.6982 2.54167   6
   8  15  -1 1.66744 2.41786   1
   8  15  -1 1.72315 1.92346   3
  -8 -15   1 1.81770 2.19462   7
  -8 -15   1 4.93005 1.98947   6
  -8 -15   1 -2.0985 0.82554   3
   7  15  -1 6.21209 2.39635   3
   7  15  -1 9.41227 2.79978   1
  -7 -15   1 4.25860 1.34603   3
  -7 -15   1 6.58556 2.05073   6
  -7 -15   1 2.08327 2.24199   7
   6  15  -1 4.53392 2.24738   3
   6  15  -1 2.88033 2.48659   1
  -6 -15   1 3.14601 2.12304   7
  -6 -15   1 3.35553 1.36094   2
  -6 -15   1 1.97484 1.37253   3
  -6 -15   1 4.32773 1.96060   6
   5  15  -1 77.6538 4.79760   3
   5  15  -1 72.0580 5.12613   1
  -5 -15   1 73.6868 3.49063   2
  -5 -15   1 75.5606 4.61666   7
  -5 -15   1 76.9738 3.72065   3
  -5 -15   1 82.5243 4.55439   6
   4  15  -1 61.8140 4.43656   3
   4  15  -1 61.0799 4.69833   1
  -4 -15   1 51.8389 2.90326   2
  -4 -15   1 49.7638 4.02418   7
  -4 -15   1 52.2552 3.37692   3
   3  15  -1 24.0831 3.44393   1
   3  15  -1 21.4155 2.98437   3
  -3 -15   1 25.1454 2.71316   3
  -3 -15   1 32.6898 3.27896   7
  -3 -15   1 27.0613 2.38988   2
   2  15  -1 7.26401 2.62191   1
   2  15  -1 7.44532 2.47196   3
  -2 -15   1 3.16772 1.86003   3
  -2 -15   1 5.45949 2.00436   7
  -2 -15   1 2.50883 1.51914   2
   1  15  -1 45.1114 4.18029   1
   1  15  -1 50.4568 4.20925   3
  -1 -15   1 50.2777 3.22104   2
  -1 -15   1 50.3961 3.75126   3
  -1 -15   1 52.2972 3.56648   7
  -1 -15   1 43.6601 3.61377   4
   0  15  -1 16.2144 3.06196   1
   0  15  -1 21.4983 3.12734   3
   0 -15   1 19.1536 2.71274   3
   0 -15   1 19.3942 2.54326   7
   0 -15   1 17.5854 2.17514   2
   0 -15   1 17.6047 2.57964   4
  -1  15  -1 3.73616 2.34768   3
  -1  15  -1 1.82251 2.40371   1
   1 -15   1 0.78425 1.49893   2
   1 -15   1 3.04094 2.04959   3
   1 -15   1 2.76654 1.87577   4
   1 -15   1 -0.3990 1.54992   7
  -2  15  -1 1.61840 2.33426   1
  -2  15  -1 0.69908 2.11560   3
   2 -15   1 -3.8127 1.78033   3
   2 -15   1 2.15698 1.86854   4
   2 -15   1 1.20749 1.77346   7
   2 -15   1 2.86087 1.65285   2
  -3  15  -1 49.0736 4.05133   3
  -3  15  -1 49.6165 4.44514   1
   3 -15   1 53.1080 3.97684   3
   3 -15   1 54.4743 3.80825   2
   3 -15   1 57.0095 3.85439   4
   3 -15   1 49.3928 3.51856   7
  -4  15  -1 1.47767 2.18810   1
  -4  15  -1 4.90854 2.32623   3
   4 -15   1 4.72721 1.68608   7
   4 -15   1 4.54705 1.96331   4
   4 -15   1 6.32824 2.38655   3
   4 -15   1 3.43141 1.82729   2
  -5  15  -1 19.1198 2.84085   3
  -5  15  -1 20.5586 3.37552   1
   5 -15   1 18.0859 2.65179   2
   5 -15   1 23.1407 3.17934   3
   5 -15   1 24.0359 2.88157   4
  -6  15  -1 5.80953 2.14876   3
   6 -15   1 1.87377 2.00371   2
   6 -15   1 -0.3843 1.67816   4
   6 -15   1 3.36453 2.16724   3
  -7  15  -1 9.15995 2.24191   3
  -7  15  -1 11.4116 2.75521   5
   7 -15   1 11.3429 2.52031   2
   7 -15   1 10.1835 2.71097   3
   7 -15   1 6.89098 2.16203   4
  -8  15  -1 0.66664 1.71999   3
  -8  15  -1 2.83481 2.53108   5
   8 -15   1 4.08943 1.97706   4
   8 -15   1 -0.9715 1.90352   2
   8 -15   1 0.52415 2.21792   3
  -9  15  -1 7.39580 2.79271   5
   9 -15   1 2.19380 2.35173   3
   9 -15   1 4.86638 2.04267   4
   9 -15   1 7.93598 2.48905   2
 -10  15  -1 -2.3747 2.29680   5
  10 -15   1 -1.1464 2.23138   3
  10 -15   1 -1.2055 1.74644   4
  10 -15   1 1.07461 2.14482   2
  15  14  -1 1.40760 3.23183   1
 -15 -14   1 1.52619 2.71496   7
 -15 -14   1 0.68541 2.18540   6
  14  14  -1 11.5283 3.32388   1
 -14 -14   1 18.3016 2.94840   6
 -14 -14   1 12.2319 3.28887   7
  13  14  -1 18.3060 2.76081   3
  13  14  -1 17.2268 3.64093   1
 -13 -14   1 19.6296 2.88545   6
 -13 -14   1 23.0573 3.80921   7
  12  14  -1 7.00481 2.89750   1
  12  14  -1 5.70910 2.16455   3
 -12 -14   1 11.1640 2.57660   6
 -12 -14   1 11.0173 2.97077   7
  11  14  -1 12.7350 2.45435   3
  11  14  -1 13.6547 3.11877   1
 -11 -14   1 16.1219 2.88066   6
 -11 -14   1 17.1695 3.26029   7
  10  14  -1 1.35683 2.43006   1
  10  14  -1 3.15991 2.01510   3
 -10 -14   1 6.45471 2.57905   7
 -10 -14   1 4.88972 1.99802   6
   9  14  -1 7.65432 2.22990   3
   9  14  -1 10.3919 2.83061   1
  -9 -14   1 12.4962 2.46712   6
  -9 -14   1 9.58975 2.75875   7
   8  14  -1 17.8817 2.63676   3
   8  14  -1 16.3982 3.14008   1
  -8 -14   1 26.4011 3.08023   6
  -8 -14   1 19.5833 1.43676   3
  -8 -14   1 23.4201 3.22336   7
   7  14  -1 1.54367 1.99750   3
   7  14  -1 1.16602 2.27330   1
  -7 -14   1 3.29413 1.18467   3
  -7 -14   1 2.04179 1.72887   6
  -7 -14   1 4.77270 2.25552   7
   6  14  -1 -2.0267 1.80940   3
   6  14  -1 -0.0937 2.23746   1
  -6 -14   1 4.05087 1.87936   6
  -6 -14   1 0.25181 1.93737   7
  -6 -14   1 -0.3734 1.19569   3
   5  14  -1 29.4339 3.20713   3
   5  14  -1 28.3795 3.48529   1
  -5 -14   1 30.2766 3.01303   6
  -5 -14   1 24.9275 2.12956   2
  -5 -14   1 31.6854 2.49615   3
  -5 -14   1 23.8135 3.02757   7
   4  14  -1 56.0183 4.45952   1
   4  14  -1 58.7875 4.15690   3
  -4 -14   1 65.0423 4.00780   7
  -4 -14   1 63.2234 3.13311   2
  -4 -14   1 65.4141 3.52906   3
   3  14  -1 -2.7560 2.03361   1
   3  14  -1 -1.6113 1.74896   3
  -3 -14   1 -0.0748 1.46685   3
  -3 -14   1 -0.1020 1.10557   2
  -3 -14   1 -0.1415 1.88410   7
   2  14  -1 11.7941 2.43417   3
   2  14  -1 13.3281 2.69879   1
  -2 -14   1 12.2009 1.74283   2
  -2 -14   1 9.07013 2.31362   7
  -2 -14   1 16.6415 2.23174   3
   1  14  -1 25.9604 2.99526   3
   1  14  -1 22.3291 3.10144   1
  -1 -14   1 25.4061 2.81258   4
  -1 -14   1 25.2863 2.29609   2
  -1 -14   1 30.5597 2.99986   3
  -1 -14   1 21.4619 2.73065   7
   0  14  -1 21.5243 3.15724   1
   0  14  -1 14.8570 2.61551   3
   0 -14   1 27.5567 2.91508   3
   0 -14   1 19.6723 2.57127   4
   0 -14   1 18.9610 2.51996   7
   0 -14   1 21.8695 2.23852   2
  -1  14  -1 1.46554 2.13404   1
  -1  14  -1 4.90061 2.15679   3
   1 -14   1 5.08488 1.96580   3
   1 -14   1 6.17027 1.88283   7
   1 -14   1 1.72531 1.61862   2
   1 -14   1 3.24127 1.79226   4
  -2  14  -1 25.7973 3.24309   3
  -2  14  -1 19.6814 3.17296   1
   2 -14   1 19.7151 2.35885   2
   2 -14   1 22.3243 2.71502   3
   2 -14   1 18.2962 2.31653   7
   2 -14   1 20.2987 2.54018   4
  -3  14  -1 5.39271 2.27159   3
  -3  14  -1 2.38008 2.17928   1
   3 -14   1 -0.7477 1.30719   7
   3 -14   1 0.87327 1.57140   2
   3 -14   1 0.55755 1.63997   4
   3 -14   1 -1.6320 1.80855   3
  -4  14  -1 -0.0440 2.08366   1
  -4  14  -1 -1.3408 1.76532   3
   4 -14   1 1.88237 1.67784   2
   4 -14   1 0.58663 1.83040   3
   4 -14   1 2.30988 1.68664   4
  -5  14  -1 51.2571 3.83708   3
  -5  14  -1 46.2805 4.35640   1
   5 -14   1 48.7200 3.54486   4
   5 -14   1 51.8894 3.62792   2
   5 -14   1 45.4513 3.81120   3
  -6  14  -1 14.3926 2.48664   3
   6 -14   1 17.6068 2.94930   3
   6 -14   1 12.6871 2.39317   2
   6 -14   1 15.8343 2.49913   4
  -7  14  -1 52.1874 3.55862   3
  -7  14  -1 52.0515 4.58674   5
   7 -14   1 47.9438 3.92443   2
   7 -14   1 53.7190 3.68898   4
   7 -14   1 53.8531 4.21099   3
  -8  14  -1 10.6104 2.16472   3
  -8  14  -1 15.7021 2.91723   5
   8 -14   1 13.4584 2.67789   3
   8 -14   1 11.1405 2.48561   2
   8 -14   1 12.5087 2.38903   4
  -9  14  -1 5.40691 2.57471   5
   9 -14   1 8.33256 2.38853   2
   9 -14   1 7.65108 2.30108   4
   9 -14   1 4.22364 2.37558   3
 -10  14  -1 7.94978 2.74427   5
  10 -14   1 8.55028 2.44894   2
  10 -14   1 8.72654 2.50853   4
  10 -14   1 8.12646 2.60703   3
 -11  14  -1 3.64663 2.40090   5
  11 -14   1 1.80513 2.34116   3
  11 -14   1 5.87243 2.33873   4
  11 -14   1 3.10278 2.36502   2
  15  13  -1 7.27544 3.15522   1
 -15 -13   1 10.5990 2.47456   6
 -15 -13   1 8.56295 3.04130   7
  14  13  -1 2.81402 2.82169   1
 -14 -13   1 5.73328 2.21731   6
 -14 -13   1 11.0716 3.04848   7
  13  13  -1 -0.4602 2.47147   1
  13  13  -1 1.51946 1.81356   3
 -13 -13   1 2.84202 2.08722   6
 -13 -13   1 4.78236 2.65946   7
  12  13  -1 107.636 5.03009   3
  12  13  -1 109.989 6.24127   1
 -12 -13   1 111.855 5.23530   6
 -12 -13   1 107.224 6.06635   7
  11  13  -1 4.14646 2.52133   1
  11  13  -1 3.09758 1.81634   3
 -11 -13   1 4.66409 2.48048   7
 -11 -13   1 4.65100 1.90302   6
  10  13  -1 18.5452 2.56175   3
  10  13  -1 21.0425 3.25659   1
 -10 -13   1 20.8918 2.68911   6
 -10 -13   1 24.6625 3.45153   7
   9  13  -1 -0.9439 2.16751   1
   9  13  -1 0.65289 1.73423   3
   9  13  -1 1.61635 1.49276   2
  -9 -13   1 4.15676 2.19471   7
  -9 -13   1 3.74066 1.98377   6
   8  13  -1 42.8809 4.05015   1
   8  13  -1 45.9619 3.59024   3
   8  13  -1 46.9131 2.51093   2
  -8 -13   1 52.5176 4.01656   7
  -8 -13   1 45.4932 1.82974   3
  -8 -13   1 44.2621 3.29190   6
   7  13  -1 123.842 4.27079   2
   7  13  -1 108.559 5.12704   3
   7  13  -1 111.044 5.37957   1
  -7 -13   1 117.058 5.15609   6
  -7 -13   1 117.737 5.56656   7
  -7 -13   1 121.236 3.84453   3
  -7 -13   1 113.232 3.84598   3
   6  13  -1 25.6269 2.29559   2
   6  13  -1 27.1550 2.96719   3
   6  13  -1 18.8894 2.89083   1
  -6 -13   1 19.4451 2.79215   7
  -6 -13   1 28.4260 2.74626   6
  -6 -13   1 22.4552 1.90509   3
  -6 -13   1 20.0927 1.84922   3
   5  13  -1 10.0566 2.21246   3
   5  13  -1 9.09357 2.52356   1
  -5 -13   1 7.68869 1.88463   6
  -5 -13   1 7.25597 2.10058   7
  -5 -13   1 10.3417 1.48514   2
  -5 -13   1 10.0164 1.61676   3
   4  13  -1 0.58308 1.95938   1
   4  13  -1 0.96876 1.75299   3
  -4 -13   1 -0.9409 1.24166   3
  -4 -13   1 0.98634 1.63605   7
  -4 -13   1 0.76996 1.11551   2
   3  13  -1 27.2676 3.10765   1
   3  13  -1 20.9911 2.61213   3
  -3 -13   1 31.4559 3.05302   7
  -3 -13   1 22.3751 2.32218   3
  -3 -13   1 25.1250 2.13343   2
   2  13  -1 1.55395 2.00605   1
   2  13  -1 0.14939 1.67328   3
  -2 -13   1 -0.0046 1.50240   7
  -2 -13   1 5.81198 1.71028   3
  -2 -13   1 3.54154 1.67964   4
  -2 -13   1 1.12489 1.12417   2
   1  13  -1 56.6127 3.94384   3
   1  13  -1 60.6712 3.78882   1
  -1 -13   1 57.3298 3.41005   7
  -1 -13   1 54.8634 2.95119   2
  -1 -13   1 59.0247 3.58446   3
  -1 -13   1 57.9075 3.52911   4
   0  13  -1 3.62727 1.81272   3
   0  13  -1 0.24238 1.98339   1
   0 -13   1 0.38998 1.60570   7
   0 -13   1 3.46370 1.34216   2
   0 -13   1 0.31055 1.49046   4
   0 -13   1 0.75330 1.67655   3
  -1  13  -1 50.1707 4.11362   1
  -1  13  -1 55.3067 3.77923   3
   1 -13   1 59.4178 3.55596   4
   1 -13   1 56.0213 3.26317   7
   1 -13   1 61.0037 3.77158   3
   1 -13   1 58.0562 3.19472   2
  -2  13  -1 103.763 4.84817   3
  -2  13  -1 94.2317 5.20789   1
   2 -13   1 92.8006 4.71997   3
   2 -13   1 96.7056 4.14670   7
   2 -13   1 85.7804 4.10484   2
   2 -13   1 100.128 4.49720   4
  -3  13  -1 50.2178 4.11846   1
  -3  13  -1 46.1358 3.73068   3
   3 -13   1 48.4793 3.32900   4
   3 -13   1 58.6296 3.82645   3
   3 -13   1 46.7064 3.17811   2
  -4  13  -1 3.43433 2.07290   1
  -4  13  -1 2.02211 1.87788   3
   4 -13   1 3.40478 1.68543   2
   4 -13   1 0.81263 1.53505   4
   4 -13   1 0.86825 1.92992   3
  -5  13  -1 6.83096 2.35363   1
  -5  13  -1 6.34786 2.10114   3
   5 -13   1 8.27463 1.75561   2
   5 -13   1 5.86533 2.12482   3
   5 -13   1 7.01946 1.89179   4
  -6  13  -1 17.9619 3.06550   5
  -6  13  -1 22.1600 2.61414   3
   6 -13   1 18.3521 2.45602   4
   6 -13   1 20.9335 2.88568   3
   6 -13   1 21.1994 2.69987   2
  -7  13  -1 68.7001 3.83828   3
  -7  13  -1 59.9064 4.51318   5
   7 -13   1 57.5346 3.97538   2
   7 -13   1 64.8930 4.35053   3
   7 -13   1 60.5799 3.74421   4
  -8  13  -1 22.2262 3.15285   5
  -8  13  -1 18.0817 2.22574   3
   8 -13   1 19.0581 2.78309   2
   8 -13   1 25.2982 3.11242   3
   8 -13   1 19.1512 2.75373   4
  -9  13  -1 0.26993 1.76050   3
  -9  13  -1 0.08493 2.12204   5
   9 -13   1 -0.9527 1.81566   2
   9 -13   1 1.29828 1.69223   4
   9 -13   1 2.30758 2.10712   3
 -10  13  -1 11.7970 3.02312   5
  10 -13   1 11.0181 2.61055   2
  10 -13   1 5.18134 2.11780   4
  10 -13   1 10.4143 2.42853   3
 -11  13  -1 7.70718 2.63699   5
  11 -13   1 3.82590 2.26486   2
  11 -13   1 3.31164 1.88782   4
  11 -13   1 1.39662 2.18003   3
 -12  13  -1 81.4135 5.77417   5
  12 -13   1 74.1746 5.13350   2
  12 -13   1 61.3644 4.11624   4
  12 -13   1 62.9664 4.67453   3
  16  12  -1 14.3626 3.36235   1
  15  12  -1 8.96886 3.11870   1
  14  12  -1 26.1064 3.84387   1
 -14 -12   1 28.4410 3.88543   7
 -14 -12   1 32.5659 3.32912   6
  13  12  -1 3.56049 1.74752   3
  13  12  -1 0.87051 2.44437   1
 -13 -12   1 -1.0669 2.30811   7
 -13 -12   1 1.37071 2.02947   6
  12  12  -1 5.93543 2.62511   1
  12  12  -1 1.30560 1.62738   3
 -12 -12   1 4.14075 2.10350   6
 -12 -12   1 2.77557 2.29301   7
  11  12  -1 1.53135 2.28263   1
  11  12  -1 0.28659 1.59788   3
 -11 -12   1 -0.9715 2.09365   7
 -11 -12   1 3.39476 1.75512   6
  10  12  -1 -1.7769 1.46448   3
  10  12  -1 1.48845 1.77678   1
 -10 -12   1 0.51718 1.82608   6
 -10 -12   1 3.52949 2.24230   7
   9  12  -1 66.7000 2.81940   2
   9  12  -1 74.7471 4.72593   1
   9  12  -1 58.4805 3.62023   3
  -9 -12   1 62.5641 4.39994   7
  -9 -12   1 65.8645 3.74389   6
   8  12  -1 22.9188 2.51462   3
   8  12  -1 22.9394 3.05888   1
   8  12  -1 26.4282 1.89935   2
  -8 -12   1 22.7722 0.95586   3
  -8 -12   1 23.7482 3.03126   7
  -8 -12   1 26.8461 2.69078   6
  -8 -12   1 25.1288 1.03789   3
   7  12  -1 2.32556 1.65610   3
   7  12  -1 2.71840 1.08574   2
   7  12  -1 1.39221 1.59784   1
  -7 -12   1 3.52026 0.93105   3
  -7 -12   1 0.63592 1.46003   6
  -7 -12   1 5.38014 2.05617   7
  -7 -12   1 2.00212 0.86802   3
   6  12  -1 1.59236 1.49575   1
   6  12  -1 1.79521 1.02508   2
   6  12  -1 0.83225 1.57773   3
  -6 -12   1 1.65631 1.45680   6
  -6 -12   1 1.32281 1.04340   3
  -6 -12   1 1.71689 1.79200   7
  -6 -12   1 0.04140 0.96262   3
   5  12  -1 2.89176 1.12491   2
   5  12  -1 4.01606 2.02533   1
   5  12  -1 3.39801 1.58811   3
  -5 -12   1 2.98313 1.22485   3
  -5 -12   1 2.90544 1.51921   6
  -5 -12   1 5.73737 1.32994   3
  -5 -12   1 3.47888 1.11324   2
  -5 -12   1 3.29583 1.75227   7
   4  12  -1 6.57248 1.78228   1
   4  12  -1 3.48145 1.73050   3
   4  12  -1 4.10451 1.20709   2
  -4 -12   1 3.93839 1.33767   3
  -4 -12   1 7.93381 1.93615   7
  -4 -12   1 5.05015 1.22167   2
   3  12  -1 27.3368 2.71181   3
   3  12  -1 25.5772 2.91103   1
   3  12  -1 26.2491 2.05122   2
  -3 -12   1 25.8690 2.38934   3
  -3 -12   1 23.6399 2.59695   7
  -3 -12   1 27.6654 1.94235   2
   2  12  -1 104.122 4.71959   3
   2  12  -1 101.618 5.01393   1
  -2 -12   1 102.078 4.49054   4
  -2 -12   1 111.286 3.93379   2
  -2 -12   1 106.788 4.54601   7
  -2 -12   1 110.790 4.45498   3
   1  12  -1 -0.3330 1.69263   1
   1  12  -1 0.80131 1.56866   3
  -1 -12   1 -0.4647 1.14571   2
  -1 -12   1 1.56685 1.47543   3
  -1 -12   1 1.26556 1.41494   4
  -1 -12   1 0.15600 1.30690   7
   0  12  -1 20.2527 2.49213   3
   0  12  -1 18.0479 2.64269   1
   0 -12   1 18.2300 2.20717   7
   0 -12   1 21.8765 2.36449   3
   0 -12   1 21.1022 2.32096   4
   0 -12   1 21.3121 1.98360   2
  -1  12  -1 205.867 7.44309   1
  -1  12  -1 198.371 6.99566   3
   1 -12   1 206.485 6.40677   2
   1 -12   1 190.251 6.62794   4
   1 -12   1 207.738 6.90752   3
   1 -12   1 195.165 6.49394   7
  -2  12  -1 272.950 8.69020   3
  -2  12  -1 276.542 9.06336   1
   2 -12   1 269.365 8.38729   3
   2 -12   1 256.939 8.16412   4
   2 -12   1 260.563 7.97897   2
  -3  12  -1 3.01990 1.81958   3
  -3  12  -1 -0.6013 1.79146   1
   3 -12   1 -1.0546 1.27435   2
   3 -12   1 0.44345 1.52516   3
   3 -12   1 2.63782 1.48385   4
  -4  12  -1 67.2799 4.34513   1
  -4  12  -1 66.3634 3.98513   3
   4 -12   1 74.0473 4.17412   3
   4 -12   1 68.6679 3.71063   2
   4 -12   1 76.9422 3.94793   4
  -5  12  -1 56.8809 4.11070   1
  -5  12  -1 49.4880 3.52113   3
   5 -12   1 54.3686 3.84484   3
   5 -12   1 61.9323 3.38136   2
   5 -12   1 57.6623 3.59060   4
  -6  12  -1 135.641 5.43024   3
  -6  12  -1 132.941 5.92536   5
   6 -12   1 147.157 5.73227   2
   6 -12   1 131.194 5.73347   3
   6 -12   1 143.708 5.51035   4
  -7  12  -1 10.4462 1.96560   3
  -7  12  -1 11.6387 2.62675   5
   7 -12   1 11.3185 2.40306   3
   7 -12   1 11.8486 2.26617   2
   7 -12   1 11.4091 2.23715   4
  -8  12  -1 2.52562 2.28718   5
  -8  12  -1 3.61914 1.49616   3
   8 -12   1 5.64001 1.97753   2
   8 -12   1 5.02990 1.79625   4
   8 -12   1 1.85444 1.91630   3
  -9  12  -1 4.48618 2.24284   5
  -9  12  -1 0.50828 1.20156   3
   9 -12   1 1.07474 1.62794   4
   9 -12   1 2.74982 1.92577   2
   9 -12   1 0.75786 1.91777   3
 -10  12  -1 25.9571 3.36215   5
  10 -12   1 24.7074 2.73436   4
  10 -12   1 22.4483 2.95552   3
  10 -12   1 19.9122 2.92927   2
 -11  12  -1 5.41275 2.56705   5
  11 -12   1 5.94602 2.22791   3
  11 -12   1 2.25697 1.75448   4
  11 -12   1 4.90285 2.22277   2
 -12  12  -1 19.2767 3.25136   5
  12 -12   1 19.2783 2.66703   4
  12 -12   1 21.0188 3.03015   3
  12 -12   1 12.7960 2.82076   2
 -13  12  -1 3.72980 2.75162   5
  13 -12   1 4.36192 2.31015   3
  13 -12   1 1.28824 1.80522   4
  13 -12   1 -3.1064 1.90471   2
  16  11  -1 0.94717 2.48592   1
  15  11  -1 2.79886 2.62734   1
  14  11  -1 -1.9855 2.25754   1
 -14 -11   1 6.34456 2.61498   7
 -14 -11   1 5.56871 2.11534   6
  13  11  -1 7.70500 2.70175   1
  13  11  -1 6.45599 1.72821   3
 -13 -11   1 8.57630 2.67853   7
 -13 -11   1 10.1923 2.33157   6
  12  11  -1 -0.0525 1.39929   3
  12  11  -1 -0.7770 2.11588   1
 -12 -11   1 3.14838 1.76088   6
 -12 -11   1 1.83794 2.24191   7
  11  11  -1 29.8776 3.45940   1
  11  11  -1 23.7393 2.36828   3
 -11 -11   1 18.8344 3.07492   7
 -11 -11   1 27.2494 2.79466   6
  10  11  -1 17.6170 2.86708   1
  10  11  -1 19.4516 2.20101   3
  10  11  -1 22.0236 1.76863   2
 -10 -11   1 20.3439 3.03293   7
 -10 -11   1 25.1933 2.77518   6
   9  11  -1 116.206 5.60891   1
   9  11  -1 119.698 4.66178   3
   9  11  -1 118.678 3.93267   2
  -9 -11   1 115.530 4.83315   6
  -9 -11   1 118.725 5.63325   7
   8  11  -1 30.9350 2.63336   3
   8  11  -1 26.5574 1.82364   2
   8  11  -1 24.3105 2.98491   1
  -8 -11   1 28.6940 3.13645   7
  -8 -11   1 28.6041 2.69520   6
   7  11  -1 29.3376 2.52034   3
   7  11  -1 25.2246 2.89752   1
   7  11  -1 26.2894 1.80515   2
  -7 -11   1 27.9348 1.46579   3
  -7 -11   1 27.7990 2.96468   7
  -7 -11   1 28.6020 2.63294   6
  -7 -11   1 27.0804 1.49438   3
   6  11  -1 9.15350 2.12095   1
   6  11  -1 9.39090 1.26573   2
   6  11  -1 7.68405 1.76177   3
  -6 -11   1 9.83753 1.74718   6
  -6 -11   1 10.1455 1.24194   3
  -6 -11   1 7.92163 1.13842   3
  -6 -11   1 9.67087 2.00588   7
   5  11  -1 -0.3844 0.90427   2
   5  11  -1 -1.3738 1.65788   1
   5  11  -1 0.36153 1.47969   3
  -5 -11   1 1.32675 1.06232   3
  -5 -11   1 0.26886 0.87063   2
  -5 -11   1 -1.2642 1.40133   6
  -5 -11   1 -0.3563 1.44611   7
  -5 -11   1 -0.6911 0.93990   3
   4  11  -1 62.3460 3.88475   1
   4  11  -1 59.1330 3.38612   3
   4  11  -1 68.8139 2.81177   2
  -4 -11   1 64.8601 3.02636   3
  -4 -11   1 58.0501 3.47570   7
  -4 -11   1 62.9951 2.68428   2
  -4 -11   1 63.6670 2.99157   3
  -4 -11   1 64.6235 3.27103   6
   3  11  -1 71.0411 3.78148   1
   3  11  -1 83.4294 3.11400   2
   3  11  -1 72.6275 3.86413   3
  -3 -11   1 76.9913 3.90939   3
  -3 -11   1 73.2556 3.02114   2
  -3 -11   1 75.6598 3.75680   7
  -3 -11   1 69.1452 3.34774   3
   2  11  -1 5.53697 1.26589   2
   2  11  -1 5.40145 1.61916   3
   2  11  -1 3.76468 1.57473   1
  -2 -11   1 5.79280 1.58599   7
  -2 -11   1 6.73184 1.18376   2
  -2 -11   1 3.66212 1.37074   3
  -2 -11   1 6.55124 1.60182   4
   1  11  -1 0.25352 1.74234   1
   1  11  -1 1.57503 1.10419   2
   1  11  -1 4.27191 1.65167   3
  -1 -11   1 1.52871 1.42798   4
  -1 -11   1 3.19230 1.53054   7
  -1 -11   1 3.83967 1.53606   3
  -1 -11   1 2.25535 1.07547   2
   0  11  -1 68.4571 3.82140   3
   0  11  -1 67.4887 3.69032   1
   0 -11   1 70.9688 3.49719   4
   0 -11   1 71.1321 3.11014   2
   0 -11   1 68.2785 3.31359   7
   0 -11   1 69.6570 3.47677   3
  -1  11  -1 269.726 8.70724   1
  -1  11  -1 265.761 8.35570   3
   1 -11   1 271.738 7.79725   2
   1 -11   1 274.537 8.16640   3
   1 -11   1 267.396 8.05505   4
   1 -11   1 260.607 7.82581   7
  -2  11  -1 10.9739 2.23967   1
  -2  11  -1 10.3188 2.00764   3
   2 -11   1 15.8122 2.06106   3
   2 -11   1 15.8070 1.98664   4
   2 -11   1 14.7428 1.82202   2
  -3  11  -1 23.9160 2.56787   3
  -3  11  -1 25.9682 2.84210   1
   3 -11   1 18.5455 2.25418   3
   3 -11   1 24.1481 2.30012   4
   3 -11   1 22.8763 2.20161   2
  -4  11  -1 74.5768 3.75079   3
  -4  11  -1 63.0114 4.07149   1
   4 -11   1 70.5863 3.52489   4
   4 -11   1 74.5160 3.95637   3
   4 -11   1 73.6605 3.67520   2
  -5  11  -1 100.963 4.38852   3
  -5  11  -1 88.9906 4.80781   1
   5 -11   1 89.2375 4.44337   3
   5 -11   1 92.6579 4.29107   2
   5 -11   1 94.8644 4.17576   4
  -6  11  -1 6.60653 1.75275   3
  -6  11  -1 4.70550 2.17017   5
   6 -11   1 7.18724 1.73108   4
   6 -11   1 7.35295 1.93732   2
   6 -11   1 7.52088 1.99368   3
  -7  11  -1 -1.4156 1.59196   5
  -7  11  -1 1.72288 1.39934   3
  -7  11  -1 1.64051 1.22125   3
   7 -11   1 -0.7569 1.22677   2
   7 -11   1 3.59738 1.82717   3
   7 -11   1 2.40719 1.46898   4
  -8  11  -1 -0.0115 1.64947   5
  -8  11  -1 1.68842 1.28150   3
   8 -11   1 1.14703 1.80660   2
   8 -11   1 0.04581 1.59917   4
   8 -11   1 3.03064 1.76797   3
  -9  11  -1 6.51559 2.37480   5
  -9  11  -1 3.30742 1.10098   3
   9 -11   1 6.46764 2.05396   3
   9 -11   1 2.80793 1.63511   4
   9 -11   1 5.26825 1.99077   2
 -10  11  -1 22.1690 3.16155   5
  10 -11   1 17.9123 2.82850   2
  10 -11   1 14.4569 2.50536   3
  10 -11   1 17.7622 2.57425   4
 -11  11  -1 20.6395 3.38333   5
  11 -11   1 21.7039 2.78232   3
  11 -11   1 19.3740 2.78517   2
  11 -11   1 19.0938 2.61323   4
 -12  11  -1 18.5567 3.22997   5
  12 -11   1 14.9943 2.80602   2
  12 -11   1 16.5188 2.43795   4
  12 -11   1 18.7075 2.76913   3
 -13  11  -1 8.29422 2.72902   5
  13 -11   1 8.29338 2.46664   3
  13 -11   1 13.6768 2.90288   2
  13 -11   1 14.5398 2.49257   4
 -14  11  -1 2.34953 2.88543   5
  14 -11   1 5.95690 2.20019   4
  14 -11   1 5.06611 2.49915   2
  14 -11   1 1.45741 2.06913   3
  17  10  -1 1.91007 2.92977   1
  16  10  -1 0.96015 2.44057   1
  15  10  -1 12.6254 2.97363   1
  14  10  -1 1.01848 2.20617   1
  14  10  -1 -0.9187 1.34191   2
  13  10  -1 9.34558 1.67381   3
  13  10  -1 8.69532 2.57593   1
 -13 -10   1 12.3333 2.48451   6
 -13 -10   1 11.8449 2.92942   7
  12  10  -1 33.5592 2.46577   3
  12  10  -1 33.8957 3.58793   1
 -12 -10   1 36.1640 3.78984   7
 -12 -10   1 32.1027 3.20086   6
  11  10  -1 24.3334 2.87800   1
  11  10  -1 23.9541 1.82288   2
  11  10  -1 22.4080 2.09479   3
 -11 -10   1 27.7105 3.32916   7
 -11 -10   1 26.8616 2.81834   6
  10  10  -1 1.41946 1.33067   3
  10  10  -1 1.76799 1.90602   1
  10  10  -1 -0.0493 0.82418   2
 -10 -10   1 3.53390 1.56596   6
 -10 -10   1 3.45411 2.07004   7
   9  10  -1 3.23792 1.96405   1
   9  10  -1 1.80656 1.30864   3
   9  10  -1 1.16714 0.87976   2
  -9 -10   1 1.28801 1.58609   6
  -9 -10   1 1.61244 1.82731   7
   8  10  -1 0.84539 1.26039   3
   8  10  -1 0.43321 0.82531   2
   8  10  -1 0.59962 1.73015   1
  -8 -10   1 2.59105 1.75824   7
  -8 -10   1 0.22125 1.30331   6
   7  10  -1 0.23830 0.77020   2
   7  10  -1 0.13631 1.25850   3
   7  10  -1 -2.6615 1.51466   1
  -7 -10   1 1.56298 1.38702   7
  -7 -10   1 1.52088 0.50988   3
  -7 -10   1 1.52912 0.54302   3
  -7 -10   1 0.62139 1.46011   6
   6  10  -1 2.49387 1.65052   1
   6  10  -1 4.60160 0.96496   2
   6  10  -1 3.87350 1.44239   3
  -6 -10   1 3.31294 0.86599   3
  -6 -10   1 4.08009 1.72273   7
  -6 -10   1 3.17164 0.86068   3
  -6 -10   1 2.78387 1.46519   6
   5  10  -1 62.9073 3.45029   1
   5  10  -1 66.9818 2.63764   2
   5  10  -1 58.8794 3.27537   3
  -5 -10   1 63.4458 2.69174   3
  -5 -10   1 69.5499 3.64721   7
  -5 -10   1 70.1786 3.24253   6
  -5 -10   1 68.4726 2.70127   3
  -5 -10   1 66.6418 2.61349   2
   4  10  -1 125.407 3.98742   2
   4  10  -1 120.217 5.06653   1
   4  10  -1 120.857 4.76022   3
  -4 -10   1 131.191 4.21191   3
  -4 -10   1 116.388 4.76091   7
  -4 -10   1 125.573 4.52265   6
  -4 -10   1 125.385 4.21476   3
  -4 -10   1 118.170 3.84527   2
   3  10  -1 45.5723 3.04579   3
   3  10  -1 50.8584 2.37300   2
   3  10  -1 53.4014 3.38415   1
  -3 -10   1 40.2888 2.53349   3
  -3 -10   1 47.2898 2.27788   2
  -3 -10   1 46.6867 2.62869   3
  -3 -10   1 40.0204 2.77279   7
   2  10  -1 225.221 6.31670   2
   2  10  -1 215.605 7.24091   1
   2  10  -1 195.849 6.83701   3
  -2 -10   1 224.059 6.24623   2
  -2 -10   1 224.557 6.72416   3
  -2 -10   1 217.227 6.63974   3
  -2 -10   1 235.074 6.93193   7
  -2 -10   1 220.024 6.79143   4
   1  10  -1 169.267 6.09202   1
   1  10  -1 164.253 5.14984   2
   1  10  -1 161.630 5.81028   3
  -1 -10   1 163.416 5.11399   2
  -1 -10   1 167.468 5.57935   3
  -1 -10   1 170.120 5.53115   7
  -1 -10   1 168.381 5.56791   4
   0  10  -1 125.387 5.00940   3
   0  10  -1 138.432 4.60847   2
   0  10  -1 132.323 5.32275   1
   0 -10   1 144.947 5.02197   3
   0 -10   1 134.695 4.48476   2
   0 -10   1 131.376 4.82353   4
   0 -10   1 139.473 4.75179   7
  -1  10  -1 -0.2718 1.56861   1
  -1  10  -1 2.89659 1.45705   3
  -1  10  -1 0.36934 1.20135   2
   1 -10   1 -0.0818 1.26768   4
   1 -10   1 -0.3180 1.03481   2
   1 -10   1 0.38795 1.25534   3
  -2  10  -1 261.739 7.89818   3
  -2  10  -1 253.461 8.03994   1
   2 -10   1 234.602 7.40903   4
   2 -10   1 248.410 7.33603   2
   2 -10   1 253.014 7.68812   3
  -3  10  -1 31.2677 2.95812   1
  -3  10  -1 41.3951 3.05953   3
   3 -10   1 37.1639 2.55646   2
   3 -10   1 36.1164 2.67278   3
   3 -10   1 32.3700 2.44009   4
  -4  10  -1 9.99638 2.10446   1
  -4  10  -1 11.7392 1.97784   3
   4 -10   1 8.13252 1.64310   2
   4 -10   1 10.7779 1.73767   4
   4 -10   1 9.94907 1.91404   3
  -5  10  -1 164.249 5.73506   3
  -5  10  -1 165.354 5.67768   3
  -5  10  -1 162.673 6.35060   1
   5 -10   1 173.260 5.95358   2
   5 -10   1 157.642 5.76684   3
   5 -10   1 166.831 5.64726   4
  -6  10  -1 0.39923 1.30857   3
  -6  10  -1 1.44521 1.66824   5
  -6  10  -1 -1.2983 1.02418   3
   6 -10   1 -1.8670 1.43808   3
   6 -10   1 2.67772 1.33772   4
   6 -10   1 1.84349 1.49858   2
  -7  10  -1 274.852 9.01500   5
  -7  10  -1 277.542 7.75456   3
  -7  10  -1 276.946 8.00645   3
   7 -10   1 280.722 8.46082   4
   7 -10   1 277.236 8.53183   3
   7 -10   1 276.383 8.77346   2
  -8  10  -1 49.1978 2.62558   3
  -8  10  -1 47.8003 3.85324   5
  -8  10  -1 54.2228 2.45112   3
   8 -10   1 50.6542 3.59436   2
   8 -10   1 52.8834 3.17495   4
   8 -10   1 53.7254 3.31415   3
  -9  10  -1 11.5164 2.35605   5
  -9  10  -1 7.79697 1.08541   3
   9 -10   1 8.39169 2.03848   4
   9 -10   1 7.17420 2.03136   2
   9 -10   1 12.9245 2.18233   3
 -10  10  -1 1.07840 1.89773   5
  10 -10   1 0.59562 1.47992   4
  10 -10   1 1.64955 1.93491   2
  10 -10   1 0.78882 1.68376   3
 -11  10  -1 92.9698 5.29043   5
  11 -10   1 88.9810 4.76716   2
  11 -10   1 88.2460 4.31761   4
  11 -10   1 85.2468 4.59132   3
 -12  10  -1 -1.1000 1.95423   5
  12 -10   1 2.67182 1.81100   3
  12 -10   1 -1.7547 1.88567   2
  12 -10   1 0.63726 1.76268   4
 -13  10  -1 41.8753 4.41052   5
  13 -10   1 41.1435 3.52160   3
  13 -10   1 30.2292 3.64238   2
  13 -10   1 39.4412 3.37512   4
 -14  10  -1 0.14095 2.81228   5
  14 -10   1 2.11475 2.26909   2
  14 -10   1 3.92346 2.08827   3
  14 -10   1 2.69968 1.92743   4
  17   9  -1 21.1538 3.46155   1
  16   9  -1 18.1444 3.26594   1
  15   9  -1 11.3881 2.87286   1
  14   9  -1 5.49517 1.58795   2
  14   9  -1 6.05964 2.44587   1
  13   9  -1 28.1801 3.37230   1
  13   9  -1 27.5323 2.05462   3
 -13  -9   1 23.4380 3.35742   7
  12   9  -1 40.4949 2.33420   3
  12   9  -1 40.6978 2.39458   3
  12   9  -1 47.0368 3.94988   1
  12   9  -1 36.2340 2.15300   2
 -12  -9   1 36.9039 3.14032   6
 -12  -9   1 44.5211 3.97766   7
  11   9  -1 60.9353 2.77718   3
  11   9  -1 64.5100 4.18644   1
  11   9  -1 59.0087 2.83708   3
  11   9  -1 64.8506 2.71301   2
 -11  -9   1 57.9349 3.42355   6
 -11  -9   1 55.2030 4.16623   7
  10   9  -1 66.0521 2.87360   3
  10   9  -1 64.3363 2.65349   2
  10   9  -1 62.9988 2.93216   3
  10   9  -1 56.8036 3.97789   1
 -10  -9   1 69.9655 3.70247   6
 -10  -9   1 68.3481 4.22640   7
   9   9  -1 8.48360 2.14079   1
   9   9  -1 8.00754 1.08602   2
   9   9  -1 11.5023 1.54670   3
   9   9  -1 10.0668 1.40412   3
  -9  -9   1 8.08482 2.08962   7
  -9  -9   1 11.5838 1.99187   6
   8   9  -1 72.9118 3.06051   3
   8   9  -1 71.2980 3.15338   3
   8   9  -1 74.3465 2.71111   2
   8   9  -1 73.6960 4.07420   1
  -8  -9   1 70.1179 3.95011   7
  -8  -9   1 71.6614 3.38927   6
   7   9  -1 26.9401 1.64664   2
   7   9  -1 24.1253 1.94007   3
   7   9  -1 22.5514 1.99195   3
   7   9  -1 26.2492 2.51769   1
  -7  -9   1 28.6208 2.34593   6
  -7  -9   1 23.8156 2.60760   7
   6   9  -1 0.79055 0.96598   3
   6   9  -1 1.63887 1.63653   1
   6   9  -1 0.50542 0.76984   2
   6   9  -1 0.91540 1.17267   3
  -6  -9   1 0.94503 1.16116   6
  -6  -9   1 1.62874 1.54853   7
  -6  -9   1 0.87291 0.63739   3
  -6  -9   1 2.20795 0.69724   3
   5   9  -1 49.4053 2.79968   3
   5   9  -1 55.5924 2.63230   3
   5   9  -1 54.3693 2.22909   2
   5   9  -1 53.8398 3.33735   1
  -5  -9   1 52.0166 2.26690   3
  -5  -9   1 53.5176 2.23288   3
  -5  -9   1 52.5443 3.00529   7
  -5  -9   1 55.1601 2.77770   6
   4   9  -1 20.6151 1.92499   3
   4   9  -1 17.2669 2.06031   1
   4   9  -1 20.1973 2.04192   3
   4   9  -1 19.0897 1.44375   2
  -4  -9   1 15.8825 1.52951   3
  -4  -9   1 16.3773 1.56763   3
  -4  -9   1 15.9225 1.33181   2
  -4  -9   1 17.4281 1.85828   6
  -4  -9   1 14.4470 1.98102   7
   3   9  -1 -0.0440 1.48686   1
   3   9  -1 1.63457 1.21293   3
   3   9  -1 0.61974 1.22931   3
   3   9  -1 0.50759 0.87070   2
  -3  -9   1 1.94962 1.33382   7
  -3  -9   1 2.08013 1.08226   3
  -3  -9   1 0.30119 0.82611   2
  -3  -9   1 1.10022 1.08886   3
   2   9  -1 59.8829 2.49533   2
   2   9  -1 56.6009 3.39434   1
   2   9  -1 59.9674 2.86663   4
   2   9  -1 61.4869 2.88298   3
   2   9  -1 57.9337 3.06423   3
  -2  -9   1 59.2442 2.79449   3
  -2  -9   1 59.7834 2.91705   3
  -2  -9   1 58.2669 2.48016   2
  -2  -9   1 61.5335 3.23661   1
  -2  -9   1 58.2581 2.94317   4
  -2  -9   1 60.8997 3.02093   7
   1   9  -1 53.8441 2.99585   3
   1   9  -1 56.5308 2.90789   3
   1   9  -1 55.1334 2.60708   4
   1   9  -1 57.4375 3.37606   1
   1   9  -1 60.2270 2.55798   2
  -1  -9   1 57.9046 2.47029   2
  -1  -9   1 58.7932 3.02150   7
  -1  -9   1 54.0614 2.92491   3
  -1  -9   1 54.8427 3.12926   1
  -1  -9   1 57.3040 2.87287   3
  -1  -9   1 56.2808 2.72786   4
   0   9  -1 271.998 8.33852   1
   0   9  -1 278.038 7.62392   2
   0   9  -1 266.856 7.73439   4
   0   9  -1 269.716 7.84520   3
   0   9  -1 268.753 8.13328   3
   0  -9   1 271.644 7.83630   4
   0  -9   1 269.958 7.50278   2
   0  -9   1 279.892 7.97726   3
   0  -9   1 291.976 7.81656   7
   0  -9   1 286.625 8.26187   1
   0  -9   1 270.354 7.85380   3
  -1   9  -1 159.791 5.71433   3
  -1   9  -1 168.112 5.41488   3
  -1   9  -1 157.461 5.88020   1
  -1   9  -1 183.960 5.48183   2
  -1   9  -1 166.948 5.33863   4
   1  -9   1 161.335 5.36623   4
   1  -9   1 174.693 5.87399   1
   1  -9   1 168.800 5.26003   2
   1  -9   1 174.286 5.63218   3
  -2   9  -1 68.0599 3.48219   3
  -2   9  -1 59.4325 2.89803   3
  -2   9  -1 71.8804 3.12420   2
  -2   9  -1 66.0362 3.62863   1
   2  -9   1 63.3649 2.96571   2
   2  -9   1 58.0396 2.96515   4
   2  -9   1 64.7487 3.28308   3
  -3   9  -1 44.7447 3.19691   1
  -3   9  -1 49.8125 2.88896   3
  -3   9  -1 54.9340 2.76487   3
   3  -9   1 53.2642 2.78431   4
   3  -9   1 42.4908 2.74882   3
   3  -9   1 49.4826 2.76193   2
  -4   9  -1 31.1257 2.53014   3
  -4   9  -1 36.8319 3.01374   1
  -4   9  -1 37.5464 2.33789   3
   4  -9   1 33.3034 2.35178   4
   4  -9   1 30.8684 2.46921   3
   4  -9   1 39.1003 2.59706   2
  -5   9  -1 87.5543 3.44601   3
  -5   9  -1 77.5535 3.58799   3
  -5   9  -1 83.1462 4.20190   1
   5  -9   1 81.9189 3.82647   3
   5  -9   1 88.3134 3.88424   2
   5  -9   1 85.0257 3.60942   4
  -6   9  -1 0.52508 1.15027   3
  -6   9  -1 -0.6469 1.36503   5
  -6   9  -1 1.18778 1.00477   3
   6  -9   1 1.14558 1.38422   2
   6  -9   1 -0.3283 1.30734   3
   6  -9   1 1.57084 1.35993   4
  -7   9  -1 5.11863 1.73440   5
  -7   9  -1 5.90433 1.16642   3
  -7   9  -1 6.43360 1.34959   3
   7  -9   1 3.32324 1.38809   4
   7  -9   1 5.77792 1.69558   3
   7  -9   1 3.71249 1.56946   2
  -8   9  -1 27.4135 2.94911   5
  -8   9  -1 28.2617 1.73133   3
  -8   9  -1 25.9858 1.82350   3
   8  -9   1 27.2596 2.59869   3
   8  -9   1 28.7165 2.63945   4
   8  -9   1 24.9917 2.67495   2
  -9   9  -1 1.18003 0.61597   3
  -9   9  -1 2.99216 1.76635   5
  -9   9  -1 2.37922 0.57626   3
   9  -9   1 2.19799 1.59404   3
   9  -9   1 3.00572 1.82060   2
   9  -9   1 2.26334 1.37475   4
 -10   9  -1 26.8519 3.20756   5
  10  -9   1 28.9409 2.95969   2
  10  -9   1 24.6288 2.60411   3
  10  -9   1 28.4913 2.70689   4
 -11   9  -1 7.52834 2.47631   5
  11  -9   1 1.92212 1.95158   2
  11  -9   1 6.39758 1.85322   3
  11  -9   1 7.92786 1.97774   4
 -12   9  -1 16.9260 3.26801   5
  12  -9   1 20.0122 2.47917   4
  12  -9   1 18.2680 2.89046   2
  12  -9   1 17.8444 2.41127   3
 -13   9  -1 4.23279 2.58620   5
  13  -9   1 5.53189 1.94724   4
  13  -9   1 7.72032 2.43792   2
  13  -9   1 2.75739 1.77363   3
 -14   9  -1 -0.8004 2.36391   5
  14  -9   1 3.94128 1.94611   3
  14  -9   1 5.99314 2.37015   2
  14  -9   1 4.06971 1.93058   4
 -15   9  -1 3.53022 2.74894   5
  15  -9   1 -2.5375 2.06051   2
  15  -9   1 -0.0161 1.82819   4
  17   8  -1 18.6167 2.70557   4
  17   8  -1 5.78921 2.76822   1
  16   8  -1 42.7841 4.38601   1
  15   8  -1 -0.0136 1.35648   2
  15   8  -1 -2.5715 1.97999   1
  14   8  -1 16.7407 2.87644   1
  14   8  -1 12.5311 1.88079   2
  13   8  -1 0.62936 1.33603   2
  13   8  -1 -0.5479 0.88202   3
  13   8  -1 0.43507 1.97994   1
  12   8  -1 -0.7821 0.84098   3
  12   8  -1 -1.7510 1.72433   1
  12   8  -1 -1.0619 0.85473   3
 -12  -8   1 0.98831 1.87100   7
  11   8  -1 29.2221 1.89166   3
  11   8  -1 29.9774 1.89408   3
  11   8  -1 29.6248 3.06726   1
 -11  -8   1 25.7294 2.69213   6
 -11  -8   1 32.3621 3.32992   7
  10   8  -1 156.970 4.75961   2
  10   8  -1 161.445 4.81918   3
  10   8  -1 165.697 6.27618   1
  10   8  -1 162.258 4.85031   3
 -10  -8   1 162.099 5.75326   6
 -10  -8   1 163.249 6.35794   7
   9   8  -1 81.2736 4.22297   1
   9   8  -1 88.8208 2.97598   2
   9   8  -1 78.8299 3.10501   3
   9   8  -1 90.0929 3.17485   3
  -9  -8   1 82.6721 3.80705   6
  -9  -8   1 84.2595 4.31281   7
   8   8  -1 140.278 4.42034   3
   8   8  -1 138.015 4.09087   2
   8   8  -1 135.930 5.22801   1
   8   8  -1 139.473 4.35176   3
  -8  -8   1 139.385 4.89268   6
  -8  -8   1 135.028 5.44422   7
   7   8  -1 8.03693 1.79772   1
   7   8  -1 5.81600 0.89028   2
   7   8  -1 8.22009 1.25432   3
   7   8  -1 6.99928 1.23551   3
  -7  -8   1 7.70544 1.85743   7
  -7  -8   1 5.89034 1.42272   6
   6   8  -1 405.400 11.5592   1
   6   8  -1 432.091 10.3642   2
   6   8  -1 438.926 10.8149   3
   6   8  -1 415.315 10.8251   3
  -6  -8   1 416.864 9.89472   3
  -6  -8   1 415.594 9.91117   3
  -6  -8   1 410.629 11.0468   6
  -6  -8   1 418.579 11.6037   7
   5   8  -1 54.5543 2.11290   2
   5   8  -1 53.3841 2.70024   4
   5   8  -1 52.1596 2.56215   3
   5   8  -1 55.1718 2.69903   3
   5   8  -1 60.1828 3.25530   1
  -5  -8   1 52.1992 2.09820   3
  -5  -8   1 47.7667 2.99682   7
  -5  -8   1 54.4313 2.07187   3
  -5  -8   1 54.9460 3.40359   1
  -5  -8   1 56.2004 2.69314   6
   4   8  -1 461.311 11.3849   2
   4   8  -1 478.971 11.8920   3
   4   8  -1 470.803 12.0279   3
   4   8  -1 471.698 12.0476   4
   4   8  -1 454.327 12.4589   1
   4   8  -1 473.922 12.1849   7
  -4  -8   1 459.023 12.3080   1
  -4  -8   1 476.154 11.5332   3
  -4  -8   1 468.407 11.5684   3
  -4  -8   1 447.467 11.9104   6
  -4  -8   1 473.838 11.3972   2
  -4  -8   1 445.263 12.2644   7
   3   8  -1 151.703 5.04256   3
   3   8  -1 159.986 4.97235   4
   3   8  -1 158.100 4.96031   3
   3   8  -1 157.646 4.52278   2
   3   8  -1 156.742 5.44611   1
  -3  -8   1 155.659 4.76764   3
  -3  -8   1 153.330 5.20366   7
  -3  -8   1 153.945 4.75307   3
  -3  -8   1 160.606 5.34695   1
  -3  -8   1 162.262 4.49097   2
   2   8  -1 106.596 4.32324   1
   2   8  -1 107.002 4.04322   3
   2   8  -1 103.703 3.80546   3
   2   8  -1 105.479 3.45412   2
   2   8  -1 114.354 3.90292   4
  -2  -8   1 112.963 4.22023   1
  -2  -8   1 105.036 3.42757   2
  -2  -8   1 104.766 3.83075   3
  -2  -8   1 111.638 3.91195   4
  -2  -8   1 107.498 3.83813   3
  -2  -8   1 115.488 4.04533   7
   1   8  -1 1230.05 29.1323   3
   1   8  -1 1237.38 29.0931   4
   1   8  -1 1192.37 29.3111   3
   1   8  -1 1233.26 29.5676   1
   1   8  -1 1237.31 28.7903   2
  -1  -8   1 1246.03 29.1544   3
  -1  -8   1 1195.34 29.1190   4
  -1  -8   1 1270.22 29.4713   1
  -1  -8   1 1253.25 29.1334   3
  -1  -8   1 1198.19 29.0986   7
  -1  -8   1 1185.28 28.6746   2
   0   8  -1 28.8887 2.01675   2
   0   8  -1 24.5021 2.14879   3
   0   8  -1 29.0455 2.22660   1
   0   8  -1 30.3377 2.04132   4
   0   8  -1 31.5477 2.07152   3
   0  -8   1 31.5296 2.13778   4
   0  -8   1 30.7399 2.27070   3
   0  -8   1 28.8395 1.95572   2
   0  -8   1 36.8458 2.57021   1
   0  -8   1 32.9563 2.35486   3
  -1   8  -1 230.196 6.53890   2
  -1   8  -1 220.947 7.06976   1
  -1   8  -1 222.187 6.52907   4
  -1   8  -1 232.917 6.68009   3
  -1   8  -1 227.407 6.94805   3
   1  -8   1 228.432 6.75453   3
   1  -8   1 228.164 6.45741   2
   1  -8   1 225.381 6.62853   4
   1  -8   1 238.924 6.90949   3
   1  -8   1 228.625 6.99020   1
  -2   8  -1 3.27603 1.18829   2
  -2   8  -1 3.80843 1.56444   1
  -2   8  -1 1.98310 1.12170   3
  -2   8  -1 2.09287 1.42998   3
  -2   8  -1 2.36043 1.04103   4
   2  -8   1 2.11286 1.13567   2
   2  -8   1 3.20749 1.18786   4
   2  -8   1 4.18004 1.37725   3
   2  -8   1 2.30788 1.48392   1
   2  -8   1 3.12639 1.30344   3
  -3   8  -1 260.691 8.17290   1
  -3   8  -1 270.499 7.78848   2
  -3   8  -1 279.135 7.95717   3
  -3   8  -1 265.707 7.60261   4
  -3   8  -1 271.148 7.55720   3
   3  -8   1 277.037 7.98567   3
   3  -8   1 280.163 7.79871   2
   3  -8   1 274.705 7.68845   4
   3  -8   1 275.331 7.86037   3
   3  -8   1 269.949 8.11049   1
  -4   8  -1 53.5509 2.63691   3
  -4   8  -1 56.0909 2.94354   3
  -4   8  -1 52.9446 2.67989   4
  -4   8  -1 55.8774 3.27861   1
   4  -8   1 60.7504 2.96302   2
   4  -8   1 56.4613 2.96142   3
   4  -8   1 54.7152 3.19543   1
   4  -8   1 58.9263 2.78919   4
  -5   8  -1 9.50808 1.88347   1
  -5   8  -1 11.6829 1.41386   3
  -5   8  -1 14.0185 1.98543   5
  -5   8  -1 10.5321 1.56911   3
  -5   8  -1 8.73635 1.66150   4
   5  -8   1 11.6899 1.57295   4
   5  -8   1 9.26824 1.63643   3
   5  -8   1 11.2714 1.67414   2
  -6   8  -1 98.5252 4.32454   5
  -6   8  -1 101.376 3.48195   3
  -6   8  -1 98.4998 3.72198   3
   6  -8   1 99.7813 3.99421   4
   6  -8   1 94.8072 4.05774   2
   6  -8   1 101.853 4.04529   3
  -7   8  -1 45.6973 2.26576   3
  -7   8  -1 44.1002 2.07723   3
  -7   8  -1 44.0877 3.06488   5
   7  -8   1 42.8637 2.97662   2
   7  -8   1 43.8284 2.79961   3
   7  -8   1 41.8894 2.58421   4
  -8   8  -1 -0.5641 1.67694   5
  -8   8  -1 -0.2733 0.61524   3
  -8   8  -1 0.02007 0.71915   3
   8  -8   1 1.58449 1.35576   3
   8  -8   1 -1.5911 1.37835   2
   8  -8   1 -0.6498 1.10545   4
  -9   8  -1 106.609 5.18241   5
   9  -8   1 119.167 4.65997   4
   9  -8   1 116.499 4.58663   3
   9  -8   1 122.442 5.01333   2
 -10   8  -1 2.40229 1.84030   5
  10  -8   1 0.01576 1.71405   2
  10  -8   1 -1.2148 1.19388   4
  10  -8   1 -0.9866 1.38140   3
 -11   8  -1 64.8569 4.60867   5
  11  -8   1 68.5226 3.55891   4
  11  -8   1 68.1349 3.69164   3
  11  -8   1 73.4855 4.35839   2
 -12   8  -1 24.5380 3.40802   5
  12  -8   1 21.2860 2.89636   2
  12  -8   1 27.6997 2.70290   4
  12  -8   1 29.4293 2.73383   3
 -13   8  -1 6.38465 2.70544   5
  13  -8   1 14.7025 2.33716   4
  13  -8   1 11.6093 2.61085   2
  13  -8   1 17.1469 2.28154   3
 -14   8  -1 5.08491 2.56663   5
  14  -8   1 1.42584 2.04506   2
  14  -8   1 0.33785 1.65208   4
  14  -8   1 -0.9303 1.61157   3
 -15   8  -1 -1.4276 2.64484   5
  15  -8   1 -1.1249 1.98336   2
  15  -8   1 0.24871 1.50600   4
 -16   8  -1 2.40931 3.08337   5
  16  -8   1 1.79954 2.38883   2
  16  -8   1 5.45787 2.44557   4
  17   7  -1 2.30835 2.34271   1
  17   7  -1 3.81972 2.08464   4
  16   7  -1 6.08774 2.45518   1
  16   7  -1 8.71970 2.01746   4
  16   7  -1 6.05300 1.78193   2
  15   7  -1 -2.1743 1.41255   2
  15   7  -1 -0.6446 1.96741   1
  14   7  -1 2.96806 1.47250   2
  14   7  -1 1.33164 1.94266   1
  13   7  -1 94.9734 4.94820   1
  13   7  -1 87.0671 3.81569   2
  13   7  -1 90.4694 2.92034   3
  12   7  -1 0.38519 0.74559   3
  12   7  -1 -0.7042 1.66563   1
  12   7  -1 3.18644 1.30252   2
  12   7  -1 0.20376 0.71986   3
 -12  -7   1 0.45217 1.89200   7
  11   7  -1 196.012 5.32939   3
  11   7  -1 196.388 7.05258   1
  11   7  -1 192.853 5.26306   3
 -11  -7   1 196.101 7.18594   7
 -11  -7   1 192.098 6.50938   6
  10   7  -1 124.129 3.73473   3
  10   7  -1 122.504 3.67523   3
  10   7  -1 128.050 5.23825   1
 -10  -7   1 122.169 5.30351   7
 -10  -7   1 118.548 4.62186   6
   9   7  -1 2.04562 0.78642   3
   9   7  -1 2.17758 0.79312   3
   9   7  -1 0.85779 1.52844   1
  -9  -7   1 4.02115 1.31355   6
  -9  -7   1 2.13210 1.60782   7
   8   7  -1 246.218 6.54917   3
   8   7  -1 245.158 7.10323   6
   8   7  -1 250.763 6.47190   2
   8   7  -1 246.754 6.52531   3
   8   7  -1 241.404 7.59517   1
  -8  -7   1 242.990 7.79051   7
  -8  -7   1 238.901 7.21094   6
   7   7  -1 22.4622 1.86832   6
   7   7  -1 18.7496 1.48409   3
   7   7  -1 20.4546 1.33968   2
   7   7  -1 19.1601 2.20583   1
   7   7  -1 19.9864 1.52334   3
  -7  -7   1 20.8410 1.91197   6
  -7  -7   1 21.8509 2.37619   7
   6   7  -1 4.64457 1.55186   7
   6   7  -1 6.96644 1.67400   1
   6   7  -1 4.18783 0.96814   3
   6   7  -1 4.54405 1.06315   3
   6   7  -1 3.57669 0.71029   2
   6   7  -1 7.11274 1.33619   4
  -6  -7   1 8.34540 1.52967   1
  -6  -7   1 5.61497 1.27205   6
  -6  -7   1 6.24639 1.59859   7
   5   7  -1 7.04699 1.63698   1
   5   7  -1 6.72394 1.12184   3
   5   7  -1 6.31536 0.89805   2
   5   7  -1 7.06831 1.43428   7
   5   7  -1 7.27304 1.21537   3
   5   7  -1 2.61392 1.16049   4
  -5  -7   1 4.31143 1.49000   7
  -5  -7   1 4.94420 1.16423   1
  -5  -7   1 5.43999 0.77594   3
  -5  -7   1 7.63518 0.77173   3
  -5  -7   1 6.06734 1.28766   6
   4   7  -1 13.6000 1.65080   1
   4   7  -1 11.3204 0.99903   2
   4   7  -1 7.99161 1.33826   4
   4   7  -1 9.89566 1.48338   7
   4   7  -1 9.19222 1.24113   3
   4   7  -1 8.59208 1.37077   3
  -4  -7   1 8.17843 1.54547   7
  -4  -7   1 8.73261 0.98917   2
  -4  -7   1 10.8533 1.07379   3
  -4  -7   1 11.6179 1.63952   1
  -4  -7   1 7.66057 1.30728   6
  -4  -7   1 8.89004 1.08413   3
   3   7  -1 7.72528 1.19960   3
   3   7  -1 6.90675 0.91405   2
   3   7  -1 7.15588 1.55623   1
   3   7  -1 5.03684 1.21011   3
   3   7  -1 7.64981 1.32092   4
  -3  -7   1 7.14137 1.09848   3
  -3  -7   1 8.07150 1.31657   1
  -3  -7   1 8.32105 1.13940   3
  -3  -7   1 8.35168 1.50405   7
  -3  -7   1 6.72883 0.87992   2
   2   7  -1 148.586 4.73382   3
   2   7  -1 161.217 4.41219   2
   2   7  -1 156.784 5.07657   1
   2   7  -1 155.774 4.74656   4
   2   7  -1 148.242 4.84154   3
  -2  -7   1 152.741 4.87698   7
  -2  -7   1 152.408 4.76891   4
  -2  -7   1 153.885 4.68157   3
  -2  -7   1 152.808 4.68049   3
  -2  -7   1 157.402 4.33036   2
  -2  -7   1 154.755 5.03156   1
   1   7  -1 86.3757 2.93828   2
   1   7  -1 87.0393 3.20382   4
   1   7  -1 80.5013 3.34673   3
   1   7  -1 92.6132 3.27144   3
   1   7  -1 83.3821 3.59620   1
  -1  -7   1 84.9541 3.23868   7
  -1  -7   1 90.4450 2.91787   2
  -1  -7   1 85.5625 3.33970   3
  -1  -7   1 89.1353 3.29713   4
  -1  -7   1 90.0084 3.31897   3
  -1  -7   1 91.6889 3.56823   1
   0   7  -1 8.63842 1.16458   2
   0   7  -1 8.84268 1.44365   3
   0   7  -1 11.8859 1.76418   1
   0   7  -1 7.03690 1.23837   3
   0   7  -1 10.1634 1.33125   4
   0  -7   1 8.99225 1.45718   3
   0  -7   1 9.56131 1.35077   1
   0  -7   1 8.36105 1.11015   2
   0  -7   1 10.3098 1.47728   3
   0  -7   1 8.48869 1.30651   4
  -1   7  -1 106.574 3.59614   2
  -1   7  -1 110.627 4.03304   3
  -1   7  -1 100.562 4.05884   1
  -1   7  -1 104.329 3.58979   4
  -1   7  -1 102.313 3.69747   3
   1  -7   1 107.652 3.76240   3
   1  -7   1 104.200 3.52193   2
   1  -7   1 104.643 3.81405   3
   1  -7   1 108.016 4.01449   1
   1  -7   1 95.8327 3.58452   4
  -2   7  -1 55.7030 2.64197   2
  -2   7  -1 49.8523 2.84832   3
  -2   7  -1 61.4520 2.51952   4
  -2   7  -1 57.3410 2.66417   3
  -2   7  -1 59.6046 3.13770   1
   2  -7   1 62.9368 3.08876   1
   2  -7   1 56.4163 2.59559   4
   2  -7   1 57.1011 2.72345   3
   2  -7   1 59.5300 2.66137   2
   2  -7   1 59.7775 2.96076   3
  -3   7  -1 65.9731 2.74194   4
  -3   7  -1 60.1508 2.67901   3
  -3   7  -1 60.1093 2.98331   3
  -3   7  -1 64.0343 2.88877   2
  -3   7  -1 63.6644 3.27663   1
   3  -7   1 59.3114 2.90927   3
   3  -7   1 59.8012 3.13583   1
   3  -7   1 60.7735 2.60049   4
   3  -7   1 56.6637 2.98814   3
   3  -7   1 61.0567 2.82233   2
  -4   7  -1 144.756 4.63494   4
  -4   7  -1 146.647 4.89790   2
  -4   7  -1 141.716 4.45474   3
  -4   7  -1 139.488 5.11902   1
  -4   7  -1 145.658 4.74257   3
   4  -7   1 144.279 4.86278   2
   4  -7   1 138.896 4.60804   4
   4  -7   1 146.020 4.73945   3
   4  -7   1 138.923 5.07680   1
   4  -7   1 147.589 4.88295   3
  -5   7  -1 6.11300 1.08868   3
  -5   7  -1 6.02494 1.24357   4
  -5   7  -1 5.50546 1.26966   3
  -5   7  -1 5.48601 1.65430   5
   5  -7   1 6.83412 1.27573   2
   5  -7   1 5.97538 1.39706   3
   5  -7   1 6.13816 1.24975   4
   5  -7   1 7.28251 1.72050   1
   5  -7   1 5.65273 1.47997   3
  -6   7  -1 99.3750 3.50879   3
  -6   7  -1 95.3951 4.17245   5
  -6   7  -1 101.355 3.82648   4
  -6   7  -1 103.542 3.32053   3
   6  -7   1 102.037 4.05160   3
   6  -7   1 103.081 3.90204   3
   6  -7   1 99.4055 3.75907   4
   6  -7   1 100.053 4.00012   2
  -7   7  -1 0.74858 0.68071   3
  -7   7  -1 0.51362 1.37906   5
  -7   7  -1 -0.2719 0.71651   3
   7  -7   1 2.01146 1.14570   4
   7  -7   1 2.24950 1.21380   3
   7  -7   1 -0.0575 1.31008   2
  -8   7  -1 78.7110 2.12680   3
  -8   7  -1 78.6475 2.10516   3
  -8   7  -1 73.5216 4.11349   5
   8  -7   1 75.4812 3.37689   3
   8  -7   1 75.3178 3.46314   4
   8  -7   1 80.2392 3.92485   2
  -9   7  -1 0.01208 1.44509   5
   9  -7   1 1.75056 1.19966   4
   9  -7   1 0.78876 1.20714   3
   9  -7   1 -0.0935 1.46449   2
 -10   7  -1 86.3691 4.82623   5
  10  -7   1 80.8352 4.35146   2
  10  -7   1 83.3255 3.70313   3
  10  -7   1 89.4404 3.94389   4
 -11   7  -1 3.29590 2.18874   5
  11  -7   1 1.19473 1.34450   3
  11  -7   1 0.77839 1.75239   2
  11  -7   1 1.09043 1.48068   4
 -12   7  -1 44.7432 4.31053   5
  12  -7   1 48.4851 3.05552   3
  12  -7   1 38.8822 3.63929   2
  12  -7   1 47.3802 3.20652   4
 -13   7  -1 22.1174 3.55004   5
  13  -7   1 23.7638 2.37154   3
  13  -7   1 21.6740 2.49348   4
  13  -7   1 23.4522 3.08487   2
 -14   7  -1 62.5692 4.93126   5
  14  -7   1 67.5020 3.90184   4
  14  -7   1 59.6640 4.43184   2
  14  -7   1 60.9157 3.58558   3
 -15   7  -1 20.0835 3.77028   5
  15  -7   1 20.0011 3.16787   2
  15  -7   1 21.8442 2.50708   4
 -16   7  -1 2.08250 3.06290   5
  16  -7   1 0.74632 1.65429   4
  16  -7   1 0.72175 2.28461   2
  18   6  -1 53.4789 4.45026   4
  18   6  -1 53.1677 4.93241   1
  17   6  -1 -3.9026 1.87922   1
  17   6  -1 1.22511 1.82484   4
  16   6  -1 8.83060 1.95077   2
  16   6  -1 6.98237 2.51431   1
  16   6  -1 11.1371 2.25509   4
  15   6  -1 10.9111 2.21844   4
  15   6  -1 9.25946 1.92708   2
  15   6  -1 12.7356 2.61954   1
  14   6  -1 23.0485 3.20979   1
  14   6  -1 25.3038 2.40114   2
  13   6  -1 2.25268 0.60520   3
  13   6  -1 4.78556 1.95906   1
  13   6  -1 -0.2925 1.32345   2
  12   6  -1 5.91118 0.71872   3
  12   6  -1 6.10077 1.45340   2
  12   6  -1 5.94964 0.78366   3
  12   6  -1 8.36658 2.12887   1
  11   6  -1 19.6629 2.45082   1
  11   6  -1 16.3557 1.08993   3
  11   6  -1 17.6536 1.12467   3
  11   6  -1 16.7798 1.75755   2
 -11  -6   1 19.1086 2.58389   7
  10   6  -1 1.03162 0.60888   3
  10   6  -1 0.00833 0.55054   3
  10   6  -1 1.62109 1.56804   1
 -10  -6   1 1.37642 1.59632   7
 -10  -6   1 2.55266 1.31320   6
   9   6  -1 10.6806 1.88040   1
   9   6  -1 11.3310 1.51850   6
   9   6  -1 10.2294 0.93850   3
   9   6  -1 9.17935 0.87958   3
  -9  -6   1 8.23690 1.65147   6
  -9  -6   1 9.75766 1.91908   7
   8   6  -1 22.4905 1.33155   3
   8   6  -1 22.8932 1.36216   3
   8   6  -1 23.6007 2.26904   1
   8   6  -1 27.4069 2.14029   6
  -8  -6   1 26.8535 2.58378   7
  -8  -6   1 25.7978 1.99102   6
   7   6  -1 36.4409 2.63767   7
   7   6  -1 33.5304 1.61087   3
   7   6  -1 33.1268 1.63325   3
   7   6  -1 34.4753 1.99923   6
   7   6  -1 36.6556 2.61905   1
  -7  -6   1 32.7866 2.69140   7
  -7  -6   1 33.2435 2.10228   6
  -7  -6   1 32.0944 2.38503   1
   6   6  -1 11.0149 1.10320   3
   6   6  -1 10.4177 0.94567   2
   6   6  -1 9.80805 1.55262   7
   6   6  -1 10.3502 1.66920   1
   6   6  -1 13.0500 1.39744   6
   6   6  -1 10.3854 1.07648   3
  -6  -6   1 9.72691 1.58801   1
  -6  -6   1 9.60847 1.50986   6
  -6  -6   1 8.12926 1.68453   7
   5   6  -1 5.52386 1.19334   4
   5   6  -1 5.86689 1.42764   1
   5   6  -1 6.80989 1.04272   3
   5   6  -1 7.20600 0.80200   2
   5   6  -1 5.86667 1.01571   3
   5   6  -1 8.56724 1.45346   7
  -5  -6   1 7.72617 0.57595   3
  -5  -6   1 7.11015 1.24988   6
  -5  -6   1 7.80752 0.56732   3
  -5  -6   1 6.15257 1.48599   7
  -5  -6   1 7.86605 1.24961   1
   4   6  -1 211.416 5.76586   3
   4   6  -1 207.430 6.08719   7
   4   6  -1 208.255 5.34516   2
   4   6  -1 213.315 6.31033   1
   4   6  -1 223.796 6.00098   4
   4   6  -1 205.821 5.69778   3
  -4  -6   1 205.419 5.32765   3
  -4  -6   1 201.087 5.36083   3
  -4  -6   1 209.888 5.85866   6
  -4  -6   1 207.295 6.16760   1
  -4  -6   1 205.385 6.17136   7
   3   6  -1 373.471 9.66741   4
   3   6  -1 380.110 9.55565   3
   3   6  -1 369.738 9.99100   1
   3   6  -1 385.802 9.18336   2
   3   6  -1 391.248 9.65567   3
   3   6  -1 374.828 9.76113   7
  -3  -6   1 378.771 9.33319   3
  -3  -6   1 384.825 9.59257   6
  -3  -6   1 372.794 9.15236   2
  -3  -6   1 375.086 9.89848   1
  -3  -6   1 354.736 9.83419   7
  -3  -6   1 382.849 9.37758   3
   2   6  -1 1214.68 29.0210   1
   2   6  -1 1218.53 28.7789   3
   2   6  -1 1246.09 28.3222   2
   2   6  -1 1240.74 28.7214   4
   2   6  -1 1219.21 28.6534   3
  -2  -6   1 1239.42 28.7686   4
  -2  -6   1 1182.34 28.5552   3
  -2  -6   1 1226.65 28.5688   3
  -2  -6   1 1228.55 28.2790   2
  -2  -6   1 1232.28 28.9517   1
  -2  -6   1 1202.73 28.8177   7
   1   6  -1 486.491 11.7398   2
   1   6  -1 484.225 12.1676   3
   1   6  -1 468.536 12.2977   1
   1   6  -1 489.423 12.0375   4
   1   6  -1 490.275 12.0434   3
  -1  -6   1 492.801 12.0407   3
  -1  -6   1 479.675 12.0578   7
  -1  -6   1 493.563 12.2998   1
  -1  -6   1 471.456 12.0425   4
  -1  -6   1 485.392 12.0101   3
  -1  -6   1 486.592 11.6984   2
   0   6  -1 128.153 3.83000   4
   0   6  -1 121.444 3.85676   3
   0   6  -1 122.214 4.19310   1
   0   6  -1 119.117 3.67197   2
   0  -6   1 122.659 4.03342   3
   0  -6   1 115.481 3.83868   4
   0  -6   1 122.377 3.98931   3
   0  -6   1 119.555 3.63254   2
   0  -6   1 124.868 4.14222   1
  -1   6  -1 320.062 8.34435   3
  -1   6  -1 316.444 8.67120   1
  -1   6  -1 312.068 8.54873   3
  -1   6  -1 327.251 8.29484   2
  -1   6  -1 306.386 8.24888   4
   1  -6   1 325.012 8.62955   1
   1  -6   1 315.893 8.33972   4
   1  -6   1 324.135 8.53481   3
   1  -6   1 327.685 8.26731   2
   1  -6   1 319.740 8.40578   3
  -2   6  -1 49.7570 2.34200   2
  -2   6  -1 49.9960 2.23466   3
  -2   6  -1 46.8713 2.64507   1
  -2   6  -1 48.3509 2.20136   4
  -2   6  -1 48.4762 2.41718   3
   2  -6   1 48.1800 2.40888   3
   2  -6   1 47.1458 2.56749   1
   2  -6   1 47.4422 2.31675   3
   2  -6   1 47.6922 2.25758   4
   2  -6   1 44.8063 2.21977   2
  -3   6  -1 251.319 7.05512   4
  -3   6  -1 268.413 7.59378   1
  -3   6  -1 263.563 7.29034   2
  -3   6  -1 259.102 7.24815   3
  -3   6  -1 254.178 7.00869   3
   3  -6   1 267.176 7.23702   3
   3  -6   1 256.754 7.23187   2
   3  -6   1 275.046 7.39250   3
   3  -6   1 253.741 7.07348   4
   3  -6   1 267.134 7.50177   1
  -4   6  -1 129.295 4.67269   1
  -4   6  -1 140.565 4.50912   2
  -4   6  -1 127.291 4.24977   3
  -4   6  -1 135.805 4.04481   3
  -4   6  -1 130.479 4.22899   4
   4  -6   1 132.413 4.67346   1
   4  -6   1 126.949 4.21605   4
   4  -6   1 129.771 4.44554   3
   4  -6   1 131.019 4.30123   3
   4  -6   1 129.374 4.38827   2
  -5   6  -1 359.340 8.90596   3
  -5   6  -1 350.299 9.74392   5
  -5   6  -1 338.244 9.28806   4
  -5   6  -1 356.270 9.08611   3
  -5   6  -1 353.625 9.64718   2
   5  -6   1 348.155 9.43475   3
   5  -6   1 347.856 9.60421   2
   5  -6   1 360.410 9.86910   1
   5  -6   1 352.856 9.28967   4
   5  -6   1 347.088 9.25619   3
  -6   6  -1 152.953 4.90250   4
  -6   6  -1 143.906 5.25945   5
  -6   6  -1 155.484 4.40952   3
  -6   6  -1 153.249 4.26611   3
   6  -6   1 155.795 4.92005   4
   6  -6   1 153.440 4.84813   3
   6  -6   1 156.364 5.41834   1
   6  -6   1 147.070 5.20167   2
   6  -6   1 151.143 4.99004   3
  -7   6  -1 66.5333 2.09325   3
  -7   6  -1 68.6033 2.06206   3
  -7   6  -1 65.9641 2.99838   4
  -7   6  -1 63.0095 3.39263   5
   7  -6   1 70.2996 3.10737   3
   7  -6   1 61.4169 3.41461   1
   7  -6   1 62.4725 2.99488   4
   7  -6   1 69.8744 2.96368   3
   7  -6   1 63.7497 3.32022   2
  -8   6  -1 14.2268 2.11756   5
   8  -6   1 13.3505 1.59829   4
   8  -6   1 16.0017 1.82829   3
   8  -6   1 15.6003 1.96620   2
   8  -6   1 10.4620 1.52265   3
  -9   6  -1 2.77985 1.61797   5
   9  -6   1 1.68820 1.25534   3
   9  -6   1 4.23156 1.38963   4
   9  -6   1 3.05727 1.22250   3
   9  -6   1 0.84891 1.50619   2
 -10   6  -1 3.80266 2.05754   5
  10  -6   1 1.31433 1.18668   3
  10  -6   1 1.24499 1.36782   4
  10  -6   1 2.27417 1.62295   2
 -11   6  -1 14.0841 2.72865   5
  11  -6   1 15.6968 2.04251   4
  11  -6   1 10.6324 2.18037   2
  11  -6   1 11.8724 1.68603   3
 -12   6  -1 61.7059 4.41128   5
  12  -6   1 66.7723 3.62152   4
  12  -6   1 65.0548 4.14323   2
  12  -6   1 62.5154 3.16040   3
 -13   6  -1 14.1683 2.91233   5
  13  -6   1 15.1185 2.64526   2
  13  -6   1 13.2520 1.84942   3
  13  -6   1 13.3399 2.13567   4
 -14   6  -1 7.23708 2.94953   5
  14  -6   1 14.7256 2.10249   4
  14  -6   1 9.02428 2.43951   2
  14  -6   1 10.6182 1.84464   3
 -15   6  -1 11.2090 3.40589   5
  15  -6   1 11.4863 2.68179   2
  15  -6   1 10.6346 2.13752   4
  16  -6   1 -0.0690 2.18294   2
  16  -6   1 1.27236 1.70718   4
  18   5  -1 -2.3872 2.40737   1
  17   5  -1 2.17951 2.50271   1
  17   5  -1 3.86473 1.84288   2
  17   5  -1 7.26139 2.13746   4
  16   5  -1 8.01206 2.48152   1
  16   5  -1 6.61976 1.84626   2
  16   5  -1 10.1840 2.26853   4
  15   5  -1 49.0946 4.11350   1
  15   5  -1 43.2667 3.18490   2
  15   5  -1 46.1536 3.44562   4
  14   5  -1 1.92062 1.86559   1
  14   5  -1 1.13115 1.37005   4
  14   5  -1 2.27757 1.45441   2
  13   5  -1 5.37185 0.45156   3
  13   5  -1 4.38095 1.47155   2
  13   5  -1 6.33083 2.04578   1
  12   5  -1 12.2503 1.71485   2
  12   5  -1 16.6495 2.37868   1
  12   5  -1 17.0358 0.68151   3
  12   5  -1 14.0448 0.67816   3
  11   5  -1 -0.1773 1.47629   1
  11   5  -1 2.08711 0.39574   3
  11   5  -1 3.61233 1.29477   2
  11   5  -1 3.58600 0.40195   3
  10   5  -1 43.2089 2.38301   2
  10   5  -1 44.8419 1.34322   3
  10   5  -1 45.6637 1.38252   3
  10   5  -1 43.9209 3.05136   1
 -10  -5   1 45.1334 3.13593   7
   9   5  -1 3.04012 0.46652   3
   9   5  -1 3.64047 0.50843   3
   9   5  -1 3.41226 1.45930   1
   9   5  -1 3.94465 1.27921   6
  -9  -5   1 2.22418 1.55739   7
   8   5  -1 17.7908 2.05867   1
   8   5  -1 17.6683 0.93514   3
   8   5  -1 18.0368 1.72281   6
   8   5  -1 18.1191 0.96639   3
  -8  -5   1 18.9613 2.21603   7
  -8  -5   1 21.7323 1.98743   6
   7   5  -1 21.7643 1.17224   3
   7   5  -1 23.9550 2.17695   1
   7   5  -1 27.0564 1.78988   6
   7   5  -1 25.7051 2.18854   7
   7   5  -1 23.8318 1.15563   3
  -7  -5   1 26.8783 1.93851   1
  -7  -5   1 24.5104 1.82962   6
  -7  -5   1 24.3089 2.31413   7
   6   5  -1 5.83289 1.35942   7
   6   5  -1 7.87157 0.83619   3
   6   5  -1 7.95365 1.25769   6
   6   5  -1 7.39930 0.79214   3
   6   5  -1 5.83186 1.43661   1
  -6  -5   1 6.26334 1.52368   7
  -6  -5   1 5.64600 1.31442   1
  -6  -5   1 6.79884 1.28292   6
   5   5  -1 68.6146 2.53341   6
   5   5  -1 69.3339 2.24861   3
   5   5  -1 64.3530 2.24476   3
   5   5  -1 66.5307 2.13306   2
   5   5  -1 68.3644 2.88833   7
   5   5  -1 62.8230 2.94965   1
  -5  -5   1 66.8285 2.90062   1
  -5  -5   1 61.7189 2.54036   6
  -5  -5   1 69.0642 2.93066   7
   4   5  -1 3.64693 1.07295   7
   4   5  -1 2.08417 0.76009   3
   4   5  -1 3.29010 1.17884   1
   4   5  -1 2.59682 0.93832   4
   4   5  -1 2.95892 0.78401   3
   4   5  -1 1.78626 0.53607   2
  -4  -5   1 3.46062 0.54414   3
  -4  -5   1 1.69086 0.85418   6
  -4  -5   1 2.44713 1.05161   1
  -4  -5   1 2.49667 0.49635   3
  -4  -5   1 2.32898 1.17899   7
   3   5  -1 4.96935 0.62559   2
   3   5  -1 5.71140 0.93641   3
   3   5  -1 4.57801 1.08156   7
   3   5  -1 4.15884 0.99562   4
   3   5  -1 5.72633 1.22539   1
   3   5  -1 7.42230 1.04066   3
  -3  -5   1 3.53138 0.64422   2
  -3  -5   1 5.11709 0.99899   7
  -3  -5   1 5.67423 1.16040   1
  -3  -5   1 5.01438 0.80712   3
  -3  -5   1 5.11727 0.75160   3
  -3  -5   1 5.21924 0.93839   6
   2   5  -1 51.6115 1.80913   2
   2   5  -1 59.3494 2.25116   3
   2   5  -1 50.3354 2.16800   4
   2   5  -1 54.4589 2.33156   1
   2   5  -1 52.4084 2.20307   3
  -2  -5   1 52.5801 2.23914   4
  -2  -5   1 47.5552 2.18290   1
  -2  -5   1 53.1478 2.32452   7
  -2  -5   1 51.1547 2.10737   3
  -2  -5   1 55.8497 1.81173   2
   1   5  -1 9.73571 1.29719   3
   1   5  -1 9.54046 0.93123   2
   1   5  -1 9.43083 1.10625   4
   1   5  -1 8.00000 1.38666   1
   1   5  -1 9.73318 1.15788   3
  -1  -5   1 7.07530 0.95424   4
  -1  -5   1 8.69643 1.19602   3
  -1  -5   1 9.02242 1.15087   1
  -1  -5   1 9.29170 1.17545   7
  -1  -5   1 7.57800 0.86001   2
  -1  -5   1 9.37554 1.17799   3
   0   5  -1 8.64734 1.08981   4
   0   5  -1 7.53428 1.36015   1
   0   5  -1 8.97316 1.14783   3
   0   5  -1 8.12330 1.25004   3
   0   5  -1 7.74324 0.94575   2
   0  -5   1 8.46144 1.17645   3
   0  -5   1 9.33963 0.97604   2
   0  -5   1 8.52559 1.20567   3
   0  -5   1 11.1713 1.39064   1
   0  -5   1 8.34861 1.10931   4
  -1   5  -1 5.49366 1.24709   3
  -1   5  -1 3.99541 1.19001   1
  -1   5  -1 3.89310 0.90930   2
  -1   5  -1 2.61639 0.98830   3
  -1   5  -1 3.62585 0.90505   4
   1  -5   1 3.31600 1.13507   1
   1  -5   1 4.34130 0.91470   2
   1  -5   1 3.02416 1.05568   3
   1  -5   1 2.89356 0.89045   4
   1  -5   1 2.85676 1.07360   3
  -2   5  -1 153.323 4.76425   1
  -2   5  -1 156.877 4.53589   2
  -2   5  -1 151.043 4.39780   3
  -2   5  -1 153.694 4.40310   4
  -2   5  -1 154.142 4.60605   3
   2  -5   1 150.204 4.40794   4
   2  -5   1 145.140 4.50752   3
   2  -5   1 143.771 4.44392   2
   2  -5   1 154.395 4.57517   3
   2  -5   1 150.487 4.69329   1
  -3   5  -1 574.516 14.1751   4
  -3   5  -1 590.918 14.3854   2
  -3   5  -1 571.988 14.5359   1
  -3   5  -1 574.154 14.0561   3
  -3   5  -1 583.418 14.2422   3
   3  -5   1 584.771 14.3705   2
   3  -5   1 576.819 14.4927   1
   3  -5   1 590.783 14.3643   3
   3  -5   1 583.935 14.2052   4
   3  -5   1 594.225 14.2565   3
  -4   5  -1 309.029 7.89221   3
  -4   5  -1 306.836 7.71213   3
  -4   5  -1 312.724 8.30392   5
  -4   5  -1 302.282 8.21906   2
  -4   5  -1 299.901 7.97664   4
   4  -5   1 305.207 7.96543   4
   4  -5   1 298.200 8.03984   3
   4  -5   1 295.532 8.17891   2
   4  -5   1 302.458 7.95637   3
   4  -5   1 298.934 8.32464   1
  -5   5  -1 131.976 4.73581   5
  -5   5  -1 138.366 3.87126   3
  -5   5  -1 132.506 4.32058   4
  -5   5  -1 131.223 4.58114   2
  -5   5  -1 134.444 3.98204   3
   5  -5   1 143.089 4.30602   3
   5  -5   1 140.826 4.41795   3
   5  -5   1 145.073 4.79115   1
   5  -5   1 137.124 4.30722   4
   5  -5   1 134.829 4.60909   2
  -6   5  -1 117.667 3.99913   4
  -6   5  -1 117.515 3.26291   3
  -6   5  -1 123.453 4.44008   5
  -6   5  -1 122.984 4.33868   2
  -6   5  -1 115.126 3.18292   3
   6  -5   1 111.800 4.28599   2
   6  -5   1 112.672 3.90559   4
   6  -5   1 119.546 4.44181   1
   6  -5   1 118.064 3.85046   3
   6  -5   1 115.208 3.96859   3
  -7   5  -1 2.19002 1.49115   5
  -7   5  -1 3.53543 1.19897   4
   7  -5   1 0.71422 1.04500   3
   7  -5   1 1.13750 1.28157   2
   7  -5   1 2.03753 1.32643   1
   7  -5   1 1.43761 1.00515   4
   7  -5   1 2.71738 1.01670   3
  -8   5  -1 0.86917 1.04707   4
  -8   5  -1 -0.3357 1.31838   5
   8  -5   1 0.91413 1.03752   3
   8  -5   1 1.86907 1.04122   4
   8  -5   1 1.57591 0.98589   3
   8  -5   1 -0.3613 1.29134   2
  -9   5  -1 20.0555 2.52080   5
   9  -5   1 20.5519 2.26974   2
   9  -5   1 24.6693 2.12461   4
   9  -5   1 22.9213 1.89132   3
   9  -5   1 22.2940 1.75780   3
 -10   5  -1 51.1389 3.54686   5
  10  -5   1 52.5772 2.89268   4
  10  -5   1 48.9114 3.26736   2
  10  -5   1 47.6737 2.47802   3
  10  -5   1 45.8086 2.61568   3
 -11   5  -1 27.6926 3.26590   5
  11  -5   1 29.2339 2.28334   3
  11  -5   1 26.8341 2.38626   4
  11  -5   1 24.8349 1.98790   3
  11  -5   1 26.9399 2.81015   2
 -12   5  -1 54.9593 4.58879   5
  12  -5   1 49.1620 3.14870   4
  12  -5   1 49.2783 2.67112   3
  12  -5   1 52.3346 3.68517   2
 -13   5  -1 16.1606 3.02737   5
  13  -5   1 17.3947 1.87103   3
  13  -5   1 21.8024 2.82106   2
  13  -5   1 19.2174 2.34337   4
 -14   5  -1 4.76337 2.60179   5
  14  -5   1 4.54220 1.52538   3
  14  -5   1 2.97660 2.01166   2
  14  -5   1 0.51117 1.54821   4
  15  -5   1 1.46157 2.00738   2
  15  -5   1 1.59876 1.67281   4
  16  -5   1 3.19755 2.16036   2
  16  -5   1 1.24450 1.79187   4
  17  -5   1 3.95206 2.31104   2
  17  -5   1 3.34034 2.85796   4
  18   4  -1 -1.4792 2.03766   1
  17   4  -1 3.07016 2.54737   1
  17   4  -1 2.97861 1.84290   2
  17   4  -1 6.28125 2.08192   4
  16   4  -1 9.69478 2.48090   1
  16   4  -1 8.75009 1.98001   2
  16   4  -1 6.77589 2.05352   4
  15   4  -1 4.36443 1.81341   4
  15   4  -1 2.91160 1.65594   2
  15   4  -1 2.39332 2.29706   1
  14   4  -1 -0.3456 1.38298   2
  14   4  -1 1.54384 1.56120   4
  14   4  -1 5.92829 2.01681   1
  13   4  -1 17.6624 2.05019   2
  13   4  -1 12.4346 2.38599   1
  13   4  -1 20.4117 2.32298   4
  12   4  -1 7.83571 1.57083   2
  12   4  -1 4.29149 1.79311   1
  11   4  -1 3.74783 1.31472   2
  11   4  -1 1.81780 1.54294   1
  10   4  -1 20.9078 1.81631   2
  10   4  -1 26.7470 2.56240   6
  10   4  -1 17.4642 2.18599   1
   9   4  -1 -0.2727 0.91776   2
   9   4  -1 0.58937 1.29803   1
   9   4  -1 1.60327 0.99555   6
  -9  -4   1 -0.5132 1.46281   7
   8   4  -1 205.012 6.39113   7
   8   4  -1 209.264 6.06381   6
   8   4  -1 211.328 6.56649   1
  -8  -4   1 207.594 6.56407   7
   7   4  -1 166.221 4.02386   3
   7   4  -1 175.326 5.13434   6
   7   4  -1 166.221 4.04725   3
   7   4  -1 171.879 5.43164   1
   7   4  -1 173.935 5.42490   7
  -7  -4   1 170.518 5.13809   6
  -7  -4   1 167.171 5.51587   7
   6   4  -1 24.2417 0.96653   3
   6   4  -1 21.0447 1.86593   1
   6   4  -1 23.8867 1.75190   6
   6   4  -1 22.5452 0.97905   3
   6   4  -1 25.0268 1.97922   7
  -6  -4   1 27.7633 2.18347   7
  -6  -4   1 25.5133 1.95809   1
  -6  -4   1 24.1813 1.79288   6
   5   4  -1 1.43554 0.51523   3
   5   4  -1 1.01227 0.48288   3
   5   4  -1 1.11995 1.02136   1
   5   4  -1 1.74342 0.88198   6
   5   4  -1 1.01996 1.02224   7
  -5  -4   1 -0.2919 0.95108   1
  -5  -4   1 0.50538 0.78933   6
  -5  -4   1 1.27802 1.11202   7
   4   4  -1 141.955 4.43274   1
   4   4  -1 144.123 4.03546   6
   4   4  -1 147.156 4.38925   7
   4   4  -1 142.001 3.74186   3
   4   4  -1 144.865 3.79805   3
  -4  -4   1 135.685 4.33244   1
  -4  -4   1 138.200 4.05762   6
  -4  -4   1 138.827 4.41800   7
   3   4  -1 111.058 3.17189   3
   3   4  -1 113.633 3.39486   4
   3   4  -1 110.020 2.92375   2
   3   4  -1 114.514 3.21526   3
   3   4  -1 105.202 3.52098   1
   3   4  -1 115.292 3.56059   7
  -3  -4   1 109.584 2.94970   3
  -3  -4   1 105.210 3.27192   6
  -3  -4   1 115.158 3.61136   7
  -3  -4   1 114.613 3.01035   3
  -3  -4   1 108.971 3.57589   1
   2   4  -1 419.219 9.82800   2
   2   4  -1 414.289 10.1423   3
   2   4  -1 426.463 10.2247   4
   2   4  -1 409.636 10.1098   3
   2   4  -1 424.808 10.4508   1
   2   4  -1 422.283 10.3078   7
  -2  -4   1 414.484 10.3447   7
  -2  -4   1 416.112 9.81767   2
  -2  -4   1 420.442 10.0558   3
  -2  -4   1 415.884 10.0073   3
  -2  -4   1 415.601 10.2097   4
  -2  -4   1 409.090 10.3675   1
   1   4  -1 42.8604 1.79366   4
   1   4  -1 40.0155 1.77367   3
   1   4  -1 41.0802 1.99669   3
   1   4  -1 39.5774 1.52945   2
   1   4  -1 44.3162 2.13356   1
  -1  -4   1 37.9067 1.43067   2
  -1  -4   1 40.8870 2.01371   1
  -1  -4   1 41.6850 1.78176   3
  -1  -4   1 40.4919 1.82672   4
  -1  -4   1 39.9079 1.76200   3
  -1  -4   1 37.7448 1.82759   7
   0   4  -1 1424.41 33.4216   4
   0   4  -1 1446.11 33.2978   2
   0   4  -1 1449.19 33.4652   3
   0   4  -1 1458.04 33.6355   1
   0   4  -1 1426.79 33.5475   3
   0  -4   1 1430.73 33.2764   2
   0  -4   1 1458.28 33.5246   3
   0  -4   1 1434.67 33.4460   4
   0  -4   1 1449.62 33.5883   1
   0  -4   1 1510.65 33.5082   3
  -1   4  -1 7.45549 1.23361   1
  -1   4  -1 7.50849 1.18181   3
  -1   4  -1 6.76794 0.95767   4
  -1   4  -1 6.45378 0.93405   2
  -1   4  -1 6.02872 0.94581   3
   1  -4   1 6.87272 1.19096   1
   1  -4   1 6.93581 0.95598   4
   1  -4   1 4.65390 0.88327   2
   1  -4   1 4.79400 1.05047   3
   1  -4   1 6.12800 1.10531   3
  -2   4  -1 2.86494 1.14534   1
  -2   4  -1 5.15452 0.87765   4
  -2   4  -1 5.29095 0.85889   2
  -2   4  -1 5.30595 0.94367   3
  -2   4  -1 4.17247 1.01315   3
   2  -4   1 4.42043 1.14112   1
   2  -4   1 3.39782 0.99529   3
   2  -4   1 5.08787 0.99556   2
   2  -4   1 3.36146 0.99121   3
   2  -4   1 4.12347 0.90504   4
  -3   4  -1 1.04015 1.05130   1
  -3   4  -1 3.10138 0.97740   2
  -3   4  -1 3.26259 0.95126   3
  -3   4  -1 0.44327 0.67626   3
  -3   4  -1 2.19316 0.82462   4
   3  -4   1 2.48659 1.04879   1
   3  -4   1 1.65464 0.84413   3
   3  -4   1 1.42603 1.00010   3
   3  -4   1 2.74752 0.97726   2
   3  -4   1 2.50940 0.82927   4
  -4   4  -1 11.5970 1.42656   2
  -4   4  -1 10.5020 1.03626   3
  -4   4  -1 14.2102 1.53248   5
  -4   4  -1 12.6441 1.23931   4
   4  -4   1 8.91411 1.27488   2
   4  -4   1 12.0358 1.18377   4
   4  -4   1 11.3528 1.14484   3
   4  -4   1 11.0083 1.41723   1
  -5   4  -1 419.930 9.97358   3
  -5   4  -1 413.268 10.9553   5
  -5   4  -1 416.088 10.8595   2
  -5   4  -1 428.679 9.93312   3
  -5   4  -1 419.969 10.6015   4
   5  -4   1 414.180 10.4722   3
   5  -4   1 416.028 10.8980   1
   5  -4   1 409.279 10.5175   4
   5  -4   1 415.817 10.3401   3
   5  -4   1 427.793 10.8923   2
  -6   4  -1 511.722 13.0733   2
  -6   4  -1 505.467 12.7370   4
  -6   4  -1 495.743 13.1585   5
   6  -4   1 514.599 13.1413   1
   6  -4   1 504.273 13.0553   2
   6  -4   1 509.303 12.5322   3
   6  -4   1 506.223 12.3957   3
   6  -4   1 510.043 12.6992   4
  -7   4  -1 13.6793 1.75591   2
  -7   4  -1 14.0747 1.87929   5
  -7   4  -1 16.6611 1.60247   4
   7  -4   1 13.9488 1.26070   3
   7  -4   1 19.5692 2.07173   1
   7  -4   1 15.2153 1.40016   3
   7  -4   1 13.3937 1.77421   2
   7  -4   1 13.5020 1.84289   5
   7  -4   1 14.7992 1.48433   4
  -8   4  -1 34.6305 2.28613   4
  -8   4  -1 35.9596 2.72825   5
   8  -4   1 32.5706 1.80260   3
   8  -4   1 33.4362 1.95231   3
   8  -4   1 28.0784 2.42703   2
   8  -4   1 30.7949 2.60032   5
   8  -4   1 31.6303 2.03727   4
  -9   4  -1 172.572 5.54768   4
  -9   4  -1 164.343 6.18295   5
   9  -4   1 174.360 5.88975   2
   9  -4   1 171.594 5.08693   3
   9  -4   1 168.662 4.89938   3
   9  -4   1 166.819 6.04308   5
   9  -4   1 178.709 5.47091   4
 -10   4  -1 157.757 6.34857   5
  10  -4   1 158.789 5.36672   4
  10  -4   1 148.347 4.67237   3
  10  -4   1 169.637 4.95840   3
  10  -4   1 168.148 5.94274   2
 -11   4  -1 9.01893 2.41249   5
  11  -4   1 5.32742 1.86935   2
  11  -4   1 10.2992 1.70312   4
  11  -4   1 7.37178 1.33815   3
  11  -4   1 7.35054 1.20255   3
 -12   4  -1 -1.2264 2.19936   5
  12  -4   1 3.22621 1.48578   4
  12  -4   1 -0.1545 1.10495   3
  12  -4   1 0.31724 0.96390   3
  12  -4   1 -0.6931 1.62864   2
 -13   4  -1 80.4143 5.18163   5
  13  -4   1 76.0549 3.14767   3
  13  -4   1 78.5087 4.40893   2
  13  -4   1 81.1182 3.91520   4
  14  -4   1 97.6647 4.50913   4
  14  -4   1 102.771 5.35061   2
  15  -4   1 97.5778 5.15356   2
  15  -4   1 88.4908 4.47445   4
  16  -4   1 -2.0688 1.50715   4
  16  -4   1 3.58944 2.23967   2
  17  -4   1 9.52893 2.54887   2
  17  -4   1 8.01498 2.15097   4
  18   3  -1 -2.9105 1.60997   2
  18   3  -1 -0.7554 1.99164   1
  17   3  -1 23.1320 3.43839   1
  17   3  -1 24.6999 2.81660   2
  17   3  -1 25.3719 2.86485   4
  16   3  -1 28.2845 2.81694   2
  16   3  -1 29.5302 2.91291   4
  16   3  -1 35.9769 3.67926   1
  15   3  -1 0.02634 1.84032   1
  15   3  -1 1.05315 1.55398   2
  15   3  -1 1.33105 1.61508   4
  14   3  -1 14.1363 2.14068   4
  14   3  -1 8.51510 1.82849   2
  14   3  -1 14.6067 2.37245   1
  13   3  -1 -0.4597 1.50873   1
  13   3  -1 0.43949 1.32204   2
  13   3  -1 -0.9659 1.26540   4
  12   3  -1 45.8990 2.71155   2
  12   3  -1 53.0500 3.50857   1
  12   3  -1 52.3549 3.01585   4
  11   3  -1 65.7985 3.17767   2
  11   3  -1 70.4658 3.27576   4
  11   3  -1 70.1358 3.72596   1
  10   3  -1 167.294 5.88702   1
  10   3  -1 172.283 5.51414   6
  10   3  -1 164.363 5.24597   2
   9   3  -1 123.704 4.55527   7
   9   3  -1 126.771 4.23152   2
   9   3  -1 129.793 4.36211   6
   9   3  -1 129.663 4.79592   1
   8   3  -1 33.6967 2.03054   6
   8   3  -1 33.4519 2.21719   7
   8   3  -1 31.1147 2.90345   5
   8   3  -1 32.0475 1.96395   2
   8   3  -1 31.8195 2.36316   1
  -8  -3   1 35.5939 2.46453   7
   7   3  -1 233.480 7.60454   5
   7   3  -1 240.547 6.87075   7
   7   3  -1 238.653 6.96311   1
   7   3  -1 239.894 6.60973   6
   7   3  -1 236.856 6.39777   2
  -7  -3   1 237.504 6.98010   7
   6   3  -1 363.866 9.73749   1
   6   3  -1 376.520 9.35692   6
   6   3  -1 372.226 10.4474   5
   6   3  -1 367.190 9.65337   7
  -6  -3   1 365.954 9.39875   6
  -6  -3   1 361.835 9.72902   7
   5   3  -1 269.092 6.19536   3
   5   3  -1 284.041 7.29997   7
   5   3  -1 274.026 7.35653   1
   5   3  -1 272.280 6.97922   6
   5   3  -1 262.709 6.18242   3
  -5  -3   1 265.452 7.00847   6
  -5  -3   1 256.454 7.28078   7
   4   3  -1 0.38776 0.40965   3
   4   3  -1 -0.4071 0.83013   7
   4   3  -1 0.20015 0.69393   1
   4   3  -1 0.32209 0.36556   3
   4   3  -1 1.46618 0.79791   6
  -4  -3   1 0.92707 0.99537   7
  -4  -3   1 1.32387 0.87505   1
  -4  -3   1 0.46448 0.76843   6
   3   3  -1 468.347 10.8238   3
   3   3  -1 453.212 11.3555   1
   3   3  -1 446.222 11.2877   7
   3   3  -1 455.557 10.8590   3
   3   3  -1 475.288 11.0731   6
  -3  -3   1 461.263 10.6169   3
  -3  -3   1 463.522 10.6017   3
  -3  -3   1 482.146 11.3939   1
  -3  -3   1 455.809 11.3573   7
  -3  -3   1 462.038 11.0686   6
   2   3  -1 280.717 6.78083   3
   2   3  -1 272.651 7.10993   1
   2   3  -1 270.456 6.53743   2
   2   3  -1 274.535 6.89269   4
   2   3  -1 272.577 6.78447   3
   2   3  -1 286.207 7.04510   7
  -2  -3   1 280.913 6.71949   3
  -2  -3   1 279.838 6.83848   6
  -2  -3   1 270.705 6.65817   3
  -2  -3   1 281.921 7.09688   1
  -2  -3   1 288.412 7.08782   7
  -2  -3   1 273.327 6.54750   2
   1   3  -1 248.059 6.20418   3
   1   3  -1 247.921 6.20133   3
   1   3  -1 244.035 6.35377   1
   1   3  -1 246.065 6.19834   4
   1   3  -1 249.395 5.93833   2
  -1  -3   1 249.781 6.17588   3
  -1  -3   1 251.840 6.35109   1
  -1  -3   1 250.041 5.92728   2
  -1  -3   1 248.397 6.21416   4
  -1  -3   1 248.700 6.26423   7
  -1  -3   1 246.261 6.15079   3
   0   3  -1 740.904 17.5748   3
   0   3  -1 739.643 17.4927   4
   0   3  -1 744.366 17.3849   2
   0   3  -1 766.492 17.5354   3
   0   3  -1 757.028 17.6477   1
   0  -3   1 744.853 17.5135   4
   0  -3   1 760.525 17.5690   3
   0  -3   1 760.247 17.6219   1
   0  -3   1 738.258 17.3668   2
   0  -3   1 750.075 17.5336   3
  -1   3  -1 1286.45 29.7296   3
  -1   3  -1 1301.19 29.7397   4
  -1   3  -1 1246.15 29.8601   1
  -1   3  -1 1277.04 29.8122   3
  -1   3  -1 1284.77 29.7381   2
   1  -3   1 1302.85 29.7541   4
   1  -3   1 1308.69 29.7711   3
   1  -3   1 1276.08 29.7303   2
   1  -3   1 1294.93 29.8669   1
   1  -3   1 1330.55 29.8488   3
  -2   3  -1 3342.89 81.9427   4
  -2   3  -1 3608.82 81.3776   3
  -2   3  -1 3430.44 81.6959   3
  -2   3  -1 3564.66 80.9560   2
  -2   3  -1 3540.51 82.9331   1
   2  -3   1 3872.93 80.3767   3
   2  -3   1 3560.28 82.5748   1
   2  -3   1 3408.45 81.7300   3
   2  -3   1 3360.10 82.2760   4
   2  -3   1 3283.35 81.9101   2
  -3   3  -1 125.500 3.79638   2
  -3   3  -1 118.076 3.73860   5
  -3   3  -1 124.835 3.47137   3
  -3   3  -1 124.635 3.33000   3
  -3   3  -1 120.962 3.59341   4
   3  -3   1 126.764 3.82706   1
   3  -3   1 125.784 3.61117   4
   3  -3   1 124.215 3.71296   2
   3  -3   1 123.055 3.58210   3
   3  -3   1 115.490 3.44695   3
  -4   3  -1 199.853 5.45072   4
  -4   3  -1 201.942 4.92809   3
  -4   3  -1 200.411 5.66413   5
  -4   3  -1 196.395 4.97949   3
  -4   3  -1 203.464 5.66949   2
   4  -3   1 204.332 5.43444   4
   4  -3   1 197.959 5.65364   2
   4  -3   1 198.584 5.65444   1
   4  -3   1 200.286 5.21170   3
   4  -3   1 199.775 5.31558   3
  -5   3  -1 44.9715 2.32808   5
  -5   3  -1 43.3079 2.27182   2
  -5   3  -1 42.6592 2.00248   4
   5  -3   1 40.4218 1.72014   3
   5  -3   1 42.1625 1.95729   4
   5  -3   1 42.2166 2.25224   2
   5  -3   1 46.0215 2.32153   5
   5  -3   1 39.6772 1.84676   3
  -6   3  -1 211.373 6.51060   5
  -6   3  -1 208.339 6.04620   4
  -6   3  -1 220.872 6.38835   2
   6  -3   1 215.454 6.09775   4
   6  -3   1 220.881 5.61348   3
   6  -3   1 219.616 5.73353   3
   6  -3   1 219.393 6.40431   2
   6  -3   1 221.235 6.46594   5
  -7   3  -1 61.1865 3.14686   5
  -7   3  -1 63.2460 2.68139   4
  -7   3  -1 59.0472 2.89602   2
   7  -3   1 57.7951 2.11677   3
   7  -3   1 60.5096 2.97604   2
   7  -3   1 63.9127 2.74315   4
   7  -3   1 60.1449 3.11558   5
   7  -3   1 61.8165 2.25662   3
  -8   3  -1 463.252 11.9807   4
  -8   3  -1 480.070 12.8698   5
   8  -3   1 474.172 11.4091   3
   8  -3   1 479.403 12.6713   5
   8  -3   1 453.852 11.9308   4
   8  -3   1 455.194 12.3552   2
   8  -3   1 465.696 11.2843   3
  -9   3  -1 69.9102 3.03972   4
  -9   3  -1 68.1827 3.75271   5
   9  -3   1 70.7590 3.54652   5
   9  -3   1 73.3677 3.52110   2
   9  -3   1 62.2746 2.98999   4
   9  -3   1 69.6219 2.36111   3
   9  -3   1 63.9715 2.44548   3
 -10   3  -1 95.4400 4.12881   4
 -10   3  -1 94.5625 4.58728   5
  10  -3   1 84.5312 2.96309   3
  10  -3   1 86.7582 3.61356   4
  10  -3   1 84.6543 2.84331   3
  10  -3   1 85.4119 4.01749   2
 -11   3  -1 9.74414 2.35088   5
  11  -3   1 5.41752 1.74691   2
  11  -3   1 8.18787 1.50414   4
  11  -3   1 9.06363 1.05393   3
  11  -3   1 9.76086 1.17281   3
 -12   3  -1 22.6369 3.31696   5
  12  -3   1 16.8218 2.34722   2
  12  -3   1 15.5395 1.35028   3
  12  -3   1 16.2744 1.97336   4
  12  -3   1 19.9103 1.60088   3
  13  -3   1 6.18593 1.92136   2
  13  -3   1 1.73631 1.50166   4
  13  -3   1 6.48002 1.06574   3
  14  -3   1 64.6721 4.08479   2
  14  -3   1 63.0606 3.50119   4
  15  -3   1 3.19212 1.69558   4
  15  -3   1 8.72563 2.19396   2
  16  -3   1 4.02577 2.22601   2
  16  -3   1 1.24336 1.67291   4
  17  -3   1 31.3085 3.63186   2
  17  -3   1 27.9063 2.91720   4
  18   2  -1 2.17796 2.15446   1
  18   2  -1 -0.8958 1.74473   2
  17   2  -1 -0.7195 1.77116   4
  17   2  -1 3.60282 2.12125   1
  17   2  -1 -1.6784 1.68210   2
  16   2  -1 30.8644 2.94370   2
  16   2  -1 31.0953 2.90295   4
  16   2  -1 28.9613 3.39428   1
  15   2  -1 10.7157 2.07599   2
  15   2  -1 15.1486 2.52222   1
  15   2  -1 10.7563 2.10327   4
  14   2  -1 1.42709 1.38937   4
  14   2  -1 0.68250 1.47208   2
  14   2  -1 2.03814 1.79695   1
  13   2  -1 0.27156 1.16835   2
  13   2  -1 0.96271 1.43743   4
  13   2  -1 2.29557 1.90425   1
  12   2  -1 51.5573 3.45489   1
  12   2  -1 59.5549 3.13838   2
  12   2  -1 53.6852 3.06306   4
  11   2  -1 42.9398 2.64053   4
  11   2  -1 41.4673 2.65979   2
  11   2  -1 45.8781 3.07902   1
  10   2  -1 7.19524 1.34101   4
  10   2  -1 5.81963 1.39527   2
  10   2  -1 10.8214 1.59575   6
  10   2  -1 8.01795 1.63737   1
   9   2  -1 177.626 5.56139   6
   9   2  -1 180.896 5.99177   1
   9   2  -1 177.963 5.47415   4
   9   2  -1 191.121 5.87328   7
   9   2  -1 175.023 5.48143   2
   8   2  -1 170.756 5.25033   6
   8   2  -1 171.093 5.18493   2
   8   2  -1 177.977 5.51965   7
   8   2  -1 173.163 6.30723   5
   8   2  -1 173.717 5.64310   1
   7   2  -1 351.389 9.21387   6
   7   2  -1 360.697 10.2435   5
   7   2  -1 351.605 9.37535   7
   7   2  -1 364.560 9.10721   2
   7   2  -1 341.029 9.51048   1
   6   2  -1 33.1666 2.62957   5
   6   2  -1 30.9262 1.90470   7
   6   2  -1 40.0265 1.97422   6
   6   2  -1 37.1114 1.78042   2
   6   2  -1 32.2102 2.06222   1
  -6  -2   1 36.1365 2.09369   7
   5   2  -1 301.443 7.74140   7
   5   2  -1 302.492 7.52642   6
   5   2  -1 294.698 8.41230   5
   5   2  -1 303.104 7.85143   1
   5   2  -1 283.238 7.36329   2
  -5  -2   1 287.242 7.77611   7
   4   2  -1 436.258 10.2584   6
   4   2  -1 407.177 10.5221   1
   4   2  -1 427.512 11.0732   5
   4   2  -1 426.152 10.4809   7
  -4  -2   1 428.285 10.2829   6
  -4  -2   1 413.376 10.5002   7
   3   2  -1 1797.11 41.1062   1
   3   2  -1 1755.82 40.9566   3
   3   2  -1 1810.02 40.9810   3
   3   2  -1 1714.96 41.0009   7
   3   2  -1 1827.59 41.3521   6
  -3  -2   1 1777.24 41.0597   7
  -3  -2   1 1758.67 42.4273   6
  -3  -2   1 1835.16 41.1074   1
   2   2  -1 62.5206 1.78718   3
   2   2  -1 65.3431 1.75697   3
   2   2  -1 64.6345 1.86245   6
   2   2  -1 61.5060 2.07749   1
   2   2  -1 66.0451 2.06418   7
  -2  -2   1 62.5845 1.67369   3
  -2  -2   1 58.5606 2.09721   7
  -2  -2   1 61.4924 2.13362   1
  -2  -2   1 60.5066 1.62811   3
  -2  -2   1 61.4824 1.85071   6
   1   2  -1 200.905 4.91456   4
   1   2  -1 198.185 4.87942   3
   1   2  -1 196.519 5.02148   1
   1   2  -1 203.739 4.68328   2
   1   2  -1 196.527 4.89693   3
  -1  -2   1 204.436 5.05013   1
  -1  -2   1 200.557 4.99756   7
  -1  -2   1 199.268 4.86724   3
  -1  -2   1 198.207 4.91049   4
  -1  -2   1 197.022 4.83616   3
   0   2  -1 147.598 3.68735   3
   0   2  -1 139.512 3.69456   3
   0   2  -1 142.474 3.71088   1
   0   2  -1 143.091 3.55482   2
   0   2  -1 146.095 3.65806   4
   0  -2   1 144.667 3.73077   1
   0  -2   1 145.892 3.65823   4
   0  -2   1 139.571 3.68898   3
   0  -2   1 144.640 3.69390   3
  -1   2  -1 81.1518 2.34427   3
  -1   2  -1 84.3623 2.39581   2
  -1   2  -1 82.2950 2.37045   4
  -1   2  -1 82.2148 2.42690   3
  -1   2  -1 82.5882 2.42983   1
   1  -2   1 87.8395 2.47400   3
   1  -2   1 81.2513 2.37601   3
   1  -2   1 86.2810 2.38236   4
   1  -2   1 84.4752 2.38473   2
   1  -2   1 85.1007 2.45769   1
  -2   2  -1 41.1411 1.73768   2
  -2   2  -1 40.4076 1.69774   1
  -2   2  -1 42.2956 1.63335   5
  -2   2  -1 41.8465 1.43471   3
  -2   2  -1 41.6281 1.62524   4
  -2   2  -1 42.9062 1.56473   3
   2  -2   1 42.0815 1.52085   3
   2  -2   1 41.9053 1.72856   2
   2  -2   1 44.0910 1.64433   4
   2  -2   1 39.8730 1.71097   1
   2  -2   1 42.4224 1.62985   3
  -3   2  -1 1403.18 32.4763   3
  -3   2  -1 1426.87 32.5488   4
  -3   2  -1 1400.45 32.6644   2
  -3   2  -1 1398.26 32.6251   5
  -3   2  -1 1446.62 32.7815   3
   3  -2   1 1395.54 32.6593   2
   3  -2   1 1407.72 32.3458   3
   3  -2   1 1401.99 32.6357   1
   3  -2   1 1403.20 32.5226   4
   3  -2   1 1402.00 32.2720   3
   3  -2   1 1437.27 32.6406   5
  -4   2  -1 12.1199 1.14138   4
  -4   2  -1 12.6350 1.18669   2
  -4   2  -1 11.8552 1.29701   5
   4  -2   1 15.8523 1.33832   5
   4  -2   1 12.7597 1.11779   4
   4  -2   1 10.4073 0.85473   3
   4  -2   1 12.3590 0.86169   3
   4  -2   1 11.3637 1.25120   2
  -5   2  -1 2.08558 0.96542   2
  -5   2  -1 3.04205 1.29109   5
  -5   2  -1 2.39593 0.92093   4
   5  -2   1 1.80045 0.49318   3
   5  -2   1 2.12537 0.77765   4
   5  -2   1 0.90638 0.92144   2
   5  -2   1 1.79696 0.96690   5
   5  -2   1 1.94740 0.55911   3
  -6   2  -1 19.0344 1.89860   5
  -6   2  -1 21.7553 1.71950   2
  -6   2  -1 20.5513 1.55737   4
   6  -2   1 21.2668 1.52777   4
   6  -2   1 19.6223 0.94820   3
   6  -2   1 24.8558 1.99898   5
   6  -2   1 21.6388 1.82260   2
   6  -2   1 20.2943 1.06679   3
  -7   2  -1 126.418 4.32954   2
  -7   2  -1 124.511 4.03059   4
  -7   2  -1 114.361 4.53411   5
   7  -2   1 126.720 3.20845   3
   7  -2   1 124.684 4.31993   2
   7  -2   1 121.567 3.25782   3
   7  -2   1 125.722 4.49413   5
   7  -2   1 122.458 4.00188   4
  -8   2  -1 413.903 10.5849   4
  -8   2  -1 401.577 11.3724   5
   8  -2   1 408.115 10.9009   2
   8  -2   1 412.071 9.63881   3
   8  -2   1 402.216 10.5715   4
   8  -2   1 404.975 11.2414   5
   8  -2   1 400.977 9.58296   3
  -9   2  -1 15.8160 2.30588   5
   9  -2   1 16.7562 0.92591   3
   9  -2   1 20.6610 2.28880   5
   9  -2   1 12.8236 1.77987   2
   9  -2   1 17.1561 1.01835   3
   9  -2   1 18.1667 1.70186   4
 -10   2  -1 -0.3014 1.63147   5
  10  -2   1 1.07105 0.59326   3
  10  -2   1 1.27896 0.49718   3
  10  -2   1 2.00808 1.28653   2
  10  -2   1 0.05057 1.15730   4
 -11   2  -1 9.30857 2.32670   5
  11  -2   1 12.3496 1.00876   3
  11  -2   1 11.9284 0.91247   3
  11  -2   1 12.9157 1.94950   2
  11  -2   1 11.6634 1.75739   4
  12  -2   1 56.0629 2.10157   3
  12  -2   1 53.0954 1.93894   3
  12  -2   1 50.0581 3.10744   4
  12  -2   1 52.8097 3.36540   2
  13  -2   1 11.4199 2.16471   2
  13  -2   1 11.3275 1.56942   3
  13  -2   1 13.1599 1.12358   3
  13  -2   1 13.2879 1.86380   4
  14  -2   1 4.07092 1.78863   2
  14  -2   1 3.10553 1.62526   4
  15  -2   1 53.0761 3.79549   2
  15  -2   1 46.1376 3.32852   4
  16  -2   1 13.4842 2.35283   4
  16  -2   1 13.1115 2.50007   2
  17  -2   1 2.44644 1.87226   2
  17  -2   1 0.10027 1.73096   4
  18  -2   1 -0.4900 1.83341   2
  18   1  -1 0.20296 1.92948   2
  18   1  -1 4.25166 2.23587   1
  17   1  -1 2.26170 2.09879   1
  17   1  -1 0.22012 1.76311   4
  17   1  -1 -1.3807 1.36718   2
  16   1  -1 0.21160 1.60346   2
  16   1  -1 -2.1809 2.06709   1
  16   1  -1 1.82875 1.77580   4
  15   1  -1 2.60862 1.83820   1
  15   1  -1 -3.0992 1.36299   2
  15   1  -1 -0.0149 1.58784   4
  14   1  -1 34.1034 2.88321   2
  14   1  -1 30.9783 3.22555   1
  14   1  -1 29.9638 2.67371   4
  13   1  -1 4.86034 1.47532   2
  13   1  -1 1.71961 1.40924   4
  13   1  -1 4.49469 1.79211   1
  12   1  -1 35.4762 2.57314   4
  12   1  -1 36.0283 2.79157   2
  11   1  -1 37.1998 2.55800   2
  11   1  -1 35.6286 2.42693   4
  10   1  -1 331.587 9.04926   2
  10   1  -1 333.073 9.24546   7
  10   1  -1 314.294 8.87514   4
   9   1  -1 121.938 4.12030   4
   9   1  -1 124.214 4.44483   7
   9   1  -1 124.798 4.31492   6
   9   1  -1 117.938 4.18186   2
   8   1  -1 7.30462 1.28814   2
   8   1  -1 8.11348 1.33776   7
   8   1  -1 12.9694 1.92924   5
   8   1  -1 10.4386 1.37666   6
   8   1  -1 6.20035 1.20479   4
   7   1  -1 43.1568 2.03759   4
   7   1  -1 44.1431 2.94561   5
   7   1  -1 34.8940 1.95288   2
   7   1  -1 40.3349 2.27889   7
   7   1  -1 40.1344 2.09832   6
   6   1  -1 26.2417 2.26361   5
   6   1  -1 26.5545 1.69082   7
   6   1  -1 22.4898 1.50273   2
   6   1  -1 22.8397 1.68840   6
   5   1  -1 131.254 4.00212   7
   5   1  -1 133.241 3.87717   2
   5   1  -1 136.984 3.93004   6
   5   1  -1 144.741 4.74769   5
  -5  -1   1 131.300 4.11728   7
   4   1  -1 159.447 4.19939   2
   4   1  -1 157.314 4.25076   6
   4   1  -1 156.354 4.37806   7
   4   1  -1 151.876 4.81058   5
  -4  -1   1 160.349 4.48163   7
   3   1  -1 226.053 5.76237   7
   3   1  -1 227.112 5.63941   6
   3   1  -1 235.074 6.22365   5
   3   1  -1 227.420 5.57021   2
  -3  -1   1 218.686 5.77660   7
   2   1  -1 223.844 5.34210   2
   2   1  -1 227.025 5.95585   5
   2   1  -1 228.889 5.68283   1
   2   1  -1 226.170 5.43203   6
   2   1  -1 232.292 5.58959   7
  -2  -1   1 226.413 5.42880   6
  -2  -1   1 219.536 5.57413   7
   1   1  -1 6.23576 0.41845   4
   1   1  -1 6.27021 0.50293   7
  -1  -1   1 10.0148 0.66560   1
   0   1  -1 53.8661 1.49649   4
   0   1  -1 54.7857 1.43167   2
   0   1  -1 60.9365 1.55846   3
  -1   1  -1 120.934 3.06379   2
  -1   1  -1 120.691 3.06461   4
   1  -1   1 122.292 3.02629   3
   1  -1   1 120.305 3.00400   1
   1  -1   1 119.066 3.04749   4
   1  -1   1 121.017 2.98876   3
  -2   1  -1 390.800 9.28772   2
  -2   1  -1 370.338 9.18244   5
  -2   1  -1 390.461 9.23791   4
   2  -1   1 378.827 9.21942   4
   2  -1   1 394.069 9.02866   3
   2  -1   1 401.656 9.22165   5
   2  -1   1 391.857 8.98435   3
  -3   1  -1 809.467 19.2690   5
  -3   1  -1 827.437 19.2549   2
  -3   1  -1 826.994 19.1719   4
   3  -1   1 813.820 19.1561   4
   3  -1   1 830.934 19.2781   2
   3  -1   1 799.789 18.8079   3
   3  -1   1 813.443 19.2661   5
   3  -1   1 853.317 18.8970   3
  -4   1  -1 1.58149 1.00962   5
  -4   1  -1 2.12647 0.88117   2
  -4   1  -1 1.12663 0.71641   4
   4  -1   1 2.23889 0.92295   5
   4  -1   1 1.68204 0.83299   4
   4  -1   1 2.22273 0.89242   2
  -5   1  -1 28.3421 1.66518   4
  -5   1  -1 26.2579 1.95693   5
   5  -1   1 31.2422 1.88439   5
   5  -1   1 28.0187 1.56475   4
   5  -1   1 28.9197 1.79659   2
  -6   1  -1 284.170 8.00857   5
  -6   1  -1 282.105 7.39090   4
   6  -1   1 276.007 7.79967   5
   6  -1   1 281.163 7.38028   4
   6  -1   1 273.834 7.55847   2
  -7   1  -1 93.9540 3.97758   5
   7  -1   1 91.6394 3.37996   4
   7  -1   1 100.075 3.63885   2
   7  -1   1 93.9320 3.80294   5
  -8   1  -1 178.125 6.28538   5
   8  -1   1 182.332 5.69470   2
   8  -1   1 189.938 6.13283   5
   8  -1   1 177.948 5.48075   4
   9  -1   1 147.460 4.84141   4
   9  -1   1 146.734 5.16073   2
   9  -1   1 145.108 5.45269   5
  10  -1   1 49.4193 2.86216   2
  10  -1   1 48.9179 2.60887   4
  10  -1   1 43.6682 2.66922   7
  11  -1   1 13.0815 1.86728   2
  11  -1   1 17.9396 2.05224   4
  12  -1   1 6.62885 1.50781   4
  12  -1   1 7.10219 0.51787   3
  12  -1   1 7.02945 1.69663   2
  12  -1   1 7.00357 0.51593   3
  13  -1   1 29.2199 2.78046   2
  13  -1   1 27.3585 2.49206   4
  13  -1   1 28.6155 1.19123   3
  13  -1   1 26.0683 1.11066   3
  14  -1   1 3.12757 1.52138   4
  14  -1   1 2.72793 1.88344   2
  15  -1   1 -1.1039 1.71836   2
  15  -1   1 -2.0552 1.49818   4
  16  -1   1 1.71089 1.83891   4
  16  -1   1 8.98258 2.13944   2
  17  -1   1 8.92031 2.43608   1
  17  -1   1 9.51367 2.21042   4
  17  -1   1 7.75999 2.19458   2
  18  -1   1 0.14958 1.91404   4
  18  -1   1 6.84963 2.14673   1
  18  -1   1 5.18856 2.21091   2
  18   0  -1 -0.2523 1.78430   2
  18   0  -1 -3.2722 2.12811   1
  17   0  -1 2.16513 1.95102   2
  17   0  -1 3.06286 2.31094   1
  16   0  -1 6.23377 2.07958   2
  16   0  -1 4.32263 1.92300   4
  16   0  -1 4.93400 2.27335   1
  15   0  -1 7.26782 1.89551   4
  15   0  -1 9.24428 2.11373   2
  14   0  -1 17.5469 2.38000   2
  14   0  -1 18.4994 2.22168   4
  13   0  -1 58.2172 3.44057   2
  13   0  -1 45.8685 1.51499   3
  13   0  -1 53.1747 3.10015   4
  12   0  -1 101.935 4.35540   2
  12   0  -1 96.8345 4.01980   4
  11   0  -1 8.71806 1.48910   4
  11   0  -1 6.50533 1.42071   2
  10   0  -1 10.9281 1.54443   2
  10   0  -1 9.93724 1.62639   7
  10   0  -1 9.50182 1.44411   4
   9   0  -1 5.02726 1.28858   7
   9   0  -1 7.31384 1.38043   2
   9   0  -1 7.17758 1.26484   4
   8   0  -1 25.1140 2.59600   5
   8   0  -1 20.4594 1.72763   2
   8   0  -1 27.1912 2.03889   7
   8   0  -1 23.9675 1.64396   4
  -8   0   1 24.7799 2.57657   5
   7   0  -1 94.4235 3.46498   2
   7   0  -1 105.771 4.31065   5
   7   0  -1 100.235 3.31975   4
   7   0  -1 100.549 3.56769   7
  -7   0   1 102.443 4.48095   5
   6   0  -1 129.955 4.02662   7
   6   0  -1 122.911 3.90663   2
   6   0  -1 129.120 4.70512   5
   6   0  -1 129.852 3.79285   4
  -6   0   1 128.794 4.85663   5
   5   0  -1 125.404 3.73888   7
   5   0  -1 116.913 3.61978   2
   5   0  -1 122.428 3.50572   4
   5   0  -1 126.258 4.39077   5
  -5   0   1 122.265 3.65344   2
  -5   0   1 124.325 4.46109   5
   4   0  -1 2090.42 49.6477   4
   4   0  -1 2073.62 48.1997   7
   4   0  -1 2091.18 48.9626   2
   4   0  -1 2136.00 48.8345   5
  -4   0   1 2136.98 48.8755   5
  -4   0   1 2097.65 48.1911   2
   3   0  -1 271.525 6.44035   4
   3   0  -1 282.444 7.15355   5
   3   0  -1 260.843 6.55509   2
   3   0  -1 262.038 6.58350   7
  -3   0   1 268.733 6.59850   7
  -3   0   1 257.156 7.10743   5
  -3   0   1 265.913 6.57296   2
   2   0  -1 12.6071 1.11150   5
   2   0  -1 8.27051 0.65890   7
   2   0  -1 7.75066 0.58623   2
  -2   0   1 10.4676 1.04587   5
   1   0  -1 316.648 7.48014   2
   1   0  -1 344.364 7.79485   5
   1   0  -1 321.179 7.46024   3
   1   0  -1 305.785 7.48703   7
   1   0  -1 335.084 7.47622   3
   0   0  -1 -0.0279 0.05794   4
  -1   0  -1 102.501 2.63767   4
   1   0   1 95.7158 2.49592   3
   1   0   1 119.495 2.52507   3
  -2   0  -1 0.29707 0.40671   4
   2   0   1 0.68328 0.49855   5
   2   0   1 0.36863 0.42900   4
  -3   0  -1 39.7188 1.57713   4
   3   0   1 40.7623 1.59537   4
   3   0   1 40.3122 1.80440   5
   4   0   1 229.121 5.92192   4
   4   0   1 231.398 6.01149   2
   4   0   1 227.468 6.22803   5
   5   0   1 53.4594 2.14498   4
   5   0   1 55.7404 2.25047   2
   5   0   1 56.6090 2.53315   5
   6   0   1 204.926 5.79124   2
   6   0   1 206.858 5.67107   4
   6   0   1 203.319 6.15895   5
   7   0   1 188.895 6.08121   5
   7   0   1 185.805 5.59708   2
   7   0   1 183.360 5.37503   4
   8   0   1 73.3800 3.09960   7
   8   0   1 59.2150 2.82371   2
   8   0   1 61.4677 3.24542   5
   8   0   1 57.5470 2.64906   4
   9   0   1 6.20854 1.24571   4
   9   0   1 3.57781 1.37272   7
   9   0   1 6.81287 1.68806   5
   9   0   1 5.16524 1.27662   2
  10   0   1 4.12041 1.22268   4
  10   0   1 1.82320 1.18473   2
  10   0   1 2.86058 1.49653   7
  11   0   1 76.7694 3.56998   4
  11   0   1 83.6038 3.74204   2
  12   0   1 5.08035 1.55386   4
  12   0   1 2.63930 1.40849   2
  13   0   1 71.5165 3.54908   4
  13   0   1 62.1518 3.81009   2
  14   0   1 172.132 6.35400   2
  14   0   1 164.327 6.11088   4
  15   0   1 7.25274 1.80204   4
  15   0   1 7.93483 1.96095   2
  15   0   1 6.57134 1.87678   1
  16   0   1 -1.2729 1.72495   4
  16   0   1 2.03648 1.72030   2
  16   0   1 3.15263 1.76456   1
  17   0   1 5.55031 1.98675   2
  17   0   1 2.43276 2.06683   1
  17   0   1 5.23837 2.09632   4
  18   0   1 2.31237 2.08567   2
  18   0   1 1.31237 1.95941   4
  18   0   1 3.38299 2.20495   1
  18  -1  -1 5.43287 2.15253   2
  18  -1  -1 5.67081 2.36721   1
  17  -1  -1 16.8024 2.87380   1
  17  -1  -1 14.3534 2.50566   2
  16  -1  -1 -0.5633 1.54611   4
  16  -1  -1 3.60640 1.74349   2
  15  -1  -1 21.1440 2.71870   2
  15  -1  -1 22.6885 2.52851   4
  14  -1  -1 9.17872 2.07603   2
  14  -1  -1 2.39911 1.51366   4
  13  -1  -1 5.42038 1.65308   2
  13  -1  -1 6.33634 0.84496   3
  13  -1  -1 5.66623 1.57319   4
  12  -1  -1 0.69414 0.53701   3
  12  -1  -1 -0.0072 1.21053   4
  12  -1  -1 0.75959 1.25995   2
  12  -1  -1 1.21399 0.58793   3
  11  -1  -1 3.81365 0.57055   3
  11  -1  -1 2.98966 1.28779   4
  11  -1  -1 4.21363 1.35699   2
 -11   1   1 3.02018 2.15802   5
  10  -1  -1 9.16912 1.43895   4
  10  -1  -1 8.59454 0.60859   3
  10  -1  -1 6.06299 0.53660   3
  10  -1  -1 6.06897 1.49226   2
  10  -1  -1 8.13108 1.52316   7
 -10   1   1 8.26163 2.24569   5
   9  -1  -1 1.01847 0.99485   4
   9  -1  -1 1.10824 0.30367   3
   9  -1  -1 1.20539 1.15709   7
   9  -1  -1 1.91137 0.34231   3
   9  -1  -1 1.70606 1.19344   2
  -9   1   1 2.08835 1.81593   5
   8  -1  -1 22.2034 1.85875   7
   8  -1  -1 20.0446 1.79959   2
   8  -1  -1 22.4671 1.70819   4
   8  -1  -1 24.4587 2.54757   5
   8  -1  -1 22.7536 0.71531   3
   8  -1  -1 22.6294 0.70871   3
  -8   1   1 21.8078 1.85277   2
  -8   1   1 22.1288 2.56712   5
   7  -1  -1 343.286 8.71740   4
   7  -1  -1 339.242 9.76068   5
   7  -1  -1 326.175 8.96582   2
   7  -1  -1 334.803 8.87897   7
  -7   1   1 345.115 9.02178   2
  -7   1   1 352.768 9.89401   5
   6  -1  -1 101.585 4.11632   5
   6  -1  -1 105.407 3.53883   2
   6  -1  -1 110.924 3.48657   7
   6  -1  -1 105.412 3.30285   4
  -6   1   1 105.248 3.63761   2
  -6   1   1 110.776 4.36189   5
   5  -1  -1 342.095 8.56155   2
   5  -1  -1 343.364 9.17388   5
   5  -1  -1 325.825 7.68667   3
   5  -1  -1 335.492 7.69129   3
   5  -1  -1 336.353 8.40951   7
   5  -1  -1 335.789 8.27168   4
  -5   1   1 329.549 8.53900   2
  -5   1   1 329.863 9.18418   5
   4  -1  -1 0.59826 0.70389   2
   4  -1  -1 1.59553 0.32809   3
   4  -1  -1 1.12919 0.33261   3
   4  -1  -1 1.82147 1.16946   5
   4  -1  -1 0.36545 0.61140   4
  -4   1   1 0.57779 0.73613   2
  -4   1   1 1.57863 0.61722   4
  -4   1   1 0.70047 1.16382   5
   3  -1  -1 163.641 4.77600   5
   3  -1  -1 161.954 4.32778   2
   3  -1  -1 160.352 4.09725   4
   3  -1  -1 160.368 3.90998   3
  -3   1   1 162.501 4.79084   5
  -3   1   1 161.808 4.09576   4
  -3   1   1 163.570 4.34131   2
   2  -1  -1 216.583 5.13151   4
   2  -1  -1 206.272 5.12795   3
   2  -1  -1 219.199 5.14738   3
   2  -1  -1 219.905 5.35594   2
   2  -1  -1 215.366 5.66440   5
  -2   1   1 208.306 5.03966   3
  -2   1   1 208.270 5.33805   2
  -2   1   1 222.287 5.05512   3
  -2   1   1 223.109 5.69795   5
  -2   1   1 216.144 5.13205   4
   1  -1  -1 53.0515 1.54594   3
   1  -1  -1 55.0628 1.56597   2
   1  -1  -1 54.6037 1.52505   3
   1  -1  -1 53.7749 1.81187   5
   1  -1  -1 53.6098 1.38614   4
  -1   1   1 55.9818 1.56752   2
   1   1   1 23.6764 0.79626   3
   1   1   1 29.7926 0.90880   6
   1   1   1 25.0926 0.71396   3
   1   1   1 22.0681 0.78105   1
   1   1   1 21.8139 0.86583   7
  -2  -1  -1 6.81836 0.54028   1
  -2  -1  -1 7.61632 0.67706   6
   2   1   1 6.79447 0.56372   1
   2   1   1 7.14795 0.68591   6
  -3  -1  -1 9.46032 0.99860   6
   3   1   1 8.97168 0.82734   1
   3   1   1 9.39251 0.95785   6
   4   1   1 32.6918 1.72012   7
   4   1   1 31.9285 1.64846   6
   5   1   1 529.870 12.9131   6
   5   1   1 523.319 12.9762   7
   5   1   1 530.346 13.3339   5
   6   1   1 6.77005 1.24602   7
   6   1   1 6.52343 1.03888   4
   6   1   1 7.61072 1.47364   5
   6   1   1 6.26772 1.01019   2
   6   1   1 7.09694 1.14888   6
   7   1   1 14.9459 1.87952   5
   7   1   1 13.5511 1.53957   7
   7   1   1 10.4573 1.27831   4
   7   1   1 13.0798 1.49035   6
   7   1   1 11.3741 1.31716   2
   8   1   1 9.59585 1.31626   4
   8   1   1 7.32894 1.36074   7
   8   1   1 10.9002 1.80112   5
   8   1   1 6.78772 1.22456   2
   8   1   1 11.7202 1.48698   6
   9   1   1 43.0219 2.45514   4
   9   1   1 43.6662 2.42117   2
   9   1   1 43.5549 2.60955   6
   9   1   1 43.0096 2.95281   5
   9   1   1 41.1843 2.50142   7
  10   1   1 3.94914 1.32787   4
  10   1   1 5.26284 1.31279   2
  11   1   1 68.2070 3.34119   2
  11   1   1 66.7974 3.31705   4
  12   1   1 14.5827 1.93742   2
  12   1   1 15.0924 2.00867   1
  12   1   1 14.7846 1.94428   4
  13   1   1 7.85586 1.89764   1
  13   1   1 10.5173 1.78543   4
  13   1   1 5.71316 1.81416   2
  14   1   1 2.92373 1.59112   2
  14   1   1 4.18936 1.63055   4
  14   1   1 3.43931 1.70277   1
  15   1   1 0.32121 1.46284   4
  15   1   1 1.96484 1.63729   1
  15   1   1 0.23050 1.50426   2
  16   1   1 13.1322 2.42474   1
  16   1   1 16.6081 2.59206   2
  16   1   1 14.4193 2.47531   4
  17   1   1 3.21349 2.04781   1
  17   1   1 1.56841 1.67046   2
  17   1   1 2.33213 1.96656   4
  18   1   1 0.31395 1.89036   1
  18   1   1 -0.6808 1.90885   4
  18   1   1 1.19281 1.69890   2
  17  -2  -1 1.99218 2.10666   2
  16  -2  -1 -4.8177 1.40042   4
  16  -2  -1 0.33133 1.60600   2
  15  -2  -1 1.27574 1.50333   4
  15  -2  -1 5.88108 1.83501   2
  14  -2  -1 24.3328 2.38702   4
  14  -2  -1 26.6827 2.87457   2
  13  -2  -1 109.182 4.30696   4
  13  -2  -1 107.178 3.42131   3
  13  -2  -1 104.445 4.73028   2
  12  -2  -1 15.4665 1.88948   4
  12  -2  -1 16.7285 1.29147   3
  12  -2  -1 14.6363 2.07019   2
  12  -2  -1 19.2582 1.43393   3
 -12   2   1 19.9708 3.44797   5
  11  -2  -1 22.6685 1.98746   4
  11  -2  -1 23.1791 1.42513   3
  11  -2  -1 24.9617 1.42393   3
  11  -2  -1 27.8220 2.42382   2
  11  -2  -1 24.6763 2.31609   7
 -11   2   1 21.9864 3.32709   5
  10  -2  -1 12.2852 1.65819   7
  10  -2  -1 10.3361 0.92490   3
  10  -2  -1 9.16041 0.91973   3
  10  -2  -1 7.60646 1.53546   2
  10  -2  -1 10.5045 1.44989   4
 -10   2   1 12.2851 2.48252   5
   9  -2  -1 289.991 8.37866   2
   9  -2  -1 283.484 7.20141   3
   9  -2  -1 299.857 7.24610   3
   9  -2  -1 299.620 8.15943   7
   9  -2  -1 293.944 7.94119   4
  -9   2   1 286.174 9.35425   5
   8  -2  -1 185.799 5.61947   7
   8  -2  -1 191.721 5.47969   4
   8  -2  -1 189.081 4.84768   3
   8  -2  -1 188.348 6.50653   5
   8  -2  -1 186.119 5.85857   2
   8  -2  -1 190.865 4.85105   3
  -8   2   1 196.334 5.96481   2
  -8   2   1 185.754 6.69535   5
   7  -2  -1 138.492 4.62737   2
   7  -2  -1 139.724 3.75714   3
   7  -2  -1 146.475 5.24266   5
   7  -2  -1 138.382 3.75585   3
   7  -2  -1 148.293 4.29552   4
  -7   2   1 147.167 5.43832   5
  -7   2   1 142.652 4.23401   4
  -7   2   1 143.246 4.66767   2
   6  -2  -1 17.1997 1.54314   2
   6  -2  -1 15.7102 1.01983   3
   6  -2  -1 19.0116 2.01544   5
   6  -2  -1 15.9977 1.01761   3
   6  -2  -1 15.5622 1.25388   4
  -6   2   1 15.1825 1.53521   2
  -6   2   1 10.3234 1.85255   5
  -6   2   1 15.4258 1.26569   4
   5  -2  -1 156.558 4.21609   3
   5  -2  -1 173.793 4.51904   4
   5  -2  -1 171.417 5.33526   5
   5  -2  -1 168.980 4.26162   3
   5  -2  -1 159.633 4.82749   2
  -5   2   1 164.693 4.51673   4
  -5   2   1 164.264 5.40593   5
  -5   2   1 166.916 4.88813   2
   4  -2  -1 9.73797 0.80613   3
   4  -2  -1 9.85914 0.80018   3
   4  -2  -1 12.4010 1.52915   5
   4  -2  -1 10.1329 1.14746   2
   4  -2  -1 9.77694 0.89001   4
  -4   2   1 9.25980 0.88993   4
  -4   2   1 10.1897 1.54344   5
  -4   2   1 9.53793 1.12500   2
   3  -2  -1 2651.80 59.6740   3
   3  -2  -1 2525.36 59.4405   5
   3  -2  -1 2520.49 60.0054   3
   3  -2  -1 2565.65 59.9477   2
   3  -2  -1 2601.44 59.6369   4
  -3   2   1 2609.30 59.6630   3
  -3   2   1 2576.06 60.8541   5
  -3   2   1 2773.11 59.5656   4
  -3   2   1 2546.43 59.1013   2
  -3   2   1 2470.12 59.3092   3
   2  -2  -1 417.946 9.96170   3
   2  -2  -1 434.081 10.1486   2
   2  -2  -1 408.868 9.85659   4
   2  -2  -1 423.320 10.0220   3
  -2   2   1 414.583 9.92352   3
  -2   2   1 416.662 10.4241   5
  -2   2   1 422.564 10.1345   2
  -2   2   1 431.105 9.88525   4
  -2   2   1 417.967 9.89100   3
   1  -2  -1 252.595 6.13403   2
   1  -2  -1 260.547 6.19742   3
   1  -2  -1 250.886 5.97664   4
   1  -2  -1 256.858 6.12289   3
   1  -2  -1 252.938 6.32173   1
  -1   2   1 252.082 6.08180   3
  -1   2   1 242.618 6.12891   2
  -1   2   1 245.779 6.12799   3
  -1   2   1 246.005 5.96970   4
  -1   2   1 246.682 6.31875   1
   0  -2  -1 9.64747 0.76037   3
   0  -2  -1 9.90607 0.59431   7
   0  -2  -1 12.1207 0.89924   1
   0  -2  -1 11.3351 0.68164   2
   0  -2  -1 10.9832 0.72519   3
   0  -2  -1 12.5217 0.67378   4
   0   2   1 11.2322 0.79308   3
   0   2   1 9.79146 0.62714   4
   0   2   1 12.6797 0.92375   1
   0   2   1 11.6434 0.82800   3
   0   2   1 9.47334 0.52377   7
   0   2   1 10.7792 0.69808   2
  -1  -2  -1 87.6755 2.50760   7
  -1  -2  -1 93.8391 2.41811   2
  -1  -2  -1 96.5495 2.52707   6
  -1  -2  -1 88.7443 2.45086   3
  -1  -2  -1 93.2880 2.54984   1
   1   2   1 93.9952 2.42414   2
   1   2   1 92.1614 2.51998   3
   1   2   1 93.5330 2.42978   3
   1   2   1 88.8376 2.49438   7
   1   2   1 93.6344 2.56872   1
  -2  -2  -1 26.2176 0.73973   3
  -2  -2  -1 27.3942 1.23411   6
  -2  -2  -1 26.5212 1.15740   1
  -2  -2  -1 24.3780 1.29557   7
   2   2   1 26.8301 1.19395   1
   2   2   1 25.1157 0.85065   3
   2   2   1 23.7059 0.94030   3
   2   2   1 24.8320 1.27699   7
   2   2   1 26.4062 1.23059   6
  -3  -2  -1 4145.32 92.0054   1
  -3  -2  -1 4097.47 91.3208   7
  -3  -2  -1 3771.74 92.2994   6
   3   2   1 4022.86 91.8290   7
   3   2   1 3806.52 92.5834   6
   3   2   1 3846.98 92.0424   1
  -4  -2  -1 26.2417 1.48028   1
  -4  -2  -1 32.3843 1.65292   6
   4   2   1 26.7484 1.71749   7
   4   2   1 28.3599 1.47773   1
   4   2   1 30.4187 1.59538   6
  -5  -2  -1 727.972 17.6813   6
   5   2   1 751.975 17.8097   7
   5   2   1 736.296 17.6454   6
   5   2   1 735.227 17.5824   1
   6   2   1 62.3193 2.64274   7
   6   2   1 59.4861 2.43101   1
   6   2   1 59.4437 2.47367   6
   7   2   1 4.13281 1.16393   7
   7   2   1 4.00765 1.03282   1
   7   2   1 4.22218 1.09898   6
   7   2   1 4.17572 1.48519   5
   8   2   1 16.9278 1.62020   1
   8   2   1 17.0512 1.56362   2
   8   2   1 19.2104 1.77967   6
   8   2   1 18.3980 1.84720   7
   8   2   1 20.2611 2.32039   5
   9   2   1 164.192 5.33339   1
   9   2   1 167.938 5.24918   4
   9   2   1 151.754 5.12034   2
   9   2   1 165.562 5.48312   7
   9   2   1 170.922 6.10591   5
   9   2   1 169.459 5.36460   6
  10   2   1 67.6048 3.10530   2
  10   2   1 65.3382 3.16741   1
  10   2   1 67.8451 3.10180   4
  11   2   1 94.9320 3.94684   2
  11   2   1 99.5105 4.21642   1
  11   2   1 96.6318 3.99870   4
  12   2   1 29.4880 2.65312   1
  12   2   1 33.3020 2.62124   2
  12   2   1 30.8150 2.52307   4
  13   2   1 -1.5472 1.36296   2
  13   2   1 -0.9019 1.28712   1
  13   2   1 0.45507 1.45098   4
  14   2   1 40.4345 3.24087   2
  14   2   1 40.4700 3.18579   4
  14   2   1 46.3741 3.66063   1
  15   2   1 37.9173 3.14341   4
  15   2   1 33.1307 3.21851   1
  15   2   1 38.8775 3.29509   2
  16   2   1 4.05052 2.00070   1
  16   2   1 1.42904 1.58019   4
  16   2   1 1.87694 1.82907   2
  17   2   1 2.05689 1.76313   1
  17   2   1 -0.5224 1.83505   2
  17   2   1 -0.3022 1.84163   4
  18   2   1 9.42496 2.20974   2
  18   2   1 9.25765 2.45608   4
  18   2   1 6.22482 2.38978   1
  17  -3  -1 -0.0009 1.87563   2
  16  -3  -1 0.76967 1.57674   4
  16  -3  -1 5.95085 2.27224   2
  15  -3  -1 12.8870 2.37993   2
  15  -3  -1 19.6300 2.27373   4
  14  -3  -1 0.12797 1.41748   4
  14  -3  -1 1.40625 1.80544   2
  13  -3  -1 36.1446 3.12760   2
  13  -3  -1 35.9514 2.62749   4
  13  -3  -1 35.3346 2.06617   3
 -13   3   1 33.9829 4.09636   5
  12  -3  -1 1.53571 1.00527   3
  12  -3  -1 0.56041 1.24338   4
  12  -3  -1 1.52846 0.91474   3
  12  -3  -1 3.47531 1.54710   2
 -12   3   1 1.94538 2.19375   5
  11  -3  -1 72.4139 3.22600   4
  11  -3  -1 75.4665 3.45041   7
  11  -3  -1 73.9105 3.91573   2
  11  -3  -1 73.0733 2.80696   3
  11  -3  -1 71.7926 2.70354   3
 -11   3   1 74.4919 4.72761   5
  10  -3  -1 13.8161 1.31788   3
  10  -3  -1 14.1300 1.92537   2
  10  -3  -1 14.0957 1.73618   7
  10  -3  -1 14.5170 1.64805   4
  10  -3  -1 12.3427 1.19878   3
 -10   3   1 15.8611 2.67593   5
   9  -3  -1 4.50925 1.37721   2
   9  -3  -1 1.35388 0.77244   3
   9  -3  -1 0.51110 0.93374   4
   9  -3  -1 0.63947 0.77629   3
  -9   3   1 3.34604 1.98703   5
  -9   3   1 3.08602 1.05631   4
   8  -3  -1 251.765 8.08695   5
   8  -3  -1 260.449 6.69606   3
   8  -3  -1 257.435 6.99805   4
   8  -3  -1 259.709 7.54721   2
   8  -3  -1 247.724 6.60199   3
  -8   3   1 269.669 8.12216   2
  -8   3   1 242.831 8.18866   5
  -8   3   1 265.953 7.10326   4
   7  -3  -1 63.8979 3.38471   5
   7  -3  -1 65.3652 2.57358   4
   7  -3  -1 67.0901 2.34210   3
   7  -3  -1 69.2023 3.07597   2
   7  -3  -1 68.5050 2.42466   3
  -7   3   1 70.2120 3.66774   5
  -7   3   1 64.0105 2.61593   4
  -7   3   1 68.6384 3.06089   2
   6  -3  -1 745.133 17.6160   4
   6  -3  -1 726.736 17.4070   3
   6  -3  -1 753.338 17.4902   3
   6  -3  -1 720.976 18.0524   2
   6  -3  -1 750.895 18.6239   5
  -6   3   1 738.321 18.1258   2
  -6   3   1 738.542 18.6938   5
  -6   3   1 733.537 17.6468   4
   5  -3  -1 8.30296 0.96091   4
   5  -3  -1 6.26602 0.91290   3
   5  -3  -1 5.83819 0.86361   3
   5  -3  -1 5.63974 1.15270   2
   5  -3  -1 6.85771 1.41388   5
  -5   3   1 7.03367 1.60082   5
  -5   3   1 4.71438 1.14785   2
  -5   3   1 6.79158 0.94139   4
   4  -3  -1 497.273 11.8938   3
   4  -3  -1 503.194 11.8241   4
   4  -3  -1 501.518 12.6075   5
   4  -3  -1 485.201 11.8062   3
   4  -3  -1 495.840 12.2077   2
  -4   3   1 497.202 11.5366   3
  -4   3   1 483.823 12.6089   5
  -4   3   1 484.011 12.1954   2
  -4   3   1 487.336 11.5112   3
  -4   3   1 489.715 11.8340   4
   3  -3  -1 263.649 6.51000   4
   3  -3  -1 262.290 6.83366   2
   3  -3  -1 261.355 6.69179   3
   3  -3  -1 267.979 7.14785   1
   3  -3  -1 261.655 6.60283   3
  -3   3   1 260.753 6.44509   3
  -3   3   1 258.320 6.83857   2
  -3   3   1 263.561 6.51865   4
  -3   3   1 256.178 6.49184   3
  -3   3   1 261.587 7.20582   5
   2  -3  -1 34.3776 1.43299   4
   2  -3  -1 30.1080 1.61098   3
   2  -3  -1 29.4709 1.92908   1
   2  -3  -1 28.9927 1.63602   2
   2  -3  -1 31.7140 1.73669   3
  -2   3   1 31.0109 1.69318   2
  -2   3   1 30.4078 1.57633   3
  -2   3   1 35.1948 1.35208   4
  -2   3   1 31.5902 1.49450   3
   1  -3  -1 164.923 4.66592   1
   1  -3  -1 164.223 4.43025   3
   1  -3  -1 165.400 4.27725   4
   1  -3  -1 163.736 4.39321   2
   1  -3  -1 164.361 4.48841   3
  -1   3   1 160.887 4.49303   3
  -1   3   1 165.571 4.68500   1
  -1   3   1 173.449 4.41318   3
  -1   3   1 169.278 4.42225   2
  -1   3   1 160.224 4.21982   4
   0  -3  -1 1722.49 41.2801   2
   0  -3  -1 1834.34 41.2107   1
   0  -3  -1 1748.34 41.5117   7
   0  -3  -1 1762.14 41.0244   3
   0  -3  -1 1737.64 41.1448   4
   0  -3  -1 1751.56 40.9094   3
   0   3   1 1734.10 40.3621   1
   0   3   1 1749.95 40.1405   2
   0   3   1 1738.93 40.8164   3
   0   3   1 1756.17 40.2934   3
   0   3   1 1779.14 40.6828   4
  -1  -3  -1 81.5690 2.46454   7
  -1  -3  -1 77.9689 2.33079   2
  -1  -3  -1 82.0928 2.37222   3
  -1  -3  -1 80.5343 2.53195   3
  -1  -3  -1 80.8369 2.62523   1
   1   3   1 82.8259 2.44434   3
   1   3   1 80.8930 2.34164   2
   1   3   1 85.3585 2.44537   7
   1   3   1 84.0504 2.67228   1
   1   3   1 82.0272 2.58471   3
  -2  -3  -1 67.1085 2.28001   6
  -2  -3  -1 65.3341 2.34322   7
  -2  -3  -1 68.6923 2.32409   1
  -2  -3  -1 66.9922 1.93675   3
  -2  -3  -1 67.7801 2.04133   3
   2   3   1 65.3766 2.13507   3
   2   3   1 68.2433 2.32583   7
   2   3   1 65.5242 2.34779   1
   2   3   1 67.1314 2.02107   3
   2   3   1 68.7311 2.19514   6
   2   3   1 67.8914 2.06061   2
  -3  -3  -1 230.717 5.87681   1
  -3  -3  -1 222.557 5.86982   6
  -3  -3  -1 225.690 6.03204   7
   3   3   1 223.655 5.89391   1
   3   3   1 231.320 5.86465   6
   3   3   1 218.747 5.95861   7
   3   3   1 224.387 5.46014   3
   3   3   1 223.933 5.39010   3
  -4  -3  -1 49.0659 2.11551   6
  -4  -3  -1 52.0128 2.23354   7
  -4  -3  -1 50.4628 2.17792   1
   4   3   1 51.8731 1.30186   3
   4   3   1 51.8236 2.09455   6
   4   3   1 51.0415 1.31399   3
   4   3   1 55.2834 2.15898   1
   4   3   1 52.4721 2.28369   7
  -5  -3  -1 1155.46 27.0378   1
  -5  -3  -1 1174.85 27.3322   7
  -5  -3  -1 1127.10 27.0789   6
   5   3   1 1155.46 27.2483   7
   5   3   1 1144.80 27.0324   6
   5   3   1 1161.83 27.0764   1
  -6  -3  -1 133.887 4.30194   6
   6   3   1 137.209 4.22695   6
   6   3   1 135.650 4.46595   7
   6   3   1 138.681 4.28501   1
   7   3   1 152.907 5.04537   7
   7   3   1 158.999 4.87869   6
   7   3   1 159.442 4.91873   1
   8   3   1 181.393 6.42005   5
   8   3   1 186.286 5.74198   1
   8   3   1 182.657 5.80584   7
   8   3   1 180.222 5.56883   6
   9   3   1 68.9342 2.99835   6
   9   3   1 61.2083 2.98124   1
   9   3   1 56.6800 3.41769   7
  10   3   1 239.870 7.34059   1
  10   3   1 239.750 7.06708   2
  11   3   1 1.83898 1.22294   1
  11   3   1 1.17591 1.05402   4
  11   3   1 2.72112 1.29402   2
  12   3   1 1.48492 1.37190   2
  12   3   1 1.46496 1.49485   1
  12   3   1 1.20477 1.23484   4
  13   3   1 -1.4537 1.17647   4
  13   3   1 1.52976 1.49794   1
  13   3   1 1.01938 1.27745   2
  14   3   1 19.9470 2.49043   2
  14   3   1 21.0679 2.51231   4
  14   3   1 22.4196 2.59963   1
  15   3   1 73.5834 3.94008   2
  15   3   1 72.2762 4.23991   1
  15   3   1 70.5440 3.89816   4
  16   3   1 -0.3764 1.58649   2
  16   3   1 -0.2742 1.64884   1
  16   3   1 -4.4738 1.53659   4
  17   3   1 8.73562 2.32256   1
  17   3   1 7.98696 2.15610   4
  17   3   1 5.48345 2.06189   2
  18   3   1 6.62150 2.46957   1
  18   3   1 5.42603 2.19362   4
  18   3   1 5.03814 2.18488   2
  17  -4  -1 11.1242 2.82256   2
  16  -4  -1 5.61195 2.20252   2
  15  -4  -1 3.56120 1.92975   2
  15  -4  -1 -1.6511 1.29590   4
  14  -4  -1 75.6571 3.74040   4
  14  -4  -1 83.5753 4.75321   2
 -14   4   1 79.9160 6.17226   5
  13  -4  -1 2.41476 1.41074   4
  13  -4  -1 2.91895 1.20577   3
  13  -4  -1 7.11316 2.11903   2
 -13   4   1 0.98516 2.47098   5
  12  -4  -1 28.3845 2.11675   3
  12  -4  -1 26.5961 2.25086   4
  12  -4  -1 28.6336 2.83640   2
  12  -4  -1 25.8504 1.94204   3
 -12   4   1 28.9591 3.86641   5
  11  -4  -1 0.29747 1.32163   7
  11  -4  -1 1.53770 1.09253   3
  11  -4  -1 2.03710 1.53264   2
  11  -4  -1 -0.2293 1.09347   4
  11  -4  -1 0.13080 0.91175   3
 -11   4   1 0.90614 2.08947   5
  10  -4  -1 142.852 4.67325   4
  10  -4  -1 128.288 5.15366   2
  10  -4  -1 144.139 4.52766   3
  10  -4  -1 137.997 4.34926   3
 -10   4   1 139.812 6.08643   5
 -10   4   1 143.523 4.75115   4
   9  -4  -1 49.9837 2.28414   3
   9  -4  -1 51.5572 3.00135   2
   9  -4  -1 49.3676 2.43897   4
   9  -4  -1 49.8903 2.40811   3
  -9   4   1 47.8083 2.52782   4
  -9   4   1 48.8171 3.52716   5
   8  -4  -1 45.5722 2.21785   3
   8  -4  -1 43.8577 2.11221   3
   8  -4  -1 46.8559 3.46036   5
   8  -4  -1 41.7572 2.67316   2
   8  -4  -1 46.9523 2.25828   4
  -8   4   1 42.4048 3.42633   5
  -8   4   1 44.5707 2.30651   4
   7  -4  -1 2.30923 0.89969   3
   7  -4  -1 4.16292 1.03585   3
   7  -4  -1 3.29504 0.95523   4
   7  -4  -1 2.12830 1.20613   2
   7  -4  -1 4.71425 1.61519   5
  -7   4   1 3.77955 1.27462   2
  -7   4   1 2.75185 1.04945   4
  -7   4   1 0.00403 1.46615   5
   6  -4  -1 609.488 15.6735   5
   6  -4  -1 585.841 14.5676   3
   6  -4  -1 595.421 15.1678   2
   6  -4  -1 604.504 14.6456   4
   6  -4  -1 621.030 14.7409   3
  -6   4   1 632.447 15.2945   2
  -6   4   1 580.971 15.6832   5
  -6   4   1 596.700 14.6843   4
   5  -4  -1 75.8858 2.79127   3
   5  -4  -1 71.9520 3.02394   2
   5  -4  -1 73.6008 2.61054   4
   5  -4  -1 77.0298 2.68102   3
  -5   4   1 70.1786 3.46528   5
  -5   4   1 72.6980 2.61586   4
  -5   4   1 75.3209 2.20997   3
  -5   4   1 75.5274 2.23307   3
  -5   4   1 70.1611 3.00818   2
   4  -4  -1 184.886 5.48606   1
   4  -4  -1 172.473 4.93689   3
   4  -4  -1 172.778 4.69037   4
   4  -4  -1 168.909 5.07186   2
   4  -4  -1 173.220 4.83050   3
  -4   4   1 169.717 5.49189   5
  -4   4   1 171.432 5.13387   2
  -4   4   1 174.677 4.77916   4
  -4   4   1 165.475 4.59309   3
  -4   4   1 169.584 4.54075   3
   3  -4  -1 307.355 8.03239   2
   3  -4  -1 313.675 8.32553   1
   3  -4  -1 312.938 7.88694   3
   3  -4  -1 304.635 7.97328   3
   3  -4  -1 310.131 7.71393   4
  -3   4   1 310.521 7.72000   3
  -3   4   1 298.015 7.78858   3
  -3   4   1 306.195 7.72080   4
  -3   4   1 308.787 8.04188   2
  -3   4   1 318.048 8.43914   5
   2  -4  -1 29.2208 1.69361   2
   2  -4  -1 30.3202 2.04130   1
   2  -4  -1 31.7651 1.56610   4
   2  -4  -1 32.0157 1.78435   3
   2  -4  -1 29.1038 1.73189   3
  -2   4   1 32.6654 1.65181   3
  -2   4   1 34.9674 1.81154   3
  -2   4   1 32.0356 2.09375   1
  -2   4   1 28.3569 1.72146   2
  -2   4   1 31.1017 1.43892   4
   1  -4  -1 43.6682 1.89863   2
   1  -4  -1 46.4839 1.81104   4
   1  -4  -1 40.7075 2.00904   3
   1  -4  -1 44.8832 2.19521   3
   1  -4  -1 42.4865 2.26710   1
  -1   4   1 46.7754 2.36598   1
  -1   4   1 46.0227 1.99698   3
  -1   4   1 45.6932 1.75940   4
  -1   4   1 45.9664 1.84852   2
  -1   4   1 42.5058 2.17091   3
   0  -4  -1 167.759 4.54884   2
   0  -4  -1 170.177 4.59474   4
   0  -4  -1 176.338 4.79863   3
   0  -4  -1 169.627 4.65210   3
   0  -4  -1 176.913 4.95657   1
   0  -4  -1 168.609 4.47364   7
   0   4   1 169.300 4.95189   1
   0   4   1 176.965 4.59947   2
   0   4   1 173.152 4.65782   3
   0   4   1 168.162 4.55933   4
   0   4   1 163.888 4.77354   3
  -1  -4  -1 572.817 13.5561   2
  -1  -4  -1 581.507 13.6830   7
  -1  -4  -1 566.931 13.7256   3
  -1  -4  -1 558.032 13.6256   3
  -1  -4  -1 589.459 13.8937   1
   1   4   1 571.781 13.8042   3
   1   4   1 572.948 13.6808   4
   1   4   1 578.728 13.5654   2
   1   4   1 577.463 13.6402   7
   1   4   1 578.374 13.6823   3
   1   4   1 570.221 13.9053   1
  -2  -4  -1 338.032 8.13983   2
  -2  -4  -1 331.935 8.11461   3
  -2  -4  -1 333.475 8.35427   6
  -2  -4  -1 329.749 8.41428   7
  -2  -4  -1 342.407 8.21880   3
  -2  -4  -1 330.221 8.44628   1
   2   4   1 335.427 8.20181   3
   2   4   1 349.629 8.14520   2
   2   4   1 321.820 8.47619   1
   2   4   1 333.583 8.32343   3
   2   4   1 333.706 8.37892   7
  -3  -4  -1 10.4404 1.28692   7
  -3  -4  -1 9.17981 0.69055   3
  -3  -4  -1 7.66135 1.08893   1
  -3  -4  -1 10.2357 0.76894   3
  -3  -4  -1 11.8636 1.23231   6
   3   4   1 10.8293 0.89094   2
   3   4   1 12.8344 1.19594   6
   3   4   1 10.9772 1.13138   7
   3   4   1 9.91427 1.23329   1
   3   4   1 10.2194 0.87209   3
   3   4   1 10.4867 0.99336   3
  -4  -4  -1 -0.1767 1.02411   7
  -4  -4  -1 1.04729 0.88751   6
  -4  -4  -1 0.47333 0.82576   1
   4   4   1 0.07705 0.90711   7
   4   4   1 1.86209 0.85962   6
   4   4   1 -0.2350 0.55703   3
   4   4   1 1.27905 0.49248   3
   4   4   1 1.24429 0.97762   1
  -5  -4  -1 517.621 12.7520   1
  -5  -4  -1 514.958 12.7648   6
  -5  -4  -1 517.069 13.0210   7
   5   4   1 532.067 12.7401   6
   5   4   1 506.509 12.9211   7
   5   4   1 510.037 12.7901   1
   5   4   1 510.573 11.9368   3
   5   4   1 510.448 11.9065   3
  -6  -4  -1 118.506 3.88889   6
  -6  -4  -1 113.267 3.80647   1
  -6  -4  -1 110.685 4.09168   7
   6   4   1 110.795 3.77994   6
   6   4   1 112.991 3.87662   1
   6   4   1 114.902 4.04053   7
  -8  -4  -1 226.991 6.70810   6
   8   4   1 218.373 6.80761   7
   8   4   1 221.908 6.65450   1
   8   4   1 230.454 6.63014   6
   9   4   1 191.559 5.95328   6
   9   4   1 188.302 6.03948   1
  10   4   1 3.54358 1.37180   1
  11   4   1 104.623 4.36389   1
  11   4   1 102.329 4.01242   2
  12   4   1 0.76397 1.27603   2
  12   4   1 -0.9669 1.19748   4
  12   4   1 0.93645 1.37406   1
  13   4   1 23.1143 2.34045   2
  13   4   1 22.0660 2.54407   1
  13   4   1 26.0720 2.52318   4
  14   4   1 -1.1787 1.22938   2
  14   4   1 1.09943 1.51578   1
  14   4   1 -0.2673 1.57624   4
  15   4   1 10.8947 2.24469   1
  15   4   1 17.5680 2.50410   4
  15   4   1 19.4765 2.47968   2
  16   4   1 9.52704 1.99369   2
  16   4   1 10.7335 2.60364   1
  16   4   1 11.1591 2.17701   4
  17   4   1 1.29213 1.81429   4
  17   4   1 -2.4074 1.59093   2
  17   4   1 -3.7638 1.81782   1
  18   4   1 1.36301 1.67372   2
  18   4   1 -1.6790 1.75370   1
  18   4   1 -3.0702 1.77766   4
  17  -5  -1 5.21490 2.28548   2
  16  -5  -1 -0.0581 2.19758   2
  15  -5  -1 22.0981 2.96072   2
  15  -5  -1 13.2937 2.09780   4
 -15   5   1 15.0729 3.63261   5
  14  -5  -1 0.39149 1.42417   4
  14  -5  -1 6.54056 2.12833   2
 -14   5   1 3.95187 2.64852   5
  13  -5  -1 6.71867 1.46231   3
  13  -5  -1 9.62025 2.41418   2
  13  -5  -1 7.85352 1.62296   4
 -13   5   1 12.8788 2.98691   5
  12  -5  -1 0.77929 1.16954   3
  12  -5  -1 0.83588 1.21887   4
  12  -5  -1 1.35824 1.69230   2
 -12   5   1 -2.3417 2.01728   5
  11  -5  -1 8.88316 1.43805   3
  11  -5  -1 5.88702 1.37720   4
  11  -5  -1 7.22734 1.52141   3
  11  -5  -1 4.68799 1.78560   2
 -11   5   1 10.9388 2.61216   5
  10  -5  -1 56.6716 2.85689   3
  10  -5  -1 48.3034 2.59648   3
  10  -5  -1 55.8711 2.73498   4
  10  -5  -1 56.5247 3.41663   2
 -10   5   1 54.6780 2.85670   4
 -10   5   1 59.6165 4.30211   5
   9  -5  -1 1.27544 0.98787   4
   9  -5  -1 2.76541 1.06711   3
   9  -5  -1 1.08161 1.05886   3
   9  -5  -1 0.83850 1.36847   2
  -9   5   1 1.21808 1.61758   5
  -9   5   1 1.05564 1.06223   4
   8  -5  -1 22.2767 1.86549   3
   8  -5  -1 21.4262 1.60815   4
   8  -5  -1 20.2012 1.67405   3
   8  -5  -1 18.1228 2.08881   2
  -8   5   1 22.4938 1.89663   4
  -8   5   1 22.1236 2.61031   5
   7  -5  -1 243.825 6.74665   3
   7  -5  -1 246.396 7.33233   2
   7  -5  -1 251.149 6.92710   3
   7  -5  -1 239.277 6.70422   4
  -7   5   1 234.026 7.80896   5
  -7   5   1 243.154 6.81268   4
   6  -5  -1 1.77179 1.43811   1
   6  -5  -1 0.60640 0.89204   2
   6  -5  -1 0.59000 0.96271   3
   6  -5  -1 0.67593 1.07685   3
   6  -5  -1 1.40481 0.90727   4
  -6   5   1 -0.6139 1.31901   5
  -6   5   1 1.02180 0.52753   3
  -6   5   1 2.32088 0.99838   2
  -6   5   1 1.26373 0.56805   3
  -6   5   1 1.57623 0.84823   4
   5  -5  -1 15.7257 1.74046   1
   5  -5  -1 15.9112 1.37105   4
   5  -5  -1 13.9084 1.59617   2
   5  -5  -1 14.2570 1.54987   3
   5  -5  -1 13.1767 1.41546   3
  -5   5   1 11.9736 1.09702   3
  -5   5   1 15.6824 1.68692   2
  -5   5   1 16.2579 1.39219   4
  -5   5   1 17.5616 2.08487   5
  -5   5   1 12.5774 1.07721   3
   4  -5  -1 721.237 18.1030   1
   4  -5  -1 728.173 17.3893   4
   4  -5  -1 727.818 17.6930   3
   4  -5  -1 726.492 17.5517   3
   4  -5  -1 720.197 17.7682   2
  -4   5   1 713.454 17.2718   3
  -4   5   1 747.437 17.4382   4
  -4   5   1 722.928 18.2089   5
  -4   5   1 730.712 17.3992   3
  -4   5   1 738.891 17.8442   2
   3  -5  -1 65.3702 2.64989   3
   3  -5  -1 58.2664 2.56469   3
   3  -5  -1 65.0625 2.40313   4
   3  -5  -1 63.5065 2.94302   1
   3  -5  -1 61.3515 2.61001   2
  -3   5   1 60.7259 2.55175   3
  -3   5   1 66.8474 2.60797   2
  -3   5   1 60.5736 2.27889   4
  -3   5   1 60.7621 2.37105   3
   2  -5  -1 182.258 5.25944   3
   2  -5  -1 176.147 5.05819   2
   2  -5  -1 173.697 4.86140   4
   2  -5  -1 181.622 5.42293   1
   2  -5  -1 169.777 5.01021   3
  -2   5   1 180.927 5.47300   1
  -2   5   1 175.131 5.08723   2
  -2   5   1 182.433 5.17622   3
  -2   5   1 174.612 4.94177   3
  -2   5   1 176.140 4.87373   4
   1  -5  -1 8.27900 1.12720   4
   1  -5  -1 8.77294 1.17525   3
   1  -5  -1 7.61565 1.06650   2
   1  -5  -1 7.94724 1.36774   1
   1  -5  -1 9.06668 1.32189   3
  -1   5   1 9.15254 1.12659   2
  -1   5   1 10.8999 1.42295   3
  -1   5   1 7.47874 0.95773   4
  -1   5   1 7.03980 1.35655   1
  -1   5   1 7.69718 1.08567   3
   0  -5  -1 247.235 6.38928   3
   0  -5  -1 237.805 6.45087   1
   0  -5  -1 236.172 6.16054   4
   0  -5  -1 232.765 6.02307   7
   0  -5  -1 232.052 6.08451   2
   0  -5  -1 229.656 6.19218   3
   0   5   1 237.512 6.13009   2
   0   5   1 225.659 6.21864   3
   0   5   1 230.841 6.41868   3
   0   5   1 232.581 6.47469   1
   0   5   1 223.809 6.07102   4
  -1  -5  -1 13.0343 1.37855   3
  -1  -5  -1 11.4823 1.04472   2
  -1  -5  -1 9.91008 1.14573   3
  -1  -5  -1 12.0163 1.21113   7
  -1  -5  -1 10.5060 1.22329   1
   1   5   1 9.52864 1.10942   3
   1   5   1 10.5082 1.06850   7
   1   5   1 10.3626 1.28496   1
   1   5   1 11.7926 1.03600   2
   1   5   1 12.0643 1.16807   4
   1   5   1 11.4833 1.40061   3
  -2  -5  -1 116.677 3.83279   1
  -2  -5  -1 121.089 3.61472   3
  -2  -5  -1 120.301 3.45003   3
  -2  -5  -1 116.587 3.37769   2
  -2  -5  -1 120.185 3.74782   7
   2   5   1 125.203 3.56336   3
   2   5   1 121.198 3.65585   7
   2   5   1 116.378 3.74980   3
   2   5   1 113.662 3.61926   4
   2   5   1 122.686 3.42398   2
   2   5   1 114.371 3.87960   1
  -3  -5  -1 65.9568 2.23765   3
  -3  -5  -1 65.3788 2.14468   3
  -3  -5  -1 69.2635 2.69805   1
  -3  -5  -1 65.8616 2.29930   2
  -3  -5  -1 63.8818 2.53651   6
  -3  -5  -1 67.2239 2.70034   7
   3   5   1 66.5301 2.51065   3
   3   5   1 66.9900 2.21920   2
   3   5   1 65.4315 2.62191   1
   3   5   1 66.7596 2.60683   7
   3   5   1 70.0474 2.35051   3
  -4  -5  -1 1.35529 0.42001   3
  -4  -5  -1 2.76492 1.11262   7
  -4  -5  -1 2.39869 0.48715   3
  -4  -5  -1 2.55128 0.97659   6
  -4  -5  -1 0.44911 0.94675   1
   4   5   1 1.38636 0.99491   7
   4   5   1 2.27944 1.07204   1
   4   5   1 2.37749 0.69576   3
   4   5   1 3.29445 0.82656   3
   4   5   1 1.28779 0.86792   6
   4   5   1 1.50243 0.61568   2
  -5  -5  -1 373.355 9.66409   6
  -5  -5  -1 378.750 9.97670   7
  -5  -5  -1 376.158 9.72971   1
   5   5   1 380.630 9.61924   6
   5   5   1 375.854 9.03169   3
   5   5   1 378.735 9.80823   1
   5   5   1 367.985 9.08809   3
   5   5   1 364.371 9.83962   7
  -6  -5  -1 25.1800 1.93606   6
  -6  -5  -1 32.6316 2.15990   7
  -6  -5  -1 27.2757 1.96967   1
   6   5   1 33.6789 2.06209   7
   6   5   1 25.6390 1.83469   6
   6   5   1 26.2893 1.26107   3
   6   5   1 25.7982 2.03234   1
   6   5   1 25.2423 1.16585   3
  -7  -5  -1 120.380 4.25148   6
  -7  -5  -1 121.425 4.22878   1
  -7  -5  -1 122.277 4.59189   7
   7   5   1 129.423 4.51651   7
   7   5   1 121.634 4.32579   1
   7   5   1 119.723 3.12017   3
   7   5   1 120.129 3.15367   3
   7   5   1 128.304 4.21390   6
  -8  -5  -1 8.93795 1.53146   6
  -8  -5  -1 7.12676 1.65181   7
   8   5   1 7.37753 0.48534   3
   8   5   1 8.39871 0.46627   3
   8   5   1 7.79657 1.35148   6
   8   5   1 8.95886 1.64671   1
  -9  -5  -1 41.8041 2.57456   6
   9   5   1 40.6053 2.90088   6
   9   5   1 36.4787 2.52804   1
  10   5   1 22.2094 2.21271   1
  11   5   1 92.9140 4.31741   1
  12   5   1 41.6453 3.08336   1
  12   5   1 43.2932 2.65752   2
  13   5   1 34.7690 2.81754   2
  13   5   1 35.6476 3.26156   1
  14   5   1 15.5379 2.04889   2
  14   5   1 14.8004 2.29747   1
  14   5   1 13.3664 2.06927   4
  15   5   1 2.03034 1.49817   2
  15   5   1 1.39166 1.56349   4
  15   5   1 0.43795 1.68517   1
  16   5   1 27.8732 3.19416   1
  16   5   1 26.4435 2.87422   4
  16   5   1 29.1203 2.87783   2
  17   5   1 1.26309 1.90250   1
  17   5   1 2.01370 1.66187   4
  17   5   1 0.17705 1.70301   2
  18   5   1 1.35112 1.90712   2
  18   5   1 3.30519 2.22602   1
  18   5   1 5.38753 2.17592   4
  16  -6  -1 2.31757 2.19471   2
 -16   6   1 6.27585 3.50819   5
  15  -6  -1 17.5078 2.21976   4
  15  -6  -1 13.4774 2.76234   2
 -15   6   1 14.6842 3.43263   5
  14  -6  -1 6.34351 1.93037   3
  14  -6  -1 9.93173 2.40337   2
  14  -6  -1 4.78276 1.60377   4
 -14   6   1 10.4172 3.45914   5
  13  -6  -1 29.6330 3.12448   2
  13  -6  -1 25.7709 2.38706   4
  13  -6  -1 25.5026 2.37278   3
 -13   6   1 29.9220 3.89372   5
  12  -6  -1 13.9228 1.83277   4
  12  -6  -1 11.9651 2.33081   2
  12  -6  -1 12.7684 1.81769   3
 -12   6   1 14.1178 3.22246   5
  11  -6  -1 13.0287 1.74017   3
  11  -6  -1 12.1114 2.16913   2
  11  -6  -1 12.1397 1.68734   4
 -11   6   1 9.92492 2.62058   5
  10  -6  -1 5.43665 1.21682   4
  10  -6  -1 3.69109 1.68214   2
  10  -6  -1 7.44875 1.43708   3
 -10   6   1 8.16594 2.48820   5
   9  -6  -1 30.7829 2.16252   4
   9  -6  -1 28.9399 2.20480   3
   9  -6  -1 30.5322 3.48316   3
   9  -6  -1 30.3612 2.70422   2
  -9   6   1 31.0386 2.29017   4
  -9   6   1 31.8700 3.41442   5
   8  -6  -1 32.4767 2.30258   3
   8  -6  -1 38.3901 2.22772   4
   8  -6  -1 36.8990 2.48849   2
   8  -6  -1 40.6911 2.58593   3
  -8   6   1 37.1942 2.22602   4
  -8   6   1 38.3797 3.29584   5
   7  -6  -1 29.6240 2.44612   2
   7  -6  -1 25.4993 1.89029   4
   7  -6  -1 25.8443 2.01983   3
   7  -6  -1 26.4671 2.17553   3
  -7   6   1 27.4859 2.05618   4
  -7   6   1 25.7404 1.19218   3
  -7   6   1 29.3899 2.81500   5
  -7   6   1 29.0047 1.18672   3
   6  -6  -1 223.388 6.35584   4
   6  -6  -1 232.182 6.74808   3
   6  -6  -1 220.168 6.52351   3
   6  -6  -1 224.636 6.90018   2
   6  -6  -1 240.125 8.03419   1
  -6   6   1 229.490 7.49346   5
  -6   6   1 226.137 6.00316   3
  -6   6   1 225.795 5.93369   3
  -6   6   1 229.697 6.43584   4
   5  -6  -1 63.8815 2.84536   3
   5  -6  -1 61.6352 2.66387   4
   5  -6  -1 65.7624 3.08197   2
   5  -6  -1 63.7463 3.00394   3
   5  -6  -1 65.3811 3.16793   1
  -5   6   1 65.6075 2.46750   3
  -5   6   1 68.4793 3.16085   2
  -5   6   1 62.6193 2.70523   4
  -5   6   1 68.6593 2.63114   3
  -5   6   1 63.3397 3.42156   5
   4  -6  -1 3.85122 1.16025   3
   4  -6  -1 1.26412 1.32994   1
   4  -6  -1 2.08650 1.17055   2
   4  -6  -1 1.47911 1.22430   3
   4  -6  -1 0.03582 0.92904   4
  -4   6   1 -0.0453 1.10422   2
  -4   6   1 -1.0292 0.80868   3
  -4   6   1 2.31385 1.04713   3
  -4   6   1 1.54802 0.84672   4
  -4   6   1 2.50339 1.44155   5
   3  -6  -1 81.8215 3.55619   1
   3  -6  -1 79.7039 3.37099   3
   3  -6  -1 87.8652 3.26678   2
   3  -6  -1 87.3347 2.97276   4
   3  -6  -1 83.4164 3.15829   3
  -3   6   1 82.5193 3.25256   2
  -3   6   1 77.0337 3.56806   1
  -3   6   1 86.0125 3.25903   3
  -3   6   1 86.3061 3.06430   3
  -3   6   1 82.7483 2.91610   4
   2  -6  -1 15.2691 1.57816   3
   2  -6  -1 13.4467 1.71457   1
   2  -6  -1 14.5116 1.35428   2
   2  -6  -1 13.0051 1.43835   3
   2  -6  -1 13.0051 1.27830   4
  -2   6   1 14.0064 1.43957   2
  -2   6   1 15.7985 1.34026   4
  -2   6   1 14.4103 1.37938   3
  -2   6   1 14.8551 1.66074   1
  -2   6   1 14.1568 1.53574   3
   1  -6  -1 54.2252 2.50579   3
   1  -6  -1 47.3121 2.61351   1
   1  -6  -1 46.9612 2.15985   4
   1  -6  -1 52.3695 2.26352   2
   1  -6  -1 46.2632 2.28679   3
  -1   6   1 49.1097 2.11198   4
  -1   6   1 50.4740 2.74151   1
  -1   6   1 53.1391 2.28036   2
  -1   6   1 53.1897 2.62551   3
  -1   6   1 51.9371 2.38877   3
   0  -6  -1 27.8521 1.93292   3
   0  -6  -1 30.0794 1.86790   1
   0  -6  -1 26.3820 1.71797   4
   0  -6  -1 27.4578 1.65670   7
   0  -6  -1 26.4629 1.61385   2
   0  -6  -1 28.1776 1.91638   3
   0   6   1 28.7983 1.67111   2
   0   6   1 28.8102 2.00122   3
   0   6   1 25.2745 1.62198   4
   0   6   1 29.1969 1.93245   1
   0   6   1 30.9025 1.81655   3
  -1  -6  -1 179.474 5.43133   1
  -1  -6  -1 182.660 5.14913   4
  -1  -6  -1 173.163 5.06866   3
  -1  -6  -1 191.626 5.33395   3
  -1  -6  -1 178.678 4.93036   2
  -1  -6  -1 190.295 5.12799   7
   1   6   1 175.551 5.15051   3
   1   6   1 183.605 5.12071   4
   1   6   1 172.848 5.28705   3
   1   6   1 174.132 4.93508   2
   1   6   1 177.262 5.48799   1
  -2  -6  -1 303.354 8.07986   1
  -2  -6  -1 305.674 7.58620   2
  -2  -6  -1 301.654 7.78889   3
  -2  -6  -1 302.216 7.92027   7
  -2  -6  -1 300.950 7.68263   3
   2   6   1 291.025 7.93411   3
   2   6   1 307.252 7.87870   4
   2   6   1 293.790 7.79140   7
   2   6   1 292.404 7.56058   2
   2   6   1 296.317 8.13350   1
   2   6   1 295.461 7.76391   3
  -3  -6  -1 267.976 7.48936   7
  -3  -6  -1 288.150 7.12301   3
  -3  -6  -1 275.422 7.01083   3
  -3  -6  -1 273.433 7.04903   2
  -3  -6  -1 269.571 7.37299   6
  -3  -6  -1 274.464 7.54485   1
   3   6   1 272.118 7.36681   4
   3   6   1 280.846 7.43779   7
   3   6   1 271.713 7.60726   1
   3   6   1 281.745 7.21384   3
   3   6   1 275.861 7.34846   3
   3   6   1 275.861 7.01653   2
  -4  -6  -1 2.19055 0.66910   3
  -4  -6  -1 0.62870 0.58588   3
  -4  -6  -1 0.80593 1.12916   7
  -4  -6  -1 1.97471 1.02563   6
  -4  -6  -1 -0.5187 0.99567   1
   4   6   1 0.79643 0.73912   3
   4   6   1 0.78175 1.11906   1
   4   6   1 0.75679 0.73409   2
   4   6   1 1.21880 0.92319   3
   4   6   1 2.27110 1.12586   7
  -5  -6  -1 30.0516 2.07206   1
  -5  -6  -1 28.8540 0.95554   3
  -5  -6  -1 29.2081 0.97229   3
  -5  -6  -1 29.2363 2.30165   7
  -5  -6  -1 28.6036 2.01304   6
   5   6   1 27.0266 1.46508   2
   5   6   1 31.2078 2.12155   7
   5   6   1 29.4109 1.94432   1
   5   6   1 30.6236 1.74144   3
   5   6   1 28.2044 1.83943   6
   5   6   1 29.3280 1.59079   3
  -6  -6  -1 179.126 5.49683   6
  -6  -6  -1 178.329 5.82421   7
  -6  -6  -1 176.636 5.53991   1
   6   6   1 173.358 5.62343   1
   6   6   1 175.279 5.65357   7
   6   6   1 183.713 4.79600   3
   6   6   1 175.817 5.37490   6
   6   6   1 182.162 4.90557   3
   6   6   1 180.895 4.99116   2
  -7  -6  -1 136.775 4.96323   7
  -7  -6  -1 130.628 4.52663   6
  -7  -6  -1 131.512 4.54664   1
   7   6   1 133.131 4.71407   1
   7   6   1 129.589 4.41329   6
   7   6   1 129.650 3.65171   3
   7   6   1 130.097 3.71785   3
   7   6   1 135.613 4.76895   7
  -8  -6  -1 253.175 7.55405   1
  -8  -6  -1 257.010 7.97710   7
  -8  -6  -1 263.570 7.65838   6
   8   6   1 263.025 7.72349   1
   8   6   1 258.721 7.50840   6
   8   6   1 259.144 6.42056   3
   8   6   1 259.449 6.46310   3
  -9  -6  -1 -1.6993 1.37286   7
  -9  -6  -1 2.29933 1.33819   6
   9   6   1 1.56377 1.29801   1
   9   6   1 -0.3784 0.42114   3
   9   6   1 -0.0871 0.47345   3
 -10  -6  -1 31.9787 2.61622   6
  10   6   1 29.0106 2.54676   1
  10   6   1 28.5578 1.13312   3
  10   6   1 25.9070 1.05544   3
  11   6   1 385.140 8.90320   3
  11   6   1 373.928 10.9416   1
  11   6   1 379.879 8.89667   3
  12   6   1 12.5143 2.24656   1
  12   6   1 10.0931 0.54552   3
  12   6   1 8.50798 0.55401   3
  13   6   1 41.1144 2.93809   2
  13   6   1 42.2790 3.41331   1
  14   6   1 3.72784 1.46314   2
  14   6   1 4.25171 2.07437   1
  15   6   1 45.6954 3.96372   1
  15   6   1 50.1865 3.38582   2
  15   6   1 37.0166 3.30313   4
  16   6   1 5.01387 2.06942   4
  16   6   1 3.90179 2.12096   1
  16   6   1 3.15467 1.84808   2
  17   6   1 2.55634 1.97066   4
  17   6   1 0.27091 1.90459   1
  17   6   1 -0.8699 1.70783   2
  18   6   1 9.64668 2.26591   4
  18   6   1 7.55190 2.30748   2
  18   6   1 10.2929 2.64857   1
  16  -7  -1 3.72788 2.69946   2
 -16   7   1 -0.5183 3.16908   5
  15  -7  -1 -1.1634 2.30469   2
 -15   7   1 1.49796 3.06949   5
  14  -7  -1 10.4016 1.99345   3
  14  -7  -1 12.0388 2.64471   2
  14  -7  -1 15.9443 2.08142   4
 -14   7   1 4.45764 2.78945   5
  13  -7  -1 10.9974 2.48419   2
  13  -7  -1 10.1691 1.96455   3
  13  -7  -1 10.6263 1.83460   4
 -13   7   1 13.0833 3.12058   5
  12  -7  -1 33.4842 2.69521   3
  12  -7  -1 31.2921 2.55920   4
  12  -7  -1 26.7314 3.06043   2
 -12   7   1 29.7136 3.97786   5
  11  -7  -1 17.7236 2.09179   3
  11  -7  -1 12.9165 2.34447   2
  11  -7  -1 14.9777 1.88783   4
 -11   7   1 11.9687 2.80935   5
  10  -7  -1 13.5232 1.85526   3
  10  -7  -1 11.7976 1.68894   4
  10  -7  -1 11.0895 2.17108   2
 -10   7   1 11.8794 2.55027   5
   9  -7  -1 48.0455 2.79640   3
   9  -7  -1 48.8164 3.32628   2
   9  -7  -1 50.9125 2.59583   4
  -9   7   1 46.2593 3.95565   5
   8  -7  -1 2.10528 1.02870   4
   8  -7  -1 1.33315 1.19248   3
   8  -7  -1 1.49848 1.39385   2
  -8   7   1 0.31541 1.59702   5
  -8   7   1 0.03296 0.24921   3
  -8   7   1 1.14233 1.03351   4
   7  -7  -1 130.658 4.96281   2
   7  -7  -1 128.745 4.34692   4
   7  -7  -1 129.802 4.59734   3
  -7   7   1 142.364 4.61863   4
  -7   7   1 129.773 3.82573   3
  -7   7   1 125.243 5.54153   5
  -7   7   1 132.027 3.79229   3
   6  -7  -1 3.57351 1.29531   3
   6  -7  -1 4.82803 1.21131   4
   6  -7  -1 4.58659 1.43865   2
   6  -7  -1 4.00178 1.33473   3
  -6   7   1 2.87531 0.90001   3
  -6   7   1 4.56263 1.13785   4
  -6   7   1 4.97565 1.08244   3
  -6   7   1 2.91310 1.62977   5
   5  -7  -1 35.0870 2.16926   4
   5  -7  -1 38.3952 2.30967   2
   5  -7  -1 37.1713 2.57956   3
   5  -7  -1 38.9981 2.32265   3
  -5   7   1 32.0204 2.01513   4
  -5   7   1 32.0022 1.95918   3
  -5   7   1 41.5285 2.88934   5
  -5   7   1 35.1511 2.18711   3
   4  -7  -1 99.5877 4.22953   1
   4  -7  -1 96.8945 3.71213   3
   4  -7  -1 99.3503 3.86373   2
   4  -7  -1 104.093 3.92341   3
   4  -7  -1 95.5791 3.46995   4
  -4   7   1 102.725 3.75713   3
  -4   7   1 103.519 3.94661   2
  -4   7   1 99.3609 3.48981   4
  -4   7   1 105.245 3.54488   3
   3  -7  -1 24.6715 2.05764   3
   3  -7  -1 23.5133 1.93734   2
   3  -7  -1 26.7698 2.37820   1
   3  -7  -1 26.4341 2.04468   3
   3  -7  -1 25.1687 1.78640   4
  -3   7   1 22.7827 1.82287   3
  -3   7   1 22.5932 1.69454   4
  -3   7   1 21.8387 1.95357   3
  -3   7   1 20.7649 1.88721   2
  -3   7   1 21.3241 2.20730   1
   2  -7  -1 352.576 9.58094   1
   2  -7  -1 347.393 9.01194   4
   2  -7  -1 349.932 9.32988   3
   2  -7  -1 328.585 9.09472   3
   2  -7  -1 338.113 9.06218   2
  -2   7   1 345.400 9.06445   3
  -2   7   1 324.907 9.20003   3
  -2   7   1 344.512 9.62219   1
  -2   7   1 356.829 9.19324   2
  -2   7   1 339.791 8.90557   4
   1  -7  -1 211.776 6.04809   4
   1  -7  -1 211.380 6.18529   3
   1  -7  -1 222.430 6.58206   1
   1  -7  -1 214.231 6.05260   2
   1  -7  -1 212.830 6.32470   3
  -1   7   1 210.091 5.97631   4
  -1   7   1 212.575 6.41456   3
  -1   7   1 217.298 6.10647   2
  -1   7   1 219.661 6.66680   1
  -1   7   1 214.065 6.15566   3
   0  -7  -1 3.65047 1.11820   4
   0  -7  -1 5.39199 1.09918   7
   0  -7  -1 4.61753 0.99625   2
   0  -7  -1 1.84350 1.24405   1
   0  -7  -1 4.68099 1.16841   3
   0  -7  -1 5.10262 1.31789   3
   0   7   1 4.42150 1.53361   1
   0   7   1 4.53440 1.35456   3
   0   7   1 5.12077 1.21511   3
   0   7   1 5.12191 1.06945   2
   0   7   1 5.03718 1.06141   4
  -1  -7  -1 9.04599 1.30492   3
  -1  -7  -1 9.98773 1.13181   2
  -1  -7  -1 10.9266 1.39225   4
  -1  -7  -1 10.8639 1.58772   1
  -1  -7  -1 9.47437 1.28574   7
  -1  -7  -1 12.3519 1.57395   3
   1   7   1 10.9227 1.42793   3
   1   7   1 9.67340 1.16920   2
   1   7   1 12.2788 1.36523   4
   1   7   1 9.98282 1.50040   3
   1   7   1 8.42569 1.61645   1
  -2  -7  -1 47.2005 2.04236   2
  -2  -7  -1 47.1321 2.25938   3
  -2  -7  -1 45.0710 2.57831   1
  -2  -7  -1 47.2072 2.37877   7
  -2  -7  -1 45.2559 2.36411   3
   2   7   1 46.3400 2.71234   1
   2   7   1 48.9280 2.32497   7
   2   7   1 46.0569 2.30114   4
   2   7   1 48.0452 2.07333   2
   2   7   1 51.7526 2.63686   3
   2   7   1 50.5545 2.29104   3
  -3  -7  -1 5.85671 0.92885   2
  -3  -7  -1 7.27716 1.23966   1
  -3  -7  -1 5.87402 0.99384   3
  -3  -7  -1 4.34747 1.29507   7
  -3  -7  -1 7.05853 1.26291   6
  -3  -7  -1 5.12602 1.08583   3
   3   7   1 7.46488 1.25318   7
   3   7   1 6.40044 0.93933   2
   3   7   1 6.86848 1.15690   3
   3   7   1 5.96316 1.24078   4
   3   7   1 6.56731 1.34174   3
   3   7   1 6.21746 1.44543   1
  -4  -7  -1 75.8068 2.60481   3
  -4  -7  -1 79.1350 2.69698   3
  -4  -7  -1 83.0343 3.42003   7
  -4  -7  -1 77.1424 2.72419   2
  -4  -7  -1 76.3796 3.13744   6
  -4  -7  -1 80.8265 3.32104   1
   4   7   1 75.0753 3.40855   1
   4   7   1 78.6068 3.13825   4
   4   7   1 82.7538 2.94282   3
   4   7   1 74.4816 3.05062   3
   4   7   1 78.4046 3.19769   7
   4   7   1 81.0531 2.71016   2
  -5  -7  -1 175.023 5.54432   1
  -5  -7  -1 173.825 5.68074   7
  -5  -7  -1 175.012 4.51012   3
  -5  -7  -1 176.121 4.53804   3
  -5  -7  -1 170.993 5.48572   6
   5   7   1 172.893 5.54239   7
   5   7   1 172.145 5.15075   3
   5   7   1 180.801 5.73629   1
   5   7   1 180.272 5.05341   3
   5   7   1 173.515 4.89628   2
  -6  -7  -1 44.8371 2.85256   7
  -6  -7  -1 47.1392 2.64322   1
  -6  -7  -1 40.2496 2.48016   6
   6   7   1 47.5661 2.69593   7
   6   7   1 46.5962 1.98922   2
   6   7   1 44.8196 2.77699   1
   6   7   1 43.9408 2.17854   3
   6   7   1 47.4653 2.07851   3
   6   7   1 43.8284 2.36337   6
  -7  -7  -1 28.2875 2.24771   1
  -7  -7  -1 31.4685 2.54957   7
  -7  -7  -1 30.0145 2.23674   6
   7   7   1 31.0019 1.65819   3
   7   7   1 32.8116 2.26985   6
   7   7   1 28.1229 2.40887   1
   7   7   1 30.1602 1.73074   2
   7   7   1 30.0739 1.75504   3
  -8  -7  -1 81.6078 3.65471   6
  -8  -7  -1 70.1972 3.81586   7
   8   7   1 80.6430 2.81265   3
   8   7   1 84.8974 3.79132   1
   8   7   1 81.1101 2.69331   3
  -9  -7  -1 182.225 6.46737   7
  -9  -7  -1 177.627 5.95205   6
   9   7   1 183.311 6.24535   1
   9   7   1 177.949 4.91926   3
   9   7   1 178.769 4.84711   3
 -10  -7  -1 8.28537 1.86132   6
 -10  -7  -1 5.98710 1.89801   7
  10   7   1 6.51878 0.88971   3
  10   7   1 8.26624 0.88894   3
  10   7   1 7.26746 1.94916   1
 -11  -7  -1 0.65079 1.38265   6
  11   7   1 0.50060 0.58453   3
  11   7   1 1.44870 1.73562   1
  11   7   1 0.41645 0.62399   3
  12   7   1 71.5747 2.32502   3
  12   7   1 70.9260 2.29495   3
  12   7   1 73.5393 4.14814   1
  13   7   1 6.18517 2.00081   1
  13   7   1 2.59285 0.68244   3
  14   7   1 3.15001 1.44049   2
  14   7   1 1.54484 2.07123   1
  15   7   1 13.4935 2.15237   2
  15   7   1 16.8736 2.70018   1
  16   7   1 3.00103 2.12621   1
  16   7   1 1.82458 1.65244   4
  16   7   1 2.58518 1.78697   2
  17   7   1 2.03211 1.79102   4
  17   7   1 2.70093 2.41364   1
  17   7   1 5.31638 1.93846   2
  18   7   1 20.5310 2.87513   4
  18   7   1 10.7766 2.81845   1
  15  -8  -1 5.90692 2.42598   2
 -15   8   1 3.47595 3.21528   5
  14  -8  -1 -0.1176 1.68507   3
  14  -8  -1 5.36428 2.25173   2
  14  -8  -1 2.71525 1.64787   4
 -14   8   1 5.61737 3.23307   5
  13  -8  -1 9.37806 2.35713   2
  13  -8  -1 7.39615 1.95119   3
  13  -8  -1 3.67883 1.62424   4
 -13   8   1 9.69380 2.88638   5
  12  -8  -1 30.8790 2.83668   3
  12  -8  -1 37.5301 3.48688   2
  12  -8  -1 29.5306 2.66601   4
 -12   8   1 23.9795 3.54448   5
  11  -8  -1 41.2738 2.67636   4
  11  -8  -1 36.6984 3.35953   2
  11  -8  -1 36.0547 2.93377   3
 -11   8   1 38.2611 4.04169   5
  10  -8  -1 48.4906 2.90731   4
  10  -8  -1 49.2773 3.20130   3
  10  -8  -1 39.8671 3.38116   2
 -10   8   1 50.4730 4.03491   5
   9  -8  -1 12.8863 1.74746   4
   9  -8  -1 7.24692 1.92730   2
   9  -8  -1 12.3116 1.89324   3
  -9   8   1 14.6044 2.84070   5
   8  -8  -1 -0.4526 1.22344   3
   8  -8  -1 -0.5671 1.44107   2
   8  -8  -1 0.88553 1.18493   4
  -8   8   1 -1.0650 1.89496   5
  -8   8   1 1.21490 0.68246   3
  -8   8   1 0.87991 0.63988   3
   7  -8  -1 168.194 5.82213   2
   7  -8  -1 159.241 5.45751   3
   7  -8  -1 159.965 5.23188   4
  -7   8   1 152.494 4.72433   3
  -7   8   1 159.515 6.24487   5
  -7   8   1 159.759 4.65606   3
   6  -8  -1 25.3955 1.92055   4
   6  -8  -1 24.1173 2.27908   2
   6  -8  -1 22.0218 2.17696   3
  -6   8   1 17.2491 1.64647   3
  -6   8   1 21.2139 1.66024   3
  -6   8   1 19.6019 2.51523   5
  -6   8   1 24.9167 2.08528   4
   5  -8  -1 156.941 4.91700   4
   5  -8  -1 152.545 5.21947   3
   5  -8  -1 145.672 5.25772   2
  -5   8   1 153.093 5.00529   3
  -5   8   1 153.238 4.90004   4
  -5   8   1 159.543 4.82753   3
  -5   8   1 144.750 5.71786   5
   4  -8  -1 -1.1354 1.20652   3
   4  -8  -1 0.72856 0.98991   4
   4  -8  -1 0.27695 1.16284   2
  -4   8   1 -0.2479 1.43586   1
  -4   8   1 0.02684 0.93709   3
  -4   8   1 0.43984 0.92683   4
  -4   8   1 0.02428 1.08363   3
   3  -8  -1 4.27542 1.31763   2
   3  -8  -1 4.82013 1.38912   3
   3  -8  -1 5.71139 1.32017   4
   3  -8  -1 4.24848 1.37810   3
   3  -8  -1 3.65102 1.62419   1
  -3   8   1 5.16788 1.18350   3
  -3   8   1 3.87269 1.06246   4
  -3   8   1 3.97141 1.30174   2
  -3   8   1 2.70943 1.55867   1
  -3   8   1 2.85087 1.38443   3
   2  -8  -1 718.026 17.8824   2
   2  -8  -1 742.664 18.2430   3
   2  -8  -1 732.912 17.7771   4
   2  -8  -1 725.465 18.0262   3
   2  -8  -1 738.827 18.4367   1
  -2   8   1 723.432 18.5176   1
  -2   8   1 726.350 17.7354   4
  -2   8   1 726.170 17.8824   3
  -2   8   1 730.954 17.9692   2
  -2   8   1 694.379 18.1038   3
   1  -8  -1 38.5122 2.38949   3
   1  -8  -1 45.3800 2.17415   7
   1  -8  -1 44.4470 2.60818   3
   1  -8  -1 39.1127 2.25733   4
   1  -8  -1 39.0118 2.77748   1
   1  -8  -1 42.3789 2.31484   2
  -1   8   1 41.1336 2.61622   3
  -1   8   1 36.2205 2.25624   3
  -1   8   1 38.9923 2.18410   4
  -1   8   1 38.2586 2.57738   1
  -1   8   1 38.6199 2.28179   2
   0  -8  -1 11.2029 1.78157   1
   0  -8  -1 9.55289 1.28329   2
   0  -8  -1 9.10518 1.52203   3
   0  -8  -1 9.31766 1.27388   4
   0  -8  -1 11.3361 1.38544   7
   0  -8  -1 9.45730 1.56623   3
   0   8   1 11.2358 1.44047   4
   0   8   1 8.54761 1.67004   3
   0   8   1 9.62869 1.39963   3
   0   8   1 7.10062 1.69175   1
   0   8   1 7.65432 1.26456   2
  -1  -8  -1 5.70362 1.12676   2
  -1  -8  -1 5.96325 1.28716   3
  -1  -8  -1 5.04558 1.12793   4
  -1  -8  -1 7.95165 1.62965   1
  -1  -8  -1 4.85206 1.19506   7
  -1  -8  -1 4.07685 1.41142   3
   1   8   1 5.78302 1.22951   4
   1   8   1 6.80087 1.17866   2
   1   8   1 5.01649 1.26010   3
   1   8   1 6.63141 1.63494   1
   1   8   1 3.98416 1.49281   3
  -2  -8  -1 368.663 9.57282   2
  -2  -8  -1 373.546 9.79638   3
  -2  -8  -1 359.358 9.91642   7
  -2  -8  -1 390.649 10.3118   1
  -2  -8  -1 385.269 9.92743   3
   2   8   1 366.737 10.1031   3
   2   8   1 379.312 9.91570   4
   2   8   1 382.876 9.95610   3
   2   8   1 386.406 9.65187   2
   2   8   1 375.236 10.3836   1
  -3  -8  -1 6.29097 1.13381   2
  -3  -8  -1 9.52133 1.62230   1
  -3  -8  -1 7.76031 1.22256   3
  -3  -8  -1 7.33079 1.25545   3
  -3  -8  -1 6.05844 1.44453   7
   3   8   1 7.09788 1.30174   7
   3   8   1 6.91623 1.26229   3
   3   8   1 8.87667 1.20956   2
   3   8   1 8.47695 1.52750   3
   3   8   1 6.46328 1.34500   4
   3   8   1 6.97607 1.73321   1
  -4  -8  -1 151.470 4.49930   3
  -4  -8  -1 141.784 4.87844   6
  -4  -8  -1 144.291 5.06655   7
  -4  -8  -1 148.872 4.49351   2
  -4  -8  -1 143.088 4.36687   3
  -4  -8  -1 151.301 5.13387   1
   4   8   1 154.293 4.94765   3
   4   8   1 156.752 5.31747   1
   4   8   1 156.518 4.75580   3
   4   8   1 158.833 4.98629   7
   4   8   1 145.687 4.86649   4
   4   8   1 151.423 4.42701   2
  -5  -8  -1 7.53886 1.62544   7
  -5  -8  -1 5.95738 1.45406   6
  -5  -8  -1 6.20657 0.91547   3
  -5  -8  -1 7.18081 1.52029   1
  -5  -8  -1 5.40267 0.87146   3
   5   8   1 5.97614 1.62190   1
   5   8   1 5.18331 1.01558   2
   5   8   1 4.45286 1.09299   3
   5   8   1 4.80324 1.30713   3
   5   8   1 5.02334 1.39740   7
   5   8   1 8.39777 1.45642   4
  -6  -8  -1 301.467 8.52267   6
  -6  -8  -1 299.185 7.20454   3
  -6  -8  -1 301.040 8.71638   1
  -6  -8  -1 299.467 7.21889   3
  -6  -8  -1 292.765 8.81795   7
   6   8   1 309.032 7.89017   2
   6   8   1 318.225 8.06739   3
   6   8   1 298.261 8.16408   3
   6   8   1 292.916 8.77535   1
  -7  -8  -1 115.569 4.75121   7
  -7  -8  -1 116.157 4.35716   6
   7   8   1 122.204 3.82614   3
   7   8   1 112.791 4.62024   1
   7   8   1 114.286 3.92281   3
   7   8   1 116.320 3.73678   2
  -8  -8  -1 145.161 5.53336   7
  -8  -8  -1 136.654 5.01711   6
   8   8   1 144.085 4.44273   3
   8   8   1 138.215 5.29135   1
   8   8   1 136.837 4.24446   3
   8   8   1 139.866 4.29435   2
  -9  -8  -1 15.3773 2.05766   6
  -9  -8  -1 12.1934 2.24204   7
   9   8   1 17.1197 1.52697   3
   9   8   1 14.3040 1.44965   2
   9   8   1 18.4974 2.28912   1
   9   8   1 16.5757 1.38007   3
 -10  -8  -1 136.455 5.67490   7
 -10  -8  -1 134.188 5.25870   6
  10   8   1 124.254 5.31860   1
  10   8   1 133.623 4.05060   3
  10   8   1 141.639 4.21662   3
 -11  -8  -1 64.6665 4.21109   7
 -11  -8  -1 65.0226 3.86924   6
  11   8   1 68.6956 2.64441   3
  11   8   1 66.4779 2.52421   3
  11   8   1 62.6721 3.91292   1
 -12  -8  -1 17.6196 2.46933   6
  12   8   1 13.8673 2.45367   1
  12   8   1 14.8271 1.29110   3
  12   8   1 14.2552 1.34672   3
  13   8   1 6.83305 1.09542   3
  13   8   1 5.88842 2.18391   1
  14   8   1 2.43896 2.00353   1
  15   8   1 39.7827 3.81607   1
  15   8   1 38.7787 3.10115   2
  16   8   1 8.22031 2.02547   2
  16   8   1 2.34415 2.51181   1
  17   8   1 4.99791 1.96265   4
  17   8   1 8.71100 2.22853   2
  17   8   1 8.92095 2.91704   1
  18   8   1 22.8596 3.52169   1
  18   8   1 19.9532 2.93088   4
  15  -9  -1 1.15961 2.16020   2
 -15   9   1 -3.5874 2.81683   5
  14  -9  -1 2.92639 1.71076   4
  14  -9  -1 3.94037 1.95262   3
  14  -9  -1 7.92531 2.54346   2
 -14   9   1 3.05818 2.76930   5
  13  -9  -1 3.86073 1.84080   3
  13  -9  -1 -0.3710 2.02593   2
  13  -9  -1 4.91492 1.71641   4
 -13   9   1 1.75094 2.32041   5
  12  -9  -1 40.5677 3.01409   4
  12  -9  -1 29.7396 2.96126   3
  12  -9  -1 26.9502 3.18539   2
 -12   9   1 30.0207 3.82667   5
  11  -9  -1 57.8995 3.33642   4
  11  -9  -1 45.4474 3.37127   3
  11  -9  -1 46.3182 3.88716   2
 -11   9   1 48.6480 4.62411   5
  10  -9  -1 42.0002 3.21231   3
  10  -9  -1 33.6373 3.22820   2
  10  -9  -1 30.4552 2.64776   4
 -10   9   1 27.2745 3.50081   5
   9  -9  -1 102.527 4.07383   4
   9  -9  -1 95.9326 4.72451   2
   9  -9  -1 91.9448 4.35398   3
  -9   9   1 94.5205 5.36675   5
   8  -9  -1 4.64148 1.79355   2
   8  -9  -1 2.89733 1.32106   4
   8  -9  -1 4.99444 1.71459   3
  -8   9   1 5.31807 2.20800   5
  -8   9   1 4.50641 1.03250   3
  -8   9   1 4.77124 0.97009   3
   7  -9  -1 303.320 8.67145   4
   7  -9  -1 297.124 9.19172   2
   7  -9  -1 299.626 8.95663   3
  -7   9   1 307.723 8.27256   3
  -7   9   1 292.925 9.74031   5
  -7   9   1 314.847 8.16148   3
   6  -9  -1 32.3593 2.62445   3
   6  -9  -1 36.4360 2.51016   2
   6  -9  -1 37.6296 2.48970   4
  -6   9   1 27.3411 2.96358   5
  -6   9   1 31.9877 2.34290   3
  -6   9   1 34.2833 2.15615   3
   5  -9  -1 34.3059 2.28582   4
   5  -9  -1 37.5179 2.71841   3
   5  -9  -1 32.7555 2.63414   2
  -5   9   1 36.9894 2.29993   3
  -5   9   1 32.1995 3.08596   5
  -5   9   1 32.3855 2.43033   3
   4  -9  -1 279.143 7.93861   4
   4  -9  -1 281.591 8.29609   3
   4  -9  -1 274.573 8.23647   2
  -4   9   1 278.789 8.21789   3
  -4   9   1 289.319 7.97909   3
  -4   9   1 292.606 7.97149   4
  -4   9   1 279.314 8.85581   1
   3  -9  -1 74.3726 3.17300   4
   3  -9  -1 73.2580 3.29068   2
   3  -9  -1 77.5480 3.42446   3
  -3   9   1 68.8148 3.00784   4
  -3   9   1 65.2217 3.78655   1
  -3   9   1 75.4918 3.54725   3
  -3   9   1 69.8027 3.09652   3
   2  -9  -1 149.896 4.90558   4
   2  -9  -1 153.941 5.21966   3
   2  -9  -1 143.254 4.90437   2
  -2   9   1 147.477 5.21877   3
  -2   9   1 149.113 4.83335   4
  -2   9   1 146.594 4.90436   3
  -2   9   1 150.286 5.64915   1
   1  -9  -1 83.6455 4.37086   1
   1  -9  -1 77.6205 3.06434   7
   1  -9  -1 78.4927 3.27680   4
   1  -9  -1 74.3545 3.17988   2
   1  -9  -1 81.4566 4.11227   3
   1  -9  -1 71.5070 3.47090   3
  -1   9   1 78.5182 3.30199   2
  -1   9   1 78.9359 3.32421   3
  -1   9   1 76.9929 3.61803   3
  -1   9   1 79.1100 3.73881   1
  -1   9   1 78.9214 3.20104   4
   0  -9  -1 388.248 10.0091   4
   0  -9  -1 352.126 9.93358   3
   0  -9  -1 368.231 10.3561   1
   0  -9  -1 363.085 9.71281   7
   0  -9  -1 369.045 9.71816   2
   0  -9  -1 377.385 10.1474   3
   0   9   1 362.237 10.4552   1
   0   9   1 368.483 9.79560   2
   0   9   1 368.097 10.2932   3
   0   9   1 373.678 9.83950   4
   0   9   1 362.427 9.90918   3
  -1  -9  -1 42.1774 2.30134   2
  -1  -9  -1 46.8912 2.97135   1
  -1  -9  -1 45.4330 2.60880   4
  -1  -9  -1 50.7503 2.61911   3
  -1  -9  -1 48.7814 2.83660   3
  -1  -9  -1 44.3728 2.46159   7
   1   9   1 40.5517 3.01254   1
   1   9   1 52.4271 2.41403   4
   1   9   1 47.2790 2.39139   2
   1   9   1 45.6096 2.53520   3
   1   9   1 46.5015 2.82784   3
  -2  -9  -1 24.6701 2.06692   7
  -2  -9  -1 19.9614 1.61677   2
  -2  -9  -1 19.7307 2.18743   1
  -2  -9  -1 19.5835 1.90123   3
  -2  -9  -1 19.4173 1.83058   3
   2   9   1 22.3614 1.94025   3
   2   9   1 18.2982 2.21704   1
   2   9   1 20.9460 1.90301   4
   2   9   1 23.0822 1.79820   2
   2   9   1 22.8195 2.21539   3
  -3  -9  -1 80.5631 3.75349   1
  -3  -9  -1 80.4739 3.34696   3
  -3  -9  -1 83.2916 3.05931   2
  -3  -9  -1 81.9077 3.24192   3
  -3  -9  -1 85.8836 3.62447   7
   3   9   1 81.1137 3.67803   3
   3   9   1 92.0058 3.15306   2
   3   9   1 90.2018 3.44516   7
   3   9   1 82.4924 3.69853   1
   3   9   1 85.8192 3.40918   3
   3   9   1 85.6325 3.47523   4
  -4  -9  -1 132.046 4.21331   3
  -4  -9  -1 130.848 5.37624   1
  -4  -9  -1 129.704 4.78881   7
  -4  -9  -1 126.433 4.55540   6
  -4  -9  -1 131.408 4.07762   2
  -4  -9  -1 124.462 4.08111   3
   4   9   1 127.333 4.03638   2
   4   9   1 126.636 4.95018   1
   4   9   1 119.109 4.60034   3
   4   9   1 132.854 4.57923   7
   4   9   1 129.142 4.42981   3
  -5  -9  -1 181.161 5.11377   3
  -5  -9  -1 179.487 5.86624   6
  -5  -9  -1 189.240 5.20918   3
  -5  -9  -1 184.965 6.19178   7
   5   9   1 188.982 5.36559   2
   5   9   1 183.672 5.83224   3
   5   9   1 177.268 6.21359   1
   5   9   1 188.337 5.66905   3
  -6  -9  -1 14.6212 1.05251   3
  -6  -9  -1 14.3952 1.08012   3
  -6  -9  -1 14.0017 1.85935   6
  -6  -9  -1 13.3058 2.10347   7
   6   9   1 14.3364 1.58437   3
   6   9   1 14.6548 1.42872   2
   6   9   1 12.4673 1.99713   1
   6   9   1 13.1980 1.72673   3
  -7  -9  -1 8.37977 1.73462   6
  -7  -9  -1 9.38399 1.92572   7
   7   9   1 7.52334 1.90911   1
   7   9   1 11.5959 1.59273   3
   7   9   1 8.76520 1.17316   2
   7   9   1 9.06596 1.30664   3
  -8  -9  -1 27.0610 2.77358   7
  -8  -9  -1 31.2502 2.63181   6
   8   9   1 32.7180 2.05160   3
   8   9   1 27.3893 2.73026   1
   8   9   1 28.2994 2.14616   3
   8   9   1 29.4417 1.87416   2
  -9  -9  -1 10.4935 2.16158   7
  -9  -9  -1 8.07143 1.76969   6
   9   9   1 9.87300 1.34239   3
   9   9   1 6.26258 1.88655   1
   9   9   1 10.6620 1.32687   2
   9   9   1 6.10860 1.30175   3
 -10  -9  -1 18.3047 2.75718   7
 -10  -9  -1 17.8662 2.30107   6
  10   9   1 19.0252 1.70957   2
  10   9   1 18.0196 1.67239   3
  10   9   1 23.2458 1.77943   3
  10   9   1 17.7983 2.52872   1
 -11  -9  -1 23.7653 3.09265   7
 -11  -9  -1 23.4461 2.62259   6
  11   9   1 20.5969 2.71346   1
  11   9   1 24.7376 1.92694   3
  11   9   1 24.8994 1.82891   3
 -12  -9  -1 72.8508 4.01750   6
  12   9   1 77.0926 4.49038   1
  12   9   1 66.4929 2.80451   3
  12   9   1 70.5719 2.99194   3
 -13  -9  -1 120.354 5.39531   6
  13   9   1 126.716 4.17159   3
  13   9   1 115.806 5.66406   1
  14   9   1 223.216 8.32601   1
  15   9   1 18.1499 3.06980   1
  15   9   1 19.1929 2.41333   2
  16   9   1 19.6971 3.16389   1
  16   9   1 15.0842 2.28058   2
  17   9   1 50.1902 4.74192   1
  14 -10  -1 2.23926 1.95114   3
  14 -10  -1 4.19555 2.62604   2
 -14  10   1 8.13933 3.01195   5
  13 -10  -1 16.1087 2.64687   3
  13 -10  -1 22.3017 2.61529   4
  13 -10  -1 16.2924 3.01104   2
 -13  10   1 15.2369 3.63216   5
  12 -10  -1 14.5363 2.78510   2
  12 -10  -1 16.9109 2.58270   3
  12 -10  -1 13.2746 2.17335   4
 -12  10   1 13.3177 3.10350   5
  11 -10  -1 0.99920 1.35418   4
  11 -10  -1 0.70308 1.82192   3
  11 -10  -1 1.69182 1.96218   2
 -11  10   1 4.44453 2.40741   5
  10 -10  -1 6.09664 1.63851   4
  10 -10  -1 5.02133 2.11713   2
  10 -10  -1 2.47643 1.77375   3
 -10  10   1 2.84470 2.28395   5
   9 -10  -1 1.68897 1.73461   3
   9 -10  -1 0.19312 1.42118   4
   9 -10  -1 0.51233 1.80502   2
  -9  10   1 0.86898 0.78225   3
  -9  10   1 0.26739 1.90885   5
   8 -10  -1 42.3596 3.08775   3
   8 -10  -1 43.0658 3.42365   2
   8 -10  -1 44.6990 3.00563   4
  -8  10   1 46.0585 3.98865   5
  -8  10   1 46.8304 2.42778   3
  -8  10   1 49.7124 2.35194   3
   7 -10  -1 59.1823 3.57410   3
   7 -10  -1 53.6541 3.57860   2
   7 -10  -1 63.8306 3.18604   4
  -7  10   1 55.5853 3.95891   5
  -7  10   1 58.0581 2.95684   3
  -7  10   1 63.9034 2.89706   3
   6 -10  -1 9.28745 1.93525   3
   6 -10  -1 10.6565 1.75236   4
   6 -10  -1 8.83194 1.88794   2
  -6  10   1 11.8236 2.35114   5
  -6  10   1 12.5087 1.79585   3
  -6  10   1 8.47484 1.51662   3
   5 -10  -1 82.2994 4.05322   3
   5 -10  -1 82.9786 3.96651   2
   5 -10  -1 89.1033 3.68831   4
  -5  10   1 91.8503 3.66918   3
  -5  10   1 85.4914 3.87219   3
   4 -10  -1 2.28768 1.19703   4
   4 -10  -1 2.39692 1.43093   3
   4 -10  -1 5.49324 1.52411   2
  -4  10   1 5.04520 1.60965   1
  -4  10   1 4.48191 1.62007   3
   3 -10  -1 11.4599 1.81522   3
   3 -10  -1 10.1790 1.69167   2
   3 -10  -1 11.9850 1.64162   4
  -3  10   1 11.4292 2.01791   3
  -3  10   1 8.23409 2.09109   1
   2 -10  -1 -0.1064 1.09045   2
   2 -10  -1 -0.8751 1.19373   3
   2 -10  -1 -0.9039 0.99525   7
   2 -10  -1 -1.0279 1.00689   4
  -2  10   1 0.15740 1.62054   1
  -2  10   1 -0.6452 1.28009   3
   1 -10  -1 29.6872 2.26612   4
   1 -10  -1 31.4695 2.46204   3
   1 -10  -1 29.7013 1.97266   7
   1 -10  -1 32.1356 2.23849   2
  -1  10   1 23.7632 2.65192   1
  -1  10   1 33.6986 2.81028   3
   0 -10  -1 10.3412 1.46664   7
   0 -10  -1 7.01464 1.32999   2
   0 -10  -1 8.86009 1.63124   3
   0 -10  -1 11.0037 1.63165   4
   0  10   1 7.24995 1.89054   1
   0  10   1 8.74140 1.65111   2
   0  10   1 5.75071 1.77326   3
  -1 -10  -1 1.06816 0.99679   2
  -1 -10  -1 0.27442 1.17549   4
  -1 -10  -1 -1.0886 1.09497   3
  -1 -10  -1 0.86237 1.11508   7
   1  10   1 0.39926 1.26183   1
   1  10   1 0.72261 1.06733   2
   1  10   1 0.24432 1.37384   3
  -2 -10  -1 8.13702 1.57441   3
  -2 -10  -1 9.14025 1.47772   3
  -2 -10  -1 9.10129 1.30772   2
  -2 -10  -1 9.99457 1.62571   7
   2  10   1 10.2907 1.80811   1
   2  10   1 7.51996 1.30870   2
   2  10   1 10.7782 1.90935   3
  -3 -10  -1 12.0104 1.38699   2
  -3 -10  -1 11.1774 1.62936   3
  -3 -10  -1 14.3308 2.01087   7
  -3 -10  -1 10.5507 1.48107   3
   3  10   1 13.6311 1.93251   3
   3  10   1 12.0123 2.11290   1
   3  10   1 13.5225 1.52887   2
  -4 -10  -1 114.916 3.84289   2
  -4 -10  -1 105.622 4.21683   6
  -4 -10  -1 106.545 3.94016   3
  -4 -10  -1 113.529 3.85879   3
  -4 -10  -1 113.682 4.63591   7
   4  10   1 116.113 3.81412   2
   4  10   1 109.951 4.35500   3
   4  10   1 103.931 4.45824   1
  -5 -10  -1 63.6282 2.75776   2
  -5 -10  -1 59.9544 2.56738   3
  -5 -10  -1 57.3167 3.15623   6
  -5 -10  -1 68.8943 2.71991   3
  -5 -10  -1 65.9272 3.49424   7
   5  10   1 62.6123 3.69625   1
   5  10   1 64.5852 2.64691   2
   5  10   1 63.1569 3.32242   3
  -6 -10  -1 1.93451 0.83143   3
  -6 -10  -1 0.58239 1.44634   7
  -6 -10  -1 1.59688 1.35310   6
  -6 -10  -1 1.06278 0.77214   3
   6  10   1 0.24784 1.23115   3
   6  10   1 2.25070 1.34015   1
   6  10   1 1.37224 0.99424   2
  -7 -10  -1 180.033 6.15545   6
  -7 -10  -1 179.493 4.60778   3
  -7 -10  -1 184.028 6.60332   7
  -7 -10  -1 188.370 4.63510   3
   7  10   1 184.951 6.61334   1
   7  10   1 184.849 5.45319   2
   7  10   1 181.598 5.94232   3
  -8 -10  -1 20.6798 2.58306   7
  -8 -10  -1 15.3458 2.08418   6
   8  10   1 17.1972 1.58810   2
   8  10   1 15.6527 2.43437   1
   8  10   1 12.2588 1.76082   3
  -9 -10  -1 29.4162 3.07417   7
  -9 -10  -1 22.2121 2.47114   6
   9  10   1 25.1788 1.89293   2
   9  10   1 28.8522 2.95763   1
   9  10   1 31.8992 2.38582   3
 -10 -10  -1 120.244 5.66163   7
 -10 -10  -1 121.776 5.09691   6
  10  10   1 126.522 4.55953   3
  10  10   1 135.603 5.69806   1
 -11 -10  -1 53.4836 4.08279   7
 -11 -10  -1 49.7018 3.45939   6
  11  10   1 57.8121 2.97872   3
  11  10   1 50.2632 3.95513   1
 -12 -10  -1 28.7803 3.03698   6
 -12 -10  -1 31.6003 3.43706   7
  12  10   1 24.1630 2.14148   3
  12  10   1 27.6601 3.22787   1
 -13 -10  -1 -0.4278 1.72912   6
  13  10   1 -0.6279 1.89229   1
  13  10   1 -0.7270 1.21809   3
 -14 -10  -1 1.99545 1.93285   6
  14  10   1 3.28990 2.25701   1
  15  10   1 2.28919 2.26142   1
  16  10   1 12.9138 2.96422   1
  17  10   1 4.13291 2.93262   1
  14 -11  -1 10.1803 2.80556   2
  14 -11  -1 16.2296 2.77383   3
 -14  11   1 10.6930 3.38948   5
  13 -11  -1 1.79504 1.98806   3
  13 -11  -1 1.90299 1.77368   4
  13 -11  -1 3.08891 2.31834   2
 -13  11   1 -1.7787 2.32242   5
  12 -11  -1 2.74983 2.04969   3
  12 -11  -1 1.20377 1.68458   4
  12 -11  -1 -0.8051 1.97554   2
 -12  11   1 2.61127 2.50940   5
  11 -11  -1 81.3433 5.00162   2
  11 -11  -1 85.7674 4.30525   4
  11 -11  -1 88.3999 4.73803   3
 -11  11   1 83.6126 5.52170   5
  10 -11  -1 28.8955 3.26298   2
  10 -11  -1 29.4004 2.76414   4
  10 -11  -1 22.4597 2.89282   3
 -10  11   1 24.1393 3.44274   5
   9 -11  -1 5.48864 1.61053   4
   9 -11  -1 6.81664 2.10431   3
   9 -11  -1 8.07856 2.24087   2
  -9  11   1 6.65474 2.44998   5
  -9  11   1 4.83024 1.10408   3
   8 -11  -1 -0.5274 1.44089   4
   8 -11  -1 1.22855 1.76475   3
   8 -11  -1 0.62941 1.71405   2
  -8  11   1 2.35717 2.01640   5
  -8  11   1 0.44774 1.17587   3
   7 -11  -1 4.79951 1.52642   4
   7 -11  -1 5.39798 1.97573   3
   7 -11  -1 7.62485 1.77338   2
  -7  11   1 8.70885 1.57754   3
  -7  11   1 5.17046 1.56089   3
  -7  11   1 7.31771 2.26764   5
   6 -11  -1 5.79046 1.72726   4
   6 -11  -1 8.05938 1.90019   3
   6 -11  -1 9.00829 1.99073   2
  -6  11   1 7.33862 1.71302   3
  -6  11   1 6.10499 2.11292   5
   5 -11  -1 5.91466 1.66383   4
   5 -11  -1 3.22822 1.29893   2
   5 -11  -1 6.84419 1.80355   3
  -5  11   1 1.07881 1.53612   3
   4 -11  -1 46.8846 2.86093   4
   4 -11  -1 52.0321 3.13123   2
   4 -11  -1 45.1956 3.11999   3
  -4  11   1 47.0968 3.25418   3
  -4  11   1 51.0950 3.76929   1
   3 -11  -1 147.559 5.46514   3
   3 -11  -1 150.634 5.33838   2
   3 -11  -1 140.424 5.14572   4
  -3  11   1 148.732 6.06233   1
  -3  11   1 148.928 5.63257   3
   2 -11  -1 317.814 9.19016   4
   2 -11  -1 319.319 9.16576   2
   2 -11  -1 321.078 8.85316   7
   2 -11  -1 317.470 9.37505   3
  -2  11   1 331.837 9.66905   3
  -2  11   1 323.477 10.0786   1
   1 -11  -1 2.75633 1.39928   4
   1 -11  -1 0.32304 1.34082   3
   1 -11  -1 0.87499 1.06970   7
   1 -11  -1 2.78999 1.27512   2
  -1  11   1 2.64662 1.47047   1
  -1  11   1 1.70272 1.56627   3
   0 -11  -1 35.9445 2.63187   4
   0 -11  -1 40.0772 2.46312   2
   0 -11  -1 37.2365 2.53229   7
   0 -11  -1 39.2757 2.68427   3
   0  11   1 40.1767 3.32578   1
   0  11   1 41.3121 3.16583   3
  -1 -11  -1 14.3680 1.95767   7
  -1 -11  -1 13.1673 1.90712   4
  -1 -11  -1 13.9023 1.65757   2
  -1 -11  -1 13.1832 1.91263   3
   1  11   1 15.0690 2.29159   1
   1  11   1 17.2961 2.30606   3
  -2 -11  -1 73.9407 3.66966   7
  -2 -11  -1 78.7640 3.20102   2
  -2 -11  -1 77.0016 3.51550   3
   2  11   1 76.9119 3.99072   3
   2  11   1 75.4831 4.13366   1
  -3 -11  -1 69.0174 3.36922   3
  -3 -11  -1 70.9471 3.25233   3
  -3 -11  -1 69.1980 3.49258   7
  -3 -11  -1 72.4947 3.00390   2
   3  11   1 69.4532 3.78361   3
   3  11   1 73.2276 4.06817   1
   3  11   1 72.8441 3.05501   2
  -4 -11  -1 9.53195 1.43348   3
  -4 -11  -1 10.4477 1.91479   7
  -4 -11  -1 11.1618 1.40568   2
  -4 -11  -1 11.8534 1.63732   3
  -4 -11  -1 6.86652 1.67262   6
   4  11   1 11.7125 1.88410   3
   4  11   1 6.25266 1.97410   1
   4  11   1 11.1893 1.39675   2
  -5 -11  -1 230.188 6.64236   3
  -5 -11  -1 231.275 7.62495   7
  -5 -11  -1 234.789 7.39540   6
  -5 -11  -1 227.679 6.69429   2
  -5 -11  -1 243.143 6.78546   3
   5  11   1 237.506 7.74836   1
   5  11   1 235.081 7.42486   3
   5  11   1 248.529 6.82922   2
  -6 -11  -1 3.35910 1.00478   3
  -6 -11  -1 4.68414 1.60585   6
  -6 -11  -1 4.09481 0.99261   3
  -6 -11  -1 3.76878 1.70201   7
   6  11   1 1.04027 1.77024   1
   6  11   1 4.38196 1.49860   3
   6  11   1 3.69069 1.03495   2
  -7 -11  -1 206.286 5.33664   3
  -7 -11  -1 205.562 5.32134   3
  -7 -11  -1 192.191 6.67270   6
  -7 -11  -1 199.214 7.09813   7
   7  11   1 210.326 6.66735   3
   7  11   1 196.400 5.94117   2
   7  11   1 197.915 7.17045   1
  -8 -11  -1 4.75287 1.99155   7
  -8 -11  -1 7.36595 1.89482   6
   8  11   1 8.73715 1.27827   2
   8  11   1 7.13534 2.16168   1
   8  11   1 8.51406 1.77170   3
  -9 -11  -1 36.4957 3.25098   6
  -9 -11  -1 29.5559 3.18624   7
   9  11   1 30.6999 2.55593   3
   9  11   1 32.7407 3.28604   1
 -10 -11  -1 2.31787 1.76513   6
 -10 -11  -1 1.79151 2.04725   7
  10  11   1 3.48083 1.53618   3
  10  11   1 0.51668 2.05284   1
 -11 -11  -1 76.4475 4.17819   6
 -11 -11  -1 76.5132 4.78463   7
  11  11   1 75.5133 3.64861   3
  11  11   1 77.3655 4.71171   1
 -12 -11  -1 90.0086 4.67028   6
 -12 -11  -1 101.060 5.54073   7
  12  11   1 94.7801 5.24996   1
  12  11   1 91.8722 4.04292   3
 -13 -11  -1 5.84799 2.11475   6
 -13 -11  -1 3.49134 2.41999   7
  13  11   1 10.7738 2.68032   1
  13  11   1 5.71473 1.66201   3
 -14 -11  -1 0.93730 1.77616   6
  14  11   1 -1.6006 2.44020   1
  15  11   1 3.35224 2.78729   1
  16  11   1 -1.1326 2.36447   1
  17  11   1 -2.3776 2.28142   1
  13 -12  -1 9.54203 2.48624   3
  13 -12  -1 10.1046 2.82471   2
  13 -12  -1 5.04498 2.07613   4
 -13  12   1 10.7951 3.14778   5
  12 -12  -1 2.33266 2.13596   3
  12 -12  -1 0.32113 2.13067   2
  12 -12  -1 0.43256 1.70391   4
 -12  12   1 4.34276 3.01227   5
  11 -12  -1 3.56532 2.13819   3
  11 -12  -1 0.60336 1.62146   2
  11 -12  -1 2.58191 1.83742   4
 -11  12   1 0.61991 2.60682   5
  10 -12  -1 0.68322 1.98799   3
  10 -12  -1 5.20196 2.19407   2
  10 -12  -1 1.03327 1.71578   4
 -10  12   1 2.79014 2.35026   5
   9 -12  -1 3.50410 2.11308   2
   9 -12  -1 6.36320 1.77151   4
   9 -12  -1 9.34083 2.23700   3
  -9  12   1 7.45208 1.46607   3
  -9  12   1 3.28266 2.63982   5
   8 -12  -1 67.6257 4.23947   2
   8 -12  -1 73.1866 4.42453   3
   8 -12  -1 67.2741 3.86123   4
  -8  12   1 63.4036 4.98148   5
  -8  12   1 79.2851 3.57631   3
   7 -12  -1 -0.3515 1.60734   4
   7 -12  -1 0.08962 1.80130   3
   7 -12  -1 0.62057 1.72968   2
  -7  12   1 -1.3354 1.40663   3
  -7  12   1 4.83474 2.16103   5
   6 -12  -1 -0.2473 1.59082   2
   6 -12  -1 -2.4515 1.68822   3
   6 -12  -1 -0.8390 1.33947   4
  -6  12   1 0.53512 1.60019   3
  -6  12   1 0.47650 1.87902   5
   5 -12  -1 143.851 5.41808   4
   5 -12  -1 147.770 5.74347   2
   5 -12  -1 154.663 5.91449   3
  -5  12   1 143.696 5.74255   3
   4 -12  -1 20.4063 2.33178   2
   4 -12  -1 26.3961 2.48912   4
   4 -12  -1 22.5714 2.60130   3
  -4  12   1 20.6103 2.93708   1
  -4  12   1 22.5912 2.59645   3
   3 -12  -1 12.6976 2.20472   3
   3 -12  -1 14.9407 1.83177   7
   3 -12  -1 16.0315 2.08060   4
   3 -12  -1 15.1459 2.02636   2
  -3  12   1 18.1897 2.43933   3
  -3  12   1 12.2408 2.49377   1
   2 -12  -1 -1.4024 1.34098   3
   2 -12  -1 0.93044 1.21249   7
   2 -12  -1 0.74788 1.36875   4
   2 -12  -1 1.69101 1.36083   2
  -2  12   1 1.43229 1.89782   1
  -2  12   1 -1.2114 1.62927   3
   1 -12  -1 0.09441 1.36144   3
   1 -12  -1 -1.3579 1.24876   4
   1 -12  -1 1.69045 1.22647   2
   1 -12  -1 1.44388 1.30037   7
  -1  12   1 2.13942 1.90718   1
  -1  12   1 1.79629 1.60115   3
   0 -12  -1 2.71581 1.48154   3
   0 -12  -1 1.09530 1.23644   7
   0 -12  -1 0.88916 1.38642   4
   0 -12  -1 1.09222 1.17579   2
   0  12   1 1.01395 1.91037   1
   0  12   1 1.89512 1.66601   3
  -1 -12  -1 19.4545 2.24581   7
  -1 -12  -1 19.0063 1.98810   2
  -1 -12  -1 23.8685 2.37109   3
   1  12   1 19.3176 2.46578   3
   1  12   1 18.9463 2.70568   1
  -2 -12  -1 4.61454 1.27030   2
  -2 -12  -1 8.25607 1.74752   7
  -2 -12  -1 4.23442 1.51394   3
   2  12   1 5.94132 2.10904   1
   2  12   1 9.09789 2.09937   3
  -3 -12  -1 13.4117 2.16915   7
  -3 -12  -1 10.1015 1.68088   3
  -3 -12  -1 12.1126 1.66681   2
   3  12   1 13.2969 2.16728   3
   3  12   1 12.8526 2.20772   1
  -4 -12  -1 235.580 7.63414   6
  -4 -12  -1 242.764 7.11441   2
  -4 -12  -1 247.879 7.89550   7
  -4 -12  -1 241.320 7.19598   3
   4  12   1 250.908 8.36612   1
   4  12   1 250.232 7.96658   3
  -5 -12  -1 1.97336 1.51802   6
  -5 -12  -1 2.91405 1.18165   3
  -5 -12  -1 -1.3987 1.10491   3
  -5 -12  -1 1.06513 1.61570   7
  -5 -12  -1 0.82265 0.99861   2
   5  12   1 0.31558 1.77094   1
   5  12   1 0.37736 1.53657   3
  -6 -12  -1 6.04318 1.24491   3
  -6 -12  -1 7.30538 2.04793   6
  -6 -12  -1 4.55888 1.86044   7
  -6 -12  -1 6.69100 1.18431   3
   6  12   1 8.02386 2.17104   1
   6  12   1 7.14265 1.85923   3
  -7 -12  -1 3.92589 0.94658   3
  -7 -12  -1 6.03889 1.96380   7
  -7 -12  -1 6.79589 1.84405   6
  -7 -12  -1 3.76266 0.95948   3
   7  12   1 3.85538 1.73417   3
   7  12   1 4.00540 2.09751   1
  -8 -12  -1 5.32787 0.56724   3
  -8 -12  -1 5.48605 2.00238   6
  -8 -12  -1 6.51874 2.19123   7
   8  12   1 2.64642 2.14124   1
   8  12   1 1.71932 1.67367   3
  -9 -12  -1 50.5598 3.45464   6
  -9 -12  -1 46.5099 4.02858   7
   9  12   1 42.9205 3.16249   3
   9  12   1 48.1813 4.05544   1
 -10 -12  -1 38.7479 3.41741   6
 -10 -12  -1 52.3101 3.80092   7
  10  12   1 46.3601 3.23552   3
  10  12   1 38.2646 3.76451   1
 -11 -12  -1 -0.5969 1.61362   6
 -11 -12  -1 0.88774 2.18524   7
  11  12   1 1.82763 2.23117   1
  11  12   1 1.80329 1.61740   3
 -12 -12  -1 6.64027 2.12927   6
 -12 -12  -1 8.15128 2.63387   7
  12  12   1 5.01053 2.48267   1
  12  12   1 3.79099 1.71421   3
 -13 -12  -1 48.3504 4.61145   7
 -13 -12  -1 48.6440 4.12817   6
  13  12   1 42.4824 3.21625   3
  13  12   1 35.0704 3.92547   1
 -14 -12  -1 1.31791 1.96214   6
  14  12   1 -0.8431 2.64111   1
 -15 -12  -1 9.86999 2.55090   6
  15  12   1 4.57772 2.96942   1
  16  12   1 -1.1436 2.43549   1
  12 -13  -1 9.58109 2.73632   2
  12 -13  -1 4.34082 2.13066   4
  12 -13  -1 6.63944 2.46540   3
 -12  13   1 -0.4470 2.49595   5
  11 -13  -1 13.4626 2.45223   4
  11 -13  -1 16.3388 2.96593   2
  11 -13  -1 11.3519 2.65681   3
 -11  13   1 20.0046 3.56197   5
  10 -13  -1 35.0669 3.67839   3
  10 -13  -1 32.9478 3.55573   2
  10 -13  -1 34.9420 3.20311   4
 -10  13   1 34.4080 4.29795   5
   9 -13  -1 0.48389 1.95679   3
   9 -13  -1 -0.2533 1.73420   4
   9 -13  -1 -1.7827 1.74816   2
  -9  13   1 0.13216 2.15169   5
   8 -13  -1 -0.5369 1.76497   3
   8 -13  -1 1.26294 1.85530   2
   8 -13  -1 -1.2112 1.40951   4
  -8  13   1 1.82930 2.20772   5
  -8  13   1 -0.4803 1.33455   3
   7 -13  -1 -1.7301 1.64640   3
   7 -13  -1 -1.0542 1.66308   2
   7 -13  -1 1.69819 1.58691   4
  -7  13   1 -0.2732 1.56798   3
  -7  13   1 -0.3549 2.11481   5
   6 -13  -1 1.44310 1.53275   4
   6 -13  -1 5.84153 1.99370   2
   6 -13  -1 0.03403 1.93181   3
  -6  13   1 0.03057 1.63235   3
  -6  13   1 -1.9025 1.93980   5
   5 -13  -1 19.9015 2.66201   3
   5 -13  -1 20.4062 2.59786   2
   5 -13  -1 24.0243 2.56815   4
  -5  13   1 18.1048 3.01841   1
  -5  13   1 20.1909 2.65442   3
   4 -13  -1 71.0790 4.12881   3
   4 -13  -1 73.5071 3.96641   2
   4 -13  -1 76.9691 3.48560   7
   4 -13  -1 72.6392 3.99943   4
  -4  13   1 71.6845 4.26763   3
  -4  13   1 71.5215 4.74678   1
   3 -13  -1 0.59954 1.64644   4
   3 -13  -1 2.68573 1.83049   3
   3 -13  -1 0.40108 1.25543   7
   3 -13  -1 -0.8733 1.39239   2
  -3  13   1 1.08843 2.08887   1
  -3  13   1 -1.2764 1.73243   3
   2 -13  -1 3.35250 1.43149   7
   2 -13  -1 2.07205 1.55789   4
   2 -13  -1 4.14284 1.88375   3
   2 -13  -1 7.00929 1.69589   2
  -2  13   1 3.19089 2.12436   1
  -2  13   1 4.06116 1.91477   3
   1 -13  -1 40.8967 2.81769   2
   1 -13  -1 38.8117 3.10385   3
   1 -13  -1 36.7363 3.01010   4
   1 -13  -1 39.9800 2.75277   7
  -1  13   1 45.6033 3.95163   1
  -1  13   1 40.6961 3.46094   3
   0 -13  -1 4.36525 1.75453   3
   0 -13  -1 1.69790 1.31950   2
   0 -13  -1 1.30082 1.22330   4
   0 -13  -1 1.16107 1.54074   7
   0  13   1 1.22526 1.75305   3
   0  13   1 1.18354 1.95828   1
  -1 -13  -1 6.21976 1.62801   7
  -1 -13  -1 8.65810 1.76693   3
  -1 -13  -1 6.77682 1.51852   2
   1  13   1 5.51272 2.11507   1
   1  13   1 9.31854 2.16005   3
  -2 -13  -1 28.6297 2.59161   3
  -2 -13  -1 29.8526 2.76068   7
  -2 -13  -1 30.0131 2.34888   2
   2  13   1 31.9082 3.31203   1
   2  13   1 33.9419 3.20253   3
  -3 -13  -1 54.2763 3.45457   7
  -3 -13  -1 57.9922 3.08001   2
  -3 -13  -1 55.9352 3.21039   3
   3  13   1 56.3264 4.08060   1
   3  13   1 55.6675 3.86790   3
  -4 -13  -1 2.80144 1.21579   2
  -4 -13  -1 1.88455 1.36744   3
  -4 -13  -1 1.62220 1.64708   7
  -4 -13  -1 4.44746 1.73351   6
   4  13   1 5.42912 2.00342   3
   4  13   1 2.80607 2.14277   1
  -5 -13  -1 17.7892 1.89543   3
  -5 -13  -1 20.3859 2.62949   7
  -5 -13  -1 21.8847 2.57478   6
  -5 -13  -1 22.6307 2.00365   2
   5  13   1 20.0269 2.88243   1
   5  13   1 13.4512 2.29329   3
  -6 -13  -1 22.5650 2.84815   7
  -6 -13  -1 21.4737 2.59647   6
  -6 -13  -1 22.9986 1.96305   3
  -6 -13  -1 18.3904 1.78406   3
   6  13   1 22.5344 2.64059   3
   6  13   1 21.8979 2.96906   1
  -7 -13  -1 77.5838 4.16751   6
  -7 -13  -1 78.9792 3.00977   3
  -7 -13  -1 78.1650 3.04848   3
  -7 -13  -1 81.4146 4.59286   7
   7  13   1 87.5752 4.97346   1
   7  13   1 87.4200 4.40888   3
  -8 -13  -1 11.9712 1.64322   3
  -8 -13  -1 14.1899 2.55419   6
  -8 -13  -1 12.9126 1.05187   3
  -8 -13  -1 11.4164 2.48842   7
   8  13   1 12.5365 2.78846   1
   8  13   1 13.3725 2.36912   3
  -9 -13  -1 37.1780 3.77861   7
  -9 -13  -1 36.4397 3.46658   6
   9  13   1 30.0664 3.52850   1
   9  13   1 32.9022 3.08464   3
 -10 -13  -1 22.3999 2.83961   6
 -10 -13  -1 29.0849 3.29593   7
  10  13   1 20.2200 2.58671   3
  10  13   1 20.8241 3.18650   1
 -11 -13  -1 2.66253 1.91946   6
 -11 -13  -1 -1.1377 2.11039   7
  11  13   1 1.01204 1.78302   3
  11  13   1 1.19799 2.28215   1
 -12 -13  -1 9.03211 2.54831   6
 -12 -13  -1 4.90381 2.65432   7
  12  13   1 10.0792 2.82959   1
  12  13   1 8.68370 2.10715   3
 -13 -13  -1 4.37397 2.68029   7
 -13 -13  -1 4.95973 2.15491   6
  13  13   1 6.12358 2.78788   1
  13  13   1 2.60906 1.86608   3
 -14 -13  -1 5.73827 2.69274   7
 -14 -13  -1 1.75605 1.95229   6
  14  13   1 2.33456 2.55326   1
 -15 -13  -1 17.7012 3.03945   6
  15  13   1 17.5464 3.49783   1
  16  13   1 6.22098 2.94515   1
  11 -14  -1 2.63464 2.28325   2
  11 -14  -1 6.64232 2.42839   3
  11 -14  -1 2.90250 1.82268   4
 -11  14   1 0.38114 2.46146   5
  10 -14  -1 2.20551 1.72546   4
  10 -14  -1 -1.0201 2.02472   3
  10 -14  -1 2.46433 2.22827   2
 -10  14   1 -0.2402 2.61916   5
   9 -14  -1 4.20176 2.32516   3
   9 -14  -1 2.89518 2.16109   2
   9 -14  -1 2.89796 1.73160   4
  -9  14   1 1.82765 2.29576   5
   8 -14  -1 45.8007 3.69746   4
   8 -14  -1 48.3324 4.02579   3
   8 -14  -1 42.6518 3.87700   2
  -8  14   1 48.1832 3.27661   3
  -8  14   1 42.9371 4.41548   5
   7 -14  -1 5.81030 1.93359   4
   7 -14  -1 3.39716 1.96429   2
   7 -14  -1 6.68478 2.32193   3
  -7  14   1 5.35344 2.38891   5
  -7  14   1 5.09874 1.91740   3
   6 -14  -1 2.21983 1.66055   4
   6 -14  -1 1.93130 2.15964   3
   6 -14  -1 1.67875 1.89047   2
  -6  14   1 5.24058 2.51289   5
  -6  14   1 4.63035 1.92794   3
   5 -14  -1 -2.2118 1.65558   4
   5 -14  -1 0.85438 1.49812   7
   5 -14  -1 3.37095 2.05442   3
   5 -14  -1 -0.2246 1.64891   2
  -5  14   1 -0.4991 1.78010   3
  -5  14   1 -1.6315 2.04028   1
   4 -14  -1 0.67799 1.61629   4
   4 -14  -1 2.21734 1.96792   3
   4 -14  -1 1.80105 1.70904   2
   4 -14  -1 1.05730 1.36876   7
  -4  14   1 1.81346 2.23800   1
  -4  14   1 4.00598 2.14870   3
   3 -14  -1 19.3420 2.24796   7
   3 -14  -1 18.4794 2.70660   3
   3 -14  -1 20.0499 2.48634   2
   3 -14  -1 13.5010 2.26395   4
  -3  14   1 16.6607 2.65925   3
  -3  14   1 21.8844 2.92604   1
   2 -14  -1 0.04828 1.47488   7
   2 -14  -1 -1.1232 1.44069   2
   2 -14  -1 1.37739 1.65091   4
   2 -14  -1 0.00172 1.80558   3
  -2  14   1 -1.2282 1.79441   3
  -2  14   1 4.28928 2.29613   1
   1 -14  -1 1.79280 1.51005   2
   1 -14  -1 3.89756 1.79465   4
   1 -14  -1 4.60416 2.01182   3
   1 -14  -1 3.94657 1.74897   7
  -1  14   1 4.41489 2.36995   1
  -1  14   1 5.57855 2.15666   3
   0 -14  -1 11.4387 2.12976   4
   0 -14  -1 6.80496 1.97104   3
   0 -14  -1 7.93318 1.78159   2
   0 -14  -1 10.3204 1.95718   7
   0  14   1 7.37411 2.31601   3
   0  14   1 5.78620 2.39331   1
  -1 -14  -1 -0.8996 1.26964   2
  -1 -14  -1 1.05809 1.57281   3
  -1 -14  -1 0.22461 1.51270   7
   1  14   1 0.64063 1.94917   3
   1  14   1 2.97414 2.06074   1
  -2 -14  -1 96.5755 4.20605   2
  -2 -14  -1 96.1382 4.47160   3
  -2 -14  -1 101.042 4.58215   7
   2  14   1 95.5889 5.30996   1
   2  14   1 97.5643 5.17218   3
  -3 -14  -1 3.93683 2.00617   7
  -3 -14  -1 2.63375 1.31750   2
  -3 -14  -1 2.89103 1.53576   3
   3  14   1 1.23658 2.11423   1
   3  14   1 1.43024 1.90408   3
  -4 -14  -1 2.29806 1.46879   3
  -4 -14  -1 2.07322 1.84625   7
  -4 -14  -1 2.75785 1.28283   2
  -4 -14  -1 6.03871 1.89691   6
   4  14   1 3.44468 1.97775   3
   4  14   1 1.80581 2.16771   1
  -5 -14  -1 34.7367 3.23345   6
  -5 -14  -1 45.8250 3.67192   7
  -5 -14  -1 33.3111 2.58612   3
  -5 -14  -1 37.0871 2.49331   2
   5  14   1 32.8168 3.63027   1
   5  14   1 38.9141 3.48335   3
  -6 -14  -1 74.7006 4.49468   7
  -6 -14  -1 76.9114 4.24474   6
  -6 -14  -1 77.3134 3.40664   3
  -6 -14  -1 69.1548 4.15389   3
   6  14   1 74.6500 4.33906   3
   6  14   1 92.1378 5.17619   1
  -7 -14  -1 13.2418 1.54956   3
  -7 -14  -1 11.2713 1.80317   3
  -7 -14  -1 15.0774 2.46580   6
  -7 -14  -1 12.4716 2.57302   7
   7  14   1 15.7835 2.61553   3
   7  14   1 15.3937 2.93088   1
  -8 -14  -1 36.7894 3.42623   6
  -8 -14  -1 38.3345 1.87225   3
  -8 -14  -1 34.8765 3.63841   7
   8  14   1 41.0115 3.52546   3
   8  14   1 38.2013 3.97387   1
  -9 -14  -1 3.18465 1.91560   6
  -9 -14  -1 0.99555 2.09424   7
   9  14   1 -2.7422 1.80089   3
   9  14   1 -0.7310 2.20012   1
 -10 -14  -1 13.1703 2.87226   7
 -10 -14  -1 12.5590 2.45450   6
  10  14   1 10.9539 2.91143   1
  10  14   1 14.8859 2.62610   3
 -11 -14  -1 48.8101 4.03862   6
 -11 -14  -1 47.9421 4.52983   7
  11  14   1 45.5456 4.45407   1
  11  14   1 46.4861 3.69654   3
 -12 -14  -1 2.07483 2.50627   7
 -12 -14  -1 1.86563 1.93484   6
  12  14   1 -2.3919 2.29100   1
  12  14   1 1.61647 1.86695   3
 -13 -14  -1 5.58228 2.68830   7
 -13 -14  -1 5.78739 2.54630   6
  13  14   1 1.89270 2.56203   1
  13  14   1 3.68452 2.08912   3
 -14 -14  -1 -3.8347 2.08924   7
 -14 -14  -1 2.65324 2.30168   6
  14  14   1 -0.5663 2.62584   1
 -15 -14  -1 2.22452 2.38822   6
  15  14   1 -1.7414 2.57360   1
  10 -15  -1 17.0559 2.75291   4
  10 -15  -1 14.6116 2.94516   3
  10 -15  -1 14.5676 2.96191   2
 -10  15   1 14.1581 3.55111   5
   9 -15  -1 8.58915 2.46283   2
   9 -15  -1 11.2262 2.42735   4
   9 -15  -1 13.3722 2.99704   3
  -9  15   1 8.23015 2.88911   5
   8 -15  -1 -1.2989 1.80311   4
   8 -15  -1 1.29088 2.27457   3
   8 -15  -1 -4.2652 1.72736   2
  -8  15   1 0.43842 2.58820   5
  -8  15   1 -1.3225 1.55975   3
   7 -15  -1 16.6649 2.82841   2
   7 -15  -1 20.0995 3.18886   3
   7 -15  -1 21.2372 2.74953   4
  -7  15   1 17.6829 2.63529   3
  -7  15   1 20.7184 3.46742   5
   6 -15  -1 0.53603 2.09296   3
   6 -15  -1 1.52395 1.78051   4
   6 -15  -1 -0.8071 1.73505   2
   6 -15  -1 -0.5658 1.47010   7
  -6  15   1 -0.8787 2.15434   5
  -6  15   1 0.69872 1.85219   3
   5 -15  -1 9.71727 2.33573   2
   5 -15  -1 10.8981 2.24008   4
   5 -15  -1 14.5171 2.80539   3
   5 -15  -1 7.85038 1.75335   7
  -5  15   1 12.0597 2.98287   1
  -5  15   1 11.1571 2.50674   3
   4 -15  -1 38.4724 3.67606   3
   4 -15  -1 34.2808 2.83375   7
   4 -15  -1 38.8884 3.40489   2
   4 -15  -1 31.6311 3.27643   4
  -4  15   1 37.7002 4.10015   1
  -4  15   1 35.0248 3.43199   3
   3 -15  -1 51.7224 3.29472   7
   3 -15  -1 49.2377 3.61076   2
   3 -15  -1 48.5874 3.61885   4
   3 -15  -1 62.2172 4.28928   3
  -3  15   1 61.8487 4.77729   1
  -3  15   1 53.7920 4.25252   3
   2 -15  -1 0.09689 1.51669   2
   2 -15  -1 0.18146 1.74419   4
   2 -15  -1 2.52649 1.60718   7
   2 -15  -1 -0.6290 1.79890   3
  -2  15   1 -1.7586 2.12809   1
  -2  15   1 1.86291 2.08902   3
   1 -15  -1 44.3591 3.50474   4
   1 -15  -1 36.4174 3.31721   3
   1 -15  -1 41.9616 3.25719   7
   1 -15  -1 39.9563 3.12454   2
  -1  15   1 37.3459 3.81859   3
  -1  15   1 36.2410 4.00509   1
   0 -15  -1 5.07873 1.68927   2
   0 -15  -1 5.08174 1.99094   4
   0 -15  -1 5.35687 2.05384   3
   0 -15  -1 7.01674 1.83449   7
   0  15   1 2.37260 2.30905   1
   0  15   1 4.36338 2.19023   3
  -1 -15  -1 47.2544 3.61210   3
  -1 -15  -1 38.7706 2.94943   2
  -1 -15  -1 45.7881 3.59791   7
   1  15   1 48.7604 4.00938   3
   1  15   1 40.9595 4.09257   1
  -2 -15  -1 174.715 6.15529   2
  -2 -15  -1 177.092 6.47034   3
  -2 -15  -1 186.012 6.67469   7
   2  15   1 163.969 7.36879   1
   2  15   1 180.312 7.30005   3
  -3 -15  -1 2.13460 1.56461   3
  -3 -15  -1 -0.2091 1.40730   2
  -3 -15  -1 0.44566 1.70489   7
   3  15   1 0.21760 2.18540   1
   3  15   1 -0.0764 1.85867   3
  -4 -15  -1 54.3317 3.38790   3
  -4 -15  -1 57.1695 3.14166   2
  -4 -15  -1 56.7452 4.11263   6
  -4 -15  -1 59.9851 3.95056   7
   4  15   1 54.1032 4.27506   3
   4  15   1 54.5066 4.54614   1
  -5 -15  -1 6.46170 2.12137   6
  -5 -15  -1 7.23663 1.70464   2
  -5 -15  -1 7.57447 2.36708   7
  -5 -15  -1 7.75990 1.72731   3
   5  15   1 7.09021 2.39735   3
   5  15   1 3.38972 2.49221   1
  -6 -15  -1 5.93621 2.25676   7
  -6 -15  -1 6.51703 2.17699   6
  -6 -15  -1 4.98337 1.49829   2
  -6 -15  -1 5.50092 1.46853   3
   6  15   1 6.49889 2.33749   3
   6  15   1 6.37748 2.62804   1
  -7 -15  -1 32.6354 3.33140   6
  -7 -15  -1 29.7134 3.44096   7
  -7 -15  -1 30.3547 2.27170   3
   7  15   1 24.0171 3.10257   3
   7  15   1 27.5728 3.57593   1
  -8 -15  -1 122.855 6.06910   7
  -8 -15  -1 115.589 5.71227   6
  -8 -15  -1 121.186 3.88203   3
   8  15   1 124.628 6.37404   1
   8  15   1 113.691 5.64066   3
  -9 -15  -1 15.0658 2.62986   6
  -9 -15  -1 18.8309 3.24729   7
   9  15   1 12.2558 2.97726   1
   9  15   1 9.31689 2.47498   3
 -10 -15  -1 103.676 5.86737   7
 -10 -15  -1 97.1222 5.35168   6
  10  15   1 100.500 5.59337   1
  10  15   1 95.0842 5.13943   3
 -11 -15  -1 1.68606 1.93442   6
 -11 -15  -1 0.72637 2.38742   7
  11  15   1 -0.7597 2.43834   1
  11  15   1 -0.3103 2.02593   3
 -12 -15  -1 1.36479 2.43515   7
 -12 -15  -1 3.49237 2.14032   6
  12  15   1 3.58499 2.78097   1
  12  15   1 4.62096 2.16184   3
 -13 -15  -1 -1.8313 2.24216   7
 -13 -15  -1 -2.3996 2.03876   6
  13  15   1 -2.6373 1.86782   3
  13  15   1 -2.6269 2.51236   1
 -14 -15  -1 7.19265 3.35459   7
 -14 -15  -1 9.25398 2.81053   6
  14  15   1 0.17856 2.87675   1
   9 -16  -1 2.68006 2.20747   4
   9 -16  -1 4.44479 2.59414   3
   9 -16  -1 -0.5502 2.23605   2
  -9  16   1 7.69353 3.06897   5
   8 -16  -1 1.29305 2.12349   4
   8 -16  -1 -1.7340 1.96517   2
   8 -16  -1 -0.9251 2.26481   3
  -8  16   1 0.23435 1.95907   3
  -8  16   1 -0.3957 2.18900   5
   7 -16  -1 13.8695 2.75379   2
   7 -16  -1 15.4201 2.64912   4
   7 -16  -1 22.2736 3.37479   3
  -7  16   1 14.5330 3.61642   5
  -7  16   1 14.0471 2.64732   3
   6 -16  -1 14.7479 2.85793   3
   6 -16  -1 18.8708 2.94700   2
   6 -16  -1 18.1241 2.73052   4
   6 -16  -1 15.7160 2.32086   7
  -6  16   1 13.8158 3.24140   5
  -6  16   1 13.4557 2.58226   3
   5 -16  -1 0.82203 1.92921   2
   5 -16  -1 2.92037 1.96653   4
   5 -16  -1 4.74204 2.36165   3
   5 -16  -1 3.80892 1.71020   7
  -5  16   1 0.67566 2.31995   1
  -5  16   1 5.57523 2.22968   3
   4 -16  -1 42.2951 3.57251   2
   4 -16  -1 42.2825 3.66763   4
   4 -16  -1 51.6751 4.26129   3
   4 -16  -1 36.6211 3.12926   7
  -4  16   1 39.1385 4.31915   1
  -4  16   1 37.1621 3.81452   3
   3 -16  -1 9.21254 2.23828   2
   3 -16  -1 10.3419 2.28870   4
   3 -16  -1 6.04932 2.41244   3
   3 -16  -1 5.74885 1.89033   7
  -3  16   1 6.29850 2.64878   1
  -3  16   1 3.57696 2.30257   3
   2 -16  -1 22.1164 2.84687   4
   2 -16  -1 16.5841 2.72751   3
   2 -16  -1 18.7846 2.56490   2
   2 -16  -1 26.0975 2.80231   7
  -2  16   1 20.1131 3.07013   3
  -2  16   1 19.4043 3.47178   1
   1 -16  -1 0.71543 1.61153   2
   1 -16  -1 2.08455 1.89664   4
   1 -16  -1 3.10965 1.96449   3
   1 -16  -1 5.14719 1.95758   7
  -1  16   1 4.94355 2.69410   1
  -1  16   1 4.10246 2.25049   3
   0 -16  -1 -0.3926 1.73921   7
   0 -16  -1 2.65188 1.94254   3
   0 -16  -1 -1.6548 1.41724   2
   0  16   1 1.84179 2.34905   1
   0  16   1 3.00777 2.16979   3
  -1 -16  -1 32.5238 3.14461   3
  -1 -16  -1 30.2760 2.89603   2
  -1 -16  -1 35.5083 3.23614   7
   1  16   1 37.9113 4.21460   1
   1  16   1 39.0767 3.81988   3
  -2 -16  -1 27.7152 3.04694   7
  -2 -16  -1 25.6093 2.71104   3
  -2 -16  -1 28.4386 2.73370   2
   2  16   1 28.2377 3.55063   3
   2  16   1 21.7562 3.44302   1
  -3 -16  -1 9.73550 1.84484   2
  -3 -16  -1 13.2783 2.29053   3
  -3 -16  -1 12.8828 2.51654   7
   3  16   1 14.9867 2.84036   3
   3  16   1 12.2256 3.03061   1
  -4 -16  -1 10.0461 2.01045   3
  -4 -16  -1 11.9087 2.51542   7
  -4 -16  -1 10.5051 1.85649   2
  -4 -16  -1 11.8384 2.46236   6
   4  16   1 9.85737 2.84996   1
   4  16   1 12.8480 2.64212   3
  -5 -16  -1 16.8910 2.75681   6
  -5 -16  -1 14.5699 2.11146   3
  -5 -16  -1 17.2965 3.01354   7
  -5 -16  -1 12.9463 2.09044   2
   5  16   1 10.6399 2.57938   3
   5  16   1 13.8750 3.03443   1
  -6 -16  -1 11.4903 1.86935   3
  -6 -16  -1 13.5462 2.73394   7
  -6 -16  -1 12.8148 2.04513   2
  -6 -16  -1 12.8362 2.63196   6
   6  16   1 13.3363 2.95212   3
   6  16   1 14.3242 3.22007   1
  -7 -16  -1 41.2778 4.00176   7
  -7 -16  -1 39.0597 3.70062   6
  -7 -16  -1 39.5636 2.58214   3
   7  16   1 37.8279 3.75013   3
   7  16   1 48.8502 4.53418   1
  -8 -16  -1 37.9451 4.05875   7
  -8 -16  -1 39.5972 2.62967   3
  -8 -16  -1 31.7327 3.41889   6
   8  16   1 37.3292 3.65840   3
   8  16   1 29.1823 3.92285   1
  -9 -16  -1 26.1291 3.23277   6
  -9 -16  -1 28.5246 3.72687   7
   9  16   1 27.3794 3.41900   3
   9  16   1 28.5293 3.59391   1
 -10 -16  -1 31.5277 3.99258   7
 -10 -16  -1 32.4532 3.53295   6
  10  16   1 30.3453 4.06071   1
  10  16   1 30.6856 3.64263   3
 -11 -16  -1 -2.3319 2.31412   7
 -11 -16  -1 3.81435 2.36809   6
  11  16   1 -2.7716 1.96674   3
  11  16   1 0.49154 2.61585   1
 -12 -16  -1 7.95973 3.16499   7
 -12 -16  -1 9.33297 2.82808   6
  12  16   1 5.89875 2.91000   1
  12  16   1 11.5496 2.67977   3
 -13 -16  -1 2.19739 2.75162   7
 -13 -16  -1 -0.2840 2.31557   6
  13  16   1 -1.1281 2.66398   1
  13  16   1 1.46034 2.28830   3
   8 -17  -1 16.9970 2.94541   4
   8 -17  -1 9.58161 2.71142   2
   8 -17  -1 16.6384 3.35876   3
  -8  17   1 14.2493 3.41895   5
   7 -17  -1 -1.2170 2.31098   3
   7 -17  -1 -1.2545 1.81807   4
   7 -17  -1 3.14217 2.30032   2
  -7  17   1 0.27339 2.93384   5
  -7  17   1 -1.7467 1.97270   3
   6 -17  -1 8.80742 2.62682   3
   6 -17  -1 4.55537 2.08286   4
   6 -17  -1 7.29232 2.38906   2
  -6  17   1 -2.2548 2.39897   5
  -6  17   1 1.39733 2.09408   3
   5 -17  -1 2.69642 1.75449   7
   5 -17  -1 2.84325 2.53203   3
   5 -17  -1 2.43305 2.09815   2
   5 -17  -1 5.76261 2.17057   4
  -5  17   1 2.66762 2.27761   3
  -5  17   1 5.86382 2.59704   1
   4 -17  -1 1.38789 1.89312   2
   4 -17  -1 2.05080 2.36178   3
   4 -17  -1 0.55213 1.94286   4
   4 -17  -1 2.89785 1.96118   7
  -4  17   1 2.07165 2.23604   3
  -4  17   1 1.67824 2.57761   1
   3 -17  -1 1.65576 2.31641   3
   3 -17  -1 5.98671 2.07803   2
   3 -17  -1 3.46034 2.06108   4
   3 -17  -1 6.38370 2.08771   7
  -3  17   1 2.86819 2.61506   1
  -3  17   1 2.87551 2.43079   3
   2 -17  -1 9.68615 2.24287   2
   2 -17  -1 14.1340 2.40009   7
   2 -17  -1 12.4599 2.55457   3
   2 -17  -1 12.7183 2.56054   4
  -2  17   1 11.5167 3.00751   1
  -2  17   1 14.4925 3.07086   3
   1 -17  -1 37.5069 3.31307   2
   1 -17  -1 31.2754 3.25251   7
   1 -17  -1 36.2371 3.53921   4
   1 -17  -1 38.8763 3.63479   3
  -1  17   1 43.1515 4.46731   1
  -1  17   1 39.0043 4.07190   3
   0 -17  -1 68.8154 4.27955   2
   0 -17  -1 77.4254 4.50621   3
   0 -17  -1 75.1911 4.55608   7
   0  17   1 76.2989 5.53494   1
   0  17   1 70.4014 5.23543   3
  -1 -17  -1 10.0643 2.44994   3
  -1 -17  -1 9.85188 2.49497   7
  -1 -17  -1 11.7097 2.09692   2
   1  17   1 13.2980 2.86323   3
   1  17   1 5.32434 2.30577   1
  -2 -17  -1 30.9629 3.46559   7
  -2 -17  -1 24.1200 2.75880   2
  -2 -17  -1 31.5731 3.18580   3
   2  17   1 25.5427 3.77220   1
   2  17   1 27.1087 3.68790   3
  -3 -17  -1 -0.7798 1.50525   3
  -3 -17  -1 -1.2535 1.37547   2
  -3 -17  -1 -1.4069 1.85942   7
   3  17   1 -1.6974 1.99800   3
   3  17   1 1.89274 2.55294   1
  -4 -17  -1 9.27190 2.46275   6
  -4 -17  -1 8.89627 2.45287   7
  -4 -17  -1 7.72031 2.04977   2
  -4 -17  -1 11.7642 2.14213   3
   4  17   1 11.4882 2.94402   3
   4  17   1 10.3227 3.02143   1
  -5 -17  -1 35.0564 2.99156   2
  -5 -17  -1 38.1195 3.02352   3
  -5 -17  -1 39.8415 3.91008   7
  -5 -17  -1 34.9200 3.64145   6
   5  17   1 36.6721 4.01265   3
   5  17   1 40.3914 4.39530   1
  -6 -17  -1 3.03510 1.48407   2
  -6 -17  -1 2.73942 2.13420   6
  -6 -17  -1 0.14369 1.42830   3
  -6 -17  -1 0.02326 2.19960   7
   6  17   1 4.14764 2.33440   3
   6  17   1 3.80236 2.79798   1
  -7 -17  -1 25.5544 2.24571   3
  -7 -17  -1 27.7113 3.37312   6
  -7 -17  -1 28.4329 3.69158   7
   7  17   1 29.8933 3.57558   3
   7  17   1 32.7706 3.91445   1
  -8 -17  -1 -0.9796 1.97200   6
  -8 -17  -1 -2.6295 2.13244   7
   8  17   1 1.96767 2.56293   1
   8  17   1 0.66449 2.30572   3
  -9 -17  -1 2.06304 2.21004   6
  -9 -17  -1 8.42473 2.91738   7
   9  17   1 8.15318 2.64573   3
   9  17   1 2.58682 2.69174   1
 -10 -17  -1 -1.5795 2.38663   7
 -10 -17  -1 3.39322 2.22505   6
  10  17   1 5.48158 2.55510   3
  10  17   1 -0.2870 2.66816   1
 -11 -17  -1 1.49627 2.16087   6
 -11 -17  -1 0.38348 2.50240   7
  11  17   1 -2.1398 2.23777   3
  11  17   1 -1.2987 2.67645   1
 -12 -17  -1 21.9920 3.84286   7
 -12 -17  -1 20.8595 3.23522   6
  12  17   1 23.7731 4.02579   1
  12  17   1 26.4752 3.64292   3
   7 -18  -1 5.08119 2.66344   3
   6 -18  -1 36.0345 3.67306   4
   6 -18  -1 37.2062 4.05328   3
   6 -18  -1 30.4367 3.53501   2
  -6  18   1 24.4913 4.16469   5
  -6  18   1 30.0192 3.51686   3
   5 -18  -1 131.972 6.32055   2
   5 -18  -1 155.022 7.11243   3
   5 -18  -1 142.354 6.63912   4
  -5  18   1 133.198 6.65128   3
   4 -18  -1 15.1410 2.78707   4
   4 -18  -1 14.2624 2.66975   2
   4 -18  -1 8.58294 2.76750   3
   4 -18  -1 17.2845 2.67630   7
  -4  18   1 11.0012 3.20194   1
  -4  18   1 18.0290 3.32351   3
   3 -18  -1 2.41862 2.41706   3
   3 -18  -1 -1.5439 1.74323   2
   3 -18  -1 5.81285 2.53289   4
   3 -18  -1 -2.2307 1.71199   7
  -3  18   1 0.17986 2.42131   1
  -3  18   1 3.32657 2.41710   3
   2 -18  -1 4.24085 1.97885   2
   2 -18  -1 -0.6738 1.92919   7
   2 -18  -1 5.04517 2.22785   3
   2 -18  -1 3.96579 2.15848   4
  -2  18   1 4.16771 2.65064   3
  -2  18   1 0.57737 2.57210   1
   1 -18  -1 21.8915 3.18581   3
   1 -18  -1 24.6347 3.01730   7
   1 -18  -1 22.5926 2.82887   2
  -1  18   1 21.8149 3.38714   1
  -1  18   1 28.7064 3.79504   3
   0 -18  -1 0.75542 2.06288   7
   0 -18  -1 -1.5940 1.61062   2
   0 -18  -1 1.76043 2.08539   3
   0  18   1 5.14269 2.80317   1
   0  18   1 5.29662 2.51306   3
  -1 -18  -1 0.67412 1.98953   7
  -1 -18  -1 1.23063 1.71604   2
  -1 -18  -1 1.20508 1.83770   3
   1  18   1 3.29936 2.67079   1
   1  18   1 1.15152 2.58986   3
  -2 -18  -1 26.2720 2.83738   2
  -2 -18  -1 26.7569 2.99960   3
  -2 -18  -1 24.2457 3.34849   7
   2  18   1 30.0172 3.91520   3
   2  18   1 31.5820 4.23863   1
  -3 -18  -1 6.29034 2.56568   7
  -3 -18  -1 4.58105 1.77773   2
  -3 -18  -1 6.77291 2.16144   3
   3  18   1 4.94005 2.70973   3
[truncated: 3,239,303 more chars]
