# Supplementary material for: A crystalline monosubstituted carbene
Source: Springer Nature journal article supplement (doi:10.1038/s41557-018-0153-1), 2018-10-05
Supplement: 41557_2018_153_MOESM75_ESM.cif [file 41557_2018_153_MOESM75_ESM.cif]

data_gb_rj_rn_112917_0m_a_sq
_audit_creation_date              2017-12-04
_audit_creation_method
;
Olex2 1.2-beta
(compiled 2017.08.10 svn.r3458 for OlexSys, GUI svn.r5381)
;
_shelx_SHELXL_version_number      '2016/6'
_publ_contact_author_address      ?
_publ_contact_author_email        ?
_publ_contact_author_id_orcid     ?
_publ_contact_author_name         ''
_publ_contact_author_phone        ?
_publ_section_references
;
Dolomanov, O.V., Bourhis, L.J., Gildea, R.J, Howard, J.A.K. & Puschmann, H.
 (2009), J. Appl. Cryst. 42, 339-341.

Sheldrick, G.M. (2015). Acta Cryst. A71, 3-8.

Sheldrick, G.M. (2015). Acta Cryst. C71, 3-8.
;
_chemical_name_common             ?
_chemical_name_systematic         ?
_chemical_formula_moiety          'C103 H53 F48 N'
_chemical_formula_sum             'C103 H53 F48 N'
_chemical_formula_weight          2216.46
_chemical_melting_point           ?
loop_
  _atom_type_symbol
  _atom_type_description
  _atom_type_scat_dispersion_real
  _atom_type_scat_dispersion_imag
  _atom_type_scat_source
 'C' 'C' 0.0033 0.0016 'International Tables Vol C Tables 4.2.6.8 and 6.1.1.4'
 'H' 'H' 0.0000 0.0000 'International Tables Vol C Tables 4.2.6.8 and 6.1.1.4'
 'F' 'F' 0.0171 0.0103 'International Tables Vol C Tables 4.2.6.8 and 6.1.1.4'
 'N' 'N' 0.0061 0.0033 'International Tables Vol C Tables 4.2.6.8 and 6.1.1.4'

_shelx_space_group_comment
;
The symmetry employed for this shelxl refinement is uniquely defined
by the following loop, which should always be used as a source of
symmetry information in preference to the above space-group names.
They are only intended as comments.
;
_space_group_crystal_system       'triclinic'
_space_group_IT_number            2
_space_group_name_H-M_alt         'P -1'
_space_group_name_Hall            '-P 1'
loop_
  _space_group_symop_operation_xyz
 'x, y, z'
 '-x, -y, -z'

_cell_length_a                    16.0386(8)
_cell_length_b                    18.5013(12)
_cell_length_c                    18.5527(12)
_cell_angle_alpha                 107.434(2)
_cell_angle_beta                  114.354(2)
_cell_angle_gamma                 90.861(2)
_cell_volume                      4723.7(5)
_cell_formula_units_Z             2
_cell_measurement_reflns_used     9806
_cell_measurement_temperature     100.0
_cell_measurement_theta_max       25.32
_cell_measurement_theta_min       2.25
_shelx_estimated_absorpt_T_max    0.984
_shelx_estimated_absorpt_T_min    0.969
_exptl_absorpt_coefficient_mu     0.157
_exptl_absorpt_correction_T_max   0.7452
_exptl_absorpt_correction_T_min   0.7170
_exptl_absorpt_correction_type    multi-scan
_exptl_absorpt_process_details
'SADABS-2016/2 (Bruker,2016/2) was used for absorption correction. wR2(int) was 0.0838 before and 0.0395 after correction. The Ratio of minimum to maximum transmission is 0.9622. The \l/2 correction factor is Not present.'
_exptl_absorpt_special_details    ?
_exptl_crystal_colour             'clear colourless'
_exptl_crystal_colour_lustre      clear
_exptl_crystal_colour_primary     colourless
_exptl_crystal_density_diffrn     1.558
_exptl_crystal_density_meas       ?
_exptl_crystal_density_method     ?
_exptl_crystal_description        plate
_exptl_crystal_F_000              2220
_exptl_crystal_size_max           0.2
_exptl_crystal_size_mid           0.2
_exptl_crystal_size_min           0.1
_exptl_transmission_factor_max    ?
_exptl_transmission_factor_min    ?
_diffrn_reflns_av_R_equivalents   0.0327
_diffrn_reflns_av_unetI/netI      0.0311
_diffrn_reflns_Laue_measured_fraction_full 0.998
_diffrn_reflns_Laue_measured_fraction_max 0.996
_diffrn_reflns_limit_h_max        19
_diffrn_reflns_limit_h_min        -19
_diffrn_reflns_limit_k_max        22
_diffrn_reflns_limit_k_min        -22
_diffrn_reflns_limit_l_max        22
_diffrn_reflns_limit_l_min        -22
_diffrn_reflns_number             74556
_diffrn_reflns_point_group_measured_fraction_full 0.998
_diffrn_reflns_point_group_measured_fraction_max 0.996
_diffrn_reflns_theta_full         25.242
_diffrn_reflns_theta_max          25.406
_diffrn_reflns_theta_min          1.683
_diffrn_ambient_temperature       100.0
_diffrn_detector                  'Bruker APEX2 area detector'
_diffrn_detector_area_resol_mean  7.9
_diffrn_detector_type             'CCD area detector'
_diffrn_measured_fraction_theta_full 0.998
_diffrn_measured_fraction_theta_max 0.996
_diffrn_measurement_device        'three-circle diffractometer'
_diffrn_measurement_device_type   'Bruker APEX II Ultra'
_diffrn_measurement_method        '\w and \f scans'
_diffrn_radiation_monochromator   'mirror optics'
_diffrn_radiation_probe           x-ray
_diffrn_radiation_type            MoK\a
_diffrn_radiation_wavelength      0.71073
_diffrn_source                    'microfocus sealed X-ray tube'
_diffrn_source_type               'Incoatec I\ms'
_diffrn_standards_number          0
_reflns_Friedel_coverage          0.000
_reflns_Friedel_fraction_full     .
_reflns_Friedel_fraction_max      .
_reflns_number_gt                 12644
_reflns_number_total              17345
_reflns_special_details
;
 Reflections were merged by SHELXL according to the crystal
 class for the calculation of statistics and refinement.
 
 Structure factors included contributions from the .fab file.
 
 _reflns_Friedel_fraction is defined as the number of unique
 Friedel pairs measured divided by the number that would be
 possible theoretically, ignoring centric projections and
 systematic absences.
;
_reflns_threshold_expression      'I > 2\s(I)'
_computing_cell_refinement        'SAINT v8.37A (Bruker, 2016)'
_computing_data_collection        'APEX3 v2016.1-0 (Bruker, 2016)'
_computing_data_reduction         'SAINT v8.37A (Bruker, 2016)'
_computing_molecular_graphics     'Olex2 (Dolomanov et al., 2009)'
_computing_publication_material   'Olex2 (Dolomanov et al., 2009)'
_computing_structure_refinement   'ShelXL (Sheldrick, 2015)'
_computing_structure_solution     'ShelXT (Sheldrick, 2015)'
_refine_diff_density_max          0.710
_refine_diff_density_min          -0.536
_refine_diff_density_rms          0.062
_refine_ls_extinction_coef        .
_refine_ls_extinction_method      none
_refine_ls_goodness_of_fit_ref    1.017
_refine_ls_hydrogen_treatment     constr
_refine_ls_matrix_type            full
_refine_ls_number_parameters      1481
_refine_ls_number_reflns          17345
_refine_ls_number_restraints      204
_refine_ls_R_factor_all           0.0901
_refine_ls_R_factor_gt            0.0629
_refine_ls_restrained_S_all       1.034
_refine_ls_shift/su_max           0.000
_refine_ls_shift/su_mean          0.000
_refine_ls_structure_factor_coef  Fsqd
_refine_ls_weighting_details
'w=1/[\s^2^(Fo^2^)+(0.0807P)^2^+7.0798P] where P=(Fo^2^+2Fc^2^)/3'
_refine_ls_weighting_scheme       calc
_refine_ls_wR_factor_gt           0.1588
_refine_ls_wR_factor_ref          0.1788
_refine_special_details           ?
_olex2_refinement_description
;
1. Fixed Uiso
 At 1.2 times of:
  All C(H) groups, All C(H,H) groups
 At 1.5 times of:
  All C(H,H,H) groups
2. Restrained distances
 F32-C81 = F32A-C81A = F31-C81 = F31A-C81A = F33-C81 = F33A-C81A
 1.32 with sigma of 0.02
 F34-C80A = F35-C80 = F35A-C80A = F34A-C80 = F36A-C80A = F36-C80
 1.32 with sigma of 0.02
 F22-C59 = F23A-C59 = F22A-C59 = F24-C59 = F24A-C59 = F23-C59
 1.32 with sigma of 0.02
 F48-C102 = F46A-C102 = F46-C102 = F47A-C102 = F47-C102 = F48A-C102
 1.31 with sigma of 0.01
3. Uiso/Uaniso restraints and constraints
Uanis(C81A) = Uanis(C81)
Uanis(C80) = Uanis(C80A)
Uanis(F31) = Uanis(F31A)
Uanis(F33) = Uanis(F33A)
Uanis(F32A) = Uanis(F32)
Uanis(C81) = Uanis(C81A)
Uanis(F46A) = Uanis(F46)
Uanis(F47A) = Uanis(F47)
Uanis(F48) = Uanis(F48A)
4. Rigid body (RIGU) restrains
 F24, F24A, C59, F23, F23A, F22, F22A
 with sigma for 1-2 distances of 0.004 and sigma for 1-3 distances of 0.004
 F5A, F5, C28, F4A, F4, F6A, F6
 with sigma for 1-2 distances of 0.004 and sigma for 1-3 distances of 0.004
 F46A, F46, F47A, F47, F48A, F48, C102
 with sigma for 1-2 distances of 0.004 and sigma for 1-3 distances of 0.004
 C81
 with sigma for 1-2 distances of 0.004 and sigma for 1-3 distances of 0.004
 C80
 with sigma for 1-2 distances of 0.004 and sigma for 1-3 distances of 0.004
 C81, F32, F31, F33
 with sigma for 1-2 distances of 0.004 and sigma for 1-3 distances of 0.004
 F32A, C81A, F31A, F33A
 with sigma for 1-2 distances of 0.004 and sigma for 1-3 distances of 0.004
 F34, C80A, F35A, F36A
 with sigma for 1-2 distances of 0.004 and sigma for 1-3 distances of 0.004
 F34A, C80, F35, F36
 with sigma for 1-2 distances of 0.004 and sigma for 1-3 distances of 0.004
5. Others
 Sof(F22A)=Sof(F24A)=Sof(F23A)=1-FVAR(1)
 Sof(F22)=Sof(F23)=Sof(F24)=FVAR(1)
 Sof(F4A)=Sof(F5A)=Sof(F6A)=1-FVAR(2)
 Sof(F5)=Sof(F6)=Sof(F4)=FVAR(2)
 Sof(F48)=Sof(F46)=Sof(F47)=1-FVAR(3)
 Sof(F46A)=Sof(F48A)=Sof(F47A)=FVAR(3)
 Sof(F32A)=Sof(C81A)=Sof(F31A)=Sof(F33A)=1-FVAR(4)
 Sof(C81)=Sof(F32)=Sof(F33)=Sof(F31)=FVAR(4)
 Sof(F34)=Sof(F35A)=Sof(F36A)=Sof(C80A)=1-FVAR(5)
 Sof(C80)=Sof(F34A)=Sof(F36)=Sof(F35)=FVAR(5)
6.a Ternary CH refined with riding coordinates:
 C1(H1), C2(H2), C3(H3)
6.b Secondary CH2 refined with riding coordinates:
 C4(H4A,H4B), C6(H6A,H6B)
6.c Aromatic/amide H refined with riding coordinates:
 C39(H39), C65(H65), C17(H17), C57(H57), C35(H35), C31(H31), C83(H83),
 C93(H93), C67(H67), C21(H21), C63(H63), C87(H87), C27(H27), C61(H61), C89(H89),
  C55(H55), C13(H13), C53(H53), C69(H69), C41(H41), C23(H23), C43(H43),
 C75(H75), C19(H19), C33(H33), C85(H85), C71(H71), C10(H10), C91(H91), C79(H79),
  C12(H12), C45(H45), C25(H25), C11(H11), C101(H101), C97(H97), C49(H49),
 C99(H99), C77(H77), C47(H47)
6.d Idealised Me refined as rotating group:
 C7(H7A,H7B,H7C), C5(H5A,H5B,H5C)
;
_atom_sites_solution_hydrogens    geom
_atom_sites_solution_primary      dual
_atom_sites_solution_secondary    ?
loop_
  _atom_site_label
  _atom_site_type_symbol
  _atom_site_fract_x
  _atom_site_fract_y
  _atom_site_fract_z
  _atom_site_U_iso_or_equiv
  _atom_site_adp_type
  _atom_site_occupancy
  _atom_site_site_symmetry_order
  _atom_site_calc_flag
  _atom_site_refinement_flags_posn
  _atom_site_refinement_flags_adp
  _atom_site_refinement_flags_occupancy
  _atom_site_disorder_assembly
  _atom_site_disorder_group
 F10 F -0.08866(12) 0.22686(13) 0.31431(13) 0.0525(5) Uani 1 1 d . . . . .
 F20 F 1.05134(13) 0.43915(11) 1.18083(11) 0.0461(5) Uani 1 1 d . . . . .
 F39 F -0.14883(13) 0.04654(13) 0.24085(15) 0.0617(6) Uani 1 1 d . . . . .
 F21 F 0.95706(12) 0.51441(11) 1.13821(12) 0.0465(5) Uani 1 1 d . . . . .
 F19 F 1.04822(13) 0.47735(13) 1.08205(12) 0.0539(6) Uani 1 1 d . . . . .
 F37 F -0.18390(13) -0.03777(14) 0.28221(15) 0.0610(6) Uani 1 1 d . . . . .
 F11 F 0.01262(13) 0.24699(14) 0.44036(12) 0.0540(6) Uani 1 1 d . . . . .
 F30 F 0.90648(13) 0.42335(14) 1.23345(12) 0.0561(6) Uani 1 1 d . . . . .
 F40 F 0.23898(14) -0.05098(14) 0.29435(14) 0.0586(6) Uani 1 1 d . . . . .
 F28 F 0.80613(14) 0.40350(16) 1.27499(12) 0.0660(7) Uani 1 1 d . . . . .
 F7 F -0.03641(14) 0.02840(13) 0.11189(13) 0.0631(6) Uani 1 1 d . . . . .
 F29 F 0.83603(17) 0.31002(14) 1.19264(14) 0.0717(7) Uani 1 1 d . . . . .
 F8 F 0.09415(18) -0.01074(14) 0.15037(14) 0.0734(7) Uani 1 1 d . . . . .
 F17 F 0.85746(16) 0.69608(13) 0.88547(15) 0.0621(6) Uani 1 1 d . . . . .
 F12 F 0.01643(16) 0.32610(13) 0.37764(18) 0.0675(7) Uani 1 1 d . . . . .
 F41 F 0.23814(17) -0.12683(15) 0.36100(16) 0.0703(7) Uani 1 1 d . . . . .
 F27 F 0.70709(19) 0.54715(13) 0.97534(15) 0.0680(7) Uani 1 1 d . . . . .
 F9 F 0.07016(19) 0.07475(16) 0.09176(13) 0.0796(8) Uani 1 1 d . . . . .
 F42 F 0.13914(15) -0.15202(14) 0.23201(15) 0.0714(8) Uani 1 1 d . . . . .
 N1 N 0.40865(15) 0.25338(14) 0.68334(14) 0.0253(5) Uani 1 1 d . . . . .
 F18 F 0.7762(2) 0.75526(13) 0.80278(18) 0.0786(8) Uani 1 1 d . . . . .
 F3 F 0.84592(15) 0.17032(17) 0.42258(18) 0.0757(8) Uani 1 1 d . . . . .
 F2 F 0.80269(18) 0.14245(17) 0.50464(17) 0.0773(8) Uani 1 1 d . . . . .
 F25 F 0.7491(2) 0.60816(13) 1.10344(15) 0.0826(9) Uani 1 1 d . . . . .
 F38 F -0.15514(16) -0.07231(18) 0.17729(15) 0.1021(12) Uani 1 1 d . . . . .
 F13 F 0.5749(2) 0.5830(2) 0.50100(19) 0.1060(11) Uani 1 1 d . . . . .
 F44 F -0.15721(18) 0.32352(17) 0.56632(19) 0.0938(10) Uani 1 1 d . . . . .
 F45 F -0.14196(19) 0.40173(17) 0.6855(2) 0.1125(13) Uani 1 1 d . . . . .
 F16 F 0.7270(2) 0.71826(14) 0.87934(18) 0.0758(7) Uani 1 1 d . . . . .
 F43 F -0.22426(16) 0.29247(19) 0.6333(2) 0.1095(13) Uani 1 1 d . . . . .
 F1 F 0.74944(17) 0.07030(15) 0.3783(2) 0.1089(13) Uani 1 1 d . . . . .
 F26 F 0.60657(19) 0.57822(15) 1.0183(3) 0.1032(12) Uani 1 1 d . . . . .
 C60 C 0.41682(18) 0.21410(16) 0.80641(16) 0.0235(6) Uani 1 1 d . . . . .
 C14 C 0.43583(18) 0.13125(16) 0.68398(16) 0.0250(6) Uani 1 1 d . . . . .
 C56 C 0.92213(18) 0.38634(17) 1.04790(17) 0.0269(6) Uani 1 1 d . . . . .
 C15 C 0.38267(18) 0.19301(17) 0.71034(16) 0.0245(6) Uani 1 1 d . . . . .
 C82 C 0.27638(18) 0.16919(17) 0.66349(17) 0.0250(6) Uani 1 1 d . . . . .
 C40 C 0.66215(19) 0.41898(17) 0.74134(18) 0.0276(6) Uani 1 1 d . . . . .
 C30 C 0.22009(18) 0.18404(16) 0.36228(17) 0.0241(6) Uani 1 1 d . . . . .
 C39 C 0.58304(18) 0.36397(17) 0.69041(17) 0.0263(6) Uani 1 1 d . . . . .
 H39 H 0.537115 0.371161 0.641714 0.032 Uiso 1 1 calc R . . . .
 C65 C 0.38416(18) 0.16482(17) 0.83606(17) 0.0246(6) Uani 1 1 d . . . . .
 H65 H 0.335199 0.123607 0.797353 0.030 Uiso 1 1 calc R . . . .
 C74 C 0.39287(18) 0.11610(17) 0.95052(17) 0.0263(6) Uani 1 1 d . . . . .
 C17 C 0.35233(18) 0.21472(16) 0.50515(16) 0.0232(6) Uani 1 1 d . . . . .
 H17 H 0.308176 0.213270 0.526742 0.028 Uiso 1 1 calc R . . . .
 C64 C 0.42188(18) 0.17470(16) 0.92163(17) 0.0245(6) Uani 1 1 d . . . . .
 C57 C 0.85493(18) 0.39604(17) 0.97671(17) 0.0257(6) Uani 1 1 d . . . . .
 H57 H 0.853950 0.445495 0.971227 0.031 Uiso 1 1 calc R . . . .
 C35 C 0.1849(2) 0.12783(17) 0.28314(17) 0.0282(6) Uani 1 1 d . . . . .
 H35 H 0.225781 0.099809 0.264793 0.034 Uiso 1 1 calc R . . . .
 C66 C 0.60336(18) 0.34978(16) 1.01004(17) 0.0244(6) Uani 1 1 d . . . . .
 C95 C -0.1283(2) -0.01878(18) 0.25123(19) 0.0342(7) Uani 1 1 d . . . . .
 C20 C 0.48109(19) 0.21805(16) 0.44175(17) 0.0256(6) Uani 1 1 d . . . . .
 C92 C -0.02804(19) -0.01352(17) 0.30906(18) 0.0281(6) Uani 1 1 d . . . . .
 C31 C 0.15865(19) 0.22394(17) 0.38789(17) 0.0258(6) Uani 1 1 d . . . . .
 H31 H 0.181542 0.262437 0.441699 0.031 Uiso 1 1 calc R . . . .
 C83 C 0.23584(18) 0.11744(17) 0.58233(17) 0.0242(6) Uani 1 1 d . . . . .
 H83 H 0.274539 0.093255 0.558228 0.029 Uiso 1 1 calc R . . . .
 C52 C 0.78823(18) 0.33433(16) 0.91247(17) 0.0231(6) Uani 1 1 d . . . . .
 C22 C 0.5511(2) 0.22096(17) 0.40933(17) 0.0285(6) Uani 1 1 d . . . . .
 C16 C 0.44600(18) 0.23050(16) 0.55959(16) 0.0231(6) Uani 1 1 d . . . . .
 C62 C 0.52472(18) 0.28713(16) 0.95023(17) 0.0234(6) Uani 1 1 d . . . . .
 C93 C 0.00698(18) 0.03743(16) 0.39065(17) 0.0251(6) Uani 1 1 d . . . . .
 H93 H -0.032494 0.068263 0.408257 0.030 Uiso 1 1 calc R . . . .
 C8 C 0.48085(18) 0.23863(17) 0.65350(16) 0.0242(6) Uani 1 1 d . . . . .
 C67 C 0.6083(2) 0.42062(17) 0.99847(18) 0.0290(6) Uani 1 1 d . . . . .
 H67 H 0.560206 0.429365 0.952048 0.035 Uiso 1 1 calc R . . . .
 C9 C 0.49361(18) 0.15791(17) 0.65684(16) 0.0251(6) Uani 1 1 d . . . . .
 C34 C 0.0897(2) 0.11246(18) 0.23054(18) 0.0310(7) Uani 1 1 d . . . . .
 C21 C 0.50997(19) 0.23130(16) 0.52673(17) 0.0255(6) Uani 1 1 d . . . . .
 H21 H 0.574398 0.241081 0.563175 0.031 Uiso 1 1 calc R . . . .
 C63 C 0.49087(18) 0.23726(16) 0.97816(17) 0.0248(6) Uani 1 1 d . . . . .
 H63 H 0.515031 0.245843 1.036694 0.030 Uiso 1 1 calc R . . . .
 C54 C 0.8572(2) 0.25438(18) 0.99669(19) 0.0318(7) Uani 1 1 d . . . . .
 C42 C 0.71703(18) 0.34445(16) 0.83513(17) 0.0238(6) Uani 1 1 d . . . . .
 C87 C 0.21958(19) 0.20414(17) 0.69835(17) 0.0258(6) Uani 1 1 d . . . . .
 H87 H 0.246581 0.239389 0.754182 0.031 Uiso 1 1 calc R . . . .
 C27 C 0.62825(19) 0.18417(18) 0.43346(18) 0.0305(7) Uani 1 1 d . . . . .
 H27 H 0.635994 0.156852 0.471170 0.037 Uiso 1 1 calc R . . . .
 C84 C 0.13976(18) 0.09971(16) 0.53482(17) 0.0236(6) Uani 1 1 d . . . . .
 C18 C 0.32139(18) 0.20088(16) 0.41926(17) 0.0242(6) Uani 1 1 d . . . . .
 C61 C 0.48770(18) 0.27459(16) 0.86385(16) 0.0240(6) Uani 1 1 d . . . . .
 H61 H 0.511486 0.308022 0.844249 0.029 Uiso 1 1 calc R . . . .
 C32 C 0.06363(19) 0.20781(18) 0.33506(18) 0.0298(7) Uani 1 1 d . . . . .
 C89 C 0.15419(19) -0.00277(17) 0.41738(19) 0.0307(7) Uani 1 1 d . . . . .
 H89 H 0.217117 -0.000539 0.454443 0.037 Uiso 1 1 calc R . . . .
 C38 C 0.56975(18) 0.29870(16) 0.70923(16) 0.0236(6) Uani 1 1 d . . . . .
 C70 C 0.7493(2) 0.39656(18) 1.13462(18) 0.0310(7) Uani 1 1 d . . . . .
 C88 C 0.09950(18) 0.04408(16) 0.44735(17) 0.0245(6) Uani 1 1 d . . . . .
 F15 F 0.7086(2) 0.5647(3) 0.5162(2) 0.1238(14) Uani 1 1 d . . . . .
 C36 C 0.0008(2) 0.2518(2) 0.3661(2) 0.0390(8) Uani 1 1 d . . . . .
 C55 C 0.9240(2) 0.31536(18) 1.05917(18) 0.0311(7) Uani 1 1 d . . . . .
 H55 H 0.969719 0.308818 1.108349 0.037 Uiso 1 1 calc R . . . .
 C13 C 0.4330(2) 0.05713(18) 0.68747(18) 0.0320(7) Uani 1 1 d . . . . .
 H13 H 0.393186 0.039173 0.706890 0.038 Uiso 1 1 calc R . . . .
 C53 C 0.79123(19) 0.26332(17) 0.92421(18) 0.0280(6) Uani 1 1 d . . . . .
 H53 H 0.747237 0.220228 0.881735 0.034 Uiso 1 1 calc R . . . .
 C69 C 0.7545(2) 0.46675(18) 1.12290(19) 0.0333(7) Uani 1 1 d . . . . .
 H69 H 0.805877 0.506206 1.160880 0.040 Uiso 1 1 calc R . . . .
 C41 C 0.72866(18) 0.40833(17) 0.81317(17) 0.0258(6) Uani 1 1 d . . . . .
 H41 H 0.783129 0.445443 0.847911 0.031 Uiso 1 1 calc R . . . .
 C23 C 0.5417(2) 0.26096(19) 0.35490(19) 0.0360(7) Uani 1 1 d . . . . .
 H23 H 0.489606 0.286299 0.337435 0.043 Uiso 1 1 calc R . . . .
 C37 C 0.0544(2) 0.0514(2) 0.1456(2) 0.0431(8) Uani 1 1 d . . . . .
 F14 F 0.6003(3) 0.4708(2) 0.47251(18) 0.1207(14) Uani 1 1 d . . . . .
 C43 C 0.63691(18) 0.28953(16) 0.78122(16) 0.0232(6) Uani 1 1 d . . . . .
 H43 H 0.628498 0.244962 0.794395 0.028 Uiso 1 1 calc R . . . .
 C86 C 0.12327(19) 0.18833(17) 0.65266(18) 0.0277(6) Uani 1 1 d . . . . .
 F5 F 0.6373(12) 0.3739(4) 0.3080(7) 0.103(4) Uani 0.522(17) 1 d . U P A 1
 C75 C 0.37915(19) 0.03859(17) 0.90480(17) 0.0280(6) Uani 1 1 d . . . . .
 H75 H 0.385243 0.023862 0.853775 0.034 Uiso 1 1 calc R . . . .
 C58 C 0.9947(2) 0.45391(18) 1.11236(18) 0.0322(7) Uani 1 1 d . . . . .
 C68 C 0.6832(2) 0.47846(17) 1.05449(19) 0.0316(7) Uani 1 1 d . . . . .
 C24 C 0.6085(2) 0.2642(2) 0.3256(2) 0.0421(8) Uani 1 1 d . . . . .
 C19 C 0.38631(19) 0.20275(16) 0.38786(17) 0.0249(6) Uani 1 1 d . . . . .
 H19 H 0.366156 0.193594 0.329580 0.030 Uiso 1 1 calc R . . . .
 C90 C 0.1190(2) -0.05213(18) 0.3353(2) 0.0329(7) Uani 1 1 d . . . . .
 C33 C 0.0291(2) 0.15226(18) 0.25618(19) 0.0327(7) Uani 1 1 d . . . . .
 H33 H -0.035475 0.141678 0.220153 0.039 Uiso 1 1 calc R . . . .
 C1 C 0.3801(2) 0.32614(17) 0.70494(19) 0.0313(7) Uani 1 1 d . . . . .
 H1 H 0.404993 0.353034 0.766859 0.038 Uiso 1 1 calc R . . . .
 F6 F 0.6428(7) 0.2795(4) 0.2179(6) 0.068(2) Uani 0.522(17) 1 d . U P A 1
 C44 C 0.67668(19) 0.48742(18) 0.71948(19) 0.0326(7) Uani 1 1 d . . . . .
 C85 C 0.08406(19) 0.13603(17) 0.57167(17) 0.0267(6) Uani 1 1 d . . . . .
 H85 H 0.018510 0.124640 0.540709 0.032 Uiso 1 1 calc R . . . .
 C29 C 0.7723(2) 0.1426(2) 0.4272(2) 0.0435(8) Uani 1 1 d . . . . .
 C71 C 0.67504(19) 0.33868(17) 1.07889(17) 0.0274(6) Uani 1 1 d . . . . .
 H71 H 0.672823 0.290789 1.087634 0.033 Uiso 1 1 calc R . . . .
 C10 C 0.5501(2) 0.11070(18) 0.63147(19) 0.0340(7) Uani 1 1 d . . . . .
 H10 H 0.590281 0.129116 0.612738 0.041 Uiso 1 1 calc R . . . .
 C72 C 0.8245(2) 0.3832(2) 1.2090(2) 0.0407(8) Uani 1 1 d . . . . .
 C26 C 0.6937(2) 0.18685(19) 0.40332(18) 0.0344(7) Uani 1 1 d . . . . .
 F22 F 0.9099(5) 0.1821(4) 1.0841(4) 0.060(2) Uani 0.534(12) 1 d D U P B 1
 F46A F 0.1565(3) 0.2768(2) 0.94869(19) 0.0787(10) Uani 0.742(4) 1 d D U P C 1
 C76 C 0.3569(2) -0.01744(18) 0.93194(19) 0.0333(7) Uani 1 1 d . . . . .
 C91 C 0.0268(2) -0.05810(18) 0.27982(19) 0.0332(7) Uani 1 1 d . . . . .
 H91 H 0.002362 -0.091917 0.223403 0.040 Uiso 1 1 calc R . . . .
 C79 C 0.3849(2) 0.1359(2) 1.0256(2) 0.0391(8) Uani 1 1 d . . . . .
 H79 H 0.393327 0.188430 1.057775 0.047 Uiso 1 1 calc R . . . .
 C12 C 0.4890(2) 0.01019(19) 0.6622(2) 0.0381(8) Uani 1 1 d . . . . .
 H12 H 0.487897 -0.040488 0.664290 0.046 Uiso 1 1 calc R . . . .
 C45 C 0.7163(2) 0.55868(19) 0.7816(2) 0.0379(8) Uani 1 1 d . . . . .
 H45 H 0.733954 0.563647 0.838603 0.046 Uiso 1 1 calc R . . . .
 C25 C 0.6844(2) 0.2270(2) 0.3495(2) 0.0400(8) Uani 1 1 d . . . . .
 H25 H 0.729481 0.229164 0.329121 0.048 Uiso 1 1 calc R . . . .
 C73 C 0.6867(2) 0.55289(19) 1.0388(2) 0.0419(8) Uani 1 1 d . . . . .
 C11 C 0.5472(2) 0.03674(19) 0.6337(2) 0.0395(8) Uani 1 1 d . . . . .
 H11 H 0.584939 0.003943 0.615806 0.047 Uiso 1 1 calc R . . . .
 C96 C 0.06574(19) 0.22845(18) 0.69311(19) 0.0335(7) Uani 1 1 d . . . . .
 C59 C 0.8565(3) 0.1774(2) 1.0073(2) 0.0511(9) Uani 1 1 d D U . . .
 C98 C -0.0623(2) 0.2967(2) 0.6895(2) 0.0554(11) Uani 1 1 d . . . . .
 C94 C 0.1831(2) -0.0963(2) 0.3054(2) 0.0456(9) Uani 1 1 d . . . . .
 C101 C 0.0909(2) 0.23977(19) 0.7777(2) 0.0369(8) Uani 1 1 d . . . . .
 H101 H 0.143491 0.220315 0.808525 0.044 Uiso 1 1 calc R . . . .
 F48A F 0.0720(4) 0.3600(2) 0.9547(2) 0.0972(15) Uani 0.742(4) 1 d D U P C 1
 C48 C 0.6651(3) 0.5455(2) 0.6158(2) 0.0536(10) Uani 1 1 d . . . . .
 C97 C -0.0116(2) 0.2574(2) 0.6492(2) 0.0436(9) Uani 1 1 d . . . . .
 H97 H -0.029906 0.250439 0.591552 0.052 Uiso 1 1 calc R . . . .
 F47A F 0.0176(4) 0.2420(3) 0.9210(3) 0.115(2) Uani 0.742(4) 1 d D U P C 1
 C49 C 0.6506(2) 0.4813(2) 0.6359(2) 0.0438(8) Uani 1 1 d . . . . .
 H49 H 0.622865 0.433122 0.592635 0.053 Uiso 1 1 calc R . . . .
 C99 C -0.0367(2) 0.3073(2) 0.7731(3) 0.0552(11) Uani 1 1 d . . . . .
 H99 H -0.071753 0.333935 0.800138 0.066 Uiso 1 1 calc R . . . .
 C77 C 0.3492(2) 0.0023(2) 1.0065(2) 0.0426(8) Uani 1 1 d . . . . .
 H77 H 0.333485 -0.036212 1.025042 0.051 Uiso 1 1 calc R . . . .
 C103 C -0.1455(3) 0.3286(3) 0.6437(3) 0.0770(16) Uani 1 1 d . . . . .
 C2 C 0.3695(2) 0.3791(2) 0.6562(2) 0.0407(8) Uani 1 1 d . . . . .
 H2 H 0.376843 0.356513 0.603433 0.049 Uiso 1 1 calc R . . . .
 C100 C 0.0401(2) 0.2791(2) 0.8172(2) 0.0449(9) Uani 1 1 d . . . . .
 C80 C 0.3534(6) -0.1032(6) 0.8827(6) 0.0336(16) Uani 0.596(13) 1 d D U P D 1
 C46 C 0.7304(2) 0.6227(2) 0.7613(2) 0.0435(8) Uani 1 1 d . . . . .
 C78 C 0.3648(3) 0.0793(2) 1.0539(2) 0.0483(9) Uani 1 1 d . . . . .
 C47 C 0.7054(2) 0.6164(2) 0.6786(3) 0.0545(10) Uani 1 1 d . . . . .
 H47 H 0.715727 0.660105 0.664813 0.065 Uiso 1 1 calc R . . . .
 C3 C 0.2846(2) 0.3406(2) 0.6554(2) 0.0407(8) Uani 1 1 d . . . . .
 H3 H 0.246261 0.297398 0.602308 0.049 Uiso 1 1 calc R . . . .
 C102 C 0.0674(3) 0.2889(2) 0.9072(2) 0.0601(11) Uani 1 1 d D U . . .
 C28 C 0.5979(3) 0.3090(3) 0.2684(3) 0.0594(10) Uani 1 1 d . U . . .
 C4 C 0.2293(2) 0.3870(2) 0.6962(2) 0.0439(8) Uani 1 1 d . . . . .
 H4A H 0.269298 0.434877 0.740204 0.053 Uiso 1 1 calc R . . . .
 H4B H 0.207686 0.357266 0.723353 0.053 Uiso 1 1 calc R . . . .
 C50 C 0.6385(4) 0.5393(3) 0.5267(3) 0.0770(15) Uani 1 1 d . . . . .
 C6 C 0.4055(3) 0.4646(2) 0.6993(2) 0.0500(9) Uani 1 1 d . . . . .
 H6A H 0.351585 0.492180 0.685814 0.060 Uiso 1 1 calc R . . . .
 H6B H 0.444050 0.479471 0.674314 0.060 Uiso 1 1 calc R . . . .
 C7 C 0.4625(3) 0.4932(2) 0.7949(2) 0.0564(10) Uani 1 1 d . . . . .
 H7A H 0.514883 0.465093 0.809952 0.085 Uiso 1 1 calc GR . . . .
 H7B H 0.423325 0.484704 0.821433 0.085 Uiso 1 1 calc GR . . . .
 H7C H 0.485912 0.548174 0.814609 0.085 Uiso 1 1 calc GR . . . .
 C81 C 0.3704(6) 0.1020(4) 1.1446(4) 0.0650(18) Uani 0.699(6) 1 d D U P E 1
 C51 C 0.7745(3) 0.6984(2) 0.8315(3) 0.0567(10) Uani 1 1 d . . . . .
 C5 C 0.1454(3) 0.4068(3) 0.6304(3) 0.0784(14) Uani 1 1 d . . . . .
 H5A H 0.108100 0.359518 0.584953 0.118 Uiso 1 1 calc GR . . . .
 H5B H 0.167015 0.440338 0.607459 0.118 Uiso 1 1 calc GR . . . .
 H5C H 0.107462 0.433211 0.656875 0.118 Uiso 1 1 calc GR . . . .
 F23 F 0.7686(4) 0.1572(5) 0.9999(7) 0.103(4) Uani 0.534(12) 1 d D U P B 1
 F24 F 0.8713(10) 0.1288(4) 0.9553(5) 0.108(5) Uani 0.534(12) 1 d D U P B 1
 F4 F 0.5110(5) 0.2984(13) 0.2088(10) 0.134(7) Uani 0.522(17) 1 d . U P A 1
 F22A F 0.9393(5) 0.1483(4) 1.0129(10) 0.119(5) Uani 0.466(12) 1 d D U P B 2
 F24A F 0.7973(6) 0.1197(4) 0.9433(5) 0.076(3) Uani 0.466(12) 1 d D U P B 2
 F23A F 0.8504(14) 0.1722(5) 1.0706(7) 0.126(6) Uani 0.466(12) 1 d D U P B 2
 F4A F 0.5232(6) 0.3501(5) 0.2609(7) 0.069(3) Uani 0.478(17) 1 d . U P A 2
 F5A F 0.6612(8) 0.3745(8) 0.3020(10) 0.114(4) Uani 0.478(17) 1 d . U P A 2
 F6A F 0.5873(18) 0.2763(8) 0.1995(8) 0.147(7) Uani 0.478(17) 1 d . U P A 2
 F48 F 0.1237(10) 0.3508(7) 0.9526(8) 0.0972(15) Uani 0.258(4) 1 d D U P C 2
 F46 F 0.0879(8) 0.2257(6) 0.9193(6) 0.0787(10) Uani 0.258(4) 1 d D U P C 2
 F47 F -0.0098(7) 0.2993(9) 0.9172(8) 0.115(2) Uani 0.258(4) 1 d D U P C 2
 F32 F 0.3896(6) 0.1753(5) 1.1832(6) 0.0591(15) Uani 0.699(6) 1 d D U P E 1
 F33 F 0.2872(5) 0.0730(4) 1.1362(3) 0.116(2) Uani 0.699(6) 1 d D U P E 1
 F31 F 0.4411(6) 0.0761(3) 1.1944(3) 0.123(3) Uani 0.699(6) 1 d D U P E 1
 F32A F 0.3645(16) 0.1607(13) 1.1729(15) 0.0591(15) Uani 0.301(6) 1 d D U P E
 2
 C81A C 0.3398(15) 0.0935(11) 1.1169(11) 0.0650(18) Uani 0.301(6) 1 d D U P E
 2
 F31A F 0.3562(16) 0.0436(8) 1.1595(8) 0.123(3) Uani 0.301(6) 1 d D U P E 2
 F33A F 0.2525(11) 0.1021(10) 1.1032(8) 0.116(2) Uani 0.301(6) 1 d D U P E 2
 F34A F 0.3842(5) -0.1437(5) 0.9341(6) 0.0412(15) Uani 0.596(13) 1 d D U P D 1
 F36 F 0.2666(4) -0.1339(3) 0.8268(4) 0.064(2) Uani 0.596(13) 1 d D U P D 1
 F35 F 0.4052(6) -0.1121(2) 0.8415(4) 0.068(2) Uani 0.596(13) 1 d D U P D 1
 F34 F 0.3759(13) -0.1385(12) 0.9196(12) 0.101(6) Uani 0.404(13) 1 d D U P D 2
 F35A F 0.3317(8) -0.1114(3) 0.8090(4) 0.062(3) Uani 0.404(13) 1 d D U P D 2
 F36A F 0.2427(5) -0.1292(5) 0.8623(6) 0.058(2) Uani 0.404(13) 1 d D U P D 2
 C80A C 0.3265(9) -0.0954(10) 0.8813(9) 0.0336(16) Uani 0.404(13) 1 d D U P D
 2

loop_
  _atom_site_aniso_label
  _atom_site_aniso_U_11
  _atom_site_aniso_U_22
  _atom_site_aniso_U_33
  _atom_site_aniso_U_23
  _atom_site_aniso_U_13
  _atom_site_aniso_U_12
 F10 0.0231(9) 0.0781(15) 0.0457(12) 0.0178(11) 0.0072(9) 0.0111(9)
 F20 0.0370(10) 0.0498(12) 0.0266(10) 0.0081(9) -0.0057(8) -0.0020(9)
 F39 0.0263(10) 0.0655(14) 0.0827(16) 0.0455(13) -0.0005(10) 0.0036(9)
 F21 0.0334(10) 0.0355(11) 0.0486(12) 0.0008(9) 0.0068(9) -0.0023(8)
 F19 0.0356(10) 0.0748(15) 0.0355(11) 0.0070(10) 0.0099(9) -0.0255(10)
 F37 0.0212(9) 0.0832(16) 0.0710(15) 0.0384(13) 0.0049(10) -0.0074(10)
 F11 0.0354(11) 0.0894(16) 0.0372(11) 0.0197(11) 0.0168(9) 0.0170(10)
 F30 0.0267(10) 0.0905(17) 0.0369(11) 0.0212(11) 0.0014(8) -0.0110(10)
 F40 0.0387(11) 0.0758(15) 0.0623(14) 0.0104(12) 0.0322(11) 0.0079(11)
 F28 0.0447(12) 0.121(2) 0.0284(11) 0.0266(12) 0.0120(9) -0.0011(13)
 F7 0.0367(11) 0.0678(15) 0.0453(12) -0.0106(11) 0.0023(10) -0.0140(10)
 F29 0.0652(15) 0.0589(15) 0.0472(13) 0.0190(11) -0.0173(11) 0.0053(12)
 F8 0.0755(16) 0.0621(15) 0.0395(12) -0.0094(11) 0.0028(11) 0.0210(13)
 F17 0.0574(14) 0.0495(13) 0.0586(14) 0.0025(11) 0.0171(12) -0.0013(11)
 F12 0.0595(14) 0.0455(13) 0.111(2) 0.0252(13) 0.0498(14) 0.0193(11)
 F41 0.0664(15) 0.0906(18) 0.0776(17) 0.0368(15) 0.0464(14) 0.0518(14)
 F27 0.106(2) 0.0515(14) 0.0604(15) 0.0264(12) 0.0439(14) 0.0048(13)
 F9 0.0939(19) 0.100(2) 0.0229(11) 0.0028(12) 0.0189(12) -0.0321(15)
 F42 0.0415(12) 0.0684(15) 0.0681(16) -0.0265(13) 0.0246(11) 0.0000(11)
 N1 0.0224(12) 0.0353(14) 0.0209(12) 0.0118(10) 0.0106(10) 0.0017(10)
 F18 0.118(2) 0.0455(14) 0.0923(19) 0.0353(14) 0.0564(18) 0.0067(14)
 F3 0.0399(12) 0.110(2) 0.104(2) 0.0522(17) 0.0454(14) 0.0174(13)
 F2 0.0700(16) 0.119(2) 0.0768(18) 0.0570(17) 0.0459(14) 0.0547(16)
 F25 0.123(2) 0.0429(13) 0.0490(14) 0.0045(11) 0.0159(14) -0.0391(14)
 F38 0.0422(13) 0.129(2) 0.0449(14) -0.0422(15) -0.0162(11) 0.0332(14)
 F13 0.098(2) 0.138(3) 0.0745(19) 0.077(2) 0.0031(17) 0.007(2)
 F44 0.0627(16) 0.095(2) 0.075(2) 0.0007(16) 0.0030(14) 0.0458(15)
 F45 0.0642(17) 0.0798(19) 0.101(2) -0.0351(17) -0.0055(15) 0.0365(15)
 F16 0.0953(19) 0.0566(15) 0.097(2) 0.0258(14) 0.0619(17) 0.0180(13)
 F43 0.0286(13) 0.120(3) 0.112(2) -0.024(2) 0.0102(14) 0.0152(14)
 F1 0.0455(14) 0.0561(16) 0.154(3) -0.0264(18) 0.0194(16) 0.0067(12)
 F26 0.0701(17) 0.0520(15) 0.217(4) 0.069(2) 0.074(2) 0.0259(13)
 C60 0.0165(13) 0.0349(16) 0.0181(13) 0.0102(12) 0.0060(11) -0.0013(11)
 C14 0.0172(13) 0.0312(16) 0.0177(13) 0.0060(12) 0.0009(11) -0.0017(11)
 C56 0.0192(13) 0.0347(17) 0.0220(14) 0.0073(13) 0.0061(12) 0.0001(12)
 C15 0.0180(13) 0.0343(16) 0.0168(13) 0.0084(12) 0.0038(11) -0.0048(11)
 C82 0.0196(13) 0.0367(16) 0.0193(14) 0.0132(12) 0.0068(11) -0.0008(12)
 C40 0.0224(14) 0.0349(16) 0.0245(15) 0.0123(13) 0.0077(12) -0.0004(12)
 C30 0.0208(13) 0.0314(15) 0.0194(14) 0.0129(12) 0.0053(11) -0.0016(11)
 C39 0.0198(13) 0.0386(17) 0.0170(13) 0.0101(12) 0.0044(11) 0.0010(12)
 C65 0.0162(13) 0.0348(16) 0.0192(14) 0.0086(12) 0.0049(11) -0.0019(11)
 C74 0.0196(13) 0.0356(17) 0.0210(14) 0.0112(13) 0.0054(11) -0.0009(12)
 C17 0.0208(13) 0.0289(15) 0.0195(14) 0.0083(12) 0.0086(11) -0.0019(11)
 C64 0.0192(13) 0.0323(16) 0.0211(14) 0.0092(12) 0.0079(11) 0.0001(11)
 C57 0.0202(13) 0.0317(16) 0.0235(14) 0.0098(12) 0.0077(12) -0.0003(11)
 C35 0.0278(15) 0.0332(16) 0.0214(14) 0.0109(13) 0.0076(12) 0.0006(12)
 C66 0.0221(14) 0.0302(15) 0.0194(14) 0.0062(12) 0.0093(11) -0.0004(11)
 C95 0.0227(15) 0.0371(18) 0.0289(16) 0.0014(14) 0.0051(13) 0.0009(13)
 C20 0.0235(14) 0.0291(15) 0.0205(14) 0.0046(12) 0.0091(12) -0.0015(11)
 C92 0.0203(14) 0.0303(16) 0.0257(15) 0.0053(13) 0.0056(12) -0.0001(12)
 C31 0.0239(14) 0.0310(16) 0.0188(14) 0.0095(12) 0.0054(11) -0.0020(12)
 C83 0.0179(13) 0.0354(16) 0.0219(14) 0.0116(12) 0.0098(11) 0.0018(11)
 C52 0.0171(13) 0.0315(15) 0.0209(14) 0.0091(12) 0.0083(11) 0.0010(11)
 C22 0.0268(15) 0.0355(17) 0.0192(14) 0.0027(12) 0.0109(12) -0.0033(12)
 C16 0.0216(13) 0.0284(15) 0.0177(13) 0.0077(12) 0.0073(11) -0.0012(11)
 C62 0.0205(13) 0.0295(15) 0.0188(13) 0.0079(12) 0.0076(11) 0.0012(11)
 C93 0.0178(13) 0.0297(15) 0.0246(15) 0.0075(12) 0.0074(12) 0.0027(11)
 C8 0.0181(13) 0.0354(16) 0.0179(13) 0.0081(12) 0.0076(11) -0.0019(11)
 C67 0.0274(15) 0.0334(16) 0.0245(15) 0.0079(13) 0.0112(12) -0.0009(12)
 C9 0.0161(13) 0.0336(16) 0.0177(13) 0.0078(12) 0.0007(11) -0.0015(11)
 C34 0.0272(15) 0.0374(17) 0.0215(15) 0.0104(13) 0.0042(12) -0.0041(13)
 C21 0.0187(13) 0.0334(16) 0.0203(14) 0.0065(12) 0.0066(11) -0.0022(11)
 C63 0.0224(14) 0.0347(16) 0.0157(13) 0.0098(12) 0.0061(11) 0.0022(12)
 C54 0.0313(16) 0.0360(17) 0.0275(16) 0.0139(14) 0.0100(13) 0.0025(13)
 C42 0.0174(13) 0.0320(16) 0.0197(14) 0.0071(12) 0.0072(11) 0.0000(11)
 C87 0.0227(14) 0.0331(16) 0.0175(13) 0.0075(12) 0.0060(11) -0.0025(12)
 C27 0.0256(15) 0.0392(17) 0.0206(14) 0.0026(13) 0.0097(12) -0.0050(13)
 C84 0.0191(13) 0.0291(15) 0.0200(14) 0.0097(12) 0.0052(11) 0.0006(11)
 C18 0.0229(14) 0.0281(15) 0.0194(14) 0.0087(12) 0.0070(11) 0.0005(11)
 C61 0.0174(13) 0.0344(16) 0.0195(14) 0.0125(12) 0.0052(11) -0.0021(11)
 C32 0.0218(14) 0.0382(17) 0.0277(16) 0.0165(14) 0.0056(12) 0.0018(12)
 C89 0.0166(13) 0.0370(17) 0.0340(17) 0.0107(14) 0.0078(12) 0.0025(12)
 C38 0.0184(13) 0.0331(16) 0.0163(13) 0.0053(12) 0.0072(11) -0.0030(11)
 C70 0.0266(15) 0.0392(18) 0.0204(14) 0.0030(13) 0.0091(12) -0.0026(13)
 C88 0.0198(13) 0.0290(15) 0.0223(14) 0.0093(12) 0.0066(11) 0.0001(11)
 F15 0.092(2) 0.214(4) 0.086(2) 0.092(3) 0.0310(18) -0.022(2)
 C36 0.0278(16) 0.045(2) 0.0390(19) 0.0141(16) 0.0100(14) 0.0046(14)
 C55 0.0252(15) 0.0413(18) 0.0220(15) 0.0111(13) 0.0056(12) 0.0033(13)
 C13 0.0271(15) 0.0364(17) 0.0280(16) 0.0130(14) 0.0067(13) -0.0024(13)
 C53 0.0248(14) 0.0314(16) 0.0219(14) 0.0070(12) 0.0064(12) -0.0025(12)
 C69 0.0280(15) 0.0344(17) 0.0282(16) -0.0022(13) 0.0127(13) -0.0063(13)
 C41 0.0181(13) 0.0316(16) 0.0231(14) 0.0074(12) 0.0061(11) -0.0038(11)
 C23 0.0366(17) 0.0422(19) 0.0286(16) 0.0100(14) 0.0152(14) -0.0022(14)
 C37 0.0337(18) 0.050(2) 0.0292(18) 0.0069(16) 0.0030(14) -0.0012(16)
 F14 0.201(4) 0.105(3) 0.0464(16) 0.0384(17) 0.038(2) -0.025(3)
 C43 0.0179(13) 0.0316(15) 0.0206(14) 0.0094(12) 0.0086(11) -0.0010(11)
 C86 0.0209(14) 0.0355(17) 0.0242(15) 0.0094(13) 0.0080(12) 0.0003(12)
 F5 0.246(13) 0.033(3) 0.098(5) 0.027(3) 0.135(7) 0.022(4)
 C75 0.0237(14) 0.0376(17) 0.0196(14) 0.0122(13) 0.0051(12) -0.0003(12)
 C58 0.0244(15) 0.0412(18) 0.0214(15) 0.0072(13) 0.0036(12) -0.0010(13)
 C68 0.0316(16) 0.0302(16) 0.0319(16) 0.0045(13) 0.0174(14) -0.0017(13)
 C24 0.049(2) 0.049(2) 0.0309(17) 0.0126(16) 0.0216(16) -0.0066(16)
 C19 0.0249(14) 0.0320(16) 0.0155(13) 0.0074(12) 0.0071(11) 0.0005(12)
 C90 0.0250(15) 0.0320(17) 0.0344(17) 0.0022(14) 0.0125(13) -0.0001(12)
 C33 0.0228(14) 0.0411(18) 0.0264(16) 0.0163(14) 0.0001(12) -0.0032(13)
 C1 0.0280(15) 0.0285(16) 0.0293(16) 0.0046(13) 0.0084(13) 0.0000(12)
 F6 0.132(6) 0.050(3) 0.065(4) 0.032(3) 0.075(5) 0.021(3)
 C44 0.0205(14) 0.0416(18) 0.0351(17) 0.0203(15) 0.0066(13) -0.0004(13)
 C85 0.0181(13) 0.0337(16) 0.0220(14) 0.0078(12) 0.0043(11) 0.0001(12)
 C29 0.0261(16) 0.053(2) 0.047(2) 0.0061(18) 0.0194(15) 0.0001(15)
 C71 0.0262(14) 0.0334(16) 0.0178(14) 0.0053(12) 0.0077(12) -0.0013(12)
 C10 0.0228(14) 0.0407(18) 0.0344(17) 0.0122(14) 0.0091(13) 0.0026(13)
 C72 0.0334(17) 0.050(2) 0.0255(17) 0.0066(15) 0.0047(14) -0.0071(15)
 C26 0.0289(16) 0.0410(18) 0.0231(15) -0.0035(13) 0.0122(13) -0.0067(13)
 F22 0.080(4) 0.040(3) 0.038(3) 0.026(2) -0.004(3) 0.009(3)
 F46A 0.077(2) 0.127(3) 0.0342(16) 0.0201(18) 0.0315(17) 0.011(2)
 C76 0.0323(16) 0.0352(17) 0.0288(16) 0.0152(14) 0.0071(13) 0.0005(13)
 C91 0.0250(15) 0.0343(17) 0.0268(16) -0.0015(13) 0.0070(13) -0.0012(13)
 C79 0.053(2) 0.0371(18) 0.0341(18) 0.0131(15) 0.0251(16) 0.0034(15)
 C12 0.0325(17) 0.0330(17) 0.0378(18) 0.0120(15) 0.0049(14) 0.0034(14)
 C45 0.0296(16) 0.0418(19) 0.0390(18) 0.0226(16) 0.0057(14) 0.0026(14)
 C25 0.0350(18) 0.051(2) 0.0313(17) 0.0020(15) 0.0203(15) -0.0082(15)
 C73 0.0387(19) 0.0329(18) 0.047(2) 0.0057(16) 0.0180(16) -0.0050(15)
 C11 0.0255(16) 0.0404(19) 0.0430(19) 0.0094(16) 0.0091(14) 0.0084(14)
 C96 0.0206(14) 0.0383(18) 0.0279(16) -0.0029(13) 0.0078(12) -0.0050(12)
 C59 0.057(2) 0.039(2) 0.0389(19) 0.0180(17) 0.0008(17) 0.0009(17)
 C98 0.0270(17) 0.053(2) 0.053(2) -0.0172(19) 0.0109(16) 0.0015(16)
 C94 0.0243(16) 0.049(2) 0.047(2) -0.0012(18) 0.0125(15) 0.0022(15)
 C101 0.0278(16) 0.0398(18) 0.0326(17) -0.0028(14) 0.0143(14) -0.0096(13)
 F48A 0.132(4) 0.086(2) 0.0457(17) -0.0153(16) 0.039(3) 0.017(3)
 C48 0.041(2) 0.070(3) 0.050(2) 0.041(2) 0.0066(17) -0.0060(18)
 C97 0.0247(16) 0.050(2) 0.0330(18) -0.0061(16) 0.0047(14) 0.0027(14)
 F47A 0.105(3) 0.158(5) 0.059(2) 0.009(3) 0.039(2) -0.077(3)
 C49 0.0374(18) 0.053(2) 0.0383(19) 0.0247(17) 0.0079(15) -0.0065(16)
 C99 0.0355(19) 0.051(2) 0.056(2) -0.0197(19) 0.0256(18) -0.0068(17)
 C77 0.053(2) 0.042(2) 0.043(2) 0.0219(16) 0.0242(17) 0.0013(16)
 C103 0.037(2) 0.073(3) 0.067(3) -0.022(3) 0.004(2) 0.017(2)
 C2 0.0407(18) 0.046(2) 0.0368(18) 0.0153(16) 0.0172(15) 0.0074(15)
 C100 0.0363(18) 0.046(2) 0.042(2) -0.0089(16) 0.0238(16) -0.0127(15)
 C80 0.030(4) 0.035(3) 0.036(2) 0.0189(19) 0.009(3) 0.016(3)
 C46 0.0362(18) 0.041(2) 0.052(2) 0.0265(17) 0.0111(16) 0.0013(15)
 C78 0.072(3) 0.046(2) 0.042(2) 0.0189(17) 0.0364(19) 0.0055(18)
 C47 0.041(2) 0.060(2) 0.066(3) 0.045(2) 0.0100(19) -0.0023(18)
 C3 0.0376(18) 0.046(2) 0.0362(18) 0.0136(16) 0.0142(15) 0.0058(15)
 C102 0.060(2) 0.067(3) 0.045(2) -0.0100(19) 0.036(2) -0.0209(19)
 C28 0.069(3) 0.074(3) 0.059(2) 0.038(2) 0.040(2) 0.010(2)
 C4 0.045(2) 0.042(2) 0.043(2) 0.0089(16) 0.0211(16) 0.0088(16)
 C50 0.079(3) 0.093(4) 0.061(3) 0.052(3) 0.015(2) -0.021(3)
 C6 0.061(2) 0.046(2) 0.051(2) 0.0251(18) 0.0252(19) 0.0114(18)
 C7 0.060(2) 0.047(2) 0.055(2) 0.0192(19) 0.017(2) -0.0041(19)
 C81 0.120(5) 0.055(3) 0.027(4) 0.018(3) 0.037(4) -0.006(4)
 C51 0.058(3) 0.047(2) 0.075(3) 0.030(2) 0.031(2) 0.0065(19)
 C5 0.062(3) 0.078(3) 0.073(3) 0.007(3) 0.021(2) 0.030(2)
 F23 0.073(4) 0.075(5) 0.166(9) 0.088(6) 0.024(4) -0.009(3)
 F24 0.238(15) 0.043(4) 0.068(5) 0.028(4) 0.081(8) 0.063(7)
 F4 0.063(4) 0.269(18) 0.124(10) 0.163(12) 0.025(4) 0.012(6)
 F22A 0.060(4) 0.062(5) 0.223(13) 0.072(7) 0.033(5) 0.026(3)
 F24A 0.083(5) 0.032(3) 0.067(4) 0.019(3) -0.011(4) -0.008(3)
 F23A 0.28(2) 0.052(5) 0.089(7) 0.041(5) 0.107(11) 0.027(9)
 F4A 0.078(4) 0.094(6) 0.070(6) 0.059(5) 0.042(4) 0.017(4)
 F5A 0.086(5) 0.143(8) 0.158(9) 0.104(6) 0.060(6) -0.013(5)
 F6A 0.28(2) 0.145(8) 0.065(6) 0.057(5) 0.106(11) 0.082(11)
 F48 0.132(4) 0.086(2) 0.0457(17) -0.0153(16) 0.039(3) 0.017(3)
 F46 0.077(2) 0.127(3) 0.0342(16) 0.0201(18) 0.0315(17) 0.011(2)
 F47 0.105(3) 0.158(5) 0.059(2) 0.009(3) 0.039(2) -0.077(3)
 F32 0.073(5) 0.074(3) 0.033(3) 0.013(2) 0.029(3) 0.001(3)
 F33 0.144(5) 0.153(5) 0.077(4) 0.029(3) 0.082(4) -0.038(4)
 F31 0.233(7) 0.113(4) 0.039(3) 0.050(3) 0.056(3) 0.085(4)
 F32A 0.073(5) 0.074(3) 0.033(3) 0.013(2) 0.029(3) 0.001(3)
 C81A 0.120(5) 0.055(3) 0.027(4) 0.018(3) 0.037(4) -0.006(4)
 F31A 0.233(7) 0.113(4) 0.039(3) 0.050(3) 0.056(3) 0.085(4)
 F33A 0.144(5) 0.153(5) 0.077(4) 0.029(3) 0.082(4) -0.038(4)
 F34A 0.043(3) 0.033(3) 0.043(3) 0.023(2) 0.007(2) 0.014(2)
 F36 0.046(3) 0.038(2) 0.060(4) -0.001(2) -0.011(3) 0.004(2)
 F35 0.098(6) 0.040(2) 0.087(4) 0.008(2) 0.068(4) 0.011(2)
 F34 0.120(9) 0.063(7) 0.069(8) 0.032(6) -0.012(6) 0.036(6)
 F35A 0.107(10) 0.033(3) 0.053(4) 0.005(3) 0.050(5) 0.006(4)
 F36A 0.056(4) 0.048(4) 0.052(4) 0.007(3) 0.013(3) -0.015(3)
 C80A 0.030(4) 0.035(3) 0.036(2) 0.0189(19) 0.009(3) 0.016(3)

_geom_special_details
;
 All esds (except the esd in the dihedral angle between two l.s. planes)
 are estimated using the full covariance matrix.  The cell esds are taken
 into account individually in the estimation of esds in distances, angles
 and torsion angles; correlations between esds in cell parameters are only
 used when they are defined by crystal symmetry.  An approximate (isotropic)
 treatment of cell esds is used for estimating esds involving l.s. planes.
;
loop_
  _geom_bond_atom_site_label_1
  _geom_bond_atom_site_label_2
  _geom_bond_distance
  _geom_bond_site_symmetry_2
  _geom_bond_publ_flag
 F10 C36 1.331(4) . ?
 F20 C58 1.333(3) . ?
 F39 C95 1.306(4) . ?
 F21 C58 1.336(4) . ?
 F19 C58 1.332(4) . ?
 F37 C95 1.336(4) . ?
 F11 C36 1.343(4) . ?
 F30 C72 1.327(4) . ?
 F40 C94 1.334(4) . ?
 F28 C72 1.324(4) . ?
 F7 C37 1.328(4) . ?
 F29 C72 1.330(4) . ?
 F8 C37 1.332(4) . ?
 F17 C51 1.305(5) . ?
 F12 C36 1.329(4) . ?
 F41 C94 1.333(4) . ?
 F27 C73 1.322(4) . ?
 F9 C37 1.309(4) . ?
 F42 C94 1.326(4) . ?
 N1 C15 1.472(4) . ?
 N1 C8 1.473(3) . ?
 N1 C1 1.424(4) . ?
 F18 C51 1.319(4) . ?
 F3 C29 1.325(4) . ?
 F2 C29 1.315(4) . ?
 F25 C73 1.315(4) . ?
 F38 C95 1.317(4) . ?
 F13 C50 1.333(6) . ?
 F44 C103 1.342(6) . ?
 F45 C103 1.330(5) . ?
 F16 C51 1.368(5) . ?
 F43 C103 1.333(6) . ?
 F1 C29 1.315(4) . ?
 F26 C73 1.319(4) . ?
 C60 C15 1.549(4) . ?
 C60 C65 1.390(4) . ?
 C60 C61 1.389(4) . ?
 C14 C15 1.520(4) . ?
 C14 C9 1.369(4) . ?
 C14 C13 1.393(4) . ?
 C56 C57 1.383(4) . ?
 C56 C55 1.389(4) . ?
 C56 C58 1.503(4) . ?
 C15 C82 1.543(4) . ?
 C82 C83 1.384(4) . ?
 C82 C87 1.386(4) . ?
 C40 C39 1.391(4) . ?
 C40 C41 1.394(4) . ?
 C40 C44 1.483(4) . ?
 C30 C35 1.393(4) . ?
 C30 C31 1.393(4) . ?
 C30 C18 1.492(4) . ?
 C39 H39 0.9500 . ?
 C39 C38 1.390(4) . ?
 C65 H65 0.9500 . ?
 C65 C64 1.397(4) . ?
 C74 C64 1.489(4) . ?
 C74 C75 1.390(4) . ?
 C74 C79 1.389(4) . ?
 C17 H17 0.9500 . ?
 C17 C16 1.386(4) . ?
 C17 C18 1.397(4) . ?
 C64 C63 1.393(4) . ?
 C57 H57 0.9500 . ?
 C57 C52 1.402(4) . ?
 C35 H35 0.9500 . ?
 C35 C34 1.399(4) . ?
 C66 C62 1.482(4) . ?
 C66 C67 1.396(4) . ?
 C66 C71 1.396(4) . ?
 C95 C92 1.502(4) . ?
 C20 C22 1.483(4) . ?
 C20 C21 1.387(4) . ?
 C20 C19 1.398(4) . ?
 C92 C93 1.387(4) . ?
 C92 C91 1.377(4) . ?
 C31 H31 0.9500 . ?
 C31 C32 1.397(4) . ?
 C83 H83 0.9500 . ?
 C83 C84 1.397(4) . ?
 C52 C42 1.488(4) . ?
 C52 C53 1.393(4) . ?
 C22 C27 1.395(4) . ?
 C22 C23 1.384(4) . ?
 C16 C8 1.552(4) . ?
 C16 C21 1.395(4) . ?
 C62 C63 1.385(4) . ?
 C62 C61 1.401(4) . ?
 C93 H93 0.9500 . ?
 C93 C88 1.398(4) . ?
 C8 C9 1.526(4) . ?
 C8 C38 1.544(4) . ?
 C67 H67 0.9500 . ?
 C67 C68 1.391(4) . ?
 C9 C10 1.390(4) . ?
 C34 C37 1.502(5) . ?
 C34 C33 1.381(5) . ?
 C21 H21 0.9500 . ?
 C63 H63 0.9500 . ?
 C54 C55 1.385(4) . ?
 C54 C53 1.386(4) . ?
 C54 C59 1.495(5) . ?
 C42 C41 1.394(4) . ?
 C42 C43 1.406(4) . ?
 C87 H87 0.9500 . ?
 C87 C86 1.396(4) . ?
 C27 H27 0.9500 . ?
 C27 C26 1.384(4) . ?
 C84 C88 1.492(4) . ?
 C84 C85 1.401(4) . ?
 C18 C19 1.391(4) . ?
 C61 H61 0.9500 . ?
 C32 C36 1.494(5) . ?
 C32 C33 1.385(4) . ?
 C89 H89 0.9500 . ?
 C89 C88 1.402(4) . ?
 C89 C90 1.383(4) . ?
 C38 C43 1.388(4) . ?
 C70 C69 1.386(4) . ?
 C70 C71 1.385(4) . ?
 C70 C72 1.503(4) . ?
 F15 C50 1.319(5) . ?
 C55 H55 0.9500 . ?
 C13 H13 0.9500 . ?
 C13 C12 1.382(5) . ?
 C53 H53 0.9500 . ?
 C69 H69 0.9500 . ?
 C69 C68 1.393(4) . ?
 C41 H41 0.9500 . ?
 C23 H23 0.9500 . ?
 C23 C24 1.394(4) . ?
 F14 C50 1.303(6) . ?
 C43 H43 0.9500 . ?
 C86 C85 1.386(4) . ?
 C86 C96 1.491(4) . ?
 F5 C28 1.203(10) . ?
 C75 H75 0.9500 . ?
 C75 C76 1.380(4) . ?
 C68 C73 1.495(5) . ?
 C24 C25 1.383(5) . ?
 C24 C28 1.493(5) . ?
 C19 H19 0.9500 . ?
 C90 C91 1.389(4) . ?
 C90 C94 1.502(4) . ?
 C33 H33 0.9500 . ?
 C1 H1 1.0000 . ?
 C1 C2 1.488(5) . ?
 C1 C3 1.504(4) . ?
 F6 C28 1.398(9) . ?
 C44 C45 1.389(5) . ?
 C44 C49 1.397(4) . ?
 C85 H85 0.9500 . ?
 C29 C26 1.498(5) . ?
 C71 H71 0.9500 . ?
 C10 H10 0.9500 . ?
 C10 C11 1.382(5) . ?
 C26 C25 1.376(5) . ?
 F22 C59 1.298(7) . ?
 F46A C102 1.375(5) . ?
 C76 C77 1.379(5) . ?
 C76 C80 1.563(11) . ?
 C76 C80A 1.411(18) . ?
 C91 H91 0.9500 . ?
 C79 H79 0.9500 . ?
 C79 C78 1.391(5) . ?
 C12 H12 0.9500 . ?
 C12 C11 1.392(5) . ?
 C45 H45 0.9500 . ?
 C45 C46 1.387(5) . ?
 C25 H25 0.9500 . ?
 C11 H11 0.9500 . ?
 C96 C101 1.395(4) . ?
 C96 C97 1.393(5) . ?
 C59 F23 1.393(7) . ?
 C59 F24 1.213(7) . ?
 C59 F22A 1.416(8) . ?
 C59 F24A 1.317(7) . ?
 C59 F23A 1.250(8) . ?
 C98 C97 1.394(5) . ?
 C98 C99 1.379(6) . ?
 C98 C103 1.496(6) . ?
 C101 H101 0.9500 . ?
 C101 C100 1.387(5) . ?
 F48A C102 1.326(5) . ?
 C48 C49 1.389(5) . ?
 C48 C47 1.390(6) . ?
 C48 C50 1.493(6) . ?
 C97 H97 0.9500 . ?
 F47A C102 1.318(5) . ?
 C49 H49 0.9500 . ?
 C99 H99 0.9500 . ?
 C99 C100 1.381(6) . ?
 C77 H77 0.9500 . ?
 C77 C78 1.388(5) . ?
 C2 H2 1.0000 . ?
 C2 C3 1.520(5) . ?
 C2 C6 1.520(5) . ?
 C100 C102 1.492(5) . ?
 C80 F34A 1.327(9) . ?
 C80 F36 1.329(9) . ?
 C80 F35 1.326(9) . ?
 C46 C47 1.383(5) . ?
 C46 C51 1.509(6) . ?
 C78 C81 1.571(7) . ?
 C78 C81A 1.34(2) . ?
 C47 H47 0.9500 . ?
 C3 H3 1.0000 . ?
 C3 C4 1.511(5) . ?
 C102 F48 1.264(9) . ?
 C102 F46 1.279(8) . ?
 C102 F47 1.334(9) . ?
 C28 F4 1.340(9) . ?
 C28 F4A 1.410(8) . ?
 C28 F5A 1.370(12) . ?
 C28 F6A 1.176(11) . ?
 C4 H4A 0.9900 . ?
 C4 H4B 0.9900 . ?
 C4 C5 1.538(6) . ?
 C6 H6A 0.9900 . ?
 C6 H6B 0.9900 . ?
 C6 C7 1.534(5) . ?
 C7 H7A 0.9800 . ?
 C7 H7B 0.9800 . ?
 C7 H7C 0.9800 . ?
 C81 F32 1.293(9) . ?
 C81 F33 1.359(9) . ?
 C81 F31 1.337(9) . ?
 C5 H5A 0.9800 . ?
 C5 H5B 0.9800 . ?
 C5 H5C 0.9800 . ?
 F32A C81A 1.287(17) . ?
 C81A F31A 1.349(16) . ?
 C81A F33A 1.337(17) . ?
 F34 C80A 1.290(14) . ?
 F35A C80A 1.322(14) . ?
 F36A C80A 1.331(13) . ?

loop_
  _geom_angle_atom_site_label_1
  _geom_angle_atom_site_label_2
  _geom_angle_atom_site_label_3
  _geom_angle
  _geom_angle_site_symmetry_1
  _geom_angle_site_symmetry_3
  _geom_angle_publ_flag
 C15 N1 C8 115.0(2) . . ?
 C1 N1 C15 119.0(2) . . ?
 C1 N1 C8 124.4(2) . . ?
 C65 C60 C15 118.6(2) . . ?
 C61 C60 C15 122.1(2) . . ?
 C61 C60 C65 118.7(2) . . ?
 C9 C14 C15 111.0(2) . . ?
 C9 C14 C13 121.0(3) . . ?
 C13 C14 C15 128.0(3) . . ?
 C57 C56 C55 120.9(3) . . ?
 C57 C56 C58 118.6(3) . . ?
 C55 C56 C58 120.4(3) . . ?
 N1 C15 C60 115.2(2) . . ?
 N1 C15 C14 101.1(2) . . ?
 N1 C15 C82 108.3(2) . . ?
 C14 C15 C60 107.2(2) . . ?
 C14 C15 C82 113.9(2) . . ?
 C82 C15 C60 111.0(2) . . ?
 C83 C82 C15 120.1(2) . . ?
 C83 C82 C87 118.7(2) . . ?
 C87 C82 C15 120.9(2) . . ?
 C39 C40 C41 118.9(3) . . ?
 C39 C40 C44 120.9(3) . . ?
 C41 C40 C44 120.2(3) . . ?
 C35 C30 C18 120.9(3) . . ?
 C31 C30 C35 118.7(3) . . ?
 C31 C30 C18 120.3(2) . . ?
 C40 C39 H39 119.3 . . ?
 C38 C39 C40 121.4(3) . . ?
 C38 C39 H39 119.3 . . ?
 C60 C65 H65 119.3 . . ?
 C60 C65 C64 121.3(2) . . ?
 C64 C65 H65 119.3 . . ?
 C75 C74 C64 119.8(3) . . ?
 C79 C74 C64 122.1(3) . . ?
 C79 C74 C75 118.0(3) . . ?
 C16 C17 H17 119.3 . . ?
 C16 C17 C18 121.5(2) . . ?
 C18 C17 H17 119.3 . . ?
 C65 C64 C74 120.0(2) . . ?
 C63 C64 C65 118.8(2) . . ?
 C63 C64 C74 121.1(2) . . ?
 C56 C57 H57 119.4 . . ?
 C56 C57 C52 121.3(3) . . ?
 C52 C57 H57 119.4 . . ?
 C30 C35 H35 119.9 . . ?
 C30 C35 C34 120.3(3) . . ?
 C34 C35 H35 119.9 . . ?
 C67 C66 C62 121.1(2) . . ?
 C71 C66 C62 120.4(3) . . ?
 C71 C66 C67 118.5(3) . . ?
 F39 C95 F37 104.9(3) . . ?
 F39 C95 F38 109.3(3) . . ?
 F39 C95 C92 112.7(3) . . ?
 F37 C95 C92 111.4(3) . . ?
 F38 C95 F37 104.8(3) . . ?
 F38 C95 C92 113.2(3) . . ?
 C21 C20 C22 119.6(2) . . ?
 C21 C20 C19 119.5(2) . . ?
 C19 C20 C22 120.9(2) . . ?
 C93 C92 C95 118.6(3) . . ?
 C91 C92 C95 119.6(3) . . ?
 C91 C92 C93 121.8(3) . . ?
 C30 C31 H31 119.7 . . ?
 C30 C31 C32 120.5(3) . . ?
 C32 C31 H31 119.7 . . ?
 C82 C83 H83 119.0 . . ?
 C82 C83 C84 122.0(3) . . ?
 C84 C83 H83 119.0 . . ?
 C57 C52 C42 121.3(2) . . ?
 C53 C52 C57 117.2(2) . . ?
 C53 C52 C42 121.5(2) . . ?
 C27 C22 C20 120.9(3) . . ?
 C23 C22 C20 120.6(3) . . ?
 C23 C22 C27 118.4(3) . . ?
 C17 C16 C8 121.6(2) . . ?
 C17 C16 C21 118.6(2) . . ?
 C21 C16 C8 119.5(2) . . ?
 C63 C62 C66 120.7(2) . . ?
 C63 C62 C61 119.1(2) . . ?
 C61 C62 C66 120.1(2) . . ?
 C92 C93 H93 119.5 . . ?
 C92 C93 C88 120.9(3) . . ?
 C88 C93 H93 119.5 . . ?
 N1 C8 C16 113.1(2) . . ?
 N1 C8 C9 100.5(2) . . ?
 N1 C8 C38 112.3(2) . . ?
 C9 C8 C16 105.3(2) . . ?
 C9 C8 C38 114.0(2) . . ?
 C38 C8 C16 111.1(2) . . ?
 C66 C67 H67 119.8 . . ?
 C68 C67 C66 120.4(3) . . ?
 C68 C67 H67 119.8 . . ?
 C14 C9 C8 111.7(2) . . ?
 C14 C9 C10 120.1(3) . . ?
 C10 C9 C8 128.0(3) . . ?
 C35 C34 C37 118.8(3) . . ?
 C33 C34 C35 120.8(3) . . ?
 C33 C34 C37 120.5(3) . . ?
 C20 C21 C16 121.1(2) . . ?
 C20 C21 H21 119.5 . . ?
 C16 C21 H21 119.5 . . ?
 C64 C63 H63 119.5 . . ?
 C62 C63 C64 120.9(2) . . ?
 C62 C63 H63 119.5 . . ?
 C55 C54 C53 121.1(3) . . ?
 C55 C54 C59 119.5(3) . . ?
 C53 C54 C59 119.3(3) . . ?
 C41 C42 C52 120.8(2) . . ?
 C41 C42 C43 117.9(2) . . ?
 C43 C42 C52 121.3(2) . . ?
 C82 C87 H87 119.5 . . ?
 C82 C87 C86 121.0(3) . . ?
 C86 C87 H87 119.5 . . ?
 C22 C27 H27 119.5 . . ?
 C26 C27 C22 121.0(3) . . ?
 C26 C27 H27 119.5 . . ?
 C83 C84 C88 119.9(2) . . ?
 C83 C84 C85 118.0(3) . . ?
 C85 C84 C88 122.1(2) . . ?
 C17 C18 C30 120.2(2) . . ?
 C19 C18 C30 120.7(2) . . ?
 C19 C18 C17 119.1(2) . . ?
 C60 C61 C62 121.1(2) . . ?
 C60 C61 H61 119.5 . . ?
 C62 C61 H61 119.5 . . ?
 C31 C32 C36 118.3(3) . . ?
 C33 C32 C31 120.5(3) . . ?
 C33 C32 C36 121.2(3) . . ?
 C88 C89 H89 119.1 . . ?
 C90 C89 H89 119.1 . . ?
 C90 C89 C88 121.8(3) . . ?
 C39 C38 C8 121.2(2) . . ?
 C43 C38 C39 118.6(2) . . ?
 C43 C38 C8 120.2(2) . . ?
 C69 C70 C72 119.8(3) . . ?
 C71 C70 C69 120.7(3) . . ?
 C71 C70 C72 119.5(3) . . ?
 C93 C88 C84 122.2(3) . . ?
 C93 C88 C89 116.7(3) . . ?
 C89 C88 C84 121.1(2) . . ?
 F10 C36 F11 106.2(3) . . ?
 F10 C36 C32 113.2(3) . . ?
 F11 C36 C32 111.4(3) . . ?
 F12 C36 F10 107.0(3) . . ?
 F12 C36 F11 106.4(3) . . ?
 F12 C36 C32 112.1(3) . . ?
 C56 C55 H55 120.9 . . ?
 C54 C55 C56 118.2(3) . . ?
 C54 C55 H55 120.9 . . ?
 C14 C13 H13 120.6 . . ?
 C12 C13 C14 118.9(3) . . ?
 C12 C13 H13 120.6 . . ?
 C52 C53 H53 119.4 . . ?
 C54 C53 C52 121.2(3) . . ?
 C54 C53 H53 119.4 . . ?
 C70 C69 H69 120.6 . . ?
 C70 C69 C68 118.9(3) . . ?
 C68 C69 H69 120.6 . . ?
 C40 C41 H41 119.3 . . ?
 C42 C41 C40 121.5(3) . . ?
 C42 C41 H41 119.3 . . ?
 C22 C23 H23 119.9 . . ?
 C22 C23 C24 120.2(3) . . ?
 C24 C23 H23 119.9 . . ?
 F7 C37 F8 106.5(3) . . ?
 F7 C37 C34 112.4(3) . . ?
 F8 C37 C34 111.2(3) . . ?
 F9 C37 F7 106.6(3) . . ?
 F9 C37 F8 107.5(3) . . ?
 F9 C37 C34 112.4(3) . . ?
 C42 C43 H43 119.1 . . ?
 C38 C43 C42 121.7(3) . . ?
 C38 C43 H43 119.1 . . ?
 C87 C86 C96 118.6(3) . . ?
 C85 C86 C87 119.4(3) . . ?
 C85 C86 C96 122.1(2) . . ?
 C74 C75 H75 119.3 . . ?
 C76 C75 C74 121.4(3) . . ?
 C76 C75 H75 119.3 . . ?
 F20 C58 F21 106.7(2) . . ?
 F20 C58 C56 113.1(3) . . ?
 F21 C58 C56 111.9(2) . . ?
 F19 C58 F20 106.5(2) . . ?
 F19 C58 F21 106.2(3) . . ?
 F19 C58 C56 111.9(2) . . ?
 C67 C68 C69 120.7(3) . . ?
 C67 C68 C73 118.7(3) . . ?
 C69 C68 C73 120.6(3) . . ?
 C23 C24 C28 119.2(3) . . ?
 C25 C24 C23 120.9(3) . . ?
 C25 C24 C28 119.9(3) . . ?
 C20 C19 H19 119.9 . . ?
 C18 C19 C20 120.2(2) . . ?
 C18 C19 H19 119.9 . . ?
 C89 C90 C91 120.7(3) . . ?
 C89 C90 C94 119.1(3) . . ?
 C91 C90 C94 120.1(3) . . ?
 C34 C33 C32 119.2(3) . . ?
 C34 C33 H33 120.4 . . ?
 C32 C33 H33 120.4 . . ?
 N1 C1 H1 113.6 . . ?
 N1 C1 C2 122.8(3) . . ?
 N1 C1 C3 122.3(3) . . ?
 C2 C1 H1 113.6 . . ?
 C2 C1 C3 61.1(2) . . ?
 C3 C1 H1 113.6 . . ?
 C45 C44 C40 120.7(3) . . ?
 C45 C44 C49 118.8(3) . . ?
 C49 C44 C40 120.5(3) . . ?
 C84 C85 H85 119.5 . . ?
 C86 C85 C84 120.9(3) . . ?
 C86 C85 H85 119.5 . . ?
 F3 C29 C26 113.0(3) . . ?
 F2 C29 F3 105.2(3) . . ?
 F2 C29 F1 106.6(4) . . ?
 F2 C29 C26 113.2(3) . . ?
 F1 C29 F3 106.1(3) . . ?
 F1 C29 C26 112.2(3) . . ?
 C66 C71 H71 119.6 . . ?
 C70 C71 C66 120.9(3) . . ?
 C70 C71 H71 119.6 . . ?
 C9 C10 H10 120.3 . . ?
 C11 C10 C9 119.4(3) . . ?
 C11 C10 H10 120.3 . . ?
 F30 C72 F29 106.3(3) . . ?
 F30 C72 C70 112.8(3) . . ?
 F28 C72 F30 106.2(3) . . ?
 F28 C72 F29 107.8(3) . . ?
 F28 C72 C70 111.4(3) . . ?
 F29 C72 C70 111.9(3) . . ?
 C27 C26 C29 118.9(3) . . ?
 C25 C26 C27 120.4(3) . . ?
 C25 C26 C29 120.6(3) . . ?
 C75 C76 C80 118.5(4) . . ?
 C75 C76 C80A 123.3(6) . . ?
 C77 C76 C75 120.5(3) . . ?
 C77 C76 C80 120.5(4) . . ?
 C77 C76 C80A 115.4(6) . . ?
 C92 C91 C90 118.0(3) . . ?
 C92 C91 H91 121.0 . . ?
 C90 C91 H91 121.0 . . ?
 C74 C79 H79 119.7 . . ?
 C74 C79 C78 120.5(3) . . ?
 C78 C79 H79 119.7 . . ?
 C13 C12 H12 119.8 . . ?
 C13 C12 C11 120.4(3) . . ?
 C11 C12 H12 119.8 . . ?
 C44 C45 H45 119.6 . . ?
 C46 C45 C44 120.8(3) . . ?
 C46 C45 H45 119.6 . . ?
 C24 C25 H25 120.4 . . ?
 C26 C25 C24 119.1(3) . . ?
 C26 C25 H25 120.4 . . ?
 F27 C73 C68 112.3(3) . . ?
 F25 C73 F27 105.8(3) . . ?
 F25 C73 F26 107.1(3) . . ?
 F25 C73 C68 113.4(3) . . ?
 F26 C73 F27 104.8(3) . . ?
 F26 C73 C68 112.8(3) . . ?
 C10 C11 C12 120.2(3) . . ?
 C10 C11 H11 119.9 . . ?
 C12 C11 H11 119.9 . . ?
 C101 C96 C86 119.8(3) . . ?
 C97 C96 C86 121.6(3) . . ?
 C97 C96 C101 118.6(3) . . ?
 F22 C59 C54 111.3(4) . . ?
 F22 C59 F23 102.4(6) . . ?
 F23 C59 C54 105.8(4) . . ?
 F24 C59 C54 113.1(4) . . ?
 F24 C59 F22 113.5(6) . . ?
 F24 C59 F23 109.9(7) . . ?
 F22A C59 C54 111.4(4) . . ?
 F24A C59 C54 117.3(4) . . ?
 F24A C59 F22A 98.1(6) . . ?
 F23A C59 C54 118.4(5) . . ?
 F23A C59 F22A 103.1(8) . . ?
 F23A C59 F24A 105.8(8) . . ?
 C97 C98 C103 121.1(4) . . ?
 C99 C98 C97 120.6(4) . . ?
 C99 C98 C103 118.3(4) . . ?
 F40 C94 C90 111.3(3) . . ?
 F41 C94 F40 106.2(3) . . ?
 F41 C94 C90 111.7(3) . . ?
 F42 C94 F40 105.5(3) . . ?
 F42 C94 F41 108.2(3) . . ?
 F42 C94 C90 113.4(3) . . ?
 C96 C101 H101 119.6 . . ?
 C100 C101 C96 120.8(3) . . ?
 C100 C101 H101 119.6 . . ?
 C49 C48 C47 120.4(3) . . ?
 C49 C48 C50 120.6(4) . . ?
 C47 C48 C50 119.0(3) . . ?
 C96 C97 C98 120.1(3) . . ?
 C96 C97 H97 119.9 . . ?
 C98 C97 H97 119.9 . . ?
 C44 C49 H49 119.9 . . ?
 C48 C49 C44 120.3(3) . . ?
 C48 C49 H49 119.9 . . ?
 C98 C99 H99 120.2 . . ?
 C98 C99 C100 119.6(3) . . ?
 C100 C99 H99 120.2 . . ?
 C76 C77 H77 120.6 . . ?
 C76 C77 C78 118.8(3) . . ?
 C78 C77 H77 120.6 . . ?
 F44 C103 C98 113.2(4) . . ?
 F45 C103 F44 107.9(5) . . ?
 F45 C103 F43 104.9(4) . . ?
 F45 C103 C98 112.0(3) . . ?
 F43 C103 F44 105.6(4) . . ?
 F43 C103 C98 112.6(5) . . ?
 C1 C2 H2 113.9 . . ?
 C1 C2 C3 60.0(2) . . ?
 C1 C2 C6 121.8(3) . . ?
 C3 C2 H2 113.9 . . ?
 C3 C2 C6 123.0(3) . . ?
 C6 C2 H2 113.9 . . ?
 C101 C100 C102 119.6(4) . . ?
 C99 C100 C101 120.3(3) . . ?
 C99 C100 C102 120.1(3) . . ?
 F34A C80 C76 111.4(8) . . ?
 F34A C80 F36 109.0(9) . . ?
 F36 C80 C76 109.6(6) . . ?
 F35 C80 C76 113.2(7) . . ?
 F35 C80 F34A 105.8(6) . . ?
 F35 C80 F36 107.6(7) . . ?
 C45 C46 C51 118.4(3) . . ?
 C47 C46 C45 120.3(3) . . ?
 C47 C46 C51 121.3(3) . . ?
 C79 C78 C81 119.8(4) . . ?
 C77 C78 C79 120.7(3) . . ?
 C77 C78 C81 119.1(4) . . ?
 C81A C78 C79 123.6(9) . . ?
 C81A C78 C77 114.2(9) . . ?
 C48 C47 H47 120.3 . . ?
 C46 C47 C48 119.4(3) . . ?
 C46 C47 H47 120.3 . . ?
 C1 C3 C2 58.9(2) . . ?
 C1 C3 H3 114.4 . . ?
 C1 C3 C4 122.8(3) . . ?
 C2 C3 H3 114.4 . . ?
 C4 C3 C2 120.8(3) . . ?
 C4 C3 H3 114.4 . . ?
 F46A C102 C100 113.4(3) . . ?
 F48A C102 F46A 100.3(4) . . ?
 F48A C102 C100 114.4(4) . . ?
 F47A C102 F46A 103.2(5) . . ?
 F47A C102 F48A 108.3(4) . . ?
 F47A C102 C100 115.6(3) . . ?
 F48 C102 C100 108.8(8) . . ?
 F48 C102 F46 120.6(10) . . ?
 F48 C102 F47 106.3(9) . . ?
 F46 C102 C100 108.9(5) . . ?
 F46 C102 F47 106.0(9) . . ?
 F47 C102 C100 105.1(7) . . ?
 F5 C28 C24 110.6(6) . . ?
 F5 C28 F6 104.2(6) . . ?
 F5 C28 F4 117.7(10) . . ?
 F6 C28 C24 110.2(5) . . ?
 F4 C28 C24 113.3(5) . . ?
 F4 C28 F6 99.7(8) . . ?
 F4A C28 C24 110.6(4) . . ?
 F5A C28 C24 115.5(7) . . ?
 F5A C28 F4A 92.8(7) . . ?
 F6A C28 C24 118.9(7) . . ?
 F6A C28 F4A 106.3(9) . . ?
 F6A C28 F5A 109.3(10) . . ?
 C3 C4 H4A 109.6 . . ?
 C3 C4 H4B 109.6 . . ?
 C3 C4 C5 110.4(3) . . ?
 H4A C4 H4B 108.1 . . ?
 C5 C4 H4A 109.6 . . ?
 C5 C4 H4B 109.6 . . ?
 F13 C50 C48 111.8(5) . . ?
 F15 C50 F13 104.0(4) . . ?
 F15 C50 C48 112.5(4) . . ?
 F14 C50 F13 103.7(4) . . ?
 F14 C50 F15 109.6(5) . . ?
 F14 C50 C48 114.4(3) . . ?
 C2 C6 H6A 108.0 . . ?
 C2 C6 H6B 108.0 . . ?
 C2 C6 C7 117.2(3) . . ?
 H6A C6 H6B 107.3 . . ?
 C7 C6 H6A 108.0 . . ?
 C7 C6 H6B 108.0 . . ?
 C6 C7 H7A 109.5 . . ?
 C6 C7 H7B 109.5 . . ?
 C6 C7 H7C 109.5 . . ?
 H7A C7 H7B 109.5 . . ?
 H7A C7 H7C 109.5 . . ?
 H7B C7 H7C 109.5 . . ?
 F32 C81 C78 112.7(7) . . ?
 F32 C81 F33 110.9(7) . . ?
 F32 C81 F31 102.8(7) . . ?
 F33 C81 C78 106.9(5) . . ?
 F31 C81 C78 111.1(6) . . ?
 F31 C81 F33 112.5(6) . . ?
 F17 C51 F18 110.5(3) . . ?
 F17 C51 F16 103.6(3) . . ?
 F17 C51 C46 112.3(3) . . ?
 F18 C51 F16 105.9(3) . . ?
 F18 C51 C46 111.8(4) . . ?
 F16 C51 C46 112.2(3) . . ?
 C4 C5 H5A 109.5 . . ?
 C4 C5 H5B 109.5 . . ?
 C4 C5 H5C 109.5 . . ?
 H5A C5 H5B 109.5 . . ?
 H5A C5 H5C 109.5 . . ?
 H5B C5 H5C 109.5 . . ?
 C78 C81A F31A 117.5(16) . . ?
 F32A C81A C78 119.5(19) . . ?
 F32A C81A F31A 105.7(19) . . ?
 F32A C81A F33A 87.0(16) . . ?
 F33A C81A C78 120.5(13) . . ?
 F33A C81A F31A 101.5(17) . . ?
 F34 C80A C76 110.6(14) . . ?
 F34 C80A F35A 106.7(14) . . ?
 F34 C80A F36A 98.9(14) . . ?
 F35A C80A C76 113.5(11) . . ?
 F35A C80A F36A 105.6(12) . . ?
 F36A C80A C76 119.9(10) . . ?

_shelx_res_file
;
TITL GB_RJ_RN_112917_0m_a.res in P-1
    gb_rj_rn_112917_0m_a_sq.res
    created by SHELXL-2016/6 at 12:25:29 on 04-Dec-2017
REM Old TITL GB_RJ_RN_112917_0m in P-1
REM SHELXT solution in P-1
REM R1 0.302, Rweak 0.017, Alpha 0.088, Orientation as input
REM Formula found by SHELXT: C150 N4
CELL 0.71073 16.0386 18.5013 18.5527 107.434 114.354 90.861
ZERR 2 0.0008 0.0012 0.0012 0.002 0.002 0.002
LATT 1
SFAC C H F N
UNIT 206 106 96 2
DFIX 1.32 F32 C81 F32A C81A F31 C81 F31A C81A F33 C81 F33A C81A
DFIX 1.32 F34 C80A F35 C80 F35A C80A F34A C80 F36A C80A F36 C80
DFIX 1.32 F22 C59 F23A C59 F22A C59 F24 C59 F24A C59 F23 C59
DFIX 1.31 0.01 F48 C102 F46A C102 F46 C102 F47A C102 F47 C102 F48A C102
RIGU F24 F24A C59 F23 F23A F22 F22A
RIGU F5A F5 C28 F4A F4 F6A F6
RIGU F46A F46 F47A F47 F48A F48 C102
RIGU C81
RIGU C80
RIGU C81 F32 F31 F33
RIGU F32A C81A F31A F33A
RIGU F34 C80A F35A F36A
RIGU F34A C80 F35 F36
EADP C81A C81
EADP C80 C80A
EADP F31 F31A
EADP F33 F33A
EADP F32A F32
EADP C81 C81A
EADP F46A F46
EADP F47A F47
EADP F48 F48A

L.S. 10 0 19
PLAN  10
SIZE 0.1 0.2 0.2
TEMP -173.15
BOND $H
ABIN
fmap 2
acta
OMIT 1 0 0
OMIT 0 0 1
OMIT 0 -1 1
OMIT 0 1 0
REM <olex2.extras>
REM <HklSrc "%.\\GB_RJ_RN_112917_0m_a_sq.hkl">
REM </olex2.extras>

WGHT    0.080700    7.079800
FVAR       0.07947   0.53389   0.52184   0.74153   0.69899   0.59556
F10   3   -0.088659    0.226856    0.314314    11.00000    0.02311    0.07808 =
         0.04575    0.01779    0.00718    0.01113
F20   3    1.051335    0.439151    1.180835    11.00000    0.03698    0.04978 =
         0.02663    0.00813   -0.00574   -0.00205
F39   3   -0.148832    0.046544    0.240850    11.00000    0.02628    0.06546 =
         0.08268    0.04552   -0.00051    0.00360
F21   3    0.957065    0.514414    1.138215    11.00000    0.03340    0.03549 =
         0.04863    0.00082    0.00683   -0.00229
F19   3    1.048218    0.477355    1.082053    11.00000    0.03560    0.07479 =
         0.03548    0.00697    0.00987   -0.02548
F37   3   -0.183899   -0.037768    0.282209    11.00000    0.02115    0.08322 =
         0.07105    0.03842    0.00491   -0.00742
F11   3    0.012619    0.246990    0.440364    11.00000    0.03537    0.08939 =
         0.03724    0.01972    0.01677    0.01703
F30   3    0.906481    0.423355    1.233450    11.00000    0.02674    0.09049 =
         0.03693    0.02124    0.00136   -0.01095
F40   3    0.238977   -0.050976    0.294348    11.00000    0.03873    0.07583 =
         0.06235    0.01036    0.03218    0.00792
F28   3    0.806135    0.403497    1.274991    11.00000    0.04466    0.12109 =
         0.02843    0.02658    0.01198   -0.00106
F7    3   -0.036405    0.028402    0.111890    11.00000    0.03673    0.06785 =
         0.04528   -0.01061    0.00230   -0.01403
F29   3    0.836027    0.310022    1.192639    11.00000    0.06516    0.05889 =
         0.04720    0.01899   -0.01727    0.00528
F8    3    0.094145   -0.010735    0.150369    11.00000    0.07547    0.06215 =
         0.03953   -0.00936    0.00281    0.02102
F17   3    0.857464    0.696080    0.885468    11.00000    0.05738    0.04946 =
         0.05858    0.00246    0.01708   -0.00128
F12   3    0.016425    0.326103    0.377636    11.00000    0.05954    0.04546 =
         0.11052    0.02522    0.04977    0.01933
F41   3    0.238140   -0.126831    0.360996    11.00000    0.06645    0.09060 =
         0.07762    0.03684    0.04640    0.05184
F27   3    0.707092    0.547150    0.975339    11.00000    0.10554    0.05150 =
         0.06038    0.02644    0.04387    0.00475
F9    3    0.070156    0.074751    0.091755    11.00000    0.09390    0.09995 =
         0.02291    0.00283    0.01891   -0.03207
F42   3    0.139137   -0.152016    0.232006    11.00000    0.04150    0.06843 =
         0.06808   -0.02647    0.02464   -0.00001
N1    4    0.408650    0.253382    0.683344    11.00000    0.02244    0.03534 =
         0.02093    0.01179    0.01061    0.00168
F18   3    0.776204    0.755257    0.802777    11.00000    0.11808    0.04547 =
         0.09228    0.03528    0.05642    0.00674
F3    3    0.845923    0.170325    0.422584    11.00000    0.03994    0.11044 =
         0.10399    0.05217    0.04544    0.01743
F2    3    0.802687    0.142446    0.504645    11.00000    0.07005    0.11922 =
         0.07679    0.05697    0.04591    0.05474
F25   3    0.749133    0.608161    1.103441    11.00000    0.12274    0.04287 =
         0.04902    0.00449    0.01587   -0.03914
F38   3   -0.155138   -0.072312    0.177286    11.00000    0.04215    0.12936 =
         0.04492   -0.04216   -0.01615    0.03324
F13   3    0.574935    0.583014    0.501002    11.00000    0.09838    0.13808 =
         0.07449    0.07667    0.00310    0.00705
F44   3   -0.157206    0.323524    0.566318    11.00000    0.06269    0.09479 =
         0.07543    0.00074    0.00298    0.04582
F45   3   -0.141962    0.401726    0.685471    11.00000    0.06424    0.07983 =
         0.10112   -0.03509   -0.00553    0.03652
F16   3    0.727015    0.718260    0.879342    11.00000    0.09532    0.05664 =
         0.09701    0.02579    0.06191    0.01803
F43   3   -0.224263    0.292465    0.633299    11.00000    0.02855    0.12030 =
         0.11164   -0.02350    0.01022    0.01521
F1    3    0.749443    0.070303    0.378306    11.00000    0.04545    0.05612 =
         0.15359   -0.02640    0.01937    0.00673
F26   3    0.606565    0.578220    1.018288    11.00000    0.07006    0.05204 =
         0.21704    0.06858    0.07355    0.02591
C60   1    0.416820    0.214097    0.806409    11.00000    0.01651    0.03489 =
         0.01807    0.01015    0.00596   -0.00131
C14   1    0.435829    0.131249    0.683977    11.00000    0.01718    0.03119 =
         0.01767    0.00599    0.00092   -0.00172
C56   1    0.922132    0.386343    1.047899    11.00000    0.01923    0.03470 =
         0.02204    0.00731    0.00613    0.00005
C15   1    0.382674    0.193008    0.710344    11.00000    0.01800    0.03427 =
         0.01679    0.00837    0.00384   -0.00482
C82   1    0.276384    0.169194    0.663485    11.00000    0.01961    0.03670 =
         0.01932    0.01316    0.00678   -0.00076
C40   1    0.662147    0.418985    0.741342    11.00000    0.02242    0.03485 =
         0.02445    0.01229    0.00774   -0.00045
C30   1    0.220085    0.184039    0.362281    11.00000    0.02084    0.03139 =
         0.01943    0.01291    0.00527   -0.00161
C39   1    0.583039    0.363972    0.690408    11.00000    0.01984    0.03855 =
         0.01702    0.01012    0.00437    0.00103
AFIX  43
H39   2    0.537115    0.371161    0.641714    11.00000   -1.20000
AFIX   0
C65   1    0.384156    0.164820    0.836062    11.00000    0.01618    0.03478 =
         0.01919    0.00856    0.00486   -0.00190
AFIX  43
H65   2    0.335199    0.123607    0.797353    11.00000   -1.20000
AFIX   0
C74   1    0.392867    0.116097    0.950521    11.00000    0.01963    0.03560 =
         0.02096    0.01123    0.00540   -0.00092
C17   1    0.352329    0.214716    0.505150    11.00000    0.02077    0.02891 =
         0.01951    0.00826    0.00859   -0.00192
AFIX  43
H17   2    0.308176    0.213270    0.526742    11.00000   -1.20000
AFIX   0
C64   1    0.421882    0.174696    0.921634    11.00000    0.01919    0.03228 =
         0.02107    0.00919    0.00786    0.00009
C57   1    0.854930    0.396044    0.976706    11.00000    0.02017    0.03169 =
         0.02349    0.00977    0.00770   -0.00034
AFIX  43
H57   2    0.853950    0.445495    0.971227    11.00000   -1.20000
AFIX   0
C35   1    0.184920    0.127830    0.283136    11.00000    0.02778    0.03316 =
         0.02143    0.01091    0.00758    0.00061
AFIX  43
H35   2    0.225781    0.099809    0.264793    11.00000   -1.20000
AFIX   0
C66   1    0.603360    0.349780    1.010045    11.00000    0.02210    0.03016 =
         0.01941    0.00621    0.00931   -0.00044
C95   1   -0.128281   -0.018778    0.251227    11.00000    0.02268    0.03713 =
         0.02890    0.00136    0.00510    0.00090
C20   1    0.481085    0.218049    0.441754    11.00000    0.02348    0.02906 =
         0.02054    0.00458    0.00906   -0.00149
C92   1   -0.028044   -0.013522    0.309062    11.00000    0.02031    0.03033 =
         0.02566    0.00529    0.00555   -0.00012
C31   1    0.158652    0.223943    0.387888    11.00000    0.02388    0.03104 =
         0.01876    0.00949    0.00539   -0.00202
AFIX  43
H31   2    0.181542    0.262437    0.441699    11.00000   -1.20000
AFIX   0
C83   1    0.235845    0.117436    0.582326    11.00000    0.01791    0.03542 =
         0.02192    0.01156    0.00982    0.00179
AFIX  43
H83   2    0.274539    0.093255    0.558228    11.00000   -1.20000
AFIX   0
C52   1    0.788227    0.334334    0.912468    11.00000    0.01710    0.03153 =
         0.02087    0.00905    0.00833    0.00099
C22   1    0.551097    0.220964    0.409330    11.00000    0.02677    0.03551 =
         0.01920    0.00275    0.01095   -0.00331
C16   1    0.445998    0.230503    0.559592    11.00000    0.02162    0.02842 =
         0.01773    0.00772    0.00725   -0.00115
C62   1    0.524716    0.287126    0.950229    11.00000    0.02052    0.02950 =
         0.01884    0.00785    0.00760    0.00122
C93   1    0.006976    0.037433    0.390653    11.00000    0.01784    0.02975 =
         0.02458    0.00747    0.00742    0.00270
AFIX  43
H93   2   -0.032494    0.068263    0.408257    11.00000   -1.20000
AFIX   0
C8    1    0.480853    0.238626    0.653502    11.00000    0.01809    0.03544 =
         0.01790    0.00807    0.00763   -0.00190
C67   1    0.608314    0.420621    0.998473    11.00000    0.02739    0.03342 =
         0.02449    0.00794    0.01124   -0.00091
AFIX  43
H67   2    0.560206    0.429365    0.952048    11.00000   -1.20000
AFIX   0
C9    1    0.493606    0.157910    0.656840    11.00000    0.01611    0.03361 =
         0.01768    0.00782    0.00075   -0.00148
C34   1    0.089717    0.112456    0.230543    11.00000    0.02718    0.03739 =
         0.02148    0.01037    0.00418   -0.00405
C21   1    0.509970    0.231299    0.526735    11.00000    0.01867    0.03336 =
         0.02026    0.00646    0.00656   -0.00218
AFIX  43
H21   2    0.574398    0.241081    0.563175    11.00000   -1.20000
AFIX   0
C63   1    0.490868    0.237264    0.978159    11.00000    0.02242    0.03466 =
         0.01572    0.00980    0.00607    0.00218
AFIX  43
H63   2    0.515031    0.245843    1.036694    11.00000   -1.20000
AFIX   0
C54   1    0.857198    0.254376    0.996695    11.00000    0.03134    0.03601 =
         0.02745    0.01393    0.01001    0.00254
C42   1    0.717031    0.344454    0.835129    11.00000    0.01744    0.03197 =
         0.01973    0.00715    0.00722   -0.00001
C87   1    0.219579    0.204142    0.698352    11.00000    0.02275    0.03312 =
         0.01749    0.00749    0.00598   -0.00246
AFIX  43
H87   2    0.246581    0.239389    0.754182    11.00000   -1.20000
AFIX   0
C27   1    0.628247    0.184173    0.433460    11.00000    0.02557    0.03916 =
         0.02063    0.00262    0.00973   -0.00496
AFIX  43
H27   2    0.635994    0.156852    0.471170    11.00000   -1.20000
AFIX   0
C84   1    0.139759    0.099712    0.534824    11.00000    0.01906    0.02911 =
         0.01999    0.00967    0.00523    0.00064
C18   1    0.321392    0.200885    0.419258    11.00000    0.02291    0.02812 =
         0.01941    0.00868    0.00700    0.00051
C61   1    0.487702    0.274588    0.863850    11.00000    0.01744    0.03441 =
         0.01948    0.01249    0.00522   -0.00213
AFIX  43
H61   2    0.511486    0.308022    0.844249    11.00000   -1.20000
AFIX   0
C32   1    0.063633    0.207807    0.335063    11.00000    0.02181    0.03824 =
         0.02765    0.01650    0.00560    0.00178
C89   1    0.154193   -0.002767    0.417378    11.00000    0.01665    0.03702 =
         0.03405    0.01072    0.00784    0.00252
AFIX  43
H89   2    0.217117   -0.000539    0.454443    11.00000   -1.20000
AFIX   0
C38   1    0.569746    0.298704    0.709235    11.00000    0.01840    0.03315 =
         0.01630    0.00529    0.00719   -0.00295
C70   1    0.749345    0.396559    1.134620    11.00000    0.02662    0.03915 =
         0.02040    0.00297    0.00905   -0.00258
C88   1    0.099499    0.044077    0.447350    11.00000    0.01980    0.02902 =
         0.02231    0.00929    0.00661    0.00011
F15   3    0.708566    0.564724    0.516231    11.00000    0.09235    0.21420 =
         0.08550    0.09175    0.03103   -0.02188
C36   1    0.000762    0.251815    0.366054    11.00000    0.02778    0.04530 =
         0.03902    0.01407    0.01002    0.00461
C55   1    0.923957    0.315361    1.059165    11.00000    0.02518    0.04127 =
         0.02204    0.01105    0.00560    0.00326
AFIX  43
H55   2    0.969719    0.308818    1.108349    11.00000   -1.20000
AFIX   0
C13   1    0.432980    0.057132    0.687473    11.00000    0.02707    0.03640 =
         0.02805    0.01301    0.00667   -0.00236
AFIX  43
H13   2    0.393186    0.039173    0.706890    11.00000   -1.20000
AFIX   0
C53   1    0.791228    0.263322    0.924207    11.00000    0.02476    0.03145 =
         0.02191    0.00697    0.00641   -0.00250
AFIX  43
H53   2    0.747237    0.220228    0.881735    11.00000   -1.20000
AFIX   0
C69   1    0.754545    0.466749    1.122898    11.00000    0.02802    0.03440 =
         0.02822   -0.00216    0.01274   -0.00625
AFIX  43
H69   2    0.805877    0.506206    1.160880    11.00000   -1.20000
AFIX   0
C41   1    0.728660    0.408329    0.813166    11.00000    0.01806    0.03162 =
         0.02312    0.00737    0.00615   -0.00380
AFIX  43
H41   2    0.783129    0.445443    0.847911    11.00000   -1.20000
AFIX   0
C23   1    0.541709    0.260963    0.354898    11.00000    0.03661    0.04224 =
         0.02860    0.01002    0.01519   -0.00222
AFIX  43
H23   2    0.489606    0.286299    0.337435    11.00000   -1.20000
AFIX   0
C37   1    0.054391    0.051434    0.145649    11.00000    0.03370    0.04996 =
         0.02921    0.00694    0.00296   -0.00124
F14   3    0.600346    0.470850    0.472512    11.00000    0.20140    0.10534 =
         0.04638    0.03842    0.03843   -0.02510
C43   1    0.636912    0.289532    0.781223    11.00000    0.01794    0.03165 =
         0.02056    0.00936    0.00864   -0.00103
AFIX  43
H43   2    0.628498    0.244962    0.794395    11.00000   -1.20000
AFIX   0
C86   1    0.123269    0.188327    0.652657    11.00000    0.02085    0.03547 =
         0.02416    0.00938    0.00796    0.00035
PART 1
F5    3    0.637325    0.373900    0.308012    31.00000    0.24612    0.03305 =
         0.09837    0.02694    0.13498    0.02165
PART 0
C75   1    0.379155    0.038595    0.904803    11.00000    0.02374    0.03764 =
         0.01962    0.01220    0.00510   -0.00027
AFIX  43
H75   2    0.385243    0.023862    0.853775    11.00000   -1.20000
AFIX   0
C58   1    0.994681    0.453914    1.112361    11.00000    0.02437    0.04122 =
         0.02141    0.00720    0.00360   -0.00095
C68   1    0.683246    0.478462    1.054494    11.00000    0.03165    0.03022 =
         0.03194    0.00452    0.01738   -0.00173
C24   1    0.608502    0.264163    0.325643    11.00000    0.04949    0.04894 =
         0.03093    0.01258    0.02157   -0.00661
C19   1    0.386308    0.202750    0.387855    11.00000    0.02487    0.03200 =
         0.01551    0.00740    0.00706    0.00049
AFIX  43
H19   2    0.366156    0.193594    0.329580    11.00000   -1.20000
AFIX   0
C90   1    0.119021   -0.052134    0.335309    11.00000    0.02504    0.03204 =
         0.03445    0.00224    0.01255   -0.00012
C33   1    0.029108    0.152262    0.256180    11.00000    0.02280    0.04113 =
         0.02635    0.01635    0.00011   -0.00324
AFIX  43
H33   2   -0.035475    0.141678    0.220153    11.00000   -1.20000
AFIX   0
C1    1    0.380108    0.326138    0.704937    11.00000    0.02795    0.02845 =
         0.02932    0.00464    0.00844   -0.00001
AFIX  13
H1    2    0.404993    0.353034    0.766859    11.00000   -1.20000
AFIX   0
PART 1
F6    3    0.642756    0.279513    0.217851    31.00000    0.13198    0.04978 =
         0.06466    0.03164    0.07479    0.02054
PART 0
C44   1    0.676683    0.487424    0.719484    11.00000    0.02052    0.04158 =
         0.03507    0.02035    0.00658   -0.00042
C85   1    0.084064    0.136028    0.571673    11.00000    0.01807    0.03374 =
         0.02204    0.00776    0.00429    0.00012
AFIX  43
H85   2    0.018510    0.124640    0.540709    11.00000   -1.20000
AFIX   0
C29   1    0.772306    0.142577    0.427169    11.00000    0.02607    0.05337 =
         0.04675    0.00605    0.01942    0.00013
C71   1    0.675040    0.338678    1.078892    11.00000    0.02619    0.03344 =
         0.01779    0.00533    0.00766   -0.00133
AFIX  43
H71   2    0.672823    0.290789    1.087634    11.00000   -1.20000
AFIX   0
C10   1    0.550054    0.110697    0.631472    11.00000    0.02279    0.04072 =
         0.03436    0.01220    0.00912    0.00256
AFIX  43
H10   2    0.590281    0.129116    0.612738    11.00000   -1.20000
AFIX   0
C72   1    0.824537    0.383233    1.208982    11.00000    0.03341    0.04950 =
         0.02546    0.00657    0.00467   -0.00712
C26   1    0.693682    0.186847    0.403324    11.00000    0.02893    0.04103 =
         0.02311   -0.00351    0.01217   -0.00670
PART 1
F22   3    0.909855    0.182105    1.084061    21.00000    0.08034    0.03976 =
         0.03823    0.02649   -0.00395    0.00909
F46A  3    0.156479    0.276766    0.948690    41.00000    0.07714    0.12700 =
         0.03423    0.02010    0.03146    0.01066
PART 0
C76   1    0.356881   -0.017437    0.931935    11.00000    0.03234    0.03518 =
         0.02884    0.01515    0.00707    0.00055
C91   1    0.026822   -0.058101    0.279822    11.00000    0.02505    0.03428 =
         0.02676   -0.00148    0.00700   -0.00115
AFIX  43
H91   2    0.002362   -0.091917    0.223403    11.00000   -1.20000
AFIX   0
C79   1    0.384922    0.135866    1.025558    11.00000    0.05337    0.03711 =
         0.03405    0.01312    0.02512    0.00337
AFIX  43
H79   2    0.393327    0.188430    1.057775    11.00000   -1.20000
AFIX   0
C12   1    0.489034    0.010186    0.662212    11.00000    0.03249    0.03304 =
         0.03776    0.01203    0.00487    0.00339
AFIX  43
H12   2    0.487897   -0.040488    0.664290    11.00000   -1.20000
AFIX   0
C45   1    0.716304    0.558685    0.781559    11.00000    0.02961    0.04183 =
         0.03900    0.02257    0.00571    0.00257
AFIX  43
H45   2    0.733954    0.563647    0.838603    11.00000   -1.20000
AFIX   0
C25   1    0.684388    0.227000    0.349547    11.00000    0.03504    0.05065 =
         0.03133    0.00198    0.02028   -0.00825
AFIX  43
H25   2    0.729481    0.229164    0.329121    11.00000   -1.20000
AFIX   0
C73   1    0.686740    0.552894    1.038821    11.00000    0.03875    0.03289 =
         0.04719    0.00568    0.01804   -0.00503
C11   1    0.547155    0.036743    0.633736    11.00000    0.02555    0.04040 =
         0.04303    0.00936    0.00912    0.00844
AFIX  43
H11   2    0.584939    0.003943    0.615806    11.00000   -1.20000
AFIX   0
C96   1    0.065744    0.228448    0.693112    11.00000    0.02061    0.03829 =
         0.02789   -0.00288    0.00783   -0.00496
C59   1    0.856511    0.177423    1.007338    11.00000    0.05707    0.03907 =
         0.03892    0.01800    0.00077    0.00087
C98   1   -0.062349    0.296704    0.689525    11.00000    0.02699    0.05332 =
         0.05283   -0.01724    0.01089    0.00147
C94   1    0.183072   -0.096297    0.305382    11.00000    0.02432    0.04919 =
         0.04704   -0.00118    0.01255    0.00224
C101  1    0.090925    0.239771    0.777680    11.00000    0.02779    0.03984 =
         0.03257   -0.00282    0.01430   -0.00960
AFIX  43
H101  2    0.143491    0.220315    0.808525    11.00000   -1.20000
AFIX   0
PART 1
F48A  3    0.072025    0.359991    0.954710    41.00000    0.13191    0.08646 =
         0.04571   -0.01526    0.03899    0.01655
PART 0
C48   1    0.665094    0.545497    0.615816    11.00000    0.04128    0.07044 =
         0.05006    0.04132    0.00662   -0.00604
C97   1   -0.011640    0.257437    0.649157    11.00000    0.02475    0.04968 =
         0.03300   -0.00610    0.00467    0.00269
AFIX  43
H97   2   -0.029906    0.250439    0.591552    11.00000   -1.20000
AFIX   0
PART 1
F47A  3    0.017640    0.241962    0.920977    41.00000    0.10524    0.15845 =
         0.05949    0.00936    0.03904   -0.07655
PART 0
C49   1    0.650612    0.481331    0.635913    11.00000    0.03744    0.05307 =
         0.03826    0.02468    0.00792   -0.00651
AFIX  43
H49   2    0.622865    0.433122    0.592635    11.00000   -1.20000
AFIX   0
C99   1   -0.036727    0.307332    0.773087    11.00000    0.03555    0.05092 =
         0.05643   -0.01971    0.02556   -0.00675
AFIX  43
H99   2   -0.071753    0.333935    0.800138    11.00000   -1.20000
AFIX   0
C77   1    0.349183    0.002279    1.006468    11.00000    0.05272    0.04159 =
         0.04251    0.02194    0.02416    0.00130
AFIX  43
H77   2    0.333485   -0.036212    1.025042    11.00000   -1.20000
AFIX   0
C103  1   -0.145489    0.328574    0.643697    11.00000    0.03660    0.07281 =
         0.06745   -0.02228    0.00356    0.01654
C2    1    0.369483    0.379095    0.656242    11.00000    0.04075    0.04584 =
         0.03685    0.01529    0.01723    0.00737
AFIX  13
H2    2    0.376843    0.356513    0.603433    11.00000   -1.20000
AFIX   0
C100  1    0.040113    0.279098    0.817239    11.00000    0.03626    0.04593 =
         0.04167   -0.00891    0.02381   -0.01271
PART 1
C80   1    0.353352   -0.103237    0.882728    61.00000    0.02998    0.03458 =
         0.03617    0.01887    0.00930    0.01585
PART 0
C46   1    0.730405    0.622658    0.761281    11.00000    0.03625    0.04130 =
         0.05208    0.02650    0.01107    0.00126
C78   1    0.364768    0.079336    1.053878    11.00000    0.07157    0.04617 =
         0.04226    0.01885    0.03637    0.00553
C47   1    0.705420    0.616364    0.678598    11.00000    0.04128    0.05960 =
         0.06581    0.04501    0.01001   -0.00229
AFIX  43
H47   2    0.715727    0.660105    0.664813    11.00000   -1.20000
AFIX   0
C3    1    0.284555    0.340569    0.655384    11.00000    0.03755    0.04610 =
         0.03616    0.01356    0.01418    0.00576
AFIX  13
H3    2    0.246261    0.297398    0.602308    11.00000   -1.20000
AFIX   0
C102  1    0.067424    0.288943    0.907248    11.00000    0.05986    0.06702 =
         0.04471   -0.01005    0.03582   -0.02094
C28   1    0.597908    0.308981    0.268385    11.00000    0.06919    0.07431 =
         0.05919    0.03832    0.03991    0.00967
C4    1    0.229313    0.386991    0.696228    11.00000    0.04464    0.04246 =
         0.04286    0.00892    0.02111    0.00877
AFIX  23
H4A   2    0.269298    0.434877    0.740204    11.00000   -1.20000
H4B   2    0.207686    0.357266    0.723353    11.00000   -1.20000
AFIX   0
C50   1    0.638538    0.539332    0.526741    11.00000    0.07864    0.09255 =
         0.06095    0.05171    0.01462   -0.02113
C6    1    0.405455    0.464635    0.699263    11.00000    0.06078    0.04559 =
         0.05117    0.02506    0.02518    0.01137
AFIX  23
H6A   2    0.351585    0.492180    0.685814    11.00000   -1.20000
H6B   2    0.444050    0.479471    0.674314    11.00000   -1.20000
AFIX   0
C7    1    0.462545    0.493232    0.794949    11.00000    0.06014    0.04720 =
         0.05467    0.01920    0.01724   -0.00410
AFIX 137
H7A   2    0.514883    0.465093    0.809952    11.00000   -1.50000
H7B   2    0.423325    0.484704    0.821433    11.00000   -1.50000
H7C   2    0.485912    0.548174    0.814609    11.00000   -1.50000
AFIX   0
PART 1
C81   1    0.370399    0.101958    1.144603    51.00000    0.12001    0.05545 =
         0.02690    0.01819    0.03668   -0.00572
PART 0
C51   1    0.774474    0.698384    0.831539    11.00000    0.05772    0.04722 =
         0.07465    0.03044    0.03103    0.00654
C5    1    0.145356    0.406813    0.630408    11.00000    0.06200    0.07831 =
         0.07289    0.00744    0.02065    0.02967
AFIX 137
H5A   2    0.108100    0.359518    0.584953    11.00000   -1.50000
H5B   2    0.167015    0.440338    0.607459    11.00000   -1.50000
H5C   2    0.107462    0.433211    0.656875    11.00000   -1.50000
AFIX   0
PART 1
F23   3    0.768596    0.157176    0.999861    21.00000    0.07259    0.07498 =
         0.16609    0.08795    0.02401   -0.00868
F24   3    0.871273    0.128782    0.955324    21.00000    0.23762    0.04311 =
         0.06777    0.02772    0.08091    0.06342
F4    3    0.510966    0.298416    0.208795    31.00000    0.06295    0.26939 =
         0.12378    0.16284    0.02451    0.01194
PART 0
PART 2
F22A  3    0.939269    0.148253    1.012930   -21.00000    0.05996    0.06165 =
         0.22322    0.07224    0.03264    0.02561
F24A  3    0.797297    0.119684    0.943273   -21.00000    0.08272    0.03225 =
         0.06699    0.01942   -0.01125   -0.00820
F23A  3    0.850360    0.172223    1.070647   -21.00000    0.27870    0.05225 =
         0.08870    0.04136    0.10711    0.02699
F4A   3    0.523194    0.350142    0.260939   -31.00000    0.07757    0.09432 =
         0.06962    0.05940    0.04170    0.01741
F5A   3    0.661224    0.374484    0.302009   -31.00000    0.08561    0.14346 =
         0.15810    0.10416    0.06001   -0.01341
F6A   3    0.587335    0.276304    0.199472   -31.00000    0.27980    0.14478 =
         0.06549    0.05673    0.10628    0.08210
F48   3    0.123670    0.350796    0.952607   -41.00000    0.13191    0.08646 =
         0.04571   -0.01526    0.03899    0.01655
F46   3    0.087911    0.225677    0.919272   -41.00000    0.07714    0.12700 =
         0.03423    0.02010    0.03146    0.01066
F47   3   -0.009767    0.299288    0.917237   -41.00000    0.10524    0.15845 =
         0.05949    0.00936    0.03904   -0.07655
PART 0
PART 1
F32   3    0.389602    0.175271    1.183206    51.00000    0.07274    0.07405 =
         0.03335    0.01324    0.02937    0.00143
F33   3    0.287236    0.073025    1.136157    51.00000    0.14371    0.15287 =
         0.07712    0.02899    0.08234   -0.03759
F31   3    0.441150    0.076098    1.194425    51.00000    0.23323    0.11296 =
         0.03861    0.04979    0.05639    0.08538
PART 0
PART 2
F32A  3    0.364529    0.160689    1.172910   -51.00000    0.07274    0.07405 =
         0.03335    0.01324    0.02937    0.00143
C81A  1    0.339782    0.093458    1.116876   -51.00000    0.12001    0.05545 =
         0.02690    0.01819    0.03668   -0.00572
F31A  3    0.356187    0.043558    1.159480   -51.00000    0.23323    0.11296 =
         0.03861    0.04979    0.05639    0.08538
F33A  3    0.252511    0.102100    1.103230   -51.00000    0.14371    0.15287 =
         0.07712    0.02899    0.08234   -0.03759
PART 0
PART 1
F34A  3    0.384184   -0.143664    0.934082    61.00000    0.04331    0.03314 =
         0.04271    0.02302    0.00724    0.01442
F36   3    0.266618   -0.133893    0.826849    61.00000    0.04638    0.03791 =
         0.05965   -0.00100   -0.01092    0.00396
F35   3    0.405216   -0.112075    0.841472    61.00000    0.09775    0.04001 =
         0.08690    0.00841    0.06821    0.01109
PART 0
PART 2
F34   3    0.375887   -0.138549    0.919581   -61.00000    0.12028    0.06333 =
         0.06929    0.03199   -0.01177    0.03567
F35A  3    0.331705   -0.111376    0.808988   -61.00000    0.10690    0.03312 =
         0.05306    0.00516    0.04956    0.00562
F36A  3    0.242733   -0.129244    0.862251   -61.00000    0.05644    0.04817 =
         0.05164    0.00717    0.01318   -0.01543
C80A  1    0.326465   -0.095420    0.881255   -61.00000    0.02998    0.03458 =
         0.03617    0.01887    0.00930    0.01585
HKLF 4


REM  GB_RJ_RN_112917_0m_a.res in P-1
REM R1 =  0.0629 for   12644 Fo > 4sig(Fo)  and  0.0901 for all   17345 data
REM   1481 parameters refined using    204 restraints

END

WGHT      0.0807      7.0795

REM Highest difference peak  0.710,  deepest hole -0.536,  1-sigma level  0.062
Q1    1  -0.1405 -0.0066  0.1787  11.00000  0.05    0.71
Q2    1   0.8073  0.6860  0.7891  11.00000  0.05    0.65
Q3    1   0.8594  0.7253  0.8061  11.00000  0.05    0.63
Q4    1   0.1600 -0.1695  0.2994  11.00000  0.05    0.57
Q5    1   0.3211  0.3736  0.7334  11.00000  0.05    0.57
Q6    1   0.6575  0.6048  1.0867  11.00000  0.05    0.55
Q7    1   0.0371  0.4143  0.6164  11.00000  0.05    0.52
Q8    1   0.0151  0.3312  0.9329  11.00000  0.05    0.52
Q9    1   0.7603  0.6128  0.7285  11.00000  0.05    0.52
Q10   1   0.6336  0.5569  0.9727  11.00000  0.05    0.50
;
_shelx_res_checksum               32496
_shelx_hkl_file
;
   1   0   0    0.00    0.01
  -2   0   0    0.02    0.04
  -2   0   0    0.07    0.02
  -2   0   0    0.06    0.02
  -2   0   0    0.05    0.04
   2   0   0    0.05    0.04
   2   0   0    0.06    0.02
  -3   0   0    7.45    0.15
  -3   0   0    7.12    0.21
  -3   0   0    6.99    0.21
  -3   0   0    7.09    0.15
  -3   0   0    7.44    0.22
   3   0   0    6.29    0.14
   3   0   0    6.99    0.15
   3   0   0    7.30    0.21
  -4   0   0   50.63    0.83
  -4   0   0   48.78    0.83
  -4   0   0   50.39    0.92
  -4   0   0   50.51    0.93
  -4   0   0   49.64    0.92
   4   0   0   48.97    0.92
   4   0   0   49.30    0.83
   4   0   0   50.62    0.84
  -5   0   0   52.68    1.01
  -5   0   0   53.01    0.90
  -5   0   0   54.19    1.02
  -5   0   0   54.62    0.90
  -5   0   0   53.37    1.01
   5   0   0   52.88    0.90
   5   0   0   53.05    1.02
   5   0   0   54.13    0.90
  -6   0   0    0.75    0.11
  -6   0   0    0.87    0.07
  -6   0   0    1.02    0.14
  -6   0   0    0.96    0.07
  -6   0   0    0.98    0.14
   6   0   0    0.93    0.08
   6   0   0    0.83    0.07
   6   0   0    0.81    0.12
  -7   0   0    0.34    0.12
  -7   0   0    0.21    0.12
  -7   0   0    0.22    0.11
  -7   0   0    0.33    0.06
  -7   0   0    0.28    0.06
   7   0   0    0.39    0.06
   7   0   0    0.27    0.06
   7   0   0    0.34    0.11
  -8   0   0   30.46    0.72
  -8   0   0   29.74    0.57
  -8   0   0   29.60    0.56
  -8   0   0   30.14    0.73
   8   0   0   30.53    0.74
   8   0   0   30.48    0.55
   8   0   0   30.81    0.57
  -9   0   0   25.21    0.66
  -9   0   0   24.53    0.49
  -9   0   0   25.21    0.66
  -9   0   0   24.56    0.49
   9   0   0   24.59    0.48
   9   0   0   24.15    0.47
 -10   0   0    3.77    0.16
 -10   0   0    3.85    0.28
 -10   0   0    3.41    0.15
 -10   0   0    3.27    0.29
  10   0   0    3.64    0.15
  10   0   0    3.67    0.14
 -11   0   0    8.19    0.24
 -11   0   0    8.05    0.39
 -11   0   0    8.31    0.40
 -11   0   0    8.71    0.25
  11   0   0    8.64    0.22
 -12   0   0    1.74    0.13
 -12   0   0    1.45    0.23
 -12   0   0    1.45    0.22
  12   0   0    1.74    0.10
 -13   0   0   11.04    0.31
 -13   0   0   11.18    0.30
 -13   0   0   11.54    0.51
 -13   0   0   10.70    0.49
 -14   0   0    3.71    0.36
 -14   0   0    3.02    0.16
 -14   0   0    3.45    0.34
 -15   0   0    0.15    0.08
 -15   0   0    0.20    0.20
 -15   0   0    0.19    0.20
 -16   0   0    0.07    0.19
 -16   0   0    0.29    0.08
 -16   0   0    0.21    0.21
 -17   0   0    3.40    0.37
 -17   0   0    3.88    0.40
 -17   1   0    0.50    0.26
 -17   1   0    0.27    0.09
 -17   1   0    0.37    0.25
 -16   1   0   -0.12    0.20
 -16   1   0   -0.06    0.08
 -16   1   0   -0.16    0.18
 -15   1   0    2.84    0.34
 -15   1   0    2.17    0.30
 -15   1   0    2.66    0.17
 -14   1   0    0.76    0.22
 -14   1   0    0.76    0.23
 -14   1   0    0.88    0.12
 -13   1   0    0.37    0.19
 -13   1   0    0.39    0.09
 -13   1   0    0.32    0.19
  12  -1   0    0.37    0.08
 -12   1   0    0.23    0.17
 -12   1   0    0.22    0.08
 -12   1   0    0.31    0.18
  11  -1   0   10.70    0.28
 -11   1   0   10.79    0.31
 -11   1   0   10.52    0.29
 -11   1   0   11.27    0.46
 -11   1   0   11.02    0.45
  10  -1   0    4.58    0.17
 -10   1   0    5.04    0.31
 -10   1   0    4.81    0.19
 -10   1   0    4.86    0.30
 -10   1   0    4.94    0.20
   9  -1   0    2.00    0.12
   9  -1   0    1.77    0.13
  -9   1   0    1.78    0.13
  -9   1   0    1.74    0.13
  -9   1   0    1.61    0.19
  -9   1   0    1.66    0.20
   8  -1   0   53.43    0.96
   8  -1   0   55.03    0.98
   8  -1   0   54.36    1.14
  -8   1   0   54.41    1.13
  -8   1   0   54.93    0.98
  -8   1   0   57.07    1.14
  -8   1   0   54.73    0.98
   7  -1   0   17.68    0.38
   7  -1   0   17.84    0.50
   7  -1   0   17.26    0.36
  -7   1   0   18.62    0.50
  -7   1   0   18.36    0.50
  -7   1   0   17.07    0.38
  -7   1   0   17.37    0.38
  -7   1   0   17.61    0.49
   6  -1   0    3.23    0.20
   6  -1   0    3.71    0.14
  -6   1   0    3.95    0.22
  -6   1   0    3.53    0.20
  -6   1   0    3.63    0.14
  -6   1   0    3.62    0.14
  -6   1   0    3.58    0.21
   5  -1   0  104.23    1.81
   5  -1   0  103.28    1.70
  -5   1   0  102.93    1.70
  -5   1   0  101.21    1.78
  -5   1   0  101.68    1.79
  -5   1   0  101.65    1.70
  -5   1   0  102.25    1.79
   4  -1   0   10.83    0.30
   4  -1   0   10.92    0.25
  -4   1   0   11.18    0.25
  -4   1   0   11.10    0.30
  -4   1   0   11.13    0.24
  -4   1   0   11.06    0.31
   3  -1   0   47.20    0.83
   3  -1   0   49.85    0.84
   3  -1   0   50.37    0.90
  -3   1   0   49.06    0.88
  -3   1   0   49.59    0.84
  -3   1   0   50.28    0.84
  -3   1   0   50.05    0.89
   2  -1   0    5.90    0.14
   2  -1   0    5.93    0.17
  -2   1   0    6.21    0.13
  -2   1   0    5.72    0.14
  -2   1   0    6.08    0.14
  -2   1   0    6.15    0.16
  -2   1   0    6.22    0.17
   1  -1   0    3.32    0.09
   1  -1   0    3.45    0.09
  -1   1   0    3.20    0.08
   0  -1   0   -0.01    0.01
  -1  -1   0   39.13    0.66
  -1  -1   0   38.30    0.67
  -1  -1   0   40.97    0.69
  -1  -1   0   39.63    0.67
  -2  -1   0   79.05    1.41
  -2  -1   0   79.93    1.34
  -2  -1   0   85.37    1.35
  -2  -1   0   81.37    1.34
  -2  -1   0   81.47    1.42
   2   1   0   80.99    1.33
   2   1   0   82.27    1.33
   2   1   0   76.92    1.41
   2   1   0   78.11    1.34
  -3  -1   0  198.17    3.37
  -3  -1   0  180.02    3.20
  -3  -1   0  185.35    3.36
  -3  -1   0  190.91    3.11
  -3  -1   0  190.21    3.11
   3   1   0  190.59    3.10
   3   1   0  193.87    3.11
  -4  -1   0   88.77    1.52
  -4  -1   0   87.62    1.48
  -4  -1   0   88.51    1.53
  -4  -1   0   92.96    1.47
  -4  -1   0   89.51    1.53
   4   1   0   81.40    1.45
   4   1   0   89.09    1.48
  -5  -1   0    1.02    0.12
  -5  -1   0    0.98    0.06
  -5  -1   0    1.06    0.12
  -5  -1   0    0.87    0.10
  -5  -1   0    0.99    0.06
   5   1   0    1.02    0.06
   5   1   0    1.08    0.06
  -6  -1   0    4.17    0.21
  -6  -1   0    4.04    0.21
  -6  -1   0    4.16    0.12
  -6  -1   0    4.43    0.23
  -6  -1   0    4.22    0.12
   6   1   0    4.06    0.11
   6   1   0    4.13    0.11
  -7  -1   0    0.07    0.10
  -7  -1   0    0.00    0.04
  -7  -1   0    0.04    0.04
  -7  -1   0    0.07    0.10
  -7  -1   0    0.00    0.10
   7   1   0    0.03    0.04
   7   1   0    0.07    0.04
  -8  -1   0    0.50    0.12
  -8  -1   0    0.62    0.06
  -8  -1   0    0.57    0.06
  -8  -1   0    0.61    0.14
   8   1   0    0.72    0.06
   8   1   0    0.63    0.06
  -9  -1   0    2.64    0.23
  -9  -1   0    2.80    0.25
  -9  -1   0    2.69    0.12
  -9  -1   0    2.67    0.12
   9   1   0    2.79    0.10
   9   1   0    2.57    0.10
 -10  -1   0    0.44    0.07
 -10  -1   0    0.44    0.07
 -10  -1   0    0.30    0.14
 -10  -1   0    0.45    0.15
  10   1   0    0.47    0.05
  10   1   0    0.46    0.05
 -11  -1   0    1.01    0.18
 -11  -1   0    0.87    0.18
 -11  -1   0    1.03    0.09
 -12  -1   0   -0.16    0.15
 -12  -1   0    0.24    0.15
 -12  -1   0    0.05    0.06
 -13  -1   0    0.42    0.07
 -13  -1   0    0.29    0.18
 -13  -1   0    0.39    0.07
 -13  -1   0    0.57    0.19
 -14  -1   0    0.39    0.07
 -14  -1   0    0.27    0.20
 -14  -1   0    0.46    0.20
 -15  -1   0    3.13    0.34
 -15  -1   0    3.37    0.12
 -15  -1   0    3.24    0.33
 -16  -1   0    2.96    0.35
 -16  -1   0    3.89    0.39
 -16  -1   0    3.91    0.37
 -17  -1   0    0.75    0.26
 -17  -1   0    0.71    0.25
 -17   2   0    0.37    0.22
 -17   2   0    0.55    0.12
 -17   2   0    0.56    0.24
 -16   2   0    1.81    0.16
 -16   2   0    1.82    0.29
 -16   2   0    1.18    0.27
 -15   2   0    0.73    0.12
 -15   2   0    0.69    0.22
 -15   2   0    0.72    0.24
 -14   2   0   11.72    0.56
 -14   2   0   12.57    0.56
 -14   2   0   11.49    0.35
 -13   2   0    1.40    0.14
 -13   2   0    1.50    0.25
 -13   2   0    1.29    0.23
 -13   2   0    1.50    0.19
  12  -2   0    1.23    0.12
 -12   2   0    0.91    0.20
 -12   2   0    1.19    0.16
 -12   2   0    1.33    0.25
 -12   2   0    1.03    0.13
  11  -2   0    0.15    0.07
 -11   2   0    0.20    0.08
 -11   2   0    0.15    0.10
 -11   2   0    0.20    0.09
 -11   2   0    0.17    0.15
 -11   2   0    0.21    0.14
  10  -2   0   26.24    0.53
 -10   2   0   26.46    0.71
 -10   2   0   25.67    0.56
 -10   2   0   23.80    0.54
 -10   2   0   26.14    0.62
 -10   2   0   24.98    0.70
   9  -2   0    6.55    0.27
  -9   2   0    6.77    0.34
  -9   2   0    6.37    0.33
  -9   2   0    6.55    0.24
  -9   2   0    6.74    0.27
  -9   2   0    6.30    0.23
   8  -2   0   18.45    0.43
   8  -2   0   18.94    0.56
  -8   2   0   18.75    0.53
  -8   2   0   18.60    0.42
  -8   2   0   19.05    0.46
  -8   2   0   18.29    0.54
  -8   2   0   19.05    0.43
   7  -2   0    6.55    0.22
   7  -2   0    6.40    0.30
  -7   2   0    5.85    0.28
  -7   2   0    5.82    0.21
  -7   2   0    6.28    0.23
  -7   2   0    6.55    0.29
  -7   2   0    6.05    0.22
  -7   2   0    6.30    0.29
   6  -2   0    1.24    0.14
   6  -2   0    1.38    0.11
   6  -2   0    1.52    0.12
  -6   2   0    1.51    0.12
  -6   2   0    1.47    0.16
  -6   2   0    1.54    0.12
  -6   2   0    1.41    0.16
  -6   2   0    1.28    0.12
  -6   2   0    1.28    0.14
   5  -2   0   55.32    0.97
   5  -2   0   52.50    1.04
   5  -2   0   54.12    0.95
  -5   2   0   53.71    0.95
  -5   2   0   53.87    1.03
  -5   2   0   55.39    0.96
  -5   2   0   54.62    1.04
  -5   2   0   54.49    0.96
   4  -2   0   57.58    1.01
   4  -2   0   57.63    1.02
   4  -2   0   56.94    1.08
  -4   2   0   60.65    1.02
  -4   2   0   59.59    1.08
  -4   2   0   57.84    0.99
  -4   2   0   58.78    1.07
  -4   2   0   60.06    1.02
   3  -2   0  554.88    9.06
   3  -2   0  498.39    8.92
   3  -2   0  521.27    8.91
   3  -2   0  538.51   10.76
  -3   2   0  530.36   10.42
  -3   2   0  558.26    8.94
  -3   2   0  586.69    9.11
  -3   2   0  515.58    9.20
  -3   2   0  543.29    8.98
   2  -2   0   71.08    1.19
   2  -2   0   70.03    1.17
   2  -2   0   69.17    1.18
   2  -2   0   68.20    1.16
  -2   2   0   68.92    1.16
  -2   2   0   70.63    1.17
  -2   2   0   69.45    1.17
  -2   2   0   69.77    1.18
   1  -2   0   29.88    0.52
   1  -2   0   30.51    0.53
  -1   2   0   28.81    0.53
  -1   2   0   29.34    0.51
   0  -2   0   76.06    1.25
   0  -2   0   77.75    1.30
   0  -2   0   74.00    1.29
   0  -2   0   71.59    1.23
  -1  -2   0    1.57    0.06
  -1  -2   0    1.58    0.06
  -1  -2   0    1.63    0.07
  -1  -2   0    1.50    0.07
   1   2   0    1.49    0.05
   1   2   0    1.48    0.07
  -2  -2   0   20.00    0.38
  -2  -2   0   19.97    0.35
  -2  -2   0   19.70    0.37
  -2  -2   0   19.55    0.35
   2   2   0   18.57    0.34
   2   2   0   19.15    0.34
   2   2   0   20.21    0.38
   2   2   0   20.15    0.38
  -3  -2   0   10.08    0.19
  -3  -2   0   10.05    0.25
  -3  -2   0   10.03    0.25
  -3  -2   0    9.62    0.26
  -3  -2   0   10.10    0.19
   3   2   0    9.61    0.19
   3   2   0    9.98    0.18
  -4  -2   0    0.84    0.05
  -4  -2   0    0.86    0.10
  -4  -2   0    0.96    0.10
  -4  -2   0    0.87    0.09
  -4  -2   0    0.92    0.05
   4   2   0    0.88    0.04
   4   2   0    0.89    0.04
  -5  -2   0    0.29    0.03
  -5  -2   0    0.30    0.04
  -5  -2   0    0.24    0.09
  -5  -2   0    0.18    0.08
  -5  -2   0    0.18    0.08
   5   2   0    0.25    0.03
   5   2   0    0.25    0.03
  -6  -2   0   11.73    0.36
  -6  -2   0   11.41    0.35
  -6  -2   0   11.36    0.22
  -6  -2   0   11.83    0.23
  -6  -2   0   11.67    0.36
  -7  -2   0    1.12    0.07
  -7  -2   0    1.15    0.15
  -7  -2   0    1.29    0.07
  -7  -2   0    0.95    0.13
  -7  -2   0    1.02    0.14
  -8  -2   0    0.60    0.06
  -8  -2   0    0.57    0.05
  -8  -2   0    0.58    0.13
  -8  -2   0    0.60    0.12
  -9  -2   0   14.79    0.30
  -9  -2   0   14.71    0.30
  -9  -2   0   15.46    0.49
  -9  -2   0   15.43    0.49
 -10  -2   0    2.23    0.10
 -10  -2   0    2.09    0.10
 -10  -2   0    1.87    0.21
 -10  -2   0    1.90    0.20
 -11  -2   0    0.47    0.06
 -11  -2   0    0.45    0.15
 -11  -2   0    0.47    0.17
 -12  -2   0    0.41    0.16
 -12  -2   0    0.60    0.18
 -12  -2   0    0.59    0.06
 -12  -2   0    0.52    0.06
 -13  -2   0   18.15    0.63
 -13  -2   0   18.63    0.65
 -13  -2   0   17.98    0.34
 -14  -2   0    4.44    0.35
 -14  -2   0    5.25    0.41
 -15  -2   0    2.48    0.31
 -15  -2   0    3.27    0.34
 -16  -2   0    0.47    0.21
 -16  -2   0    0.50    0.22
 -16  -2   0    0.53    0.23
 -17  -2   0    0.24    0.21
 -17  -2   0    0.07    0.19
 -17   3   0   -0.13    0.09
 -17   3   0   -0.07    0.21
 -17   3   0   -0.19    0.20
 -16   3   0    2.89    0.21
 -16   3   0    3.02    0.35
 -16   3   0    3.25    0.38
 -15   3   0    0.16    0.20
 -15   3   0   -0.24    0.19
 -15   3   0    0.15    0.10
 -14   3   0    6.34    0.27
 -14   3   0    6.38    0.43
 -14   3   0    5.94    0.42
 -13   3   0    7.80    0.44
 -13   3   0    8.79    0.46
 -13   3   0    8.63    0.31
  12  -3   0    0.32    0.09
 -12   3   0    0.31    0.18
 -12   3   0    0.26    0.10
 -12   3   0    0.19    0.16
 -12   3   0    0.27    0.11
 -11   3   0    5.18    0.24
 -11   3   0    5.32    0.34
 -11   3   0    5.94    0.26
 -11   3   0    6.04    0.26
 -11   3   0    5.67    0.35
 -10   3   0    9.38    0.41
 -10   3   0    9.20    0.40
 -10   3   0    8.98    0.30
 -10   3   0    9.08    0.30
 -10   3   0    9.16    0.31
   9  -3   0   13.39    0.35
  -9   3   0   14.13    0.48
  -9   3   0   14.00    0.37
  -9   3   0   14.63    0.48
  -9   3   0   13.81    0.38
  -9   3   0   13.99    0.37
   8  -3   0    9.07    0.29
   8  -3   0    9.62    0.28
  -8   3   0    9.30    0.27
  -8   3   0    9.33    0.29
  -8   3   0    9.67    0.38
  -8   3   0    9.43    0.37
  -8   3   0    9.59    0.30
   7  -3   0   17.75    0.42
   7  -3   0   17.63    0.40
   7  -3   0   17.25    0.50
  -7   3   0   17.63    0.49
  -7   3   0   17.26    0.42
  -7   3   0   17.20    0.49
  -7   3   0   17.55    0.42
  -7   3   0   17.23    0.48
  -7   3   0   17.53    0.39
   6  -3   0    7.96    0.31
   6  -3   0    7.88    0.24
   6  -3   0    8.12    0.25
  -6   3   0    8.18    0.25
  -6   3   0    8.05    0.25
  -6   3   0    8.11    0.30
  -6   3   0    8.29    0.31
  -6   3   0    7.74    0.21
   5  -3   0    0.07    0.08
   5  -3   0    0.02    0.06
   5  -3   0    0.15    0.06
  -5   3   0    0.04    0.07
  -5   3   0    0.07    0.08
  -5   3   0    0.14    0.07
  -5   3   0    0.03    0.04
  -5   3   0    0.04    0.09
   4  -3   0   44.11    0.81
   4  -3   0   43.78    0.85
   4  -3   0   43.83    0.76
   4  -3   0   43.84    0.80
  -4   3   0   44.53    0.74
  -4   3   0   44.56    0.85
  -4   3   0   43.80    0.81
  -4   3   0   43.25    0.83
  -4   3   0   43.51    0.81
   3  -3   0    0.56    0.09
   3  -3   0    0.41    0.08
   3  -3   0    0.47    0.08
   3  -3   0    0.37    0.05
  -3   3   0    0.67    0.07
  -3   3   0    0.70    0.10
  -3   3   0    0.52    0.08
  -3   3   0    0.54    0.09
  -3   3   0    0.40    0.08
   2  -3   0   16.36    0.35
   2  -3   0   16.20    0.35
   2  -3   0   16.39    0.31
   2  -3   0   15.18    0.34
  -2   3   0   16.07    0.31
  -2   3   0   16.04    0.35
  -2   3   0   15.96    0.35
  -2   3   0   16.49    0.34
   1  -3   0   32.96    0.62
   1  -3   0   34.43    0.59
   1  -3   0   33.88    0.62
   1  -3   0   33.49    0.61
  -1   3   0   33.89    0.61
  -1   3   0   33.48    0.62
  -1   3   0   33.47    0.62
  -1   3   0   33.74    0.59
   0  -3   0   10.28    0.26
   0  -3   0   11.19    0.25
   0  -3   0   10.95    0.21
   0  -3   0   10.50    0.24
   0   3   0   10.93    0.21
   0   3   0   11.11    0.25
   0   3   0   10.61    0.25
   0   3   0   10.59    0.19
  -1  -3   0   94.28    1.66
  -1  -3   0   97.36    1.60
  -1  -3   0   97.84    1.64
  -1  -3   0   95.56    1.60
   1   3   0   93.67    1.59
   1   3   0  100.86    1.62
   1   3   0  100.93    1.65
   1   3   0   93.38    1.59
  -2  -3   0   91.97    1.62
  -2  -3   0   98.32    1.72
  -2  -3   0   99.18    1.63
  -2  -3   0  102.40    1.76
   2   3   0   98.57    1.62
   2   3   0   99.82    1.63
   2   3   0  101.48    1.63
  -3  -3   0   82.27    1.37
  -3  -3   0   80.79    1.37
  -3  -3   0   78.98    1.36
  -3  -3   0   80.73    1.32
   3   3   0   80.01    1.31
   3   3   0   80.41    1.36
   3   3   0   79.06    1.31
  -4  -3   0    6.54    0.22
  -4  -3   0    6.20    0.21
  -4  -3   0    6.42    0.15
  -4  -3   0    6.45    0.15
  -4  -3   0    6.26    0.21
   4   3   0    6.52    0.14
   4   3   0    6.16    0.14
  -5  -3   0    0.36    0.09
  -5  -3   0    0.29    0.04
  -5  -3   0    0.26    0.04
  -5  -3   0    0.33    0.09
  -5  -3   0    0.21    0.08
   5   3   0    0.31    0.03
   5   3   0    0.32    0.03
  -6  -3   0   22.23    0.53
  -6  -3   0   22.08    0.52
  -6  -3   0   21.82    0.54
  -6  -3   0   21.80    0.39
  -6  -3   0   22.47    0.40
  -7  -3   0    2.33    0.20
  -7  -3   0    2.56    0.20
  -7  -3   0    2.43    0.08
  -7  -3   0    2.47    0.09
  -7  -3   0    2.26    0.20
  -8  -3   0    0.08    0.09
  -8  -3   0   -0.16    0.09
  -8  -3   0    0.04    0.03
  -8  -3   0    0.09    0.04
  -9  -3   0    5.26    0.13
  -9  -3   0    5.82    0.29
  -9  -3   0    5.26    0.13
  -9  -3   0    5.06    0.28
 -10  -3   0    0.55    0.14
 -10  -3   0    0.69    0.05
 -10  -3   0    0.71    0.16
 -11  -3   0    0.09    0.13
 -11  -3   0    0.31    0.17
 -12  -3   0    0.46    0.17
 -12  -3   0    0.50    0.17
 -13  -3   0    2.57    0.28
 -13  -3   0    2.56    0.27
 -14  -3   0   -0.14    0.16
 -14  -3   0    0.07    0.16
 -15  -3   0    0.28    0.21
 -15  -3   0    0.44    0.21
 -15  -3   0    0.34    0.18
 -16  -3   0    0.43    0.21
 -16  -3   0    0.30    0.20
 -16  -3   0    0.15    0.19
 -17   4   0    3.08    0.40
 -17   4   0    2.99    0.36
 -17   4   0    3.09    0.24
 -16   4   0    0.89    0.15
 -16   4   0    0.91    0.25
 -16   4   0    0.22    0.21
 -15   4   0    0.66    0.14
 -15   4   0    0.84    0.24
 -15   4   0    1.11    0.26
 -14   4   0    1.37    0.17
 -14   4   0    1.63    0.26
 -14   4   0    1.42    0.26
 -13   4   0    0.06    0.17
 -13   4   0    0.08    0.11
 -13   4   0    0.02    0.16
 -12   4   0    4.90    0.38
 -12   4   0    4.62    0.25
 -12   4   0    4.35    0.34
 -12   4   0    4.96    0.22
  11  -4   0    1.95    0.16
 -11   4   0    1.86    0.23
 -11   4   0    1.75    0.18
 -11   4   0    1.62    0.16
 -11   4   0    2.15    0.15
 -11   4   0    1.74    0.23
  10  -4   0    1.01    0.12
 -10   4   0    1.23    0.14
 -10   4   0    1.26    0.13
 -10   4   0    1.12    0.19
 -10   4   0    1.10    0.14
 -10   4   0    0.96    0.18
   9  -4   0    2.97    0.18
  -9   4   0    2.76    0.20
  -9   4   0    2.83    0.24
  -9   4   0    3.06    0.27
  -9   4   0    2.88    0.20
  -9   4   0    3.00    0.15
   8  -4   0    4.37    0.20
  -8   4   0    4.33    0.27
  -8   4   0    4.50    0.23
  -8   4   0    4.30    0.17
  -8   4   0    4.28    0.22
  -8   4   0    4.60    0.27
   7  -4   0    7.73    0.28
   7  -4   0    7.59    0.26
   7  -4   0    7.57    0.33
  -7   4   0    7.31    0.27
  -7   4   0    7.74    0.32
  -7   4   0    7.89    0.32
  -7   4   0    7.46    0.20
  -7   4   0    7.53    0.28
   6  -4   0   14.38    0.43
   6  -4   0   13.89    0.37
   6  -4   0   13.52    0.35
  -6   4   0   13.85    0.41
  -6   4   0   13.90    0.37
  -6   4   0   13.79    0.29
  -6   4   0   13.69    0.37
  -6   4   0   13.87    0.40
   5  -4   0   94.91    1.66
   5  -4   0   95.28    1.73
   5  -4   0   98.48    1.72
   5  -4   0   95.12    1.68
  -5   4   0   98.70    1.68
  -5   4   0   96.63    1.70
  -5   4   0   96.59    1.58
  -5   4   0   98.14    1.72
  -5   4   0   94.49    1.67
   4  -4   0   34.91    0.63
   4  -4   0   34.69    0.69
   4  -4   0   36.94    0.74
   4  -4   0   36.62    0.71
  -4   4   0   37.01    0.63
  -4   4   0   36.34    0.71
  -4   4   0   35.79    0.72
  -4   4   0   35.93    0.71
  -4   4   0   35.89    0.71
   3  -4   0    5.76    0.21
   3  -4   0    5.73    0.20
   3  -4   0    5.63    0.21
   3  -4   0    5.65    0.15
  -3   4   0    5.39    0.21
  -3   4   0    5.80    0.20
  -3   4   0    5.95    0.16
  -3   4   0    5.94    0.19
  -3   4   0    5.78    0.21
   2  -4   0  917.94   18.38
   2  -4   0  939.31   15.39
   2  -4   0 1000.00   21.06
   2  -4   0  912.56   15.48
  -2   4   0  983.47   15.45
  -2   4   0  902.83   15.32
  -2   4   0  853.35   15.41
  -2   4   0  937.93   15.25
   1  -4   0   13.62    0.32
   1  -4   0   12.15    0.31
   1  -4   0   13.05    0.32
   1  -4   0   13.21    0.28
  -1   4   0   13.16    0.27
  -1   4   0   12.48    0.32
  -1   4   0   13.18    0.32
   0  -4   0   10.69    0.27
   0  -4   0   10.09    0.27
   0  -4   0   10.63    0.30
   0  -4   0   10.73    0.22
   0   4   0   10.13    0.20
   0   4   0   10.24    0.27
   0   4   0   10.99    0.27
   0   4   0   10.90    0.22
  -1  -4   0   65.14    1.45
  -1  -4   0   63.24    1.10
  -1  -4   0   64.73    1.10
  -1  -4   0   61.00    1.10
  -1  -4   0   62.98    1.04
   1   4   0   63.51    1.10
   1   4   0   65.12    1.04
   1   4   0   64.09    1.10
   1   4   0   63.00    1.07
  -2  -4   0   78.43    1.33
  -2  -4   0   77.09    1.36
  -2  -4   0   78.34    1.31
  -2  -4   0   80.20    1.32
   2   4   0   78.84    1.30
   2   4   0   77.94    1.31
   2   4   0   78.55    1.32
  -3  -4   0   31.51    0.58
  -3  -4   0   30.89    0.59
  -3  -4   0   31.97    0.57
  -3  -4   0   31.19    0.57
   3   4   0   29.21    0.56
   3   4   0   31.11    0.56
   3   4   0   31.48    0.59
  -4  -4   0   19.60    0.38
  -4  -4   0   19.85    0.43
  -4  -4   0   19.91    0.43
  -4  -4   0   19.56    0.44
  -4  -4   0   19.87    0.38
   4   4   0   19.50    0.37
   4   4   0   19.33    0.37
  -5  -4   0   10.61    0.23
  -5  -4   0   10.79    0.32
  -5  -4   0   10.45    0.23
  -5  -4   0   10.64    0.30
  -5  -4   0   10.94    0.31
   5   4   0   10.73    0.22
   5   4   0   10.81    0.21
  -6  -4   0  108.52    1.90
  -6  -4   0  108.29    1.77
  -6  -4   0  107.87    1.77
  -6  -4   0  108.59    1.91
  -6  -4   0  110.23    1.92
  -7  -4   0    0.32    0.11
  -7  -4   0    0.44    0.05
  -7  -4   0    0.51    0.13
  -7  -4   0    0.41    0.11
  -7  -4   0    0.44    0.04
  -8  -4   0    0.35    0.04
  -8  -4   0    0.40    0.04
  -8  -4   0    0.16    0.11
  -8  -4   0    0.14    0.10
  -9  -4   0    6.91    0.32
  -9  -4   0    7.27    0.33
 -10  -4   0    2.51    0.22
 -10  -4   0    2.31    0.24
 -11  -4   0    0.24    0.16
 -11  -4   0    0.28    0.13
 -12  -4   0    2.04    0.23
 -12  -4   0    2.06    0.25
 -13  -4   0    1.20    0.22
 -13  -4   0    1.11    0.21
 -14  -4   0    1.76    0.27
 -14  -4   0    0.89    0.22
 -15  -4   0    0.33    0.20
 -15  -4   0    0.08    0.18
 -15  -4   0    0.04    0.16
 -16  -4   0    1.19    0.27
 -16  -4   0    1.18    0.25
 -16  -4   0    1.36    0.28
 -17   5   0    0.45    0.25
 -17   5   0    1.01    0.30
 -17   5   0    0.89    0.16
 -16   5   0    1.34    0.27
 -16   5   0    1.51    0.28
 -16   5   0    1.15    0.17
 -15   5   0    0.70    0.24
 -15   5   0    0.97    0.16
 -15   5   0    0.78    0.24
 -14   5   0    0.90    0.16
 -14   5   0    0.79    0.23
 -14   5   0    0.88    0.23
 -13   5   0    0.51    0.14
 -13   5   0    0.51    0.20
 -13   5   0    0.61    0.21
  12  -5   0    4.93    0.25
 -12   5   0    4.88    0.36
 -12   5   0    4.59    0.26
 -12   5   0    4.96    0.36
 -12   5   0    5.06    0.21
  11  -5   0    0.25    0.10
 -11   5   0   -0.05    0.13
 -11   5   0    0.16    0.07
 -11   5   0   -0.03    0.10
 -11   5   0    0.13    0.15
 -11   5   0   -0.03    0.10
  10  -5   0    1.66    0.16
 -10   5   0    1.77    0.18
 -10   5   0    1.50    0.21
 -10   5   0    1.75    0.17
 -10   5   0    1.86    0.13
 -10   5   0    1.08    0.18
   9  -5   0    4.93    0.23
  -9   5   0    5.17    0.31
  -9   5   0    5.18    0.26
  -9   5   0    5.70    0.31
  -9   5   0    5.18    0.25
  -9   5   0    5.05    0.18
   8  -5   0   29.09    0.64
  -8   5   0   28.84    0.65
  -8   5   0   29.40    0.66
  -8   5   0   29.65    0.73
  -8   5   0   28.57    0.72
  -8   5   0   28.31    0.55
   7  -5   0   16.29    0.50
   7  -5   0   17.02    0.45
   7  -5   0   16.54    0.43
  -7   5   0   16.20    0.47
  -7   5   0   16.48    0.34
  -7   5   0   16.64    0.49
  -7   5   0   16.99    0.45
  -7   5   0   16.71    0.44
   6  -5   0    0.42    0.12
   6  -5   0    0.57    0.07
   6  -5   0    0.63    0.12
   6  -5   0    0.52    0.11
  -6   5   0    0.60    0.12
  -6   5   0    0.59    0.07
  -6   5   0    0.53    0.12
  -6   5   0    0.54    0.13
  -6   5   0    0.54    0.11
   5  -5   0   24.98    0.57
   5  -5   0   26.62    0.60
   5  -5   0   25.11    0.47
   5  -5   0   24.51    0.55
  -5   5   0   24.90    0.58
  -5   5   0   25.35    0.57
  -5   5   0   25.11    0.47
  -5   5   0   24.83    0.56
  -5   5   0   26.23    0.57
   4  -5   0   47.96    0.92
   4  -5   0   48.53    0.94
   4  -5   0   50.77    0.95
   4  -5   0   48.18    0.84
  -4   5   0   48.45    0.85
  -4   5   0   47.79    0.93
  -4   5   0   47.74    0.93
  -4   5   0   49.20    0.91
  -4   5   0   49.15    0.93
   3  -5   0    2.11    0.15
   3  -5   0    1.94    0.15
   3  -5   0    2.12    0.16
   3  -5   0    2.04    0.11
  -3   5   0    2.23    0.16
  -3   5   0    2.25    0.13
  -3   5   0    2.17    0.12
  -3   5   0    2.14    0.13
  -3   5   0    2.27    0.17
   2  -5   0    3.92    0.19
   2  -5   0    4.08    0.19
   2  -5   0    3.88    0.16
   2  -5   0    3.90    0.16
  -2   5   0    4.13    0.16
  -2   5   0    3.95    0.17
  -2   5   0    4.26    0.20
  -2   5   0    3.92    0.18
   1  -5   0   67.76    1.22
   1  -5   0   70.14    1.23
   1  -5   0   69.80    1.17
   1  -5   0   69.90    1.23
  -1   5   0   68.73    1.16
  -1   5   0   67.48    1.22
   0  -5   0    0.41    0.08
   0  -5   0    0.40    0.09
   0  -5   0    0.44    0.05
   0  -5   0    0.40    0.09
   0   5   0    0.35    0.04
   0   5   0    0.43    0.08
   0   5   0    0.49    0.05
   0   5   0    0.46    0.09
  -1  -5   0  130.75    2.20
  -1  -5   0  135.87    2.22
  -1  -5   0  129.77    2.08
  -1  -5   0  126.06    2.14
  -1  -5   0  122.66    2.13
   1   5   0  128.51    2.07
   1   5   0  124.55    2.15
   1   5   0  128.86    2.14
   1   5   0  124.76    2.13
  -2  -5   0   25.45    0.46
  -2  -5   0   25.38    0.47
  -2  -5   0   25.72    0.51
  -2  -5   0   25.48    0.46
   2   5   0   24.91    0.47
   2   5   0   24.97    0.50
   2   5   0   25.89    0.51
  -3  -5   0   10.47    0.27
  -3  -5   0   10.42    0.26
  -3  -5   0   10.84    0.25
   3   5   0   10.85    0.26
   3   5   0   10.70    0.26
  -4  -5   0   20.19    0.43
  -4  -5   0   18.82    0.43
  -4  -5   0   19.86    0.40
  -4  -5   0   19.50    0.40
   4   5   0   19.18    0.39
   4   5   0   19.44    0.39
   4   5   0   19.48    0.43
  -5  -5   0   11.25    0.26
  -5  -5   0   11.42    0.33
  -5  -5   0   11.85    0.32
  -5  -5   0   11.03    0.31
  -5  -5   0   11.24    0.26
   5   5   0   11.24    0.24
   5   5   0   11.17    0.25
  -6  -5   0    1.39    0.14
  -6  -5   0    1.45    0.09
  -6  -5   0    1.46    0.09
  -6  -5   0    1.84    0.17
  -6  -5   0    1.20    0.13
   6   5   0    1.49    0.07
   6   5   0    1.47    0.07
  -7  -5   0   11.98    0.39
  -7  -5   0   12.16    0.25
  -7  -5   0   12.02    0.37
  -7  -5   0   12.03    0.37
  -8  -5   0    1.34    0.15
  -8  -5   0    1.75    0.18
  -8  -5   0    1.61    0.07
  -9  -5   0    1.28    0.16
  -9  -5   0    1.71    0.19
 -10  -5   0    9.91    0.39
 -10  -5   0    9.61    0.39
 -11  -5   0    3.77    0.29
 -11  -5   0    4.07    0.29
 -12  -5   0    4.36    0.31
 -12  -5   0    4.92    0.33
 -13  -5   0    0.74    0.19
 -13  -5   0    0.68    0.19
 -14  -5   0    4.52    0.36
 -14  -5   0    4.29    0.37
 -14  -5   0    4.05    0.38
 -15  -5   0    0.56    0.20
 -15  -5   0    0.33    0.21
 -15  -5   0    0.25    0.17
 -16  -5   0    0.96    0.27
 -16  -5   0    0.92    0.25
 -16  -5   0    0.53    0.21
 -17   6   0    0.00    0.13
 -17   6   0    0.04    0.24
 -17   6   0   -0.26    0.19
 -16   6   0    0.62    0.24
 -16   6   0    0.98    0.28
 -16   6   0    0.60    0.16
 -15   6   0    0.95    0.17
 -15   6   0    0.97    0.25
 -15   6   0    0.79    0.23
 -14   6   0   -0.44    0.16
 -14   6   0    0.03    0.12
 -14   6   0    0.02    0.19
 -13   6   0    0.83    0.23
 -13   6   0    0.85    0.16
 -13   6   0    0.44    0.20
  12  -6   0    8.50    0.33
 -12   6   0    8.10    0.26
 -12   6   0    8.39    0.44
 -12   6   0    8.35    0.46
 -12   6   0    7.92    0.35
  11  -6   0    2.51    0.21
 -11   6   0    2.57    0.27
 -11   6   0    3.04    0.24
 -11   6   0    2.04    0.24
 -11   6   0    2.36    0.16
  10  -6   0    0.19    0.10
 -10   6   0    0.23    0.14
 -10   6   0    0.13    0.12
 -10   6   0    0.08    0.13
 -10   6   0    0.17    0.11
 -10   6   0    0.16    0.07
   9  -6   0    3.92    0.23
  -9   6   0    3.51    0.27
  -9   6   0    2.81    0.14
  -9   6   0    3.27    0.26
  -9   6   0    3.84    0.24
  -9   6   0    3.53    0.24
   8  -6   0   13.70    0.40
  -8   6   0   14.24    0.47
  -8   6   0   13.75    0.42
  -8   6   0   13.98    0.30
  -8   6   0   13.97    0.43
   7  -6   0    7.16    0.39
   7  -6   0    6.85    0.28
  -7   6   0    7.44    0.33
  -7   6   0    6.90    0.19
  -7   6   0    7.34    0.30
  -7   6   0    7.12    0.31
  -7   6   0    6.71    0.29
   6  -6   0   64.28    1.21
   6  -6   0   62.46    1.24
   6  -6   0   60.85    1.18
   6  -6   0   62.71    1.08
  -6   6   0   63.15    1.07
  -6   6   0   60.64    1.19
  -6   6   0   63.20    1.23
  -6   6   0   62.66    1.20
  -6   6   0   63.64    1.20
   5  -6   0    1.32    0.15
   5  -6   0    1.57    0.16
   5  -6   0    1.63    0.16
   5  -6   0    1.41    0.11
  -5   6   0    1.50    0.16
  -5   6   0    1.34    0.14
  -5   6   0    1.48    0.11
  -5   6   0    1.62    0.15
  -5   6   0    1.81    0.17
   4  -6   0  108.97    1.93
   4  -6   0  110.55    1.94
   4  -6   0  109.95    1.84
   4  -6   0  109.94    1.95
  -4   6   0  112.71    1.94
  -4   6   0  112.22    1.87
  -4   6   0  108.82    1.89
  -4   6   0  113.40    1.93
  -4   6   0  110.88    1.94
   3  -6   0    4.36    0.17
   3  -6   0    4.48    0.21
   3  -6   0    4.73    0.23
   3  -6   0    4.48    0.19
  -3   6   0    4.29    0.19
  -3   6   0    4.50    0.21
  -3   6   0    4.55    0.22
  -3   6   0    4.48    0.16
  -3   6   0    4.40    0.18
   2  -6   0   17.93    0.44
   2  -6   0   18.03    0.42
   2  -6   0   17.90    0.40
   2  -6   0   18.26    0.44
  -2   6   0   18.03    0.39
  -2   6   0   17.79    0.36
  -2   6   0   18.12    0.44
   1  -6   0   48.30    0.93
   1  -6   0   47.59    0.92
   1  -6   0   47.28    0.84
   1  -6   0   48.35    0.91
  -1   6   0   46.64    0.81
  -1   6   0   47.29    0.91
  -1   6   0   48.13    0.91
  -1   6   0   46.81    0.83
   0  -6   0    7.79    0.26
   0  -6   0    7.64    0.19
   0  -6   0    7.71    0.28
   0  -6   0    7.62    0.25
   0   6   0    7.72    0.17
   0   6   0    7.96    0.26
   0   6   0    7.56    0.25
   0   6   0    7.52    0.19
  -1  -6   0    7.49    0.17
  -1  -6   0    7.25    0.16
  -1  -6   0    7.59    0.25
  -1  -6   0    7.03    0.24
  -1  -6   0    7.30    0.30
   1   6   0    7.91    0.25
   1   6   0    7.42    0.24
   1   6   0    7.19    0.16
  -2  -6   0   17.17    0.39
  -2  -6   0   17.31    0.33
  -2  -6   0   17.02    0.33
  -2  -6   0   16.58    0.40
  -2  -6   0   17.06    0.33
   2   6   0   16.78    0.33
   2   6   0   16.67    0.39
   2   6   0   16.42    0.39
  -3  -6   0    2.38    0.14
  -3  -6   0    2.33    0.12
  -3  -6   0    2.38    0.15
  -3  -6   0    2.32    0.11
   3   6   0    1.94    0.13
   3   6   0    1.65    0.11
   3   6   0    2.26    0.12
  -4  -6   0    0.07    0.06
  -4  -6   0   -0.04    0.07
  -4  -6   0    0.02    0.06
   4   6   0   -0.03    0.06
   4   6   0    0.06    0.06
   4   6   0    0.01    0.05
  -5  -6   0    0.64    0.10
  -5  -6   0    0.80    0.10
  -5  -6   0    0.84    0.12
  -5  -6   0    0.76    0.09
   5   6   0    0.67    0.08
   5   6   0    0.82    0.08
  -6  -6   0    1.27    0.13
  -6  -6   0    1.44    0.11
  -6  -6   0    1.97    0.18
  -6  -6   0    1.53    0.14
   6   6   0    1.34    0.09
   6   6   0    1.59    0.09
  -7  -6   0    1.17    0.09
  -7  -6   0    1.04    0.13
  -7  -6   0    1.33    0.14
  -7  -6   0    1.20    0.16
   7   6   0    1.21    0.06
   7   6   0    1.12    0.06
  -8  -6   0   10.64    0.23
  -8  -6   0   10.72    0.23
  -8  -6   0   10.44    0.36
  -8  -6   0   10.42    0.36
  -9  -6   0    1.04    0.06
  -9  -6   0    0.99    0.15
  -9  -6   0    0.92    0.15
 -10  -6   0    0.13    0.13
 -10  -6   0    0.05    0.12
 -11  -6   0    6.13    0.34
 -11  -6   0    5.97    0.34
 -12  -6   0    5.14    0.34
 -12  -6   0    4.66    0.34
 -13  -6   0    0.17    0.16
 -13  -6   0    0.03    0.19
 -13  -6   0   -0.08    0.14
 -14  -6   0    0.04    0.20
 -14  -6   0    0.08    0.18
 -14  -6   0   -0.02    0.16
 -15  -6   0    1.42    0.24
 -15  -6   0    1.52    0.31
 -15  -6   0    1.13    0.25
 -17   7   0   -0.14    0.21
 -17   7   0   -0.03    0.21
 -17   7   0    0.16    0.14
 -16   7   0    0.00    0.19
 -16   7   0    0.16    0.15
 -16   7   0   -0.04    0.20
 -15   7   0    1.58    0.30
 -15   7   0    1.76    0.22
 -15   7   0    1.64    0.28
 -14   7   0    0.44    0.21
 -14   7   0    0.77    0.23
 -14   7   0    0.77    0.17
 -13   7   0    0.95    0.18
 -13   7   0    1.03    0.23
 -13   7   0    0.78    0.21
  12  -7   0    1.47    0.18
 -12   7   0    0.98    0.15
 -12   7   0    1.13    0.23
 -12   7   0    1.26    0.18
 -12   7   0    1.18    0.23
  11  -7   0    4.55    0.27
 -11   7   0    4.51    0.29
 -11   7   0    4.15    0.33
 -11   7   0    4.21    0.33
 -11   7   0    4.20    0.16
  10  -7   0    0.26    0.12
 -10   7   0    0.20    0.12
 -10   7   0    0.29    0.13
 -10   7   0    0.02    0.14
 -10   7   0   -0.04    0.12
   9  -7   0    8.33    0.33
  -9   7   0    9.08    0.39
  -9   7   0    9.18    0.41
  -9   7   0    9.22    0.37
  -9   7   0    9.06    0.23
  -9   7   0    8.73    0.35
   8  -7   0   10.19    0.36
  -8   7   0    9.99    0.25
  -8   7   0   10.11    0.40
  -8   7   0    9.80    0.37
  -8   7   0    9.85    0.38
   7  -7   0    0.44    0.12
   7  -7   0    0.38    0.07
  -7   7   0    0.47    0.14
  -7   7   0    0.37    0.07
  -7   7   0    0.31    0.12
  -7   7   0    0.21    0.12
  -7   7   0    0.39    0.12
   6  -7   0    2.27    0.21
   6  -7   0    2.52    0.21
   6  -7   0    2.23    0.19
   6  -7   0    2.14    0.12
  -6   7   0    2.32    0.20
  -6   7   0    2.39    0.20
  -6   7   0    2.06    0.19
  -6   7   0    2.15    0.19
  -6   7   0    2.29    0.13
   5  -7   0   11.81    0.38
   5  -7   0   11.81    0.39
   5  -7   0   10.97    0.28
   5  -7   0   11.27    0.37
  -5   7   0   11.28    0.38
  -5   7   0   11.33    0.30
  -5   7   0   11.32    0.37
  -5   7   0   11.57    0.38
  -5   7   0   11.67    0.34
   4  -7   0    0.41    0.08
   4  -7   0    0.31    0.11
   4  -7   0    0.39    0.11
   4  -7   0    0.31    0.10
  -4   7   0    0.27    0.11
  -4   7   0    0.53    0.13
  -4   7   0    0.36    0.09
  -4   7   0    0.25    0.09
  -4   7   0    0.40    0.10
   3  -7   0    2.97    0.17
   3  -7   0    3.01    0.21
   3  -7   0    2.99    0.20
   3  -7   0    3.14    0.17
  -3   7   0    2.80    0.14
  -3   7   0    2.95    0.20
  -3   7   0    2.82    0.16
   2  -7   0   43.85    0.87
   2  -7   0   44.26    0.88
   2  -7   0   44.79    0.90
   2  -7   0   45.06    0.83
  -2   7   0   43.14    0.89
  -2   7   0   44.11    0.77
  -2   7   0   44.73    0.82
   1  -7   0    2.01    0.17
   1  -7   0    1.46    0.14
   1  -7   0    1.57    0.11
   1  -7   0    1.60    0.15
  -1   7   0    1.50    0.15
  -1   7   0    1.53    0.11
  -1   7   0    1.36    0.14
  -1   7   0    1.46    0.07
  -1   7   0    1.52    0.09
   0  -7   0   38.09    0.78
   0  -7   0   37.35    0.68
   0  -7   0   38.87    0.83
   0  -7   0   36.58    0.76
   0   7   0   38.25    0.77
   0   7   0   38.13    0.68
   0   7   0   38.37    0.65
   0   7   0   37.09    0.76
  -1  -7   0    3.20    0.19
  -1  -7   0    3.45    0.11
  -1  -7   0    3.09    0.18
  -1  -7   0    3.28    0.11
  -1  -7   0    3.29    0.23
   1   7   0    3.32    0.19
   1   7   0    3.25    0.10
   1   7   0    3.05    0.18
  -2  -7   0    3.05    0.24
  -2  -7   0    2.92    0.11
  -2  -7   0    2.57    0.17
  -2  -7   0    2.75    0.18
  -2  -7   0    2.85    0.11
  -2  -7   0    2.71    0.10
   2   7   0    3.07    0.12
   2   7   0    2.83    0.17
   2   7   0    2.61    0.17
  -3  -7   0    8.83    0.28
  -3  -7   0    9.17    0.23
  -3  -7   0    8.91    0.21
  -3  -7   0    8.40    0.27
  -3  -7   0    9.39    0.23
   3   7   0    8.66    0.27
   3   7   0    8.99    0.23
   3   7   0    8.61    0.27
  -4  -7   0    1.67    0.14
  -4  -7   0    1.43    0.13
  -4  -7   0    1.67    0.13
  -4  -7   0    1.61    0.12
   4   7   0    1.60    0.13
   4   7   0    1.49    0.13
  -5  -7   0   16.51    0.40
  -5  -7   0   15.90    0.38
  -5  -7   0   16.50    0.41
  -5  -7   0   16.43    0.39
  -5  -7   0   16.36    0.39
   5   7   0   15.49    0.36
   5   7   0   16.36    0.37
  -6  -7   0    2.85    0.15
  -6  -7   0    3.31    0.20
  -6  -7   0    3.27    0.19
  -6  -7   0    3.11    0.15
  -6  -7   0    2.97    0.18
   6   7   0    3.09    0.13
   6   7   0    2.98    0.13
  -7  -7   0    0.48    0.13
  -7  -7   0    0.39    0.10
  -7  -7   0    0.65    0.08
  -7  -7   0    0.48    0.11
  -7  -7   0    0.58    0.08
   7   7   0    0.69    0.06
   7   7   0    0.51    0.06
  -8  -7   0    4.26    0.24
  -8  -7   0    4.35    0.15
  -8  -7   0    4.29    0.15
  -8  -7   0    4.32    0.24
  -9  -7   0    0.34    0.05
  -9  -7   0    0.26    0.05
  -9  -7   0    0.34    0.13
  -9  -7   0    0.25    0.12
 -10  -7   0    1.21    0.19
 -10  -7   0    1.19    0.17
 -11  -7   0    3.52    0.29
 -11  -7   0    3.55    0.28
 -12  -7   0    2.18    0.25
 -12  -7   0    2.69    0.36
 -12  -7   0    2.22    0.24
 -13  -7   0    0.24    0.16
 -13  -7   0    0.31    0.16
 -13  -7   0    0.55    0.22
 -14  -7   0    4.20    0.36
 -14  -7   0    3.73    0.33
 -14  -7   0    4.51    0.44
 -15  -7   0    0.79    0.21
 -15  -7   0    0.90    0.22
 -15  -7   0    1.24    0.29
 -17   8   0   -0.03    0.15
 -17   8   0   -0.02    0.22
 -17   8   0    0.21    0.25
 -16   8   0    0.04    0.21
 -16   8   0    0.06    0.15
 -16   8   0    0.13    0.22
 -15   8   0   -0.12    0.19
 -15   8   0    0.09    0.15
 -15   8   0    0.08    0.20
 -14   8   0    0.09    0.14
 -14   8   0    0.15    0.19
 -14   8   0    0.26    0.21
 -13   8   0    1.44    0.20
 -13   8   0    1.96    0.30
 -13   8   0    1.39    0.25
  12  -8   0    7.69    0.35
 -12   8   0    7.02    0.43
 -12   8   0    8.03    0.44
 -12   8   0    7.40    0.37
  11  -8   0    4.71    0.29
 -11   8   0    4.64    0.35
 -11   8   0    4.16    0.15
 -11   8   0    4.54    0.34
 -11   8   0    4.45    0.30
  10  -8   0    1.95    0.20
 -10   8   0    2.04    0.12
 -10   8   0    2.10    0.25
 -10   8   0    1.79    0.23
 -10   8   0    1.77    0.21
   9  -8   0    0.05    0.11
  -9   8   0    0.11    0.13
  -9   8   0    0.10    0.06
  -9   8   0    0.10    0.13
  -9   8   0    0.06    0.13
   8  -8   0    1.99    0.20
   8  -8   0    2.12    0.13
  -8   8   0    1.56    0.19
  -8   8   0    1.84    0.20
  -8   8   0    2.02    0.13
  -8   8   0    2.32    0.23
   7  -8   0   14.92    0.34
   7  -8   0   15.06    0.45
  -7   8   0   14.91    0.47
  -7   8   0   15.18    0.36
  -7   8   0   15.44    0.48
  -7   8   0   14.95    0.45
  -7   8   0   14.73    0.47
   6  -8   0    3.38    0.16
   6  -8   0    3.80    0.25
   6  -8   0    3.62    0.24
  -6   8   0    2.83    0.23
  -6   8   0    3.25    0.25
  -6   8   0    3.36    0.17
  -6   8   0    3.43    0.23
  -6   8   0    3.65    0.21
   5  -8   0    0.60    0.14
   5  -8   0    0.45    0.09
   5  -8   0    0.36    0.11
   5  -8   0    0.59    0.14
  -5   8   0    0.66    0.12
  -5   8   0    0.38    0.13
  -5   8   0    0.56    0.12
  -5   8   0    0.48    0.10
  -5   8   0    0.50    0.14
   4  -8   0   12.61    0.40
   4  -8   0   12.14    0.37
   4  -8   0   11.87    0.33
   4  -8   0   12.13    0.40
  -4   8   0   11.48    0.36
  -4   8   0   12.15    0.40
  -4   8   0   12.48    0.33
   3  -8   0   26.52    0.64
   3  -8   0   26.79    0.63
   3  -8   0   27.09    0.59
   3  -8   0   26.91    0.58
  -3   8   0   26.09    0.52
  -3   8   0   24.92    0.62
  -3   8   0   25.22    0.56
   2  -8   0    6.82    0.28
   2  -8   0    6.57    0.29
   2  -8   0    7.28    0.24
   2  -8   0    6.39    0.28
  -2   8   0    7.02    0.29
  -2   8   0    6.80    0.18
  -2   8   0    7.22    0.23
  -2   8   0    6.26    0.29
   1  -8   0   48.45    1.01
   1  -8   0   49.80    1.00
   1  -8   0   50.93    0.91
   1  -8   0   47.60    0.98
  -1   8   0   50.35    0.85
  -1   8   0   47.79    0.81
  -1   8   0   49.16    0.99
  -1   8   0   50.98    0.89
  -1   8   0   51.19    0.99
   0  -8   0    1.91    0.20
   0  -8   0    1.92    0.16
   0  -8   0    2.33    0.19
   0  -8   0    1.85    0.11
   0   8   0    2.10    0.13
   0   8   0    2.12    0.18
   0   8   0    1.91    0.17
   0   8   0    2.13    0.10
  -1  -8   0    9.88    0.32
  -1  -8   0    9.82    0.33
  -1  -8   0    9.86    0.39
  -1  -8   0   10.29    0.23
  -1  -8   0    9.62    0.21
   1   8   0    9.92    0.32
   1   8   0   10.36    0.21
   1   8   0   10.15    0.33
  -2  -8   0   39.68    0.94
  -2  -8   0   40.69    0.71
  -2  -8   0   40.58    0.69
  -2  -8   0   39.54    0.83
  -2  -8   0   41.54    0.82
  -2  -8   0   41.86    0.72
   2   8   0   41.07    0.72
   2   8   0   40.51    0.82
   2   8   0   42.29    0.83
  -3  -8   0    5.12    0.16
  -3  -8   0    4.92    0.22
  -3  -8   0    5.08    0.16
  -3  -8   0    4.93    0.32
  -3  -8   0    4.77    0.23
  -3  -8   0    5.08    0.16
   3   8   0    5.06    0.17
   3   8   0    4.77    0.22
   3   8   0    5.26    0.22
  -4  -8   0   23.24    0.47
  -4  -8   0   22.78    0.45
  -4  -8   0   22.72    0.52
  -4  -8   0   22.24    0.48
  -4  -8   0   21.71    0.50
   4   8   0   22.96    0.51
   4   8   0   22.87    0.48
  -5  -8   0    0.52    0.10
  -5  -8   0    0.76    0.11
  -5  -8   0    0.74    0.11
  -5  -8   0    0.69    0.10
   5   8   0    0.71    0.09
   5   8   0    0.69    0.10
  -6  -8   0    3.87    0.18
  -6  -8   0    3.74    0.21
  -6  -8   0    3.43    0.19
  -6  -8   0    3.55    0.17
  -6  -8   0    3.65    0.19
   6   8   0    3.29    0.23
   6   8   0    3.88    0.16
  -7  -8   0    1.35    0.16
  -7  -8   0    1.21    0.11
  -7  -8   0    1.11    0.13
  -7  -8   0    1.11    0.11
  -7  -8   0    0.93    0.13
   7   8   0    1.13    0.10
  -8  -8   0    0.19    0.11
  -8  -8   0    0.06    0.10
  -8  -8   0    0.11    0.06
  -8  -8   0    0.10    0.06
   8   8   0    0.16    0.04
   8   8   0    0.07    0.04
  -9  -8   0   18.19    0.38
  -9  -8   0   18.81    0.53
  -9  -8   0   18.41    0.53
  -9  -8   0   18.38    0.37
 -10  -8   0   -0.02    0.03
 -10  -8   0   -0.01    0.12
 -10  -8   0   -0.13    0.12
 -11  -8   0    0.10    0.14
 -11  -8   0   -0.14    0.12
 -11  -8   0    0.12    0.21
 -12  -8   0   -0.07    0.18
 -12  -8   0   -0.11    0.13
 -12  -8   0   -0.10    0.14
 -13  -8   0    4.18    0.34
 -13  -8   0    3.36    0.31
 -13  -8   0    4.28    0.44
 -14  -8   0    0.18    0.18
 -14  -8   0    0.13    0.22
 -15  -8   0    0.90    0.28
 -15  -8   0    0.69    0.22
 -16   9   0    1.84    0.31
 -16   9   0    1.26    0.28
 -16   9   0    1.69    0.24
 -15   9   0    0.06    0.20
 -15   9   0    0.07    0.16
 -15   9   0    0.28    0.21
 -14   9   0   -0.10    0.14
 -14   9   0   -0.10    0.18
 -14   9   0    0.13    0.22
 -13   9   0    3.40    0.34
 -13   9   0    3.55    0.32
 -13   9   0    4.03    0.36
  12  -9   0   10.66    0.43
 -12   9   0   11.18    0.46
 -12   9   0   11.21    0.51
 -12   9   0   10.92    0.51
  11  -9   0    0.82    0.17
 -11   9   0    0.77    0.20
 -11   9   0    0.80    0.08
 -11   9   0    0.93    0.21
 -11   9   0    0.70    0.17
  10  -9   0    0.60    0.15
 -10   9   0    0.49    0.17
 -10   9   0    0.41    0.17
 -10   9   0    0.61    0.17
 -10   9   0    0.54    0.08
   9  -9   0   -0.04    0.12
  -9   9   0    0.01    0.13
  -9   9   0    0.06    0.14
  -9   9   0   -0.11    0.13
  -9   9   0    0.00    0.06
   8  -9   0    3.82    0.16
   8  -9   0    3.46    0.26
  -8   9   0    3.53    0.17
  -8   9   0    3.24    0.28
  -8   9   0    3.67    0.27
   7  -9   0    1.02    0.10
   7  -9   0    0.81    0.15
  -7   9   0    0.81    0.15
  -7   9   0    0.92    0.14
  -7   9   0    0.95    0.11
  -7   9   0    0.93    0.18
   6  -9   0    0.47    0.14
   6  -9   0    0.43    0.09
  -6   9   0    0.58    0.12
  -6   9   0    0.57    0.15
  -6   9   0    0.40    0.12
   5  -9   0    0.52    0.15
   5  -9   0    0.63    0.17
   5  -9   0    0.51    0.12
   5  -9   0    0.52    0.10
  -5   9   0    0.34    0.11
  -5   9   0    0.48    0.11
  -5   9   0    0.42    0.15
   4  -9   0    3.10    0.21
   4  -9   0    2.99    0.19
   4  -9   0    3.11    0.24
   4  -9   0    3.32    0.25
  -4   9   0    3.31    0.17
  -4   9   0    3.44    0.19
  -4   9   0    2.75    0.25
   3  -9   0   11.78    0.35
   3  -9   0   11.32    0.39
   3  -9   0   11.33    0.36
   3  -9   0   11.19    0.40
  -3   9   0   11.61    0.28
  -3   9   0   11.04    0.40
  -3   9   0   11.21    0.39
  -3   9   0   11.40    0.32
   2  -9   0   26.39    0.64
   2  -9   0   27.20    0.65
   2  -9   0   26.53    0.66
   2  -9   0   26.94    0.58
  -2   9   0   27.76    0.56
  -2   9   0   27.36    0.66
  -2   9   0   26.62    0.49
  -2   9   0   27.26    0.65
  -2   9   0   25.34    0.52
   1  -9   0   18.24    0.50
   1  -9   0   20.05    0.53
   1  -9   0   19.48    0.43
   1  -9   0   18.60    0.53
  -1   9   0   19.24    0.38
  -1   9   0   19.17    0.51
  -1   9   0   19.37    0.52
  -1   9   0   19.88    0.42
   0  -9   0    0.67    0.13
   0  -9   0    0.91    0.09
   0  -9   0    0.91    0.16
   0  -9   0    1.01    0.15
   0   9   0    0.87    0.14
   0   9   0    0.97    0.08
   0   9   0    0.80    0.14
   0   9   0    0.83    0.09
  -1  -9   0    0.07    0.05
  -1  -9   0    0.01    0.10
  -1  -9   0    0.11    0.12
  -1  -9   0   -0.02    0.10
   1   9   0    0.04    0.10
   1   9   0    0.10    0.04
   1   9   0   -0.04    0.09
  -2  -9   0    1.54    0.16
  -2  -9   0    1.12    0.14
  -2  -9   0    1.40    0.09
  -2  -9   0    1.51    0.09
  -2  -9   0    1.43    0.20
   2   9   0    1.71    0.09
   2   9   0    1.46    0.15
  -3  -9   0    1.32    0.20
  -3  -9   0    1.60    0.16
  -3  -9   0    1.56    0.10
  -3  -9   0    1.26    0.10
  -3  -9   0    1.49    0.15
  -3  -9   0    1.40    0.11
   3   9   0    1.55    0.11
   3   9   0    1.55    0.15
  -4  -9   0    4.11    0.22
  -4  -9   0    3.96    0.15
  -4  -9   0    4.03    0.21
  -4  -9   0    3.80    0.16
  -4  -9   0    4.02    0.17
  -4  -9   0    4.09    0.32
   4   9   0    4.13    0.20
  -5  -9   0   10.02    0.29
  -5  -9   0   10.25    0.28
  -5  -9   0    9.90    0.31
  -5  -9   0    9.05    0.46
  -5  -9   0   10.10    0.32
  -6  -9   0    0.20    0.08
  -6  -9   0    0.30    0.17
  -6  -9   0    0.22    0.08
  -6  -9   0    0.23    0.10
  -6  -9   0    0.25    0.08
  -6  -9   0    0.06    0.08
   6   9   0    0.27    0.07
  -7  -9   0    7.26    0.25
  -7  -9   0    7.64    0.29
  -7  -9   0    7.31    0.25
  -7  -9   0    7.17    0.45
  -7  -9   0    7.51    0.30
  -7  -9   0    7.25    0.29
   7   9   0    7.59    0.22
  -8  -9   0    3.62    0.17
  -8  -9   0    3.37    0.36
  -8  -9   0    3.62    0.23
  -8  -9   0    3.42    0.23
  -8  -9   0    3.28    0.17
   8   9   0    3.40    0.13
  -9  -9   0    4.25    0.26
  -9  -9   0    4.38    0.43
  -9  -9   0    3.92    0.26
  -9  -9   0    4.03    0.16
  -9  -9   0    3.96    0.16
 -10  -9   0   12.25    0.63
 -10  -9   0   11.90    0.26
 -10  -9   0   11.86    0.43
 -10  -9   0   11.19    0.26
 -10  -9   0   12.31    0.44
 -11  -9   0   -0.07    0.12
 -11  -9   0   -0.07    0.13
 -11  -9   0   -0.11    0.21
 -12  -9   0    1.57    0.22
 -12  -9   0    1.51    0.31
 -12  -9   0    1.45    0.21
 -13  -9   0    0.49    0.24
 -13  -9   0    0.23    0.17
 -14  -9   0    0.17    0.23
 -14  -9   0    0.02    0.18
 -16  10   0   -0.29    0.22
 -16  10   0    0.19    0.21
 -16  10   0   -0.09    0.16
 -15  10   0    0.06    0.17
 -15  10   0    0.33    0.24
 -15  10   0    0.15    0.21
 -14  10   0    0.03    0.20
 -14  10   0    0.21    0.20
 -14  10   0    0.22    0.18
 -13  10   0    1.21    0.23
 -13  10   0    1.21    0.24
 -13  10   0    1.45    0.26
  12 -10   0   -0.27    0.13
 -12  10   0   -0.09    0.16
 -12  10   0   -0.11    0.16
 -12  10   0    0.02    0.16
  11 -10   0   -0.06    0.15
 -11  10   0   -0.04    0.15
 -11  10   0    0.06    0.16
 -11  10   0    0.04    0.19
 -11  10   0   -0.20    0.15
  10 -10   0    6.46    0.35
 -10  10   0    6.21    0.36
 -10  10   0    5.75    0.36
 -10  10   0    6.45    0.38
 -10  10   0    6.38    0.38
   9 -10   0    0.05    0.14
   9 -10   0    0.11    0.07
  -9  10   0    0.09    0.13
  -9  10   0   -0.03    0.14
  -9  10   0    0.05    0.14
   8 -10   0    1.96    0.14
   8 -10   0    1.41    0.19
  -8  10   0    1.46    0.19
  -8  10   0    1.72    0.21
   7 -10   0    1.53    0.15
   7 -10   0    1.31    0.20
  -7  10   0    2.00    0.24
  -7  10   0    1.52    0.18
  -7  10   0    1.38    0.18
   6 -10   0    1.70    0.16
   6 -10   0    1.93    0.22
  -6  10   0    1.73    0.18
  -6  10   0    2.17    0.18
  -6  10   0    1.69    0.21
   5 -10   0    8.81    0.34
   5 -10   0    8.89    0.37
   5 -10   0    8.74    0.29
  -5  10   0    8.57    0.29
  -5  10   0    8.65    0.37
  -5  10   0    9.24    0.34
  -5  10   0    9.55    0.39
   4 -10   0   28.04    0.64
   4 -10   0   28.99    0.67
   4 -10   0   28.73    0.73
   4 -10   0   28.51    0.70
  -4  10   0   27.97    0.72
  -4  10   0   27.98    0.58
  -4  10   0   29.09    0.64
  -4  10   0   28.90    0.71
   3 -10   0    0.29    0.14
   3 -10   0    0.37    0.10
   3 -10   0    0.35    0.14
   3 -10   0    0.54    0.12
  -3  10   0    0.31    0.07
  -3  10   0    0.27    0.14
  -3  10   0    0.56    0.17
  -3  10   0    0.34    0.10
   2 -10   0   13.96    0.37
   2 -10   0   13.42    0.43
   2 -10   0   13.17    0.44
   2 -10   0   13.60    0.45
  -2  10   0   14.39    0.45
  -2  10   0   13.50    0.28
  -2  10   0   14.12    0.35
  -2  10   0   13.74    0.32
   1 -10   0    2.61    0.16
   1 -10   0    2.48    0.21
   1 -10   0    2.73    0.23
   1 -10   0    2.35    0.22
  -1  10   0    2.36    0.15
  -1  10   0    2.40    0.12
  -1  10   0    2.59    0.23
   0 -10   0    0.43    0.16
   0 -10   0    0.30    0.12
   0 -10   0    0.47    0.14
   0 -10   0    0.36    0.07
   0  10   0    0.35    0.06
   0  10   0    0.41    0.08
   0  10   0    0.66    0.14
  -1 -10   0    0.02    0.13
  -1 -10   0    0.06    0.05
  -1 -10   0    0.05    0.11
  -1 -10   0    0.18    0.11
   1  10   0    0.06    0.04
   1  10   0    0.20    0.11
  -2 -10   0    1.68    0.10
  -2 -10   0    1.60    0.18
  -2 -10   0    1.91    0.24
  -2 -10   0    1.97    0.10
  -2 -10   0    1.88    0.18
   2  10   0    1.66    0.10
   2  10   0    1.69    0.17
  -3 -10   0    5.91    0.16
  -3 -10   0    5.96    0.18
  -3 -10   0    6.06    0.38
  -3 -10   0    5.67    0.26
  -3 -10   0    5.83    0.17
  -3 -10   0    6.15    0.28
   3  10   0    5.81    0.18
   3  10   0    5.79    0.26
  -4 -10   0    2.37    0.13
  -4 -10   0    2.11    0.19
  -4 -10   0    2.16    0.18
  -4 -10   0    2.04    0.13
  -4 -10   0    1.80    0.12
  -4 -10   0    1.69    0.24
   4  10   0    2.20    0.18
  -5 -10   0    1.46    0.12
  -5 -10   0    1.23    0.12
  -5 -10   0    1.39    0.24
  -5 -10   0    1.34    0.14
  -5 -10   0    1.46    0.13
  -5 -10   0    1.18    0.14
  -6 -10   0   -0.03    0.07
  -6 -10   0   -0.01    0.08
  -6 -10   0    0.06    0.09
  -6 -10   0    0.06    0.06
  -6 -10   0    0.14    0.08
  -6 -10   0   -0.04    0.16
  -6 -10   0   -0.10    0.08
   6  10   0    0.02    0.07
  -7 -10   0    4.42    0.21
  -7 -10   0    4.37    0.22
  -7 -10   0    4.54    0.23
  -7 -10   0    4.72    0.23
  -7 -10   0    4.03    0.38
  -7 -10   0    4.51    0.24
   7  10   0    4.29    0.18
  -8 -10   0    0.15    0.20
  -8 -10   0    0.15    0.09
  -8 -10   0    0.34    0.09
  -8 -10   0    0.12    0.11
  -8 -10   0    0.32    0.11
   8  10   0    0.27    0.09
  -9 -10   0    0.15    0.11
  -9 -10   0    0.05    0.07
  -9 -10   0    0.11    0.22
  -9 -10   0    0.01    0.12
  -9 -10   0    0.10    0.07
 -10 -10   0    7.64    0.35
 -10 -10   0    7.27    0.34
 -10 -10   0    7.41    0.51
 -10 -10   0    7.58    0.21
 -11 -10   0    0.43    0.23
 -11 -10   0    0.25    0.15
 -11 -10   0    0.02    0.12
 -12 -10   0   -0.03    0.22
 -12 -10   0    0.03    0.15
 -13 -10   0    0.50    0.25
 -13 -10   0    0.98    0.22
 -14 -10   0    0.42    0.26
 -14 -10   0    0.45    0.20
 -16  11   0    0.42    0.24
 -16  11   0   -0.06    0.21
 -16  11   0    0.28    0.20
 -15  11   0    0.15    0.21
 -15  11   0   -0.01    0.22
 -15  11   0   -0.10    0.18
 -14  11   0   -0.05    0.17
 -14  11   0    0.00    0.23
 -14  11   0   -0.19    0.18
 -13  11   0    1.98    0.29
 -13  11   0    2.18    0.28
 -13  11   0    1.96    0.29
  12 -11   0    4.54    0.35
 -12  11   0    4.76    0.38
 -12  11   0    3.72    0.35
 -12  11   0    5.39    0.39
  11 -11   0    1.08    0.22
 -11  11   0    0.99    0.22
 -11  11   0    0.78    0.21
 -11  11   0    0.87    0.22
  10 -11   0    3.46    0.31
 -10  11   0    3.13    0.31
 -10  11   0    3.55    0.32
 -10  11   0    3.61    0.33
   9 -11   0    0.66    0.10
   9 -11   0    0.59    0.18
  -9  11   0    0.78    0.20
  -9  11   0    0.65    0.17
  -9  11   0    0.36    0.15
   8 -11   0    0.25    0.08
   8 -11   0    0.17    0.15
  -8  11   0   -0.02    0.15
  -8  11   0    0.26    0.14
   7 -11   0    1.45    0.15
   7 -11   0    1.59    0.22
  -7  11   0    1.39    0.19
  -7  11   0    1.52    0.22
  -7  11   0    1.67    0.19
   6 -11   0    0.69    0.12
   6 -11   0    0.71    0.17
  -6  11   0    0.97    0.20
  -6  11   0    0.85    0.15
  -6  11   0    0.78    0.13
   5 -11   0    6.69    0.28
   5 -11   0    7.27    0.39
   5 -11   0    6.67    0.34
  -5  11   0    6.90    0.30
  -5  11   0    6.81    0.26
  -5  11   0    6.70    0.36
   4 -11   0    2.21    0.19
   4 -11   0    1.81    0.18
   4 -11   0    2.10    0.23
  -4  11   0    1.56    0.20
  -4  11   0    1.99    0.18
  -4  11   0    2.06    0.14
   3 -11   0    3.38    0.24
   3 -11   0    3.42    0.27
   3 -11   0    3.78    0.22
   3 -11   0    3.90    0.28
  -3  11   0    3.66    0.20
  -3  11   0    3.54    0.17
  -3  11   0    3.55    0.28
  -3  11   0    3.57    0.15
   2 -11   0    2.20    0.22
   2 -11   0    2.68    0.18
   2 -11   0    2.94    0.25
   2 -11   0    2.88    0.26
  -2  11   0    2.61    0.09
  -2  11   0    2.81    0.14
  -2  11   0    2.80    0.25
  -2  11   0    2.75    0.17
   1 -11   0    5.59    0.22
   1 -11   0    5.51    0.30
   1 -11   0    5.96    0.33
   1 -11   0    5.28    0.30
  -1  11   0    5.41    0.21
  -1  11   0    6.01    0.31
  -1  11   0    5.49    0.17
   0 -11   0   19.55    0.61
   0 -11   0   19.89    0.44
   0 -11   0   20.55    0.58
   0 -11   0   20.23    0.55
   0  11   0   19.76    0.38
   0  11   0   20.11    0.44
   0  11   0   21.20    0.57
  -1 -11   0   17.39    0.38
  -1 -11   0   16.90    0.51
  -1 -11   0   16.86    0.58
  -1 -11   0   16.96    0.49
   1  11   0   17.72    0.50
   1  11   0   17.28    0.33
  -2 -11   0   21.86    0.70
  -2 -11   0   21.70    0.44
  -2 -11   0   22.00    0.59
  -2 -11   0   22.06    0.57
   2  11   0   21.77    0.57
   2  11   0   22.10    0.42
  -3 -11   0   22.98    0.60
  -3 -11   0   22.87    0.45
  -3 -11   0   23.17    0.58
  -3 -11   0   23.20    0.45
  -3 -11   0   23.56    0.75
   3  11   0   23.02    0.58
   3  11   0   22.65    0.46
  -4 -11   0    0.39    0.07
  -4 -11   0    0.21    0.06
  -4 -11   0    0.37    0.08
  -4 -11   0    0.28    0.12
  -4 -11   0    0.26    0.12
  -4 -11   0    0.51    0.19
   4  11   0    0.38    0.11
  -5 -11   0    0.05    0.08
  -5 -11   0    0.19    0.11
  -5 -11   0    0.07    0.09
  -5 -11   0    0.08    0.10
  -5 -11   0   -0.10    0.06
  -5 -11   0   -0.02    0.19
   5  11   0    0.06    0.09
  -6 -11   0    0.60    0.09
  -6 -11   0    0.56    0.12
  -6 -11   0    0.41    0.22
  -6 -11   0    0.72    0.13
  -6 -11   0    0.68    0.12
  -6 -11   0    0.69    0.12
  -6 -11   0    0.46    0.10
   6  11   0    0.62    0.11
  -7 -11   0    4.94    0.25
  -7 -11   0    4.78    0.23
  -7 -11   0    4.26    0.24
  -7 -11   0    4.69    0.24
  -7 -11   0    4.05    0.23
  -7 -11   0    4.46    0.41
  -7 -11   0    5.19    0.20
   7  11   0    4.43    0.30
  -8 -11   0    0.38    0.11
  -8 -11   0    0.53    0.11
  -8 -11   0    0.27    0.22
  -8 -11   0    0.23    0.12
  -9 -11   0    3.31    0.19
  -9 -11   0    3.72    0.43
  -9 -11   0    3.25    0.25
  -9 -11   0    3.71    0.24
 -10 -11   0   -0.02    0.07
 -10 -11   0   -0.20    0.12
 -10 -11   0    0.15    0.22
 -11 -11   0    1.17    0.20
 -11 -11   0    1.14    0.29
 -11 -11   0    1.15    0.08
 -12 -11   0   -0.14    0.15
 -12 -11   0   -0.07    0.21
 -13 -11   0   -0.10    0.24
 -15  12   0    0.19    0.22
 -15  12   0    0.45    0.21
 -15  12   0    0.27    0.22
 -14  12   0    0.13    0.23
 -14  12   0   -0.25    0.20
 -14  12   0    0.08    0.18
 -13  12   0    0.10    0.18
 -13  12   0   -0.07    0.18
 -13  12   0   -0.07    0.19
  12 -12   0    1.13    0.22
 -12  12   0    1.20    0.26
 -12  12   0    1.21    0.23
 -12  12   0    1.18    0.26
  11 -12   0    0.11    0.18
 -11  12   0    0.11    0.17
 -11  12   0    0.38    0.19
 -11  12   0    0.04    0.17
  10 -12   0    1.05    0.22
  10 -12   0    1.26    0.14
 -10  12   0    1.47    0.23
 -10  12   0    1.15    0.21
 -10  12   0    1.51    0.25
   9 -12   0    0.29    0.09
   9 -12   0    0.33    0.17
  -9  12   0   -0.04    0.15
  -9  12   0    0.05    0.17
  -9  12   0    0.19    0.15
   8 -12   0    8.74    0.29
   8 -12   0    9.06    0.43
  -8  12   0    8.39    0.45
  -8  12   0    8.26    0.39
   7 -12   0   -0.03    0.11
   7 -12   0    0.18    0.17
  -7  12   0    0.05    0.12
  -7  12   0    0.13    0.12
  -7  12   0    0.14    0.17
   6 -12   0    4.94    0.25
   6 -12   0    6.21    0.35
  -6  12   0    5.94    0.37
  -6  12   0    5.60    0.26
  -6  12   0    6.07    0.31
   5 -12   0   -0.09    0.11
   5 -12   0    0.50    0.17
  -5  12   0    0.44    0.18
  -5  12   0    0.35    0.10
  -5  12   0    0.23    0.12
   4 -12   0    0.00    0.10
   4 -12   0    0.33    0.13
   4 -12   0    0.37    0.15
  -4  12   0    0.13    0.14
  -4  12   0    0.22    0.11
  -4  12   0    0.14    0.08
   3 -12   0   10.97    0.43
   3 -12   0   10.23    0.50
   3 -12   0   10.74    0.36
   3 -12   0   11.03    0.41
  -3  12   0   10.48    0.29
  -3  12   0   11.06    0.35
  -3  12   0   10.99    0.44
  -3  12   0   10.71    0.26
   2 -12   0   14.22    0.50
   2 -12   0   13.45    0.49
   2 -12   0   14.18    0.49
   2 -12   0   14.12    0.40
  -2  12   0   14.39    0.33
  -2  12   0   13.94    0.38
  -2  12   0   14.28    0.49
   1 -12   0   15.03    0.51
   1 -12   0   14.93    0.53
   1 -12   0   14.30    0.38
   1 -12   0   14.48    0.48
  -1  12   0   14.16    0.31
  -1  12   0   13.88    0.48
  -1  12   0   14.46    0.38
   0 -12   0    3.41    0.17
   0 -12   0    3.39    0.27
   0 -12   0    3.62    0.27
   0 -12   0    3.43    0.29
   0  12   0    3.31    0.12
   0  12   0    3.51    0.18
   0  12   0    3.10    0.26
  -1 -12   0    2.64    0.24
  -1 -12   0    2.10    0.26
  -1 -12   0    2.37    0.14
  -1 -12   0    3.18    0.26
   1  12   0    2.18    0.21
   1  12   0    2.31    0.10
  -2 -12   0    0.00    0.11
  -2 -12   0   -0.01    0.16
  -2 -12   0   -0.06    0.05
  -2 -12   0    0.11    0.12
   2  12   0    0.02    0.05
   2  12   0    0.11    0.12
  -3 -12   0    2.95    0.13
  -3 -12   0    2.98    0.13
  -3 -12   0    3.07    0.32
  -3 -12   0    2.90    0.24
  -3 -12   0    2.88    0.25
   3  12   0    3.25    0.24
  -4 -12   0    1.45    0.18
  -4 -12   0    1.13    0.09
  -4 -12   0    0.90    0.23
  -4 -12   0    1.04    0.16
  -4 -12   0    1.11    0.09
  -4 -12   0    1.39    0.11
   4  12   0    1.31    0.16
  -5 -12   0    0.32    0.13
  -5 -12   0    0.55    0.09
  -5 -12   0    0.53    0.24
  -5 -12   0    0.57    0.10
  -5 -12   0    0.23    0.07
  -5 -12   0    0.38    0.14
   5  12   0    0.58    0.13
  -6 -12   0    8.00    0.27
  -6 -12   0    7.74    0.32
  -6 -12   0    7.89    0.50
  -6 -12   0    7.67    0.28
  -6 -12   0    7.81    0.33
  -6 -12   0    8.14    0.27
  -6 -12   0    7.48    0.24
  -7 -12   0    6.61    0.26
  -7 -12   0    6.61    0.28
  -7 -12   0    6.27    0.27
  -7 -12   0    6.95    0.49
  -8 -12   0    0.23    0.11
  -8 -12   0    0.20    0.10
  -8 -12   0    0.23    0.23
  -8 -12   0   -0.17    0.11
  -9 -12   0    0.24    0.15
  -9 -12   0    0.13    0.25
  -9 -12   0    0.54    0.11
 -10 -12   0    0.04    0.21
 -10 -12   0    0.02    0.14
 -10 -12   0    0.17    0.08
 -11 -12   0    0.29    0.24
 -12 -12   0    0.66    0.28
 -15  13   0    1.16    0.28
 -15  13   0    1.16    0.28
 -15  13   0    1.21    0.26
 -14  13   0    2.06    0.30
 -14  13   0    1.90    0.30
 -14  13   0    1.43    0.28
 -13  13   0    0.54    0.23
 -13  13   0   -0.02    0.19
 -13  13   0    0.35    0.20
  12 -13   0    4.17    0.37
 -12  13   0    4.32    0.38
 -12  13   0    4.02    0.36
 -12  13   0    4.01    0.38
  11 -13   0    4.24    0.37
 -11  13   0    3.67    0.35
 -11  13   0    3.80    0.35
 -11  13   0    3.73    0.33
  10 -13   0    0.02    0.18
 -10  13   0   -0.15    0.15
 -10  13   0   -0.11    0.16
 -10  13   0    0.01    0.20
   9 -13   0    0.15    0.18
   9 -13   0    0.59    0.11
  -9  13   0    0.34    0.20
  -9  13   0    0.49    0.18
  -9  13   0    0.36    0.17
   8 -13   0    0.06    0.17
   8 -13   0   -0.02    0.12
  -8  13   0    0.15    0.15
  -8  13   0    0.13    0.19
   7 -13   0    8.13    0.32
   7 -13   0    7.73    0.42
  -7  13   0    7.58    0.36
  -7  13   0    8.42    0.44
  -7  13   0    7.56    0.32
   6 -13   0    8.64    0.43
   6 -13   0    8.31    0.34
  -6  13   0    8.23    0.43
  -6  13   0    8.05    0.36
  -6  13   0    8.04    0.30
   5 -13   0    0.79    0.19
   5 -13   0    0.48    0.15
  -5  13   0    0.88    0.22
  -5  13   0    0.81    0.12
  -5  13   0    0.51    0.13
   4 -13   0    0.12    0.13
   4 -13   0    0.04    0.11
   4 -13   0    0.09    0.15
  -4  13   0    0.17    0.08
  -4  13   0   -0.10    0.15
  -4  13   0    0.06    0.11
  -4  13   0    0.22    0.09
   3 -13   0    2.81    0.22
   3 -13   0    3.02    0.28
   3 -13   0    3.06    0.27
  -3  13   0    3.18    0.16
  -3  13   0    2.78    0.11
  -3  13   0    2.81    0.27
  -3  13   0    2.74    0.21
   2 -13   0    1.12    0.21
   2 -13   0    0.90    0.13
   2 -13   0    0.97    0.19
   2 -13   0    1.09    0.20
  -2  13   0    0.95    0.19
  -2  13   0    1.09    0.10
  -2  13   0    0.77    0.13
   1 -13   0    0.30    0.15
   1 -13   0    0.31    0.15
   1 -13   0    0.36    0.16
   1 -13   0    0.11    0.09
  -1  13   0    0.16    0.07
  -1  13   0    0.37    0.15
  -1  13   0    0.17    0.10
   0 -13   0    0.36    0.09
   0 -13   0    0.40    0.15
   0 -13   0    0.38    0.18
   0 -13   0    0.66    0.17
   0  13   0    0.35    0.05
   0  13   0    0.34    0.09
   0  13   0    0.58    0.16
  -1 -13   0    7.73    0.37
  -1 -13   0    8.54    0.44
  -1 -13   0    7.72    0.25
  -1 -13   0    8.29    0.39
   1  13   0    7.93    0.37
   1  13   0    8.15    0.18
  -2 -13   0    1.13    0.24
  -2 -13   0    0.98    0.18
  -2 -13   0    1.11    0.18
  -2 -13   0    0.86    0.09
   2  13   0    0.99    0.18
  -3 -13   0    1.31    0.18
  -3 -13   0    1.26    0.11
  -3 -13   0    1.43    0.26
  -3 -13   0    1.24    0.19
   3  13   0    1.49    0.19
  -4 -13   0    7.93    0.38
  -4 -13   0    8.43    0.36
  -4 -13   0    8.90    0.23
  -4 -13   0    8.32    0.52
  -4 -13   0    8.58    0.23
   4  13   0    8.72    0.36
  -5 -13   0   13.89    0.34
  -5 -13   0   14.45    0.67
  -5 -13   0   13.34    0.45
   5  13   0   13.53    0.49
  -6 -13   0    0.00    0.07
  -6 -13   0   -0.14    0.11
  -6 -13   0   -0.23    0.19
  -6 -13   0   -0.16    0.09
  -7 -13   0    2.41    0.36
  -7 -13   0    3.12    0.23
  -7 -13   0    2.46    0.21
  -8 -13   0    0.05    0.10
  -8 -13   0   -0.17    0.20
  -8 -13   0   -0.15    0.13
  -9 -13   0    7.35    0.54
  -9 -13   0    7.43    0.29
 -10 -13   0    6.78    0.54
 -10 -13   0    6.11    0.24
 -11 -13   0    2.79    0.15
 -11 -13   0    2.51    0.41
 -12 -13   0    2.29    0.43
 -14  14   0    0.15    0.23
 -14  14   0    0.42    0.22
 -14  14   0    0.50    0.23
 -13  14   0    2.68    0.34
 -13  14   0    2.36    0.31
 -13  14   0    2.81    0.33
  12 -14   0    0.70    0.23
 -12  14   0    0.76    0.22
 -12  14   0    0.60    0.23
 -12  14   0    0.77    0.25
  11 -14   0    0.37    0.20
 -11  14   0    0.07    0.18
 -11  14   0    0.18    0.20
 -11  14   0    0.34    0.21
  10 -14   0    0.06    0.18
 -10  14   0    0.30    0.18
 -10  14   0   -0.11    0.16
 -10  14   0    0.29    0.21
   9 -14   0    0.77    0.13
   9 -14   0    0.69    0.22
  -9  14   0    0.62    0.19
  -9  14   0    0.56    0.20
  -9  14   0    0.78    0.24
   8 -14   0    2.34    0.29
   8 -14   0    1.92    0.20
  -8  14   0    2.00    0.24
  -8  14   0    2.05    0.23
  -8  14   0    2.53    0.32
   7 -14   0    8.32    0.45
   7 -14   0    6.37    0.32
  -7  14   0    6.61    0.30
  -7  14   0    7.97    0.39
  -7  14   0    9.27    0.48
   6 -14   0   11.10    0.41
   6 -14   0   12.23    0.51
  -6  14   0   11.54    0.36
  -6  14   0   11.52    0.51
  -6  14   0   11.66    0.43
   5 -14   0    3.93    0.33
   5 -14   0    3.35    0.26
  -5  14   0    4.37    0.37
  -5  14   0    3.79    0.19
  -5  14   0    3.76    0.27
   4 -14   0    0.35    0.16
   4 -14   0    0.40    0.18
  -4  14   0    0.35    0.13
  -4  14   0    0.44    0.10
  -4  14   0    0.45    0.08
  -4  14   0    0.45    0.20
   3 -14   0    5.29    0.34
   3 -14   0    6.42    0.38
   3 -14   0    5.50    0.29
  -3  14   0    5.43    0.21
  -3  14   0    5.36    0.28
  -3  14   0    5.65    0.38
   2 -14   0    0.52    0.18
   2 -14   0    0.29    0.11
   2 -14   0    0.21    0.16
  -2  14   0    0.29    0.08
  -2  14   0    0.13    0.16
  -2  14   0    0.04    0.11
   1 -14   0    0.40    0.19
   1 -14   0    0.38    0.16
   1 -14   0    0.29    0.11
   1 -14   0    0.36    0.17
  -1  14   0    0.09    0.06
  -1  14   0    0.31    0.18
  -1  14   0    0.38    0.11
   0 -14   0    2.07    0.24
   0 -14   0    2.01    0.25
   0 -14   0    2.15    0.17
   0 -14   0    1.97    0.28
   0  14   0    2.46    0.26
   0  14   0    1.83    0.09
   0  14   0    2.16    0.17
  -1 -14   0   16.21    0.54
  -1 -14   0   15.76    0.64
  -1 -14   0   16.04    0.39
  -1 -14   0   16.13    0.56
   1  14   0   16.26    0.54
  -2 -14   0    4.48    0.32
  -2 -14   0    3.81    0.32
  -2 -14   0    4.21    0.40
  -2 -14   0    4.17    0.18
   2  14   0    4.50    0.31
  -3 -14   0   10.14    0.55
  -3 -14   0   10.08    0.28
  -3 -14   0   11.00    0.43
  -3 -14   0   10.25    0.45
   3  14   0   10.30    0.42
  -4 -14   0    0.53    0.24
  -4 -14   0    0.57    0.07
  -4 -14   0    0.50    0.16
   4  14   0    0.46    0.17
  -5 -14   0    1.77    0.31
  -5 -14   0    1.50    0.19
  -6 -14   0    0.60    0.15
  -6 -14   0    0.66    0.26
  -7 -14   0    2.13    0.20
  -7 -14   0    2.47    0.37
  -8 -14   0    1.55    0.33
  -8 -14   0    1.56    0.17
  -9 -14   0    3.42    0.23
  -9 -14   0    4.26    0.48
 -10 -14   0    0.42    0.11
 -10 -14   0    0.61    0.27
 -11 -14   0    1.08    0.13
 -11 -14   0    0.87    0.34
 -14  15   0   -0.03    0.20
 -14  15   0   -0.12    0.21
 -14  15   0    0.08    0.21
 -13  15   0   -0.05    0.20
 -13  15   0   -0.03    0.21
 -13  15   0   -0.11    0.19
  12 -15   0   -0.18    0.29
 -12  15   0    0.20    0.21
 -12  15   0    0.01    0.21
 -12  15   0    0.05    0.21
  11 -15   0    2.44    0.31
 -11  15   0    2.71    0.30
 -11  15   0    2.74    0.32
 -11  15   0    3.09    0.35
  10 -15   0   -0.15    0.18
 -10  15   0    0.15    0.15
 -10  15   0    0.02    0.17
 -10  15   0    0.04    0.19
   9 -15   0    4.41    0.39
  -9  15   0    3.53    0.32
  -9  15   0    3.48    0.35
  -9  15   0    3.78    0.32
   8 -15   0    5.81    0.32
   8 -15   0    6.34    0.41
  -8  15   0    7.24    0.47
  -8  15   0    6.75    0.35
  -8  15   0    6.52    0.38
   7 -15   0    3.82    0.29
   7 -15   0    4.23    0.38
  -7  15   0    4.60    0.40
  -7  15   0    4.62    0.30
  -7  15   0    3.95    0.32
   6 -15   0    1.29    0.24
   6 -15   0    1.04    0.19
  -6  15   0    1.30    0.20
  -6  15   0    0.83    0.23
   5 -15   0    1.21    0.20
   5 -15   0    1.33    0.24
  -5  15   0    1.26    0.14
  -5  15   0    1.25    0.18
  -5  15   0    1.42    0.27
   4 -15   0    0.13    0.18
   4 -15   0   -0.01    0.15
  -4  15   0    0.04    0.18
  -4  15   0   -0.07    0.12
  -4  15   0    0.20    0.09
   3 -15   0    4.41    0.28
   3 -15   0    4.60    0.35
   3 -15   0    4.16    0.34
  -3  15   0    4.34    0.26
  -3  15   0    4.89    0.37
  -3  15   0    4.88    0.20
   2 -15   0    0.15    0.18
   2 -15   0    0.00    0.16
   2 -15   0    0.02    0.10
  -2  15   0   -0.16    0.07
  -2  15   0   -0.08    0.16
  -2  15   0    0.02    0.12
   1 -15   0    1.54    0.23
   1 -15   0    1.43    0.16
   1 -15   0    1.32    0.26
  -1  15   0    1.43    0.15
  -1  15   0    1.29    0.11
  -1  15   0    1.40    0.22
   0 -15   0    0.07    0.09
   0 -15   0    0.25    0.18
   0 -15   0    0.10    0.15
   0 -15   0   -0.08    0.17
   0  15   0    0.11    0.16
  -1 -15   0    2.54    0.26
  -1 -15   0    2.99    0.30
  -1 -15   0    2.47    0.33
   1  15   0    2.91    0.28
  -2 -15   0   27.02    0.91
  -2 -15   0   27.53    0.75
   2  15   0   27.57    0.75
  -3 -15   0    1.12    0.26
  -3 -15   0    0.67    0.17
   3  15   0    1.03    0.28
  -4 -15   0    1.06    0.30
  -4 -15   0    1.02    0.18
  -5 -15   0    0.85    0.27
  -5 -15   0    0.83    0.17
  -6 -15   0    0.46    0.15
  -6 -15   0    0.30    0.25
  -7 -15   0    3.02    0.40
  -7 -15   0    3.06    0.26
  -8 -15   0    0.35    0.13
  -8 -15   0    0.04    0.23
  -9 -15   0    0.53    0.13
  -9 -15   0    0.47    0.27
 -10 -15   0   -0.25    0.25
 -10 -15   0   -0.17    0.09
 -13  16   0    1.11    0.26
 -13  16   0    1.06    0.27
 -13  16   0    0.99    0.27
 -12  16   0    0.57    0.25
 -12  16   0    0.78    0.23
 -12  16   0    0.72    0.25
  11 -16   0   -0.20    0.19
 -11  16   0   -0.09    0.22
 -11  16   0    0.36    0.19
 -11  16   0   -0.02    0.21
  10 -16   0    1.21    0.27
 -10  16   0    1.27    0.23
 -10  16   0    1.18    0.28
 -10  16   0    0.86    0.21
   9 -16   0    0.34    0.22
  -9  16   0    0.45    0.18
  -9  16   0    0.36    0.24
  -9  16   0    0.26    0.18
   8 -16   0   -0.41    0.17
   8 -16   0    0.31    0.20
  -8  16   0    0.02    0.17
  -8  16   0    0.25    0.22
  -8  16   0    0.18    0.15
   7 -16   0    1.25    0.21
   7 -16   0    1.63    0.29
  -7  16   0    1.56    0.22
  -7  16   0    1.35    0.19
  -7  16   0    2.24    0.32
   6 -16   0    3.46    0.35
   6 -16   0    3.05    0.30
  -6  16   0    3.56    0.26
  -6  16   0    3.91    0.37
  -6  16   0    3.37    0.30
   5 -16   0   -0.07    0.15
   5 -16   0    0.19    0.19
  -5  16   0   -0.08    0.18
  -5  16   0   -0.01    0.14
   4 -16   0    0.42    0.19
   4 -16   0    0.35    0.20
  -4  16   0    0.48    0.21
  -4  16   0    0.46    0.16
   3 -16   0   -0.07    0.18
   3 -16   0   -0.11    0.17
  -3  16   0    0.02    0.19
  -3  16   0   -0.06    0.14
   2 -16   0    6.39    0.42
   2 -16   0    7.05    0.43
  -2  16   0    6.11    0.30
  -2  16   0    7.49    0.43
   1 -16   0    3.85    0.35
   1 -16   0    3.97    0.36
  -1  16   0    3.99    0.36
  -1  16   0    3.91    0.23
   0 -16   0    0.38    0.21
   0 -16   0    0.46    0.18
   0  16   0    0.63    0.19
  -1 -16   0    0.50    0.19
  -1 -16   0    0.27    0.22
   1  16   0    0.60    0.19
  -2 -16   0    3.69    0.39
  -2 -16   0    4.74    0.35
  -3 -16   0    0.17    0.21
  -3 -16   0    0.15    0.16
  -4 -16   0    1.88    0.23
  -4 -16   0    2.69    0.38
  -5 -16   0    2.60    0.38
  -5 -16   0    3.58    0.30
  -6 -16   0    0.20    0.25
  -6 -16   0    0.15    0.15
  -7 -16   0    0.03    0.22
  -7 -16   0    0.10    0.13
  -8 -16   0    0.08    0.12
  -8 -16   0   -0.13    0.22
  -9 -16   0    0.80    0.15
  -9 -16   0    0.49    0.28
 -12  17   0    0.20    0.24
 -12  17   0    0.28    0.21
 -12  17   0   -0.06    0.23
  11 -17   0    0.50    0.23
 -11  17   0    0.06    0.21
 -11  17   0    0.38    0.19
 -11  17   0    0.52    0.26
  10 -17   0   -0.06    0.21
 -10  17   0    0.45    0.24
 -10  17   0    0.27    0.18
 -10  17   0   -0.01    0.19
   9 -17   0    0.34    0.23
  -9  17   0    0.71    0.26
  -9  17   0    0.27    0.18
  -9  17   0    0.11    0.19
   8 -17   0   -0.09    0.20
  -8  17   0   -0.28    0.21
  -8  17   0    0.19    0.16
  -8  17   0   -0.09    0.17
   7 -17   0    0.15    0.17
   7 -17   0    0.53    0.23
  -7  17   0    0.34    0.15
  -7  17   0    0.39    0.16
  -7  17   0    0.44    0.25
   6 -17   0    2.10    0.30
   6 -17   0    1.37    0.23
  -6  17   0    1.33    0.21
  -6  17   0    1.74    0.23
  -6  17   0    2.10    0.31
   5 -17   0    0.36    0.22
   5 -17   0    0.40    0.19
  -5  17   0    0.23    0.16
  -5  17   0    0.55    0.23
   4 -17   0    2.97    0.34
   4 -17   0    2.67    0.30
  -4  17   0    2.59    0.23
  -4  17   0    3.63    0.37
   3 -17   0    1.03    0.25
   3 -17   0    0.72    0.23
  -3  17   0    0.65    0.17
  -3  17   0    0.78    0.24
   2 -17   0    0.93    0.24
   2 -17   0    0.56    0.21
  -2  17   0    0.60    0.15
  -2  17   0    1.16    0.25
   1 -17   0    1.44    0.25
   1 -17   0    2.00    0.31
  -1  17   0    2.13    0.29
  -1  17   0    1.58    0.19
   0 -17   0    1.38    0.25
   0 -17   0    1.52    0.31
   0  17   0    1.20    0.22
  -1 -17   0   -0.01    0.20
  -1 -17   0    0.05    0.18
  -2 -17   0    0.54    0.19
  -2 -17   0    0.47    0.23
  -3 -17   0    1.94    0.26
  -3 -17   0    1.75    0.33
  -4 -17   0    0.53    0.18
  -4 -17   0    1.13    0.31
  -5 -17   0    0.56    0.27
  -5 -17   0    0.31    0.17
  -6 -17   0    0.61    0.27
  -6 -17   0    0.61    0.18
  -7 -17   0    0.00    0.13
  -7 -17   0   -0.22    0.21
  -8 -17   0    0.45    0.27
  -8 -17   0    0.28    0.14
  11 -18   0   -0.06    0.23
 -11  18   0   -0.11    0.22
 -11  18   0   -0.17    0.19
  10 -18   0   -0.03    0.21
 -10  18   0   -0.38    0.19
 -10  18   0    0.09    0.23
   9 -18   0    1.54    0.29
  -9  18   0    1.26    0.30
  -9  18   0    1.28    0.25
   8 -18   0    0.49    0.24
  -8  18   0    0.40    0.24
  -8  18   0    0.25    0.19
   7 -18   0    1.46    0.28
  -7  18   0    0.90    0.21
  -7  18   0    1.32    0.30
   6 -18   0   -0.26    0.19
   6 -18   0   -0.29    0.17
  -6  18   0   -0.16    0.16
  -6  18   0    0.06    0.22
   5 -18   0    4.13    0.35
   5 -18   0    3.80    0.38
  -5  18   0    5.46    0.47
  -5  18   0    3.95    0.33
   4 -18   0   -0.16    0.19
   4 -18   0   -0.10    0.19
  -4  18   0   -0.46    0.14
  -4  18   0    0.24    0.21
   3 -18   0    0.09    0.20
   3 -18   0    0.12    0.19
  -3  18   0    0.34    0.23
  -3  18   0   -0.04    0.17
   2 -18   0    0.08    0.20
   2 -18   0   -0.24    0.20
  -2  18   0    0.19    0.21
   1 -18   0    0.25    0.21
   1 -18   0    0.32    0.20
  -1  18   0    0.45    0.22
   0 -18   0    1.37    0.30
   0 -18   0    1.61    0.27
  -1 -18   0   -0.13    0.18
  -1 -18   0   -0.30    0.19
  -2 -18   0    0.31    0.23
  -2 -18   0    0.42    0.20
  -3 -18   0    0.54    0.20
  -3 -18   0    0.07    0.26
  -4 -18   0    3.25    0.32
  -4 -18   0    3.80    0.47
  -5 -18   0    1.41    0.23
  -5 -18   0    1.74    0.37
  -6 -18   0    0.89    0.19
  -6 -18   0    0.62    0.28
  10 -19   0    0.61    0.25
 -10  19   0    0.23    0.22
 -10  19   0    0.73    0.27
   9 -19   0    0.46    0.24
  -9  19   0    0.26    0.26
  -9  19   0    0.39    0.22
   8 -19   0    1.48    0.29
  -8  19   0    0.89    0.22
  -8  19   0    1.72    0.31
   7 -19   0    0.20    0.23
  -7  19   0   -0.22    0.17
  -7  19   0    0.40    0.24
   6 -19   0    0.25    0.22
   6 -19   0   -0.05    0.20
  -6  19   0    0.07    0.22
  -6  19   0   -0.10    0.18
   5 -19   0    6.45    0.43
   5 -19   0    7.90    0.52
  -5  19   0    8.17    0.50
   4 -19   0    1.57    0.28
   4 -19   0    2.42    0.34
  -4  19   0    2.28    0.33
   3 -19   0    0.13    0.22
   3 -19   0    0.11    0.22
  -3  19   0    0.32    0.22
   2 -19   0    0.16    0.21
   2 -19   0   -0.04    0.20
  -2  19   0    0.05    0.21
   1 -19   0   -0.04    0.21
   1 -19   0    0.03    0.20
   0 -19   0    0.07    0.19
   0 -19   0    0.11    0.22
  -1 -19   0    0.10    0.22
  -1 -19   0   -0.10    0.19
  -2 -19   0    0.99    0.30
  -2 -19   0    1.29    0.25
  -3 -19   0   -0.26    0.24
  -3 -19   0   -0.20    0.17
  -4 -19   0    0.88    0.33
  -4 -19   0    1.09    0.24
  -5 -19   0    0.32    0.30
  -5 -19   0    0.33    0.17
   8 -20   0    0.15    0.23
  -8  20   0    0.38    0.26
  -8  20   0   -0.84    0.26
   7 -20   0    0.59    0.26
  -7  20   0    0.57    0.26
   6 -20   0    0.09    0.21
  -6  20   0    0.40    0.24
   5 -20   0    0.40    0.23
   5 -20   0    0.42    0.23
  -5  20   0    0.93    0.28
   4 -20   0   -0.50    0.18
   4 -20   0   -0.13    0.20
  -4  20   0    0.06    0.22
   3 -20   0   -0.13    0.22
   3 -20   0    0.04    0.20
   2 -20   0    0.27    0.25
   2 -20   0    0.53    0.25
   1 -20   0   -0.49    0.21
   1 -20   0   -0.10    0.20
   0 -20   0    0.08    0.20
   0 -20   0   -0.25    0.20
  -1 -20   0    1.37    0.27
  -1 -20   0    1.29    0.33
  -2 -20   0   -0.24    0.21
  -2 -20   0   -0.04    0.19
  -3 -20   0    0.14    0.20
  -3 -20   0    0.06    0.26
   5 -21   0   -0.07    0.22
  -5  21   0    0.26    0.24
   4 -21   0   -0.35    0.20
   4 -21   0   -0.43    0.20
   3 -21   0    0.51    0.25
   3 -21   0   -0.35    0.22
   2 -21   0   -0.10    0.20
   2 -21   0   -0.26    0.23
   1 -21   0   -0.24    0.24
   1 -21   0    0.06    0.21
   0 -21   0    0.63    0.29
   0 -21   0    0.77    0.24
  -1 -21   1    0.22    0.22
  -1 -21   1   -0.10    0.23
   0 -21   1    1.02    0.31
   0 -21   1    0.90    0.25
   1 -21   1    1.53    0.28
   1 -21   1    1.50    0.31
   2 -21   1    1.38    0.32
   2 -21   1    2.50    0.35
   3 -21   1    0.28    0.25
   3 -21   1    0.43    0.24
   4 -21   1   -0.31    0.22
   4 -21   1   -0.23    0.21
  -5  21  -1   -0.20    0.22
   5 -21   1    0.19    0.24
  -6  21  -1    0.40    0.25
   6 -21   1   -0.27    0.22
  -4 -20   1    0.67    0.30
  -4 -20   1    0.24    0.18
  -3 -20   1   -0.24    0.26
  -3 -20   1   -0.12    0.17
  -2 -20   1    0.46    0.26
  -2 -20   1    0.24    0.19
  -1 -20   1    0.13    0.23
  -1 -20   1    0.44    0.21
   0 -20   1   -0.19    0.24
   0 -20   1    0.14    0.20
   1 -20   1    1.75    0.34
   1 -20   1    2.21    0.31
   2 -20   1    0.16    0.20
   2 -20   1   -0.02    0.23
  -3  20  -1    0.49    0.23
   3 -20   1   -0.23    0.21
   3 -20   1   -0.27    0.20
  -4  20  -1    1.15    0.28
   4 -20   1    0.74    0.26
   4 -20   1    0.49    0.25
  -5  20  -1    0.70    0.27
   5 -20   1   -0.15    0.20
   5 -20   1    0.24    0.24
  -6  20  -1   -0.22    0.24
  -6  20  -1    0.24    0.26
   6 -20   1    0.08    0.23
  -7  20  -1    0.00    0.22
  -7  20  -1    0.57    0.28
   7 -20   1    0.49    0.25
  -8  20  -1   -0.21    0.20
  -8  20  -1    0.23    0.26
   8 -20   1    0.31    0.25
  -6 -19   1    1.24    0.34
  -6 -19   1    1.46    0.23
  -5 -19   1   -0.07    0.28
  -5 -19   1    0.04    0.16
  -4 -19   1    0.07    0.16
  -4 -19   1    0.05    0.27
  -3 -19   1   -0.01    0.22
  -3 -19   1    0.08    0.16
  -2 -19   1    0.59    0.21
  -2 -19   1   -0.01    0.26
  -1 -19   1   -0.22    0.23
  -1 -19   1    0.07    0.17
   0 -19   1    2.71    0.36
   0 -19   1    2.33    0.29
   1 -19   1    0.01    0.20
   1 -19   1    0.11    0.19
  -2  19  -1    3.04    0.35
   2 -19   1    2.40    0.34
   2 -19   1    3.13    0.35
  -3  19  -1    0.39    0.24
   3 -19   1    0.16    0.20
   3 -19   1    0.23    0.22
  -4  19  -1    1.62    0.29
  -4  19  -1    0.66    0.21
   4 -19   1    1.27    0.26
   4 -19   1    1.44    0.27
  -5  19  -1   -0.37    0.16
  -5  19  -1    0.00    0.23
   5 -19   1   -0.25    0.19
   5 -19   1   -0.55    0.17
  -6  19  -1    0.21    0.20
  -6  19  -1    0.61    0.25
   6 -19   1    0.02    0.21
   6 -19   1    0.70    0.25
  -7  19  -1    0.27    0.20
  -7  19  -1    0.18    0.24
   7 -19   1   -0.05    0.20
  -8  19  -1    0.14    0.25
  -8  19  -1   -0.13    0.19
   8 -19   1   -0.25    0.20
  -9  19  -1    0.23    0.24
  -9  19  -1   -0.34    0.20
   9 -19   1    0.31    0.25
 -10  19  -1   -0.33    0.21
 -10  19  -1   -0.21    0.22
  10 -19   1    0.05    0.25
  -7 -18   1    1.24    0.36
  -7 -18   1    1.17    0.20
  -6 -18   1    0.03    0.24
  -6 -18   1    0.17    0.15
  -5 -18   1    1.35    0.21
  -5 -18   1    1.47    0.35
  -4 -18   1   -0.15    0.24
  -4 -18   1   -0.26    0.14
  -3 -18   1    0.38    0.24
  -3 -18   1    0.25    0.18
  -2 -18   1   -0.17    0.19
  -2 -18   1    0.48    0.19
  -1 -18   1    0.46    0.20
  -1 -18   1    0.51    0.24
   0  18  -1    0.92    0.31
   0 -18   1    0.39    0.21
   0 -18   1    0.48    0.25
  -1  18  -1    0.05    0.18
   1 -18   1    0.08    0.20
   1 -18   1    0.01    0.21
  -2  18  -1    7.39    0.47
  -2  18  -1    6.65    0.33
   2 -18   1    6.52    0.44
   2 -18   1    6.76    0.46
  -3  18  -1    0.01    0.16
  -3  18  -1    0.04    0.20
   3 -18   1   -0.16    0.19
   3 -18   1    0.08    0.19
  -4  18  -1    0.54    0.20
  -4  18  -1    1.54    0.30
   4 -18   1    1.27    0.25
   4 -18   1    1.15    0.25
  -5  18  -1    0.61    0.19
  -5  18  -1    0.97    0.27
   5 -18   1    0.88    0.25
   5 -18   1    0.74    0.22
  -6  18  -1    0.83    0.26
  -6  18  -1    0.41    0.19
   6 -18   1    0.29    0.20
   6 -18   1    0.66    0.24
  -7  18  -1    0.63    0.26
  -7  18  -1   -0.17    0.17
   7 -18   1    0.59    0.24
  -8  18  -1    2.85    0.37
  -8  18  -1    1.76    0.26
   8 -18   1    2.79    0.34
  -9  18  -1    0.23    0.21
  -9  18  -1    0.64    0.25
   9 -18   1    0.80    0.25
 -10  18  -1    1.70    0.27
 -10  18  -1    2.26    0.34
  10 -18   1    1.79    0.31
 -11  18  -1    0.07    0.23
 -11  18  -1    0.39    0.26
  11 -18   1   -0.16    0.22
  -8 -17   1   -0.01    0.12
  -8 -17   1    0.12    0.26
  -7 -17   1    0.79    0.31
  -7 -17   1    0.73    0.17
  -6 -17   1    0.08    0.14
  -6 -17   1    0.07    0.22
  -5 -17   1    0.26    0.16
  -5 -17   1    0.36    0.24
  -4 -17   1    0.46    0.24
  -4 -17   1    0.37    0.18
  -3 -17   1    0.48    0.24
  -3 -17   1    0.30    0.18
  -2 -17   1    1.64    0.30
  -2 -17   1    1.96    0.25
   1  17  -1    0.12    0.17
  -1 -17   1   -0.15    0.16
  -1 -17   1   -0.25    0.17
   0  17  -1    0.37    0.18
   0 -17   1    0.35    0.21
   0 -17   1    0.19    0.18
  -1  17  -1    0.15    0.20
  -1  17  -1    0.34    0.13
   1 -17   1    0.49    0.21
   1 -17   1    0.32    0.19
  -2  17  -1    1.11    0.25
  -2  17  -1    0.82    0.17
   2 -17   1    0.73    0.21
   2 -17   1    1.01    0.23
  -3  17  -1    0.94    0.24
  -3  17  -1    0.57    0.18
   3 -17   1    0.74    0.23
   3 -17   1    1.21    0.24
  -4  17  -1    0.26    0.17
  -4  17  -1    0.78    0.25
   4 -17   1    0.45    0.21
   4 -17   1    0.36    0.19
  -5  17  -1    1.22    0.21
  -5  17  -1    1.38    0.28
   5 -17   1    1.86    0.28
   5 -17   1    1.10    0.22
  -6  17  -1    0.14    0.21
  -6  17  -1   -0.11    0.14
  -6  17  -1    0.15    0.13
   6 -17   1   -0.07    0.17
   6 -17   1    0.37    0.21
  -7  17  -1    1.17    0.28
  -7  17  -1    0.46    0.18
  -7  17  -1    0.90    0.18
   7 -17   1    0.40    0.20
   7 -17   1    0.68    0.24
  -8  17  -1    1.47    0.24
  -8  17  -1    1.49    0.22
  -8  17  -1    2.18    0.32
   8 -17   1    2.02    0.32
  -9  17  -1    0.17    0.17
  -9  17  -1    0.37    0.19
  -9  17  -1    0.40    0.25
   9 -17   1    0.44    0.24
 -10  17  -1    1.37    0.24
 -10  17  -1    1.21    0.28
 -10  17  -1    1.17    0.24
  10 -17   1    1.41    0.28
 -11  17  -1   -0.14    0.22
 -11  17  -1    0.09    0.18
 -11  17  -1   -0.06    0.21
  11 -17   1   -0.21    0.20
 -12  17  -1    0.51    0.27
 -12  17  -1    0.43    0.23
 -12  17  -1    0.20    0.21
 -10 -16   1    0.20    0.26
  -9 -16   1    0.39    0.29
  -9 -16   1    0.30    0.12
  -8 -16   1    2.06    0.20
  -8 -16   1    2.04    0.39
  -7 -16   1    0.29    0.24
  -7 -16   1    0.06    0.13
  -6 -16   1    5.34    0.32
  -6 -16   1    5.38    0.48
  -5 -16   1    0.36    0.24
  -5 -16   1    0.19    0.14
  -4 -16   1    0.83    0.18
  -4 -16   1    0.82    0.26
  -3 -16   1    1.60    0.22
  -3 -16   1    1.86    0.33
   2  16  -1    3.07    0.28
  -2 -16   1    3.17    0.29
  -2 -16   1    3.40    0.39
   1  16  -1    0.09    0.16
  -1 -16   1    0.12    0.16
  -1 -16   1   -0.23    0.20
   0  16  -1    0.28    0.11
   0  16  -1   -0.07    0.17
   0 -16   1    0.26    0.18
   0 -16   1    0.34    0.18
   0 -16   1    0.21    0.21
  -1  16  -1    2.63    0.23
  -1  16  -1    2.88    0.30
   1 -16   1    2.43    0.27
   1 -16   1    2.63    0.23
   1 -16   1    2.38    0.29
  -2  16  -1    0.38    0.14
  -2  16  -1    0.61    0.22
   2 -16   1    0.57    0.20
   2 -16   1    0.45    0.18
  -3  16  -1    0.65    0.17
  -3  16  -1    1.15    0.12
  -3  16  -1    1.30    0.26
   3 -16   1    0.99    0.22
   3 -16   1    1.12    0.23
  -4  16  -1    0.69    0.23
  -4  16  -1    0.72    0.12
  -4  16  -1    0.41    0.17
   4 -16   1    0.65    0.20
   4 -16   1    0.95    0.22
  -5  16  -1    2.93    0.33
  -5  16  -1    3.32    0.29
  -5  16  -1    3.10    0.23
   5 -16   1    2.46    0.26
   5 -16   1    3.03    0.33
  -6  16  -1    6.12    0.36
  -6  16  -1    5.37    0.31
  -6  16  -1    5.80    0.45
   6 -16   1    5.61    0.35
   6 -16   1    5.68    0.41
  -7  16  -1   -0.01    0.17
  -7  16  -1   -0.19    0.19
  -7  16  -1   -0.15    0.13
   7 -16   1   -0.44    0.15
   7 -16   1   -0.13    0.18
  -8  16  -1    1.40    0.23
  -8  16  -1    1.74    0.30
  -8  16  -1    1.71    0.22
   8 -16   1    1.38    0.26
   8 -16   1    1.51    0.21
  -9  16  -1    0.06    0.17
  -9  16  -1    0.14    0.20
  -9  16  -1    0.11    0.16
   9 -16   1    0.06    0.20
 -10  16  -1    1.57    0.25
 -10  16  -1    2.66    0.34
 -10  16  -1    2.16    0.27
  10 -16   1    2.69    0.33
 -11  16  -1    0.20    0.22
 -11  16  -1    0.40    0.19
 -11  16  -1    0.49    0.24
  11 -16   1    0.15    0.21
 -12  16  -1    0.37    0.23
 -12  16  -1    0.43    0.22
 -12  16  -1    0.39    0.24
 -13  16  -1    0.36    0.24
 -13  16  -1    0.81    0.23
 -13  16  -1    0.81    0.28
 -10 -15   1    2.78    0.41
 -10 -15   1    2.13    0.19
  -9 -15   1    0.83    0.14
  -9 -15   1    1.10    0.30
  -8 -15   1    0.10    0.12
  -8 -15   1    0.23    0.24
  -7 -15   1    0.91    0.16
  -7 -15   1    1.09    0.29
  -6 -15   1    3.24    0.27
  -6 -15   1    3.34    0.41
  -5 -15   1    4.51    0.43
  -5 -15   1    4.52    0.30
  -4 -15   1    5.34    0.33
  -4 -15   1    4.92    0.43
   3  15  -1    0.54    0.17
  -3 -15   1    0.49    0.16
  -3 -15   1    0.48    0.22
   2  15  -1    1.76    0.24
  -2 -15   1    1.92    0.25
  -2 -15   1    2.04    0.18
  -2 -15   1    2.07    0.24
  -2 -15   1    1.66    0.28
   1  15  -1    2.88    0.29
  -1 -15   1    2.34    0.26
  -1 -15   1    1.90    0.28
  -1 -15   1    2.65    0.26
  -1 -15   1    2.45    0.18
   0  15  -1    6.49    0.27
   0  15  -1    6.56    0.38
   0 -15   1    6.06    0.27
   0 -15   1    6.61    0.39
   0 -15   1    6.00    0.40
   0 -15   1    6.61    0.37
  -1  15  -1    0.39    0.17
  -1  15  -1    0.25    0.12
   1 -15   1    0.36    0.11
   1 -15   1    0.32    0.19
   1 -15   1    0.30    0.17
  -2  15  -1    0.20    0.07
  -2  15  -1    0.21    0.14
  -2  15  -1    0.44    0.18
  -2  15  -1    0.30    0.07
   2 -15   1    0.42    0.19
   2 -15   1    0.26    0.16
   2 -15   1    0.20    0.12
  -3  15  -1    1.81    0.11
  -3  15  -1    1.39    0.18
  -3  15  -1    2.20    0.29
  -3  15  -1    1.28    0.13
  -3  15  -1    1.93    0.14
   3 -15   1    1.80    0.24
   3 -15   1    1.86    0.26
  -4  15  -1    0.67    0.12
  -4  15  -1    0.68    0.16
  -4  15  -1    0.78    0.22
  -4  15  -1    0.64    0.10
  -4  15  -1    0.78    0.11
   4 -15   1    0.56    0.18
   4 -15   1    0.61    0.20
  -5  15  -1    2.46    0.30
  -5  15  -1    2.08    0.22
  -5  15  -1    2.00    0.19
   5 -15   1    2.21    0.24
   5 -15   1    1.88    0.27
  -6  15  -1    0.08    0.13
  -6  15  -1    0.07    0.20
  -6  15  -1   -0.02    0.15
   6 -15   1   -0.11    0.14
   6 -15   1    0.16    0.19
  -7  15  -1    0.61    0.17
  -7  15  -1    0.65    0.17
  -7  15  -1    1.04    0.24
   7 -15   1    0.77    0.23
   7 -15   1    0.55    0.18
  -8  15  -1    0.08    0.15
  -8  15  -1   -0.24    0.14
  -8  15  -1    0.33    0.22
   8 -15   1   -0.01    0.18
   8 -15   1   -0.07    0.14
  -9  15  -1    0.52    0.19
  -9  15  -1    1.32    0.28
  -9  15  -1    0.76    0.20
   9 -15   1    1.15    0.24
 -10  15  -1    1.23    0.27
 -10  15  -1    1.31    0.23
 -10  15  -1    0.94    0.22
  10 -15   1    1.37    0.26
 -11  15  -1   -0.27    0.14
 -11  15  -1   -0.20    0.20
 -11  15  -1    0.09    0.18
  11 -15   1    0.16    0.20
 -12  15  -1    0.16    0.21
 -12  15  -1    0.38    0.22
 -12  15  -1    0.05    0.19
 -13  15  -1    0.07    0.19
 -13  15  -1    0.11    0.21
 -13  15  -1   -0.24    0.19
 -14  15  -1    0.26    0.23
 -14  15  -1    0.32    0.24
 -14  15  -1    0.07    0.22
 -11 -14   1    0.04    0.24
 -11 -14   1   -0.03    0.07
 -10 -14   1    0.83    0.12
 -10 -14   1    1.15    0.33
  -9 -14   1    4.30    0.23
  -9 -14   1    3.74    0.44
  -8 -14   1    3.58    0.42
  -8 -14   1    4.25    0.25
  -7 -14   1    1.72    0.18
  -7 -14   1    1.52    0.31
  -6 -14   1    3.09    0.38
  -6 -14   1    3.05    0.25
  -5 -14   1    0.04    0.22
  -5 -14   1   -0.16    0.12
  -5 -14   1    0.28    0.09
   4  14  -1    0.06    0.13
  -4 -14   1   -0.06    0.22
  -4 -14   1    0.07    0.13
  -4 -14   1   -0.06    0.07
  -4 -14   1   -0.14    0.17
   3  14  -1   14.71    0.49
  -3 -14   1   14.14    0.48
  -3 -14   1   14.66    0.52
  -3 -14   1   14.06    0.36
  -3 -14   1   14.21    0.62
   2  14  -1    0.06    0.13
  -2 -14   1    0.23    0.14
  -2 -14   1    0.14    0.14
  -2 -14   1    0.30    0.19
  -2 -14   1    0.29    0.09
   1  14  -1    0.25    0.14
  -1 -14   1    0.15    0.14
  -1 -14   1    0.24    0.19
  -1 -14   1    0.25    0.15
  -1 -14   1    0.27    0.09
   0  14  -1    4.00    0.30
   0  14  -1    3.75    0.21
   0 -14   1    4.10    0.33
   0 -14   1    3.27    0.20
   0 -14   1    3.48    0.30
   0 -14   1    3.87    0.30
  -1  14  -1   -0.11    0.14
  -1  14  -1    0.04    0.11
  -1  14  -1   -0.14    0.05
  -1  14  -1    0.02    0.04
   1 -14   1    0.05    0.16
   1 -14   1    0.09    0.14
   1 -14   1   -0.08    0.09
   1 -14   1   -0.02    0.14
  -2  14  -1    0.23    0.04
  -2  14  -1   -0.10    0.15
  -2  14  -1    0.20    0.12
  -2  14  -1    0.27    0.07
  -2  14  -1    0.20    0.07
   2 -14   1    0.36    0.17
   2 -14   1    0.22    0.17
   2 -14   1    0.19    0.11
  -3  14  -1    0.48    0.08
  -3  14  -1    0.47    0.10
  -3  14  -1    0.24    0.17
  -3  14  -1    0.47    0.08
  -3  14  -1    0.38    0.13
   3 -14   1    0.45    0.16
   3 -14   1    0.55    0.18
  -4  14  -1    0.15    0.13
  -4  14  -1    0.10    0.09
  -4  14  -1    0.19    0.18
  -4  14  -1    0.24    0.09
   4 -14   1    0.15    0.14
   4 -14   1    0.29    0.17
  -5  14  -1    4.50    0.37
  -5  14  -1    4.73    0.23
  -5  14  -1    4.61    0.25
  -5  14  -1    4.24    0.29
   5 -14   1    4.49    0.35
   5 -14   1    4.21    0.28
  -6  14  -1    0.22    0.14
  -6  14  -1    0.21    0.13
  -6  14  -1    0.27    0.12
  -6  14  -1    0.58    0.21
   6 -14   1    0.17    0.17
   6 -14   1    0.35    0.15
  -7  14  -1    4.48    0.32
  -7  14  -1    4.44    0.32
  -7  14  -1    4.71    0.39
  -7  14  -1    4.63    0.29
   7 -14   1    3.71    0.27
   7 -14   1    4.09    0.36
  -8  14  -1    0.11    0.16
  -8  14  -1    0.11    0.19
  -8  14  -1    0.08    0.14
   8 -14   1   -0.16    0.17
   8 -14   1    0.06    0.12
  -9  14  -1    0.98    0.24
  -9  14  -1    1.02    0.20
  -9  14  -1    0.79    0.21
   9 -14   1    1.29    0.24
   9 -14   1    1.25    0.15
 -10  14  -1    0.45    0.20
 -10  14  -1    0.62    0.24
 -10  14  -1    0.46    0.19
  10 -14   1    0.51    0.21
 -11  14  -1    0.70    0.22
 -11  14  -1    1.02    0.25
 -11  14  -1    0.81    0.21
  11 -14   1    1.11    0.24
 -12  14  -1    0.42    0.22
 -12  14  -1    0.98    0.24
 -12  14  -1    0.67    0.23
 -13  14  -1    0.02    0.21
 -13  14  -1    0.28    0.21
 -13  14  -1    0.26    0.21
 -14  14  -1   -0.02    0.20
 -14  14  -1    0.39    0.25
 -14  14  -1    0.11    0.20
 -12 -13   1   -0.07    0.23
 -11 -13   1    1.12    0.10
 -11 -13   1    1.12    0.32
 -10 -13   1    1.18    0.31
 -10 -13   1    1.45    0.13
  -9 -13   1   12.92    0.66
  -9 -13   1   12.16    0.36
  -8 -13   1    1.91    0.18
  -8 -13   1    2.32    0.19
  -8 -13   1    1.75    0.33
  -8 -13   1    1.87    0.28
  -7 -13   1   -0.05    0.11
  -7 -13   1   -0.15    0.20
  -7 -13   1    0.05    0.10
  -7 -13   1   -0.20    0.09
  -6 -13   1    4.38    0.41
  -6 -13   1    4.35    0.19
  -6 -13   1    4.20    0.26
   5  13  -1    0.17    0.12
  -5 -13   1   -0.05    0.11
  -5 -13   1   -0.11    0.07
  -5 -13   1    0.06    0.06
  -5 -13   1    0.04    0.19
  -5 -13   1    0.14    0.13
   4  13  -1    1.76    0.19
  -4 -13   1    1.81    0.14
  -4 -13   1    1.91    0.29
  -4 -13   1    2.01    0.21
  -4 -13   1    2.10    0.22
  -4 -13   1    1.87    0.09
   3  13  -1    0.99    0.16
  -3 -13   1    1.04    0.17
  -3 -13   1    0.88    0.16
  -3 -13   1    0.99    0.10
  -3 -13   1    1.31    0.25
   2  13  -1    2.95    0.25
  -2 -13   1    2.55    0.16
  -2 -13   1    2.94    0.32
  -2 -13   1    3.42    0.27
  -2 -13   1    2.53    0.23
   1  13  -1    9.21    0.38
  -1 -13   1    7.80    0.42
  -1 -13   1    8.85    0.37
  -1 -13   1    8.76    0.28
  -1 -13   1    8.81    0.39
   0  13  -1    3.97    0.29
   0  13  -1    3.84    0.21
   0 -13   1    3.57    0.20
   0 -13   1    4.13    0.29
   0 -13   1    4.07    0.33
   0 -13   1    3.86    0.28
  -1  13  -1    0.46    0.11
  -1  13  -1    0.67    0.17
  -1  13  -1    0.45    0.06
  -1  13  -1    0.37    0.06
   1 -13   1    0.48    0.11
   1 -13   1    0.33    0.17
   1 -13   1    0.42    0.16
   1 -13   1    0.44    0.15
  -2  13  -1    2.65    0.11
  -2  13  -1    2.88    0.27
  -2  13  -1    2.80    0.13
  -2  13  -1    2.89    0.22
   2 -13   1    2.78    0.26
   2 -13   1    2.51    0.27
   2 -13   1    2.63    0.21
   2 -13   1    3.04    0.27
  -3  13  -1    0.35    0.08
  -3  13  -1    0.37    0.08
  -3  13  -1    0.37    0.12
  -3  13  -1    0.35    0.17
   3 -13   1    0.26    0.14
   3 -13   1    0.27    0.12
   3 -13   1    0.30    0.15
  -4  13  -1    0.54    0.11
  -4  13  -1    0.85    0.20
  -4  13  -1    0.78    0.11
  -4  13  -1    0.67    0.14
   4 -13   1    0.57    0.15
   4 -13   1    0.54    0.17
  -5  13  -1    0.89    0.14
  -5  13  -1    0.81    0.13
  -5  13  -1    0.75    0.14
  -5  13  -1    0.98    0.21
   5 -13   1    1.10    0.20
   5 -13   1    0.92    0.16
  -6  13  -1    0.47    0.19
  -6  13  -1    0.35    0.13
  -6  13  -1    0.56    0.16
  -6  13  -1    0.25    0.12
   6 -13   1    0.11    0.13
   6 -13   1    0.29    0.17
  -7  13  -1    0.90    0.17
  -7  13  -1    1.01    0.20
  -7  13  -1    0.98    0.18
  -7  13  -1    0.96    0.22
   7 -13   1    0.97    0.16
   7 -13   1    0.99    0.21
  -8  13  -1    3.53    0.32
  -8  13  -1    2.64    0.26
  -8  13  -1    2.37    0.28
   8 -13   1    3.07    0.30
   8 -13   1    3.33    0.22
  -9  13  -1   13.06    0.51
  -9  13  -1   12.65    0.51
  -9  13  -1   12.61    0.55
   9 -13   1   13.13    0.54
   9 -13   1   13.68    0.38
 -10  13  -1    5.97    0.39
 -10  13  -1    6.68    0.44
 -10  13  -1    6.56    0.40
  10 -13   1    6.93    0.42
 -11  13  -1    0.19    0.20
 -11  13  -1    0.15    0.17
 -11  13  -1    0.10    0.18
  11 -13   1    0.38    0.20
 -12  13  -1    1.37    0.26
 -12  13  -1    1.05    0.24
 -12  13  -1    1.07    0.24
  12 -13   1    1.38    0.40
 -13  13  -1    4.16    0.40
 -13  13  -1    4.57    0.40
 -13  13  -1    4.41    0.42
 -14  13  -1    1.22    0.26
 -14  13  -1    0.58    0.24
 -14  13  -1    1.02    0.28
 -15  13  -1    2.36    0.33
 -15  13  -1    2.86    0.37
 -15  13  -1    2.65    0.33
 -13 -12   1    0.41    0.28
 -12 -12   1    0.07    0.25
 -11 -12   1    0.02    0.05
 -11 -12   1   -0.10    0.23
 -11 -12   1   -0.12    0.16
 -10 -12   1    2.09    0.20
 -10 -12   1    2.31    0.37
 -10 -12   1    2.30    0.15
  -9 -12   1    7.15    0.25
  -9 -12   1    7.51    0.33
  -9 -12   1    7.21    0.55
  -9 -12   1    6.55    0.30
  -8 -12   1   -0.09    0.22
  -8 -12   1    0.01    0.10
  -8 -12   1    0.06    0.09
  -8 -12   1   -0.04    0.10
  -7 -12   1    5.70    0.48
  -7 -12   1    6.21    0.28
  -7 -12   1    5.69    0.26
  -7 -12   1    5.66    0.24
  -7 -12   1    5.75    0.26
  -7 -12   1    6.48    0.26
  -7 -12   1    5.36    0.27
   6  12  -1    0.63    0.11
  -6 -12   1    0.65    0.23
  -6 -12   1    0.86    0.12
  -6 -12   1    0.51    0.10
  -6 -12   1    0.67    0.14
  -6 -12   1    0.39    0.10
  -6 -12   1    0.61    0.13
   5  12  -1    3.11    0.21
  -5 -12   1    3.32    0.16
  -5 -12   1    3.24    0.15
  -5 -12   1    3.28    0.23
  -5 -12   1    3.25    0.36
  -5 -12   1    3.31    0.24
  -5 -12   1    3.29    0.17
   4  12  -1   11.98    0.38
  -4 -12   1   11.49    0.30
  -4 -12   1   11.53    0.39
  -4 -12   1   11.93    0.53
  -4 -12   1   11.62    0.41
  -4 -12   1   11.42    0.25
   3  12  -1    0.12    0.11
  -3 -12   1    0.02    0.15
  -3 -12   1    0.17    0.07
  -3 -12   1    0.20    0.12
  -3 -12   1    0.11    0.11
   2  12  -1    3.42    0.25
  -2 -12   1    3.88    0.32
  -2 -12   1    4.02    0.25
  -2 -12   1    3.82    0.26
  -2 -12   1    3.92    0.17
   1  12  -1    2.38    0.22
  -1 -12   1    2.05    0.21
  -1 -12   1    1.96    0.14
  -1 -12   1    2.14    0.25
  -1 -12   1    2.92    0.26
   0  12  -1    2.17    0.17
   0  12  -1    1.74    0.19
   0 -12   1    2.12    0.22
   0 -12   1    2.11    0.21
   0 -12   1    1.84    0.23
   0 -12   1    2.04    0.15
  -1  12  -1   20.64    0.36
  -1  12  -1   22.08    0.51
  -1  12  -1   21.55    0.40
  -1  12  -1   22.11    0.61
  -1  12  -1   20.32    0.37
   1 -12   1   21.97    0.60
   1 -12   1   21.27    0.62
   1 -12   1   21.02    0.51
   1 -12   1   22.13    0.63
  -2  12  -1    0.55    0.12
  -2  12  -1    0.66    0.16
  -2  12  -1    0.45    0.07
  -2  12  -1    0.48    0.07
   2 -12   1    0.55    0.12
   2 -12   1    0.81    0.17
   2 -12   1    0.45    0.15
   2 -12   1    0.60    0.16
  -3  12  -1   11.18    0.36
  -3  12  -1   11.29    0.29
  -3  12  -1   11.25    0.44
   3 -12   1   11.50    0.38
   3 -12   1   11.07    0.40
   3 -12   1   10.79    0.51
   3 -12   1   11.24    0.43
  -4  12  -1    1.94    0.16
  -4  12  -1    2.22    0.21
  -4  12  -1    1.86    0.22
   4 -12   1    2.21    0.23
   4 -12   1    1.82    0.19
   4 -12   1    1.74    0.22
  -5  12  -1    2.91    0.20
  -5  12  -1    2.94    0.21
  -5  12  -1    2.82    0.22
  -5  12  -1    3.14    0.28
   5 -12   1    3.28    0.29
   5 -12   1    2.84    0.22
  -6  12  -1   16.21    0.48
  -6  12  -1   17.32    0.48
  -6  12  -1   17.21    0.51
  -6  12  -1   15.78    0.55
   6 -12   1   16.88    0.46
   6 -12   1   17.76    0.56
  -7  12  -1   12.58    0.50
  -7  12  -1   12.83    0.50
  -7  12  -1   12.83    0.45
  -7  12  -1   13.79    0.47
   7 -12   1   14.42    0.51
   7 -12   1   12.97    0.39
  -8  12  -1    0.78    0.18
  -8  12  -1    0.44    0.18
  -8  12  -1    0.77    0.20
   8 -12   1    0.53    0.18
   8 -12   1    0.71    0.12
  -9  12  -1    1.66    0.23
  -9  12  -1    2.41    0.25
  -9  12  -1    2.01    0.27
   9 -12   1    1.89    0.24
   9 -12   1    2.51    0.18
 -10  12  -1   13.64    0.55
 -10  12  -1   14.06    0.56
 -10  12  -1   12.89    0.51
  10 -12   1   13.12    0.37
  10 -12   1   14.26    0.53
 -11  12  -1    1.45    0.26
 -11  12  -1    2.04    0.28
 -11  12  -1    1.06    0.22
  11 -12   1    1.30    0.23
 -12  12  -1    0.98    0.22
 -12  12  -1    0.49    0.21
 -12  12  -1    0.68    0.23
  12 -12   1    0.83    0.23
 -13  12  -1    0.20    0.19
 -13  12  -1    0.11    0.19
 -13  12  -1    0.15    0.19
 -14  12  -1    0.12    0.21
 -14  12  -1    0.55    0.21
 -14  12  -1    0.32    0.22
 -15  12  -1    1.33    0.29
 -15  12  -1    0.92    0.24
 -15  12  -1    0.96    0.26
 -13 -11   1   -0.04    0.21
 -13 -11   1   -0.15    0.16
 -12 -11   1    4.21    0.44
 -12 -11   1    3.74    0.31
 -11 -11   1    0.11    0.22
 -11 -11   1    0.32    0.15
 -11 -11   1    0.06    0.13
 -10 -11   1   -0.08    0.11
 -10 -11   1   -0.19    0.22
 -10 -11   1    0.12    0.12
 -10 -11   1   -0.13    0.05
  -9 -11   1    0.63    0.24
  -9 -11   1    0.64    0.14
  -9 -11   1    0.58    0.14
  -9 -11   1    0.83    0.10
  -9 -11   1    0.88    0.13
  -8 -11   1    6.43    0.30
  -8 -11   1    6.08    0.24
  -8 -11   1    6.28    0.25
  -8 -11   1    5.99    0.27
  -8 -11   1    6.51    0.29
  -8 -11   1    7.00    0.47
   7  11  -1    1.33    0.13
  -7 -11   1    1.28    0.14
  -7 -11   1    1.82    0.16
  -7 -11   1    1.20    0.13
  -7 -11   1    1.40    0.16
  -7 -11   1    1.18    0.26
  -7 -11   1    1.43    0.15
  -7 -11   1    1.29    0.14
   6  11  -1    3.25    0.19
  -6 -11   1    2.82    0.32
  -6 -11   1    2.98    0.21
  -6 -11   1    3.26    0.18
  -6 -11   1    3.30    0.18
  -6 -11   1    2.89    0.20
  -6 -11   1    3.31    0.17
   5  11  -1    5.42    0.23
  -5 -11   1    6.48    0.41
  -5 -11   1    6.85    0.29
  -5 -11   1    6.50    0.22
  -5 -11   1    6.35    0.22
  -5 -11   1    6.55    0.27
  -5 -11   1    6.64    0.21
   4  11  -1   -0.02    0.09
  -4 -11   1    0.04    0.09
  -4 -11   1    0.06    0.05
  -4 -11   1    0.14    0.10
  -4 -11   1   -0.11    0.06
  -4 -11   1   -0.18    0.13
  -4 -11   1    0.13    0.06
   3  11  -1    0.39    0.11
  -3 -11   1    0.40    0.05
  -3 -11   1    0.46    0.13
  -3 -11   1    0.27    0.07
  -3 -11   1    0.28    0.17
  -3 -11   1    0.27    0.11
   2  11  -1    0.09    0.10
  -2 -11   1    0.05    0.10
  -2 -11   1   -0.07    0.09
  -2 -11   1    0.09    0.15
  -2 -11   1   -0.06    0.05
   1  11  -1    3.05    0.16
   1  11  -1    3.09    0.23
  -1 -11   1    3.32    0.16
  -1 -11   1    3.32    0.24
  -1 -11   1    3.50    0.24
  -1 -11   1    2.86    0.29
   0  11  -1    6.52    0.14
   0  11  -1    6.56    0.24
   0  11  -1    6.77    0.31
   0 -11   1    6.35    0.30
   0 -11   1    7.00    0.24
   0 -11   1    6.83    0.33
   0 -11   1    7.02    0.36
  -1  11  -1    3.02    0.11
  -1  11  -1    2.85    0.18
  -1  11  -1    2.90    0.24
  -1  11  -1    3.09    0.10
   1 -11   1    3.27    0.26
   1 -11   1    2.84    0.24
   1 -11   1    3.11    0.18
   1 -11   1    3.44    0.25
  -2  11  -1    1.48    0.18
  -2  11  -1    1.75    0.12
  -2  11  -1    1.48    0.14
  -2  11  -1    1.82    0.11
   2 -11   1    1.72    0.20
   2 -11   1    1.76    0.21
   2 -11   1    1.66    0.15
   2 -11   1    2.15    0.22
  -3  11  -1    2.95    0.25
  -3  11  -1    3.06    0.20
  -3  11  -1    2.93    0.16
   3 -11   1    3.38    0.27
   3 -11   1    2.93    0.22
   3 -11   1    2.68    0.23
   3 -11   1    3.17    0.21
  -4  11  -1    0.14    0.11
  -4  11  -1    0.29    0.09
  -4  11  -1    0.29    0.14
   4 -11   1    0.02    0.10
   4 -11   1    0.14    0.11
   4 -11   1    0.17    0.13
  -5  11  -1   11.40    0.36
  -5  11  -1   11.94    0.40
  -5  11  -1   12.37    0.40
  -5  11  -1   11.45    0.44
   5 -11   1   11.59    0.44
   5 -11   1   12.09    0.36
  -6  11  -1    3.42    0.23
  -6  11  -1    3.79    0.23
  -6  11  -1    3.84    0.30
  -6  11  -1    3.73    0.23
  -6  11  -1    3.92    0.27
   6 -11   1    3.72    0.22
   6 -11   1    3.30    0.26
  -7  11  -1    3.92    0.26
  -7  11  -1    4.00    0.30
  -7  11  -1    3.75    0.29
  -7  11  -1    3.61    0.22
  -7  11  -1    3.57    0.24
   7 -11   1    3.67    0.21
   7 -11   1    3.49    0.29
  -8  11  -1    0.38    0.11
  -8  11  -1    0.20    0.16
  -8  11  -1    0.14    0.15
  -8  11  -1    0.08    0.13
   8 -11   1    0.23    0.15
   8 -11   1    0.31    0.09
  -9  11  -1    4.49    0.35
  -9  11  -1    4.42    0.22
  -9  11  -1    4.22    0.33
  -9  11  -1    4.49    0.32
   9 -11   1    4.36    0.32
   9 -11   1    4.90    0.22
 -10  11  -1   14.73    0.56
 -10  11  -1   14.76    0.56
 -10  11  -1   14.50    0.56
  10 -11   1   14.77    0.53
 -11  11  -1    8.92    0.46
 -11  11  -1    8.53    0.44
 -11  11  -1    8.48    0.44
  11 -11   1    8.87    0.42
 -12  11  -1    3.64    0.35
 -12  11  -1    3.92    0.34
 -12  11  -1    3.24    0.33
  12 -11   1    3.81    0.32
 -13  11  -1    0.46    0.19
 -13  11  -1    0.59    0.22
 -13  11  -1    0.39    0.21
 -14  11  -1    0.08    0.18
 -14  11  -1    0.01    0.20
 -14  11  -1    0.14    0.20
 -15  11  -1   -0.09    0.23
 -15  11  -1    0.05    0.18
 -15  11  -1   -0.01    0.21
 -16  11  -1   -0.36    0.20
 -16  11  -1   -0.06    0.17
 -16  11  -1   -0.31    0.20
 -14 -10   1    0.06    0.16
 -14 -10   1    0.02    0.21
 -13 -10   1    0.65    0.19
 -13 -10   1    0.95    0.30
 -12 -10   1    5.06    0.32
 -12 -10   1    5.11    0.34
 -12 -10   1    5.46    0.50
 -11 -10   1    0.21    0.15
 -11 -10   1   -0.04    0.13
 -11 -10   1    0.16    0.23
 -10 -10   1    3.85    0.26
 -10 -10   1    3.74    0.13
 -10 -10   1    3.63    0.28
 -10 -10   1    4.37    0.44
 -10 -10   1    3.63    0.13
  -9 -10   1    0.16    0.20
  -9 -10   1   -0.04    0.11
  -9 -10   1   -0.07    0.06
  -9 -10   1   -0.01    0.06
  -9 -10   1    0.02    0.11
   8  10  -1    1.18    0.10
  -8 -10   1    1.15    0.12
  -8 -10   1    1.34    0.12
  -8 -10   1    1.16    0.16
  -8 -10   1    1.42    0.16
  -8 -10   1    1.81    0.22
  -8 -10   1    1.18    0.25
   7  10  -1    0.43    0.08
  -7 -10   1    0.45    0.09
  -7 -10   1    0.62    0.13
  -7 -10   1    0.30    0.20
  -7 -10   1    0.50    0.10
  -7 -10   1    0.34    0.10
  -7 -10   1    0.35    0.11
   6  10  -1    0.18    0.08
  -6 -10   1    0.06    0.08
  -6 -10   1    0.27    0.07
  -6 -10   1   -0.03    0.07
  -6 -10   1    0.04    0.15
  -6 -10   1    0.20    0.09
  -6 -10   1   -0.09    0.07
  -5 -10   1    3.18    0.16
  -5 -10   1    2.79    0.29
  -5 -10   1    2.98    0.15
  -5 -10   1    2.62    0.14
  -5 -10   1    2.67    0.18
  -5 -10   1    2.93    0.19
   4  10  -1    5.96    0.24
  -4 -10   1    5.76    0.26
  -4 -10   1    5.86    0.18
  -4 -10   1    5.79    0.20
  -4 -10   1    5.92    0.19
  -4 -10   1    6.08    0.39
  -4 -10   1    6.01    0.25
   3  10  -1   13.32    0.38
  -3 -10   1   12.87    0.51
  -3 -10   1   13.69    0.39
  -3 -10   1   13.28    0.31
  -3 -10   1   13.88    0.41
  -3 -10   1   12.94    0.26
   2  10  -1    3.80    0.22
  -2 -10   1    3.39    0.22
  -2 -10   1    3.67    0.23
  -2 -10   1    3.62    0.15
  -2 -10   1    3.90    0.29
   1  10  -1   36.56    0.69
   1  10  -1   36.31    0.60
   1  10  -1   36.65    0.79
  -1 -10   1   36.67    0.69
  -1 -10   1   35.84    0.80
  -1 -10   1   35.50    0.78
  -1 -10   1   34.92    0.87
   0  10  -1    0.10    0.08
   0  10  -1    0.22    0.04
   0  10  -1    0.23    0.03
   0  10  -1    0.11    0.11
   0 -10   1    0.25    0.12
   0 -10   1    0.30    0.14
   0 -10   1    0.22    0.07
   0 -10   1    0.03    0.11
  -1  10  -1    0.19    0.08
  -1  10  -1    0.01    0.12
  -1  10  -1    0.13    0.05
   1 -10   1   -0.02    0.07
   1 -10   1    0.20    0.12
   1 -10   1    0.06    0.10
   1 -10   1    0.06    0.11
  -2  10  -1   36.19    0.71
  -2  10  -1   35.74    0.80
   2 -10   1   33.94    0.72
   2 -10   1   33.74    0.78
   2 -10   1   35.16    0.79
   2 -10   1   33.93    0.80
  -3  10  -1   14.89    0.40
  -3  10  -1   15.22    0.48
  -3  10  -1   15.60    0.48
   3 -10   1   15.07    0.43
   3 -10   1   15.35    0.43
   3 -10   1   14.46    0.47
   3 -10   1   14.68    0.46
  -4  10  -1    0.04    0.10
  -4  10  -1    0.06    0.09
  -4  10  -1    0.27    0.13
  -4  10  -1   -0.01    0.09
  -4  10  -1    0.14    0.12
   4 -10   1    0.04    0.09
   4 -10   1    0.09    0.10
   4 -10   1    0.12    0.12
   4 -10   1    0.03    0.12
  -5  10  -1   -0.04    0.09
  -5  10  -1    0.00    0.09
  -5  10  -1   -0.01    0.09
  -5  10  -1    0.04    0.12
  -5  10  -1    0.05    0.12
   5 -10   1   -0.01    0.12
   5 -10   1    0.04    0.12
   5 -10   1   -0.02    0.09
  -6  10  -1    2.35    0.21
  -6  10  -1    2.83    0.20
  -6  10  -1    2.80    0.22
  -6  10  -1    2.87    0.25
  -6  10  -1    2.72    0.20
  -6  10  -1    2.86    0.25
   6 -10   1    2.86    0.25
   6 -10   1    2.54    0.19
  -7  10  -1    0.65    0.15
  -7  10  -1    0.66    0.16
  -7  10  -1    0.58    0.16
  -7  10  -1    0.47    0.15
  -7  10  -1    0.57    0.13
  -7  10  -1    0.60    0.11
   7 -10   1    0.75    0.11
   7 -10   1    0.55    0.16
  -8  10  -1    1.18    0.18
  -8  10  -1    1.35    0.14
  -8  10  -1    1.41    0.21
  -8  10  -1    1.31    0.20
  -8  10  -1    1.73    0.22
   8 -10   1    1.53    0.20
   8 -10   1    1.45    0.14
  -9  10  -1    1.62    0.22
  -9  10  -1    1.21    0.20
  -9  10  -1    1.40    0.21
  -9  10  -1    1.58    0.23
  -9  10  -1    1.56    0.15
   9 -10   1    1.52    0.20
   9 -10   1    1.45    0.15
 -10  10  -1   10.65    0.47
 -10  10  -1    9.81    0.45
 -10  10  -1    9.67    0.30
 -10  10  -1   11.11    0.47
 -10  10  -1   10.29    0.45
  10 -10   1   10.59    0.44
 -11  10  -1   12.17    0.53
 -11  10  -1   12.98    0.53
 -11  10  -1   12.11    0.49
  11 -10   1   12.57    0.48
 -12  10  -1    1.66    0.28
 -12  10  -1    1.61    0.26
 -12  10  -1    2.08    0.26
  12 -10   1    1.80    0.23
 -13  10  -1    1.77    0.27
 -13  10  -1    2.15    0.26
 -13  10  -1    1.93    0.28
 -14  10  -1   -0.37    0.17
 -14  10  -1    0.02    0.20
 -14  10  -1    0.01    0.16
 -15  10  -1    0.38    0.23
 -15  10  -1    0.53    0.20
 -15  10  -1    0.68    0.24
 -16  10  -1    0.61    0.21
 -16  10  -1    0.59    0.25
 -16  10  -1    0.46    0.24
 -15  -9   1    0.05    0.23
 -15  -9   1   -0.04    0.16
 -14  -9   1    0.04    0.22
 -14  -9   1   -0.11    0.15
 -13  -9   1    0.83    0.20
 -13  -9   1    0.63    0.19
 -13  -9   1    0.49    0.23
 -12  -9   1   -0.15    0.12
 -12  -9   1   -0.06    0.13
 -12  -9   1    0.32    0.21
 -11  -9   1    0.53    0.16
 -11  -9   1    0.55    0.15
 -11  -9   1    0.60    0.23
 -10  -9   1    1.55    0.28
 -10  -9   1    1.24    0.18
 -10  -9   1    1.17    0.17
  -9  -9   1    2.40    0.12
  -9  -9   1    2.52    0.33
  -9  -9   1    2.14    0.20
  -9  -9   1    2.42    0.22
  -9  -9   1    2.60    0.13
   8   9  -1    5.31    0.14
  -8  -9   1    5.20    0.18
  -8  -9   1    5.22    0.20
  -8  -9   1    5.53    0.40
  -8  -9   1    5.31    0.28
  -8  -9   1    4.89    0.24
  -8  -9   1    5.72    0.33
   7   9  -1    1.64    0.11
  -7  -9   1    1.56    0.14
  -7  -9   1    1.69    0.16
  -7  -9   1    1.61    0.25
  -7  -9   1    1.63    0.16
  -7  -9   1    1.61    0.13
  -7  -9   1    1.77    0.17
   6   9  -1    3.77    0.16
  -6  -9   1    3.87    0.18
  -6  -9   1    3.87    0.19
  -6  -9   1    3.59    0.18
  -6  -9   1    4.38    0.35
  -6  -9   1    4.24    0.20
  -5  -9   1    1.62    0.14
  -5  -9   1    1.80    0.14
  -5  -9   1    1.46    0.23
  -5  -9   1    1.60    0.12
  -5  -9   1    1.73    0.12
  -5  -9   1    1.65    0.15
   4   9  -1    2.65    0.17
  -4  -9   1    2.81    0.19
  -4  -9   1    2.63    0.18
  -4  -9   1    2.70    0.14
  -4  -9   1    2.56    0.13
  -4  -9   1    2.87    0.27
  -4  -9   1    2.64    0.12
   3   9  -1   12.48    0.29
   3   9  -1   12.59    0.35
   3   9  -1   12.86    0.37
  -3  -9   1   12.17    0.37
  -3  -9   1   12.58    0.27
  -3  -9   1   12.65    0.36
  -3  -9   1   12.45    0.48
  -3  -9   1   12.38    0.26
  -3  -9   1   12.37    0.30
   2   9  -1    0.82    0.12
   2   9  -1    0.91    0.07
   2   9  -1    0.93    0.13
  -2  -9   1    0.86    0.08
  -2  -9   1    0.93    0.18
  -2  -9   1    0.88    0.06
  -2  -9   1    1.04    0.14
  -2  -9   1    1.04    0.14
   1   9  -1    8.19    0.18
   1   9  -1    8.50    0.24
   1   9  -1    8.72    0.31
   1   9  -1    8.26    0.30
  -1  -9   1    8.62    0.36
  -1  -9   1    8.55    0.32
  -1  -9   1    8.53    0.23
  -1  -9   1    7.88    0.30
   0   9  -1   34.54    0.76
   0   9  -1   33.93    0.59
   0   9  -1   36.72    0.77
   0   9  -1   36.26    0.68
   0   9  -1   35.36    0.59
   0  -9   1   35.89    0.68
   0  -9   1   35.58    0.82
   0  -9   1   35.66    0.78
   0  -9   1   34.77    0.76
  -1   9  -1    8.00    0.19
  -1   9  -1    7.71    0.32
  -1   9  -1    8.65    0.26
   1  -9   1    7.58    0.32
   1  -9   1    7.91    0.31
   1  -9   1    8.03    0.32
   1  -9   1    8.19    0.26
  -2   9  -1   37.47    0.74
  -2   9  -1   36.73    0.81
  -2   9  -1   37.32    0.82
   2  -9   1   36.88    0.83
   2  -9   1   38.58    0.81
   2  -9   1   37.19    0.76
   2  -9   1   38.28    0.82
  -3   9  -1   37.59    0.83
  -3   9  -1   36.85    0.80
  -3   9  -1   36.99    0.76
  -3   9  -1   36.44    0.82
   3  -9   1   37.70    0.78
   3  -9   1   37.45    0.77
   3  -9   1   38.01    0.84
   3  -9   1   36.05    0.80
  -4   9  -1    8.79    0.31
  -4   9  -1    8.64    0.30
  -4   9  -1    8.61    0.35
  -4   9  -1    8.79    0.34
   4  -9   1    8.56    0.29
   4  -9   1    8.53    0.34
   4  -9   1    8.98    0.35
   4  -9   1    8.30    0.32
  -5   9  -1   14.55    0.43
  -5   9  -1   14.78    0.40
  -5   9  -1   13.94    0.40
  -5   9  -1   14.42    0.46
  -5   9  -1   14.91    0.47
   5  -9   1   14.78    0.45
   5  -9   1   14.78    0.38
   5  -9   1   14.59    0.45
  -6   9  -1    0.15    0.10
  -6   9  -1    0.01    0.11
  -6   9  -1   -0.13    0.10
  -6   9  -1    0.09    0.08
  -6   9  -1   -0.18    0.11
  -6   9  -1   -0.11    0.12
   6  -9   1    0.03    0.08
   6  -9   1   -0.10    0.11
  -7   9  -1    0.39    0.14
  -7   9  -1    0.26    0.13
  -7   9  -1    0.09    0.12
  -7   9  -1    0.06    0.08
  -7   9  -1    0.23    0.13
  -7   9  -1    0.26    0.14
   7  -9   1    0.23    0.08
   7  -9   1    0.31    0.13
  -8   9  -1    1.73    0.21
  -8   9  -1    1.65    0.14
  -8   9  -1    1.34    0.20
  -8   9  -1    1.26    0.19
  -8   9  -1    1.53    0.20
   8  -9   1    1.57    0.14
   8  -9   1    1.27    0.18
  -9   9  -1    1.11    0.18
  -9   9  -1    1.14    0.19
  -9   9  -1    1.27    0.20
  -9   9  -1    1.10    0.12
  -9   9  -1    1.53    0.22
   9  -9   1    1.30    0.19
 -10   9  -1   10.95    0.48
 -10   9  -1   10.34    0.48
 -10   9  -1   10.67    0.44
 -10   9  -1   10.76    0.30
 -10   9  -1   11.04    0.45
  10  -9   1   10.85    0.42
 -11   9  -1    4.59    0.33
 -11   9  -1    3.69    0.32
 -11   9  -1    3.86    0.34
 -11   9  -1    3.54    0.25
 -11   9  -1    4.07    0.31
  11  -9   1    4.04    0.29
 -12   9  -1    0.69    0.17
 -12   9  -1    1.00    0.22
 -12   9  -1    1.02    0.22
  12  -9   1    0.96    0.18
 -13   9  -1    0.71    0.19
 -13   9  -1    0.66    0.22
 -13   9  -1    0.85    0.23
 -14   9  -1    0.97    0.21
 -14   9  -1    0.79    0.23
 -14   9  -1    1.45    0.27
 -15   9  -1    0.03    0.16
 -15   9  -1    0.20    0.22
 -15   9  -1    0.23    0.21
 -16   9  -1    0.11    0.23
 -16   9  -1   -0.16    0.20
 -16   9  -1    0.14    0.16
 -15  -8   1   -0.10    0.18
 -15  -8   1    0.16    0.20
 -15  -8   1    0.14    0.19
 -14  -8   1    0.09    0.17
 -14  -8   1    0.08    0.21
 -14  -8   1   -0.21    0.15
 -13  -8   1   -0.03    0.15
 -13  -8   1    0.19    0.21
 -13  -8   1    0.20    0.16
 -12  -8   1    0.09    0.14
 -12  -8   1    0.04    0.20
 -12  -8   1    0.12    0.15
 -11  -8   1    0.07    0.19
 -11  -8   1    0.18    0.13
 -11  -8   1   -0.08    0.12
 -10  -8   1    0.69    0.15
 -10  -8   1    0.57    0.14
 -10  -8   1    0.62    0.23
  -9  -8   1    9.41    0.37
  -9  -8   1    8.98    0.48
  -9  -8   1    9.06    0.20
  -9  -8   1    8.93    0.34
  -9  -8   1    9.47    0.21
  -8  -8   1    3.18    0.14
  -8  -8   1    2.94    0.21
  -8  -8   1    3.22    0.27
  -8  -8   1    3.45    0.23
  -8  -8   1    3.01    0.13
  -8  -8   1    3.00    0.33
   7   8  -1    1.21    0.09
   7   8  -1    1.21    0.09
  -7  -8   1    1.13    0.22
  -7  -8   1    1.34    0.11
  -7  -8   1    1.06    0.14
  -7  -8   1    1.21    0.10
  -7  -8   1    1.14    0.13
  -7  -8   1    1.52    0.16
   6   8  -1   10.78    0.27
   6   8  -1   10.88    0.28
  -6  -8   1   10.63    0.31
  -6  -8   1   10.97    0.33
  -6  -8   1   11.10    0.30
  -6  -8   1   11.07    0.29
  -6  -8   1   10.91    0.47
   5   8  -1    0.18    0.06
   5   8  -1    0.18    0.07
  -5  -8   1    0.15    0.08
  -5  -8   1    0.16    0.06
  -5  -8   1   -0.01    0.15
  -5  -8   1    0.09    0.07
  -5  -8   1    0.25    0.09
   4   8  -1    5.02    0.20
   4   8  -1    4.84    0.19
  -4  -8   1    5.29    0.19
  -4  -8   1    4.64    0.31
  -4  -8   1    4.78    0.20
  -4  -8   1    4.99    0.16
  -4  -8   1    4.86    0.21
  -4  -8   1    5.10    0.18
   3   8  -1    1.58    0.14
   3   8  -1    1.55    0.12
   3   8  -1    1.59    0.13
  -3  -8   1    1.25    0.13
  -3  -8   1    1.54    0.10
  -3  -8   1    1.65    0.09
  -3  -8   1    1.66    0.14
  -3  -8   1    1.45    0.11
  -3  -8   1    1.39    0.19
   2   8  -1    1.35    0.13
   2   8  -1    1.65    0.10
   2   8  -1    1.85    0.16
  -2  -8   1    1.72    0.11
  -2  -8   1    1.59    0.20
  -2  -8   1    1.62    0.07
  -2  -8   1    1.68    0.15
  -2  -8   1    1.52    0.14
   1   8  -1    6.65    0.16
   1   8  -1    6.27    0.26
   1   8  -1    6.82    0.26
   1   8  -1    7.11    0.21
  -1  -8   1    6.86    0.26
  -1  -8   1    7.15    0.20
  -1  -8   1    6.46    0.27
  -1  -8   1    6.91    0.31
   0   8  -1    5.13    0.12
   0   8  -1    5.27    0.24
   0   8  -1    5.05    0.18
   0   8  -1    5.12    0.12
   0  -8   1    5.31    0.28
   0  -8   1    5.11    0.17
   0  -8   1    5.20    0.23
   0  -8   1    4.85    0.24
  -1   8  -1    8.79    0.32
  -1   8  -1    9.51    0.26
  -1   8  -1    9.32    0.32
   1  -8   1    9.12    0.32
   1  -8   1    9.20    0.27
   1  -8   1    8.74    0.31
   1  -8   1    9.30    0.33
  -2   8  -1  103.05    1.80
  -2   8  -1  100.83    1.80
  -2   8  -1   94.80    1.78
  -2   8  -1  101.18    1.72
   2  -8   1   99.67    1.80
   2  -8   1   99.76    1.76
   2  -8   1   98.75    1.78
   2  -8   1  100.78    1.74
  -3   8  -1    0.22    0.11
  -3   8  -1    0.02    0.08
  -3   8  -1    0.05    0.11
  -3   8  -1    0.09    0.08
   3  -8   1    0.24    0.11
   3  -8   1    0.16    0.11
   3  -8   1    0.08    0.08
   3  -8   1    0.04    0.09
  -4   8  -1    2.95    0.18
  -4   8  -1    3.10    0.19
  -4   8  -1    2.79    0.22
  -4   8  -1    2.74    0.22
   4  -8   1    3.02    0.20
   4  -8   1    3.22    0.22
   4  -8   1    2.90    0.17
   4  -8   1    3.27    0.23
  -5   8  -1   13.70    0.39
  -5   8  -1   13.70    0.41
  -5   8  -1   13.32    0.43
  -5   8  -1   13.99    0.43
  -5   8  -1   13.76    0.36
   5  -8   1   13.84    0.44
   5  -8   1   13.77    0.42
   5  -8   1   13.26    0.35
   5  -8   1   13.76    0.43
  -6   8  -1    7.40    0.32
  -6   8  -1    7.87    0.33
  -6   8  -1    7.66    0.25
  -6   8  -1    7.15    0.30
  -6   8  -1    7.33    0.32
  -6   8  -1    6.93    0.30
   6  -8   1    7.72    0.32
   6  -8   1    7.47    0.24
  -7   8  -1    0.88    0.16
  -7   8  -1    0.75    0.14
  -7   8  -1    0.77    0.15
  -7   8  -1    0.77    0.15
  -7   8  -1    0.83    0.10
  -7   8  -1    0.59    0.14
   7  -8   1    0.68    0.14
   7  -8   1    0.91    0.10
  -8   8  -1    2.34    0.22
  -8   8  -1    2.30    0.23
  -8   8  -1    2.42    0.23
  -8   8  -1    2.36    0.15
  -8   8  -1    2.54    0.24
   8  -8   1    2.52    0.16
   8  -8   1    2.40    0.21
  -9   8  -1    0.01    0.07
  -9   8  -1    0.09    0.12
  -9   8  -1    0.12    0.12
  -9   8  -1    0.13    0.15
  -9   8  -1    0.18    0.14
   9  -8   1    0.07    0.12
 -10   8  -1    1.80    0.23
 -10   8  -1    2.48    0.24
 -10   8  -1    2.22    0.15
 -10   8  -1    2.28    0.26
 -10   8  -1    2.06    0.21
  10  -8   1    2.51    0.23
 -11   8  -1    0.43    0.18
 -11   8  -1    0.78    0.17
 -11   8  -1    0.72    0.17
 -11   8  -1    0.71    0.20
 -11   8  -1    0.50    0.10
  11  -8   1    0.59    0.15
 -12   8  -1    7.26    0.37
 -12   8  -1    6.77    0.42
 -12   8  -1    6.34    0.41
  12  -8   1    7.42    0.34
 -13   8  -1    3.61    0.30
 -13   8  -1    3.66    0.37
 -13   8  -1    2.75    0.31
 -14   8  -1    2.73    0.36
 -14   8  -1    2.47    0.26
 -14   8  -1    2.28    0.29
 -15   8  -1    0.20    0.21
 -15   8  -1    0.19    0.16
 -15   8  -1    0.16    0.24
 -16   8  -1    0.68    0.27
 -16   8  -1    0.73    0.18
 -16   8  -1    0.88    0.26
 -15  -7   1    0.32    0.22
 -15  -7   1    0.16    0.17
 -15  -7   1    0.30    0.18
 -14  -7   1    0.71    0.20
 -14  -7   1    0.32    0.21
 -14  -7   1    0.41    0.19
 -13  -7   1    4.22    0.34
 -13  -7   1    4.13    0.33
 -13  -7   1    3.91    0.41
 -12  -7   1    3.30    0.35
 -12  -7   1    3.10    0.29
 -12  -7   1    3.48    0.29
 -11  -7   1    0.09    0.13
 -11  -7   1    0.03    0.18
 -11  -7   1    0.17    0.14
 -10  -7   1    0.79    0.15
 -10  -7   1    0.87    0.16
 -10  -7   1    0.79    0.21
  -9  -7   1    0.04    0.10
  -9  -7   1    0.12    0.10
  -9  -7   1    0.06    0.15
  -8  -7   1    0.29    0.11
  -8  -7   1    0.15    0.04
  -8  -7   1    0.17    0.04
  -8  -7   1    0.14    0.09
  -8  -7   1    0.18    0.14
  -8  -7   1   -0.05    0.16
   7   7  -1    1.59    0.07
   7   7  -1    1.71    0.07
  -7  -7   1    1.47    0.10
  -7  -7   1    1.41    0.15
  -7  -7   1    1.34    0.14
  -7  -7   1    1.73    0.17
  -7  -7   1    1.74    0.25
  -7  -7   1    1.82    0.11
   6   7  -1    5.71    0.17
   6   7  -1    5.35    0.16
  -6  -7   1    5.52    0.22
  -6  -7   1    5.53    0.24
  -6  -7   1    5.63    0.19
  -6  -7   1    5.39    0.18
  -6  -7   1    5.46    0.34
   5   7  -1    1.36    0.11
   5   7  -1    1.26    0.10
   5   7  -1    1.44    0.14
  -5  -7   1    1.44    0.14
  -5  -7   1    1.34    0.11
  -5  -7   1    1.23    0.12
  -5  -7   1    1.27    0.11
  -5  -7   1    1.14    0.19
   4   7  -1   -0.02    0.06
   4   7  -1    0.01    0.02
   4   7  -1    0.08    0.07
  -4  -7   1   -0.04    0.12
  -4  -7   1   -0.07    0.06
  -4  -7   1   -0.05    0.06
  -4  -7   1   -0.04    0.05
  -4  -7   1    0.04    0.07
   3   7  -1    0.22    0.07
   3   7  -1    0.28    0.08
   3   7  -1    0.11    0.07
  -3  -7   1    0.23    0.06
  -3  -7   1    0.21    0.06
  -3  -7   1    0.23    0.08
  -3  -7   1    0.10    0.04
  -3  -7   1    0.26    0.08
  -3  -7   1    0.17    0.13
   2   7  -1   18.08    0.43
   2   7  -1   18.64    0.36
   2   7  -1   18.81    0.43
  -2  -7   1   18.39    0.43
  -2  -7   1   18.41    0.44
  -2  -7   1   18.71    0.35
  -2  -7   1   18.33    0.33
  -2  -7   1   19.20    0.38
  -2  -7   1   17.61    0.52
   1   7  -1    1.42    0.07
   1   7  -1    1.57    0.11
   1   7  -1    1.14    0.04
   1   7  -1    1.70    0.14
  -1  -7   1    1.44    0.16
  -1  -7   1    1.44    0.09
  -1  -7   1    1.29    0.12
  -1  -7   1    1.48    0.13
   0   7  -1   45.40    0.75
   0   7  -1   44.45    0.88
   0   7  -1   44.28    0.81
   0   7  -1   45.80    0.88
   0  -7   1   46.94    0.82
   0  -7   1   46.97    0.90
   0  -7   1   46.35    0.93
   0  -7   1   43.85    0.87
  -1   7  -1    4.85    0.18
  -1   7  -1    4.54    0.23
  -1   7  -1    4.76    0.22
  -1   7  -1    4.52    0.22
   1  -7   1    4.76    0.18
   1  -7   1    4.52    0.21
   1  -7   1    4.64    0.21
   1  -7   1    4.74    0.22
  -2   7  -1    0.80    0.12
  -2   7  -1    0.80    0.09
  -2   7  -1    0.67    0.11
  -2   7  -1    0.66    0.11
   2  -7   1    0.61    0.11
   2  -7   1    0.91    0.13
   2  -7   1    0.67    0.12
   2  -7   1    0.65    0.09
  -3   7  -1   15.01    0.42
  -3   7  -1   14.67    0.42
  -3   7  -1   16.03    0.39
  -3   7  -1   15.43    0.39
   3  -7   1   16.04    0.42
   3  -7   1   15.23    0.37
   3  -7   1   15.03    0.39
   3  -7   1   16.06    0.43
  -4   7  -1   17.85    0.47
  -4   7  -1   18.11    0.46
  -4   7  -1   17.96    0.43
  -4   7  -1   17.91    0.48
   4  -7   1   20.04    0.50
   4  -7   1   18.76    0.41
   4  -7   1   19.25    0.48
   4  -7   1   18.50    0.48
  -5   7  -1    5.32    0.20
  -5   7  -1    5.80    0.26
  -5   7  -1    5.44    0.27
  -5   7  -1    5.35    0.27
   5  -7   1    5.68    0.26
   5  -7   1    5.50    0.20
   5  -7   1    5.39    0.25
   5  -7   1    5.27    0.26
  -6   7  -1    4.77    0.26
  -6   7  -1    4.17    0.25
  -6   7  -1    4.57    0.25
  -6   7  -1    4.45    0.25
  -6   7  -1    4.40    0.17
  -6   7  -1    4.23    0.24
   6  -7   1    4.55    0.26
   6  -7   1    4.32    0.27
   6  -7   1    4.34    0.24
   6  -7   1    4.54    0.18
  -7   7  -1    1.11    0.16
  -7   7  -1    1.16    0.17
  -7   7  -1    1.29    0.17
  -7   7  -1    1.04    0.10
  -7   7  -1    1.06    0.16
  -7   7  -1    1.05    0.16
   7  -7   1    0.96    0.11
   7  -7   1    1.22    0.15
  -8   7  -1   54.70    1.16
  -8   7  -1   51.76    1.09
  -8   7  -1   52.60    1.13
  -8   7  -1   54.35    0.97
  -8   7  -1   53.90    1.10
   8  -7   1   55.28    1.08
  -9   7  -1    1.25    0.17
  -9   7  -1    0.97    0.11
  -9   7  -1    1.12    0.19
  -9   7  -1    1.04    0.18
  -9   7  -1    1.35    0.18
   9  -7   1    1.39    0.17
 -10   7  -1    3.35    0.26
 -10   7  -1    3.11    0.28
 -10   7  -1    3.06    0.17
 -10   7  -1    3.41    0.25
 -10   7  -1    3.46    0.29
  10  -7   1    3.39    0.24
 -11   7  -1    1.58    0.23
 -11   7  -1    1.46    0.14
 -11   7  -1    1.72    0.24
 -11   7  -1    1.51    0.19
 -11   7  -1    1.79    0.21
  11  -7   1    1.60    0.18
 -12   7  -1    0.23    0.18
 -12   7  -1    0.04    0.18
 -12   7  -1    0.32    0.14
  12  -7   1    0.51    0.14
 -13   7  -1    1.15    0.24
 -13   7  -1    1.34    0.20
 -13   7  -1    1.18    0.23
 -14   7  -1   -0.15    0.18
 -14   7  -1   -0.14    0.17
 -14   7  -1   -0.29    0.12
 -15   7  -1    0.24    0.21
 -15   7  -1    0.61    0.23
 -15   7  -1    0.30    0.15
 -16   7  -1   -0.09    0.20
 -16   7  -1   -0.22    0.19
 -16   7  -1   -0.01    0.14
 -17   7  -1    0.78    0.28
 -17   7  -1    1.04    0.29
 -16  -6   1    0.19    0.21
 -16  -6   1    0.18    0.19
 -16  -6   1    0.37    0.21
 -15  -6   1    0.35    0.20
 -15  -6   1    0.50    0.22
 -15  -6   1    0.62    0.20
 -14  -6   1    0.08    0.17
 -14  -6   1   -0.15    0.18
 -14  -6   1    0.05    0.17
 -13  -6   1    0.37    0.20
 -13  -6   1    0.39    0.17
 -13  -6   1    0.39    0.16
 -12  -6   1    1.19    0.20
 -12  -6   1    1.45    0.21
 -12  -6   1    1.69    0.28
 -11  -6   1    1.08    0.19
 -11  -6   1    1.14    0.24
 -11  -6   1    0.92    0.17
 -10  -6   1    0.24    0.16
 -10  -6   1    0.32    0.13
 -10  -6   1    0.35    0.14
  -9  -6   1    0.30    0.11
  -9  -6   1    0.37    0.12
  -8  -6   1   12.31    0.41
  -8  -6   1   11.37    0.22
  -8  -6   1   11.65    0.40
  -8  -6   1   11.59    0.38
  -7  -6   1    0.57    0.06
  -7  -6   1    0.46    0.11
  -7  -6   1    0.40    0.11
  -7  -6   1    0.55    0.06
  -7  -6   1    0.37    0.10
   6   6  -1    1.97    0.08
   6   6  -1    1.99    0.08
  -6  -6   1    1.89    0.11
  -6  -6   1    1.84    0.15
  -6  -6   1    1.98    0.10
  -6  -6   1    2.20    0.17
   5   6  -1    6.00    0.17
   5   6  -1    6.27    0.17
   5   6  -1    6.02    0.23
  -5  -6   1    5.84    0.21
  -5  -6   1    5.80    0.19
  -5  -6   1    5.63    0.22
  -5  -6   1    5.93    0.18
  -5  -6   1    5.89    0.33
   4   6  -1    0.16    0.08
   4   6  -1    0.08    0.06
   4   6  -1    0.06    0.05
  -4  -6   1    0.07    0.07
  -4  -6   1    0.04    0.06
  -4  -6   1    0.09    0.06
  -4  -6   1    0.02    0.11
  -4  -6   1    0.04    0.06
   3   6  -1   37.07    0.69
   3   6  -1   37.55    0.70
  -3  -6   1   36.71    0.69
  -3  -6   1   37.61    0.71
  -3  -6   1   37.19    0.68
  -3  -6   1   38.06    0.66
  -3  -6   1   36.19    0.83
   2   6  -1  100.99    1.65
   2   6  -1   95.98    1.65
   2   6  -1   94.79    1.60
  -2  -6   1   95.30    1.77
  -2  -6   1   94.39    1.64
  -2  -6   1   95.62    1.66
  -2  -6   1  102.04    1.65
  -2  -6   1   98.00    1.61
  -2  -6   1   95.05    1.59
   1   6  -1    9.61    0.27
   1   6  -1   10.07    0.23
   1   6  -1    9.76    0.20
  -1  -6   1    9.88    0.28
  -1  -6   1   10.10    0.33
  -1  -6   1   10.52    0.29
  -1  -6   1   10.40    0.23
   0   6  -1    3.28    0.08
   0   6  -1    3.34    0.17
   0   6  -1    3.28    0.19
   0   6  -1    3.25    0.16
   0   6  -1    3.69    0.14
   0  -6   1    3.57    0.13
   0  -6   1    3.11    0.17
   0  -6   1    3.36    0.17
   0  -6   1    3.52    0.19
  -1   6  -1    3.77    0.18
  -1   6  -1    3.79    0.19
  -1   6  -1    3.58    0.15
  -1   6  -1    3.48    0.18
   1  -6   1    3.96    0.19
   1  -6   1    3.43    0.18
   1  -6   1    3.85    0.19
   1  -6   1    3.67    0.14
  -2   6  -1    2.46    0.15
  -2   6  -1    2.51    0.17
  -2   6  -1    2.71    0.15
  -2   6  -1    2.48    0.16
   2  -6   1    2.58    0.17
   2  -6   1    2.57    0.17
   2  -6   1    2.67    0.14
   2  -6   1    2.28    0.14
  -3   6  -1    0.06    0.07
  -3   6  -1    0.14    0.09
  -3   6  -1    0.20    0.07
  -3   6  -1    0.04    0.08
   3  -6   1    0.18    0.09
   3  -6   1    0.07    0.08
   3  -6   1    0.20    0.07
   3  -6   1    0.07    0.07
  -4   6  -1    5.63    0.25
  -4   6  -1    5.88    0.19
  -4   6  -1    5.57    0.23
  -4   6  -1    5.99    0.25
   4  -6   1    5.53    0.19
   4  -6   1    5.45    0.24
   4  -6   1    5.43    0.23
   4  -6   1    5.95    0.25
  -5   6  -1    0.36    0.11
  -5   6  -1    0.43    0.11
  -5   6  -1    0.27    0.11
  -5   6  -1    0.45    0.08
  -5   6  -1    0.37    0.11
   5  -6   1    0.39    0.11
   5  -6   1    0.42    0.11
   5  -6   1    0.56    0.12
   5  -6   1    0.46    0.08
  -6   6  -1    2.77    0.14
  -6   6  -1    2.57    0.20
  -6   6  -1    2.61    0.20
  -6   6  -1    2.73    0.22
  -6   6  -1    2.54    0.21
  -6   6  -1    2.52    0.21
   6  -6   1    2.53    0.20
   6  -6   1    2.79    0.19
   6  -6   1    2.66    0.22
   6  -6   1    2.52    0.15
  -7   6  -1    1.81    0.19
  -7   6  -1    1.88    0.18
  -7   6  -1    1.71    0.18
  -7   6  -1    1.64    0.13
  -7   6  -1    1.98    0.18
  -7   6  -1    1.94    0.20
   7  -6   1    2.14    0.18
  -8   6  -1   10.88    0.38
  -8   6  -1   11.54    0.42
  -8   6  -1   11.28    0.42
  -8   6  -1   11.39    0.38
  -8   6  -1   10.69    0.29
   8  -6   1   11.30    0.36
  -9   6  -1   19.83    0.53
  -9   6  -1   19.39    0.43
  -9   6  -1   18.70    0.51
  -9   6  -1   18.99    0.59
  -9   6  -1   19.46    0.59
   9  -6   1   19.26    0.50
 -10   6  -1    4.23    0.20
 -10   6  -1    4.44    0.31
 -10   6  -1    4.18    0.31
 -10   6  -1    4.59    0.27
 -10   6  -1    4.37    0.26
  10  -6   1    4.54    0.24
 -11   6  -1    0.77    0.12
 -11   6  -1    0.73    0.19
 -11   6  -1    0.61    0.19
 -11   6  -1    0.58    0.14
 -11   6  -1    1.06    0.17
  11  -6   1    0.70    0.14
 -12   6  -1    1.82    0.26
 -12   6  -1    1.89    0.20
 -12   6  -1    2.40    0.21
 -12   6  -1    2.51    0.29
  12  -6   1    2.46    0.21
 -13   6  -1    0.11    0.18
 -13   6  -1   -0.01    0.12
 -13   6  -1   -0.02    0.17
 -14   6  -1    0.96    0.24
 -14   6  -1    0.82    0.17
 -14   6  -1    1.01    0.24
 -15   6  -1    0.45    0.21
 -15   6  -1    0.73    0.25
 -15   6  -1    0.70    0.16
 -16   6  -1    0.43    0.23
 -16   6  -1    0.30    0.14
 -16   6  -1    0.06    0.23
 -17   6  -1    1.23    0.19
 -17   6  -1    1.23    0.30
 -17   6  -1    1.11    0.29
 -16  -5   1    0.37    0.23
 -16  -5   1    0.16    0.21
 -16  -5   1    0.14    0.20
 -15  -5   1    0.86    0.23
 -15  -5   1    1.16    0.23
 -15  -5   1    0.81    0.25
 -14  -5   1    0.95    0.22
 -14  -5   1    1.06    0.22
 -14  -5   1    1.38    0.27
 -13  -5   1    1.05    0.22
 -13  -5   1    1.20    0.24
 -13  -5   1    1.13    0.21
 -12  -5   1    0.06    0.13
 -12  -5   1    0.12    0.13
 -12  -5   1   -0.03    0.16
 -11  -5   1    0.30    0.14
 -11  -5   1    0.20    0.14
 -10  -5   1    0.06    0.11
 -10  -5   1    0.14    0.13
  -9  -5   1    4.35    0.27
  -9  -5   1    4.39    0.26
  -8  -5   1   24.51    0.62
  -8  -5   1   24.97    0.64
  -8  -5   1   24.50    0.60
  -7  -5   1    5.61    0.12
  -7  -5   1    5.27    0.23
  -7  -5   1    5.88    0.27
  -7  -5   1    6.16    0.27
  -7  -5   1    5.52    0.12
   6   5  -1   92.64    1.66
  -6  -5   1   91.40    1.65
  -6  -5   1   92.00    1.50
  -6  -5   1   91.09    1.64
  -6  -5   1   91.97    1.51
  -6  -5   1   92.32    1.62
   5   5  -1   33.29    0.56
   5   5  -1   31.86    0.57
   5   5  -1   31.89    0.67
  -5  -5   1   32.09    0.58
  -5  -5   1   33.01    0.67
  -5  -5   1   33.99    0.65
  -5  -5   1   32.35    0.59
   4   5  -1   18.19    0.36
   4   5  -1   18.10    0.36
   4   5  -1   19.15    0.43
  -4  -5   1   18.91    0.37
  -4  -5   1   17.97    0.39
  -4  -5   1   19.06    0.42
  -4  -5   1   18.47    0.37
   3   5  -1    0.54    0.08
   3   5  -1    0.38    0.06
  -3  -5   1    0.39    0.11
  -3  -5   1    0.35    0.06
  -3  -5   1    0.45    0.06
  -3  -5   1    0.42    0.06
  -3  -5   1    0.41    0.07
   2   5  -1   71.87    1.25
   2   5  -1   72.86    1.25
   2   5  -1   72.76    1.23
  -2  -5   1   75.61    1.23
  -2  -5   1   72.04    1.26
  -2  -5   1   75.14    1.25
  -2  -5   1   72.39    1.23
  -2  -5   1   72.60    1.36
  -2  -5   1   73.74    1.22
   1   5  -1   45.43    0.79
   1   5  -1   45.79    0.82
   1   5  -1   45.87    0.76
   1   5  -1   45.43    0.82
  -1  -5   1   45.73    0.78
  -1  -5   1   44.87    0.82
  -1  -5   1   43.62    0.83
  -1  -5   1   46.36    0.90
   0   5  -1   70.26    1.23
   0   5  -1   72.00    1.19
   0   5  -1   70.04    1.23
   0   5  -1   71.81    1.27
   0  -5   1   71.60    1.19
   0  -5   1   70.36    1.26
   0  -5   1   68.36    1.23
   0  -5   1   69.70    1.22
  -1   5  -1  206.21    3.70
  -1   5  -1  212.12    3.68
  -1   5  -1  214.19    3.75
  -1   5  -1  208.97    3.43
   1  -5   1  191.85    3.42
   1  -5   1  216.66    6.14
   1  -5   1  207.73    3.44
   1  -5   1  219.80    3.54
  -2   5  -1    8.26    0.26
  -2   5  -1    8.12    0.23
  -2   5  -1    8.02    0.23
  -2   5  -1    7.85    0.26
   2  -5   1    8.10    0.25
   2  -5   1    8.34    0.26
   2  -5   1    8.13    0.23
   2  -5   1    8.06    0.22
  -3   5  -1    5.83    0.22
  -3   5  -1    5.52    0.22
  -3   5  -1    5.67    0.18
  -3   5  -1    5.73    0.21
   3  -5   1    5.71    0.21
   3  -5   1    5.81    0.22
   3  -5   1    5.67    0.22
   3  -5   1    5.66    0.18
  -4   5  -1   31.47    0.59
  -4   5  -1   32.30    0.66
  -4   5  -1   31.31    0.65
  -4   5  -1   32.80    0.66
  -4   5  -1   31.03    0.66
   4  -5   1   31.44    0.67
   4  -5   1   30.79    0.59
   4  -5   1   32.26    0.66
   4  -5   1   30.56    0.64
  -5   5  -1   28.76    0.55
  -5   5  -1   28.94    0.65
  -5   5  -1   29.29    0.63
  -5   5  -1   29.00    0.64
  -5   5  -1   29.53    0.63
   5  -5   1   29.32    0.66
   5  -5   1   27.86    0.60
   5  -5   1   29.74    0.57
   5  -5   1   28.89    0.63
  -6   5  -1   18.88    0.47
  -6   5  -1   18.49    0.49
  -6   5  -1   18.77    0.51
  -6   5  -1   18.42    0.47
  -6   5  -1   19.26    0.40
  -6   5  -1   18.94    0.51
   6  -5   1   18.56    0.52
   6  -5   1   19.14    0.42
   6  -5   1   18.45    0.45
   6  -5   1   18.71    0.47
  -7   5  -1    1.32    0.15
  -7   5  -1    1.41    0.18
  -7   5  -1    1.03    0.15
  -7   5  -1    1.17    0.12
  -7   5  -1    1.32    0.18
  -7   5  -1    1.24    0.14
   7  -5   1    1.08    0.19
   7  -5   1    1.24    0.14
   7  -5   1    1.11    0.14
  -8   5  -1    0.20    0.08
  -8   5  -1    0.09    0.09
  -8   5  -1    0.18    0.12
  -8   5  -1    0.26    0.13
  -8   5  -1    0.19    0.11
   8  -5   1    0.10    0.09
  -9   5  -1    0.19    0.11
  -9   5  -1    0.07    0.13
  -9   5  -1    0.16    0.10
  -9   5  -1    0.08    0.13
  -9   5  -1    0.19    0.08
   9  -5   1    0.15    0.09
 -10   5  -1    1.41    0.16
 -10   5  -1    1.86    0.14
 -10   5  -1    1.70    0.22
 -10   5  -1    1.68    0.17
 -10   5  -1    1.47    0.21
  10  -5   1    1.54    0.15
 -11   5  -1    5.68    0.36
 -11   5  -1    5.45    0.36
 -11   5  -1    5.59    0.28
 -11   5  -1    6.13    0.24
 -11   5  -1    5.71    0.29
  11  -5   1    5.31    0.25
 -12   5  -1    1.16    0.16
 -12   5  -1    0.93    0.23
 -12   5  -1    1.09    0.23
 -12   5  -1    1.54    0.16
 -12   5  -1    1.16    0.17
  12  -5   1    1.11    0.15
 -13   5  -1    0.19    0.12
 -13   5  -1   -0.18    0.18
 -13   5  -1    0.01    0.18
 -14   5  -1    3.48    0.36
 -14   5  -1    3.39    0.35
 -14   5  -1    3.71    0.26
 -15   5  -1   -0.06    0.19
 -15   5  -1    0.17    0.21
 -15   5  -1    0.10    0.12
 -16   5  -1   -0.21    0.19
 -16   5  -1    0.03    0.12
 -16   5  -1   -0.07    0.20
 -17   5  -1    0.66    0.25
 -17   5  -1    0.81    0.27
 -17   5  -1    1.06    0.17
 -16  -4   1    1.70    0.27
 -16  -4   1    1.13    0.26
 -16  -4   1    1.51    0.28
 -15  -4   1    0.24    0.18
 -15  -4   1   -0.13    0.16
 -15  -4   1    0.07    0.17
 -14  -4   1    5.66    0.41
 -14  -4   1    4.58    0.38
 -14  -4   1    3.94    0.36
 -13  -4   1    1.83    0.27
 -13  -4   1    1.63    0.24
 -13  -4   1    1.53    0.23
 -12  -4   1    0.65    0.17
 -12  -4   1    0.78    0.18
 -11  -4   1    4.23    0.31
 -11  -4   1    4.15    0.30
 -10  -4   1    1.24    0.17
 -10  -4   1    1.10    0.18
  -9  -4   1    2.92    0.22
  -9  -4   1    2.45    0.21
  -8  -4   1    1.06    0.15
  -8  -4   1    0.94    0.14
  -8  -4   1    0.96    0.16
  -7  -4   1    4.85    0.25
  -7  -4   1    4.36    0.23
  -7  -4   1    4.23    0.24
   6   4  -1   69.80    1.31
  -6  -4   1   70.57    1.30
  -6  -4   1   71.39    1.28
  -6  -4   1   69.02    1.13
  -6  -4   1   70.39    1.13
  -6  -4   1   69.23    1.30
   5   4  -1   35.32    0.72
  -5  -4   1   36.29    0.72
  -5  -4   1   35.52    0.70
  -5  -4   1   34.68    0.60
  -5  -4   1   35.61    0.60
   4   4  -1   20.97    0.38
   4   4  -1   21.60    0.38
   4   4  -1   21.24    0.47
  -4  -4   1   21.50    0.46
  -4  -4   1   21.21    0.39
  -4  -4   1   21.66    0.39
  -4  -4   1   21.56    0.44
   3   4  -1   96.53    1.61
   3   4  -1   98.24    1.66
   3   4  -1   98.61    1.62
  -3  -4   1   98.49    1.76
  -3  -4   1   99.60    1.62
  -3  -4   1  100.98    1.65
  -3  -4   1   97.41    1.61
  -3  -4   1   98.86    1.63
   2   4  -1   93.84    1.57
  -2  -4   1   94.60    1.68
  -2  -4   1   93.87    1.57
  -2  -4   1  100.83    1.62
  -2  -4   1   93.19    1.56
  -2  -4   1   93.48    1.57
   1   4  -1   20.31    0.39
   1   4  -1   20.91    0.47
   1   4  -1   20.84    0.41
   1   4  -1   20.24    0.41
   1   4  -1   20.75    0.37
  -1  -4   1   21.54    0.39
  -1  -4   1   20.88    0.41
  -1  -4   1   20.10    0.46
  -1  -4   1   19.52    0.40
   0   4  -1   85.26    1.53
   0   4  -1   86.68    1.44
   0   4  -1   86.31    1.47
   0   4  -1   85.23    1.44
   0  -4   1   84.94    1.49
   0  -4   1   83.25    1.44
   0  -4   1   84.86    1.44
   0  -4   1   86.49    1.47
  -1   4  -1   19.28    0.41
  -1   4  -1   19.55    0.41
  -1   4  -1   18.79    0.38
  -1   4  -1   18.72    0.41
   1  -4   1   19.71    0.39
   1  -4   1   19.25    0.40
   1  -4   1   20.14    0.42
   1  -4   1   19.04    0.41
  -2   4  -1    5.39    0.20
  -2   4  -1    5.69    0.21
  -2   4  -1    5.74    0.19
  -2   4  -1    5.67    0.17
   2  -4   1    5.52    0.20
   2  -4   1    5.90    0.19
   2  -4   1    5.55    0.20
   2  -4   1    5.69    0.17
  -3   4  -1    2.92    0.12
  -3   4  -1    2.99    0.15
  -3   4  -1    3.09    0.16
  -3   4  -1    2.94    0.16
  -3   4  -1    2.80    0.15
   3  -4   1    2.74    0.12
   3  -4   1    2.92    0.14
   3  -4   1    3.01    0.16
   3  -4   1    2.64    0.15
  -4   4  -1    1.78    0.13
  -4   4  -1    1.60    0.14
  -4   4  -1    1.82    0.11
  -4   4  -1    1.69    0.14
  -4   4  -1    1.99    0.15
   4  -4   1    1.60    0.15
   4  -4   1    1.66    0.11
   4  -4   1    1.52    0.13
   4  -4   1    1.62    0.13
  -5   4  -1    5.13    0.17
  -5   4  -1    4.88    0.21
  -5   4  -1    4.72    0.23
  -5   4  -1    5.21    0.21
  -5   4  -1    4.99    0.22
   5  -4   1    4.90    0.20
   5  -4   1    4.86    0.21
   5  -4   1    5.16    0.19
   5  -4   1    5.05    0.24
  -6   4  -1    2.71    0.18
  -6   4  -1    2.88    0.21
  -6   4  -1    2.47    0.20
  -6   4  -1    3.10    0.15
  -6   4  -1    2.64    0.18
  -6   4  -1    3.09    0.21
   6  -4   1    2.85    0.18
   6  -4   1    2.99    0.17
   6  -4   1    2.86    0.21
  -7   4  -1    4.20    0.18
  -7   4  -1    4.24    0.21
  -7   4  -1    4.09    0.21
  -7   4  -1    3.95    0.25
  -7   4  -1    4.48    0.25
  -7   4  -1    4.16    0.25
   7  -4   1    4.09    0.21
   7  -4   1    3.94    0.19
   7  -4   1    3.86    0.25
  -8   4  -1   13.43    0.35
  -8   4  -1   13.48    0.38
  -8   4  -1   13.52    0.45
  -8   4  -1   13.04    0.37
  -8   4  -1   13.30    0.45
   8  -4   1   13.26    0.36
  -9   4  -1    6.73    0.34
  -9   4  -1    7.32    0.27
  -9   4  -1    7.02    0.35
  -9   4  -1    6.82    0.25
  -9   4  -1    7.19    0.28
   9  -4   1    7.39    0.26
 -10   4  -1    9.19    0.41
 -10   4  -1    9.51    0.32
 -10   4  -1    9.32    0.31
 -10   4  -1    9.98    0.34
 -10   4  -1    9.92    0.42
  10  -4   1    9.55    0.31
 -11   4  -1   13.56    0.42
 -11   4  -1   13.56    0.40
 -11   4  -1   13.81    0.52
 -11   4  -1   13.95    0.53
 -11   4  -1   12.78    0.40
  11  -4   1   13.64    0.38
 -12   4  -1    2.45    0.19
 -12   4  -1    1.87    0.18
 -12   4  -1    1.39    0.23
 -12   4  -1    1.83    0.19
 -12   4  -1    1.60    0.25
 -13   4  -1    4.21    0.25
 -13   4  -1    4.32    0.37
 -13   4  -1    4.53    0.37
 -14   4  -1   -0.02    0.19
 -14   4  -1   -0.06    0.10
 -14   4  -1    0.13    0.18
 -15   4  -1    0.12    0.20
 -15   4  -1    0.15    0.11
 -15   4  -1   -0.02    0.19
 -16   4  -1    0.39    0.22
 -16   4  -1   -0.09    0.19
 -16   4  -1    0.08    0.11
 -17   4  -1    0.15    0.22
 -17   4  -1   -0.15    0.10
 -17   4  -1   -0.14    0.20
 -17  -3   1    0.12    0.21
 -17  -3   1    0.19    0.23
 -16  -3   1    0.98    0.25
 -16  -3   1    0.94    0.26
 -16  -3   1    1.10    0.25
 -15  -3   1    4.30    0.37
 -15  -3   1    4.23    0.40
 -15  -3   1    5.03    0.42
 -14  -3   1    9.17    0.48
 -14  -3   1    9.53    0.47
 -14  -3   1    9.11    0.46
 -13  -3   1    1.59    0.24
 -13  -3   1    2.16    0.28
 -13  -3   1    1.83    0.25
 -12  -3   1    2.06    0.24
 -12  -3   1    1.83    0.23
 -11  -3   1    0.37    0.14
 -11  -3   1    0.02    0.13
 -10  -3   1    6.59    0.33
 -10  -3   1    6.25    0.32
  -9  -3   1    9.47    0.38
  -9  -3   1    9.62    0.39
  -8  -3   1    2.03    0.19
  -8  -3   1    2.09    0.20
  -8  -3   1    1.72    0.18
  -7  -3   1  150.23    2.60
  -7  -3   1  152.74    2.62
  -7  -3   1  149.99    2.61
   6   3  -1   59.90    1.14
  -6  -3   1   59.65    1.12
  -6  -3   1   60.15    1.14
  -6  -3   1   58.73    1.13
   5   3  -1    0.55    0.10
  -5  -3   1    0.61    0.11
  -5  -3   1    0.47    0.09
   4   3  -1    0.30    0.08
  -4  -3   1    0.34    0.08
  -4  -3   1    0.40    0.03
  -4  -3   1    0.39    0.03
  -4  -3   1    0.34    0.07
   3   3  -1   31.58    0.54
   3   3  -1   30.94    0.53
   3   3  -1   32.34    0.60
  -3  -3   1   32.61    0.54
  -3  -3   1   32.07    0.60
  -3  -3   1   31.60    0.54
  -3  -3   1   32.41    0.59
   2   3  -1    9.59    0.22
   2   3  -1    9.46    0.20
  -2  -3   1    9.32    0.20
  -2  -3   1    9.67    0.22
  -2  -3   1    9.30    0.28
  -2  -3   1    9.46    0.20
  -2  -3   1    9.55    0.20
   1   3  -1    3.24    0.09
   1   3  -1    3.19    0.11
   1   3  -1    3.33    0.11
   1   3  -1    3.55    0.15
  -1  -3   1    3.46    0.12
  -1  -3   1    3.26    0.09
  -1  -3   1    3.47    0.15
  -1  -3   1    3.32    0.10
  -1  -3   1    3.21    0.11
   0   3  -1   85.04    1.55
   0   3  -1   82.86    1.44
   0   3  -1   84.84    1.42
   0   3  -1   87.65    1.42
   0   3  -1   85.81    1.42
   0  -3   1   86.78    1.54
   0  -3   1   86.10    1.42
   0  -3   1   86.02    1.59
   0  -3   1   86.78    1.43
  -1   3  -1    0.27    0.06
  -1   3  -1    0.20    0.05
  -1   3  -1    0.10    0.04
  -1   3  -1    0.19    0.05
  -1   3  -1    0.18    0.06
   1  -3   1    0.15    0.05
   1  -3   1    0.23    0.05
   1  -3   1    0.21    0.07
   1  -3   1    0.19    0.06
  -2   3  -1    1.83    0.11
  -2   3  -1    1.67    0.12
  -2   3  -1    2.12    0.11
  -2   3  -1    1.73    0.13
  -2   3  -1    1.82    0.12
   2  -3   1    1.80    0.11
   2  -3   1    1.86    0.12
   2  -3   1    2.04    0.12
   2  -3   1    2.03    0.10
  -3   3  -1   26.09    0.53
  -3   3  -1   25.84    0.52
  -3   3  -1   26.94    0.49
  -3   3  -1   26.91    0.53
  -3   3  -1   27.34    0.55
   3  -3   1   26.95    0.55
   3  -3   1   26.30    0.50
   3  -3   1   25.88    0.52
   3  -3   1   26.71    0.52
  -4   3  -1    0.22    0.08
  -4   3  -1    0.16    0.08
  -4   3  -1    0.28    0.07
  -4   3  -1    0.30    0.06
  -4   3  -1    0.40    0.09
   4  -3   1    0.26    0.07
   4  -3   1    0.29    0.07
   4  -3   1    0.31    0.09
   4  -3   1    0.25    0.07
  -5   3  -1  116.18    1.94
  -5   3  -1  119.99    2.03
  -5   3  -1  112.84    2.02
  -5   3  -1  117.26    1.96
  -5   3  -1  113.83    1.96
   5  -3   1  119.11    2.04
   5  -3   1  115.46    1.95
   5  -3   1  116.09    1.97
  -6   3  -1   27.40    0.58
  -6   3  -1   27.95    0.65
  -6   3  -1   28.64    0.66
  -6   3  -1   28.00    0.58
  -6   3  -1   27.70    0.64
  -6   3  -1   28.67    0.57
   6  -3   1   27.36    0.56
   6  -3   1   27.85    0.58
   6  -3   1   28.09    0.66
  -7   3  -1   10.79    0.31
  -7   3  -1   10.88    0.38
  -7   3  -1   11.78    0.39
  -7   3  -1   11.19    0.38
  -7   3  -1   10.31    0.31
  -7   3  -1   11.21    0.32
   7  -3   1   10.72    0.31
   7  -3   1   11.02    0.39
   7  -3   1   11.32    0.30
  -8   3  -1    8.21    0.28
  -8   3  -1    8.28    0.27
  -8   3  -1    8.60    0.28
  -8   3  -1    8.59    0.35
  -8   3  -1    8.66    0.35
   8  -3   1    8.15    0.31
   8  -3   1    8.49    0.26
  -9   3  -1    0.73    0.11
  -9   3  -1    0.70    0.16
  -9   3  -1    0.69    0.12
  -9   3  -1    0.87    0.16
  -9   3  -1    0.83    0.12
   9  -3   1    0.83    0.10
 -10   3  -1    1.58    0.17
 -10   3  -1    1.27    0.19
 -10   3  -1    1.24    0.13
 -10   3  -1    1.27    0.20
 -10   3  -1    1.55    0.15
 -11   3  -1    3.69    0.21
 -11   3  -1    3.80    0.22
 -11   3  -1    3.91    0.31
 -11   3  -1    3.65    0.30
 -11   3  -1    4.16    0.24
 -12   3  -1    0.12    0.15
 -12   3  -1    0.25    0.19
 -12   3  -1    0.40    0.12
 -12   3  -1    0.49    0.13
 -12   3  -1    0.29    0.11
  12  -3   1    0.46    0.11
 -13   3  -1    0.64    0.21
 -13   3  -1    0.97    0.14
 -13   3  -1    1.14    0.22
 -14   3  -1    0.01    0.18
 -14   3  -1   -0.04    0.10
 -14   3  -1    0.06    0.19
 -15   3  -1    2.39    0.33
 -15   3  -1    2.37    0.20
 -15   3  -1    2.27    0.32
 -16   3  -1    0.02    0.10
 -16   3  -1    0.24    0.21
 -16   3  -1    0.12    0.21
 -17   3  -1    0.13    0.21
 -17   3  -1   -0.06    0.11
 -17   3  -1    0.03    0.21
 -17  -2   1    0.88    0.25
 -17  -2   1    0.60    0.26
 -16  -2   1    1.46    0.29
 -16  -2   1    1.65    0.27
 -16  -2   1    1.72    0.27
 -15  -2   1    0.21    0.18
 -15  -2   1    0.10    0.19
 -15  -2   1    0.10    0.18
 -14  -2   1    1.87    0.26
 -14  -2   1    1.95    0.27
 -14  -2   1    1.87    0.26
 -13  -2   1    4.78    0.35
 -13  -2   1    4.82    0.35
 -12  -2   1    4.95    0.36
 -12  -2   1    4.62    0.32
 -11  -2   1    3.91    0.11
 -11  -2   1    3.95    0.31
 -11  -2   1    3.98    0.11
 -11  -2   1    3.86    0.29
 -10  -2   1    5.45    0.14
 -10  -2   1    5.90    0.32
 -10  -2   1    5.51    0.32
 -10  -2   1    5.72    0.13
  -9  -2   1   11.67    0.24
  -9  -2   1   12.83    0.43
  -9  -2   1   12.43    0.23
  -9  -2   1   12.21    0.43
  -8  -2   1   17.66    0.50
  -8  -2   1   16.99    0.49
  -8  -2   1   17.64    0.51
  -8  -2   1   18.06    0.31
  -8  -2   1   17.07    0.31
  -7  -2   1   22.40    0.56
  -7  -2   1   22.54    0.56
  -7  -2   1   22.14    0.38
  -7  -2   1   22.46    0.56
   6   2  -1   25.25    0.59
  -6  -2   1   24.53    0.58
  -6  -2   1   27.16    0.42
  -6  -2   1   25.60    0.59
   5   2  -1    2.25    0.16
  -5  -2   1    2.23    0.15
  -5  -2   1    2.62    0.17
  -5  -2   1    2.32    0.15
   4   2  -1   62.54    1.10
  -4  -2   1   59.99    1.09
   3   2  -1  609.23   10.50
  -3  -2   1  641.98   10.51
   2   2  -1   15.39    0.26
   2   2  -1   14.70    0.26
   2   2  -1   14.93    0.30
  -2  -2   1   15.20    0.26
  -2  -2   1   15.11    0.30
  -2  -2   1   14.53    0.33
  -2  -2   1   14.87    0.26
   1   2  -1    5.66    0.12
   1   2  -1    5.56    0.16
  -1  -2   1    5.79    0.13
  -1  -2   1    5.60    0.16
  -1  -2   1    5.83    0.12
  -1  -2   1    5.71    0.12
   0   2  -1   55.04    1.00
   0   2  -1   54.48    0.92
   0  -2   1   59.66    0.96
   0  -2   1   56.93    0.95
   0  -2   1   52.93    0.93
  -1   2  -1    1.37    0.07
  -1   2  -1    1.29    0.07
  -1   2  -1    1.32    0.07
  -1   2  -1    1.35    0.08
   1  -2   1    1.28    0.07
   1  -2   1    1.38    0.07
   1  -2   1    1.34    0.08
  -2   2  -1    0.70    0.07
  -2   2  -1    0.69    0.07
  -2   2  -1    0.86    0.09
  -2   2  -1    0.52    0.06
  -2   2  -1    0.60    0.07
   2  -2   1    0.57    0.06
   2  -2   1    0.71    0.06
   2  -2   1    0.63    0.07
   2  -2   1    0.71    0.08
  -3   2  -1   70.20    1.19
  -3   2  -1   68.75    1.22
  -3   2  -1   71.24    1.23
  -3   2  -1   70.26    1.19
  -3   2  -1   69.49    1.19
   3  -2   1   69.75    1.19
   3  -2   1   69.03    1.18
   3  -2   1   71.25    1.23
   3  -2   1   71.13    1.20
  -4   2  -1   77.63    1.34
  -4   2  -1   79.48    1.40
  -4   2  -1   80.30    1.40
  -4   2  -1   78.35    1.34
  -4   2  -1   81.18    1.36
   4  -2   1   78.89    1.40
   4  -2   1   76.80    1.34
   4  -2   1   78.54    1.33
  -5   2  -1    1.42    0.14
  -5   2  -1    1.63    0.12
  -5   2  -1    1.48    0.12
  -5   2  -1    1.49    0.11
  -5   2  -1    1.37    0.13
   5  -2   1    1.46    0.14
   5  -2   1    1.56    0.11
   5  -2   1    1.49    0.11
  -6   2  -1   24.31    0.50
  -6   2  -1   25.31    0.51
  -6   2  -1   24.24    0.59
  -6   2  -1   25.21    0.59
  -6   2  -1   24.49    0.59
  -6   2  -1   25.01    0.55
   6  -2   1   24.70    0.49
   6  -2   1   25.42    0.61
   6  -2   1   24.03    0.51
  -7   2  -1    1.46    0.16
  -7   2  -1    1.34    0.17
  -7   2  -1    1.21    0.14
  -7   2  -1    1.97    0.19
  -7   2  -1    1.23    0.11
  -7   2  -1    1.42    0.12
   7  -2   1    1.17    0.10
   7  -2   1    1.39    0.12
   7  -2   1    1.26    0.16
  -8   2  -1    5.89    0.30
  -8   2  -1    6.67    0.27
  -8   2  -1    5.92    0.30
  -8   2  -1    6.09    0.22
  -8   2  -1    5.82    0.22
   8  -2   1    5.87    0.22
  -9   2  -1    0.68    0.16
  -9   2  -1    0.75    0.13
  -9   2  -1    0.47    0.09
  -9   2  -1    0.46    0.14
  -9   2  -1    0.52    0.09
 -10   2  -1    0.88    0.12
 -10   2  -1    0.78    0.16
 -10   2  -1    0.90    0.18
 -10   2  -1    1.00    0.15
 -10   2  -1    0.75    0.11
  10  -2   1    0.91    0.10
 -11   2  -1    0.19    0.14
 -11   2  -1    0.20    0.15
 -11   2  -1    0.22    0.09
 -11   2  -1    0.17    0.11
 -11   2  -1    0.18    0.09
  11  -2   1    0.39    0.09
 -12   2  -1    0.82    0.15
 -12   2  -1    0.66    0.12
 -12   2  -1    0.92    0.20
 -12   2  -1    0.61    0.20
 -12   2  -1    0.56    0.11
  12  -2   1    0.82    0.11
 -13   2  -1    1.24    0.24
 -13   2  -1    1.76    0.16
 -13   2  -1    1.65    0.26
 -14   2  -1    2.03    0.17
 -14   2  -1    1.84    0.28
 -14   2  -1    2.25    0.30
 -15   2  -1    0.02    0.20
 -15   2  -1    0.17    0.22
 -15   2  -1   -0.03    0.09
 -16   2  -1   -0.03    0.09
 -16   2  -1   -0.06    0.21
 -16   2  -1    0.00    0.20
 -17   2  -1    0.69    0.26
 -17   2  -1    0.90    0.13
 -17   2  -1    0.54    0.24
 -17  -1   1    0.02    0.22
 -17  -1   1    0.01    0.19
 -16  -1   1   -0.07    0.19
 -16  -1   1    0.24    0.18
 -16  -1   1    0.00    0.19
 -15  -1   1    0.25    0.18
 -15  -1   1    0.02    0.19
 -15  -1   1   -0.12    0.17
 -14  -1   1    0.17    0.18
 -14  -1   1    0.10    0.18
 -14  -1   1    0.02    0.05
 -14  -1   1    0.05    0.06
 -14  -1   1    0.21    0.16
 -13  -1   1    4.68    0.35
 -13  -1   1    4.49    0.15
 -13  -1   1    4.08    0.34
 -13  -1   1    4.37    0.16
 -12  -1   1    1.67    0.24
 -12  -1   1    1.70    0.11
 -12  -1   1    1.50    0.23
 -12  -1   1    1.40    0.11
 -11  -1   1   28.91    0.54
 -11  -1   1   29.64    0.79
 -11  -1   1   29.69    0.56
 -11  -1   1   30.17    0.80
 -10  -1   1    0.31    0.13
 -10  -1   1    0.30    0.06
 -10  -1   1    0.36    0.06
 -10  -1   1    0.37    0.13
   9   1  -1    3.17    0.09
   9   1  -1    3.08    0.09
  -9  -1   1    3.41    0.25
  -9  -1   1    2.90    0.11
  -9  -1   1    3.06    0.24
   8   1  -1   45.68    0.76
   8   1  -1   46.39    0.77
  -8  -1   1   46.29    0.97
  -8  -1   1   45.93    0.78
  -8  -1   1   43.98    0.97
  -8  -1   1   45.69    0.97
   7   1  -1   18.26    0.33
   7   1  -1   17.92    0.32
  -7  -1   1   18.48    0.50
  -7  -1   1   17.07    0.48
  -7  -1   1   17.90    0.48
  -7  -1   1   18.00    0.33
   6   1  -1   40.02    0.66
   6   1  -1   39.44    0.65
   6   1  -1   39.61    0.82
  -6  -1   1   38.51    0.81
  -6  -1   1   40.19    0.82
  -6  -1   1   40.10    0.67
   5   1  -1   11.95    0.21
   5   1  -1   12.55    0.34
   5   1  -1   12.24    0.22
  -5  -1   1   11.98    0.22
  -5  -1   1   11.83    0.33
  -5  -1   1   11.85    0.34
   4   1  -1  130.50    2.02
   4   1  -1  121.01    2.08
  -4  -1   1  122.29    2.03
  -4  -1   1  120.18    2.08
  -4  -1   1  124.44    2.09
   3   1  -1  199.79    3.45
  -3  -1   1  196.88    3.46
   2   1  -1    0.05    0.04
  -2  -1   1    0.04    0.04
  -2  -1   1    0.06    0.04
  -1  -1   1   25.82    0.46
  -1  -1   1   26.37    0.46
  -1  -1   1   29.02    0.44
  -1  -1   1   25.20    0.45
   0  -1   1   -0.01    0.01
   0  -1   1    0.01    0.01
  -1   1  -1   24.20    0.43
  -1   1  -1   23.67    0.42
  -1   1  -1   23.92    0.43
  -1   1  -1   23.76    0.42
   1  -1   1   24.55    0.43
   1  -1   1   24.56    0.43
   1  -1   1   24.50    0.42
  -2   1  -1   37.98    0.65
  -2   1  -1   37.91    0.68
  -2   1  -1   37.63    0.68
  -2   1  -1   36.98    0.65
  -2   1  -1   38.72    0.68
   2  -1   1   38.37    0.68
   2  -1   1   38.53    0.68
   2  -1   1   37.54    0.65
   2  -1   1   37.85    0.65
  -3   1  -1   66.08    1.16
  -3   1  -1   66.51    1.11
  -3   1  -1   66.28    1.11
  -3   1  -1   67.14    1.17
   3  -1   1   65.24    1.11
   3  -1   1   66.26    1.16
   3  -1   1   68.38    1.17
   3  -1   1   65.74    1.11
  -4   1  -1  101.54    1.70
  -4   1  -1  104.46    1.77
  -4   1  -1  103.63    1.77
  -4   1  -1  102.68    1.70
   4  -1   1  103.11    1.78
   4  -1   1  102.27    1.70
  -5   1  -1    4.48    0.22
  -5   1  -1    4.26    0.21
  -5   1  -1    4.33    0.15
  -5   1  -1    4.76    0.22
  -5   1  -1    4.53    0.15
   5  -1   1    4.66    0.15
   5  -1   1    4.65    0.21
  -6   1  -1    2.59    0.13
  -6   1  -1    2.39    0.19
  -6   1  -1    2.69    0.19
  -6   1  -1    2.27    0.19
  -6   1  -1    2.33    0.12
   6  -1   1    2.43    0.19
   6  -1   1    2.24    0.12
  -7   1  -1    0.92    0.09
  -7   1  -1    1.11    0.10
  -7   1  -1    0.85    0.15
  -7   1  -1    1.13    0.17
  -7   1  -1    0.99    0.14
   7  -1   1    0.93    0.08
   7  -1   1    0.99    0.15
   7  -1   1    1.11    0.10
  -8   1  -1   29.69    0.59
  -8   1  -1   29.61    0.72
  -8   1  -1   29.04    0.58
  -8   1  -1   29.30    0.72
   8  -1   1   29.70    0.58
   8  -1   1   30.48    0.59
   8  -1   1   29.99    0.74
  -9   1  -1    1.25    0.18
  -9   1  -1    1.03    0.11
  -9   1  -1    1.05    0.10
  -9   1  -1    1.11    0.17
   9  -1   1    1.04    0.10
   9  -1   1    1.38    0.15
 -10   1  -1    1.78    0.14
 -10   1  -1    1.51    0.19
 -10   1  -1    1.33    0.20
 -10   1  -1    1.55    0.13
  10  -1   1    1.66    0.12
 -11   1  -1    1.92    0.24
 -11   1  -1    1.59    0.21
 -11   1  -1    2.24    0.22
 -11   1  -1    1.81    0.16
 -11   1  -1    2.09    0.15
  11  -1   1    1.97    0.14
 -12   1  -1    0.08    0.14
 -12   1  -1    0.02    0.08
 -12   1  -1    0.01    0.08
 -12   1  -1   -0.11    0.16
  12  -1   1    0.12    0.08
 -13   1  -1    1.94    0.16
 -13   1  -1    2.11    0.30
 -13   1  -1    1.77    0.25
 -14   1  -1    4.17    0.21
 -14   1  -1    4.16    0.37
 -14   1  -1    4.10    0.37
 -15   1  -1    0.12    0.20
 -15   1  -1    0.17    0.09
 -15   1  -1    0.23    0.19
 -16   1  -1    2.37    0.18
 -16   1  -1    2.31    0.34
 -16   1  -1    2.48    0.34
 -17   1  -1   -0.08    0.22
 -17   1  -1    0.14    0.10
 -17   1  -1    0.01    0.21
 -17   0   1    1.95    0.31
 -17   0   1    1.81    0.31
 -16   0   1    0.32    0.19
 -16   0   1   -0.16    0.20
 -16   0   1   -0.05    0.06
 -15   0   1    5.07    0.40
 -15   0   1    5.05    0.19
 -15   0   1    4.92    0.40
 -15   0   1    5.49    0.37
 -14   0   1    3.50    0.31
 -14   0   1    3.02    0.15
 -14   0   1    2.66    0.29
 -14   0   1    2.70    0.31
 -13   0   1   11.11    0.29
 -13   0   1   11.20    0.50
 -13   0   1   11.68    0.51
 -13   0   1   11.22    0.31
  12   0  -1    0.32    0.06
 -12   0   1    0.23    0.18
 -12   0   1    0.18    0.07
 -12   0   1    0.37    0.16
 -12   0   1    0.22    0.07
  11   0  -1    5.80    0.17
  11   0  -1    5.99    0.22
 -11   0   1    5.87    0.19
 -11   0   1    5.75    0.20
 -11   0   1    5.73    0.34
 -11   0   1    6.03    0.37
  10   0  -1    8.65    0.22
  10   0  -1    8.74    0.21
 -10   0   1    8.13    0.22
 -10   0   1    8.18    0.37
 -10   0   1    7.90    0.23
 -10   0   1    8.84    0.39
   9   0  -1   24.84    0.47
   9   0  -1   24.44    0.46
  -9   0   1   24.52    0.65
  -9   0   1   24.39    0.48
  -9   0   1   23.76    0.66
   8   0  -1    0.04    0.04
   8   0  -1    0.06    0.05
  -8   0   1    0.02    0.11
  -8   0   1    0.02    0.11
  -8   0   1   -0.03    0.10
  -8   0   1    0.06    0.05
   7   0  -1    8.26    0.21
   7   0  -1    8.32    0.19
  -7   0   1    7.96    0.21
  -7   0   1    8.39    0.21
  -7   0   1    8.70    0.33
  -7   0   1    8.63    0.32
   6   0  -1   25.32    0.59
   6   0  -1   25.66    0.47
   6   0  -1   25.60    0.46
  -6   0   1   25.79    0.47
  -6   0   1   26.45    0.48
  -6   0   1   26.70    0.61
  -6   0   1   25.30    0.59
   5   0  -1    0.03    0.04
   5   0  -1   -0.03    0.08
   5   0  -1    0.03    0.03
  -5   0   1    0.06    0.04
  -5   0   1    0.04    0.04
  -5   0   1    0.08    0.08
  -5   0   1    0.00    0.08
   4   0  -1    2.52    0.09
   4   0  -1    2.74    0.16
   4   0  -1    2.45    0.09
  -4   0   1    2.55    0.16
  -4   0   1    2.55    0.10
  -4   0   1    2.59    0.15
   3   0  -1    5.01    0.17
   3   0  -1    4.98    0.12
  -3   0   1    4.98    0.13
  -3   0   1    5.00    0.17
  -3   0   1    5.06    0.18
  -3   0   1    5.21    0.13
   2   0  -1   32.38    0.56
   2   0  -1   31.31    0.53
  -2   0   1   32.10    0.53
  -2   0   1   31.33    0.53
  -2   0   1   31.66    0.54
  -2   0   1   31.75    0.56
   0   0  -1   -0.01    0.01
   0   0  -1    0.01    0.01
   0   0   1    0.01    0.01
   0   0   1   -0.01    0.01
  -1   0  -1   72.07    1.29
  -1   0  -1   77.74    1.25
  -1   0  -1   74.02    1.31
  -1   0  -1   70.82    1.30
   1   0   1   74.56    1.28
   1   0   1   79.08    1.30
   1   0   1   62.63    1.27
  -2   0  -1   41.20    0.70
  -2   0  -1   42.28    0.70
  -2   0  -1   42.02    0.74
  -2   0  -1   40.94    0.73
   2   0   1   42.21    0.70
   2   0   1   42.86    0.74
   2   0   1   42.06    0.74
  -3   0  -1  329.60    5.19
  -3   0  -1  303.03    4.99
  -3   0  -1  296.92    4.97
  -3   0  -1  286.98    5.20
   3   0   1  291.69    4.98
   3   0   1  288.69    5.20
   3   0   1  298.16    5.17
  -4   0  -1  129.82    2.18
  -4   0  -1  135.07    2.25
  -4   0  -1  129.08    2.10
  -4   0  -1  128.64    2.19
   4   0   1  121.95    2.10
   4   0   1  131.65    2.19
   4   0   1  129.89    2.19
  -5   0  -1   16.94    0.42
  -5   0  -1   16.60    0.33
  -5   0  -1   16.70    0.33
  -5   0  -1   16.07    0.41
  -5   0  -1   15.59    0.42
   5   0   1   16.33    0.42
   5   0   1   16.15    0.33
   5   0   1   15.88    0.32
  -6   0  -1   20.18    0.51
  -6   0  -1   20.88    0.51
  -6   0  -1   20.20    0.40
  -6   0  -1   20.44    0.40
  -6   0  -1   19.89    0.50
   6   0   1   19.57    0.39
   6   0   1   20.09    0.40
   6   0   1   20.22    0.51
  -7   0  -1   35.68    0.80
  -7   0  -1   37.43    0.68
  -7   0  -1   36.73    0.68
  -7   0  -1   35.87    0.82
  -7   0  -1   38.80    0.82
   7   0   1   35.54    0.67
   7   0   1   37.17    0.67
   7   0   1   39.09    0.83
  -8   0  -1   -0.01    0.11
  -8   0  -1    0.05    0.11
  -8   0  -1    0.04    0.06
  -8   0  -1   -0.01    0.05
   8   0   1   -0.03    0.05
   8   0   1    0.04    0.10
   8   0   1    0.02    0.05
  -9   0  -1   59.36    1.22
  -9   0  -1   58.77    1.04
  -9   0  -1   56.51    1.03
  -9   0  -1   60.37    1.23
   9   0   1   59.46    1.03
   9   0   1   58.54    1.03
 -10   0  -1   11.44    0.44
 -10   0  -1   12.08    0.31
 -10   0  -1   12.56    0.31
 -10   0  -1   13.18    0.47
  10   0   1   12.56    0.29
 -11   0  -1    3.98    0.18
 -11   0  -1    3.84    0.17
 -11   0  -1    3.71    0.32
 -11   0  -1    4.04    0.30
  11   0   1    3.64    0.15
 -12   0  -1    3.92    0.19
 -12   0  -1    3.70    0.34
 -12   0  -1    4.55    0.35
 -12   0  -1    3.95    0.18
  12   0   1    3.82    0.18
 -13   0  -1    4.34    0.19
 -13   0  -1    4.76    0.38
 -13   0  -1    4.67    0.40
 -14   0  -1    0.05    0.18
 -14   0  -1    0.36    0.18
 -14   0  -1    0.06    0.08
 -15   0  -1    0.26    0.20
 -15   0  -1    0.30    0.19
 -15   0  -1    0.35    0.09
 -16   0  -1    0.37    0.09
 -16   0  -1    0.51    0.21
 -16   0  -1    0.34    0.25
 -17   1   1    0.42    0.23
 -17   1   1    0.19    0.08
 -17   1   1    0.41    0.24
 -16   1   1    2.28    0.31
 -16   1   1    2.52    0.17
 -16   1   1    2.28    0.32
 -15   1   1    9.60    0.43
 -15   1   1    8.82    0.28
 -15   1   1    8.78    0.52
 -15   1   1    8.90    0.50
 -14   1   1   21.93    0.75
 -14   1   1   22.57    0.66
 -14   1   1   21.73    0.49
 -14   1   1   22.83    0.75
 -13   1   1    1.20    0.21
 -13   1   1    1.31    0.12
 -13   1   1    1.26    0.13
 -13   1   1    1.09    0.24
  12  -1  -1    4.96    0.18
 -12   1   1    4.76    0.20
 -12   1   1    5.05    0.37
 -12   1   1    5.07    0.35
 -12   1   1    4.96    0.21
  11  -1  -1    1.50    0.11
 -11   1   1    1.46    0.12
 -11   1   1    1.35    0.21
 -11   1   1    1.47    0.21
 -11   1   1    1.54    0.13
  10  -1  -1    5.71    0.18
  10  -1  -1    5.89    0.23
 -10   1   1    5.91    0.20
 -10   1   1    5.72    0.32
 -10   1   1    5.53    0.32
   9  -1  -1    4.17    0.15
   9  -1  -1    4.29    0.17
  -9   1   1    4.29    0.17
  -9   1   1    4.32    0.28
  -9   1   1    4.15    0.27
   8  -1  -1    3.12    0.13
   8  -1  -1    2.96    0.15
  -8   1   1    3.30    0.23
  -8   1   1    3.32    0.15
  -8   1   1    2.92    0.23
   7  -1  -1    7.41    0.31
   7  -1  -1    7.62    0.20
   7  -1  -1    7.65    0.22
  -7   1   1    7.40    0.30
  -7   1   1    7.45    0.33
  -7   1   1    7.47    0.22
  -7   1   1    7.47    0.22
   6  -1  -1    2.32    0.18
   6  -1  -1    2.10    0.17
   6  -1  -1    2.09    0.12
  -6   1   1    2.65    0.19
  -6   1   1    2.33    0.12
  -6   1   1    2.32    0.12
  -6   1   1    2.27    0.17
   5  -1  -1   76.11    1.39
   5  -1  -1   75.47    1.29
   5  -1  -1   75.08    1.37
  -5   1   1   76.82    1.29
  -5   1   1   77.09    1.30
  -5   1   1   77.87    1.39
  -5   1   1   77.93    1.37
   4  -1  -1  278.67    4.57
   4  -1  -1  268.48    4.75
   4  -1  -1  268.05    4.77
   4  -1  -1  227.77    4.47
  -4   1   1  273.17    4.37
  -4   1   1  289.77    4.92
  -4   1   1  274.27    4.67
   3  -1  -1    6.91    0.21
   3  -1  -1    6.96    0.18
   3  -1  -1    7.11    0.18
   3  -1  -1    7.11    0.21
  -3   1   1    7.26    0.21
  -3   1   1    7.04    0.18
  -3   1   1    7.77    0.22
  -3   1   1    6.89    0.18
   2  -1  -1   77.51    1.27
   2  -1  -1   77.96    1.29
   2  -1  -1   77.28    1.35
  -2   1   1   76.49    1.27
  -2   1   1   74.17    1.27
  -2   1   1   76.65    1.29
  -2   1   1   76.77    1.27
   0  -1  -1   13.87    0.25
   0  -1  -1   13.81    0.26
   0   1   1   13.20    0.26
  -1  -1  -1   23.43    0.42
  -1  -1  -1   24.33    0.41
  -1  -1  -1   24.17    0.42
  -1  -1  -1   24.05    0.43
   1   1   1   23.66    0.42
   1   1   1   23.31    0.41
   1   1   1   24.34    0.43
  -2  -1  -1    4.85    0.13
  -2  -1  -1    4.91    0.13
  -2  -1  -1    5.09    0.14
  -2  -1  -1    5.08    0.16
   2   1   1    4.88    0.15
   2   1   1    4.91    0.15
   2   1   1    4.78    0.12
  -3  -1  -1    0.09    0.06
  -3  -1  -1    0.08    0.07
  -3  -1  -1    0.14    0.04
  -3  -1  -1    0.08    0.04
   3   1   1    0.07    0.06
   3   1   1    0.14    0.04
   3   1   1    0.02    0.07
   3   1   1    0.16    0.04
  -4  -1  -1   34.92    0.70
  -4  -1  -1   35.90    0.70
  -4  -1  -1   34.60    0.61
  -4  -1  -1   36.18    0.69
  -4  -1  -1   35.84    0.61
   4   1   1   36.30    0.70
   4   1   1   34.30    0.70
   4   1   1   35.43    0.61
   4   1   1   34.95    0.61
  -5  -1  -1    0.24    0.09
  -5  -1  -1    0.24    0.04
  -5  -1  -1    0.20    0.05
  -5  -1  -1    0.20    0.08
  -5  -1  -1    0.22    0.09
   5   1   1    0.24    0.04
   5   1   1    0.21    0.08
   5   1   1    0.19    0.04
  -6  -1  -1   16.20    0.33
  -6  -1  -1   15.85    0.43
  -6  -1  -1   16.77    0.45
  -6  -1  -1   16.50    0.44
  -6  -1  -1   16.18    0.32
   6   1   1   15.84    0.44
   6   1   1   16.37    0.32
   6   1   1   15.86    0.32
  -7  -1  -1    4.81    0.15
  -7  -1  -1    5.38    0.26
  -7  -1  -1    4.34    0.25
  -7  -1  -1    4.85    0.15
  -7  -1  -1    4.69    0.24
   7   1   1    4.82    0.25
   7   1   1    4.83    0.15
   7   1   1    4.94    0.15
  -8  -1  -1   20.95    0.42
  -8  -1  -1   20.77    0.56
  -8  -1  -1   19.89    0.41
  -8  -1  -1   21.49    0.57
   8   1   1   20.92    0.41
   8   1   1   20.91    0.40
  -9  -1  -1    2.51    0.13
  -9  -1  -1    2.64    0.24
  -9  -1  -1    3.11    0.26
  -9  -1  -1    2.93    0.13
   9   1   1    2.97    0.12
   9   1   1    2.95    0.12
 -10  -1  -1    0.02    0.06
 -10  -1  -1    0.05    0.13
 -10  -1  -1    0.16    0.12
 -10  -1  -1    0.02    0.05
  10   1   1   -0.02    0.05
  10   1   1    0.02    0.04
 -11  -1  -1    2.54    0.26
 -11  -1  -1    2.10    0.23
 -11  -1  -1    2.68    0.14
 -11  -1  -1    2.60    0.14
  11   1   1    2.61    0.11
 -12  -1  -1    1.90    0.25
 -12  -1  -1    1.80    0.22
 -12  -1  -1    2.02    0.13
 -12  -1  -1    2.23    0.14
 -13  -1  -1   15.27    0.36
 -13  -1  -1   15.49    0.59
 -13  -1  -1   15.59    0.59
 -14  -1  -1    0.80    0.21
 -14  -1  -1    0.53    0.21
 -14  -1  -1    0.75    0.09
 -15  -1  -1    1.94    0.30
 -15  -1  -1    1.92    0.12
 -15  -1  -1    1.92    0.28
 -16  -1  -1    0.22    0.23
 -16  -1  -1    0.13    0.19
 -17   2   1    0.02    0.20
 -17   2   1    0.05    0.09
 -17   2   1    0.04    0.19
 -16   2   1    5.84    0.25
 -16   2   1    5.86    0.44
 -16   2   1    6.69    0.46
 -15   2   1    1.01    0.24
 -15   2   1    0.98    0.13
 -15   2   1    1.28    0.23
 -15   2   1    0.99    0.24
 -14   2   1    1.10    0.24
 -14   2   1    0.90    0.17
 -14   2   1    0.58    0.21
 -14   2   1    0.95    0.13
 -13   2   1    4.41    0.23
 -13   2   1    4.11    0.21
 -13   2   1    4.28    0.26
 -13   2   1    4.18    0.35
 -13   2   1    4.87    0.37
  12  -2  -1    0.17    0.08
 -12   2   1    0.23    0.16
 -12   2   1    0.46    0.12
 -12   2   1    0.28    0.09
 -12   2   1    0.27    0.16
 -12   2   1    0.20    0.09
  11  -2  -1    2.49    0.15
 -11   2   1    2.47    0.19
 -11   2   1    2.05    0.24
 -11   2   1    2.06    0.23
 -11   2   1    2.13    0.16
 -11   2   1    1.99    0.16
  10  -2  -1    5.60    0.20
 -10   2   1    5.58    0.22
 -10   2   1    5.29    0.32
 -10   2   1    5.39    0.32
   9  -2  -1   13.20    0.35
  -9   2   1   13.31    0.47
  -9   2   1   13.51    0.35
   8  -2  -1   21.04    0.46
   8  -2  -1   19.89    0.57
  -8   2   1   21.16    0.58
  -8   2   1   20.65    0.46
  -8   2   1   20.52    0.56
   7  -2  -1    3.64    0.17
   7  -2  -1    3.55    0.23
   7  -2  -1    3.61    0.15
  -7   2   1    3.56    0.22
  -7   2   1    3.23    0.17
  -7   2   1    3.44    0.17
  -7   2   1    3.82    0.24
   6  -2  -1    1.65    0.11
   6  -2  -1    1.47    0.15
   6  -2  -1    1.66    0.12
  -6   2   1    1.70    0.16
  -6   2   1    1.67    0.15
  -6   2   1    1.73    0.13
  -6   2   1    1.68    0.13
   5  -2  -1    8.37    0.28
   5  -2  -1    7.87    0.22
   5  -2  -1    8.43    0.27
   5  -2  -1    8.09    0.23
  -5   2   1    8.41    0.19
  -5   2   1    7.97    0.28
  -5   2   1    8.44    0.23
  -5   2   1    8.25    0.27
  -5   2   1    8.20    0.23
   4  -2  -1   80.84    1.41
   4  -2  -1   84.57    1.45
   4  -2  -1   81.46    1.47
   4  -2  -1   83.60    1.42
  -4   2   1   86.14    1.40
  -4   2   1   84.95    1.42
  -4   2   1   81.48    1.44
  -4   2   1   84.67    1.47
   3  -2  -1   74.57    1.30
   3  -2  -1   77.68    1.34
   3  -2  -1   78.91    1.32
   3  -2  -1   77.86    1.31
  -3   2   1   76.87    1.31
  -3   2   1   78.91    1.34
  -3   2   1   77.21    1.32
  -3   2   1   75.97    1.31
   2  -2  -1  104.26    1.73
   2  -2  -1  103.23    1.78
   2  -2  -1  103.53    1.72
  -2   2   1  103.72    1.72
  -2   2   1  106.15    1.82
  -2   2   1  104.03    1.72
  -2   2   1  104.38    1.73
   1  -2  -1    7.61    0.16
   1  -2  -1    7.29    0.15
   1  -2  -1    7.33    0.18
   1  -2  -1    7.07    0.19
  -1   2   1    7.25    0.14
  -1   2   1    7.11    0.18
  -1   2   1    7.19    0.19
  -1   2   1    7.19    0.16
   0  -2  -1   22.71    0.43
   0  -2  -1   22.87    0.40
   0  -2  -1   23.36    0.43
   0   2   1   22.39    0.42
   0   2   1   22.79    0.40
  -1  -2  -1   14.09    0.29
  -1  -2  -1   14.31    0.28
  -1  -2  -1   14.20    0.29
  -1  -2  -1   14.61    0.25
   1   2   1   14.92    0.28
   1   2   1   13.95    0.29
   1   2   1   14.28    0.29
  -2  -2  -1  267.07    4.61
  -2  -2  -1  261.41    4.50
  -2  -2  -1  258.98    4.51
  -2  -2  -1  275.46    4.46
   2   2   1  265.17    4.48
   2   2   1  269.83    4.67
  -3  -2  -1   14.35    0.29
  -3  -2  -1   14.65    0.33
  -3  -2  -1   14.57    0.29
  -3  -2  -1   14.50    0.32
   3   2   1   14.06    0.29
   3   2   1   14.20    0.28
   3   2   1   14.25    0.33
   3   2   1   14.51    0.32
  -4  -2  -1    0.11    0.06
  -4  -2  -1    0.21    0.08
  -4  -2  -1    0.21    0.05
  -4  -2  -1    0.14    0.04
  -4  -2  -1    0.17    0.08
   4   2   1    0.15    0.08
   4   2   1    0.21    0.04
   4   2   1    0.18    0.04
   4   2   1    0.15    0.07
  -5  -2  -1    2.11    0.17
  -5  -2  -1    2.27    0.16
  -5  -2  -1    2.23    0.16
  -5  -2  -1    2.20    0.10
  -5  -2  -1    2.28    0.09
   5   2   1    2.11    0.16
   5   2   1    2.28    0.10
   5   2   1    2.36    0.09
  -6  -2  -1   18.07    0.34
  -6  -2  -1   17.00    0.35
  -6  -2  -1   17.81    0.47
  -6  -2  -1   16.80    0.45
  -6  -2  -1   16.91    0.45
   6   2   1   18.05    0.34
   6   2   1   17.48    0.33
  -7  -2  -1    2.97    0.21
  -7  -2  -1    2.82    0.12
  -7  -2  -1    2.89    0.19
  -7  -2  -1    2.79    0.11
  -7  -2  -1    2.96    0.21
   7   2   1    3.08    0.11
   7   2   1    2.88    0.10
  -8  -2  -1    0.06    0.04
  -8  -2  -1    0.05    0.05
  -8  -2  -1    0.09    0.11
  -8  -2  -1    0.05    0.09
   8   2   1    0.02    0.04
   8   2   1    0.04    0.04
  -9  -2  -1   13.13    0.29
  -9  -2  -1   13.61    0.47
  -9  -2  -1   13.65    0.44
  -9  -2  -1   13.51    0.30
   9   2   1   13.60    0.27
   9   2   1   13.56    0.26
 -10  -2  -1   12.44    0.28
 -10  -2  -1   12.57    0.29
 -10  -2  -1   12.77    0.45
 -10  -2  -1   12.00    0.46
 -11  -2  -1    0.17    0.16
 -11  -2  -1    0.29    0.07
 -11  -2  -1    0.24    0.14
 -11  -2  -1    0.36    0.07
 -12  -2  -1    0.08    0.06
 -12  -2  -1    0.06    0.15
 -12  -2  -1    0.00    0.13
 -12  -2  -1    0.09    0.06
 -13  -2  -1    0.09    0.17
 -13  -2  -1    0.22    0.16
 -13  -2  -1    0.15    0.06
 -14  -2  -1    2.28    0.28
 -14  -2  -1    2.37    0.31
 -15  -2  -1    0.22    0.20
 -15  -2  -1    0.00    0.18
 -16  -2  -1    0.99    0.28
 -16  -2  -1    0.93    0.26
 -17   3   1    2.12    0.32
 -17   3   1    2.98    0.36
 -17   3   1    2.69    0.21
 -16   3   1    0.16    0.21
 -16   3   1    0.02    0.19
 -16   3   1    0.11    0.10
 -15   3   1    0.09    0.19
 -15   3   1    0.07    0.10
 -15   3   1    0.43    0.23
 -14   3   1    0.59    0.14
 -14   3   1    0.61    0.12
 -14   3   1    0.80    0.21
 -14   3   1    0.77    0.22
 -13   3   1    0.15    0.10
 -13   3   1    0.31    0.10
 -13   3   1    0.22    0.11
 -13   3   1    0.11    0.17
 -13   3   1    0.20    0.18
  12  -3  -1    0.00    0.07
 -12   3   1   -0.26    0.13
 -12   3   1   -0.01    0.15
 -12   3   1   -0.08    0.08
 -12   3   1    0.03    0.09
 -12   3   1    0.11    0.08
 -11   3   1    1.38    0.20
 -11   3   1    1.27    0.14
 -11   3   1    1.22    0.20
 -11   3   1    1.63    0.16
 -11   3   1    1.36    0.14
  10  -3  -1    1.02    0.11
 -10   3   1    0.97    0.17
 -10   3   1    0.99    0.11
 -10   3   1    1.06    0.13
 -10   3   1    0.94    0.17
   9  -3  -1    8.68    0.27
  -9   3   1    8.94    0.38
  -9   3   1    8.87    0.26
  -9   3   1    8.74    0.29
   8  -3  -1    0.47    0.10
   8  -3  -1    0.32    0.08
   8  -3  -1    0.23    0.11
  -8   3   1    0.57    0.14
  -8   3   1    0.33    0.09
  -8   3   1    0.37    0.13
  -8   3   1    0.39    0.07
   7  -3  -1   13.91    0.36
   7  -3  -1   13.49    0.34
   7  -3  -1   13.96    0.43
  -7   3   1   13.14    0.36
  -7   3   1   14.17    0.42
  -7   3   1   13.05    0.42
  -7   3   1   13.10    0.35
  -7   3   1   13.28    0.29
   6  -3  -1    8.83    0.25
   6  -3  -1    8.44    0.27
   6  -3  -1    8.54    0.32
  -6   3   1    8.51    0.30
  -6   3   1    8.64    0.32
  -6   3   1    8.21    0.18
  -6   3   1    8.76    0.27
  -6   3   1    8.70    0.26
   5  -3  -1   34.74    0.74
   5  -3  -1   34.68    0.68
   5  -3  -1   35.22    0.69
  -5   3   1   35.29    0.69
  -5   3   1   36.24    0.58
  -5   3   1   35.48    0.71
  -5   3   1   35.02    0.73
   4  -3  -1   14.64    0.36
   4  -3  -1   15.74    0.27
   4  -3  -1   16.07    0.39
   4  -3  -1   15.08    0.35
   4  -3  -1   15.82    0.37
  -4   3   1   15.91    0.27
  -4   3   1   15.15    0.36
  -4   3   1   15.32    0.38
  -4   3   1   15.09    0.36
   3  -3  -1   35.67    0.67
   3  -3  -1   34.93    0.68
   3  -3  -1   36.09    0.59
   3  -3  -1   34.77    0.65
   3  -3  -1   36.63    0.69
  -3   3   1   35.24    0.65
  -3   3   1   35.17    0.68
  -3   3   1   36.07    0.68
  -3   3   1   35.21    0.68
   2  -3  -1   89.43    1.45
   2  -3  -1   88.22    1.50
   2  -3  -1   88.36    1.48
  -2   3   1   86.52    1.45
  -2   3   1   88.82    1.48
  -2   3   1   89.02    1.50
  -2   3   1   86.80    1.50
   1  -3  -1    6.72    0.21
   1  -3  -1    6.72    0.14
   1  -3  -1    6.68    0.21
   1  -3  -1    6.92    0.16
  -1   3   1    6.79    0.16
  -1   3   1    6.71    0.21
  -1   3   1    6.57    0.13
  -1   3   1    6.50    0.17
  -1   3   1    6.80    0.21
   0  -3  -1   27.70    0.48
   0  -3  -1   26.49    0.52
   0  -3  -1   27.14    0.52
   0  -3  -1   27.70    0.45
   0   3   1   28.52    0.48
   0   3   1   27.31    0.46
   0   3   1   26.79    0.52
   0   3   1   27.08    0.52
  -1  -3  -1   47.75    0.79
  -1  -3  -1   46.00    0.81
  -1  -3  -1   45.75    0.82
   1   3   1   44.94    0.81
   1   3   1   46.30    0.79
   1   3   1   45.94    0.82
  -2  -3  -1   18.79    0.35
  -2  -3  -1   19.25    0.38
  -2  -3  -1   18.68    0.38
  -2  -3  -1   18.65    0.37
   2   3   1   18.22    0.37
   2   3   1   18.87    0.38
  -3  -3  -1   35.49    0.63
  -3  -3  -1   35.45    0.67
  -3  -3  -1   35.17    0.64
  -3  -3  -1   35.47    0.66
  -3  -3  -1   35.55    0.63
   3   3   1   33.66    0.62
   3   3   1   34.83    0.66
  -4  -3  -1   25.38    0.48
  -4  -3  -1   25.84    0.48
  -4  -3  -1   26.23    0.54
  -4  -3  -1   26.03    0.55
  -4  -3  -1   25.75    0.52
   4   3   1   25.31    0.46
   4   3   1   25.00    0.54
   4   3   1   25.46    0.48
  -5  -3  -1   59.23    1.09
  -5  -3  -1   58.94    1.00
  -5  -3  -1   58.48    0.99
  -5  -3  -1   56.37    1.10
  -5  -3  -1   59.54    1.08
   5   3   1   57.59    1.09
   5   3   1   58.13    0.99
   5   3   1   58.84    0.97
  -6  -3  -1   16.51    0.33
  -6  -3  -1   16.69    0.45
  -6  -3  -1   16.38    0.45
  -6  -3  -1   16.43    0.34
  -6  -3  -1   16.64    0.43
   6   3   1   16.53    0.32
   6   3   1   16.74    0.31
  -7  -3  -1    8.56    0.33
  -7  -3  -1    8.13    0.20
  -7  -3  -1    8.29    0.31
  -7  -3  -1    8.52    0.21
  -7  -3  -1    8.25    0.31
   7   3   1    8.29    0.18
   7   3   1    8.64    0.19
  -8  -3  -1    1.30    0.16
  -8  -3  -1    1.58    0.10
  -8  -3  -1    1.51    0.08
  -8  -3  -1    1.45    0.17
   8   3   1    1.43    0.06
   8   3   1    1.48    0.06
  -9  -3  -1    6.52    0.18
  -9  -3  -1    6.24    0.30
  -9  -3  -1    7.26    0.33
  -9  -3  -1    6.74    0.17
 -10  -3  -1    2.90    0.27
 -10  -3  -1    2.75    0.11
 -10  -3  -1    2.75    0.25
 -10  -3  -1    2.79    0.12
 -11  -3  -1   -0.11    0.12
 -11  -3  -1    0.02    0.05
 -11  -3  -1    0.01    0.13
 -11  -3  -1   -0.02    0.04
 -12  -3  -1   -0.16    0.13
 -12  -3  -1    0.09    0.17
 -13  -3  -1    5.97    0.41
 -13  -3  -1    6.10    0.38
 -14  -3  -1    0.43    0.20
 -14  -3  -1    0.32    0.16
 -15  -3  -1    0.21    0.20
 -15  -3  -1   -0.06    0.17
 -16  -3  -1   -0.13    0.19
 -16  -3  -1    0.35    0.21
 -16  -3  -1   -0.02    0.18
 -17   4   1    0.00    0.23
 -17   4   1   -0.05    0.10
 -17   4   1    0.14    0.21
 -16   4   1    0.64    0.14
 -16   4   1    0.32    0.21
 -16   4   1    0.55    0.24
 -15   4   1   13.21    0.42
 -15   4   1   13.27    0.60
 -15   4   1   13.22    0.60
 -14   4   1    0.78    0.14
 -14   4   1    1.55    0.27
 -14   4   1    1.12    0.15
 -14   4   1    0.95    0.24
 -13   4   1    4.20    0.36
 -13   4   1    4.12    0.36
 -13   4   1    4.04    0.25
  12  -4  -1   12.68    0.36
 -12   4   1   13.44    0.54
 -12   4   1   11.80    0.40
 -12   4   1   13.03    0.34
 -12   4   1   12.17    0.39
 -12   4   1   12.67    0.52
  11  -4  -1   13.24    0.37
 -11   4   1   13.82    0.40
 -11   4   1   13.23    0.51
 -11   4   1   13.22    0.50
 -11   4   1   13.98    0.42
 -11   4   1   13.26    0.33
  10  -4  -1    2.87    0.18
 -10   4   1    2.84    0.20
 -10   4   1    2.99    0.14
 -10   4   1    3.14    0.26
   9  -4  -1    7.77    0.27
  -9   4   1    7.58    0.20
  -9   4   1    7.84    0.36
  -9   4   1    7.54    0.28
   8  -4  -1   67.13    1.22
   8  -4  -1   66.82    1.26
  -8   4   1   67.22    1.34
  -8   4   1   65.74    1.31
  -8   4   1   65.68    1.24
  -8   4   1   66.95    1.12
   7  -4  -1   48.99    0.97
   7  -4  -1   51.34    1.05
   7  -4  -1   50.32    0.95
  -7   4   1   48.35    0.96
  -7   4   1   50.72    1.04
  -7   4   1   49.59    0.83
  -7   4   1   49.33    1.01
   6  -4  -1    0.28    0.10
   6  -4  -1    0.51    0.11
   6  -4  -1    0.31    0.09
  -6   4   1    0.41    0.11
  -6   4   1    0.51    0.05
  -6   4   1    0.24    0.11
  -6   4   1    0.26    0.09
   5  -4  -1    9.64    0.29
   5  -4  -1    9.49    0.18
   5  -4  -1    9.30    0.31
   5  -4  -1    9.55    0.28
  -5   4   1    9.13    0.31
  -5   4   1    8.84    0.28
  -5   4   1    9.03    0.28
  -5   4   1    9.46    0.18
   4  -4  -1   35.87    0.72
   4  -4  -1   35.97    0.71
   4  -4  -1   35.67    0.70
   4  -4  -1   35.01    0.60
  -4   4   1   35.09    0.71
  -4   4   1   36.29    0.71
  -4   4   1   35.52    0.69
  -4   4   1   35.59    0.71
   3  -4  -1  107.90    1.87
   3  -4  -1  109.06    1.80
   3  -4  -1  109.54    1.86
   3  -4  -1  112.55    1.87
  -3   4   1  110.34    1.83
  -3   4   1  108.29    1.87
  -3   4   1  110.37    1.87
  -3   4   1  108.87    1.85
   2  -4  -1    2.86    0.11
   2  -4  -1    2.33    0.13
   2  -4  -1    2.90    0.14
   2  -4  -1    2.90    0.17
   2  -4  -1    2.93    0.16
  -2   4   1    2.95    0.17
  -2   4   1    2.79    0.11
  -2   4   1    2.80    0.12
  -2   4   1    2.71    0.17
   1  -4  -1  267.14    4.44
   1  -4  -1  253.44    4.31
   1  -4  -1  266.49    4.64
   1  -4  -1  262.75    4.30
  -1   4   1  260.90    4.30
  -1   4   1  283.79    4.43
  -1   4   1  262.24    4.49
  -1   4   1  277.68    4.54
  -1   4   1  257.82    4.50
   0  -4  -1    0.01    0.07
   0  -4  -1    0.20    0.08
   0  -4  -1    0.09    0.05
   0  -4  -1    0.12    0.03
   0   4   1    0.09    0.07
   0   4   1    0.22    0.05
   0   4   1    0.18    0.08
   0   4   1    0.21    0.03
  -1  -4  -1    9.63    0.21
  -1  -4  -1    9.68    0.17
  -1  -4  -1    9.30    0.25
  -1  -4  -1    9.28    0.20
  -1  -4  -1    9.30    0.25
   1   4   1    9.42    0.25
   1   4   1    9.64    0.21
   1   4   1    9.15    0.25
  -2  -4  -1   23.42    0.46
  -2  -4  -1   23.17    0.46
  -2  -4  -1   22.91    0.41
  -2  -4  -1   22.95    0.44
  -2  -4  -1   22.57    0.44
   2   4   1   22.74    0.46
   2   4   1   22.55    0.44
   2   4   1   22.01    0.46
  -3  -4  -1   11.67    0.28
  -3  -4  -1   11.85    0.27
  -3  -4  -1   11.62    0.28
  -3  -4  -1   11.97    0.28
  -3  -4  -1   11.83    0.29
   3   4   1   11.33    0.29
   3   4   1   11.13    0.27
  -4  -4  -1   27.05    0.52
  -4  -4  -1   27.87    0.53
  -4  -4  -1   27.74    0.55
  -4  -4  -1   27.02    0.57
  -4  -4  -1   27.32    0.56
   4   4   1   27.03    0.57
   4   4   1   27.15    0.52
   4   4   1   26.80    0.51
  -5  -4  -1    2.92    0.13
  -5  -4  -1    2.58    0.16
  -5  -4  -1    3.33    0.18
  -5  -4  -1    2.79    0.19
  -5  -4  -1    2.84    0.13
   5   4   1    2.79    0.11
   5   4   1    3.00    0.12
   5   4   1    2.94    0.17
  -6  -4  -1    0.68    0.08
  -6  -4  -1    0.45    0.10
  -6  -4  -1    0.53    0.06
  -6  -4  -1    0.38    0.11
  -6  -4  -1    0.56    0.13
   6   4   1    0.63    0.06
   6   4   1    0.63    0.06
  -7  -4  -1    2.94    0.21
  -7  -4  -1    3.12    0.20
  -7  -4  -1    2.92    0.11
  -7  -4  -1    2.89    0.13
  -7  -4  -1    3.26    0.21
   7   4   1    3.01    0.09
   7   4   1    3.04    0.10
  -8  -4  -1    0.85    0.15
  -8  -4  -1    0.71    0.06
  -8  -4  -1    0.58    0.12
  -8  -4  -1    0.82    0.08
  -9  -4  -1    3.90    0.12
  -9  -4  -1    3.94    0.14
  -9  -4  -1    3.91    0.25
  -9  -4  -1    3.64    0.26
 -10  -4  -1    0.46    0.14
 -10  -4  -1    0.60    0.06
 -10  -4  -1    0.63    0.06
 -10  -4  -1    0.50    0.15
 -11  -4  -1    8.10    0.17
 -11  -4  -1    8.27    0.18
 -11  -4  -1    8.10    0.41
 -11  -4  -1    7.96    0.37
 -12  -4  -1    1.91    0.24
 -12  -4  -1    1.61    0.22
 -13  -4  -1    0.29    0.17
 -13  -4  -1    0.18    0.16
 -14  -4  -1    1.14    0.25
 -14  -4  -1    1.10    0.20
 -15  -4  -1    4.47    0.41
 -15  -4  -1    4.69    0.39
 -16  -4  -1    0.32    0.22
 -16  -4  -1   -0.19    0.18
 -16  -4  -1   -0.24    0.18
 -17   5   1    0.62    0.14
 -17   5   1    0.70    0.25
 -17   5   1    0.52    0.24
 -16   5   1    0.11    0.20
 -16   5   1    0.34    0.22
 -16   5   1   -0.04    0.12
 -15   5   1    1.22    0.26
 -15   5   1    0.65    0.22
 -15   5   1    0.64    0.15
 -14   5   1    9.00    0.36
 -14   5   1    8.98    0.49
 -14   5   1    9.45    0.50
 -13   5   1    2.83    0.24
 -13   5   1    2.44    0.31
 -13   5   1    2.89    0.32
  12  -5  -1    0.47    0.12
 -12   5   1    0.62    0.09
 -12   5   1    0.51    0.19
 -12   5   1    0.61    0.14
 -12   5   1    0.35    0.18
 -12   5   1    0.33    0.13
  11  -5  -1    0.09    0.09
 -11   5   1    0.10    0.11
 -11   5   1    0.17    0.06
 -11   5   1    0.09    0.14
 -11   5   1    0.06    0.10
 -11   5   1    0.09    0.14
  10  -5  -1    3.00    0.20
 -10   5   1    2.90    0.27
 -10   5   1    2.75    0.21
 -10   5   1    2.78    0.12
   9  -5  -1    4.91    0.23
  -9   5   1    4.66    0.14
  -9   5   1    4.53    0.25
  -9   5   1    5.06    0.31
   8  -5  -1   20.77    0.51
  -8   5   1   21.09    0.57
  -8   5   1   20.43    0.58
  -8   5   1   21.02    0.38
  -8   5   1   21.31    0.53
   7  -5  -1    6.78    0.28
   7  -5  -1    6.73    0.31
   7  -5  -1    6.78    0.27
  -7   5   1    7.60    0.33
  -7   5   1    7.46    0.16
  -7   5   1    6.94    0.29
  -7   5   1    6.71    0.28
   6  -5  -1   20.81    0.50
   6  -5  -1   20.57    0.51
   6  -5  -1   21.34    0.55
  -6   5   1   20.27    0.53
  -6   5   1   21.39    0.52
  -6   5   1   20.68    0.51
  -6   5   1   20.73    0.38
   5  -5  -1   77.77    1.44
   5  -5  -1   78.45    1.41
   5  -5  -1   79.49    1.43
   5  -5  -1   78.52    1.29
  -5   5   1   79.32    1.44
  -5   5   1   77.36    1.42
  -5   5   1   78.47    1.40
   4  -5  -1   27.63    0.61
   4  -5  -1   28.65    0.63
   4  -5  -1   28.71    0.52
   4  -5  -1   29.42    0.62
  -4   5   1   27.82    0.57
  -4   5   1   28.56    0.62
  -4   5   1   29.54    0.61
  -4   5   1   29.75    0.63
   3  -5  -1    0.72    0.10
   3  -5  -1    0.55    0.07
   3  -5  -1    0.57    0.10
   3  -5  -1    0.72    0.11
  -3   5   1    0.58    0.10
  -3   5   1    0.59    0.08
  -3   5   1    0.51    0.10
  -3   5   1    0.60    0.09
   2  -5  -1   19.99    0.41
   2  -5  -1   19.79    0.46
   2  -5  -1   19.51    0.46
   2  -5  -1   18.58    0.43
  -2   5   1   19.67    0.46
  -2   5   1   19.35    0.37
  -2   5   1   19.39    0.40
  -2   5   1   19.45    0.46
   1  -5  -1    0.67    0.06
   1  -5  -1    0.72    0.11
  -1   5   1    0.66    0.06
  -1   5   1    0.49    0.06
  -1   5   1    0.74    0.11
  -1   5   1    0.56    0.10
  -1   5   1    0.58    0.03
   0  -5  -1   70.01    1.16
   0  -5  -1   69.95    1.26
   0  -5  -1   70.23    1.26
   0  -5  -1   74.68    1.18
   0   5   1   69.58    1.26
   0   5   1   70.10    1.26
   0   5   1   70.89    1.18
   0   5   1   71.39    1.23
  -1  -5  -1    8.15    0.25
  -1  -5  -1    8.18    0.16
  -1  -5  -1    7.50    0.24
  -1  -5  -1    8.19    0.17
  -1  -5  -1    8.15    0.20
   1   5   1    8.31    0.25
   1   5   1    8.08    0.19
   1   5   1    7.86    0.24
  -2  -5  -1   18.44    0.42
  -2  -5  -1   19.14    0.43
  -2  -5  -1   19.06    0.38
  -2  -5  -1   19.28    0.38
   2   5   1   19.38    0.42
   2   5   1   19.41    0.42
   2   5   1   19.27    0.39
  -3  -5  -1    0.65    0.09
  -3  -5  -1    0.56    0.08
  -3  -5  -1    0.64    0.07
  -3  -5  -1    0.64    0.09
  -3  -5  -1    0.47    0.08
   3   5   1    0.74    0.09
   3   5   1    0.72    0.09
  -4  -5  -1   28.47    0.57
  -4  -5  -1   27.86    0.55
  -4  -5  -1   27.59    0.58
  -4  -5  -1   27.34    0.55
  -4  -5  -1   27.65    0.55
   4   5   1   27.45    0.53
   4   5   1   27.49    0.58
   4   5   1   27.44    0.54
  -5  -5  -1    4.77    0.20
  -5  -5  -1    4.82    0.22
  -5  -5  -1    4.76    0.18
  -5  -5  -1    5.14    0.21
  -5  -5  -1    4.98    0.18
   5   5   1    4.63    0.16
   5   5   1    4.67    0.22
   5   5   1    4.91    0.16
  -6  -5  -1    0.17    0.06
  -6  -5  -1    0.03    0.09
  -6  -5  -1    0.03    0.06
  -6  -5  -1    0.04    0.07
  -6  -5  -1    0.03    0.09
   6   5   1    0.07    0.04
   6   5   1    0.11    0.05
  -7  -5  -1    0.13    0.09
  -7  -5  -1    0.13    0.11
  -7  -5  -1    0.14    0.06
  -7  -5  -1    0.19    0.05
  -7  -5  -1    0.25    0.09
   7   5   1    0.11    0.04
   7   5   1    0.14    0.04
  -8  -5  -1    1.21    0.15
  -8  -5  -1    1.56    0.17
  -8  -5  -1    1.76    0.11
  -8  -5  -1    1.70    0.09
  -9  -5  -1    2.25    0.21
  -9  -5  -1    2.59    0.24
  -9  -5  -1    2.57    0.11
  -9  -5  -1    2.52    0.10
 -10  -5  -1    4.05    0.13
 -10  -5  -1    4.19    0.12
 -10  -5  -1    4.37    0.30
 -10  -5  -1    4.34    0.27
 -11  -5  -1    2.27    0.23
 -11  -5  -1    1.94    0.23
 -12  -5  -1   13.91    0.54
 -12  -5  -1   13.65    0.51
 -13  -5  -1    2.18    0.26
 -13  -5  -1    1.94    0.24
 -14  -5  -1    0.28    0.17
 -14  -5  -1    0.56    0.21
 -15  -5  -1   -0.06    0.20
 -15  -5  -1    0.34    0.22
 -15  -5  -1    0.12    0.17
 -17   6   1    4.62    0.46
 -17   6   1    4.55    0.30
 -17   6   1    4.91    0.45
 -16   6   1    0.16    0.21
 -16   6   1    0.25    0.24
 -16   6   1    0.45    0.15
 -15   6   1    1.12    0.26
 -15   6   1    1.61    0.29
 -15   6   1    1.50    0.20
 -14   6   1   -0.02    0.17
 -14   6   1    0.04    0.12
 -14   6   1    0.03    0.18
 -13   6   1    0.07    0.10
 -13   6   1    0.12    0.20
 -13   6   1    0.07    0.19
 -13   6   1   -0.04    0.12
  12  -6  -1    0.62    0.14
 -12   6   1    0.15    0.13
 -12   6   1    0.19    0.06
 -12   6   1    0.36    0.18
 -12   6   1    0.18    0.16
 -12   6   1    0.07    0.13
  11  -6  -1    2.14    0.20
 -11   6   1    1.67    0.20
 -11   6   1    1.48    0.18
 -11   6   1    1.40    0.08
 -11   6   1    1.51    0.22
 -11   6   1    1.65    0.23
  10  -6  -1    2.29    0.20
 -10   6   1    1.93    0.19
 -10   6   1    1.73    0.22
 -10   6   1    2.06    0.08
 -10   6   1    2.29    0.21
   9  -6  -1    0.54    0.12
  -9   6   1    0.25    0.13
  -9   6   1    0.78    0.16
   8  -6  -1    2.12    0.19
  -8   6   1    2.21    0.21
  -8   6   1    2.08    0.19
  -8   6   1    1.84    0.19
   7  -6  -1    0.14    0.10
   7  -6  -1    0.20    0.11
  -7   6   1    0.28    0.11
  -7   6   1    0.36    0.13
  -7   6   1    0.15    0.11
   6  -6  -1   38.20    0.66
   6  -6  -1   37.90    0.82
   6  -6  -1   37.56    0.83
   6  -6  -1   38.87    0.80
  -6   6   1   38.21    0.82
  -6   6   1   37.03    0.81
  -6   6   1   36.85    0.81
  -6   6   1   38.60    0.79
   5  -6  -1    0.42    0.11
   5  -6  -1    0.34    0.11
   5  -6  -1    0.31    0.11
   5  -6  -1    0.46    0.06
  -5   6   1    0.39    0.11
  -5   6   1    0.38    0.10
  -5   6   1    0.39    0.12
  -5   6   1    0.37    0.10
   4  -6  -1    5.36    0.22
   4  -6  -1    5.04    0.17
   4  -6  -1    5.28    0.25
   4  -6  -1    5.32    0.24
  -4   6   1    5.44    0.20
  -4   6   1    5.16    0.24
  -4   6   1    5.07    0.21
  -4   6   1    5.18    0.24
   3  -6  -1    7.44    0.28
   3  -6  -1    7.75    0.25
   3  -6  -1    7.27    0.23
   3  -6  -1    7.28    0.27
  -3   6   1    7.42    0.21
  -3   6   1    7.69    0.24
  -3   6   1    7.32    0.28
  -3   6   1    8.03    0.29
   2  -6  -1    7.04    0.25
   2  -6  -1    6.99    0.26
   2  -6  -1    7.30    0.22
   2  -6  -1    7.35    0.27
  -2   6   1    7.00    0.20
  -2   6   1    7.85    0.27
  -2   6   1    7.12    0.27
  -2   6   1    6.83    0.17
   1  -6  -1    6.98    0.26
   1  -6  -1    7.29    0.27
   1  -6  -1    7.34    0.19
  -1   6   1    7.37    0.18
  -1   6   1    7.48    0.19
  -1   6   1    7.06    0.26
  -1   6   1    7.12    0.26
   0  -6  -1   10.34    0.23
   0  -6  -1   10.50    0.22
   0  -6  -1   10.32    0.31
   0   6   1   10.20    0.21
   0   6   1    9.83    0.30
   0   6   1   10.16    0.31
   0   6   1   10.45    0.23
  -1  -6  -1    8.30    0.17
  -1  -6  -1    8.19    0.27
  -1  -6  -1    8.19    0.20
  -1  -6  -1    8.36    0.17
  -1  -6  -1    8.55    0.28
   1   6   1    7.97    0.26
   1   6   1    8.33    0.27
   1   6   1    8.53    0.20
  -2  -6  -1    0.06    0.05
  -2  -6  -1    0.07    0.03
  -2  -6  -1   -0.02    0.07
  -2  -6  -1   -0.02    0.07
  -2  -6  -1    0.14    0.06
   2   6   1    0.05    0.05
   2   6   1    0.08    0.07
   2   6   1    0.05    0.07
  -3  -6  -1    0.16    0.08
  -3  -6  -1    0.21    0.08
  -3  -6  -1    0.20    0.08
  -3  -6  -1    0.28    0.07
  -3  -6  -1    0.14    0.05
   3   6   1    0.18    0.08
   3   6   1    0.17    0.07
   3   6   1    0.12    0.07
  -4  -6  -1    3.02    0.16
  -4  -6  -1    2.94    0.15
  -4  -6  -1    3.04    0.14
  -4  -6  -1    2.67    0.16
  -4  -6  -1    2.97    0.16
   4   6   1    2.96    0.15
   4   6   1    2.93    0.17
  -5  -6  -1    3.48    0.19
  -5  -6  -1    3.33    0.17
  -5  -6  -1    3.48    0.16
  -5  -6  -1    3.42    0.16
  -5  -6  -1    3.36    0.18
   5   6   1    3.33    0.15
   5   6   1    3.31    0.15
   5   6   1    3.22    0.18
  -6  -6  -1    1.12    0.10
  -6  -6  -1    1.16    0.13
  -6  -6  -1    1.17    0.10
  -6  -6  -1    1.01    0.14
  -6  -6  -1    0.91    0.11
   6   6   1    1.13    0.10
   6   6   1    1.02    0.09
  -7  -6  -1   12.86    0.31
  -7  -6  -1   13.00    0.40
  -7  -6  -1   13.63    0.39
  -7  -6  -1   12.64    0.31
  -7  -6  -1   13.17    0.41
   7   6   1   13.37    0.29
   7   6   1   13.31    0.27
  -8  -6  -1   12.00    0.28
  -8  -6  -1   12.01    0.29
  -8  -6  -1   12.07    0.40
  -8  -6  -1   11.35    0.38
   8   6   1   12.21    0.23
   8   6   1   12.33    0.23
  -9  -6  -1    8.91    0.21
  -9  -6  -1    9.21    0.37
  -9  -6  -1    8.41    0.34
  -9  -6  -1    8.51    0.22
 -10  -6  -1    0.33    0.15
 -10  -6  -1    0.30    0.12
 -10  -6  -1    0.35    0.05
 -11  -6  -1    4.11    0.31
 -11  -6  -1    4.45    0.31
 -12  -6  -1    0.38    0.15
 -12  -6  -1    0.24    0.17
 -13  -6  -1    5.59    0.38
 -13  -6  -1    4.82    0.34
 -14  -6  -1    2.27    0.26
 -14  -6  -1    3.16    0.33
 -15  -6  -1   -0.07    0.19
 -15  -6  -1    0.35    0.22
 -15  -6  -1    0.08    0.17
 -17   7   1    0.08    0.21
 -17   7   1    0.04    0.14
 -17   7   1   -0.14    0.20
 -16   7   1    0.41    0.16
 -16   7   1    0.41    0.23
 -16   7   1    0.81    0.27
 -15   7   1    0.67    0.17
 -15   7   1    0.64    0.24
 -15   7   1    0.46    0.22
 -14   7   1    0.25    0.15
 -14   7   1    0.04    0.21
 -14   7   1    0.11    0.18
 -13   7   1   11.44    0.53
 -13   7   1   12.18    0.54
 -13   7   1   11.98    0.45
  12  -7  -1    9.61    0.37
 -12   7   1    9.90    0.47
 -12   7   1    9.21    0.41
 -12   7   1    8.44    0.45
 -12   7   1    8.87    0.39
  11  -7  -1    0.21    0.13
 -11   7   1    0.35    0.14
 -11   7   1   -0.01    0.15
 -11   7   1    0.00    0.12
  10  -7  -1    3.41    0.24
 -10   7   1    2.46    0.25
 -10   7   1    2.99    0.25
 -10   7   1    3.13    0.25
   9  -7  -1    0.09    0.12
  -9   7   1    0.05    0.12
  -9   7   1    0.08    0.12
  -9   7   1   -0.01    0.12
   8  -7  -1   22.98    0.58
  -8   7   1   23.78    0.61
  -8   7   1   22.54    0.60
  -8   7   1   23.48    0.62
  -8   7   1   21.62    0.62
   7  -7  -1    0.34    0.05
   7  -7  -1    0.46    0.13
  -7   7   1    0.25    0.12
  -7   7   1    0.43    0.13
  -7   7   1    0.41    0.13
  -7   7   1    0.47    0.13
   6  -7  -1    6.87    0.31
   6  -7  -1    7.35    0.31
   6  -7  -1    7.19    0.20
   6  -7  -1    8.00    0.32
  -6   7   1    7.63    0.32
  -6   7   1    7.99    0.33
  -6   7   1    7.42    0.30
  -6   7   1    7.63    0.29
   5  -7  -1   14.20    0.43
   5  -7  -1   13.46    0.31
   5  -7  -1   14.01    0.41
   5  -7  -1   14.14    0.42
  -5   7   1   13.25    0.39
  -5   7   1   13.81    0.43
  -5   7   1   13.96    0.37
  -5   7   1   14.28    0.44
   4  -7  -1   44.17    0.92
   4  -7  -1   44.54    0.82
   4  -7  -1   43.69    0.90
   4  -7  -1   43.11    0.88
  -4   7   1   44.02    0.82
  -4   7   1   44.73    0.92
  -4   7   1   42.08    0.90
  -4   7   1   43.59    0.86
   3  -7  -1   13.23    0.35
   3  -7  -1   12.70    0.35
   3  -7  -1   12.47    0.39
   3  -7  -1   13.25    0.39
  -3   7   1   12.88    0.33
  -3   7   1   12.60    0.39
  -3   7   1   12.96    0.29
  -3   7   1   13.26    0.39
   2  -7  -1    0.77    0.09
   2  -7  -1    0.80    0.13
   2  -7  -1    0.84    0.13
   2  -7  -1    0.91    0.14
  -2   7   1    0.70    0.08
  -2   7   1    0.79    0.06
  -2   7   1    0.74    0.13
  -2   7   1    0.98    0.14
  -2   7   1    0.84    0.08
   1  -7  -1    5.43    0.25
   1  -7  -1    5.83    0.18
   1  -7  -1    6.11    0.26
   1  -7  -1    5.67    0.26
  -1   7   1    5.83    0.17
  -1   7   1    5.63    0.17
  -1   7   1    5.64    0.25
  -1   7   1    5.80    0.25
   0  -7  -1   76.65    1.29
   0  -7  -1   78.03    1.28
   0  -7  -1   73.17    1.39
   0  -7  -1   77.35    1.41
   0   7   1   76.39    1.40
   0   7   1   77.81    1.28
   0   7   1   75.59    1.39
   0   7   1   76.62    1.27
  -1  -7  -1   90.13    1.46
  -1  -7  -1   92.18    1.52
  -1  -7  -1   89.75    1.63
  -1  -7  -1   93.60    1.52
   1   7   1   89.34    1.62
   1   7   1   91.42    1.63
   1   7   1   93.44    1.52
  -2  -7  -1   17.38    0.35
  -2  -7  -1   17.15    0.32
  -2  -7  -1   17.60    0.37
  -2  -7  -1   17.81    0.45
   2   7   1   18.20    0.44
   2   7   1   17.39    0.43
   2   7   1   17.56    0.37
  -3  -7  -1    0.11    0.08
  -3  -7  -1    0.23    0.08
  -3  -7  -1    0.18    0.09
  -3  -7  -1    0.11    0.07
  -3  -7  -1    0.16    0.04
   3   7   1    0.16    0.08
   3   7   1    0.07    0.07
   3   7   1    0.09    0.07
  -4  -7  -1    0.21    0.06
  -4  -7  -1    0.07    0.08
  -4  -7  -1    0.04    0.07
  -4  -7  -1    0.03    0.07
  -4  -7  -1    0.06    0.07
   4   7   1    0.02    0.07
   4   7   1    0.15    0.07
  -5  -7  -1    2.91    0.17
  -5  -7  -1    2.59    0.17
  -5  -7  -1    2.78    0.16
  -5  -7  -1    2.46    0.17
  -5  -7  -1    2.60    0.15
   5   7   1    2.61    0.18
   5   7   1    2.41    0.14
   5   7   1    2.46    0.14
  -6  -7  -1    0.83    0.10
  -6  -7  -1    1.08    0.14
  -6  -7  -1    0.90    0.12
  -6  -7  -1    0.71    0.10
  -6  -7  -1    0.95    0.11
   6   7   1    0.82    0.09
   6   7   1    0.88    0.09
  -7  -7  -1    2.41    0.20
  -7  -7  -1    2.19    0.19
  -7  -7  -1    2.35    0.18
  -7  -7  -1    2.37    0.14
   7   7   1    2.29    0.17
   7   7   1    2.53    0.12
  -8  -7  -1    0.05    0.06
  -8  -7  -1    0.01    0.09
  -8  -7  -1   -0.07    0.10
   8   7   1   -0.06    0.05
   8   7   1    0.00    0.04
  -9  -7  -1    0.66    0.14
  -9  -7  -1    0.65    0.07
  -9  -7  -1    0.71    0.14
 -10  -7  -1    0.17    0.12
 -10  -7  -1    0.31    0.06
 -10  -7  -1    0.38    0.15
 -10  -7  -1    0.29    0.05
 -11  -7  -1   16.44    0.53
 -11  -7  -1   17.19    0.57
 -12  -7  -1   -0.06    0.13
 -12  -7  -1   -0.24    0.14
 -13  -7  -1    4.22    0.34
 -13  -7  -1    4.63    0.36
 -14  -7  -1    1.48    0.26
 -14  -7  -1    2.04    0.33
 -14  -7  -1    1.38    0.26
 -15  -7  -1    0.24    0.22
 -15  -7  -1    0.05    0.20
 -17   8   1    1.02    0.21
 -17   8   1    0.76    0.25
 -17   8   1    0.89    0.26
 -16   8   1    2.97    0.36
 -16   8   1    2.72    0.35
 -16   8   1    2.36    0.25
 -15   8   1   -0.13    0.14
 -15   8   1    0.09    0.19
 -15   8   1    0.29    0.23
 -14   8   1    0.23    0.21
 -14   8   1    0.61    0.17
 -14   8   1    0.08    0.19
 -13   8   1    0.04    0.18
 -13   8   1    0.16    0.21
 -13   8   1    0.28    0.15
  12  -8  -1    0.26    0.14
 -12   8   1   -0.01    0.14
 -12   8   1    0.08    0.17
 -12   8   1    0.24    0.18
 -12   8   1    0.25    0.18
  11  -8  -1    0.51    0.15
 -11   8   1    0.70    0.18
 -11   8   1    0.44    0.16
 -11   8   1    0.90    0.20
  10  -8  -1    3.10    0.25
 -10   8   1    2.74    0.26
 -10   8   1    2.45    0.26
 -10   8   1    3.16    0.27
   9  -8  -1    0.33    0.13
  -9   8   1    0.35    0.14
  -9   8   1    0.70    0.16
  -9   8   1    0.36    0.15
   8  -8  -1    8.59    0.36
   8  -8  -1    8.67    0.21
  -8   8   1    8.72    0.37
  -8   8   1    9.17    0.38
  -8   8   1    8.30    0.37
  -8   8   1    8.38    0.40
   7  -8  -1   15.77    0.47
   7  -8  -1   15.86    0.33
  -7   8   1   15.28    0.49
  -7   8   1   14.92    0.47
  -7   8   1   16.12    0.50
  -7   8   1   15.82    0.45
   6  -8  -1    2.67    0.14
   6  -8  -1    2.38    0.21
   6  -8  -1    2.81    0.23
  -6   8   1    2.61    0.23
  -6   8   1    2.69    0.21
  -6   8   1    2.92    0.19
  -6   8   1    2.73    0.24
   5  -8  -1  105.90    1.91
   5  -8  -1  104.57    1.89
   5  -8  -1  102.17    1.87
   5  -8  -1  104.00    1.76
  -5   8   1  102.25    1.80
  -5   8   1  103.19    1.90
  -5   8   1  104.98    1.91
  -5   8   1  102.67    1.84
   4  -8  -1   39.82    0.79
   4  -8  -1   40.06    0.88
   4  -8  -1   38.28    0.85
   4  -8  -1   40.89    0.83
  -4   8   1   40.54    0.88
  -4   8   1   39.83    0.76
  -4   8   1   41.11    0.88
  -4   8   1   41.00    0.81
   3  -8  -1   31.94    0.67
   3  -8  -1   31.19    0.69
   3  -8  -1   32.69    0.74
   3  -8  -1   31.52    0.72
  -3   8   1   32.36    0.73
  -3   8   1   32.28    0.65
  -3   8   1   31.39    0.59
  -3   8   1   31.72    0.73
   2  -8  -1    3.03    0.22
   2  -8  -1    2.94    0.23
   2  -8  -1    3.04    0.16
   2  -8  -1    3.13    0.23
  -2   8   1    2.98    0.14
  -2   8   1    3.00    0.15
  -2   8   1    2.66    0.22
  -2   8   1    2.75    0.09
  -2   8   1    3.65    0.23
   1  -8  -1    0.10    0.11
   1  -8  -1    0.28    0.13
   1  -8  -1    0.20    0.12
   1  -8  -1    0.17    0.07
  -1   8   1    0.08    0.10
  -1   8   1    0.18    0.06
  -1   8   1    0.14    0.06
  -1   8   1    0.07    0.11
   0  -8  -1   12.28    0.27
   0  -8  -1   12.32    0.39
   0  -8  -1   12.02    0.43
   0  -8  -1   12.44    0.38
   0   8   1   12.37    0.27
   0   8   1   12.00    0.26
   0   8   1   11.83    0.37
   0   8   1   11.90    0.38
  -1  -8  -1    0.18    0.04
  -1  -8  -1    0.34    0.11
  -1  -8  -1    0.23    0.06
  -1  -8  -1    0.20    0.10
   1   8   1    0.20    0.06
   1   8   1    0.26    0.10
   1   8   1    0.14    0.10
  -2  -8  -1    3.10    0.10
  -2  -8  -1    3.07    0.11
  -2  -8  -1    3.06    0.14
  -2  -8  -1    3.19    0.20
   2   8   1    3.14    0.20
   2   8   1    2.81    0.19
   2   8   1    3.23    0.14
  -3  -8  -1   35.48    0.61
  -3  -8  -1   33.90    0.64
  -3  -8  -1   35.22    0.74
  -3  -8  -1   35.33    0.66
   3   8   1   34.48    0.67
   3   8   1   34.76    0.72
   3   8   1   33.86    0.73
  -4  -8  -1   18.26    0.46
  -4  -8  -1   18.43    0.39
  -4  -8  -1   18.59    0.37
  -4  -8  -1   18.30    0.42
  -4  -8  -1   18.92    0.42
   4   8   1   18.50    0.43
   4   8   1   17.99    0.44
  -5  -8  -1   11.90    0.31
  -5  -8  -1   11.83    0.33
  -5  -8  -1   12.26    0.35
  -5  -8  -1   12.24    0.34
   5   8   1   11.37    0.32
   5   8   1   12.09    0.35
  -6  -8  -1    1.68    0.15
  -6  -8  -1    1.77    0.17
  -6  -8  -1    1.62    0.14
  -6  -8  -1    1.65    0.16
   6   8   1    1.58    0.13
  -7  -8  -1    0.03    0.07
  -7  -8  -1    0.00    0.08
  -7  -8  -1   -0.03    0.09
  -7  -8  -1   -0.05    0.10
   7   8   1    0.01    0.06
  -8  -8  -1    3.05    0.23
  -8  -8  -1    2.94    0.16
  -8  -8  -1    2.86    0.16
  -8  -8  -1    2.87    0.21
   8   8   1    2.91    0.13
  -9  -8  -1    2.72    0.15
  -9  -8  -1    3.45    0.24
  -9  -8  -1    3.33    0.15
  -9  -8  -1    3.01    0.25
 -10  -8  -1    0.46    0.07
 -10  -8  -1    0.31    0.06
 -10  -8  -1    0.24    0.14
 -10  -8  -1    0.19    0.13
 -11  -8  -1    0.04    0.13
 -11  -8  -1    0.19    0.16
 -12  -8  -1   -0.12    0.13
 -12  -8  -1   -0.17    0.14
 -13  -8  -1    0.69    0.26
 -13  -8  -1    0.49    0.20
 -14  -8  -1    1.21    0.23
 -14  -8  -1    1.39    0.32
 -17   9   1    0.14    0.22
 -17   9   1   -0.17    0.16
 -17   9   1    0.01    0.22
 -16   9   1    0.10    0.21
 -16   9   1   -0.13    0.19
 -16   9   1   -0.02    0.15
 -15   9   1    0.25    0.22
 -15   9   1    0.56    0.23
 -15   9   1    0.69    0.20
 -14   9   1    1.33    0.26
 -14   9   1    1.54    0.24
 -14   9   1    1.25    0.26
 -13   9   1    1.16    0.25
 -13   9   1    1.36    0.22
 -13   9   1    1.04    0.24
  12  -9  -1   -0.01    0.15
 -12   9   1   -0.01    0.17
 -12   9   1    0.06    0.14
 -12   9   1    0.10    0.17
  11  -9  -1    0.07    0.14
 -11   9   1   -0.15    0.14
 -11   9   1    0.34    0.17
 -11   9   1    0.21    0.16
  10  -9  -1    4.22    0.29
 -10   9   1    4.27    0.31
 -10   9   1    3.88    0.30
 -10   9   1    4.13    0.34
   9  -9  -1    2.79    0.25
  -9   9   1    2.69    0.26
  -9   9   1    2.82    0.26
  -9   9   1    2.48    0.24
   8  -9  -1    0.54    0.07
   8  -9  -1    0.27    0.14
  -8   9   1    0.38    0.16
  -8   9   1    0.42    0.14
  -8   9   1    0.61    0.16
  -8   9   1    0.44    0.16
   7  -9  -1    1.28    0.12
   7  -9  -1    1.10    0.17
  -7   9   1    1.62    0.21
  -7   9   1    1.13    0.18
  -7   9   1    1.25    0.17
  -7   9   1    1.29    0.16
   6  -9  -1    2.28    0.15
   6  -9  -1    2.41    0.23
   6  -9  -1    2.41    0.22
  -6   9   1    2.57    0.23
  -6   9   1    2.47    0.18
  -6   9   1    2.28    0.20
  -6   9   1    2.37    0.22
   5  -9  -1    0.82    0.14
   5  -9  -1    0.73    0.16
   5  -9  -1    0.54    0.10
   5  -9  -1    0.63    0.15
  -5   9   1    0.59    0.15
  -5   9   1    0.67    0.11
  -5   9   1    0.53    0.11
  -5   9   1    0.76    0.17
   4  -9  -1   19.31    0.54
   4  -9  -1   20.13    0.51
   4  -9  -1   19.99    0.57
   4  -9  -1   19.55    0.49
  -4   9   1   19.74    0.43
  -4   9   1   20.92    0.57
  -4   9   1   19.77    0.56
  -4   9   1   20.19    0.49
   3  -9  -1    0.24    0.12
   3  -9  -1    0.16    0.08
   3  -9  -1    0.30    0.12
   3  -9  -1    0.34    0.11
  -3   9   1    0.27    0.06
  -3   9   1    0.30    0.08
  -3   9   1    0.35    0.13
  -3   9   1    0.39    0.09
  -3   9   1    0.14    0.13
   2  -9  -1    0.62    0.15
   2  -9  -1    0.56    0.09
   2  -9  -1    0.65    0.14
   2  -9  -1    0.79    0.14
  -2   9   1    0.69    0.15
  -2   9   1    0.77    0.09
  -2   9   1    0.68    0.05
  -2   9   1    0.76    0.15
  -2   9   1    0.71    0.09
   1  -9  -1    4.91    0.19
   1  -9  -1    5.47    0.27
   1  -9  -1    5.22    0.28
   1  -9  -1    5.04    0.29
  -1   9   1    5.16    0.17
  -1   9   1    5.10    0.27
  -1   9   1    5.16    0.27
  -1   9   1    5.60    0.18
   0  -9  -1    0.33    0.12
   0  -9  -1    0.27    0.13
   0  -9  -1    0.30    0.06
   0  -9  -1    0.24    0.11
   0   9   1    0.57    0.22
   0   9   1    0.28    0.06
   0   9   1    0.32    0.07
   0   9   1    0.30    0.11
  -1  -9  -1    0.60    0.17
  -1  -9  -1    0.54    0.07
  -1  -9  -1    0.56    0.12
  -1  -9  -1    0.45    0.06
  -1  -9  -1    0.62    0.13
   1   9   1    0.59    0.13
   1   9   1    0.66    0.07
  -2  -9  -1    3.11    0.10
  -2  -9  -1    2.94    0.13
  -2  -9  -1    3.00    0.09
  -2  -9  -1    2.63    0.21
  -2  -9  -1    3.10    0.22
   2   9   1    3.15    0.14
   2   9   1    3.44    0.22
  -3  -9  -1    1.01    0.14
  -3  -9  -1    1.01    0.07
  -3  -9  -1    1.10    0.10
  -3  -9  -1    0.88    0.10
  -3  -9  -1    1.01    0.14
   3   9   1    0.87    0.12
   3   9   1    1.01    0.10
  -4  -9  -1    0.00    0.08
  -4  -9  -1    0.08    0.07
  -4  -9  -1   -0.02    0.05
  -4  -9  -1   -0.05    0.07
  -4  -9  -1    0.01    0.05
  -4  -9  -1    0.09    0.09
   4   9   1    0.01    0.07
   4   9   1    0.09    0.09
  -5  -9  -1    0.13    0.09
  -5  -9  -1    0.21    0.09
  -5  -9  -1    0.10    0.06
  -5  -9  -1    0.10    0.09
  -5  -9  -1    0.08    0.08
   5   9   1    0.20    0.09
  -6  -9  -1    5.37    0.24
  -6  -9  -1    4.89    0.23
  -6  -9  -1    5.27    0.24
  -6  -9  -1    5.26    0.21
  -6  -9  -1    4.85    0.23
   6   9   1    5.00    0.21
  -7  -9  -1    7.42    0.30
  -7  -9  -1    6.57    0.29
  -7  -9  -1    6.80    0.26
  -7  -9  -1    6.90    0.26
  -7  -9  -1    6.62    0.26
   7   9   1    7.08    0.23
  -8  -9  -1    0.72    0.11
  -8  -9  -1    0.77    0.14
  -8  -9  -1    0.76    0.11
  -8  -9  -1    0.75    0.13
   8   9   1    0.96    0.09
  -9  -9  -1    1.43    0.18
  -9  -9  -1    1.06    0.15
  -9  -9  -1    1.44    0.12
  -9  -9  -1    1.51    0.12
 -10  -9  -1   25.67    0.66
 -10  -9  -1   26.55    0.70
 -10  -9  -1   26.14    0.52
 -11  -9  -1    0.13    0.15
 -11  -9  -1   -0.06    0.12
 -12  -9  -1    0.64    0.19
 -12  -9  -1    0.66    0.26
 -13  -9  -1    0.28    0.25
 -13  -9  -1   -0.05    0.17
 -14  -9  -1    0.68    0.29
 -14  -9  -1    0.39    0.21
 -16  10   1    0.26    0.22
 -16  10   1    0.32    0.26
 -16  10   1    0.40    0.18
 -15  10   1    0.21    0.17
 -15  10   1   -0.16    0.19
 -15  10   1   -0.13    0.19
 -14  10   1    0.29    0.18
 -14  10   1    0.06    0.19
 -14  10   1   -0.08    0.19
 -13  10   1    0.36    0.20
 -13  10   1    0.28    0.19
 -13  10   1    0.21    0.18
  12 -10  -1    0.55    0.17
 -12  10   1    0.55    0.20
 -12  10   1    0.36    0.18
 -12  10   1    0.63    0.19
  11 -10  -1    2.20    0.25
 -11  10   1    2.98    0.31
 -11  10   1    2.68    0.28
 -11  10   1    2.32    0.26
  10 -10  -1    5.40    0.34
 -10  10   1    4.86    0.35
 -10  10   1    4.68    0.33
 -10  10   1    5.13    0.35
   9 -10  -1    0.31    0.15
   9 -10  -1    0.31    0.06
  -9  10   1    0.27    0.15
  -9  10   1    0.45    0.17
  -9  10   1    0.37    0.17
   8 -10  -1    0.54    0.17
   8 -10  -1    0.52    0.08
  -8  10   1    0.38    0.15
  -8  10   1    0.61    0.17
  -8  10   1    0.46    0.16
   7 -10  -1    1.41    0.19
   7 -10  -1    1.42    0.14
  -7  10   1    1.39    0.20
  -7  10   1    1.23    0.17
  -7  10   1    1.34    0.16
  -7  10   1    1.63    0.21
   6 -10  -1   26.02    0.56
   6 -10  -1   25.94    0.68
  -6  10   1   26.08    0.60
  -6  10   1   25.77    0.64
  -6  10   1   25.80    0.70
  -6  10   1   25.94    0.70
   5 -10  -1   12.22    0.43
   5 -10  -1   11.78    0.40
   5 -10  -1   11.69    0.35
  -5  10   1   11.69    0.44
  -5  10   1   11.68    0.33
  -5  10   1   11.83    0.37
  -5  10   1   11.67    0.51
   4 -10  -1    5.26    0.25
   4 -10  -1    5.41    0.29
   4 -10  -1    4.78    0.25
   4 -10  -1    5.25    0.31
  -4  10   1    4.64    0.18
  -4  10   1    5.36    0.31
  -4  10   1    4.91    0.23
   3 -10  -1    1.02    0.12
   3 -10  -1    1.24    0.19
   3 -10  -1    0.87    0.15
   3 -10  -1    1.16    0.18
  -3  10   1    1.08    0.17
  -3  10   1    1.12    0.09
  -3  10   1    1.04    0.11
  -3  10   1    1.10    0.11
   2 -10  -1    0.40    0.09
   2 -10  -1    0.48    0.14
   2 -10  -1    0.55    0.14
   2 -10  -1    0.43    0.13
  -2  10   1    0.33    0.14
  -2  10   1    0.46    0.08
  -2  10   1    0.45    0.08
   1 -10  -1   15.37    0.47
   1 -10  -1   15.45    0.37
   1 -10  -1   14.82    0.50
   1 -10  -1   15.80    0.49
  -1  10   1   15.61    0.34
  -1  10   1   15.54    0.35
  -1  10   1   16.13    0.49
   0 -10  -1    0.08    0.06
   0 -10  -1    0.17    0.13
   0 -10  -1    0.11    0.12
   0 -10  -1    0.26    0.13
   0  10   1    0.17    0.12
   0  10   1    0.12    0.06
   0  10   1    0.13    0.06
  -1 -10  -1    1.77    0.11
  -1 -10  -1    1.71    0.10
  -1 -10  -1    1.60    0.17
  -1 -10  -1    1.42    0.23
  -1 -10  -1    1.56    0.19
   1  10   1    1.71    0.11
   1  10   1    1.56    0.17
  -2 -10  -1    0.10    0.16
  -2 -10  -1    0.23    0.06
  -2 -10  -1    0.20    0.11
  -2 -10  -1    0.32    0.05
  -2 -10  -1    0.09    0.11
   2  10   1    0.41    0.12
   2  10   1    0.24    0.06
  -3 -10  -1    0.17    0.11
  -3 -10  -1    0.12    0.04
  -3 -10  -1    0.18    0.07
  -3 -10  -1    0.11    0.05
  -3 -10  -1    0.22    0.11
   3  10   1    0.22    0.10
   3  10   1    0.20    0.07
  -4 -10  -1   10.21    0.23
  -4 -10  -1    9.85    0.34
  -4 -10  -1   10.11    0.25
  -4 -10  -1   10.23    0.36
  -4 -10  -1   10.10    0.27
  -4 -10  -1    9.82    0.28
   4  10   1    9.89    0.34
   4  10   1    9.95    0.30
  -5 -10  -1    3.50    0.19
  -5 -10  -1    3.40    0.22
  -5 -10  -1    3.73    0.19
  -5 -10  -1    3.69    0.22
  -5 -10  -1    3.71    0.16
  -5 -10  -1    3.85    0.14
   5  10   1    3.70    0.20
  -6 -10  -1    3.08    0.21
  -6 -10  -1    3.69    0.15
  -6 -10  -1    3.56    0.22
  -6 -10  -1    3.47    0.21
  -6 -10  -1    3.45    0.21
  -6 -10  -1    3.66    0.18
   6  10   1    3.58    0.20
  -7 -10  -1    2.30    0.19
  -7 -10  -1    2.25    0.18
  -7 -10  -1    2.04    0.18
  -7 -10  -1    2.22    0.21
  -7 -10  -1    2.38    0.21
   7  10   1    2.08    0.16
  -8 -10  -1    3.95    0.25
  -8 -10  -1    3.81    0.21
  -8 -10  -1    4.24    0.22
  -8 -10  -1    3.95    0.21
  -9 -10  -1    4.48    0.25
  -9 -10  -1    4.85    0.30
  -9 -10  -1    4.86    0.21
 -10 -10  -1   -0.12    0.13
 -10 -10  -1    0.03    0.07
 -10 -10  -1    0.04    0.19
 -11 -10  -1    3.43    0.13
 -11 -10  -1    3.80    0.45
 -11 -10  -1    3.39    0.29
 -12 -10  -1    1.91    0.34
 -12 -10  -1    1.74    0.24
 -13 -10  -1    0.09    0.18
 -13 -10  -1    0.23    0.26
 -16  11   1    0.78    0.28
 -16  11   1    0.57    0.21
 -16  11   1    0.60    0.26
 -15  11   1    0.64    0.24
 -15  11   1    0.81    0.22
 -15  11   1    0.66    0.24
 -14  11   1    0.18    0.22
 -14  11   1    0.21    0.20
 -14  11   1    0.28    0.21
 -13  11   1    0.92    0.24
 -13  11   1    1.02    0.22
 -13  11   1    1.18    0.27
  12 -11  -1    1.95    0.25
 -12  11   1    1.58    0.24
 -12  11   1    1.55    0.25
 -12  11   1    1.34    0.24
  11 -11  -1    0.52    0.19
 -11  11   1    0.56    0.20
 -11  11   1    0.41    0.18
  10 -11  -1    5.97    0.36
 -10  11   1    6.37    0.40
 -10  11   1    5.77    0.36
   9 -11  -1    0.16    0.06
   9 -11  -1    0.03    0.15
  -9  11   1   -0.19    0.12
  -9  11   1    0.17    0.16
   8 -11  -1    0.15    0.09
   8 -11  -1    0.00    0.15
  -8  11   1    0.28    0.14
  -8  11   1    0.45    0.18
   7 -11  -1    1.70    0.23
   7 -11  -1    1.64    0.16
  -7  11   1    1.69    0.23
  -7  11   1    1.78    0.18
  -7  11   1    1.67    0.20
   6 -11  -1    0.11    0.15
   6 -11  -1    0.24    0.10
  -6  11   1    0.12    0.15
  -6  11   1    0.19    0.12
  -6  11   1    0.18    0.10
   5 -11  -1    7.56    0.30
   5 -11  -1    7.70    0.37
   5 -11  -1    7.31    0.33
  -5  11   1    7.06    0.25
  -5  11   1    6.54    0.36
  -5  11   1    7.23    0.30
   4 -11  -1    3.60    0.23
   4 -11  -1    3.50    0.23
   4 -11  -1    3.72    0.29
  -4  11   1    3.81    0.16
  -4  11   1    3.72    0.21
  -4  11   1    3.47    0.19
  -4  11   1    2.65    0.25
   3 -11  -1    0.79    0.12
   3 -11  -1    0.75    0.16
   3 -11  -1    1.14    0.19
   3 -11  -1    0.62    0.15
  -3  11   1    1.45    0.21
  -3  11   1    0.85    0.08
  -3  11   1    0.83    0.11
  -3  11   1    0.99    0.11
   2 -11  -1    4.44    0.30
   2 -11  -1    4.95    0.29
   2 -11  -1    4.74    0.30
   2 -11  -1    4.52    0.21
  -2  11   1    4.33    0.30
  -2  11   1    5.28    0.21
  -2  11   1    5.26    0.18
   1 -11  -1    0.59    0.15
   1 -11  -1    0.50    0.15
   1 -11  -1    0.59    0.16
   1 -11  -1    0.53    0.09
  -1  11   1    0.53    0.15
  -1  11   1    0.46    0.09
  -1  11   1    0.48    0.08
   0 -11  -1   13.11    0.32
   0 -11  -1   13.21    0.46
   0 -11  -1   13.15    0.44
   0 -11  -1   13.15    0.51
   0  11   1   13.10    0.30
   0  11   1   13.56    0.45
   0  11   1   12.64    0.29
  -1 -11  -1    4.43    0.28
  -1 -11  -1    3.94    0.26
  -1 -11  -1    3.62    0.31
  -1 -11  -1    3.87    0.15
   1  11   1    4.11    0.27
   1  11   1    3.92    0.15
  -2 -11  -1   11.83    0.51
  -2 -11  -1   12.48    0.27
  -2 -11  -1   12.68    0.30
  -2 -11  -1   12.33    0.42
  -2 -11  -1   13.09    0.44
   2  11   1   12.41    0.30
   2  11   1   12.51    0.42
  -3 -11  -1    0.29    0.07
  -3 -11  -1    0.45    0.13
  -3 -11  -1    0.26    0.05
  -3 -11  -1    0.30    0.12
  -3 -11  -1    0.15    0.16
  -3 -11  -1    0.13    0.04
   3  11   1    0.14    0.07
   3  11   1    0.36    0.12
  -4 -11  -1   12.97    0.26
  -4 -11  -1   12.65    0.33
  -4 -11  -1   11.94    0.56
  -4 -11  -1   13.32    0.43
  -4 -11  -1   12.16    0.41
  -4 -11  -1   12.79    0.28
  -4 -11  -1   12.70    0.30
   4  11   1   12.78    0.34
   4  11   1   12.81    0.41
  -5 -11  -1    7.64    0.20
  -5 -11  -1    7.52    0.33
  -5 -11  -1    7.26    0.48
  -5 -11  -1    7.63    0.27
  -5 -11  -1    8.08    0.26
  -5 -11  -1    7.84    0.22
  -5 -11  -1    7.51    0.32
   5  11   1    7.86    0.30
  -6 -11  -1    0.19    0.11
  -6 -11  -1    0.23    0.08
  -6 -11  -1    0.13    0.07
  -6 -11  -1    0.21    0.11
  -6 -11  -1    0.24    0.11
  -6 -11  -1   -0.02    0.20
  -6 -11  -1    0.19    0.12
   6  11   1    0.08    0.10
  -7 -11  -1    0.00    0.11
  -7 -11  -1    0.09    0.11
  -7 -11  -1   -0.06    0.21
  -7 -11  -1    0.08    0.10
  -7 -11  -1    0.24    0.09
  -8 -11  -1    2.42    0.22
  -8 -11  -1    2.71    0.20
  -8 -11  -1    2.64    0.19
  -8 -11  -1    1.89    0.33
  -9 -11  -1   24.05    0.55
  -9 -11  -1   24.81    0.94
  -9 -11  -1   24.67    0.64
 -10 -11  -1    0.19    0.22
 -10 -11  -1    0.23    0.08
 -10 -11  -1    0.00    0.14
 -11 -11  -1    1.61    0.12
 -11 -11  -1    1.19    0.20
 -11 -11  -1    1.43    0.34
 -12 -11  -1   -0.04    0.24
 -12 -11  -1   -0.24    0.16
 -16  12   1    0.82    0.27
 -16  12   1    0.86    0.27
 -16  12   1    0.96    0.24
 -15  12   1   -0.09    0.21
 -15  12   1   -0.36    0.19
 -15  12   1    0.12    0.19
 -14  12   1   -0.20    0.18
 -14  12   1    0.02    0.18
 -14  12   1    0.12    0.20
 -13  12   1   -0.17    0.17
 -13  12   1    0.12    0.19
 -13  12   1    0.02    0.18
  12 -12  -1   -0.14    0.16
 -12  12   1    0.05    0.17
 -12  12   1    0.11    0.20
 -12  12   1    0.12    0.17
  11 -12  -1    0.39    0.18
 -11  12   1    0.31    0.18
 -11  12   1    0.27    0.18
 -11  12   1    0.13    0.18
  10 -12  -1    0.67    0.20
 -10  12   1    0.84    0.20
 -10  12   1    0.50    0.20
   9 -12  -1    1.02    0.22
   9 -12  -1    0.97    0.10
  -9  12   1    0.86    0.18
  -9  12   1    0.87    0.23
   8 -12  -1   -0.06    0.10
   8 -12  -1    0.24    0.17
  -8  12   1    0.00    0.13
  -8  12   1    0.26    0.18
   7 -12  -1    4.39    0.23
   7 -12  -1    4.63    0.33
  -7  12   1    4.67    0.24
  -7  12   1    4.53    0.35
  -7  12   1    4.55    0.30
   6 -12  -1    2.14    0.20
   6 -12  -1    2.34    0.25
  -6  12   1    2.14    0.20
  -6  12   1    2.29    0.27
  -6  12   1    2.40    0.18
   5 -12  -1    0.01    0.11
   5 -12  -1   -0.07    0.15
   5 -12  -1   -0.20    0.11
  -5  12   1    0.09    0.16
  -5  12   1   -0.01    0.08
  -5  12   1   -0.06    0.10
   4 -12  -1    1.36    0.16
   4 -12  -1    1.18    0.18
   4 -12  -1    1.70    0.23
  -4  12   1    1.48    0.15
  -4  12   1    1.59    0.15
  -4  12   1    1.77    0.12
  -4  12   1    1.62    0.23
   3 -12  -1    2.13    0.19
   3 -12  -1    1.90    0.27
   3 -12  -1    2.25    0.24
   3 -12  -1    2.04    0.24
  -3  12   1    2.40    0.15
  -3  12   1    1.94    0.18
  -3  12   1    1.90    0.23
  -3  12   1    2.17    0.08
   2 -12  -1   10.00    0.32
   2 -12  -1    9.59    0.43
   2 -12  -1   10.90    0.44
   2 -12  -1   10.53    0.42
  -2  12   1   10.15    0.43
  -2  12   1   10.15    0.27
  -2  12   1    9.76    0.29
   1 -12  -1    2.42    0.24
   1 -12  -1    2.09    0.24
   1 -12  -1    2.53    0.16
   1 -12  -1    2.26    0.24
  -1  12   1    3.14    0.27
  -1  12   1    2.22    0.14
  -1  12   1    2.16    0.16
   0 -12  -1    0.09    0.13
   0 -12  -1    0.06    0.06
   0 -12  -1    0.18    0.13
   0 -12  -1    0.05    0.15
   0  12   1   -0.01    0.06
   0  12   1    0.00    0.12
   0  12   1   -0.03    0.05
  -1 -12  -1    0.01    0.05
  -1 -12  -1    0.06    0.13
  -1 -12  -1    0.01    0.16
  -1 -12  -1   -0.11    0.11
   1  12   1    0.00    0.12
   1  12   1    0.01    0.05
  -2 -12  -1   -0.01    0.17
  -2 -12  -1    0.17    0.06
  -2 -12  -1    0.20    0.13
  -2 -12  -1   -0.04    0.11
  -2 -12  -1    0.15    0.05
   2  12   1    0.13    0.12
   2  12   1    0.13    0.06
  -3 -12  -1    0.97    0.17
  -3 -12  -1    1.08    0.18
  -3 -12  -1    1.00    0.08
  -3 -12  -1    1.03    0.10
  -3 -12  -1    0.97    0.23
   3  12   1    1.06    0.11
   3  12   1    1.08    0.17
  -4 -12  -1    0.75    0.10
  -4 -12  -1    0.57    0.06
  -4 -12  -1    0.75    0.08
  -4 -12  -1    0.63    0.05
  -4 -12  -1    0.53    0.22
  -4 -12  -1    0.67    0.16
  -4 -12  -1    0.59    0.15
   4  12   1    0.73    0.11
   4  12   1    0.63    0.15
  -5 -12  -1    3.62    0.14
  -5 -12  -1    3.16    0.25
  -5 -12  -1    4.11    0.40
  -5 -12  -1    3.58    0.17
  -5 -12  -1    3.44    0.20
  -5 -12  -1    3.26    0.12
  -5 -12  -1    3.56    0.26
   5  12   1    3.41    0.24
  -6 -12  -1   -0.02    0.11
  -6 -12  -1   -0.02    0.06
  -6 -12  -1    0.05    0.11
  -6 -12  -1   -0.11    0.22
  -7 -12  -1    1.53    0.17
  -7 -12  -1    1.55    0.33
  -7 -12  -1    1.31    0.17
  -8 -12  -1    0.59    0.25
  -8 -12  -1    0.74    0.14
  -8 -12  -1    0.38    0.15
  -9 -12  -1    3.10    0.21
  -9 -12  -1    2.87    0.25
  -9 -12  -1    3.23    0.43
 -10 -12  -1    0.47    0.21
 -10 -12  -1    0.80    0.31
 -10 -12  -1    0.59    0.11
 -11 -12  -1    2.27    0.40
 -11 -12  -1    1.73    0.13
 -12 -12  -1   -0.09    0.27
 -15  13   1    0.27    0.22
 -15  13   1    0.43    0.22
 -15  13   1    0.61    0.26
 -14  13   1   -0.12    0.21
 -14  13   1   -0.06    0.19
 -14  13   1    0.05    0.20
 -13  13   1   -0.07    0.19
 -13  13   1    0.12    0.19
 -13  13   1    0.23    0.21
  12 -13  -1    0.28    0.19
 -12  13   1   -0.02    0.19
 -12  13   1    0.33    0.19
 -12  13   1    0.04    0.17
  11 -13  -1    1.52    0.25
 -11  13   1    1.36    0.25
 -11  13   1    1.62    0.27
 -11  13   1    1.25    0.23
  10 -13  -1    1.95    0.26
 -10  13   1    2.00    0.30
 -10  13   1    1.71    0.24
   9 -13  -1    0.09    0.18
   9 -13  -1    0.06    0.09
  -9  13   1   -0.10    0.13
  -9  13   1   -0.21    0.17
   8 -13  -1    2.34    0.28
   8 -13  -1    2.23    0.21
  -8  13   1    2.53    0.30
  -8  13   1    2.24    0.23
   7 -13  -1    4.49    0.37
   7 -13  -1    4.32    0.25
  -7  13   1    4.72    0.31
  -7  13   1    4.58    0.25
  -7  13   1    4.79    0.38
   6 -13  -1    0.51    0.18
   6 -13  -1    0.18    0.12
  -6  13   1    0.30    0.18
  -6  13   1    0.11    0.12
  -6  13   1    0.28    0.11
   5 -13  -1   27.20    0.69
   5 -13  -1   26.61    0.75
  -5  13   1   27.42    0.78
  -5  13   1   26.50    0.61
  -5  13   1   27.48    0.65
  -5  13   1   26.34    0.55
   4 -13  -1    3.20    0.27
   4 -13  -1    3.37    0.30
   4 -13  -1    3.51    0.25
  -4  13   1    2.97    0.18
  -4  13   1    2.84    0.28
  -4  13   1    3.32    0.22
  -4  13   1    3.15    0.13
   3 -13  -1    8.86    0.41
   3 -13  -1    9.10    0.34
   3 -13  -1   10.06    0.44
  -3  13   1    9.67    0.43
  -3  13   1    9.50    0.32
  -3  13   1    9.77    0.28
   2 -13  -1    5.55    0.35
   2 -13  -1    6.19    0.36
   2 -13  -1    5.63    0.34
   2 -13  -1    6.15    0.26
  -2  13   1    6.09    0.36
  -2  13   1    5.59    0.20
  -2  13   1    5.74    0.24
   1 -13  -1    0.28    0.15
   1 -13  -1    0.17    0.15
   1 -13  -1    0.15    0.15
   1 -13  -1    0.02    0.08
  -1  13   1    0.24    0.16
  -1  13   1    0.08    0.08
  -1  13   1    0.00    0.08
   0 -13  -1    3.02    0.30
   0 -13  -1    2.94    0.26
   0 -13  -1    2.74    0.26
   0 -13  -1    2.81    0.16
   0  13   1    2.79    0.13
   0  13   1    3.34    0.29
  -1 -13  -1   13.59    0.49
  -1 -13  -1   14.17    0.51
  -1 -13  -1   13.66    0.32
  -1 -13  -1   13.43    0.57
   1  13   1   13.66    0.31
   1  13   1   15.04    0.50
  -2 -13  -1    0.26    0.18
  -2 -13  -1    0.07    0.14
  -2 -13  -1   -0.05    0.12
  -2 -13  -1    0.05    0.05
   2  13   1    0.11    0.14
   2  13   1    0.11    0.07
  -3 -13  -1    2.83    0.27
  -3 -13  -1    2.49    0.25
  -3 -13  -1    2.34    0.33
  -3 -13  -1    2.37    0.10
  -3 -13  -1    2.48    0.15
   3  13   1    2.82    0.15
   3  13   1    2.74    0.25
  -4 -13  -1    1.08    0.11
  -4 -13  -1    0.74    0.17
  -4 -13  -1    1.01    0.28
   4  13   1    1.03    0.17
  -5 -13  -1    1.36    0.14
  -5 -13  -1    0.97    0.27
  -5 -13  -1    1.11    0.18
  -6 -13  -1    0.11    0.11
  -6 -13  -1    0.07    0.12
  -6 -13  -1    0.04    0.21
  -7 -13  -1    0.20    0.12
  -7 -13  -1   -0.09    0.21
  -7 -13  -1   -0.10    0.12
  -8 -13  -1   -0.02    0.10
  -8 -13  -1   -0.14    0.21
  -9 -13  -1    1.89    0.38
  -9 -13  -1    1.79    0.17
 -10 -13  -1    0.13    0.10
 -10 -13  -1    0.10    0.27
 -11 -13  -1    0.19    0.09
 -11 -13  -1    0.26    0.24
 -15  14   1    0.08    0.23
 -15  14   1    0.17    0.24
 -15  14   1    0.15    0.22
 -14  14   1    2.51    0.33
 -14  14   1    1.61    0.30
 -14  14   1    1.64    0.30
 -13  14   1   -0.01    0.20
 -13  14   1    0.06    0.20
 -13  14   1    0.25    0.19
  12 -14  -1    1.11    0.24
 -12  14   1    1.19    0.26
 -12  14   1    1.19    0.26
 -12  14   1    1.06    0.25
  11 -14  -1    0.88    0.22
 -11  14   1    0.76    0.25
 -11  14   1    0.79    0.23
 -11  14   1    0.74    0.22
  10 -14  -1    1.68    0.26
 -10  14   1    1.84    0.29
 -10  14   1    1.58    0.25
   9 -14  -1    8.93    0.49
   9 -14  -1    8.62    0.42
  -9  14   1    8.89    0.44
  -9  14   1    8.47    0.48
   8 -14  -1    1.76    0.19
   8 -14  -1    2.19    0.28
  -8  14   1    2.03    0.29
  -8  14   1    1.97    0.24
   7 -14  -1    0.68    0.16
   7 -14  -1    1.08    0.24
  -7  14   1    0.92    0.15
  -7  14   1    0.98    0.23
  -7  14   1    0.66    0.17
   6 -14  -1   -0.24    0.16
   6 -14  -1   -0.03    0.12
  -6  14   1    0.13    0.09
  -6  14   1    0.04    0.19
  -6  14   1    0.06    0.13
   5 -14  -1    1.19    0.23
   5 -14  -1    0.98    0.18
  -5  14   1    1.41    0.12
  -5  14   1    1.19    0.16
  -5  14   1    1.07    0.24
  -5  14   1    1.26    0.14
   4 -14  -1    1.27    0.21
   4 -14  -1    1.18    0.16
   4 -14  -1    1.51    0.24
  -4  14   1    1.21    0.08
  -4  14   1    1.03    0.15
  -4  14   1    1.86    0.26
  -4  14   1    1.32    0.13
   3 -14  -1    0.03    0.10
   3 -14  -1   -0.03    0.15
   3 -14  -1    0.03    0.17
  -3  14   1    0.07    0.17
  -3  14   1    0.11    0.11
  -3  14   1    0.19    0.09
   2 -14  -1    3.32    0.31
   2 -14  -1    2.51    0.20
   2 -14  -1    3.14    0.32
  -2  14   1    2.89    0.17
  -2  14   1    3.00    0.21
  -2  14   1    3.01    0.29
   1 -14  -1    6.05    0.38
   1 -14  -1    5.91    0.25
   1 -14  -1    5.62    0.37
   1 -14  -1    5.58    0.37
  -1  14   1    5.67    0.19
  -1  14   1    5.84    0.37
  -1  14   1    5.74    0.23
   0 -14  -1    1.62    0.24
   0 -14  -1    1.62    0.15
   0 -14  -1    1.90    0.24
   0 -14  -1    1.41    0.25
   0  14   1    1.43    0.11
   0  14   1    2.14    0.25
  -1 -14  -1   13.85    0.50
  -1 -14  -1   14.15    0.53
  -1 -14  -1   12.76    0.58
  -1 -14  -1   12.64    0.31
   1  14   1   13.19    0.50
   1  14   1   12.36    0.29
  -2 -14  -1   13.10    0.61
  -2 -14  -1   14.10    0.50
  -2 -14  -1   12.61    0.51
  -2 -14  -1   12.76    0.31
   2  14   1   13.59    0.50
  -3 -14  -1    1.09    0.26
  -3 -14  -1    0.76    0.18
   3  14   1    0.99    0.18
  -4 -14  -1    0.99    0.10
  -4 -14  -1    0.87    0.26
  -4 -14  -1    0.78    0.18
  -5 -14  -1    2.14    0.34
  -5 -14  -1    2.09    0.22
  -6 -14  -1   -0.06    0.20
  -6 -14  -1    0.18    0.14
  -7 -14  -1    0.68    0.27
  -7 -14  -1    0.68    0.15
  -8 -14  -1    0.19    0.12
  -8 -14  -1    0.11    0.23
  -9 -14  -1   -0.01    0.22
  -9 -14  -1    0.14    0.11
 -10 -14  -1    1.10    0.34
 -10 -14  -1    1.37    0.15
 -14  15   1    2.12    0.33
 -14  15   1    1.70    0.29
 -14  15   1    1.55    0.31
 -13  15   1   -0.21    0.19
 -13  15   1    0.22    0.22
 -13  15   1    0.22    0.20
  12 -15  -1    0.59    0.22
 -12  15   1    1.11    0.27
 -12  15   1    0.55    0.23
 -12  15   1    0.58    0.23
  11 -15  -1    0.31    0.21
 -11  15   1    0.11    0.20
 -11  15   1    0.20    0.19
 -11  15   1    0.46    0.22
  10 -15  -1    0.21    0.21
 -10  15   1    0.10    0.22
 -10  15   1    0.20    0.18
 -10  15   1   -0.02    0.16
   9 -15  -1    0.75    0.23
  -9  15   1    0.26    0.21
  -9  15   1    0.26    0.17
   8 -15  -1    0.67    0.23
   8 -15  -1    0.24    0.15
  -8  15   1    0.64    0.25
  -8  15   1    0.30    0.17
   7 -15  -1    0.85    0.18
   7 -15  -1    0.98    0.24
  -7  15   1    1.09    0.19
  -7  15   1    1.09    0.25
   6 -15  -1    3.03    0.27
   6 -15  -1    3.38    0.34
  -6  15   1    3.53    0.28
  -6  15   1    3.07    0.35
   5 -15  -1    5.23    0.40
   5 -15  -1    5.16    0.34
  -5  15   1    5.35    0.29
  -5  15   1    5.30    0.42
   4 -15  -1    1.48    0.24
   4 -15  -1    1.87    0.27
  -4  15   1    1.51    0.26
  -4  15   1    1.71    0.18
   3 -15  -1   -0.13    0.16
   3 -15  -1   -0.11    0.17
   3 -15  -1    0.02    0.11
  -3  15   1    0.03    0.19
  -3  15   1   -0.16    0.11
   2 -15  -1    9.55    0.35
   2 -15  -1   10.25    0.48
   2 -15  -1    9.88    0.49
  -2  15   1    9.66    0.33
  -2  15   1   10.57    0.48
   1 -15  -1    0.08    0.18
   1 -15  -1    0.10    0.18
   1 -15  -1    0.31    0.15
  -1  15   1    0.11    0.18
  -1  15   1    0.18    0.10
   0 -15  -1    4.52    0.37
   0 -15  -1    3.80    0.39
   0 -15  -1    4.15    0.35
   0  15   1    3.85    0.34
  -1 -15  -1    1.99    0.25
  -1 -15  -1    1.72    0.29
   1  15   1    2.38    0.27
  -2 -15  -1   13.64    0.66
  -2 -15  -1   13.86    0.53
   2  15   1   14.60    0.53
  -3 -15  -1    1.27    0.29
  -3 -15  -1    1.46    0.23
  -4 -15  -1   -0.06    0.21
  -4 -15  -1    0.18    0.15
  -5 -15  -1    0.26    0.26
  -5 -15  -1    0.31    0.16
  -6 -15  -1    0.18    0.24
  -6 -15  -1    0.27    0.15
  -7 -15  -1    0.16    0.13
  -7 -15  -1    0.36    0.26
  -8 -15  -1    0.25    0.13
  -8 -15  -1    0.14    0.24
  -9 -15  -1    0.18    0.12
  -9 -15  -1    0.04    0.25
 -13  16   1    0.67    0.24
 -13  16   1    0.89    0.25
 -13  16   1    0.96    0.29
  12 -16  -1   -0.14    0.25
 -12  16   1   -0.31    0.19
 -12  16   1   -0.12    0.18
 -12  16   1   -0.06    0.21
  11 -16  -1    0.47    0.24
 -11  16   1    0.06    0.18
 -11  16   1    0.57    0.20
 -11  16   1    0.16    0.23
  10 -16  -1    1.92    0.29
 -10  16   1    1.11    0.24
 -10  16   1    2.04    0.33
 -10  16   1    1.13    0.22
   9 -16  -1    0.36    0.22
  -9  16   1   -0.09    0.22
  -9  16   1    0.18    0.18
   8 -16  -1    0.30    0.22
  -8  16   1    0.21    0.22
  -8  16   1    0.12    0.17
   7 -16  -1    0.47    0.22
   7 -16  -1    0.17    0.16
  -7  16   1    0.61    0.24
  -7  16   1    0.35    0.16
   6 -16  -1    0.14    0.21
   6 -16  -1    0.13    0.16
  -6  16   1    0.12    0.21
  -6  16   1   -0.06    0.13
   5 -16  -1    0.22    0.20
   5 -16  -1    0.31    0.18
  -5  16   1    0.30    0.15
  -5  16   1    0.19    0.21
   4 -16  -1    6.38    0.43
   4 -16  -1    5.34    0.38
  -4  16   1    6.44    0.42
  -4  16   1    5.00    0.29
   3 -16  -1   24.89    0.76
   3 -16  -1   23.82    0.76
  -3  16   1   23.44    0.59
  -3  16   1   24.09    0.77
   2 -16  -1    0.24    0.21
   2 -16  -1    0.29    0.19
  -2  16   1    0.22    0.19
  -2  16   1    0.35    0.12
   1 -16  -1    0.74    0.22
   1 -16  -1    0.76    0.22
  -1  16   1    0.95    0.12
  -1  16   1    0.75    0.22
   0 -16  -1    1.41    0.29
   0 -16  -1    1.19    0.24
   0  16   1    1.48    0.24
  -1 -16  -1    3.51    0.33
  -1 -16  -1    2.99    0.36
   1  16   1    3.68    0.34
  -2 -16  -1    0.63    0.20
  -2 -16  -1    0.63    0.27
  -3 -16  -1    0.76    0.27
  -3 -16  -1    0.54    0.18
  -4 -16  -1    2.41    0.37
  -4 -16  -1    1.81    0.24
  -5 -16  -1    0.70    0.17
  -5 -16  -1    1.10    0.30
  -6 -16  -1    1.40    0.32
  -6 -16  -1    0.92    0.18
  -7 -16  -1    0.29    0.24
  -7 -16  -1    0.12    0.13
  -8 -16  -1    0.25    0.28
  -8 -16  -1    0.06    0.13
 -12  17   1    0.46    0.22
 -12  17   1   -0.23    0.18
 -12  17   1    0.44    0.27
  11 -17  -1    0.13    0.21
 -11  17   1   -0.17    0.17
 -11  17   1    0.10    0.23
 -11  17   1    0.08    0.18
  10 -17  -1    0.54    0.24
 -10  17   1    0.54    0.20
 -10  17   1    1.28    0.30
 -10  17   1    1.03    0.22
   9 -17  -1    2.81    0.36
  -9  17   1    2.82    0.29
  -9  17   1    3.26    0.38
  -9  17   1    2.70    0.27
   8 -17  -1    0.64    0.24
  -8  17   1    0.38    0.19
  -8  17   1    0.35    0.16
  -8  17   1    0.37    0.23
   7 -17  -1    0.20    0.23
   7 -17  -1   -0.13    0.15
  -7  17   1   -0.18    0.15
  -7  17   1    0.02    0.21
   6 -17  -1    3.92    0.33
   6 -17  -1    4.57    0.41
  -6  17   1    5.13    0.46
  -6  17   1    4.66    0.33
   5 -17  -1    0.56    0.23
   5 -17  -1    0.29    0.19
  -5  17   1   -0.03    0.15
  -5  17   1    0.02    0.21
   4 -17  -1    4.04    0.37
   4 -17  -1    3.83    0.36
  -4  17   1    3.65    0.28
  -4  17   1    4.62    0.41
   3 -17  -1    0.87    0.23
   3 -17  -1    0.97    0.25
  -3  17   1    0.48    0.15
  -3  17   1    1.09    0.24
   2 -17  -1    2.14    0.31
   2 -17  -1    2.56    0.30
  -2  17   1    2.42    0.31
   1 -17  -1    1.20    0.24
   1 -17  -1    1.04    0.25
  -1  17   1    1.22    0.25
   0 -17  -1   -0.02    0.17
   0 -17  -1   -0.19    0.22
   0  17   1    0.07    0.17
  -1 -17  -1    0.93    0.22
  -1 -17  -1    0.39    0.25
  -2 -17  -1    2.90    0.30
  -2 -17  -1    3.14    0.41
  -3 -17  -1    2.18    0.37
  -3 -17  -1    2.03    0.27
  -4 -17  -1    0.11    0.16
  -4 -17  -1    0.42    0.27
  -5 -17  -1    0.51    0.18
  -5 -17  -1    0.10    0.24
  -6 -17  -1    0.01    0.14
  -6 -17  -1   -0.11    0.26
  -7 -17  -1   -0.02    0.26
  -7 -17  -1    0.11    0.14
  11 -18  -1    0.29    0.24
 -11  18   1    1.26    0.30
 -11  18   1    0.06    0.22
  10 -18  -1    0.33    0.24
 -10  18   1    0.43    0.26
 -10  18   1   -0.25    0.19
   9 -18  -1   -0.10    0.20
  -9  18   1    0.41    0.25
  -9  18   1    0.19    0.19
   8 -18  -1    0.20    0.21
  -8  18   1   -0.03    0.18
  -8  18   1    0.41    0.25
   7 -18  -1   -0.02    0.22
  -7  18   1   -0.33    0.16
  -7  18   1    0.25    0.23
   6 -18  -1   -0.24    0.17
   6 -18  -1   -0.10    0.20
  -6  18   1    0.39    0.23
  -6  18   1   -0.07    0.15
   5 -18  -1    1.63    0.30
   5 -18  -1    1.00    0.24
  -5  18   1    1.41    0.28
  -5  18   1    1.09    0.19
   4 -18  -1    1.33    0.25
   4 -18  -1    1.17    0.28
  -4  18   1    1.20    0.28
   3 -18  -1    1.16    0.28
   3 -18  -1    1.27    0.27
  -3  18   1    0.74    0.25
   2 -18  -1    3.11    0.35
   2 -18  -1    3.31    0.36
  -2  18   1    3.71    0.37
   1 -18  -1    0.15    0.20
   1 -18  -1    0.04    0.19
   0 -18  -1    0.50    0.26
   0 -18  -1    0.58    0.21
  -1 -18  -1    0.40    0.19
  -1 -18  -1    0.24    0.24
  -2 -18  -1    0.03    0.17
  -2 -18  -1   -0.45    0.17
  -3 -18  -1    0.67    0.30
  -3 -18  -1    0.91    0.22
  -4 -18  -1    0.16    0.27
  -4 -18  -1    0.11    0.17
  -5 -18  -1   -0.15    0.15
  -5 -18  -1   -0.21    0.22
  -6 -18  -1    0.07    0.29
  -6 -18  -1    0.30    0.17
  10 -19  -1    0.37    0.26
 -10  19   1   -0.23    0.25
 -10  19   1   -0.02    0.20
   9 -19  -1    1.47    0.31
  -9  19   1    1.21    0.30
  -9  19   1    1.29    0.25
   8 -19  -1    0.95    0.28
  -8  19   1    1.11    0.31
  -8  19   1    0.50    0.21
   7 -19  -1    1.32    0.28
  -7  19   1    1.58    0.33
   6 -19  -1    0.39    0.24
  -6  19   1    0.50    0.26
   5 -19  -1    0.92    0.24
   5 -19  -1    1.37    0.28
  -5  19   1    1.78    0.31
   4 -19  -1    3.37    0.37
   4 -19  -1    3.09    0.36
  -4  19   1    3.49    0.36
   3 -19  -1    1.77    0.29
   3 -19  -1    1.52    0.30
  -3  19   1    1.87    0.31
   2 -19  -1    1.07    0.27
   2 -19  -1    0.80    0.26
   1 -19  -1   -0.20    0.19
   1 -19  -1    0.19    0.20
   0 -19  -1    0.38    0.27
   0 -19  -1    0.25    0.21
  -1 -19  -1    0.12    0.25
  -1 -19  -1   -0.05    0.17
  -2 -19  -1   -0.11    0.21
  -2 -19  -1    0.12    0.19
  -3 -19  -1    0.39    0.20
  -3 -19  -1    0.12    0.27
  -4 -19  -1    0.36    0.26
  -4 -19  -1    0.24    0.18
   8 -20  -1    0.33    0.24
  -8  20   1    0.37    0.24
   7 -20  -1    0.55    0.25
  -7  20   1    0.08    0.24
   6 -20  -1    0.13    0.23
  -6  20   1   -0.14    0.22
   5 -20  -1   -0.26    0.18
   5 -20  -1    0.15    0.23
  -5  20   1    0.12    0.26
   4 -20  -1    1.42    0.30
   4 -20  -1    2.11    0.34
  -4  20   1    1.81    0.35
   3 -20  -1    2.60    0.34
   3 -20  -1    2.47    0.34
   2 -20  -1   -0.28    0.22
   2 -20  -1   -0.04    0.22
   1 -20  -1   -0.08    0.20
   1 -20  -1   -0.03    0.19
   0 -20  -1    0.16    0.20
   0 -20  -1   -0.42    0.22
  -1 -20  -1    0.29    0.29
  -1 -20  -1    0.41    0.21
  -2 -20  -1    0.97    0.31
  -2 -20  -1    0.94    0.26
  -2 -21   2    0.03    0.18
  -2 -21   2   -0.36    0.21
  -1 -21   2   -0.04    0.27
  -1 -21   2   -0.10    0.18
   0 -21   2    0.31    0.26
   0 -21   2    0.95    0.25
   1 -21   2   -0.01    0.24
   1 -21   2    0.27    0.22
   2 -21   2    1.46    0.31
   2 -21   2    2.56    0.33
   3 -21   2    0.79    0.27
   3 -21   2    1.26    0.28
  -4  21  -2    0.15    0.23
   4 -21   2   -0.10    0.19
   4 -21   2   -0.48    0.21
  -5  21  -2    0.58    0.27
   5 -21   2    0.02    0.22
  -6  21  -2    0.12    0.24
   6 -21   2   -0.25    0.20
  -5 -20   2    0.05    0.16
  -5 -20   2   -0.05    0.25
  -4 -20   2    0.11    0.27
  -4 -20   2    0.33    0.18
  -3 -20   2    0.11    0.24
  -3 -20   2    0.09    0.18
  -2 -20   2    0.39    0.20
  -2 -20   2   -0.04    0.26
  -1 -20   2   -0.16    0.21
  -1 -20   2   -0.07    0.17
   0 -20   2    0.07    0.18
   0 -20   2    0.03    0.24
   1 -20   2    1.65    0.32
   1 -20   2    1.92    0.28
   2 -20   2    1.09    0.26
   2 -20   2    0.83    0.25
  -3  20  -2    1.51    0.29
   3 -20   2    0.64    0.23
   3 -20   2    0.48    0.25
  -4  20  -2    0.61    0.25
   4 -20   2    0.28    0.22
   4 -20   2   -0.10    0.21
  -5  20  -2   -0.02    0.22
  -5  20  -2   -0.56    0.18
   5 -20   2    0.11    0.20
   5 -20   2   -0.41    0.20
  -6  20  -2    1.10    0.29
  -6  20  -2    0.40    0.24
   6 -20   2    1.31    0.29
  -7  20  -2   -0.73    0.19
  -7  20  -2   -0.07    0.23
   7 -20   2   -0.07    0.23
  -8  20  -2    0.09    0.24
  -8  20  -2   -0.27    0.21
   8 -20   2   -0.35    0.20
  -6 -19   2   -0.01    0.27
  -6 -19   2   -0.02    0.15
  -5 -19   2    0.00    0.15
  -5 -19   2   -0.36    0.25
  -4 -19   2   -0.12    0.25
  -4 -19   2   -0.04    0.15
  -3 -19   2    0.13    0.24
  -3 -19   2    0.43    0.19
  -2 -19   2   -0.16    0.20
  -2 -19   2   -0.10    0.16
  -1 -19   2   -0.24    0.21
  -1 -19   2    0.12    0.18
   0 -19   2    1.78    0.31
   0 -19   2    2.32    0.30
  -1  19  -2   -0.25    0.19
   1 -19   2    0.16    0.18
   1 -19   2   -0.10    0.21
  -2  19  -2    2.69    0.32
  -2  19  -2    2.96    0.27
   2 -19   2    1.98    0.29
   2 -19   2    3.17    0.35
  -3  19  -2    1.45    0.28
  -3  19  -2    1.21    0.22
   3 -19   2    1.45    0.26
   3 -19   2    1.30    0.28
  -4  19  -2   -0.57    0.16
  -4  19  -2   -0.15    0.21
   4 -19   2   -0.17    0.18
   4 -19   2   -0.32    0.19
  -5  19  -2    1.01    0.27
  -5  19  -2    0.31    0.21
   5 -19   2    0.83    0.24
   5 -19   2    0.03    0.22
  -6  19  -2   -0.56    0.17
  -6  19  -2    0.07    0.21
   6 -19   2    0.06    0.21
   6 -19   2   -0.62    0.18
  -7  19  -2    0.35    0.23
  -7  19  -2    0.08    0.20
   7 -19   2    0.35    0.23
  -8  19  -2   -0.30    0.20
  -8  19  -2    0.21    0.23
   8 -19   2   -0.14    0.21
  -9  19  -2    0.38    0.25
  -9  19  -2   -0.55    0.20
   9 -19   2    0.00    0.22
 -10  19  -2   -0.12    0.23
 -10  19  -2    0.23    0.25
  10 -19   2   -0.27    0.22
  -8 -18   2    0.14    0.13
  -8 -18   2   -0.07    0.24
  -7 -18   2    0.71    0.29
  -7 -18   2    0.17    0.14
  -6 -18   2    0.05    0.14
  -6 -18   2   -0.11    0.23
  -5 -18   2    0.20    0.15
  -5 -18   2    0.15    0.24
  -4 -18   2    0.97    0.28
  -4 -18   2    1.05    0.22
  -3 -18   2    0.93    0.29
  -3 -18   2    1.05    0.22
  -2 -18   2    0.83    0.29
  -2 -18   2    1.07    0.22
  -1 -18   2   -0.27    0.18
  -1 -18   2    0.07    0.17
   0  18  -2    0.40    0.21
   0 -18   2    0.23    0.19
   0 -18   2    0.33    0.21
  -1  18  -2    0.10    0.13
  -1  18  -2   -0.07    0.17
   1 -18   2    0.21    0.19
   1 -18   2   -0.36    0.18
  -2  18  -2    0.03    0.15
  -2  18  -2   -0.06    0.19
   2 -18   2    0.10    0.19
   2 -18   2    0.47    0.22
  -3  18  -2    1.06    0.25
  -3  18  -2    0.53    0.19
   3 -18   2    0.97    0.24
   3 -18   2    1.09    0.25
  -4  18  -2    1.27    0.28
  -4  18  -2    0.82    0.21
   4 -18   2    0.80    0.22
   4 -18   2    1.15    0.25
  -5  18  -2    0.92    0.26
  -5  18  -2    0.69    0.19
   5 -18   2    1.14    0.26
   5 -18   2    0.54    0.22
  -6  18  -2    0.37    0.23
  -6  18  -2   -0.06    0.18
   6 -18   2    0.12    0.21
   6 -18   2   -0.60    0.17
  -7  18  -2    0.69    0.25
  -7  18  -2    0.60    0.22
   7 -18   2    0.39    0.27
   7 -18   2    0.63    0.25
  -8  18  -2    0.03    0.20
  -8  18  -2    0.06    0.23
   8 -18   2    0.06    0.20
  -9  18  -2    0.44    0.22
  -9  18  -2    0.98    0.27
   9 -18   2    0.32    0.23
 -10  18  -2    0.37    0.25
 -10  18  -2    0.10    0.23
  10 -18   2   -0.01    0.21
 -11  18  -2    0.75    0.29
 -11  18  -2    0.43    0.24
  11 -18   2    0.56    0.31
  -9 -17   2   -0.07    0.11
  -9 -17   2   -0.20    0.23
  -8 -17   2    0.78    0.16
  -8 -17   2    0.84    0.30
  -7 -17   2    0.21    0.13
  -7 -17   2    0.27    0.27
  -6 -17   2    0.38    0.25
  -6 -17   2    0.67    0.17
  -5 -17   2    0.26    0.24
  -5 -17   2    0.31    0.16
  -4 -17   2   -0.04    0.14
  -4 -17   2   -0.31    0.23
  -3 -17   2    1.60    0.31
  -3 -17   2    1.70    0.23
  -2 -17   2    1.61    0.30
  -2 -17   2    1.72    0.24
   1  17  -2    0.01    0.16
  -1 -17   2    0.26    0.16
  -1 -17   2   -0.05    0.21
   0  17  -2    1.21    0.16
   0  17  -2    1.32    0.23
   0 -17   2    1.86    0.25
   0 -17   2    1.45    0.29
  -1  17  -2    6.26    0.32
  -1  17  -2    7.00    0.43
   1 -17   2    5.86    0.41
   1 -17   2    6.24    0.40
  -2  17  -2   -0.15    0.14
  -2  17  -2    0.10    0.19
   2 -17   2   -0.21    0.18
   2 -17   2    0.18    0.19
  -3  17  -2    0.78    0.23
  -3  17  -2    0.34    0.17
   3 -17   2    0.77    0.22
   3 -17   2    0.47    0.20
  -4  17  -2    0.51    0.24
  -4  17  -2    0.05    0.16
   4 -17   2    0.50    0.19
   4 -17   2    0.34    0.21
  -5  17  -2    0.86    0.21
  -5  17  -2    1.27    0.27
  -5  17  -2    0.86    0.17
   5 -17   2    0.76    0.22
   5 -17   2    1.16    0.25
  -6  17  -2    2.21    0.25
  -6  17  -2    2.49    0.24
  -6  17  -2    2.83    0.34
   6 -17   2    2.83    0.32
   6 -17   2    1.85    0.25
  -7  17  -2    0.10    0.14
  -7  17  -2    0.26    0.19
  -7  17  -2    0.09    0.22
   7 -17   2   -0.26    0.17
   7 -17   2   -0.09    0.19
  -8  17  -2   -0.08    0.16
  -8  17  -2   -0.26    0.19
  -8  17  -2    0.07    0.15
   8 -17   2    0.14    0.21
  -9  17  -2    4.27    0.42
  -9  17  -2    4.30    0.40
  -9  17  -2    3.98    0.34
   9 -17   2    3.57    0.37
 -10  17  -2    1.80    0.32
 -10  17  -2    1.43    0.24
 -10  17  -2    0.92    0.25
  10 -17   2    1.52    0.28
 -11  17  -2    1.02    0.25
 -11  17  -2    1.68    0.31
 -11  17  -2    1.31    0.25
  11 -17   2    1.26    0.29
 -12  17  -2   -0.12    0.21
 -12  17  -2   -0.21    0.22
 -12  17  -2    0.00    0.20
 -10 -16   2    5.45    0.26
 -10 -16   2    5.09    0.55
  -9 -16   2   -0.04    0.26
  -9 -16   2   -0.14    0.10
  -8 -16   2    0.35    0.27
  -8 -16   2    0.21    0.13
  -7 -16   2    0.06    0.12
  -7 -16   2    0.09    0.23
  -6 -16   2    3.73    0.44
  -6 -16   2    3.70    0.28
  -5 -16   2   -0.01    0.23
  -5 -16   2    0.02    0.13
  -4 -16   2    1.72    0.31
  -4 -16   2    1.68    0.22
  -3 -16   2    8.86    0.41
  -3 -16   2    9.97    0.57
   2  16  -2    0.03    0.16
  -2 -16   2    0.24    0.15
  -2 -16   2   -0.24    0.18
   1  16  -2    9.19    0.44
  -1 -16   2    9.62    0.44
  -1 -16   2    9.87    0.65
  -1 -16   2    8.83    0.51
   0  16  -2    5.53    0.37
   0  16  -2    5.14    0.28
   0 -16   2    5.13    0.41
   0 -16   2    4.99    0.38
   0 -16   2    5.44    0.36
   0 -16   2    5.05    0.27
  -1  16  -2    0.03    0.12
  -1  16  -2    0.00    0.17
   1 -16   2   -0.27    0.17
   1 -16   2    0.27    0.17
  -2  16  -2    1.22    0.24
  -2  16  -2    1.03    0.18
  -2  16  -2    1.01    0.09
   2 -16   2    1.07    0.23
   2 -16   2    1.32    0.23
  -3  16  -2    3.88    0.18
  -3  16  -2    3.46    0.32
  -3  16  -2    3.71    0.29
   3 -16   2    4.08    0.36
   3 -16   2    3.49    0.32
  -4  16  -2    0.20    0.10
  -4  16  -2    0.38    0.21
  -4  16  -2    0.01    0.15
   4 -16   2    0.17    0.19
   4 -16   2    0.21    0.17
  -5  16  -2    0.09    0.20
  -5  16  -2    0.08    0.11
  -5  16  -2   -0.14    0.13
   5 -16   2   -0.06    0.16
   5 -16   2    0.05    0.18
  -6  16  -2    1.09    0.17
  -6  16  -2    1.02    0.21
  -6  16  -2    1.28    0.27
   6 -16   2    1.48    0.27
   6 -16   2    1.07    0.21
  -7  16  -2    0.25    0.21
  -7  16  -2    0.21    0.15
  -7  16  -2    0.33    0.17
   7 -16   2   -0.12    0.17
   7 -16   2   -0.13    0.18
  -8  16  -2    1.67    0.30
  -8  16  -2    1.40    0.23
  -8  16  -2    1.38    0.21
   8 -16   2    1.62    0.28
   8 -16   2    1.59    0.20
  -9  16  -2    3.26    0.31
  -9  16  -2    2.83    0.31
  -9  16  -2    4.06    0.39
   9 -16   2    3.73    0.37
 -10  16  -2    0.70    0.20
 -10  16  -2    0.75    0.22
 -10  16  -2    0.78    0.25
  10 -16   2    0.55    0.23
 -11  16  -2    0.74    0.25
 -11  16  -2    0.88    0.26
 -11  16  -2    0.88    0.21
  11 -16   2    0.64    0.24
 -12  16  -2    0.86    0.27
 -12  16  -2    0.68    0.25
 -12  16  -2    0.40    0.22
 -13  16  -2    0.47    0.23
 -13  16  -2    0.52    0.25
 -13  16  -2    0.08    0.22
 -11 -15   2    3.46    0.44
 -11 -15   2    3.19    0.17
 -10 -15   2    2.05    0.18
 -10 -15   2    2.04    0.37
  -9 -15   2    0.00    0.23
  -9 -15   2   -0.13    0.09
  -8 -15   2    0.01    0.22
  -8 -15   2    0.10    0.11
  -7 -15   2    0.28    0.13
  -7 -15   2    0.63    0.26
  -6 -15   2    4.62    0.43
  -6 -15   2    4.53    0.29
  -5 -15   2    1.75    0.20
  -5 -15   2    1.42    0.30
   4  15  -2    5.21    0.39
  -4 -15   2    4.97    0.31
  -4 -15   2    4.60    0.44
   3  15  -2   17.83    0.55
  -3 -15   2   17.57    0.55
  -3 -15   2   16.94    0.68
  -3 -15   2   16.98    0.43
   2  15  -2    7.39    0.37
  -2 -15   2    7.34    0.38
  -2 -15   2    6.85    0.47
  -2 -15   2    7.03    0.39
  -2 -15   2    6.83    0.27
   1  15  -2    3.61    0.30
  -1 -15   2    2.50    0.25
  -1 -15   2    2.71    0.31
  -1 -15   2    2.68    0.20
  -1 -15   2    3.21    0.30
   0  15  -2    0.09    0.10
   0  15  -2    0.03    0.15
   0 -15   2    0.16    0.15
   0 -15   2    0.21    0.15
   0 -15   2   -0.13    0.17
   0 -15   2    0.05    0.10
  -1  15  -2    0.79    0.16
  -1  15  -2    1.25    0.22
   1 -15   2    1.15    0.16
   1 -15   2    1.41    0.24
   1 -15   2    1.24    0.21
  -2  15  -2    1.44    0.11
  -2  15  -2    1.28    0.18
  -2  15  -2    1.52    0.11
  -2  15  -2    1.64    0.24
  -2  15  -2    1.90    0.11
   2 -15   2    1.88    0.25
   2 -15   2    1.23    0.22
  -3  15  -2    2.89    0.26
  -3  15  -2    3.31    0.31
  -3  15  -2    2.60    0.16
  -3  15  -2    2.76    0.16
  -3  15  -2    3.13    0.16
   3 -15   2    2.82    0.28
   3 -15   2    3.28    0.30
  -4  15  -2    0.47    0.11
  -4  15  -2    0.43    0.19
  -4  15  -2    0.47    0.11
  -4  15  -2    0.13    0.15
   4 -15   2    0.18    0.17
   4 -15   2    0.19    0.16
  -5  15  -2    2.69    0.30
  -5  15  -2    3.34    0.30
  -5  15  -2    3.28    0.23
  -5  15  -2    2.90    0.21
   5 -15   2    3.29    0.32
   5 -15   2    3.15    0.28
  -6  15  -2    1.75    0.28
  -6  15  -2    1.57    0.18
  -6  15  -2    1.55    0.20
  -6  15  -2    1.53    0.22
   6 -15   2    1.09    0.21
   6 -15   2    1.63    0.27
  -7  15  -2    2.95    0.27
  -7  15  -2    3.07    0.29
  -7  15  -2    3.55    0.35
   7 -15   2    2.72    0.28
   7 -15   2    3.73    0.34
  -8  15  -2    2.58    0.33
  -8  15  -2    2.17    0.24
  -8  15  -2    1.91    0.25
   8 -15   2    2.22    0.24
   8 -15   2    2.42    0.30
  -9  15  -2    1.75    0.25
  -9  15  -2    1.91    0.24
  -9  15  -2    2.21    0.31
   9 -15   2    1.81    0.27
 -10  15  -2    0.35    0.19
 -10  15  -2   -0.04    0.17
 -10  15  -2    0.17    0.21
  10 -15   2   -0.02    0.20
 -11  15  -2    0.88    0.23
 -11  15  -2    0.77    0.25
 -11  15  -2    0.78    0.21
  11 -15   2    1.02    0.24
 -12  15  -2    0.26    0.22
 -12  15  -2    0.23    0.19
 -12  15  -2    0.11    0.22
 -13  15  -2   -0.32    0.19
 -13  15  -2    0.05    0.22
 -13  15  -2   -0.02    0.20
 -12 -14   2    0.13    0.28
 -11 -14   2    0.31    0.08
 -11 -14   2    0.24    0.26
 -10 -14   2    2.17    0.38
 -10 -14   2    2.11    0.17
  -9 -14   2   -0.25    0.20
  -9 -14   2    0.09    0.09
  -8 -14   2    0.11    0.21
  -8 -14   2    0.10    0.10
  -7 -14   2    8.69    0.54
  -7 -14   2    9.15    0.35
  -6 -14   2   -0.12    0.21
  -6 -14   2    0.07    0.11
   5  14  -2   23.98    0.65
  -5 -14   2   23.63    0.55
  -5 -14   2   25.24    0.63
  -5 -14   2   25.19    0.86
   4  14  -2   12.48    0.43
  -4 -14   2   12.45    0.46
  -4 -14   2   11.62    0.57
  -4 -14   2   12.09    0.34
  -4 -14   2   11.94    0.43
   3  14  -2    4.21    0.29
  -3 -14   2    3.98    0.30
  -3 -14   2    3.91    0.28
  -3 -14   2    3.97    0.36
  -3 -14   2    3.97    0.20
   2  14  -2    1.69    0.21
  -2 -14   2    1.12    0.12
  -2 -14   2    1.20    0.18
  -2 -14   2    1.11    0.19
  -2 -14   2    0.97    0.23
   1  14  -2    0.14    0.14
  -1 -14   2    0.13    0.13
  -1 -14   2    0.12    0.16
  -1 -14   2    0.06    0.08
  -1 -14   2    0.14    0.13
   0  14  -2    2.78    0.20
   0  14  -2    2.47    0.24
   0 -14   2    3.30    0.29
   0 -14   2    2.57    0.20
   0 -14   2    2.66    0.24
   0 -14   2    2.57    0.28
  -1  14  -2    7.88    0.18
  -1  14  -2    7.90    0.39
  -1  14  -2    7.77    0.31
  -1  14  -2    7.49    0.19
   1 -14   2    8.33    0.41
   1 -14   2    7.55    0.30
   1 -14   2    8.32    0.40
   1 -14   2    8.21    0.38
  -2  14  -2    0.84    0.15
  -2  14  -2    1.35    0.11
  -2  14  -2    1.17    0.11
  -2  14  -2    1.00    0.20
  -2  14  -2    1.05    0.10
   2 -14   2    0.77    0.18
   2 -14   2    0.93    0.17
   2 -14   2    1.02    0.18
  -3  14  -2   -0.05    0.12
  -3  14  -2   -0.05    0.08
  -3  14  -2    0.04    0.08
  -3  14  -2   -0.16    0.15
   3 -14   2   -0.18    0.13
   3 -14   2   -0.12    0.13
  -4  14  -2    2.42    0.18
  -4  14  -2    3.02    0.26
  -4  14  -2    3.04    0.19
  -4  14  -2    2.90    0.30
   4 -14   2    2.62    0.27
   4 -14   2    2.56    0.27
  -5  14  -2    0.02    0.11
  -5  14  -2    0.22    0.18
  -5  14  -2   -0.05    0.12
  -5  14  -2   -0.02    0.10
   5 -14   2   -0.02    0.14
   5 -14   2    0.04    0.17
  -6  14  -2    2.02    0.27
  -6  14  -2    1.91    0.21
  -6  14  -2    1.87    0.20
  -6  14  -2    2.04    0.20
   6 -14   2    2.20    0.28
   6 -14   2    2.22    0.23
  -7  14  -2    3.89    0.28
  -7  14  -2    4.67    0.39
  -7  14  -2    4.13    0.33
   7 -14   2    4.17    0.28
   7 -14   2    4.08    0.36
  -8  14  -2    1.09    0.20
  -8  14  -2    1.21    0.20
  -8  14  -2    1.25    0.25
   8 -14   2    1.09    0.23
   8 -14   2    1.34    0.17
  -9  14  -2   17.00    0.65
  -9  14  -2   17.27    0.59
  -9  14  -2   17.29    0.61
   9 -14   2   17.43    0.63
   9 -14   2   18.23    0.49
 -10  14  -2    1.69    0.25
 -10  14  -2    2.00    0.29
 -10  14  -2    1.44    0.26
  10 -14   2    1.47    0.26
 -11  14  -2    0.66    0.22
 -11  14  -2    1.12    0.26
 -11  14  -2    0.61    0.20
  11 -14   2    1.13    0.25
 -12  14  -2    5.83    0.43
 -12  14  -2    6.22    0.44
 -12  14  -2    6.17    0.47
 -13  14  -2    0.75    0.25
 -13  14  -2    0.83    0.25
 -13  14  -2    0.90    0.26
 -14  14  -2    2.29    0.34
 -14  14  -2    1.21    0.28
 -14  14  -2    2.05    0.31
 -13 -13   2   -0.05    0.26
 -12 -13   2   -0.13    0.22
 -11 -13   2    1.14    0.30
 -11 -13   2    1.29    0.10
 -10 -13   2    0.73    0.28
 -10 -13   2    0.95    0.11
  -9 -13   2    0.50    0.15
  -9 -13   2    0.99    0.28
  -9 -13   2    0.46    0.20
  -9 -13   2    0.87    0.12
  -8 -13   2    4.82    0.23
  -8 -13   2    5.17    0.45
  -8 -13   2    4.94    0.24
  -7 -13   2    7.70    0.50
  -7 -13   2    7.43    0.30
  -7 -13   2    6.74    0.24
  -6 -13   2    8.93    0.27
  -6 -13   2    8.38    0.35
  -6 -13   2    8.81    0.23
  -6 -13   2    8.27    0.29
  -6 -13   2    9.26    0.52
  -6 -13   2    8.75    0.33
   5  13  -2   17.50    0.48
  -5 -13   2   17.37    0.32
  -5 -13   2   17.07    0.42
  -5 -13   2   16.67    0.49
  -5 -13   2   18.60    0.70
  -5 -13   2   17.30    0.52
   4  13  -2    0.39    0.13
  -4 -13   2    0.18    0.08
  -4 -13   2    0.60    0.23
  -4 -13   2    0.48    0.13
  -4 -13   2    0.31    0.13
   3  13  -2   10.49    0.38
  -3 -13   2   10.28    0.30
  -3 -13   2   10.89    0.52
  -3 -13   2   10.11    0.40
  -3 -13   2   10.42    0.38
   2  13  -2    2.14    0.22
  -2 -13   2    1.78    0.20
  -2 -13   2    1.47    0.23
  -2 -13   2    1.75    0.15
  -2 -13   2    1.98    0.19
   1  13  -2    0.43    0.15
   1  13  -2    0.26    0.09
  -1 -13   2    0.30    0.14
  -1 -13   2    0.15    0.12
  -1 -13   2    0.30    0.09
  -1 -13   2    0.31    0.16
   0  13  -2    0.48    0.11
   0  13  -2    0.54    0.05
   0  13  -2    0.66    0.16
   0 -13   2    0.54    0.17
   0 -13   2    0.42    0.14
   0 -13   2    0.48    0.11
   0 -13   2    0.41    0.15
  -1  13  -2   22.56    0.62
  -1  13  -2   20.68    0.39
  -1  13  -2   21.24    0.52
  -1  13  -2   20.76    0.38
   1 -13   2   20.51    0.60
   1 -13   2   21.65    0.63
   1 -13   2   21.45    0.53
   1 -13   2   20.81    0.63
  -2  13  -2    0.97    0.15
  -2  13  -2    1.54    0.22
  -2  13  -2    1.44    0.11
  -2  13  -2    1.30    0.11
   2 -13   2    1.29    0.20
   2 -13   2    1.06    0.18
   2 -13   2    1.27    0.20
   2 -13   2    1.07    0.14
  -3  13  -2   21.96    0.55
  -3  13  -2   20.41    0.47
  -3  13  -2   21.97    0.64
   3 -13   2   20.97    0.61
   3 -13   2   20.81    0.59
  -4  13  -2    9.05    0.35
  -4  13  -2    8.82    0.30
  -4  13  -2    8.46    0.30
  -4  13  -2    8.85    0.41
   4 -13   2    9.15    0.41
   4 -13   2    8.62    0.36
  -5  13  -2   12.66    0.43
  -5  13  -2   13.19    0.51
  -5  13  -2   12.44    0.39
  -5  13  -2   12.53    0.38
  -5  13  -2   12.99    0.47
   5 -13   2   12.32    0.42
   5 -13   2   13.14    0.50
  -6  13  -2   12.01    0.41
  -6  13  -2   11.84    0.44
  -6  13  -2   11.46    0.49
  -6  13  -2   12.29    0.44
  -6  13  -2   12.09    0.40
   6 -13   2   11.69    0.41
   6 -13   2   11.97    0.49
  -7  13  -2    0.57    0.17
  -7  13  -2    0.36    0.14
  -7  13  -2    0.53    0.21
  -7  13  -2    0.35    0.17
   7 -13   2    0.58    0.19
   7 -13   2    0.43    0.15
  -8  13  -2    0.94    0.16
  -8  13  -2    1.01    0.19
  -8  13  -2    0.73    0.19
  -8  13  -2    0.52    0.21
   8 -13   2    0.74    0.21
   8 -13   2    1.06    0.14
  -9  13  -2    4.92    0.35
  -9  13  -2    5.43    0.37
  -9  13  -2    5.04    0.41
   9 -13   2    5.70    0.39
   9 -13   2    6.15    0.27
 -10  13  -2    6.23    0.37
 -10  13  -2    6.88    0.44
 -10  13  -2    6.64    0.41
  10 -13   2    6.46    0.41
 -11  13  -2   -0.08    0.18
 -11  13  -2   -0.29    0.17
 -11  13  -2    0.25    0.19
  11 -13   2   -0.06    0.17
 -12  13  -2    2.29    0.29
 -12  13  -2    2.64    0.32
 -12  13  -2    2.34    0.30
 -13  13  -2    1.03    0.24
 -13  13  -2    0.56    0.22
 -13  13  -2    0.94    0.25
 -14  13  -2    0.64    0.24
 -14  13  -2    0.76    0.24
 -14  13  -2    0.66    0.24
 -13 -12   2    1.47    0.35
 -12 -12   2    0.09    0.26
 -11 -12   2    0.43    0.05
 -11 -12   2    0.82    0.28
 -11 -12   2    0.36    0.14
 -10 -12   2    6.15    0.21
 -10 -12   2    6.74    0.35
 -10 -12   2    6.21    0.30
 -10 -12   2    6.50    0.52
  -9 -12   2    2.26    0.16
  -9 -12   2    2.11    0.34
  -9 -12   2    2.08    0.19
  -9 -12   2    2.00    0.20
  -8 -12   2    1.07    0.13
  -8 -12   2    1.11    0.15
  -8 -12   2    0.91    0.13
  -8 -12   2    1.23    0.27
  -8 -12   2    1.02    0.14
   7  12  -2    2.86    0.18
  -7 -12   2    2.88    0.22
  -7 -12   2    3.22    0.21
  -7 -12   2    3.08    0.20
  -7 -12   2    2.91    0.20
  -7 -12   2    2.96    0.18
  -7 -12   2    3.33    0.37
   6  12  -2   -0.02    0.06
  -6 -12   2    0.19    0.11
  -6 -12   2    0.07    0.09
  -6 -12   2    0.02    0.08
  -6 -12   2    0.08    0.09
  -6 -12   2    0.20    0.22
  -6 -12   2   -0.10    0.09
   5  12  -2   13.85    0.40
  -5 -12   2   14.05    0.41
  -5 -12   2   13.38    0.28
  -5 -12   2   13.77    0.44
  -5 -12   2   13.68    0.59
  -5 -12   2   14.01    0.33
  -5 -12   2   13.39    0.36
   4  12  -2    0.69    0.13
  -4 -12   2    0.57    0.10
  -4 -12   2    0.57    0.13
  -4 -12   2    0.61    0.19
  -4 -12   2    0.72    0.13
   3  12  -2    0.04    0.06
   3  12  -2    0.15    0.11
  -3 -12   2    0.02    0.07
  -3 -12   2   -0.01    0.14
  -3 -12   2    0.00    0.10
  -3 -12   2    0.16    0.11
   2  12  -2   -0.08    0.10
   2  12  -2    0.03    0.05
  -2 -12   2   -0.01    0.06
  -2 -12   2    0.09    0.11
  -2 -12   2    0.00    0.13
  -2 -12   2    0.02    0.10
   1  12  -2   12.34    0.42
   1  12  -2   12.01    0.25
   1  12  -2   12.12    0.35
  -1 -12   2   12.71    0.42
  -1 -12   2   12.43    0.34
  -1 -12   2   13.14    0.44
  -1 -12   2   12.27    0.48
   0  12  -2    1.74    0.21
   0  12  -2    1.28    0.14
   0  12  -2    1.57    0.09
   0 -12   2    1.61    0.22
   0 -12   2    1.33    0.13
   0 -12   2    1.38    0.17
   0 -12   2    1.52    0.18
  -1  12  -2    1.49    0.09
  -1  12  -2    1.52    0.09
  -1  12  -2    1.44    0.15
  -1  12  -2    1.68    0.21
   1 -12   2    1.73    0.21
   1 -12   2    1.70    0.15
   1 -12   2    1.68    0.19
   1 -12   2    1.72    0.22
  -2  12  -2    0.01    0.10
  -2  12  -2    0.06    0.06
  -2  12  -2   -0.15    0.12
   2 -12   2    0.20    0.13
   2 -12   2    0.11    0.13
   2 -12   2    0.01    0.09
   2 -12   2    0.17    0.12
  -3  12  -2    0.89    0.18
  -3  12  -2    0.80    0.14
  -3  12  -2    0.89    0.11
  -3  12  -2    1.11    0.18
   3 -12   2    0.82    0.15
   3 -12   2    0.92    0.16
   3 -12   2    0.89    0.17
  -4  12  -2    0.36    0.13
  -4  12  -2    0.50    0.14
  -4  12  -2    0.24    0.15
  -4  12  -2    0.32    0.10
   4 -12   2    0.38    0.13
   4 -12   2    0.39    0.15
  -5  12  -2    1.26    0.16
  -5  12  -2    1.71    0.19
  -5  12  -2    1.40    0.21
  -5  12  -2    1.32    0.17
  -5  12  -2    1.21    0.18
   5 -12   2    1.18    0.17
   5 -12   2    1.80    0.22
  -6  12  -2   -0.08    0.15
  -6  12  -2    0.07    0.11
  -6  12  -2   -0.02    0.11
  -6  12  -2   -0.03    0.11
  -6  12  -2   -0.04    0.13
   6 -12   2    0.01    0.12
   6 -12   2   -0.07    0.13
  -7  12  -2   13.44    0.46
  -7  12  -2   12.78    0.51
  -7  12  -2   12.95    0.42
  -7  12  -2   13.01    0.49
   7 -12   2   14.04    0.51
   7 -12   2   13.43    0.40
  -8  12  -2   -0.01    0.11
  -8  12  -2   -0.06    0.17
  -8  12  -2    0.02    0.14
  -8  12  -2    0.01    0.13
   8 -12   2    0.10    0.10
   8 -12   2    0.10    0.15
  -9  12  -2    2.03    0.26
  -9  12  -2    1.98    0.26
  -9  12  -2    2.49    0.21
  -9  12  -2    1.99    0.26
   9 -12   2    2.06    0.26
   9 -12   2    2.38    0.20
 -10  12  -2    0.40    0.18
 -10  12  -2    0.34    0.20
 -10  12  -2    0.00    0.17
  10 -12   2    0.30    0.19
  10 -12   2    0.42    0.11
 -11  12  -2    1.37    0.24
 -11  12  -2    1.41    0.25
 -11  12  -2    1.10    0.23
  11 -12   2    1.50    0.24
 -12  12  -2    0.25    0.19
 -12  12  -2    0.20    0.20
 -12  12  -2    0.07    0.20
 -13  12  -2    1.42    0.25
 -13  12  -2    1.44    0.27
 -13  12  -2    1.64    0.28
 -14  12  -2    1.67    0.31
 -14  12  -2    1.07    0.26
 -14  12  -2    0.96    0.25
 -15  12  -2   -0.23    0.20
 -15  12  -2   -0.01    0.19
 -15  12  -2   -0.23    0.19
 -14 -11   2    0.22    0.23
 -13 -11   2    0.75    0.27
 -13 -11   2    0.65    0.18
 -12 -11   2    1.00    0.18
 -12 -11   2    0.98    0.27
 -12 -11   2    1.19    0.20
 -11 -11   2    3.71    0.27
 -11 -11   2    4.78    0.33
 -11 -11   2    4.40    0.46
 -10 -11   2    9.85    0.24
 -10 -11   2   10.88    0.42
 -10 -11   2   10.17    0.37
 -10 -11   2    9.94    0.26
 -10 -11   2   10.80    0.58
  -9 -11   2   15.40    0.36
  -9 -11   2   15.51    0.50
  -9 -11   2   15.58    0.67
  -9 -11   2   16.23    0.45
  -9 -11   2   16.39    0.39
   8  11  -2    0.23    0.07
  -8 -11   2    0.12    0.08
  -8 -11   2   -0.05    0.19
  -8 -11   2    0.29    0.10
  -8 -11   2    0.32    0.09
  -8 -11   2    0.15    0.12
   7  11  -2    0.24    0.08
  -7 -11   2    0.19    0.10
  -7 -11   2    0.25    0.09
  -7 -11   2    0.28    0.19
  -7 -11   2    0.13    0.08
  -7 -11   2    0.07    0.08
  -7 -11   2    0.09    0.08
   6  11  -2    0.11    0.08
  -6 -11   2    0.14    0.17
  -6 -11   2    0.18    0.09
  -6 -11   2    0.25    0.08
  -6 -11   2    0.24    0.09
  -6 -11   2    0.07    0.07
  -6 -11   2    0.18    0.09
   5  11  -2    2.39    0.17
  -5 -11   2    2.48    0.16
  -5 -11   2    2.32    0.12
  -5 -11   2    2.43    0.18
  -5 -11   2    2.47    0.29
  -5 -11   2    2.38    0.19
  -5 -11   2    2.43    0.14
   4  11  -2    4.14    0.22
   4  11  -2    4.07    0.18
  -4 -11   2    4.15    0.11
  -4 -11   2    4.01    0.22
  -4 -11   2    3.81    0.18
  -4 -11   2    4.17    0.24
  -4 -11   2    4.39    0.33
   3  11  -2    1.29    0.11
   3  11  -2    1.20    0.14
  -3 -11   2    1.45    0.17
  -3 -11   2    1.06    0.10
  -3 -11   2    1.20    0.20
  -3 -11   2    0.95    0.14
   2  11  -2   17.29    0.35
   2  11  -2   17.45    0.48
  -2 -11   2   17.77    0.41
  -2 -11   2   17.48    0.50
  -2 -11   2   17.57    0.48
  -2 -11   2   17.90    0.58
   1  11  -2   18.87    0.44
   1  11  -2   18.44    0.51
   1  11  -2   17.73    0.35
  -1 -11   2   17.85    0.58
  -1 -11   2   18.12    0.42
  -1 -11   2   18.24    0.50
  -1 -11   2   19.00    0.53
   0  11  -2   12.72    0.35
   0  11  -2   11.76    0.41
   0  11  -2   11.95    0.25
   0 -11   2   11.97    0.42
   0 -11   2   12.14    0.44
   0 -11   2   12.37    0.41
   0 -11   2   11.69    0.33
  -1  11  -2   11.94    0.35
  -1  11  -2   11.76    0.25
  -1  11  -2   11.54    0.25
  -1  11  -2   11.41    0.41
   1 -11   2   11.73    0.42
   1 -11   2   12.20    0.43
   1 -11   2   12.26    0.41
   1 -11   2   11.83    0.35
  -2  11  -2   38.52    0.90
  -2  11  -2   38.61    0.79
  -2  11  -2   38.92    0.87
  -2  11  -2   38.63    0.72
   2 -11   2   38.04    0.80
   2 -11   2   38.06    0.86
   2 -11   2   39.38    0.89
   2 -11   2   37.75    0.86
  -3  11  -2    5.73    0.30
  -3  11  -2    5.72    0.32
  -3  11  -2    5.72    0.22
  -3  11  -2    5.64    0.26
   3 -11   2    5.64    0.27
   3 -11   2    4.94    0.25
   3 -11   2    5.30    0.28
   3 -11   2    5.78    0.32
  -4  11  -2    2.02    0.20
  -4  11  -2    1.72    0.17
  -4  11  -2    1.62    0.15
  -4  11  -2    1.66    0.21
   4 -11   2    1.78    0.20
   4 -11   2    2.00    0.20
  -5  11  -2    0.03    0.10
  -5  11  -2    0.07    0.14
  -5  11  -2   -0.04    0.10
  -5  11  -2    0.03    0.10
   5 -11   2    0.05    0.12
   5 -11   2    0.06    0.11
  -6  11  -2    7.19    0.37
  -6  11  -2    6.98    0.31
  -6  11  -2    7.19    0.31
  -6  11  -2    7.03    0.30
  -6  11  -2    7.05    0.34
   6 -11   2    6.81    0.28
   6 -11   2    7.52    0.36
  -7  11  -2   11.70    0.38
  -7  11  -2   12.16    0.47
  -7  11  -2   11.66    0.45
  -7  11  -2   11.74    0.43
   7 -11   2   11.66    0.45
   7 -11   2   12.05    0.36
  -8  11  -2    0.45    0.16
  -8  11  -2    0.52    0.12
  -8  11  -2    0.54    0.17
  -8  11  -2    0.75    0.19
   8 -11   2    0.74    0.12
   8 -11   2    0.78    0.17
  -9  11  -2    0.41    0.18
  -9  11  -2    0.36    0.11
  -9  11  -2    0.23    0.16
  -9  11  -2    0.32    0.20
  -9  11  -2    0.19    0.16
   9 -11   2    0.49    0.11
   9 -11   2    0.24    0.16
 -10  11  -2    8.69    0.43
 -10  11  -2    8.55    0.44
 -10  11  -2    8.24    0.44
 -10  11  -2    8.08    0.41
  10 -11   2    8.86    0.42
 -11  11  -2    4.17    0.37
 -11  11  -2    3.80    0.35
 -11  11  -2    4.26    0.35
  11 -11   2    4.55    0.34
 -12  11  -2    0.16    0.18
 -12  11  -2    0.06    0.18
 -12  11  -2   -0.02    0.16
 -13  11  -2    0.24    0.18
 -13  11  -2    0.11    0.19
 -13  11  -2    0.19    0.19
 -14  11  -2    0.07    0.17
 -14  11  -2   -0.05    0.22
 -14  11  -2    0.00    0.19
 -15  11  -2    0.38    0.23
 -15  11  -2    0.39    0.20
 -15  11  -2    0.18    0.22
 -15 -10   2    0.77    0.29
 -14 -10   2    0.53    0.24
 -14 -10   2   -0.02    0.15
 -13 -10   2   -0.04    0.15
 -13 -10   2    0.07    0.14
 -13 -10   2    0.07    0.22
 -12 -10   2    1.76    0.22
 -12 -10   2    1.76    0.31
 -12 -10   2    1.62    0.23
 -11 -10   2   -0.12    0.12
 -11 -10   2   -0.15    0.12
 -11 -10   2   -0.04    0.18
 -10 -10   2    4.33    0.13
 -10 -10   2    4.53    0.26
 -10 -10   2    4.61    0.13
 -10 -10   2    4.01    0.30
 -10 -10   2    4.60    0.43
  -9 -10   2    0.10    0.06
  -9 -10   2    0.09    0.11
  -9 -10   2    0.15    0.19
  -9 -10   2    0.05    0.06
  -9 -10   2    0.16    0.12
   8  10  -2    0.11    0.05
  -8 -10   2    0.07    0.09
  -8 -10   2    0.03    0.06
  -8 -10   2    0.04    0.07
  -8 -10   2    0.12    0.11
  -8 -10   2    0.12    0.18
   7  10  -2    1.67    0.13
  -7 -10   2    1.86    0.15
  -7 -10   2    1.77    0.26
  -7 -10   2    1.84    0.16
  -7 -10   2    1.80    0.17
  -7 -10   2    1.68    0.14
   6  10  -2    2.68    0.15
   6  10  -2    2.20    0.18
  -6 -10   2    2.84    0.17
  -6 -10   2    2.30    0.16
  -6 -10   2    2.45    0.14
  -6 -10   2    2.44    0.16
  -6 -10   2    2.27    0.29
  -6 -10   2    2.53    0.18
   5  10  -2    6.82    0.25
  -5 -10   2    6.30    0.38
  -5 -10   2    6.45    0.23
  -5 -10   2    6.14    0.24
  -5 -10   2    6.54    0.26
  -5 -10   2    6.53    0.19
  -5 -10   2    6.83    0.22
   4  10  -2    1.47    0.13
   4  10  -2    1.84    0.15
  -4 -10   2    1.21    0.08
  -4 -10   2    1.34    0.22
  -4 -10   2    1.26    0.14
  -4 -10   2    1.27    0.11
  -4 -10   2    1.36    0.14
  -4 -10   2    1.44    0.11
   3  10  -2   10.98    0.28
   3  10  -2   11.16    0.34
  -3 -10   2   11.60    0.46
  -3 -10   2   10.10    0.33
  -3 -10   2   11.16    0.36
  -3 -10   2   11.41    0.29
   2  10  -2    6.61    0.19
   2  10  -2    6.80    0.27
  -2 -10   2    6.65    0.22
  -2 -10   2    6.58    0.28
  -2 -10   2    6.41    0.34
  -2 -10   2    6.49    0.27
   1  10  -2   24.95    0.60
   1  10  -2   24.95    0.47
   1  10  -2   26.16    0.54
  -1 -10   2   25.23    0.53
  -1 -10   2   24.93    0.68
  -1 -10   2   25.52    0.62
  -1 -10   2   24.62    0.59
   0  10  -2    0.25    0.09
   0  10  -2    0.37    0.06
   0  10  -2    0.10    0.11
   0 -10   2    0.30    0.08
   0 -10   2    0.16    0.12
   0 -10   2    0.03    0.11
   0 -10   2    0.18    0.12
  -1  10  -2    4.31    0.26
  -1  10  -2    4.13    0.14
  -1  10  -2    4.66    0.27
  -1  10  -2    4.42    0.20
  -1  10  -2    4.22    0.26
   1 -10   2    4.43    0.21
   1 -10   2    4.67    0.27
   1 -10   2    4.43    0.25
   1 -10   2    4.26    0.26
  -2  10  -2    4.46    0.26
  -2  10  -2    4.10    0.26
  -2  10  -2    4.12    0.16
  -2  10  -2    4.32    0.21
  -2  10  -2    4.02    0.26
   2 -10   2    4.10    0.23
   2 -10   2    4.16    0.22
   2 -10   2    4.17    0.26
   2 -10   2    4.15    0.25
  -3  10  -2    3.28    0.24
  -3  10  -2    3.66    0.23
  -3  10  -2    3.39    0.25
  -3  10  -2    3.61    0.20
  -3  10  -2    3.37    0.18
   3 -10   2    3.62    0.25
   3 -10   2    3.60    0.26
   3 -10   2    3.50    0.23
   3 -10   2    3.50    0.21
  -4  10  -2    0.01    0.10
  -4  10  -2    0.08    0.12
  -4  10  -2   -0.03    0.08
  -4  10  -2   -0.05    0.11
  -4  10  -2    0.05    0.08
   4 -10   2    0.19    0.12
   4 -10   2    0.05    0.12
   4 -10   2    0.04    0.09
   4 -10   2   -0.05    0.10
  -5  10  -2    5.84    0.31
  -5  10  -2    5.65    0.26
  -5  10  -2    6.45    0.32
  -5  10  -2    5.97    0.27
  -5  10  -2    5.79    0.28
   5 -10   2    5.68    0.29
   5 -10   2    5.86    0.25
  -6  10  -2    0.64    0.12
  -6  10  -2    0.71    0.14
  -6  10  -2    0.43    0.16
  -6  10  -2    0.79    0.17
  -6  10  -2    0.56    0.14
   6 -10   2    0.87    0.17
   6 -10   2    0.96    0.13
  -7  10  -2    0.94    0.18
  -7  10  -2    1.03    0.17
  -7  10  -2    1.31    0.19
  -7  10  -2    1.18    0.18
  -7  10  -2    1.38    0.15
   7 -10   2    1.31    0.14
   7 -10   2    1.26    0.19
  -8  10  -2    0.96    0.13
  -8  10  -2    1.27    0.20
  -8  10  -2    1.19    0.20
  -8  10  -2    1.12    0.18
  -8  10  -2    0.82    0.18
   8 -10   2    1.22    0.19
   8 -10   2    1.02    0.13
  -9  10  -2    7.85    0.39
  -9  10  -2    7.74    0.38
  -9  10  -2    7.15    0.27
  -9  10  -2    7.37    0.39
  -9  10  -2    7.51    0.39
   9 -10   2    7.67    0.38
   9 -10   2    8.07    0.30
 -10  10  -2   32.99    0.85
 -10  10  -2   31.69    0.85
 -10  10  -2   30.78    0.67
 -10  10  -2   31.50    0.87
 -10  10  -2   33.59    0.84
  10 -10   2   33.00    0.81
 -11  10  -2   10.53    0.46
 -11  10  -2    9.53    0.48
 -11  10  -2   10.72    0.50
  11 -10   2   10.26    0.43
 -12  10  -2    2.55    0.31
 -12  10  -2    2.25    0.29
 -12  10  -2    2.81    0.29
 -13  10  -2    0.34    0.21
 -13  10  -2    0.22    0.19
 -13  10  -2    0.34    0.19
 -14  10  -2    0.22    0.22
 -14  10  -2   -0.24    0.19
 -14  10  -2    0.02    0.16
 -15  10  -2   -0.16    0.19
 -15  10  -2    0.08    0.17
 -15  10  -2    0.09    0.20
 -16  10  -2    0.42    0.25
 -16  10  -2    0.29    0.19
 -16  10  -2    0.63    0.27
 -15  -9   2    0.49    0.21
 -15  -9   2    0.33    0.24
 -14  -9   2    2.30    0.35
 -14  -9   2    1.89    0.25
 -14  -9   2    1.92    0.25
 -13  -9   2    0.91    0.20
 -13  -9   2    1.44    0.31
 -13  -9   2    1.22    0.21
 -12  -9   2    1.06    0.20
 -12  -9   2    1.34    0.20
 -12  -9   2    1.03    0.27
 -11  -9   2    1.03    0.19
 -11  -9   2    1.15    0.28
 -11  -9   2    1.17    0.18
 -10  -9   2    0.55    0.16
 -10  -9   2    0.47    0.21
 -10  -9   2    0.71    0.14
  -9  -9   2    8.67    0.33
  -9  -9   2    9.09    0.38
  -9  -9   2    8.61    0.21
  -9  -9   2    9.18    0.22
  -9  -9   2    8.69    0.48
   8   9  -2    0.54    0.05
   8   9  -2    0.53    0.05
  -8  -9   2    0.48    0.08
  -8  -9   2    0.45    0.07
  -8  -9   2    0.57    0.13
  -8  -9   2    0.37    0.11
  -8  -9   2    0.40    0.18
   7   9  -2    0.01    0.09
   7   9  -2    0.13    0.06
  -7  -9   2    0.11    0.07
  -7  -9   2   -0.11    0.14
  -7  -9   2    0.09    0.10
  -7  -9   2    0.00    0.06
  -7  -9   2    0.08    0.08
   6   9  -2   13.94    0.33
   6   9  -2   13.77    0.40
  -6  -9   2   14.10    0.38
  -6  -9   2   13.64    0.34
  -6  -9   2   13.76    0.34
  -6  -9   2   13.59    0.36
  -6  -9   2   13.96    0.54
   5   9  -2   42.43    0.91
   5   9  -2   45.48    0.88
  -5  -9   2   43.90    0.85
  -5  -9   2   45.41    1.08
  -5  -9   2   45.96    0.81
  -5  -9   2   45.62    0.85
  -5  -9   2   46.35    0.85
  -5  -9   2   43.55    0.87
   4   9  -2    5.67    0.23
   4   9  -2    5.56    0.21
   4   9  -2    5.60    0.20
  -4  -9   2    5.39    0.33
  -4  -9   2    5.46    0.20
  -4  -9   2    5.56    0.15
  -4  -9   2    5.28    0.22
  -4  -9   2    5.26    0.23
  -4  -9   2    5.53    0.19
   3   9  -2   20.15    0.47
   3   9  -2   19.50    0.42
   3   9  -2   19.57    0.48
  -3  -9   2   18.77    0.47
  -3  -9   2   20.60    0.61
  -3  -9   2   19.82    0.34
  -3  -9   2   20.60    0.43
  -3  -9   2   19.59    0.49
   2   9  -2    0.31    0.07
   2   9  -2    0.20    0.10
  -2  -9   2    0.13    0.09
  -2  -9   2    0.36    0.15
  -2  -9   2    0.39    0.08
  -2  -9   2    0.22    0.10
   1   9  -2   30.24    0.67
   1   9  -2   30.20    0.54
   1   9  -2   30.53    0.66
   1   9  -2   30.43    0.61
  -1  -9   2   29.57    0.66
  -1  -9   2   30.85    0.68
  -1  -9   2   30.12    0.60
  -1  -9   2   29.61    0.73
   0   9  -2   38.77    0.83
   0   9  -2   41.74    0.77
   0   9  -2   39.50    0.90
   0   9  -2   40.13    0.65
   0   9  -2   39.59    0.83
   0   9  -2   38.13    0.65
   0  -9   2   39.23    0.84
   0  -9   2   38.18    0.81
   0  -9   2   39.45    0.76
   0  -9   2   40.96    0.88
  -1   9  -2  192.48    3.21
  -1   9  -2  189.31    3.13
  -1   9  -2  190.06    3.26
  -1   9  -2  187.83    3.21
  -1   9  -2  187.69    3.09
   1  -9   2  189.06    3.15
   1  -9   2  189.46    3.22
   1  -9   2  185.61    3.20
   1  -9   2  191.51    3.23
  -2   9  -2   21.09    0.54
  -2   9  -2   20.26    0.44
  -2   9  -2   21.15    0.55
  -2   9  -2   21.19    0.49
  -2   9  -2   21.46    0.55
   2  -9   2   20.69    0.50
   2  -9   2   20.88    0.53
   2  -9   2   21.51    0.53
   2  -9   2   21.16    0.56
  -3   9  -2    5.19    0.24
  -3   9  -2    5.10    0.21
  -3   9  -2    5.36    0.28
  -3   9  -2    5.07    0.28
  -3   9  -2    4.95    0.25
   3  -9   2    5.30    0.24
   3  -9   2    5.32    0.28
   3  -9   2    5.49    0.27
   3  -9   2    5.39    0.24
  -4   9  -2   13.39    0.43
  -4   9  -2   12.87    0.42
  -4   9  -2   13.14    0.39
  -4   9  -2   13.35    0.37
  -4   9  -2   13.48    0.39
   4  -9   2   13.57    0.41
   4  -9   2   13.27    0.42
   4  -9   2   12.49    0.43
   4  -9   2   12.92    0.36
  -5   9  -2    0.08    0.11
  -5   9  -2    0.04    0.12
  -5   9  -2    0.01    0.12
  -5   9  -2    0.03    0.09
  -5   9  -2   -0.01    0.08
   5  -9   2    0.13    0.10
   5  -9   2   -0.08    0.10
  -6   9  -2    0.13    0.11
  -6   9  -2    0.29    0.12
  -6   9  -2    0.16    0.09
  -6   9  -2    0.14    0.12
  -6   9  -2    0.30    0.14
   6  -9   2    0.09    0.11
   6  -9   2    0.15    0.08
  -7   9  -2    0.07    0.12
  -7   9  -2    0.18    0.09
  -7   9  -2    0.12    0.12
  -7   9  -2    0.14    0.12
  -7   9  -2    0.12    0.13
   7  -9   2   -0.02    0.11
   7  -9   2    0.11    0.08
  -8   9  -2    9.21    0.40
  -8   9  -2    9.22    0.29
  -8   9  -2    9.39    0.39
  -8   9  -2    9.89    0.40
  -8   9  -2    9.78    0.41
   8  -9   2    9.39    0.31
   8  -9   2    9.36    0.38
  -9   9  -2    2.07    0.16
  -9   9  -2    1.75    0.22
  -9   9  -2    2.04    0.22
  -9   9  -2    2.06    0.23
  -9   9  -2    2.72    0.25
   9  -9   2    2.68    0.24
 -10   9  -2    6.86    0.36
 -10   9  -2    6.48    0.36
 -10   9  -2    6.41    0.38
 -10   9  -2    6.34    0.25
 -10   9  -2    6.71    0.38
  10  -9   2    6.71    0.34
 -11   9  -2    9.98    0.47
 -11   9  -2    9.74    0.43
 -11   9  -2    9.73    0.48
  11  -9   2    9.31    0.40
 -12   9  -2    0.71    0.21
 -12   9  -2    1.00    0.25
 -12   9  -2    0.95    0.20
 -13   9  -2    0.08    0.16
 -13   9  -2   -0.11    0.18
 -13   9  -2    0.02    0.19
 -14   9  -2    0.08    0.16
 -14   9  -2   -0.06    0.19
 -14   9  -2   -0.08    0.19
 -15   9  -2    0.22    0.24
 -15   9  -2    0.29    0.17
 -15   9  -2    0.27    0.22
 -16   9  -2    0.95    0.21
 -16   9  -2    0.98    0.28
 -16   9  -2    1.01    0.27
 -15  -8   2    0.08    0.22
 -15  -8   2    0.16    0.18
 -15  -8   2    0.35    0.19
 -14  -8   2    0.43    0.18
 -14  -8   2    0.70    0.20
 -14  -8   2    0.90    0.26
 -13  -8   2    0.06    0.21
 -13  -8   2    0.26    0.16
 -13  -8   2    0.19    0.14
 -12  -8   2    0.79    0.18
 -12  -8   2    0.84    0.19
 -12  -8   2    0.71    0.24
 -11  -8   2   -0.05    0.11
 -11  -8   2    0.04    0.18
 -11  -8   2   -0.02    0.13
 -10  -8   2    0.21    0.12
 -10  -8   2    0.44    0.19
 -10  -8   2    0.39    0.15
  -9  -8   2    0.74    0.13
  -9  -8   2    0.86    0.05
  -9  -8   2    0.87    0.15
  -9  -8   2    0.82    0.06
  -9  -8   2    0.86    0.23
  -8  -8   2    3.44    0.13
  -8  -8   2    3.12    0.21
  -8  -8   2    3.44    0.12
  -8  -8   2    3.08    0.32
  -8  -8   2    3.88    0.23
   7   8  -2    5.56    0.27
   7   8  -2    5.70    0.16
   7   8  -2    5.85    0.15
  -7  -8   2    5.82    0.18
  -7  -8   2    6.03    0.24
  -7  -8   2    5.99    0.37
  -7  -8   2    5.93    0.26
  -7  -8   2    5.74    0.19
   6   8  -2    0.41    0.07
   6   8  -2    0.37    0.11
   6   8  -2    0.51    0.08
  -6  -8   2    0.48    0.11
  -6  -8   2    0.51    0.08
  -6  -8   2    0.45    0.16
  -6  -8   2    0.50    0.09
  -6  -8   2    0.48    0.08
   5   8  -2    0.83    0.10
   5   8  -2    0.94    0.09
   5   8  -2    0.88    0.12
  -5  -8   2    0.93    0.11
  -5  -8   2    0.86    0.10
  -5  -8   2    0.74    0.17
  -5  -8   2    0.78    0.10
  -5  -8   2    0.77    0.08
   4   8  -2    1.30    0.12
   4   8  -2    1.45    0.13
  -4  -8   2    1.02    0.10
  -4  -8   2    1.21    0.09
  -4  -8   2    0.99    0.18
  -4  -8   2    1.33    0.12
  -4  -8   2    1.26    0.12
  -4  -8   2    1.43    0.11
   3   8  -2    7.32    0.22
   3   8  -2    8.03    0.26
   3   8  -2    7.24    0.24
  -3  -8   2    7.54    0.26
  -3  -8   2    7.81    0.23
  -3  -8   2    7.80    0.25
  -3  -8   2    7.19    0.34
  -3  -8   2    7.62    0.16
  -3  -8   2    7.59    0.20
   2   8  -2   29.72    0.55
   2   8  -2   29.35    0.63
   2   8  -2   29.61    0.62
  -2  -8   2   29.08    0.62
  -2  -8   2   31.10    0.58
  -2  -8   2   29.82    0.64
  -2  -8   2   30.14    0.73
   1   8  -2    8.95    0.25
   1   8  -2    8.28    0.20
   1   8  -2    8.12    0.34
   1   8  -2    8.19    0.28
   1   8  -2    8.14    0.28
  -1  -8   2    8.10    0.28
  -1  -8   2    7.70    0.32
  -1  -8   2    8.73    0.24
  -1  -8   2    7.83    0.28
   0   8  -2   11.29    0.34
   0   8  -2   11.43    0.35
   0   8  -2   11.25    0.21
   0   8  -2   11.43    0.30
   0   8  -2   11.25    0.38
   0  -8   2   11.54    0.34
   0  -8   2   11.32    0.29
   0  -8   2   11.29    0.35
   0  -8   2   11.33    0.38
  -1   8  -2   57.17    1.08
  -1   8  -2   56.71    1.02
  -1   8  -2   55.65    1.11
  -1   8  -2   54.88    1.07
  -1   8  -2   54.39    0.95
   1  -8   2   56.10    1.09
   1  -8   2   55.13    1.07
   1  -8   2   57.10    1.03
   1  -8   2   57.20    1.09
  -2   8  -2    0.61    0.12
  -2   8  -2    0.36    0.12
  -2   8  -2    0.69    0.13
  -2   8  -2    0.51    0.08
  -2   8  -2    0.51    0.09
   2  -8   2    0.50    0.09
   2  -8   2    0.52    0.12
   2  -8   2    0.58    0.12
   2  -8   2    0.60    0.12
  -3   8  -2    5.42    0.23
  -3   8  -2    5.55    0.21
  -3   8  -2    5.27    0.27
  -3   8  -2    5.61    0.25
  -3   8  -2    5.39    0.27
   3  -8   2    5.98    0.27
   3  -8   2    5.93    0.23
   3  -8   2    5.60    0.25
   3  -8   2    5.04    0.25
  -4   8  -2    0.09    0.11
  -4   8  -2    0.24    0.10
  -4   8  -2    0.20    0.10
  -4   8  -2    0.19    0.11
  -4   8  -2    0.26    0.09
   4  -8   2    0.33    0.12
   4  -8   2    0.16    0.10
   4  -8   2    0.32    0.10
   4  -8   2    0.10    0.11
  -5   8  -2    9.17    0.34
  -5   8  -2    9.32    0.35
  -5   8  -2    9.92    0.30
  -5   8  -2    9.79    0.33
  -5   8  -2   10.19    0.36
   5  -8   2    9.86    0.30
   5  -8   2    9.63    0.35
   5  -8   2    9.50    0.34
   5  -8   2    9.63    0.36
  -6   8  -2    0.27    0.11
  -6   8  -2    0.25    0.12
  -6   8  -2    0.37    0.13
  -6   8  -2    0.31    0.13
  -6   8  -2    0.31    0.09
   6  -8   2    0.33    0.12
   6  -8   2    0.35    0.09
  -7   8  -2   10.56    0.39
  -7   8  -2   10.21    0.39
  -7   8  -2   11.60    0.42
  -7   8  -2   11.21    0.40
  -7   8  -2   11.03    0.31
   7  -8   2   10.68    0.38
   7  -8   2   10.71    0.32
  -8   8  -2   22.19    0.50
  -8   8  -2   22.90    0.61
  -8   8  -2   21.88    0.64
  -8   8  -2   21.58    0.60
  -8   8  -2   22.52    0.63
   8  -8   2   22.32    0.54
   8  -8   2   22.91    0.59
  -9   8  -2    0.34    0.14
  -9   8  -2    0.14    0.09
  -9   8  -2    0.31    0.15
  -9   8  -2    0.58    0.16
  -9   8  -2    0.41    0.14
   9  -8   2    0.43    0.13
 -10   8  -2    2.76    0.26
 -10   8  -2    2.33    0.26
 -10   8  -2    2.43    0.24
 -10   8  -2    1.96    0.17
 -10   8  -2    1.95    0.24
  10  -8   2    2.13    0.21
 -11   8  -2    7.13    0.37
 -11   8  -2    6.97    0.35
 -11   8  -2    5.86    0.26
 -11   8  -2    6.35    0.39
 -11   8  -2    6.94    0.40
  11  -8   2    6.42    0.33
 -12   8  -2    0.27    0.18
 -12   8  -2    0.11    0.14
 -12   8  -2    0.25    0.18
 -13   8  -2    0.25    0.22
 -13   8  -2    0.30    0.16
 -13   8  -2    0.22    0.19
 -14   8  -2   -0.11    0.18
 -14   8  -2   -0.03    0.19
 -14   8  -2    0.29    0.16
 -15   8  -2    1.18    0.20
 -15   8  -2    1.03    0.26
 -15   8  -2    0.77    0.27
 -16   8  -2    0.20    0.15
 -16   8  -2    0.05    0.22
 -16   8  -2   -0.28    0.19
 -16  -7   2    0.00    0.18
 -16  -7   2   -0.14    0.19
 -16  -7   2   -0.03    0.16
 -15  -7   2    0.18    0.22
 -15  -7   2    0.26    0.18
 -15  -7   2    0.04    0.17
 -14  -7   2    0.87    0.21
 -14  -7   2    0.83    0.21
 -14  -7   2    1.17    0.27
 -13  -7   2    7.31    0.41
 -13  -7   2    7.17    0.37
 -13  -7   2    6.94    0.48
 -12  -7   2    0.14    0.14
 -12  -7   2   -0.04    0.13
 -12  -7   2    0.41    0.18
 -11  -7   2    1.88    0.21
 -11  -7   2    1.96    0.23
 -11  -7   2    2.25    0.28
 -10  -7   2   -0.06    0.16
 -10  -7   2    0.00    0.11
 -10  -7   2   -0.09    0.11
  -9  -7   2    0.51    0.17
  -9  -7   2    0.61    0.13
  -9  -7   2    0.54    0.13
   8   7  -2    0.48    0.13
  -8  -7   2    0.47    0.12
  -8  -7   2    0.50    0.05
  -8  -7   2    0.35    0.11
  -8  -7   2    0.29    0.16
  -8  -7   2    0.42    0.05
  -8  -7   2    0.44    0.11
   7   7  -2    7.28    0.15
   7   7  -2    7.15    0.15
   7   7  -2    7.29    0.29
  -7  -7   2    6.91    0.28
  -7  -7   2    7.50    0.40
  -7  -7   2    7.18    0.26
  -7  -7   2    7.23    0.19
  -7  -7   2    7.27    0.18
   6   7  -2    1.79    0.09
   6   7  -2    1.89    0.10
   6   7  -2    1.98    0.17
  -6  -7   2    1.93    0.12
  -6  -7   2    1.86    0.23
  -6  -7   2    1.86    0.11
  -6  -7   2    1.87    0.15
  -6  -7   2    2.14    0.16
   5   7  -2    4.59    0.16
   5   7  -2    4.24    0.15
   5   7  -2    4.62    0.22
  -5  -7   2    4.41    0.29
  -5  -7   2    4.73    0.20
  -5  -7   2    4.46    0.17
  -5  -7   2    4.65    0.16
  -5  -7   2    4.67    0.17
   4   7  -2    5.02    0.20
   4   7  -2    5.05    0.19
  -4  -7   2    5.55    0.19
  -4  -7   2    5.19    0.19
  -4  -7   2    5.64    0.30
  -4  -7   2    5.18    0.18
  -4  -7   2    5.13    0.16
   3   7  -2    1.25    0.11
   3   7  -2    1.46    0.12
  -3  -7   2    1.19    0.17
  -3  -7   2    1.23    0.11
  -3  -7   2    1.09    0.10
  -3  -7   2    1.30    0.10
  -3  -7   2    1.37    0.12
  -3  -7   2    1.19    0.07
   2   7  -2   11.98    0.32
   2   7  -2   12.06    0.31
   2   7  -2   12.18    0.27
  -2  -7   2   12.50    0.40
  -2  -7   2   11.80    0.32
  -2  -7   2   11.55    0.31
  -2  -7   2   12.96    0.29
   1   7  -2   13.71    0.28
   1   7  -2   13.89    0.35
   1   7  -2   13.86    0.42
   1   7  -2   13.99    0.36
   1   7  -2   13.94    0.32
  -1  -7   2   13.29    0.35
  -1  -7   2   14.13    0.36
  -1  -7   2   13.96    0.31
  -1  -7   2   13.98    0.41
   0   7  -2   28.28    0.55
   0   7  -2   27.83    0.59
   0   7  -2   28.17    0.47
   0   7  -2   26.76    0.59
   0   7  -2   27.64    0.63
   0  -7   2   27.34    0.58
   0  -7   2   27.80    0.54
   0  -7   2   26.55    0.61
   0  -7   2   28.65    0.60
  -1   7  -2    0.16    0.05
  -1   7  -2    0.06    0.09
  -1   7  -2    0.14    0.07
  -1   7  -2    0.21    0.09
  -1   7  -2    0.26    0.09
   1  -7   2    0.22    0.10
   1  -7   2    0.09    0.06
   1  -7   2    0.17    0.09
   1  -7   2    0.23    0.09
  -2   7  -2   26.95    0.54
  -2   7  -2   28.90    0.62
  -2   7  -2   27.96    0.58
  -2   7  -2   28.49    0.61
  -2   7  -2   27.64    0.61
   2  -7   2   27.76    0.59
   2  -7   2   27.55    0.61
   2  -7   2   28.50    0.62
   2  -7   2   28.13    0.59
  -3   7  -2   45.82    0.92
  -3   7  -2   46.95    0.89
  -3   7  -2   46.17    0.87
  -3   7  -2   45.73    0.89
  -3   7  -2   45.67    0.92
   3  -7   2   46.25    0.93
   3  -7   2   47.44    0.92
   3  -7   2   46.56    0.91
   3  -7   2   46.55    0.87
  -4   7  -2    1.77    0.14
  -4   7  -2    1.44    0.16
  -4   7  -2    1.40    0.14
  -4   7  -2    1.56    0.14
  -4   7  -2    1.73    0.17
   4  -7   2    1.64    0.16
   4  -7   2    1.54    0.15
   4  -7   2    1.72    0.17
   4  -7   2    1.39    0.15
  -5   7  -2   21.94    0.56
  -5   7  -2   23.14    0.50
  -5   7  -2   22.66    0.55
  -5   7  -2   22.46    0.56
  -5   7  -2   22.90    0.56
   5  -7   2   23.46    0.56
   5  -7   2   22.84    0.58
   5  -7   2   23.24    0.57
   5  -7   2   23.39    0.50
  -6   7  -2    0.44    0.13
  -6   7  -2    0.33    0.12
  -6   7  -2    0.36    0.12
  -6   7  -2    0.41    0.13
  -6   7  -2    0.36    0.09
   6  -7   2    0.38    0.09
   6  -7   2    0.38    0.11
  -7   7  -2    0.02    0.10
  -7   7  -2    0.07    0.11
  -7   7  -2    0.15    0.12
  -7   7  -2    0.06    0.08
  -7   7  -2    0.00    0.10
   7  -7   2    0.01    0.10
   7  -7   2    0.11    0.08
  -8   7  -2   11.96    0.33
  -8   7  -2   11.91    0.44
  -8   7  -2   11.87    0.40
  -8   7  -2   12.09    0.45
  -8   7  -2   12.90    0.42
   8  -7   2   12.09    0.39
  -9   7  -2    4.53    0.30
  -9   7  -2    4.53    0.30
  -9   7  -2    4.67    0.28
  -9   7  -2    4.60    0.22
  -9   7  -2    4.30    0.27
   9  -7   2    4.88    0.26
 -10   7  -2    0.77    0.15
 -10   7  -2    0.98    0.17
 -10   7  -2    0.74    0.17
 -10   7  -2    0.85    0.18
 -10   7  -2    0.82    0.13
  10  -7   2    1.06    0.16
 -11   7  -2    1.45    0.16
 -11   7  -2    1.55    0.24
 -11   7  -2    1.98    0.22
 -11   7  -2    1.45    0.23
 -11   7  -2    1.84    0.21
  11  -7   2    1.47    0.18
 -12   7  -2    0.03    0.19
 -12   7  -2    0.24    0.14
 -12   7  -2    0.04    0.17
 -13   7  -2    0.07    0.19
 -13   7  -2    0.09    0.13
 -13   7  -2   -0.09    0.19
 -14   7  -2    0.57    0.22
 -14   7  -2    0.30    0.20
 -14   7  -2    0.39    0.16
 -15   7  -2    0.65    0.24
 -15   7  -2    1.28    0.29
 -15   7  -2    0.94    0.18
 -16   7  -2    1.16    0.28
 -16   7  -2    1.18    0.20
 -16   7  -2    1.21    0.28
 -16  -6   2    2.05    0.30
 -16  -6   2    1.89    0.32
 -16  -6   2    2.13    0.29
 -15  -6   2    0.09    0.16
 -15  -6   2    0.01    0.20
 -15  -6   2    0.15    0.17
 -14  -6   2    0.49    0.18
 -14  -6   2    0.45    0.19
 -14  -6   2    0.08    0.19
 -13  -6   2    7.13    0.39
 -13  -6   2    7.67    0.47
 -13  -6   2    7.25    0.40
 -12  -6   2    0.42    0.16
 -12  -6   2    0.54    0.18
 -12  -6   2    0.33    0.14
 -11  -6   2    3.95    0.30
 -11  -6   2    3.93    0.27
 -11  -6   2    3.85    0.32
 -10  -6   2    1.63    0.19
 -10  -6   2    1.82    0.20
 -10  -6   2    1.78    0.25
  -9  -6   2    2.57    0.26
  -9  -6   2    2.41    0.21
  -9  -6   2    2.52    0.23
   8   6  -2    0.73    0.16
  -8  -6   2    0.73    0.17
  -8  -6   2    0.79    0.13
  -8  -6   2    0.75    0.13
  -8  -6   2    0.87    0.15
   7   6  -2   39.68    0.86
  -7  -6   2   40.79    0.85
  -7  -6   2   41.12    0.69
  -7  -6   2   40.32    0.96
  -7  -6   2   41.33    0.83
  -7  -6   2   41.28    0.70
   6   6  -2    0.48    0.12
   6   6  -2    0.58    0.05
   6   6  -2    0.51    0.05
  -6  -6   2    0.54    0.10
  -6  -6   2    0.63    0.06
  -6  -6   2    0.48    0.14
  -6  -6   2    0.51    0.06
  -6  -6   2    0.40    0.11
   5   6  -2    9.89    0.31
   5   6  -2    9.99    0.22
   5   6  -2    9.82    0.23
  -5  -6   2    9.95    0.29
  -5  -6   2   10.29    0.39
  -5  -6   2    9.97    0.23
  -5  -6   2    9.99    0.25
  -5  -6   2   10.13    0.27
   4   6  -2    3.25    0.12
   4   6  -2    3.15    0.13
   4   6  -2    3.07    0.16
  -4  -6   2    3.14    0.13
  -4  -6   2    3.02    0.22
  -4  -6   2    3.20    0.15
  -4  -6   2    3.20    0.14
  -4  -6   2    3.38    0.14
   3   6  -2   23.15    0.46
   3   6  -2   22.11    0.46
   3   6  -2   23.02    0.47
  -3  -6   2   23.77    0.47
  -3  -6   2   22.64    0.58
  -3  -6   2   23.59    0.48
  -3  -6   2   23.61    0.46
  -3  -6   2   23.25    0.46
  -3  -6   2   23.77    0.42
   2   6  -2    1.01    0.09
   2   6  -2    1.12    0.15
   2   6  -2    1.02    0.10
   2   6  -2    1.07    0.09
  -2  -6   2    1.01    0.10
  -2  -6   2    1.04    0.10
  -2  -6   2    1.12    0.04
  -2  -6   2    1.12    0.14
  -2  -6   2    1.26    0.10
   1   6  -2   24.26    0.51
   1   6  -2   25.32    0.49
   1   6  -2   25.16    0.58
   1   6  -2   24.45    0.45
   1   6  -2   24.64    0.51
  -1  -6   2   26.20    0.49
  -1  -6   2   24.59    0.52
  -1  -6   2   24.96    0.57
  -1  -6   2   24.57    0.51
   0   6  -2   59.25    0.97
   0   6  -2   60.00    1.07
   0   6  -2   61.28    1.12
   0   6  -2   58.59    1.07
   0   6  -2   58.91    1.04
   0  -6   2   58.52    1.07
   0  -6   2   58.50    1.08
   0  -6   2   60.25    1.04
   0  -6   2   58.96    1.10
  -1   6  -2   52.69    0.98
  -1   6  -2   51.30    0.90
  -1   6  -2   51.87    0.98
  -1   6  -2   54.30    1.00
  -1   6  -2   53.64    0.95
   1  -6   2   53.37    0.99
   1  -6   2   53.90    0.98
   1  -6   2   52.03    0.97
   1  -6   2   52.97    0.95
  -2   6  -2    9.32    0.27
  -2   6  -2    9.66    0.29
  -2   6  -2    9.92    0.30
  -2   6  -2    9.67    0.28
  -2   6  -2    9.45    0.25
   2  -6   2    9.46    0.29
   2  -6   2   10.34    0.29
   2  -6   2    9.73    0.29
   2  -6   2    9.53    0.27
  -3   6  -2    0.79    0.10
  -3   6  -2    0.65    0.11
  -3   6  -2    0.44    0.09
  -3   6  -2    0.77    0.10
  -3   6  -2    0.87    0.12
   3  -6   2    0.84    0.11
   3  -6   2    0.83    0.10
   3  -6   2    0.72    0.10
   3  -6   2    0.80    0.12
  -4   6  -2   15.96    0.37
  -4   6  -2   15.79    0.42
  -4   6  -2   16.47    0.42
  -4   6  -2   16.63    0.43
  -4   6  -2   15.90    0.42
   4  -6   2   15.99    0.41
   4  -6   2   16.40    0.43
   4  -6   2   15.88    0.38
   4  -6   2   16.84    0.44
  -5   6  -2   22.76    0.54
  -5   6  -2   23.26    0.54
  -5   6  -2   22.02    0.54
  -5   6  -2   22.50    0.55
  -5   6  -2   22.48    0.48
   5  -6   2   22.39    0.49
   5  -6   2   21.94    0.54
   5  -6   2   23.19    0.53
   5  -6   2   21.83    0.56
  -6   6  -2    6.68    0.28
  -6   6  -2    7.38    0.24
  -6   6  -2    7.21    0.30
  -6   6  -2    7.17    0.31
  -6   6  -2    6.84    0.28
   6  -6   2    7.22    0.28
   6  -6   2    6.96    0.25
   6  -6   2    7.49    0.32
   6  -6   2    6.95    0.28
  -7   6  -2    2.97    0.23
  -7   6  -2    2.93    0.17
  -7   6  -2    2.91    0.21
  -7   6  -2    2.94    0.23
  -7   6  -2    3.08    0.21
   7  -6   2    2.65    0.19
  -8   6  -2   37.54    0.74
  -8   6  -2   38.19    0.82
  -8   6  -2   35.70    0.80
  -8   6  -2   38.63    0.89
  -8   6  -2   37.71    0.88
   8  -6   2   37.33    0.79
  -9   6  -2    0.52    0.15
  -9   6  -2    0.44    0.16
  -9   6  -2    0.77    0.15
  -9   6  -2    0.53    0.11
  -9   6  -2    0.36    0.12
   9  -6   2    0.60    0.13
 -10   6  -2    0.15    0.09
 -10   6  -2    0.14    0.12
 -10   6  -2   -0.08    0.13
 -10   6  -2   -0.01    0.14
 -10   6  -2    0.02    0.11
  10  -6   2    0.12    0.10
 -11   6  -2    0.41    0.11
 -11   6  -2    0.44    0.18
 -11   6  -2    0.25    0.13
 -11   6  -2    0.19    0.16
 -11   6  -2    0.44    0.14
  11  -6   2    0.33    0.11
 -12   6  -2    0.06    0.12
 -12   6  -2    0.08    0.16
 -12   6  -2    0.04    0.16
 -13   6  -2    0.77    0.16
 -13   6  -2    0.91    0.23
 -13   6  -2    0.53    0.21
 -14   6  -2    0.79    0.16
 -14   6  -2    0.82    0.23
 -14   6  -2    0.90    0.27
 -15   6  -2    0.28    0.21
 -15   6  -2    0.21    0.14
 -15   6  -2   -0.16    0.18
 -16   6  -2    0.16    0.23
 -16   6  -2    0.56    0.16
 -16   6  -2    0.43    0.24
 -17  -5   2    1.74    0.31
 -17  -5   2    1.05    0.26
 -17  -5   2    1.78    0.29
 -16  -5   2    0.10    0.19
 -16  -5   2    0.21    0.20
 -16  -5   2    0.25    0.19
 -15  -5   2    2.53    0.29
 -15  -5   2    2.55    0.32
 -15  -5   2    2.92    0.31
 -14  -5   2    3.52    0.32
 -14  -5   2    3.00    0.31
 -14  -5   2    3.07    0.34
 -13  -5   2    1.86    0.28
 -13  -5   2    1.74    0.23
 -13  -5   2    1.75    0.24
 -12  -5   2    1.41    0.21
 -12  -5   2    1.17    0.22
 -12  -5   2    1.26    0.20
 -11  -5   2    7.40    0.38
 -11  -5   2    7.04    0.35
 -11  -5   2    7.35    0.40
 -10  -5   2    4.21    0.30
 -10  -5   2    4.39    0.27
 -10  -5   2    4.69    0.30
  -9  -5   2    0.64    0.17
  -9  -5   2    0.53    0.14
  -9  -5   2    0.72    0.14
   8   5  -2    9.61    0.37
  -8  -5   2    9.32    0.34
  -8  -5   2    9.12    0.35
  -8  -5   2    9.65    0.35
  -8  -5   2    8.93    0.40
   7   5  -2   20.83    0.53
  -7  -5   2   20.05    0.50
  -7  -5   2   20.97    0.60
  -7  -5   2   20.21    0.51
   6   5  -2    0.01    0.09
  -6  -5   2    0.13    0.09
  -6  -5   2    0.14    0.03
  -6  -5   2    0.09    0.04
  -6  -5   2    0.08    0.08
  -6  -5   2    0.09    0.11
   5   5  -2    3.89    0.20
   5   5  -2    3.60    0.11
   5   5  -2    3.74    0.10
  -5  -5   2    3.70    0.24
  -5  -5   2    3.60    0.18
  -5  -5   2    3.60    0.12
  -5  -5   2    3.55    0.16
  -5  -5   2    3.66    0.11
   4   5  -2    0.49    0.06
   4   5  -2    0.60    0.06
   4   5  -2    0.54    0.09
  -4  -5   2    0.58    0.09
  -4  -5   2    0.52    0.06
  -4  -5   2    0.50    0.06
  -4  -5   2    0.56    0.07
  -4  -5   2    0.39    0.11
   3   5  -2   25.72    0.49
   3   5  -2   25.16    0.50
  -3  -5   2   25.99    0.60
  -3  -5   2   26.07    0.48
  -3  -5   2   26.09    0.49
  -3  -5   2   25.11    0.49
  -3  -5   2   25.50    0.47
   2   5  -2   33.84    0.72
   2   5  -2   34.61    0.61
   2   5  -2   33.27    0.62
   2   5  -2   33.42    0.63
  -2  -5   2   34.46    0.62
  -2  -5   2   34.64    0.60
  -2  -5   2   33.70    0.63
  -2  -5   2   33.67    0.62
  -2  -5   2   33.76    0.71
   1   5  -2  132.14    2.25
   1   5  -2  135.53    2.32
   1   5  -2  139.35    2.37
   1   5  -2  132.10    2.40
   1   5  -2  140.53    2.29
  -1  -5   2  137.38    2.23
  -1  -5   2  133.60    2.31
  -1  -5   2  134.87    2.35
  -1  -5   2  138.93    2.26
   0   5  -2   -0.02    0.07
   0   5  -2    0.04    0.03
   0   5  -2   -0.02    0.07
   0   5  -2    0.15    0.07
   0   5  -2   -0.10    0.06
   0  -5   2    0.04    0.08
   0  -5   2    0.00    0.06
   0  -5   2    0.04    0.07
   0  -5   2    0.06    0.06
  -1   5  -2    0.47    0.09
  -1   5  -2    0.28    0.05
  -1   5  -2    0.31    0.08
  -1   5  -2    0.37    0.08
  -1   5  -2    0.39    0.09
   1  -5   2    0.32    0.06
   1  -5   2    0.41    0.08
   1  -5   2    0.29    0.08
   1  -5   2    0.25    0.08
  -2   5  -2    8.76    0.24
  -2   5  -2    8.29    0.23
  -2   5  -2    8.56    0.25
  -2   5  -2    8.85    0.26
  -2   5  -2    8.56    0.26
   2  -5   2    8.49    0.24
   2  -5   2    8.68    0.26
   2  -5   2    8.62    0.26
   2  -5   2    9.02    0.26
  -3   5  -2    0.77    0.10
  -3   5  -2    0.81    0.09
  -3   5  -2    0.67    0.09
  -3   5  -2    0.76    0.10
  -3   5  -2    0.74    0.11
   3  -5   2    0.69    0.10
   3  -5   2    0.72    0.09
   3  -5   2    0.77    0.11
   3  -5   2    0.72    0.10
  -4   5  -2   15.35    0.39
  -4   5  -2   16.48    0.36
  -4   5  -2   14.41    0.40
  -4   5  -2   15.01    0.39
  -4   5  -2   14.99    0.39
   4  -5   2   15.11    0.39
   4  -5   2   14.77    0.36
   4  -5   2   15.97    0.39
   4  -5   2   15.46    0.41
  -5   5  -2    3.43    0.21
  -5   5  -2    3.52    0.21
  -5   5  -2    3.61    0.20
  -5   5  -2    3.83    0.21
  -5   5  -2    3.81    0.17
   5  -5   2    3.49    0.19
   5  -5   2    3.65    0.18
   5  -5   2    3.56    0.19
   5  -5   2    3.71    0.22
  -6   5  -2    4.64    0.25
  -6   5  -2    4.58    0.23
  -6   5  -2    4.06    0.22
  -6   5  -2    4.69    0.20
  -6   5  -2    4.76    0.26
   6  -5   2    4.79    0.26
   6  -5   2    4.40    0.21
   6  -5   2    4.60    0.22
   6  -5   2    4.37    0.21
  -7   5  -2    7.18    0.28
  -7   5  -2    7.25    0.32
  -7   5  -2    7.50    0.25
  -7   5  -2    7.25    0.32
  -7   5  -2    6.95    0.28
   7  -5   2    7.30    0.27
  -8   5  -2    8.89    0.28
  -8   5  -2    8.53    0.37
  -8   5  -2    8.74    0.37
  -8   5  -2    8.88    0.32
  -8   5  -2    8.98    0.32
   8  -5   2    8.70    0.30
  -9   5  -2    0.23    0.13
  -9   5  -2    0.55    0.13
  -9   5  -2    0.51    0.10
  -9   5  -2    0.39    0.15
  -9   5  -2    0.42    0.12
   9  -5   2    0.54    0.11
 -10   5  -2    6.96    0.30
 -10   5  -2    7.46    0.31
 -10   5  -2    6.59    0.36
 -10   5  -2    7.56    0.28
 -10   5  -2    6.83    0.37
  10  -5   2    7.08    0.28
 -11   5  -2    0.33    0.10
 -11   5  -2    0.14    0.16
 -11   5  -2   -0.10    0.14
 -11   5  -2    0.05    0.11
 -11   5  -2    0.05    0.11
  11  -5   2    0.16    0.10
 -12   5  -2    1.12    0.15
 -12   5  -2    0.95    0.16
 -12   5  -2    0.41    0.19
 -12   5  -2    0.60    0.19
 -13   5  -2    1.96    0.28
 -13   5  -2    2.01    0.20
 -13   5  -2    2.04    0.29
 -14   5  -2    3.05    0.36
 -14   5  -2    2.90    0.34
 -14   5  -2    2.47    0.22
 -15   5  -2    0.33    0.14
 -15   5  -2    0.42    0.22
 -15   5  -2    0.37    0.22
 -16   5  -2    0.88    0.26
 -16   5  -2    0.66    0.15
 -16   5  -2    0.29    0.23
 -17  -4   2    0.50    0.23
 -17  -4   2    0.33    0.27
 -17  -4   2   -0.02    0.20
 -16  -4   2    0.76    0.24
 -16  -4   2    0.75    0.23
 -16  -4   2    0.53    0.22
 -15  -4   2    8.82    0.50
 -15  -4   2    8.77    0.49
 -15  -4   2    8.19    0.46
 -14  -4   2    0.73    0.20
 -14  -4   2    0.71    0.20
 -14  -4   2    0.61    0.21
 -13  -4   2    0.19    0.15
 -13  -4   2    0.24    0.16
 -13  -4   2    0.36    0.19
 -12  -4   2    1.32    0.21
 -12  -4   2    1.32    0.23
 -12  -4   2    1.44    0.21
 -11  -4   2    0.15    0.14
 -11  -4   2    0.12    0.13
 -11  -4   2    0.07    0.13
 -10  -4   2   13.74    0.47
 -10  -4   2   13.58    0.50
 -10  -4   2   13.39    0.48
  -9  -4   2   30.98    0.76
  -9  -4   2   30.24    0.79
  -9  -4   2   31.12    0.73
   8   4  -2   43.68    0.96
  -8  -4   2   45.83    0.95
  -8  -4   2   45.99    1.02
  -8  -4   2   46.44    0.96
  -8  -4   2   46.04    0.98
   7   4  -2   11.37    0.38
  -7  -4   2   11.15    0.37
  -7  -4   2   11.08    0.36
  -7  -4   2   11.59    0.36
  -7  -4   2   12.02    0.41
   6   4  -2    1.52    0.16
  -6  -4   2    1.57    0.18
  -6  -4   2    1.53    0.14
  -6  -4   2    1.94    0.17
   5   4  -2    0.96    0.13
  -5  -4   2    0.93    0.05
  -5  -4   2    0.96    0.14
  -5  -4   2    1.15    0.12
  -5  -4   2    0.85    0.05
   4   4  -2    3.45    0.09
   4   4  -2    3.26    0.16
  -4  -4   2    3.27    0.20
  -4  -4   2    3.56    0.11
  -4  -4   2    3.49    0.15
  -4  -4   2    3.38    0.10
   3   4  -2   16.62    0.43
   3   4  -2   15.86    0.31
   3   4  -2   16.17    0.35
  -3  -4   2   16.48    0.32
  -3  -4   2   16.41    0.35
  -3  -4   2   15.72    0.41
  -3  -4   2   16.14    0.31
   2   4  -2  180.31    2.97
   2   4  -2  155.08    2.81
   2   4  -2  170.26    2.86
   2   4  -2  173.43    2.94
  -2  -4   2  172.14    4.42
  -2  -4   2  184.45    3.04
  -2  -4   2  173.84    3.05
  -2  -4   2  175.20    2.90
  -2  -4   2  156.34    2.87
   1   4  -2   98.15    1.61
   1   4  -2   96.34    1.68
   1   4  -2   98.13    1.78
   1   4  -2   97.82    1.63
   1   4  -2  100.19    1.63
  -1  -4   2   98.29    1.63
  -1  -4   2  104.81    1.64
  -1  -4   2   94.89    1.67
  -1  -4   2   93.81    2.49
  -1  -4   2   97.58    1.78
   0   4  -2  100.66    1.69
   0   4  -2  102.51    1.76
   0   4  -2   98.45    1.67
   0   4  -2  100.19    1.67
   0   4  -2  100.90    1.71
   0  -4   2   97.22    1.68
   0  -4   2   96.49    1.67
   0  -4   2   98.98    1.67
   0  -4   2  104.27    1.69
   0  -4   2  100.53    1.82
  -1   4  -2   24.20    0.49
  -1   4  -2   22.99    0.47
  -1   4  -2   24.03    0.45
  -1   4  -2   23.75    0.48
  -1   4  -2   23.93    0.47
   1  -4   2   24.41    0.45
   1  -4   2   24.06    0.48
   1  -4   2   24.33    0.49
   1  -4   2   23.33    0.48
   1  -4   2   24.85    0.48
  -2   4  -2    0.31    0.08
  -2   4  -2    0.33    0.08
  -2   4  -2    0.32    0.07
  -2   4  -2    0.21    0.08
  -2   4  -2    0.23    0.07
   2  -4   2    0.27    0.08
   2  -4   2    0.34    0.08
   2  -4   2    0.24    0.07
   2  -4   2    0.27    0.07
   2  -4   2    0.24    0.07
  -3   4  -2   17.34    0.40
  -3   4  -2   17.81    0.40
  -3   4  -2   17.87    0.40
  -3   4  -2   18.17    0.38
  -3   4  -2   17.97    0.41
   3  -4   2   17.42    0.39
   3  -4   2   17.35    0.38
   3  -4   2   17.80    0.42
   3  -4   2   17.19    0.40
  -4   4  -2    2.00    0.15
  -4   4  -2    1.81    0.14
  -4   4  -2    1.87    0.14
  -4   4  -2    2.06    0.13
  -4   4  -2    1.80    0.16
   4  -4   2    1.85    0.13
   4  -4   2    1.79    0.13
   4  -4   2    1.80    0.14
   4  -4   2    1.82    0.15
  -5   4  -2   11.39    0.30
  -5   4  -2   11.26    0.35
  -5   4  -2   11.05    0.35
  -5   4  -2   11.56    0.32
  -5   4  -2   11.17    0.32
   5  -4   2   11.24    0.32
   5  -4   2   11.66    0.36
   5  -4   2   11.24    0.31
   5  -4   2   11.24    0.32
  -6   4  -2  131.75    2.29
  -6   4  -2  135.72    2.28
  -6   4  -2  138.22    2.30
  -6   4  -2  137.43    2.38
  -6   4  -2  132.86    2.36
   6  -4   2  136.44    2.39
   6  -4   2  134.58    2.30
   6  -4   2  133.18    2.28
  -7   4  -2   12.92    0.37
  -7   4  -2   13.71    0.37
  -7   4  -2   14.18    0.44
  -7   4  -2   13.14    0.37
  -7   4  -2   13.94    0.44
   7  -4   2   13.65    0.36
   7  -4   2   13.40    0.38
  -8   4  -2    0.06    0.12
  -8   4  -2    0.31    0.09
  -8   4  -2    0.16    0.09
  -8   4  -2    0.22    0.10
  -8   4  -2    0.21    0.13
   8  -4   2    0.32    0.09
  -9   4  -2   26.96    0.62
  -9   4  -2   27.60    0.72
  -9   4  -2   26.81    0.61
  -9   4  -2   26.71    0.72
  -9   4  -2   28.28    0.63
   9  -4   2   27.44    0.60
 -10   4  -2    3.12    0.28
 -10   4  -2    3.25    0.21
 -10   4  -2    3.03    0.27
 -10   4  -2    3.40    0.22
 -10   4  -2    3.48    0.21
  10  -4   2    3.04    0.19
 -11   4  -2    0.51    0.12
 -11   4  -2    0.43    0.12
 -11   4  -2    0.34    0.18
 -11   4  -2    0.55    0.19
 -11   4  -2    0.50    0.12
  11  -4   2    0.50    0.11
 -12   4  -2    1.12    0.15
 -12   4  -2    0.81    0.23
 -12   4  -2    0.66    0.19
 -12   4  -2    0.71    0.13
 -13   4  -2    8.95    0.34
 -13   4  -2    7.67    0.45
 -13   4  -2    7.99    0.46
 -14   4  -2    2.88    0.33
 -14   4  -2    3.35    0.24
 -14   4  -2    3.41    0.33
 -15   4  -2    0.08    0.19
 -15   4  -2    0.17    0.12
 -15   4  -2   -0.02    0.21
 -16   4  -2    0.77    0.26
 -16   4  -2    0.48    0.24
 -16   4  -2    0.36    0.13
 -17  -3   2    0.06    0.18
 -17  -3   2    0.37    0.22
 -16  -3   2    0.03    0.19
 -16  -3   2    0.04    0.17
 -16  -3   2    0.06    0.18
 -15  -3   2    0.13    0.18
 -15  -3   2    0.03    0.16
 -15  -3   2    0.12    0.17
 -14  -3   2    1.95    0.27
 -14  -3   2    1.89    0.28
 -14  -3   2    1.64    0.25
 -13  -3   2    1.03    0.20
 -13  -3   2    1.12    0.21
 -13  -3   2    1.58    0.24
 -12  -3   2    9.85    0.43
 -12  -3   2    9.28    0.44
 -12  -3   2    9.46    0.45
 -11  -3   2    3.55    0.28
 -11  -3   2    3.48    0.29
 -11  -3   2    3.72    0.29
 -10  -3   2    6.30    0.33
 -10  -3   2    7.23    0.33
 -10  -3   2    7.71    0.36
   9   3  -2    1.00    0.18
  -9  -3   2    1.01    0.16
  -9  -3   2    0.75    0.15
  -9  -3   2    0.90    0.16
   8   3  -2    8.01    0.33
  -8  -3   2    7.30    0.32
  -8  -3   2    7.40    0.34
  -8  -3   2    7.59    0.33
  -8  -3   2    7.54    0.31
   7   3  -2    0.17    0.11
  -7  -3   2    0.35    0.10
  -7  -3   2    0.43    0.12
  -7  -3   2    0.48    0.12
   6   3  -2    1.70    0.16
  -6  -3   2    1.96    0.17
  -6  -3   2    1.44    0.16
   5   3  -2    6.68    0.24
  -5  -3   2    7.13    0.27
  -5  -3   2    6.82    0.23
   4   3  -2    0.36    0.09
   4   3  -2    0.38    0.03
   4   3  -2    0.39    0.03
  -4  -3   2    0.44    0.08
  -4  -3   2    0.44    0.10
  -4  -3   2    0.48    0.04
  -4  -3   2    0.48    0.04
   3   3  -2    7.22    0.15
   3   3  -2    7.38    0.16
   3   3  -2    7.02    0.21
   3   3  -2    6.97    0.24
  -3  -3   2    7.26    0.16
  -3  -3   2    7.20    0.24
  -3  -3   2    7.25    0.21
  -3  -3   2    7.13    0.15
   2   3  -2    6.38    0.21
   2   3  -2    6.21    0.17
   2   3  -2    6.23    0.15
  -2  -3   2    6.33    0.22
  -2  -3   2    6.26    0.15
  -2  -3   2    6.35    0.16
  -2  -3   2    6.43    0.16
   1   3  -2    0.20    0.03
   1   3  -2    0.34    0.05
   1   3  -2    0.22    0.07
   1   3  -2    0.31    0.06
   1   3  -2    0.28    0.05
  -1  -3   2    0.30    0.03
  -1  -3   2    0.32    0.07
  -1  -3   2    0.32    0.06
  -1  -3   2    0.29    0.05
  -1  -3   2    0.30    0.05
   0   3  -2   21.88    0.43
   0   3  -2   21.54    0.41
   0   3  -2   22.05    0.38
   0   3  -2   21.26    0.41
   0   3  -2   21.77    0.41
   0  -3   2   21.61    0.42
   0  -3   2   21.21    0.41
   0  -3   2   21.91    0.41
   0  -3   2   21.29    0.38
   0  -3   2   21.57    0.42
  -1   3  -2   86.34    1.58
  -1   3  -2   88.65    1.48
  -1   3  -2   87.37    1.46
  -1   3  -2   87.15    1.48
  -1   3  -2   91.87    1.56
   1  -3   2   89.16    1.47
   1  -3   2   91.50    1.57
   1  -3   2   85.77    1.48
   1  -3   2   87.98    1.48
   1  -3   2   89.65    1.48
  -2   3  -2  343.16    5.81
  -2   3  -2  334.15    5.71
  -2   3  -2  328.53    5.86
  -2   3  -2  327.39    5.92
  -2   3  -2  342.83    8.55
   2  -3   2  343.83    5.89
   2  -3   2  339.67    5.96
   2  -3   2  347.12    5.74
   2  -3   2  337.77    5.71
   2  -3   2  340.53    5.89
  -3   3  -2   39.79    0.74
  -3   3  -2   39.46    0.76
  -3   3  -2   40.33    0.76
  -3   3  -2   39.98    0.73
  -3   3  -2   40.55    0.74
   3  -3   2   39.45    0.75
   3  -3   2   39.07    0.73
   3  -3   2   40.25    0.77
   3  -3   2   40.59    0.76
   3  -3   2   40.44    0.74
  -4   3  -2    0.84    0.09
  -4   3  -2    0.85    0.11
  -4   3  -2    0.79    0.09
  -4   3  -2    0.80    0.11
  -4   3  -2    0.82    0.10
   4  -3   2    0.85    0.09
   4  -3   2    0.64    0.08
   4  -3   2    0.83    0.11
   4  -3   2    0.79    0.10
  -5   3  -2   14.37    0.40
  -5   3  -2   14.50    0.35
  -5   3  -2   14.73    0.36
  -5   3  -2   14.02    0.39
  -5   3  -2   13.88    0.35
   5  -3   2   14.09    0.35
   5  -3   2   14.15    0.34
   5  -3   2   14.32    0.41
  -6   3  -2   15.74    0.39
  -6   3  -2   16.18    0.45
  -6   3  -2   15.77    0.45
  -6   3  -2   15.67    0.41
  -6   3  -2   15.99    0.39
   6  -3   2   16.20    0.39
   6  -3   2   16.60    0.47
   6  -3   2   15.79    0.38
  -7   3  -2    5.31    0.28
  -7   3  -2    5.50    0.28
  -7   3  -2    5.52    0.24
  -7   3  -2    5.50    0.22
  -7   3  -2    5.38    0.22
   7  -3   2    5.63    0.22
   7  -3   2    5.41    0.28
   7  -3   2    5.38    0.21
  -8   3  -2   -0.04    0.11
  -8   3  -2    0.06    0.08
  -8   3  -2    0.06    0.11
  -8   3  -2    0.02    0.09
  -8   3  -2    0.09    0.08
   8  -3   2   -0.06    0.07
  -9   3  -2    4.90    0.30
  -9   3  -2    4.49    0.22
  -9   3  -2    4.84    0.22
  -9   3  -2    4.43    0.24
  -9   3  -2    4.63    0.30
   9  -3   2    4.63    0.20
 -10   3  -2    0.06    0.13
 -10   3  -2    0.01    0.08
 -10   3  -2    0.14    0.10
 -10   3  -2    0.02    0.08
 -10   3  -2    0.00    0.14
  10  -3   2    0.01    0.04
 -11   3  -2    0.03    0.17
 -11   3  -2    0.19    0.11
 -11   3  -2   -0.05    0.09
 -11   3  -2    0.08    0.09
 -11   3  -2    0.03    0.14
  11  -3   2   -0.02    0.03
 -12   3  -2    0.79    0.21
 -12   3  -2    0.66    0.19
 -12   3  -2    0.99    0.14
 -13   3  -2    0.77    0.22
 -13   3  -2    0.54    0.20
 -13   3  -2    1.00    0.15
 -14   3  -2    0.06    0.19
 -14   3  -2    0.04    0.10
 -14   3  -2   -0.13    0.16
 -15   3  -2    1.21    0.29
 -15   3  -2    1.45    0.26
 -15   3  -2    1.29    0.16
 -16   3  -2   -0.04    0.20
 -16   3  -2   -0.06    0.10
 -16   3  -2    0.11    0.20
 -17  -2   2    2.18    0.31
 -17  -2   2    1.22    0.27
 -16  -2   2    3.57    0.36
 -16  -2   2    3.71    0.37
 -16  -2   2    4.24    0.37
 -15  -2   2    0.20    0.18
 -15  -2   2    0.16    0.17
 -15  -2   2   -0.07    0.18
 -14  -2   2    1.14    0.22
 -14  -2   2    1.06    0.22
 -14  -2   2    1.23    0.24
 -13  -2   2    0.65    0.21
 -13  -2   2    0.56    0.18
 -13  -2   2    0.64    0.18
 -12  -2   2    0.25    0.14
 -12  -2   2    0.10    0.14
 -12  -2   2    0.26    0.16
 -11  -2   2    0.09    0.14
 -11  -2   2    0.16    0.03
 -11  -2   2    0.10    0.12
 -11  -2   2    0.16    0.16
 -11  -2   2    0.17    0.03
 -10  -2   2    0.21    0.13
 -10  -2   2    0.38    0.04
 -10  -2   2    0.30    0.13
 -10  -2   2    0.30    0.04
 -10  -2   2    0.27    0.13
   9   2  -2   23.22    0.64
  -9  -2   2   24.75    0.41
  -9  -2   2   23.48    0.63
  -9  -2   2   24.31    0.62
  -9  -2   2   23.02    0.41
  -9  -2   2   23.60    0.64
   8   2  -2    3.86    0.25
  -8  -2   2    3.18    0.23
  -8  -2   2    3.49    0.09
  -8  -2   2    3.48    0.23
  -8  -2   2    3.38    0.09
  -8  -2   2    3.68    0.24
   7   2  -2    0.36    0.12
  -7  -2   2    0.37    0.03
  -7  -2   2    0.31    0.11
  -7  -2   2    0.40    0.12
  -7  -2   2    0.21    0.11
  -7  -2   2    0.33    0.03
   6   2  -2   18.60    0.47
  -6  -2   2   17.91    0.46
  -6  -2   2   18.68    0.32
  -6  -2   2   19.10    0.47
  -6  -2   2   19.02    0.32
  -6  -2   2   19.31    0.48
   5   2  -2   12.29    0.34
  -5  -2   2   12.58    0.22
  -5  -2   2   12.42    0.34
  -5  -2   2   12.34    0.22
  -5  -2   2   12.63    0.33
   4   2  -2    0.45    0.03
   4   2  -2    0.40    0.03
   4   2  -2    0.53    0.10
  -4  -2   2    0.49    0.04
  -4  -2   2    0.50    0.04
  -4  -2   2    0.51    0.08
  -4  -2   2    0.44    0.09
   3   2  -2  559.04   10.17
   3   2  -2  528.20    9.43
   3   2  -2  566.72   10.02
   3   2  -2  539.54    9.34
  -3  -2   2  546.05    9.27
  -3  -2   2  541.60    9.44
  -3  -2   2  569.84   10.57
  -3  -2   2  565.72   10.43
   2   2  -2   70.83    1.21
   2   2  -2   69.27    1.22
   2   2  -2   70.58    1.18
  -2  -2   2   69.76    1.15
  -2  -2   2   71.80    1.21
  -2  -2   2   72.68    1.18
  -2  -2   2   70.64    1.24
   1   2  -2   72.90    1.34
   1   2  -2   73.38    1.28
  -1  -2   2   69.20    1.29
  -1  -2   2   73.12    1.25
  -1  -2   2   74.06    1.28
  -1  -2   2   70.28    1.18
  -1  -2   2   68.68    1.28
   0   2  -2   26.59    0.48
   0   2  -2   26.43    0.47
   0   2  -2   25.48    0.47
   0   2  -2   25.91    0.47
   0  -2   2   25.45    0.47
   0  -2   2   25.36    0.48
   0  -2   2   26.13    0.47
   0  -2   2   26.27    0.45
   0  -2   2   26.18    0.47
  -1   2  -2  137.16    2.21
  -1   2  -2  126.10    2.21
  -1   2  -2  130.13    2.26
  -1   2  -2  128.28    2.08
  -1   2  -2  116.80    2.07
   1  -2   2  128.23    2.24
   1  -2   2  123.48    2.15
   1  -2   2  124.49    2.27
   1  -2   2  126.06    2.08
   1  -2   2  132.59    2.28
  -2   2  -2   28.16    0.51
  -2   2  -2   26.20    0.52
  -2   2  -2   26.15    0.50
  -2   2  -2   26.71    0.52
  -2   2  -2   26.82    0.52
   2  -2   2   25.62    0.50
   2  -2   2   26.01    0.52
   2  -2   2   26.17    0.50
   2  -2   2   27.90    0.53
   2  -2   2   27.18    0.52
  -3   2  -2   76.32    1.29
  -3   2  -2   72.54    1.25
  -3   2  -2   74.45    1.28
  -3   2  -2   72.74    1.29
  -3   2  -2   73.07    1.25
   3  -2   2   73.77    1.29
   3  -2   2   72.42    1.29
   3  -2   2   73.26    1.25
   3  -2   2   72.94    1.25
   3  -2   2   72.80    1.29
  -4   2  -2    8.52    0.23
  -4   2  -2    8.86    0.26
  -4   2  -2    8.69    0.27
  -4   2  -2    8.50    0.27
  -4   2  -2    8.28    0.23
   4  -2   2    8.85    0.27
   4  -2   2    8.24    0.23
   4  -2   2    8.66    0.27
   4  -2   2    7.85    0.22
  -5   2  -2    3.87    0.21
  -5   2  -2    3.58    0.20
  -5   2  -2    3.59    0.16
  -5   2  -2    3.75    0.19
  -5   2  -2    3.92    0.16
   5  -2   2    3.79    0.16
   5  -2   2    4.12    0.22
   5  -2   2    3.62    0.16
  -6   2  -2  188.08    3.18
  -6   2  -2  189.11    3.10
  -6   2  -2  187.64    3.20
  -6   2  -2  182.98    3.10
  -6   2  -2  189.24    3.20
   6  -2   2  196.02    3.22
   6  -2   2  188.53    3.09
   6  -2   2  185.16    3.10
[truncated: 2,492,078 more chars]
