# Supplementary material for: A crystalline monosubstituted carbene
Source: Springer Nature journal article supplement (doi:10.1038/s41557-018-0153-1), 2018-10-05
Supplement: 41557_2018_153_MOESM76_ESM.mol [file 41557_2018_153_MOESM76_ESM.mol]

nchem.18010067C-comp9.mol
  ChemDraw09031813422D

153167  0  0  0  0  0  0  0  0999 V2000
    0.0681   -0.1572    0.0000 C   0  0  0  0  0  0  0  0  0  0  0  0
    0.0681    1.1777    0.0000 C   0  0  0  0  0  0  0  0  0  0  0  0
   -0.7165    0.9228    0.0000 C   0  0  0  0  0  0  0  0  0  0  0  0
   -1.4310    1.3353    0.0000 C   0  0  0  0  0  0  0  0  0  0  0  0
   -2.1454    0.9228    0.0000 C   0  0  0  0  0  0  0  0  0  0  0  0
   -2.1454    0.0978    0.0000 C   0  0  0  0  0  0  0  0  0  0  0  0
   -1.4310   -0.3147    0.0000 C   0  0  0  0  0  0  0  0  0  0  0  0
   -0.7165    0.0978    0.0000 C   0  0  0  0  0  0  0  0  0  0  0  0
   -1.8239    4.1706    0.0000 C   0  0  0  0  0  0  0  0  0  0  0  0
   -1.1714    4.6755    0.0000 C   0  0  0  0  0  0  0  0  0  0  0  0
   -1.2825    5.4930    0.0000 C   0  0  0  0  0  0  0  0  0  0  0  0
   -2.0460    5.8056    0.0000 C   0  0  0  0  0  0  0  0  0  0  0  0
   -2.6984    5.3007    0.0000 C   0  0  0  0  0  0  0  0  0  0  0  0
   -2.5874    4.4832    0.0000 C   0  0  0  0  0  0  0  0  0  0  0  0
   -1.7380    3.5544    0.0000 C   0  0  0  0  0  0  0  0  0  0  0  0
   -2.4376    3.1172    0.0000 C   0  0  0  0  0  0  0  0  0  0  0  0
   -2.4088    2.2927    0.0000 C   0  0  0  0  0  0  0  0  0  0  0  0
   -1.6804    1.9054    0.0000 C   0  0  0  0  0  0  0  0  0  0  0  0
   -0.9807    2.3426    0.0000 C   0  0  0  0  0  0  0  0  0  0  0  0
   -1.0095    3.1671    0.0000 C   0  0  0  0  0  0  0  0  0  0  0  0
   -3.1084    1.8555    0.0000 C   0  0  0  0  0  0  0  0  0  0  0  0
   -3.8369    2.2429    0.0000 C   0  0  0  0  0  0  0  0  0  0  0  0
   -4.5365    1.8057    0.0000 C   0  0  0  0  0  0  0  0  0  0  0  0
   -4.5077    0.9812    0.0000 C   0  0  0  0  0  0  0  0  0  0  0  0
   -3.7793    0.5939    0.0000 C   0  0  0  0  0  0  0  0  0  0  0  0
   -3.0796    1.0310    0.0000 C   0  0  0  0  0  0  0  0  0  0  0  0
    4.0171    3.0805    0.0000 C   0  0  0  0  0  0  0  0  0  0  0  0
    4.3087    2.3088    0.0000 C   0  0  0  0  0  0  0  0  0  0  0  0
    5.1228    2.1754    0.0000 C   0  0  0  0  0  0  0  0  0  0  0  0
    5.6454    2.8137    0.0000 C   0  0  0  0  0  0  0  0  0  0  0  0
    5.3539    3.5855    0.0000 C   0  0  0  0  0  0  0  0  0  0  0  0
    4.5397    3.7189    0.0000 C   0  0  0  0  0  0  0  0  0  0  0  0
    3.2030    3.2139    0.0000 C   0  0  0  0  0  0  0  0  0  0  0  0
    3.0499    4.0246    0.0000 C   0  0  0  0  0  0  0  0  0  0  0  0
    2.2713    4.2973    0.0000 C   0  0  0  0  0  0  0  0  0  0  0  0
    1.6458    3.7594    0.0000 C   0  0  0  0  0  0  0  0  0  0  0  0
    1.7989    2.9487    0.0000 C   0  0  0  0  0  0  0  0  0  0  0  0
    2.5775    2.6760    0.0000 C   0  0  0  0  0  0  0  0  0  0  0  0
    2.2054    4.9624    0.0000 C   0  0  0  0  0  0  0  0  0  0  0  0
    1.4422    5.2757    0.0000 C   0  0  0  0  0  0  0  0  0  0  0  0
    1.3318    6.0932    0.0000 C   0  0  0  0  0  0  0  0  0  0  0  0
    1.9847    6.5976    0.0000 C   0  0  0  0  0  0  0  0  0  0  0  0
    2.7479    6.2844    0.0000 C   0  0  0  0  0  0  0  0  0  0  0  0
    2.8583    5.4668    0.0000 C   0  0  0  0  0  0  0  0  0  0  0  0
    2.1865   -4.7993    0.0000 C   0  0  0  0  0  0  0  0  0  0  0  0
    2.7304   -5.4196    0.0000 C   0  0  0  0  0  0  0  0  0  0  0  0
    2.4651   -6.2008    0.0000 C   0  0  0  0  0  0  0  0  0  0  0  0
    1.6560   -6.3616    0.0000 C   0  0  0  0  0  0  0  0  0  0  0  0
    1.1121   -5.7413    0.0000 C   0  0  0  0  0  0  0  0  0  0  0  0
    1.3774   -4.9601    0.0000 C   0  0  0  0  0  0  0  0  0  0  0  0
    2.4310   -4.1345    0.0000 C   0  0  0  0  0  0  0  0  0  0  0  0
    3.2390   -3.9677    0.0000 C   0  0  0  0  0  0  0  0  0  0  0  0
    3.4985   -3.1846    0.0000 C   0  0  0  0  0  0  0  0  0  0  0  0
    2.9500   -2.5683    0.0000 C   0  0  0  0  0  0  0  0  0  0  0  0
    2.1421   -2.7351    0.0000 C   0  0  0  0  0  0  0  0  0  0  0  0
    1.8826   -3.5182    0.0000 C   0  0  0  0  0  0  0  0  0  0  0  0
    4.2437   -3.1449    0.0000 C   0  0  0  0  0  0  0  0  0  0  0  0
    4.6768   -3.8471    0.0000 C   0  0  0  0  0  0  0  0  0  0  0  0
    5.5014   -3.8231    0.0000 C   0  0  0  0  0  0  0  0  0  0  0  0
    5.8930   -3.0969    0.0000 C   0  0  0  0  0  0  0  0  0  0  0  0
    5.4599   -2.3947    0.0000 C   0  0  0  0  0  0  0  0  0  0  0  0
    4.6352   -2.4187    0.0000 C   0  0  0  0  0  0  0  0  0  0  0  0
   -3.8437   -1.4460    0.0000 C   0  0  0  0  0  0  0  0  0  0  0  0
   -3.9015   -0.6230    0.0000 C   0  0  0  0  0  0  0  0  0  0  0  0
   -4.6432   -0.2617    0.0000 C   0  0  0  0  0  0  0  0  0  0  0  0
   -5.3270   -0.7233    0.0000 C   0  0  0  0  0  0  0  0  0  0  0  0
   -5.2691   -1.5462    0.0000 C   0  0  0  0  0  0  0  0  0  0  0  0
   -4.5274   -1.9076    0.0000 C   0  0  0  0  0  0  0  0  0  0  0  0
   -3.1020   -1.8073    0.0000 C   0  0  0  0  0  0  0  0  0  0  0  0
   -3.0441   -2.6303    0.0000 C   0  0  0  0  0  0  0  0  0  0  0  0
   -2.3025   -2.9917    0.0000 C   0  0  0  0  0  0  0  0  0  0  0  0
   -1.6187   -2.5301    0.0000 C   0  0  0  0  0  0  0  0  0  0  0  0
   -1.6766   -1.7071    0.0000 C   0  0  0  0  0  0  0  0  0  0  0  0
   -2.4182   -1.3457    0.0000 C   0  0  0  0  0  0  0  0  0  0  0  0
   -2.2321   -3.7476    0.0000 C   0  0  0  0  0  0  0  0  0  0  0  0
   -2.9385   -4.1737    0.0000 C   0  0  0  0  0  0  0  0  0  0  0  0
   -2.9228   -4.9985    0.0000 C   0  0  0  0  0  0  0  0  0  0  0  0
   -2.2006   -5.3973    0.0000 C   0  0  0  0  0  0  0  0  0  0  0  0
   -1.4941   -4.9713    0.0000 C   0  0  0  0  0  0  0  0  0  0  0  0
   -1.5099   -4.1464    0.0000 C   0  0  0  0  0  0  0  0  0  0  0  0
    0.5531    0.5103    0.0000 N   0  0  0  0  0  0  0  0  0  0  0  0
    1.3781    0.5103    0.0000 C   0  0  0  0  0  0  0  0  0  0  0  0
    1.5915    1.3066    0.0000 H   0  0  0  0  0  0  0  0  0  0  0  0
    1.5406   -0.2990    0.0000 C   0  0  0  0  0  0  0  0  0  0  0  0
    2.1594    0.2467    0.0000 C   0  0  0  0  0  0  0  0  0  0  0  0
    1.7032   -1.1075    0.0000 C   0  0  0  0  0  0  0  0  0  0  0  0
    2.4845   -1.3710    0.0000 C   0  0  0  0  0  0  0  0  0  0  0  0
    3.1040   -0.8261    0.0000 C   0  0  0  0  0  0  0  0  0  0  0  0
    2.9414   -0.0168    0.0000 C   0  0  0  0  0  0  0  0  0  0  0  0
   -3.7505   -0.2306    0.0000 C   0  0  0  0  0  0  0  0  0  0  0  0
   -4.5713   -0.2593    0.0000 F   0  0  0  0  0  0  0  0  0  0  0  0
   -3.7218   -1.0514    0.0000 F   0  0  0  0  0  0  0  0  0  0  0  0
   -2.9297   -0.2020    0.0000 F   0  0  0  0  0  0  0  0  0  0  0  0
   -3.4619    5.6133    0.0000 C   0  0  0  0  0  0  0  0  0  0  0  0
   -3.1507    6.3733    0.0000 F   0  0  0  0  0  0  0  0  0  0  0  0
   -4.2219    5.9244    0.0000 F   0  0  0  0  0  0  0  0  0  0  0  0
   -3.7731    4.8532    0.0000 F   0  0  0  0  0  0  0  0  0  0  0  0
   -5.2649    2.1930    0.0000 C   0  0  0  0  0  0  0  0  0  0  0  0
   -4.8794    2.9181    0.0000 F   0  0  0  0  0  0  0  0  0  0  0  0
   -5.9901    2.5786    0.0000 F   0  0  0  0  0  0  0  0  0  0  0  0
   -5.6505    1.4678    0.0000 F   0  0  0  0  0  0  0  0  0  0  0  0
   -0.6345    5.9984    0.0000 C   0  0  0  0  0  0  0  0  0  0  0  0
   -0.1294    5.3508    0.0000 F   0  0  0  0  0  0  0  0  0  0  0  0
    0.0132    6.5034    0.0000 F   0  0  0  0  0  0  0  0  0  0  0  0
   -1.1395    6.6460    0.0000 F   0  0  0  0  0  0  0  0  0  0  0  0
    3.4008    6.7887    0.0000 C   0  0  0  0  0  0  0  0  0  0  0  0
    3.9029    6.1388    0.0000 F   0  0  0  0  0  0  0  0  0  0  0  0
    4.0507    7.2908    0.0000 F   0  0  0  0  0  0  0  0  0  0  0  0
    2.8987    7.4387    0.0000 F   0  0  0  0  0  0  0  0  0  0  0  0
    5.8765    4.2239    0.0000 C   0  0  0  0  0  0  0  0  0  0  0  0
    6.5120    3.7037    0.0000 F   0  0  0  0  0  0  0  0  0  0  0  0
    6.3967    4.8594    0.0000 F   0  0  0  0  0  0  0  0  0  0  0  0
    5.2410    4.7441    0.0000 F   0  0  0  0  0  0  0  0  0  0  0  0
    0.5686    6.4065    0.0000 C   0  0  0  0  0  0  0  0  0  0  0  0
    0.8804    7.1663    0.0000 F   0  0  0  0  0  0  0  0  0  0  0  0
   -0.1912    6.7183    0.0000 F   0  0  0  0  0  0  0  0  0  0  0  0
    0.2568    5.6467    0.0000 F   0  0  0  0  0  0  0  0  0  0  0  0
    5.4144    1.4036    0.0000 C   0  0  0  0  0  0  0  0  0  0  0  0
    4.6461    1.1134    0.0000 F   0  0  0  0  0  0  0  0  0  0  0  0
    5.7046    0.6353    0.0000 F   0  0  0  0  0  0  0  0  0  0  0  0
    6.1827    1.6938    0.0000 F   0  0  0  0  0  0  0  0  0  0  0  0
    5.8514   -1.6686    0.0000 C   0  0  0  0  0  0  0  0  0  0  0  0
    6.5743   -2.0583    0.0000 F   0  0  0  0  0  0  0  0  0  0  0  0
    6.2412   -0.9457    0.0000 F   0  0  0  0  0  0  0  0  0  0  0  0
    5.1285   -1.2788    0.0000 F   0  0  0  0  0  0  0  0  0  0  0  0
    0.3029   -5.9022    0.0000 C   0  0  0  0  0  0  0  0  0  0  0  0
    0.1428   -5.0966    0.0000 F   0  0  0  0  0  0  0  0  0  0  0  0
   -0.5026   -6.0623    0.0000 F   0  0  0  0  0  0  0  0  0  0  0  0
    0.4631   -6.7077    0.0000 F   0  0  0  0  0  0  0  0  0  0  0  0
    5.9345   -4.5252    0.0000 C   0  0  0  0  0  0  0  0  0  0  0  0
    5.2355   -4.9564    0.0000 F   0  0  0  0  0  0  0  0  0  0  0  0
    6.3657   -5.2242    0.0000 F   0  0  0  0  0  0  0  0  0  0  0  0
    6.6335   -4.0941    0.0000 F   0  0  0  0  0  0  0  0  0  0  0  0
    3.0090   -6.8211    0.0000 C   0  0  0  0  0  0  0  0  0  0  0  0
    2.3915   -7.3625    0.0000 F   0  0  0  0  0  0  0  0  0  0  0  0
    3.5505   -7.4387    0.0000 F   0  0  0  0  0  0  0  0  0  0  0  0
    3.6266   -6.2797    0.0000 F   0  0  0  0  0  0  0  0  0  0  0  0
   -0.7719   -5.3700    0.0000 C   0  0  0  0  0  0  0  0  0  0  0  0
   -1.1689   -6.0890    0.0000 F   0  0  0  0  0  0  0  0  0  0  0  0
   -0.0529   -5.7670    0.0000 F   0  0  0  0  0  0  0  0  0  0  0  0
   -0.3749   -4.6511    0.0000 F   0  0  0  0  0  0  0  0  0  0  0  0
   -5.9529   -2.0078    0.0000 C   0  0  0  0  0  0  0  0  0  0  0  0
   -6.4124   -1.3272    0.0000 F   0  0  0  0  0  0  0  0  0  0  0  0
   -6.6335   -2.4674    0.0000 F   0  0  0  0  0  0  0  0  0  0  0  0
   -5.4933   -2.6885    0.0000 F   0  0  0  0  0  0  0  0  0  0  0  0
   -3.6293   -5.4246    0.0000 C   0  0  0  0  0  0  0  0  0  0  0  0
   -4.0534   -4.7213    0.0000 F   0  0  0  0  0  0  0  0  0  0  0  0
   -4.3325   -5.8487    0.0000 F   0  0  0  0  0  0  0  0  0  0  0  0
   -3.2051   -6.1279    0.0000 F   0  0  0  0  0  0  0  0  0  0  0  0
   -4.7011    0.5613    0.0000 C   0  0  0  0  0  0  0  0  0  0  0  0
   -3.8818    0.6189    0.0000 F   0  0  0  0  0  0  0  0  0  0  0  0
   -4.7587    1.3806    0.0000 F   0  0  0  0  0  0  0  0  0  0  0  0
   -5.5203    0.5037    0.0000 F   0  0  0  0  0  0  0  0  0  0  0  0
 90 91  1  0      
 90 92  1  0      
 90 93  1  0      
 25 90  1  0      
 94 95  1  0      
 94 96  1  0      
 94 97  1  0      
 13 94  1  0      
 98 99  1  0      
 98100  1  0      
 98101  1  0      
 23 98  1  0      
102103  1  0      
102104  1  0      
102105  1  0      
 11102  1  0      
106107  1  0      
106108  1  0      
106109  1  0      
 43106  1  0      
110111  1  0      
110112  1  0      
110113  1  0      
 31110  1  0      
114115  1  0      
114116  1  0      
114117  1  0      
 41114  1  0      
118119  1  0      
118120  1  0      
118121  1  0      
 29118  1  0      
122123  1  0      
122124  1  0      
122125  1  0      
 61122  1  0      
126127  1  0      
126128  1  0      
126129  1  0      
 49126  1  0      
130131  1  0      
130132  1  0      
130133  1  0      
 59130  1  0      
134135  1  0      
134136  1  0      
134137  1  0      
 47134  1  0      
138139  1  0      
138140  1  0      
138141  1  0      
 79138  1  0      
142143  1  0      
142144  1  0      
142145  1  0      
 67142  1  0      
146147  1  0      
146148  1  0      
146149  1  0      
 77146  1  0      
150151  1  0      
150152  1  0      
150153  1  0      
 65150  1  0      
  1 81  1  0      
 81  2  1  0      
  2  3  1  0      
  3  4  1  0      
  4  5  2  0      
  5  6  1  0      
  6  7  2  0      
  7  8  1  0      
  1  8  1  0      
  3  8  2  0      
  9 10  1  0      
 10 11  2  0      
 11 12  1  0      
 12 13  2  0      
 13 14  1  0      
  9 14  2  0      
 15 16  1  0      
 16 17  2  0      
 17 18  1  0      
 18 19  2  0      
 19 20  1  0      
 15 20  2  0      
  9 15  1  0      
 21 22  1  0      
 22 23  2  0      
 23 24  1  0      
 24 25  2  0      
 25 26  1  0      
 21 26  2  0      
 17 21  1  0      
  2 19  1  0      
 27 28  1  0      
 28 29  2  0      
 29 30  1  0      
 30 31  2  0      
 31 32  1  0      
 27 32  2  0      
 33 34  1  0      
 34 35  2  0      
 35 36  1  0      
 36 37  2  0      
 37 38  1  0      
 33 38  2  0      
 27 33  1  0      
 39 40  1  0      
 40 41  2  0      
 41 42  1  0      
 42 43  2  0      
 43 44  1  0      
 39 44  2  0      
 35 39  1  0      
  2 37  1  0      
 45 46  1  0      
 46 47  2  0      
 47 48  1  0      
 48 49  2  0      
 49 50  1  0      
 45 50  2  0      
 51 52  1  0      
 52 53  2  0      
 53 54  1  0      
 54 55  2  0      
 55 56  1  0      
 51 56  2  0      
 45 51  1  0      
 57 58  1  0      
 58 59  2  0      
 59 60  1  0      
 60 61  2  0      
 61 62  1  0      
 57 62  2  0      
 53 57  1  0      
  1 55  1  0      
 63 64  1  0      
 64 65  2  0      
 65 66  1  0      
 66 67  2  0      
 67 68  1  0      
 63 68  2  0      
 69 70  1  0      
 70 71  2  0      
 71 72  1  0      
 72 73  2  0      
 73 74  1  0      
 69 74  2  0      
 63 69  1  0      
 75 76  1  0      
 76 77  2  0      
 77 78  1  0      
 78 79  2  0      
 79 80  1  0      
 75 80  2  0      
 71 75  1  0      
  1 73  1  0      
 82 81  1  6      
 82 83  1  1      
 82 84  1  0      
 84 85  1  0      
 85 82  1  0      
 84 86  1  1      
 86 87  1  0      
 88 89  1  0      
 85 89  1  1      
M  STY  1   1 SUP
M  SLB  1   1   1
M  SAL   1  4  90  91  92  93
M  SBL   1  1   4
M  SMT   1 CF3
M  SBV   1   4   -0.0288    0.8245
M  STY  1   2 SUP
M  SLB  1   2   2
M  SAL   2  4  94  95  96  97
M  SBL   2  1   8
M  SMT   2 CF3
M  SBV   2   8    0.7635   -0.3126
M  STY  1   3 SUP
M  SLB  1   3   3
M  SAL   3  4  98  99 100 101
M  SBL   3  1  12
M  SMT   3 CF3
M  SBV   3  12    0.7284   -0.3873
M  STY  1   4 SUP
M  SLB  1   4   4
M  SAL   4  4 102 103 104 105
M  SBL   4  1  16
M  SMT   4 CF3
M  SBV   4  16   -0.6480   -0.5054
M  STY  1   5 SUP
M  SLB  1   5   5
M  SAL   5  4 106 107 108 109
M  SBL   5  1  20
M  SMT   5 CF3
M  SBV   5  20   -0.6529   -0.5044
M  STY  1   6 SUP
M  SLB  1   6   6
M  SAL   6  4 110 111 112 113
M  SBL   6  1  24
M  SMT   6 CF3
M  SBV   6  24   -0.5226   -0.6384
M  STY  1   7 SUP
M  SLB  1   7   7
M  SAL   7  4 114 115 116 117
M  SBL   7  1  28
M  SMT   7 CF3
M  SBV   7  28    0.7632   -0.3132
M  STY  1   8 SUP
M  SLB  1   8   8
M  SAL   8  4 118 119 120 121
M  SBL   8  1  32
M  SMT   8 CF3
M  SBV   8  32   -0.2916    0.7718
M  STY  1   9 SUP
M  SLB  1   9   9
M  SAL   9  4 122 123 124 125
M  SBL   9  1  36
M  SMT   9 CF3
M  SBV   9  36   -0.3915   -0.7262
M  STY  1  10 SUP
M  SLB  1  10  10
M  SAL  10  4 126 127 128 129
M  SBL  10  1  40
M  SMT  10 CF3
M  SBV  10  40    0.8092    0.1609
M  STY  1  11 SUP
M  SLB  1  11  11
M  SAL  11  4 130 131 132 133
M  SBL  11  1  44
M  SMT  11 CF3
M  SBV  11  44   -0.4331    0.7022
M  STY  1  12 SUP
M  SLB  1  12  12
M  SAL  12  4 134 135 136 137
M  SBL  12  1  48
M  SMT  12 CF3
M  SBV  12  48   -0.5439    0.6203
M  STY  1  13 SUP
M  SLB  1  13  13
M  SAL  13  4 138 139 140 141
M  SBL  13  1  52
M  SMT  13 CF3
M  SBV  13  52   -0.7222    0.3988
M  STY  1  14 SUP
M  SLB  1  14  14
M  SAL  14  4 142 143 144 145
M  SBL  14  1  56
M  SMT  14 CF3
M  SBV  14  56    0.6838    0.4616
M  STY  1  15 SUP
M  SLB  1  15  15
M  SAL  15  4 146 147 148 149
M  SBL  15  1  60
M  SMT  15 CF3
M  SBV  15  60    0.7065    0.4261
M  STY  1  16 SUP
M  SLB  1  16  16
M  SAL  16  4 150 151 152 153
M  SBL  16  1  64
M  SMT  16 CF3
M  SBV  16  64    0.0579   -0.8230
M  END
