# Supplementary material for: A crystalline monosubstituted carbene
Source: Springer Nature journal article supplement (doi:10.1038/s41557-018-0153-1), 2018-10-05
Supplement: 41557_2018_153_MOESM81_ESM.cif [file 41557_2018_153_MOESM81_ESM.cif]

data_gb_rj_rn_20180329_0m_a_sq_sq
_audit_creation_date               2018-04-09
_audit_creation_method
;
Olex2 1.2-beta
(compiled 2018.04.03 svn.r3497 for OlexSys, GUI svn.r5486)
;
_shelx_SHELXL_version_number       '2016/6'
_audit_contact_author_address      ?
_audit_contact_author_email        ?
_audit_contact_author_name         ''
_audit_contact_author_phone        ?
_publ_contact_author_id_orcid      ?
_publ_section_references
;
Dolomanov, O.V., Bourhis, L.J., Gildea, R.J, Howard, J.A.K. & Puschmann, H.
 (2009), J. Appl. Cryst. 42, 339-341.

Sheldrick, G.M. (2008). Acta Cryst. A64, 112-122.

Sheldrick, G.M. (2015). Acta Cryst. A71, 3-8.
;
_chemical_name_common              ?
_chemical_name_systematic          ?
_chemical_formula_moiety           'C103 H53 F48 N'
_chemical_formula_sum              'C103 H53 F48 N'
_chemical_formula_weight           2216.46
_chemical_melting_point            ?
loop_
  _atom_type_symbol
  _atom_type_description
  _atom_type_scat_dispersion_real
  _atom_type_scat_dispersion_imag
  _atom_type_scat_source
 'C' 'C' 0.0033 0.0016 'International Tables Vol C Tables 4.2.6.8 and 6.1.1.4'
 'H' 'H' 0.0000 0.0000 'International Tables Vol C Tables 4.2.6.8 and 6.1.1.4'
 'F' 'F' 0.0171 0.0103 'International Tables Vol C Tables 4.2.6.8 and 6.1.1.4'
 'N' 'N' 0.0061 0.0033 'International Tables Vol C Tables 4.2.6.8 and 6.1.1.4'

_shelx_space_group_comment
;
The symmetry employed for this shelxl refinement is uniquely defined
by the following loop, which should always be used as a source of
symmetry information in preference to the above space-group names.
They are only intended as comments.
;
_space_group_crystal_system        'triclinic'
_space_group_IT_number             2
_space_group_name_H-M_alt          'P -1'
_space_group_name_Hall             '-P 1'
loop_
  _space_group_symop_operation_xyz
 'x, y, z'
 '-x, -y, -z'

_cell_length_a                     14.9856(9)
_cell_length_b                     15.4379(9)
_cell_length_c                     27.5452(16)
_cell_angle_alpha                  104.1490(10)
_cell_angle_beta                   92.4820(10)
_cell_angle_gamma                  117.0170(10)
_cell_volume                       5416.3(6)
_cell_formula_units_Z              2
_cell_measurement_reflns_used      9823
_cell_measurement_temperature      100.0
_cell_measurement_theta_max        23.64
_cell_measurement_theta_min        2.33
_shelx_estimated_absorpt_T_max     0.997
_shelx_estimated_absorpt_T_min     0.967
_exptl_absorpt_coefficient_mu      0.137
_exptl_absorpt_correction_T_max    0.4898
_exptl_absorpt_correction_T_min    0.4508
_exptl_absorpt_correction_type     multi-scan
_exptl_absorpt_process_details    
 'SADABS-2016/2 (Bruker,2016/2) was used for absorption correction. wR2(int) was 0.1272 before and 0.0420 after correction. The Ratio of minimum to maximum transmission is 0.9204. The \l/2 correction factor is Not present.'
_exptl_absorpt_special_details     ?
_exptl_crystal_colour              'clear light yellow'
_exptl_crystal_colour_lustre       clear
_exptl_crystal_colour_modifier     light
_exptl_crystal_colour_primary      yellow
_exptl_crystal_density_diffrn      1.359
_exptl_crystal_density_meas        ?
_exptl_crystal_density_method      ?
_exptl_crystal_description         block
_exptl_crystal_F_000               2220
_exptl_crystal_size_max            0.25
_exptl_crystal_size_mid            0.032
_exptl_crystal_size_min            0.02
_exptl_transmission_factor_max     ?
_exptl_transmission_factor_min     ?
_diffrn_reflns_av_R_equivalents    0.0436
_diffrn_reflns_av_unetI/netI       0.0445
_diffrn_reflns_Laue_measured_fraction_full  0.992
_diffrn_reflns_Laue_measured_fraction_max  0.992
_diffrn_reflns_limit_h_max         16
_diffrn_reflns_limit_h_min         -17
_diffrn_reflns_limit_k_max         18
_diffrn_reflns_limit_k_min         -16
_diffrn_reflns_limit_l_max         32
_diffrn_reflns_limit_l_min         -32
_diffrn_reflns_number              81825
_diffrn_reflns_point_group_measured_fraction_full  0.992
_diffrn_reflns_point_group_measured_fraction_max  0.992
_diffrn_reflns_theta_full          24.825
_diffrn_reflns_theta_max           24.825
_diffrn_reflns_theta_min           1.514
_diffrn_ambient_temperature        100.0
_diffrn_detector                   'Bruker APEX-II CCD'
_diffrn_detector_area_resol_mean   7.9
_diffrn_detector_type              'CCD Area Detector'
_diffrn_measured_fraction_theta_full  0.992
_diffrn_measured_fraction_theta_max  0.992
_diffrn_measurement_device         'Kappa Four-Circle Diffractometer'
_diffrn_measurement_device_type    'Bruker APEX II TXS - Artemis'
_diffrn_measurement_method         '\w and \f scans'
_diffrn_radiation_monochromator    'Double Bounce Multilayer Mirrors'
_diffrn_radiation_probe            X-ray
_diffrn_radiation_type             MoK\a
_diffrn_radiation_wavelength       0.71073
_diffrn_source                     'Micro Focus Rotating Anode'
_diffrn_source_type                'Bruker TXS'
_diffrn_standards_number           0
_reflns_Friedel_coverage           0.000
_reflns_Friedel_fraction_full      .
_reflns_Friedel_fraction_max       .
_reflns_number_gt                  12413
_reflns_number_total               18596
_reflns_special_details
;
 Reflections were merged by SHELXL according to the crystal
 class for the calculation of statistics and refinement.
 
 Structure factors included contributions from the .fab file.
 
 _reflns_Friedel_fraction is defined as the number of unique
 Friedel pairs measured divided by the number that would be
 possible theoretically, ignoring centric projections and
 systematic absences.
;
_reflns_threshold_expression       'I > 2\s(I)'
_computing_cell_refinement         'SAINT v8.37A (Bruker, 2015)'
_computing_data_collection         'APEX2 v2013.6-2 (Bruker, 2013)'
_computing_data_reduction          'SAINT v8.37A (Bruker, 2015)'
_computing_molecular_graphics      'Olex2 (Dolomanov et al., 2009)'
_computing_publication_material    'Olex2 (Dolomanov et al., 2009)'
_computing_structure_refinement    'XL (Sheldrick, 2008)'
_computing_structure_solution      'ShelXT (Sheldrick, 2015)'
_refine_diff_density_max           1.052
_refine_diff_density_min           -0.764
_refine_diff_density_rms           0.076
_refine_ls_extinction_coef         .
_refine_ls_extinction_method       none
_refine_ls_goodness_of_fit_ref     1.015
_refine_ls_hydrogen_treatment      constr
_refine_ls_matrix_type             full
_refine_ls_number_parameters       1530
_refine_ls_number_reflns           18596
_refine_ls_number_restraints       347
_refine_ls_R_factor_all            0.1247
_refine_ls_R_factor_gt             0.0882
_refine_ls_restrained_S_all        1.018
_refine_ls_shift/su_max            0.000
_refine_ls_shift/su_mean           0.000
_refine_ls_structure_factor_coef   Fsqd
_refine_ls_weighting_details      
 'w=1/[\s^2^(Fo^2^)+(0.1288P)^2^+10.9282P] where P=(Fo^2^+2Fc^2^)/3'
_refine_ls_weighting_scheme        calc
_refine_ls_wR_factor_gt            0.2312
_refine_ls_wR_factor_ref           0.2601
_refine_special_details            ?
_olex2_refinement_description
;
1. Fixed Uiso
 At 1.2 times of:
  All C(H) groups, All C(H,H) groups
 At 1.5 times of:
  All C(H,H,H) groups
2. Restrained distances
 F46-F48A
 2.11 with sigma of 0.02
 F48A-F47A
 2.11 with sigma of 0.02
 F47A-F46
 2.11 with sigma of 0.02
 F46-C1A = F48A-C1A = F47A-C1A = F47-C103 = F48-C103 = F46-C103
 1.32 with sigma of 0.02
 C103-C98 = C1A-C97A
 1.5 with sigma of 0.02
3. Uiso/Uaniso restraints and constraints
Uanis(C96) = Uanis(C96A)
Uanis(C98) = Uanis(C97A)
Uanis(C99) = Uanis(C98A)
Uanis(C1A) = Uanis(C103)
Uanis(F48) = Uanis(F48A)
Uanis(F47) = Uanis(F47A)
4. Rigid body (RIGU) restrains
 F28A, F29A, C73, F30A
 with sigma for 1-2 distances of 0.004 and sigma for 1-3 distances of 0.004
 F28, C73, F29, F30
 with sigma for 1-2 distances of 0.004 and sigma for 1-3 distances of 0.004
 F39, C94, F37, F38
 with sigma for 1-2 distances of 0.004 and sigma for 1-3 distances of 0.004
 F38A, C94, F37A, F39A
 with sigma for 1-2 distances of 0.004 and sigma for 1-3 distances of 0.004
 F031, C102, F44A, F43A
 with sigma for 1-2 distances of 0.004 and sigma for 1-3 distances of 0.004
 F45A, C102, F43, F44
 with sigma for 1-2 distances of 0.004 and sigma for 1-3 distances of 0.004
 C98, C103, F48, F47, F46
 with sigma for 1-2 distances of 0.004 and sigma for 1-3 distances of 0.004
 F46, F48A, F47A, C1A, C97A
 with sigma for 1-2 distances of 0.004 and sigma for 1-3 distances of 0.004
 C100, C98A, C97A, C96A, C97, C1A, F48A, F46, F47A
 with sigma for 1-2 distances of 0.02 and sigma for 1-3 distances of 0.02
 C97, C96, C98, C99, C100, C103, F48, F47, F46
 with sigma for 1-2 distances of 0.02 and sigma for 1-3 distances of 0.02
 F5A, C29, F6A, F4A, C26
 with sigma for 1-2 distances of 0.004 and sigma for 1-3 distances of 0.004
 F5, F6, C29, F4, C26
 with sigma for 1-2 distances of 0.004 and sigma for 1-3 distances of 0.004
 F17, C51, F18, F16, C46
 with sigma for 1-2 distances of 0.004 and sigma for 1-3 distances of 0.004
 F17A, C51A, F18A, F16, C46
 with sigma for 1-2 distances of 0.004 and sigma for 1-3 distances of 0.004
5. Others
 Sof(F28)=Sof(F29)=Sof(F30)=1-FVAR(1)
 Sof(F29A)=Sof(F28A)=Sof(F30A)=FVAR(1)
 Sof(F39)=Sof(F37)=Sof(F38)=1-FVAR(2)
 Sof(F38A)=Sof(F39A)=Sof(F37A)=FVAR(2)
 Sof(F45A)=Sof(F43)=Sof(F44)=1-FVAR(3)
 Sof(F031)=Sof(F43A)=Sof(F44A)=FVAR(3)
 Sof(C96)=Sof(H96)=Sof(C99)=Sof(H99)=Sof(C98)=Sof(F48)=Sof(F47)=Sof(C103)=1-
 FVAR(4)
 Sof(C96A)=Sof(H96A)=Sof(C97A)=Sof(C98A)=Sof(H98A)=Sof(C1A)=Sof(F47A)=
 Sof(F48A)=FVAR(4)
 Sof(F4)=Sof(F5)=Sof(F6)=1-FVAR(5)
 Sof(F5A)=Sof(F4A)=Sof(F6A)=FVAR(5)
 Sof(C51)=Sof(F17)=Sof(F18)=1-FVAR(6)
 Sof(F18A)=Sof(F17A)=Sof(C51A)=FVAR(6)
6.a Ternary CH refined with riding coordinates:
 C1(H1), C3(H3), C2(H2)
6.b Secondary CH2 refined with riding coordinates:
 C4(H4A,H4B), C6(H6A,H6B)
6.c Aromatic/amide H refined with riding coordinates:
 C83(H83), C21(H21), C85(H85), C10(H10), C13(H13), C65(H65), C43(H43),
 C89(H89), C61(H61), C17(H17), C41(H41), C11(H11), C12(H12), C87(H87), C93(H93),
  C39(H39), C63(H63), C49(H49), C75(H75), C91(H91), C79(H79), C19(H19),
 C31(H31), C67(H67), C27(H27), C71(H71), C23(H23), C53(H53), C101(H101),
 C57(H57), C77(H77), C55(H55), C69(H69), C35(H35), C45(H45), C25(H25), C47(H47),
  C33(H33), C96(H96), C99(H99), C96A(H96A), C98A(H98A)
6.d Idealised Me refined as rotating group:
 C5(H5A,H5B,H5C), C7(H7A,H7B,H7C)
;
_atom_sites_solution_hydrogens     geom
_atom_sites_solution_primary       dual
_atom_sites_solution_secondary     ?
loop_
  _atom_site_label
  _atom_site_type_symbol
  _atom_site_fract_x
  _atom_site_fract_y
  _atom_site_fract_z
  _atom_site_U_iso_or_equiv
  _atom_site_adp_type
  _atom_site_occupancy
  _atom_site_site_symmetry_order
  _atom_site_calc_flag
  _atom_site_refinement_flags_posn
  _atom_site_refinement_flags_adp
  _atom_site_refinement_flags_occupancy
  _atom_site_disorder_assembly
  _atom_site_disorder_group
 F42 F 0.5757(2) -0.1700(2) 0.45171(10) 0.0647(8) Uani 1 1 d . . . . .
 N1 N 0.4318(2) 0.2368(2) 0.75680(10) 0.0217(6) Uani 1 1 d . . . . .
 F41 F 0.7092(2) -0.0434(2) 0.49874(14) 0.0807(11) Uani 1 1 d . . . . .
 F31 F 0.6416(3) -0.2102(3) 0.85496(13) 0.0775(10) Uani 1 1 d . . . . .
 F8 F 0.6553(3) 0.3927(3) 0.48493(11) 0.0694(9) Uani 1 1 d . . . . .
 F40 F 0.6362(3) -0.1815(3) 0.51913(12) 0.0787(10) Uani 1 1 d . . . . .
 F19 F 0.1603(3) 0.2902(3) 1.03899(11) 0.0797(10) Uani 1 1 d . . . . .
 F36 F 0.9836(2) 0.2004(3) 0.78282(16) 0.0840(11) Uani 1 1 d . . . . .
 F15 F 0.3260(3) 0.8461(2) 0.85205(15) 0.0831(11) Uani 1 1 d . . . . .
 F32 F 0.7666(3) -0.2151(3) 0.82358(16) 0.0911(12) Uani 1 1 d . . . . .
 F35 F 0.9339(3) 0.0740(3) 0.71716(14) 0.0862(11) Uani 1 1 d . . . . .
 F25 F 0.4031(3) 0.3766(3) 1.02698(14) 0.0968(13) Uani 1 1 d . . . . .
 F24 F 0.1671(3) -0.0953(3) 0.84546(16) 0.1013(14) Uani 1 1 d . . . . .
 F13 F 0.4316(3) 0.8227(3) 0.89164(18) 0.1057(15) Uani 1 1 d . . . . .
 F2 F -0.0479(3) 0.2669(4) 0.68686(16) 0.1013(13) Uani 1 1 d . . . . .
 F34 F 1.0137(2) 0.0791(3) 0.78418(17) 0.0970(13) Uani 1 1 d . . . . .
 C9 C 0.5934(3) 0.3686(3) 0.79839(12) 0.0231(8) Uani 1 1 d . . . . .
 F9 F 0.7070(4) 0.5398(3) 0.47739(14) 0.1029(14) Uani 1 1 d . . . . .
 C14 C 0.5304(3) 0.4112(3) 0.79780(13) 0.0225(8) Uani 1 1 d . . . . .
 F33 F 0.6271(3) -0.2714(3) 0.77561(15) 0.0957(13) Uani 1 1 d . . . . .
 C8 C 0.5412(3) 0.2591(3) 0.76482(13) 0.0224(8) Uani 1 1 d . . . . .
 C15 C 0.4261(3) 0.3342(3) 0.76612(13) 0.0229(8) Uani 1 1 d . . . . .
 C83 C 0.5488(3) 0.1563(3) 0.67810(13) 0.0260(8) Uani 1 1 d . . . . .
 H83 H 0.497557 0.096630 0.683864 0.031 Uiso 1 1 calc R . . . .
 C88 C 0.5411(3) 0.0489(3) 0.59298(13) 0.0268(8) Uani 1 1 d . . . . .
 F38A F 0.2302(3) -0.1326(4) 0.5639(3) 0.079(2) Uani 0.799(14) 1 d . U P A 1
 C16 C 0.4081(3) 0.3559(3) 0.71571(13) 0.0242(8) Uani 1 1 d . . . . .
 C38 C 0.3461(3) 0.3349(3) 0.79904(13) 0.0246(8) Uani 1 1 d . . . . .
 C84 C 0.5860(3) 0.1488(3) 0.63238(13) 0.0265(8) Uani 1 1 d . . . . .
 F26 F 0.5116(4) 0.3815(3) 1.07846(13) 0.1036(14) Uani 1 1 d . . . . .
 C60 C 0.5555(3) 0.1964(3) 0.79700(13) 0.0273(8) Uani 1 1 d . . . . .
 C21 C 0.3100(3) 0.3104(3) 0.68867(14) 0.0284(8) Uani 1 1 d . . . . .
 H21 H 0.254134 0.273168 0.703402 0.034 Uiso 1 1 calc R . . . .
 C85 C 0.6646(3) 0.2357(3) 0.62524(14) 0.0295(9) Uani 1 1 d . . . . .
 H85 H 0.691423 0.231043 0.594655 0.035 Uiso 1 1 calc R . . . .
 C18 C 0.4721(3) 0.4223(3) 0.64614(15) 0.0318(9) Uani 1 1 d . . . . .
 F39A F 0.2364(3) -0.2109(6) 0.49194(15) 0.090(3) Uani 0.799(14) 1 d . U P A 1
 C10 C 0.6907(3) 0.4245(3) 0.82723(14) 0.0306(9) Uani 1 1 d . . . . .
 H10 H 0.733336 0.394196 0.828160 0.037 Uiso 1 1 calc R . . . .
 C13 C 0.5647(3) 0.5125(3) 0.82513(14) 0.0276(8) Uani 1 1 d . . . . .
 H13 H 0.521956 0.542774 0.824526 0.033 Uiso 1 1 calc R . . . .
 C65 C 0.6122(3) 0.1459(3) 0.78692(14) 0.0288(8) Uani 1 1 d . . . . .
 H65 H 0.642292 0.145876 0.757264 0.035 Uiso 1 1 calc R . . . .
 C43 C 0.3166(3) 0.4091(3) 0.80407(14) 0.0282(8) Uani 1 1 d . . . . .
 H43 H 0.339341 0.453679 0.783570 0.034 Uiso 1 1 calc R . . . .
 C82 C 0.5855(3) 0.2499(3) 0.71540(13) 0.0239(8) Uani 1 1 d . . . . .
 C89 C 0.4365(3) -0.0157(3) 0.58389(14) 0.0318(9) Uani 1 1 d . . . . .
 H89 H 0.394639 0.005960 0.602500 0.038 Uiso 1 1 calc R . . . .
 C61 C 0.5174(3) 0.2003(3) 0.84200(14) 0.0298(9) Uani 1 1 d . . . . .
 H61 H 0.482224 0.238358 0.850289 0.036 Uiso 1 1 calc R . . . .
 C17 C 0.4882(3) 0.4134(3) 0.69467(14) 0.0286(8) Uani 1 1 d . . . . .
 H17 H 0.555477 0.447578 0.713525 0.034 Uiso 1 1 calc R . . . .
 C41 C 0.2183(3) 0.3514(3) 0.86727(15) 0.0336(9) Uani 1 1 d . . . . .
 H41 H 0.175054 0.357119 0.890611 0.040 Uiso 1 1 calc R . . . .
 C20 C 0.2918(3) 0.3181(3) 0.64014(15) 0.0334(9) Uani 1 1 d . . . . .
 C11 C 0.7245(3) 0.5246(3) 0.85449(14) 0.0324(9) Uani 1 1 d . . . . .
 H11 H 0.791080 0.563755 0.874315 0.039 Uiso 1 1 calc R . . . .
 C12 C 0.6626(3) 0.5683(3) 0.85323(15) 0.0331(9) Uani 1 1 d . . . . .
 H12 H 0.687284 0.637700 0.871886 0.040 Uiso 1 1 calc R . . . .
 C87 C 0.6616(3) 0.3342(3) 0.70642(14) 0.0280(8) Uani 1 1 d . . . . .
 H87 H 0.686257 0.398538 0.731203 0.034 Uiso 1 1 calc R . . . .
 C42 C 0.2539(3) 0.4200(3) 0.83869(15) 0.0317(9) Uani 1 1 d . . . . .
 F14 F 0.4032(4) 0.7769(3) 0.81174(19) 0.1163(16) Uani 1 1 d . . . . .
 C40 C 0.2451(3) 0.2755(3) 0.86212(15) 0.0321(9) Uani 1 1 d . . . . .
 C93 C 0.6006(3) 0.0156(3) 0.56467(14) 0.0309(9) Uani 1 1 d . . . . .
 H93 H 0.672044 0.058706 0.569950 0.037 Uiso 1 1 calc R . . . .
 C39 C 0.3098(3) 0.2681(3) 0.82809(14) 0.0280(8) Uani 1 1 d . . . . .
 H39 H 0.329153 0.216583 0.824792 0.034 Uiso 1 1 calc R . . . .
 C62 C 0.5290(3) 0.1502(3) 0.87526(14) 0.0320(9) Uani 1 1 d . . . . .
 C64 C 0.6257(3) 0.0950(3) 0.81990(14) 0.0328(9) Uani 1 1 d . . . . .
 C90 C 0.3924(3) -0.1108(3) 0.54828(14) 0.0347(9) Uani 1 1 d . . . . .
 C86 C 0.7042(3) 0.3292(3) 0.66239(14) 0.0326(9) Uani 1 1 d . . . . .
 C92 C 0.5567(3) -0.0798(3) 0.52892(15) 0.0360(10) Uani 1 1 d . . . . .
 C52 C 0.2064(3) 0.2018(3) 0.89214(15) 0.0330(9) Uani 1 1 d . . . . .
 C74 C 0.6908(3) 0.0449(3) 0.80991(14) 0.0322(9) Uani 1 1 d . . . . .
 C1 C 0.3632(3) 0.1546(3) 0.71316(14) 0.0285(8) Uani 1 1 d . . . . .
 H1 H 0.377886 0.167694 0.679830 0.034 Uiso 1 1 calc R . . . .
 F37A F 0.2551(4) -0.2561(5) 0.5572(3) 0.091(3) Uani 0.799(14) 1 d . U P A 1
 F7 F 0.5493(3) 0.4390(5) 0.46728(13) 0.1262(19) Uani 1 1 d . . . . .
 F20 F 0.2125(5) 0.1915(4) 1.05634(14) 0.1193(17) Uani 1 1 d . . . . .
 F1 F -0.1526(3) 0.1307(4) 0.63065(17) 0.1240(17) Uani 1 1 d . . . . .
 C63 C 0.5824(3) 0.0958(3) 0.86351(15) 0.0372(10) Uani 1 1 d . . . . .
 H63 H 0.589062 0.059267 0.885351 0.045 Uiso 1 1 calc R . . . .
 C22 C 0.1855(3) 0.2681(3) 0.61179(15) 0.0375(10) Uani 1 1 d . . . . .
 C95 C 0.6202(4) -0.1173(4) 0.50031(17) 0.0448(11) Uani 1 1 d . . . . .
 C44 C 0.2272(3) 0.5025(3) 0.84479(17) 0.0398(10) Uani 1 1 d . . . . .
 C49 C 0.2997(3) 0.5993(3) 0.84589(16) 0.0384(10) Uani 1 1 d . . . . .
 H49 H 0.366846 0.611880 0.842143 0.046 Uiso 1 1 calc R . . . .
 C30 C 0.5581(3) 0.4839(3) 0.62364(16) 0.0394(10) Uani 1 1 d . . . . .
 F27 F 0.5584(4) 0.4430(3) 1.01909(19) 0.131(2) Uani 1 1 d . . . . .
 C75 C 0.6617(3) -0.0495(3) 0.81782(14) 0.0352(10) Uani 1 1 d . . . . .
 H75 H 0.599129 -0.083305 0.828895 0.042 Uiso 1 1 calc R . . . .
 F5A F -0.0526(5) 0.0584(5) 0.4593(2) 0.102(3) Uani 0.795(16) 1 d . U P B 1
 C66 C 0.4887(3) 0.1597(3) 0.92379(15) 0.0346(10) Uani 1 1 d . . . . .
 C76 C 0.7240(4) -0.0940(3) 0.80953(16) 0.0409(11) Uani 1 1 d . . . . .
 F23 F 0.0858(5) -0.1357(3) 0.90158(18) 0.144(2) Uani 1 1 d . . . . .
 C91 C 0.4518(3) -0.1440(3) 0.52079(15) 0.0362(10) Uani 1 1 d . . . . .
 H91 H 0.421560 -0.209685 0.496661 0.043 Uiso 1 1 calc R . . . .
 C79 C 0.7828(3) 0.0925(3) 0.79324(16) 0.0387(10) Uani 1 1 d . . . . .
 H79 H 0.802908 0.156245 0.787129 0.046 Uiso 1 1 calc R . . . .
 C19 C 0.3734(3) 0.3727(3) 0.61903(15) 0.0345(9) Uani 1 1 d . . . . .
 H19 H 0.361826 0.376436 0.585591 0.041 Uiso 1 1 calc R . . . .
 F21 F 0.0553(4) 0.1390(3) 1.03101(18) 0.179(3) Uani 1 1 d . . . . .
 C3 C 0.2513(3) 0.0921(3) 0.71397(16) 0.0381(10) Uani 1 1 d . . . . .
 H3 H 0.231698 0.107422 0.748022 0.046 Uiso 1 1 calc R . . . .
 C31 C 0.5611(4) 0.4507(4) 0.57230(16) 0.0417(11) Uani 1 1 d . . . . .
 H31 H 0.508957 0.386358 0.551576 0.050 Uiso 1 1 calc R . . . .
 C67 C 0.5018(4) 0.2532(4) 0.95264(15) 0.0413(11) Uani 1 1 d . . . . .
 H67 H 0.535575 0.311024 0.940917 0.050 Uiso 1 1 calc R . . . .
 F4A F 0.0622(8) 0.1992(6) 0.4528(3) 0.113(4) Uani 0.795(16) 1 d . U P B 1
 C94 C 0.2791(4) -0.1781(4) 0.53951(17) 0.0453(11) Uani 1 1 d . U . . .
 C54 C 0.1389(3) 0.0301(3) 0.89755(17) 0.0419(11) Uani 1 1 d . . . . .
 C27 C 0.1647(4) 0.2239(4) 0.55969(17) 0.0482(12) Uani 1 1 d . . . . .
 H27 H 0.217779 0.224345 0.541965 0.058 Uiso 1 1 calc R . . . .
 C2 C 0.3197(3) 0.0445(3) 0.71127(18) 0.0415(10) Uani 1 1 d . . . . .
 H2 H 0.310077 0.000348 0.676105 0.050 Uiso 1 1 calc R . . . .
 C71 C 0.4368(4) 0.0752(4) 0.94114(16) 0.0443(11) Uani 1 1 d . . . . .
 H71 H 0.426746 0.010305 0.921948 0.053 Uiso 1 1 calc R . . . .
 C23 C 0.1072(3) 0.2669(4) 0.63700(18) 0.0457(11) Uani 1 1 d . . . . .
 H23 H 0.121347 0.297706 0.672758 0.055 Uiso 1 1 calc R . . . .
 C53 C 0.1782(3) 0.1004(3) 0.87018(16) 0.0346(9) Uani 1 1 d . . . . .
 H53 H 0.185764 0.078235 0.836014 0.042 Uiso 1 1 calc R . . . .
 C101 C 0.8209(3) 0.4348(3) 0.61196(17) 0.0428(11) Uani 1 1 d . . . . .
 H101 H 0.781958 0.381932 0.581439 0.051 Uiso 1 1 calc R . . . .
 C48 C 0.2767(4) 0.6786(3) 0.8523(2) 0.0484(12) Uani 1 1 d . . . . .
 C78 C 0.8452(3) 0.0476(4) 0.78549(17) 0.0417(10) Uani 1 1 d . . . . .
 C57 C 0.1955(3) 0.2329(4) 0.94246(16) 0.0417(11) Uani 1 1 d . . . . .
 H57 H 0.214420 0.302263 0.958278 0.050 Uiso 1 1 calc R . . . .
 C68 C 0.4664(4) 0.2639(4) 0.99838(16) 0.0475(12) Uani 1 1 d . . . . .
 C77 C 0.8161(4) -0.0462(4) 0.79356(17) 0.0448(11) Uani 1 1 d . . . . .
 H77 H 0.858426 -0.077130 0.788245 0.054 Uiso 1 1 calc R . . . .
 C32 C 0.6396(4) 0.5109(4) 0.55128(19) 0.0522(13) Uani 1 1 d . . . . .
 C72 C 0.4854(5) 0.3666(4) 1.03073(19) 0.0593(15) Uani 1 1 d . . . . .
 C56 C 0.1572(4) 0.1629(4) 0.96935(17) 0.0486(12) Uani 1 1 d . . . . .
 C97 C 0.7917(3) 0.4234(4) 0.65779(16) 0.0497(12) Uani 1 1 d . U . . .
 C70 C 0.4000(4) 0.0858(4) 0.98628(18) 0.0510(13) Uani 1 1 d . . . . .
 C59 C 0.1036(4) -0.0791(4) 0.8715(2) 0.0533(13) Uani 1 1 d . . . . .
 C80 C 0.6903(4) -0.1966(4) 0.8166(2) 0.0531(13) Uani 1 1 d . . . . .
 F22 F 0.0206(4) -0.1199(3) 0.8411(3) 0.183(3) Uani 1 1 d . . . . .
 C26 C 0.0638(4) 0.1779(4) 0.53284(19) 0.0562(13) Uani 1 1 d . U . . .
 C55 C 0.1294(4) 0.0624(4) 0.94777(18) 0.0494(12) Uani 1 1 d . . . . .
 H55 H 0.103931 0.015434 0.966909 0.059 Uiso 1 1 calc R . . . .
 C24 C 0.0082(4) 0.2212(4) 0.6106(2) 0.0578(14) Uani 1 1 d . . . . .
 F031 F 0.8647(7) 0.4788(12) 0.5223(3) 0.092(4) Uani 0.58(2) 1 d . U P C 1
 F11 F 0.8826(5) 0.7641(4) 0.6478(2) 0.182(3) Uani 1 1 d . . . . .
 F3 F -0.1176(4) 0.2687(6) 0.6179(2) 0.159(3) Uani 1 1 d . . . . .
 C50 C 0.3566(4) 0.7807(4) 0.8531(2) 0.0589(14) Uani 1 1 d . . . . .
 C81 C 0.9442(4) 0.1004(4) 0.7676(2) 0.0570(13) Uani 1 1 d . . . . .
 F43A F 0.989(2) 0.6199(9) 0.5606(6) 0.158(9) Uani 0.58(2) 1 d . U P C 1
 C4 C 0.3355(4) -0.0003(4) 0.7502(2) 0.0561(13) Uani 1 1 d . . . . .
 H4A H 0.334580 0.039568 0.784157 0.067 Uiso 1 1 calc R . . . .
 H4B H 0.402945 0.002521 0.750990 0.067 Uiso 1 1 calc R . . . .
 C73 C 0.3437(5) -0.0051(5) 1.0040(2) 0.0619(13) Uani 1 1 d . U . . .
 F6A F 0.0965(7) 0.0850(10) 0.4616(3) 0.123(4) Uani 0.795(16) 1 d . U P B 1
 C36 C 0.6384(4) 0.4689(5) 0.49476(19) 0.0595(15) Uani 1 1 d . . . . .
 C69 C 0.4148(4) 0.1795(4) 1.01489(17) 0.0521(13) Uani 1 1 d . . . . .
 H69 H 0.389656 0.185979 1.045900 0.063 Uiso 1 1 calc R . . . .
 C100 C 0.9059(4) 0.5215(4) 0.60941(19) 0.0647(16) Uani 1 1 d . U . . .
 C58 C 0.1439(5) 0.1955(5) 1.0239(2) 0.0700(17) Uani 1 1 d . . . . .
 C35 C 0.6349(5) 0.5759(4) 0.6525(2) 0.0690(17) Uani 1 1 d . . . . .
 H35 H 0.635462 0.599757 0.687777 0.083 Uiso 1 1 calc R . . . .
 F29A F 0.2575(6) -0.0629(6) 0.9772(4) 0.096(5) Uani 0.609(18) 1 d . U P D 1
 F12 F 0.8113(5) 0.7421(5) 0.7116(2) 0.230(5) Uani 1 1 d . . . . .
 F16 F -0.0055(4) 0.6305(4) 0.8824(3) 0.154(2) Uani 1 1 d . U . . .
 C45 C 0.1304(4) 0.4869(4) 0.8507(3) 0.0681(17) Uani 1 1 d . . . . .
 H45 H 0.078557 0.421036 0.849560 0.082 Uiso 1 1 calc R . . . .
 C6 C 0.1696(4) 0.0603(4) 0.66954(19) 0.0522(12) Uani 1 1 d . . . . .
 H6A H 0.198261 0.058213 0.637839 0.063 Uiso 1 1 calc R . . . .
 H6B H 0.144836 0.110807 0.674260 0.063 Uiso 1 1 calc R . . . .
 C102 C 0.9390(4) 0.5295(5) 0.5595(2) 0.0616(13) Uani 1 1 d . U . . .
 C25 C -0.0119(4) 0.1773(5) 0.5582(2) 0.0664(16) Uani 1 1 d . . . . .
 H25 H -0.079363 0.146412 0.540033 0.080 Uiso 1 1 calc R . . . .
 F18A F -0.0602(8) 0.5005(10) 0.8066(8) 0.122(4) Uani 0.61(3) 1 d . U P E 1
 F28A F 0.3389(10) 0.0198(7) 1.0529(3) 0.103(4) Uani 0.609(18) 1 d . U P D 1
 C28 C -0.0757(5) 0.2230(6) 0.6371(3) 0.0799(19) Uani 1 1 d . . . . .
 C29 C 0.0430(5) 0.1334(6) 0.4772(2) 0.0774(17) Uani 1 1 d . U . . .
 F30A F 0.3967(8) -0.0558(9) 1.0033(5) 0.110(5) Uani 0.609(18) 1 d . U P D 1
 C47 C 0.1811(4) 0.6630(4) 0.8589(3) 0.0718(18) Uani 1 1 d . . . . .
 H47 H 0.165361 0.717218 0.863682 0.086 Uiso 1 1 calc R . . . .
 F17A F -0.0543(13) 0.4737(17) 0.8756(13) 0.156(9) Uani 0.61(3) 1 d . U P E 1
 F44A F 0.9979(16) 0.484(2) 0.5484(6) 0.159(7) Uani 0.58(2) 1 d . U P C 1
 C33 C 0.7150(5) 0.6027(5) 0.5801(2) 0.0738(18) Uani 1 1 d . . . . .
 H33 H 0.768737 0.643718 0.565456 0.089 Uiso 1 1 calc R . . . .
 C46 C 0.1083(4) 0.5678(5) 0.8583(3) 0.080(2) Uani 1 1 d . U . . .
 C5 C 0.2538(5) -0.1089(4) 0.7389(3) 0.0787(18) Uani 1 1 d . . . . .
 H5A H 0.252778 -0.147597 0.704640 0.118 Uiso 1 1 calc GR . . . .
 H5B H 0.187657 -0.111187 0.740636 0.118 Uiso 1 1 calc GR . . . .
 H5C H 0.267731 -0.138768 0.763854 0.118 Uiso 1 1 calc GR . . . .
 C7 C 0.0820(4) -0.0431(5) 0.6649(2) 0.0699(16) Uani 1 1 d . . . . .
 H7A H 0.024646 -0.057129 0.640035 0.105 Uiso 1 1 calc GR . . . .
 H7B H 0.061034 -0.044326 0.698035 0.105 Uiso 1 1 calc GR . . . .
 H7C H 0.103173 -0.095064 0.653548 0.105 Uiso 1 1 calc GR . . . .
 C34 C 0.7127(6) 0.6351(4) 0.6300(2) 0.089(2) Uani 1 1 d . . . . .
 C51A C -0.0072(18) 0.538(2) 0.8540(10) 0.092(4) Uani 0.61(3) 1 d . U P E 1
 C96 C 0.8434(6) 0.5096(6) 0.7007(2) 0.070(2) Uani 0.813(4) 1 d . U P F 2
 H96 H 0.822693 0.506299 0.732598 0.084 Uiso 0.813(4) 1 calc R . P F 2
 F10 F 0.7675(8) 0.8103(4) 0.6598(5) 0.280(6) Uani 1 1 d . . . . .
 C99 C 0.9559(6) 0.6050(6) 0.6513(3) 0.078(3) Uani 0.813(4) 1 d . U P F 2
 H99 H 1.011458 0.665836 0.649011 0.094 Uiso 0.813(4) 1 calc R . P F 2
 C37 C 0.7925(9) 0.7400(7) 0.6621(4) 0.172(6) Uani 1 1 d . . . . .
 C98 C 0.9225(7) 0.5977(6) 0.6977(3) 0.090(3) Uani 0.813(4) 1 d D U P F 2
 F46 F 1.0561(6) 0.6878(5) 0.7660(2) 0.199(3) Uani 1 1 d D U . . .
 F28 F 0.2497(9) -0.0160(10) 1.0184(7) 0.088(6) Uani 0.391(18) 1 d . U P D 2
 F29 F 0.3828(11) -0.0078(14) 1.0424(7) 0.106(6) Uani 0.391(18) 1 d . U P D 2
 F30 F 0.3162(14) -0.0970(7) 0.9704(5) 0.096(7) Uani 0.391(18) 1 d . U P D 2
 F39 F 0.2343(15) -0.1378(17) 0.5239(13) 0.088(10) Uani 0.201(14) 1 d . U P A 2
 F37 F 0.2471(14) -0.193(3) 0.5776(7) 0.083(9) Uani 0.201(14) 1 d . U P A 2
 F38 F 0.2528(12) -0.2669(15) 0.5078(11) 0.083(10) Uani 0.201(14) 1 d . U P A 2
 F45A F 0.8821(16) 0.553(3) 0.5302(7) 0.127(9) Uani 0.42(2) 1 d . U P C 2
 F43 F 0.933(2) 0.4471(9) 0.5334(8) 0.137(10) Uani 0.42(2) 1 d . U P C 2
 F44 F 1.0279(8) 0.5991(16) 0.5623(6) 0.085(6) Uani 0.42(2) 1 d . U P C 2
 C96A C 0.880(3) 0.464(3) 0.7032(12) 0.070(2) Uani 0.187(4) 1 d . U P F 1
 H96A H 0.870855 0.433941 0.729991 0.084 Uiso 0.187(4) 1 calc R . P F 1
 C97A C 0.976(2) 0.548(3) 0.7034(10) 0.090(3) Uani 0.187(4) 1 d D U P F 1
 C98A C 0.992(3) 0.562(3) 0.6532(13) 0.078(3) Uani 0.187(4) 1 d . U P F 1
 H98A H 1.059366 0.597758 0.647902 0.094 Uiso 0.187(4) 1 calc R . P F 1
 F48 F 1.0058(5) 0.7767(4) 0.73556(19) 0.134(2) Uani 0.813(4) 1 d D U P F 2
 F47 F 0.9199(6) 0.6825(5) 0.78099(19) 0.189(4) Uani 0.813(4) 1 d D U P F 2
 C103 C 0.9755(8) 0.6871(7) 0.7443(3) 0.126(3) Uani 0.813(4) 1 d D U P F 2
 C1A C 1.0614(17) 0.6029(16) 0.7498(8) 0.126(3) Uani 0.187(4) 1 d D U P F 1
 F47A F 1.059(2) 0.5788(14) 0.7933(7) 0.189(4) Uani 0.187(4) 1 d D U P F 1
 F48A F 1.1576(13) 0.6523(14) 0.7453(7) 0.134(2) Uani 0.187(4) 1 d D U P F 1
 F4 F 0.003(3) 0.183(4) 0.4517(15) 0.138(14) Uani 0.205(16) 1 d . U P B 2
 F5 F 0.017(5) 0.053(2) 0.4595(11) 0.137(14) Uani 0.205(16) 1 d . U P B 2
 F6 F 0.1333(19) 0.165(3) 0.4543(7) 0.087(8) Uani 0.205(16) 1 d . U P B 2
 C51 C 0.013(2) 0.553(2) 0.883(2) 0.110(8) Uani 0.39(3) 1 d . U P E 2
 F17 F -0.003(2) 0.5220(19) 0.9225(17) 0.149(11) Uani 0.39(3) 1 d . U P E 2
 F18 F -0.0603(16) 0.4861(15) 0.8412(18) 0.128(12) Uani 0.39(3) 1 d . U P E 2

loop_
  _atom_site_aniso_label
  _atom_site_aniso_U_11
  _atom_site_aniso_U_22
  _atom_site_aniso_U_33
  _atom_site_aniso_U_23
  _atom_site_aniso_U_13
  _atom_site_aniso_U_12
 F42 0.084(2) 0.079(2) 0.0412(16) -0.0028(15) 0.0194(15) 0.0571(18)
 N1 0.0281(16) 0.0235(16) 0.0194(15) 0.0082(12) 0.0073(12) 0.0163(14)
 F41 0.0557(19) 0.063(2) 0.104(3) -0.0063(18) 0.0494(18) 0.0255(17)
 F31 0.132(3) 0.085(2) 0.082(2) 0.0589(19) 0.072(2) 0.085(2)
 F8 0.095(2) 0.083(2) 0.0537(18) 0.0266(16) 0.0349(17) 0.058(2)
 F40 0.110(3) 0.113(3) 0.073(2) 0.039(2) 0.0404(19) 0.095(2)
 F19 0.111(3) 0.079(2) 0.0439(17) 0.0109(16) 0.0367(18) 0.043(2)
 F36 0.0549(19) 0.066(2) 0.126(3) 0.028(2) 0.0340(19) 0.0227(17)
 F15 0.079(2) 0.0515(19) 0.128(3) 0.0311(19) 0.004(2) 0.0378(18)
 F32 0.113(3) 0.104(3) 0.141(3) 0.084(3) 0.075(3) 0.094(3)
 F35 0.066(2) 0.112(3) 0.077(2) 0.031(2) 0.0360(18) 0.036(2)
 F25 0.115(3) 0.092(3) 0.093(3) -0.014(2) -0.023(2) 0.082(3)
 F24 0.123(3) 0.063(2) 0.125(3) 0.021(2) 0.083(3) 0.049(2)
 F13 0.080(2) 0.055(2) 0.155(4) 0.039(2) -0.041(3) 0.0118(19)
 F2 0.060(2) 0.155(4) 0.093(3) 0.021(3) 0.024(2) 0.061(2)
 F34 0.0505(19) 0.125(3) 0.155(4) 0.073(3) 0.027(2) 0.058(2)
 C9 0.030(2) 0.034(2) 0.0136(17) 0.0098(15) 0.0108(15) 0.0202(17)
 F9 0.172(4) 0.115(3) 0.078(2) 0.072(2) 0.088(3) 0.087(3)
 C14 0.0263(19) 0.033(2) 0.0162(17) 0.0137(15) 0.0131(14) 0.0171(17)
 F33 0.152(4) 0.0466(19) 0.079(3) 0.0239(19) 0.021(2) 0.038(2)
 C8 0.0269(19) 0.032(2) 0.0183(18) 0.0097(15) 0.0101(15) 0.0205(17)
 C15 0.0263(19) 0.029(2) 0.0208(18) 0.0125(15) 0.0109(15) 0.0162(16)
 C83 0.0251(19) 0.038(2) 0.0248(19) 0.0131(17) 0.0100(15) 0.0208(17)
 C88 0.028(2) 0.039(2) 0.0190(18) 0.0092(16) 0.0083(15) 0.0197(18)
 F38A 0.031(2) 0.069(3) 0.097(5) -0.022(3) 0.018(3) 0.014(2)
 C16 0.032(2) 0.030(2) 0.0215(18) 0.0114(16) 0.0124(16) 0.0214(17)
 C38 0.0245(19) 0.033(2) 0.0197(18) 0.0095(16) 0.0073(15) 0.0151(17)
 C84 0.026(2) 0.039(2) 0.0192(18) 0.0065(16) 0.0074(15) 0.0207(18)
 F26 0.164(4) 0.128(3) 0.046(2) -0.007(2) -0.006(2) 0.111(3)
 C60 0.037(2) 0.031(2) 0.0204(19) 0.0081(16) 0.0068(16) 0.0219(18)
 C21 0.030(2) 0.037(2) 0.028(2) 0.0155(17) 0.0093(16) 0.0209(18)
 C85 0.025(2) 0.046(2) 0.0200(19) 0.0071(17) 0.0120(15) 0.0200(19)
 C18 0.041(2) 0.035(2) 0.029(2) 0.0180(18) 0.0176(18) 0.0213(19)
 F39A 0.038(2) 0.139(7) 0.034(2) 0.004(3) 0.0025(17) 0.004(3)
 C10 0.034(2) 0.044(2) 0.0229(19) 0.0092(18) 0.0097(16) 0.0253(19)
 C13 0.033(2) 0.033(2) 0.0243(19) 0.0105(17) 0.0108(16) 0.0200(18)
 C65 0.038(2) 0.035(2) 0.0222(19) 0.0100(17) 0.0102(16) 0.0229(19)
 C43 0.025(2) 0.029(2) 0.033(2) 0.0112(17) 0.0078(16) 0.0131(17)
 C82 0.030(2) 0.033(2) 0.0166(18) 0.0095(16) 0.0073(15) 0.0205(17)
 C89 0.038(2) 0.041(2) 0.0191(19) 0.0082(17) 0.0097(17) 0.021(2)
 C61 0.039(2) 0.038(2) 0.023(2) 0.0119(17) 0.0109(17) 0.0258(19)
 C17 0.032(2) 0.035(2) 0.027(2) 0.0119(17) 0.0107(16) 0.0206(18)
 C41 0.032(2) 0.040(2) 0.035(2) 0.0100(19) 0.0205(18) 0.0224(19)
 C20 0.040(2) 0.042(2) 0.032(2) 0.0136(19) 0.0096(18) 0.029(2)
 C11 0.032(2) 0.042(2) 0.0197(19) 0.0045(17) 0.0040(16) 0.0172(19)
 C12 0.039(2) 0.032(2) 0.029(2) 0.0086(17) 0.0117(18) 0.0166(19)
 C87 0.032(2) 0.034(2) 0.0188(18) 0.0062(16) 0.0095(16) 0.0165(18)
 C42 0.028(2) 0.033(2) 0.035(2) 0.0081(18) 0.0110(17) 0.0162(18)
 F14 0.122(3) 0.055(2) 0.142(4) 0.024(2) 0.068(3) 0.017(2)
 C40 0.026(2) 0.037(2) 0.029(2) 0.0108(18) 0.0119(16) 0.0111(18)
 C93 0.030(2) 0.039(2) 0.024(2) 0.0077(17) 0.0079(16) 0.0178(19)
 C39 0.030(2) 0.035(2) 0.028(2) 0.0118(17) 0.0113(16) 0.0210(18)
 C62 0.046(2) 0.039(2) 0.0216(19) 0.0109(17) 0.0102(17) 0.027(2)
 C64 0.045(2) 0.039(2) 0.026(2) 0.0095(18) 0.0082(18) 0.029(2)
 C90 0.039(2) 0.042(2) 0.023(2) 0.0085(18) 0.0059(17) 0.019(2)
 C86 0.032(2) 0.041(2) 0.022(2) 0.0088(18) 0.0098(16) 0.0145(19)
 C92 0.048(3) 0.045(3) 0.026(2) 0.0107(19) 0.0143(18) 0.030(2)
 C52 0.028(2) 0.039(2) 0.033(2) 0.0134(18) 0.0151(17) 0.0138(18)
 C74 0.044(2) 0.040(2) 0.026(2) 0.0097(18) 0.0049(17) 0.030(2)
 C1 0.033(2) 0.031(2) 0.024(2) 0.0090(16) 0.0121(16) 0.0163(18)
 F37A 0.052(3) 0.073(4) 0.153(7) 0.068(5) 0.025(3) 0.015(3)
 F7 0.125(3) 0.276(6) 0.0436(19) 0.059(3) 0.037(2) 0.143(4)
 F20 0.217(5) 0.127(4) 0.040(2) 0.028(2) 0.033(3) 0.101(4)
 F1 0.053(2) 0.173(5) 0.103(3) 0.042(3) 0.020(2) 0.018(3)
 C63 0.055(3) 0.045(2) 0.029(2) 0.0190(19) 0.0113(19) 0.033(2)
 C22 0.040(2) 0.049(3) 0.032(2) 0.016(2) 0.0016(18) 0.027(2)
 C95 0.055(3) 0.047(3) 0.042(3) 0.007(2) 0.016(2) 0.034(3)
 C44 0.035(2) 0.037(2) 0.051(3) 0.013(2) 0.019(2) 0.020(2)
 C49 0.030(2) 0.043(3) 0.046(3) 0.011(2) 0.0131(19) 0.021(2)
 C30 0.049(3) 0.041(3) 0.033(2) 0.018(2) 0.015(2) 0.022(2)
 F27 0.172(5) 0.069(3) 0.131(4) 0.004(2) 0.099(4) 0.047(3)
 C75 0.052(3) 0.043(2) 0.025(2) 0.0147(18) 0.0119(18) 0.032(2)
 F5A 0.073(4) 0.111(4) 0.046(3) 0.012(3) -0.020(3) -0.009(3)
 C66 0.047(2) 0.051(3) 0.026(2) 0.0196(19) 0.0130(18) 0.036(2)
 C76 0.064(3) 0.048(3) 0.037(2) 0.020(2) 0.015(2) 0.044(2)
 F23 0.286(7) 0.083(3) 0.127(4) 0.073(3) 0.138(4) 0.110(4)
 C91 0.045(3) 0.036(2) 0.028(2) 0.0073(18) 0.0081(18) 0.021(2)
 C79 0.043(3) 0.041(2) 0.040(2) 0.015(2) 0.0036(19) 0.025(2)
 C19 0.049(3) 0.046(3) 0.023(2) 0.0175(18) 0.0126(18) 0.031(2)
 F21 0.185(5) 0.104(3) 0.098(3) -0.017(3) 0.116(4) -0.040(3)
 C3 0.035(2) 0.037(2) 0.033(2) 0.0076(19) 0.0119(18) 0.0104(19)
 C31 0.056(3) 0.054(3) 0.037(2) 0.028(2) 0.021(2) 0.036(2)
 C67 0.061(3) 0.055(3) 0.028(2) 0.020(2) 0.017(2) 0.039(2)
 F4A 0.144(8) 0.089(4) 0.043(3) 0.029(3) -0.004(5) 0.000(5)
 C94 0.044(3) 0.046(3) 0.036(2) 0.004(2) 0.010(2) 0.017(2)
 C54 0.042(3) 0.045(3) 0.049(3) 0.022(2) 0.023(2) 0.025(2)
 C27 0.052(3) 0.059(3) 0.037(3) 0.019(2) 0.003(2) 0.027(2)
 C2 0.045(3) 0.030(2) 0.048(3) 0.008(2) 0.016(2) 0.018(2)
 C71 0.072(3) 0.055(3) 0.032(2) 0.027(2) 0.021(2) 0.044(3)
 C23 0.039(3) 0.063(3) 0.043(3) 0.020(2) 0.003(2) 0.029(2)
 C53 0.034(2) 0.044(3) 0.036(2) 0.019(2) 0.0194(18) 0.022(2)
 C101 0.045(3) 0.045(3) 0.033(2) 0.008(2) 0.018(2) 0.018(2)
 C48 0.048(3) 0.038(3) 0.067(3) 0.009(2) 0.021(2) 0.030(2)
 C78 0.041(2) 0.052(3) 0.042(3) 0.012(2) 0.007(2) 0.032(2)
 C57 0.039(2) 0.044(3) 0.036(2) 0.012(2) 0.0217(19) 0.013(2)
 C68 0.067(3) 0.067(3) 0.032(2) 0.023(2) 0.022(2) 0.046(3)
 C77 0.050(3) 0.059(3) 0.048(3) 0.020(2) 0.013(2) 0.042(2)
 C32 0.078(4) 0.070(4) 0.047(3) 0.040(3) 0.037(3) 0.054(3)
 C72 0.097(4) 0.072(4) 0.042(3) 0.028(3) 0.041(3) 0.060(4)
 C56 0.048(3) 0.051(3) 0.039(3) 0.018(2) 0.025(2) 0.013(2)
 C97 0.042(3) 0.054(3) 0.027(2) 0.003(2) 0.0123(19) 0.006(2)
 C70 0.075(3) 0.071(3) 0.038(3) 0.037(3) 0.028(2) 0.049(3)
 C59 0.060(3) 0.054(3) 0.061(3) 0.032(3) 0.029(3) 0.031(3)
 C80 0.085(4) 0.061(3) 0.056(3) 0.033(3) 0.037(3) 0.061(3)
 F22 0.122(4) 0.050(2) 0.302(8) -0.051(3) -0.100(5) 0.042(3)
 C26 0.055(3) 0.066(3) 0.043(3) 0.019(2) -0.006(2) 0.024(3)
 C55 0.051(3) 0.060(3) 0.047(3) 0.031(2) 0.029(2) 0.025(3)
 C24 0.045(3) 0.081(4) 0.056(3) 0.029(3) 0.002(2) 0.034(3)
 F031 0.071(5) 0.132(9) 0.040(4) 0.032(5) 0.014(3) 0.018(5)
 F11 0.164(5) 0.099(3) 0.120(4) -0.017(3) 0.091(4) -0.051(3)
 F3 0.118(4) 0.302(8) 0.197(5) 0.167(6) 0.089(4) 0.163(5)
 C50 0.054(3) 0.045(3) 0.081(4) 0.010(3) 0.015(3) 0.030(3)
 C81 0.046(3) 0.057(3) 0.078(4) 0.023(3) 0.015(3) 0.031(3)
 F43A 0.24(2) 0.071(5) 0.093(8) 0.042(5) 0.083(13) 0.002(8)
 C4 0.057(3) 0.051(3) 0.053(3) 0.018(2) 0.009(2) 0.019(3)
 C73 0.084(4) 0.078(4) 0.055(3) 0.041(3) 0.032(3) 0.053(3)
 F6A 0.126(6) 0.176(10) 0.049(3) -0.017(5) -0.011(4) 0.084(7)
 C36 0.074(4) 0.105(5) 0.045(3) 0.049(3) 0.036(3) 0.065(4)
 C69 0.077(4) 0.082(4) 0.031(2) 0.030(3) 0.029(2) 0.058(3)
 C100 0.060(3) 0.062(3) 0.037(3) 0.010(2) 0.025(2) 0.002(3)
 C58 0.087(4) 0.058(4) 0.044(3) 0.015(3) 0.036(3) 0.016(3)
 C35 0.087(4) 0.050(3) 0.051(3) 0.015(3) 0.043(3) 0.015(3)
 F29A 0.100(5) 0.084(6) 0.102(8) 0.069(6) -0.002(5) 0.024(5)
 F12 0.196(6) 0.129(5) 0.112(4) -0.054(4) 0.093(4) -0.090(4)
 F16 0.094(3) 0.128(4) 0.287(7) 0.057(4) 0.091(4) 0.088(3)
 C45 0.042(3) 0.054(3) 0.124(5) 0.033(3) 0.044(3) 0.030(3)
 C6 0.046(3) 0.053(3) 0.055(3) 0.018(2) 0.012(2) 0.020(2)
 C102 0.054(3) 0.067(3) 0.047(3) 0.020(3) 0.025(2) 0.012(3)
 C25 0.054(3) 0.080(4) 0.061(4) 0.025(3) -0.011(3) 0.028(3)
 F18A 0.036(4) 0.141(7) 0.196(10) 0.075(7) 0.027(5) 0.036(4)
 F28A 0.151(11) 0.104(6) 0.058(4) 0.052(4) 0.063(5) 0.047(6)
 C28 0.044(3) 0.132(6) 0.082(5) 0.044(4) 0.017(3) 0.050(4)
 C29 0.071(4) 0.085(4) 0.050(3) 0.016(3) -0.010(3) 0.020(3)
 F30A 0.123(7) 0.130(9) 0.179(12) 0.126(9) 0.096(8) 0.100(7)
 C47 0.062(4) 0.055(3) 0.123(5) 0.024(3) 0.039(3) 0.047(3)
 F17A 0.067(8) 0.206(13) 0.29(2) 0.169(17) 0.115(13) 0.091(9)
 F44A 0.194(14) 0.33(2) 0.109(9) 0.128(13) 0.100(10) 0.213(16)
 C33 0.100(5) 0.061(4) 0.069(4) 0.033(3) 0.061(4) 0.035(4)
 C46 0.052(3) 0.070(4) 0.150(6) 0.044(4) 0.055(4) 0.046(3)
 C5 0.089(5) 0.061(4) 0.087(5) 0.041(3) 0.020(4) 0.026(3)
 C7 0.058(3) 0.074(4) 0.061(4) 0.019(3) 0.007(3) 0.020(3)
 C34 0.112(5) 0.047(3) 0.073(4) 0.014(3) 0.056(4) 0.008(3)
 C51A 0.060(8) 0.098(11) 0.172(11) 0.070(8) 0.055(8) 0.065(9)
 C96 0.069(5) 0.057(5) 0.035(3) 0.003(3) 0.013(3) -0.006(3)
 F10 0.307(11) 0.039(3) 0.399(15) 0.000(5) 0.150(10) 0.029(5)
 C99 0.074(5) 0.056(5) 0.047(4) 0.009(4) 0.016(4) -0.013(4)
 C37 0.196(10) 0.075(6) 0.134(8) 0.001(5) 0.136(8) -0.019(6)
 C98 0.085(5) 0.069(5) 0.046(3) 0.006(3) 0.021(3) -0.017(4)
 F46 0.199(6) 0.139(4) 0.126(5) -0.035(4) -0.086(4) 0.018(5)
 F28 0.086(7) 0.103(9) 0.122(15) 0.081(10) 0.064(9) 0.055(7)
 F29 0.111(10) 0.145(13) 0.094(10) 0.094(10) 0.025(8) 0.060(9)
 F30 0.149(17) 0.053(5) 0.093(8) 0.046(5) 0.070(9) 0.038(7)
 F39 0.063(11) 0.080(13) 0.12(3) 0.036(16) -0.001(13) 0.036(10)
 F37 0.057(11) 0.12(2) 0.062(9) 0.036(10) 0.030(8) 0.025(13)
 F38 0.036(9) 0.057(9) 0.105(17) -0.038(10) -0.016(10) 0.012(8)
 F45A 0.103(12) 0.27(3) 0.067(9) 0.098(15) 0.056(8) 0.110(17)
 F43 0.24(2) 0.058(6) 0.099(13) 0.036(6) 0.134(16) 0.042(9)
 F44 0.040(5) 0.113(11) 0.048(6) 0.022(7) 0.024(4) -0.006(5)
 C96A 0.069(5) 0.057(5) 0.035(3) 0.003(3) 0.013(3) -0.006(3)
 C97A 0.085(5) 0.069(5) 0.046(3) 0.006(3) 0.021(3) -0.017(4)
 C98A 0.074(5) 0.056(5) 0.047(4) 0.009(4) 0.016(4) -0.013(4)
 F48 0.145(4) 0.068(3) 0.072(3) 0.001(2) 0.010(3) -0.035(3)
 F47 0.225(7) 0.100(4) 0.055(3) -0.016(3) 0.050(4) -0.058(4)
 C103 0.136(6) 0.085(5) 0.046(4) 0.008(4) 0.014(4) -0.032(5)
 C1A 0.136(6) 0.085(5) 0.046(4) 0.008(4) 0.014(4) -0.032(5)
 F47A 0.225(7) 0.100(4) 0.055(3) -0.016(3) 0.050(4) -0.058(4)
 F48A 0.145(4) 0.068(3) 0.072(3) 0.001(2) 0.010(3) -0.035(3)
 F4 0.16(3) 0.19(3) 0.081(15) 0.029(19) -0.04(2) 0.11(3)
 F5 0.21(4) 0.075(8) 0.071(14) 0.023(9) 0.02(3) 0.025(14)
 F6 0.102(12) 0.111(19) 0.033(8) 0.015(10) -0.005(8) 0.042(13)
 C51 0.062(12) 0.086(14) 0.21(2) 0.057(12) 0.083(13) 0.045(11)
 F17 0.093(14) 0.185(16) 0.24(3) 0.116(18) 0.128(18) 0.095(13)
 F18 0.045(7) 0.095(11) 0.25(3) 0.059(13) 0.067(13) 0.028(7)

_geom_special_details
;
 All esds (except the esd in the dihedral angle between two l.s. planes)
 are estimated using the full covariance matrix.  The cell esds are taken
 into account individually in the estimation of esds in distances, angles
 and torsion angles; correlations between esds in cell parameters are only
 used when they are defined by crystal symmetry.  An approximate (isotropic)
 treatment of cell esds is used for estimating esds involving l.s. planes.
;
loop_
  _geom_bond_atom_site_label_1
  _geom_bond_atom_site_label_2
  _geom_bond_distance
  _geom_bond_site_symmetry_2
  _geom_bond_publ_flag
 F42 C95 1.340(5) . ?
 N1 C8 1.509(4) . ?
 N1 C15 1.504(4) . ?
 N1 C1 1.440(5) . ?
 F41 C95 1.316(6) . ?
 F31 C80 1.316(5) . ?
 F8 C36 1.281(6) . ?
 F40 C95 1.329(5) . ?
 F19 C58 1.318(7) . ?
 F36 C81 1.320(6) . ?
 F15 C50 1.291(6) . ?
 F32 C80 1.317(6) . ?
 F35 C81 1.328(6) . ?
 F25 C72 1.314(6) . ?
 F24 C59 1.292(6) . ?
 F13 C50 1.307(6) . ?
 F2 C28 1.322(8) . ?
 F34 C81 1.321(6) . ?
 C9 C14 1.375(5) . ?
 C9 C8 1.515(5) . ?
 C9 C10 1.388(5) . ?
 F9 C36 1.327(6) . ?
 C14 C15 1.518(5) . ?
 C14 C13 1.392(5) . ?
 F33 C80 1.335(7) . ?
 C8 C60 1.537(5) . ?
 C8 C82 1.543(5) . ?
 C15 C16 1.546(5) . ?
 C15 C38 1.536(5) . ?
 C83 C84 1.400(5) . ?
 C83 C82 1.397(5) . ?
 C88 C84 1.477(5) . ?
 C88 C89 1.392(6) . ?
 C88 C93 1.396(5) . ?
 F38A C94 1.326(6) . ?
 C16 C21 1.386(5) . ?
 C16 C17 1.381(5) . ?
 C38 C43 1.385(5) . ?
 C38 C39 1.389(5) . ?
 C84 C85 1.393(6) . ?
 F26 C72 1.289(6) . ?
 C60 C65 1.386(5) . ?
 C60 C61 1.386(5) . ?
 C21 C20 1.397(5) . ?
 C85 C86 1.389(6) . ?
 C18 C17 1.398(5) . ?
 C18 C30 1.480(6) . ?
 C18 C19 1.389(6) . ?
 F39A C94 1.301(6) . ?
 C10 C11 1.377(6) . ?
 C13 C12 1.386(6) . ?
 C65 C64 1.400(5) . ?
 C43 C42 1.401(5) . ?
 C82 C87 1.374(5) . ?
 C89 C90 1.383(6) . ?
 C61 C62 1.386(5) . ?
 C41 C42 1.399(6) . ?
 C41 C40 1.380(6) . ?
 C20 C22 1.491(6) . ?
 C20 C19 1.381(6) . ?
 C11 C12 1.378(6) . ?
 C87 C86 1.396(5) . ?
 C42 C44 1.475(6) . ?
 F14 C50 1.366(7) . ?
 C40 C39 1.399(5) . ?
 C40 C52 1.488(6) . ?
 C93 C92 1.388(6) . ?
 C62 C63 1.396(6) . ?
 C62 C66 1.493(5) . ?
 C64 C74 1.495(5) . ?
 C64 C63 1.390(6) . ?
 C90 C91 1.382(6) . ?
 C90 C94 1.504(6) . ?
 C86 C97 1.492(6) . ?
 C92 C95 1.484(6) . ?
 C92 C91 1.396(6) . ?
 C52 C53 1.382(6) . ?
 C52 C57 1.394(6) . ?
 C74 C75 1.395(6) . ?
 C74 C79 1.397(6) . ?
 C1 C3 1.513(6) . ?
 C1 C2 1.504(6) . ?
 F37A C94 1.314(7) . ?
 F7 C36 1.322(7) . ?
 F20 C58 1.366(8) . ?
 F1 C28 1.325(8) . ?
 C22 C27 1.382(6) . ?
 C22 C23 1.384(6) . ?
 C44 C49 1.384(6) . ?
 C44 C45 1.383(6) . ?
 C49 C48 1.390(6) . ?
 C30 C31 1.392(6) . ?
 C30 C35 1.363(7) . ?
 F27 C72 1.317(7) . ?
 C75 C76 1.385(6) . ?
 F5A C29 1.337(9) . ?
 C66 C67 1.386(6) . ?
 C66 C71 1.396(6) . ?
 C76 C77 1.388(7) . ?
 C76 C80 1.495(6) . ?
 F23 C59 1.298(6) . ?
 C79 C78 1.391(6) . ?
 F21 C58 1.271(7) . ?
 C3 C2 1.504(6) . ?
 C3 C6 1.506(6) . ?
 C31 C32 1.382(7) . ?
 C67 C68 1.390(6) . ?
 F4A C29 1.285(10) . ?
 C94 F39 1.228(18) . ?
 C94 F37 1.204(18) . ?
 C94 F38 1.301(16) . ?
 C54 C53 1.397(6) . ?
 C54 C59 1.483(7) . ?
 C54 C55 1.388(6) . ?
 C27 C26 1.417(7) . ?
 C2 C4 1.477(7) . ?
 C71 C70 1.386(6) . ?
 C23 C24 1.390(6) . ?
 C101 C97 1.379(6) . ?
 C101 C100 1.388(7) . ?
 C48 C50 1.477(7) . ?
 C48 C47 1.369(7) . ?
 C78 C77 1.389(7) . ?
 C78 C81 1.507(7) . ?
 C57 C56 1.382(6) . ?
 C68 C72 1.505(7) . ?
 C68 C69 1.381(7) . ?
 C32 C36 1.529(7) . ?
 C32 C33 1.354(8) . ?
 C56 C55 1.369(7) . ?
 C56 C58 1.515(7) . ?
 C97 C96 1.408(8) . ?
 C97 C96A 1.56(4) . ?
 C70 C73 1.489(7) . ?
 C70 C69 1.377(7) . ?
 C59 F22 1.259(7) . ?
 C26 C25 1.356(8) . ?
 C26 C29 1.473(8) . ?
 C24 C25 1.390(8) . ?
 C24 C28 1.488(8) . ?
 F031 C102 1.273(10) . ?
 F11 C37 1.334(11) . ?
 F3 C28 1.315(7) . ?
 F43A C102 1.240(12) . ?
 C4 C5 1.500(8) . ?
 C73 F29A 1.248(9) . ?
 C73 F28A 1.321(9) . ?
 C73 F30A 1.343(8) . ?
 C73 F28 1.427(11) . ?
 C73 F29 1.206(12) . ?
 C73 F30 1.355(12) . ?
 F6A C29 1.342(10) . ?
 C100 C102 1.495(7) . ?
 C100 C99 1.368(9) . ?
 C100 C98A 1.50(4) . ?
 C35 C34 1.395(7) . ?
 F12 C37 1.370(14) . ?
 F16 C51A 1.43(3) . ?
 F16 C51 1.34(4) . ?
 C45 C46 1.403(7) . ?
 C6 C7 1.506(7) . ?
 C102 F44A 1.354(13) . ?
 C102 F45A 1.365(16) . ?
 C102 F43 1.262(15) . ?
 C102 F44 1.260(14) . ?
 F18A C51A 1.34(2) . ?
 F18A F47A 1.76(3) 1_455 ?
 C29 F4 1.44(3) . ?
 C29 F5 1.09(3) . ?
 C29 F6 1.45(3) . ?
 C47 C46 1.371(8) . ?
 F17A C51A 1.24(2) . ?
 C33 C34 1.352(8) . ?
 C46 C51A 1.57(2) . ?
 C46 C51 1.55(3) . ?
 C34 C37 1.511(11) . ?
 C96 C98 1.364(9) . ?
 F10 C37 1.312(17) . ?
 C99 C98 1.404(10) . ?
 C98 C103 1.495(10) . ?
 F46 C103 1.319(12) . ?
 F46 C1A 1.317(19) . ?
 C96A C97A 1.43(4) . ?
 C97A C98A 1.46(5) . ?
 C97A C1A 1.526(19) . ?
 F48 C103 1.334(10) . ?
 F47 C103 1.332(10) . ?
 C1A F47A 1.335(18) . ?
 C1A F48A 1.318(18) . ?
 C51 F17 1.30(5) . ?
 C51 F18 1.36(4) . ?

loop_
  _geom_angle_atom_site_label_1
  _geom_angle_atom_site_label_2
  _geom_angle_atom_site_label_3
  _geom_angle
  _geom_angle_site_symmetry_1
  _geom_angle_site_symmetry_3
  _geom_angle_publ_flag
 C15 N1 C8 110.4(3) . . ?
 C1 N1 C8 117.9(3) . . ?
 C1 N1 C15 116.0(3) . . ?
 C14 C9 C8 111.0(3) . . ?
 C14 C9 C10 120.9(3) . . ?
 C10 C9 C8 128.1(3) . . ?
 C9 C14 C15 111.4(3) . . ?
 C9 C14 C13 120.2(3) . . ?
 C13 C14 C15 128.3(3) . . ?
 N1 C8 C9 101.2(3) . . ?
 N1 C8 C60 110.5(3) . . ?
 N1 C8 C82 114.2(3) . . ?
 C9 C8 C60 106.4(3) . . ?
 C9 C8 C82 110.7(3) . . ?
 C60 C8 C82 113.0(3) . . ?
 N1 C15 C14 101.4(3) . . ?
 N1 C15 C16 111.6(3) . . ?
 N1 C15 C38 111.6(3) . . ?
 C14 C15 C16 112.3(3) . . ?
 C14 C15 C38 107.7(3) . . ?
 C38 C15 C16 111.8(3) . . ?
 C82 C83 C84 121.2(4) . . ?
 C89 C88 C84 119.8(3) . . ?
 C89 C88 C93 118.1(4) . . ?
 C93 C88 C84 122.1(3) . . ?
 C21 C16 C15 119.6(3) . . ?
 C17 C16 C15 121.6(3) . . ?
 C17 C16 C21 118.6(3) . . ?
 C43 C38 C15 120.0(3) . . ?
 C43 C38 C39 118.7(3) . . ?
 C39 C38 C15 121.0(3) . . ?
 C83 C84 C88 119.2(3) . . ?
 C85 C84 C83 119.1(3) . . ?
 C85 C84 C88 121.7(3) . . ?
 C65 C60 C8 124.7(3) . . ?
 C65 C60 C61 118.4(3) . . ?
 C61 C60 C8 116.6(3) . . ?
 C16 C21 C20 121.2(4) . . ?
 C86 C85 C84 120.7(3) . . ?
 C17 C18 C30 121.2(4) . . ?
 C19 C18 C17 119.0(4) . . ?
 C19 C18 C30 119.9(3) . . ?
 C11 C10 C9 118.8(4) . . ?
 C12 C13 C14 118.5(3) . . ?
 C60 C65 C64 120.8(3) . . ?
 C38 C43 C42 121.5(4) . . ?
 C83 C82 C8 121.3(3) . . ?
 C87 C82 C8 120.9(3) . . ?
 C87 C82 C83 117.8(3) . . ?
 C90 C89 C88 121.2(4) . . ?
 C62 C61 C60 122.0(4) . . ?
 C16 C17 C18 121.3(4) . . ?
 C40 C41 C42 121.1(3) . . ?
 C21 C20 C22 120.2(4) . . ?
 C19 C20 C21 119.1(4) . . ?
 C19 C20 C22 120.7(4) . . ?
 C10 C11 C12 120.5(4) . . ?
 C11 C12 C13 120.9(4) . . ?
 C82 C87 C86 122.8(4) . . ?
 C43 C42 C44 120.3(4) . . ?
 C41 C42 C43 118.4(4) . . ?
 C41 C42 C44 121.3(3) . . ?
 C41 C40 C39 119.2(4) . . ?
 C41 C40 C52 121.1(3) . . ?
 C39 C40 C52 119.8(4) . . ?
 C92 C93 C88 120.8(4) . . ?
 C38 C39 C40 121.2(4) . . ?
 C61 C62 C63 119.0(3) . . ?
 C61 C62 C66 119.4(3) . . ?
 C63 C62 C66 121.6(3) . . ?
 C65 C64 C74 120.4(3) . . ?
 C63 C64 C65 119.6(4) . . ?
 C63 C64 C74 120.0(3) . . ?
 C89 C90 C94 119.5(4) . . ?
 C91 C90 C89 120.4(4) . . ?
 C91 C90 C94 120.0(4) . . ?
 C85 C86 C87 118.4(4) . . ?
 C85 C86 C97 122.8(3) . . ?
 C87 C86 C97 118.8(4) . . ?
 C93 C92 C95 121.0(4) . . ?
 C93 C92 C91 120.2(4) . . ?
 C91 C92 C95 118.8(4) . . ?
 C53 C52 C40 120.4(4) . . ?
 C53 C52 C57 118.6(4) . . ?
 C57 C52 C40 120.9(4) . . ?
 C75 C74 C64 120.7(4) . . ?
 C75 C74 C79 118.8(4) . . ?
 C79 C74 C64 120.5(4) . . ?
 N1 C1 C3 121.6(3) . . ?
 N1 C1 C2 122.6(3) . . ?
 C2 C1 C3 59.8(3) . . ?
 C64 C63 C62 120.1(4) . . ?
 C27 C22 C20 120.0(4) . . ?
 C27 C22 C23 119.3(4) . . ?
 C23 C22 C20 120.6(4) . . ?
 F42 C95 C92 112.3(4) . . ?
 F41 C95 F42 105.8(4) . . ?
 F41 C95 F40 108.0(4) . . ?
 F41 C95 C92 113.0(4) . . ?
 F40 C95 F42 104.7(4) . . ?
 F40 C95 C92 112.5(4) . . ?
 C49 C44 C42 120.6(4) . . ?
 C45 C44 C42 121.6(4) . . ?
 C45 C44 C49 117.7(4) . . ?
 C44 C49 C48 121.7(4) . . ?
 C31 C30 C18 121.0(4) . . ?
 C35 C30 C18 120.7(4) . . ?
 C35 C30 C31 118.3(4) . . ?
 C76 C75 C74 120.0(4) . . ?
 C67 C66 C62 120.4(4) . . ?
 C67 C66 C71 118.4(4) . . ?
 C71 C66 C62 121.2(4) . . ?
 C75 C76 C77 121.3(4) . . ?
 C75 C76 C80 119.4(4) . . ?
 C77 C76 C80 119.3(4) . . ?
 C90 C91 C92 119.2(4) . . ?
 C78 C79 C74 120.6(4) . . ?
 C20 C19 C18 120.7(4) . . ?
 C2 C3 C1 59.8(3) . . ?
 C2 C3 C6 120.8(4) . . ?
 C6 C3 C1 122.3(4) . . ?
 C32 C31 C30 120.4(5) . . ?
 C66 C67 C68 121.3(4) . . ?
 F38A C94 C90 113.7(4) . . ?
 F39A C94 F38A 105.0(6) . . ?
 F39A C94 C90 113.2(4) . . ?
 F39A C94 F37A 109.3(6) . . ?
 F37A C94 F38A 103.2(5) . . ?
 F37A C94 C90 111.7(4) . . ?
 F39 C94 C90 110.6(10) . . ?
 F39 C94 F38 110.6(17) . . ?
 F37 C94 C90 113.5(10) . . ?
 F37 C94 F39 104.8(19) . . ?
 F37 C94 F38 106.5(19) . . ?
 F38 C94 C90 110.7(8) . . ?
 C53 C54 C59 119.1(4) . . ?
 C55 C54 C53 119.8(4) . . ?
 C55 C54 C59 121.1(4) . . ?
 C22 C27 C26 119.8(5) . . ?
 C1 C2 C3 60.4(3) . . ?
 C4 C2 C1 129.5(4) . . ?
 C4 C2 C3 123.0(4) . . ?
 C70 C71 C66 120.1(4) . . ?
 C22 C23 C24 120.8(5) . . ?
 C52 C53 C54 120.9(4) . . ?
 C97 C101 C100 121.5(4) . . ?
 C49 C48 C50 119.7(4) . . ?
 C47 C48 C49 120.3(5) . . ?
 C47 C48 C50 120.0(4) . . ?
 C79 C78 C81 119.8(4) . . ?
 C77 C78 C79 120.3(4) . . ?
 C77 C78 C81 119.9(4) . . ?
 C56 C57 C52 120.1(4) . . ?
 C67 C68 C72 120.9(4) . . ?
 C69 C68 C67 119.5(4) . . ?
 C69 C68 C72 119.5(4) . . ?
 C76 C77 C78 118.9(4) . . ?
 C31 C32 C36 117.4(5) . . ?
 C33 C32 C31 120.8(5) . . ?
 C33 C32 C36 121.8(5) . . ?
 F25 C72 F27 107.4(5) . . ?
 F25 C72 C68 111.5(5) . . ?
 F26 C72 F25 105.6(4) . . ?
 F26 C72 F27 105.8(6) . . ?
 F26 C72 C68 112.6(4) . . ?
 F27 C72 C68 113.4(4) . . ?
 C57 C56 C58 120.6(5) . . ?
 C55 C56 C57 121.5(4) . . ?
 C55 C56 C58 117.9(4) . . ?
 C86 C97 C96A 109.0(13) . . ?
 C101 C97 C86 123.1(4) . . ?
 C101 C97 C96 116.5(5) . . ?
 C101 C97 C96A 115.5(12) . . ?
 C96 C97 C86 120.2(4) . . ?
 C71 C70 C73 119.6(5) . . ?
 C69 C70 C71 120.8(4) . . ?
 C69 C70 C73 119.6(4) . . ?
 F24 C59 F23 104.7(5) . . ?
 F24 C59 C54 113.9(4) . . ?
 F23 C59 C54 114.7(5) . . ?
 F22 C59 F24 106.5(6) . . ?
 F22 C59 F23 104.1(6) . . ?
 F22 C59 C54 112.1(4) . . ?
 F31 C80 F32 107.4(4) . . ?
 F31 C80 F33 106.0(5) . . ?
 F31 C80 C76 113.4(4) . . ?
 F32 C80 F33 104.9(4) . . ?
 F32 C80 C76 112.5(5) . . ?
 F33 C80 C76 111.9(4) . . ?
 C27 C26 C29 119.3(5) . . ?
 C25 C26 C27 120.0(5) . . ?
 C25 C26 C29 120.7(5) . . ?
 C56 C55 C54 119.1(4) . . ?
 C23 C24 C28 121.1(5) . . ?
 C25 C24 C23 119.4(5) . . ?
 C25 C24 C28 119.4(5) . . ?
 F15 C50 F13 107.4(4) . . ?
 F15 C50 F14 103.8(5) . . ?
 F15 C50 C48 115.8(4) . . ?
 F13 C50 F14 103.5(5) . . ?
 F13 C50 C48 113.4(5) . . ?
 F14 C50 C48 111.8(4) . . ?
 F36 C81 F35 106.0(5) . . ?
 F36 C81 F34 107.1(5) . . ?
 F36 C81 C78 112.2(4) . . ?
 F35 C81 C78 112.6(4) . . ?
 F34 C81 F35 106.4(5) . . ?
 F34 C81 C78 112.1(4) . . ?
 C2 C4 C5 110.5(4) . . ?
 F29A C73 C70 111.1(5) . . ?
 F29A C73 F28A 111.8(8) . . ?
 F29A C73 F30A 109.9(9) . . ?
 F28A C73 C70 112.4(6) . . ?
 F28A C73 F30A 100.8(8) . . ?
 F30A C73 C70 110.4(6) . . ?
 F28 C73 C70 113.8(5) . . ?
 F29 C73 C70 117.7(9) . . ?
 F29 C73 F28 99.3(10) . . ?
 F29 C73 F30 103.9(12) . . ?
 F30 C73 C70 116.7(6) . . ?
 F30 C73 F28 103.1(10) . . ?
 F8 C36 F9 107.9(4) . . ?
 F8 C36 F7 107.3(6) . . ?
 F8 C36 C32 113.1(4) . . ?
 F9 C36 C32 111.3(5) . . ?
 F7 C36 F9 105.9(4) . . ?
 F7 C36 C32 110.9(4) . . ?
 C70 C69 C68 119.8(4) . . ?
 C101 C100 C102 120.4(5) . . ?
 C101 C100 C98A 112.3(14) . . ?
 C102 C100 C98A 114.5(15) . . ?
 C99 C100 C101 121.1(5) . . ?
 C99 C100 C102 118.3(5) . . ?
 F19 C58 F20 105.6(5) . . ?
 F19 C58 C56 113.2(5) . . ?
 F20 C58 C56 110.3(5) . . ?
 F21 C58 F19 107.3(6) . . ?
 F21 C58 F20 107.7(6) . . ?
 F21 C58 C56 112.3(5) . . ?
 C30 C35 C34 119.9(5) . . ?
 C44 C45 C46 120.3(5) . . ?
 C3 C6 C7 110.7(4) . . ?
 F031 C102 C100 112.4(6) . . ?
 F031 C102 F44A 102.4(10) . . ?
 F43A C102 F031 112.0(11) . . ?
 F43A C102 C100 110.9(8) . . ?
 F43A C102 F44A 108.2(11) . . ?
 F44A C102 C100 110.7(8) . . ?
 F45A C102 C100 113.4(7) . . ?
 F43 C102 C100 111.4(8) . . ?
 F43 C102 F45A 106.6(14) . . ?
 F44 C102 C100 115.4(9) . . ?
 F44 C102 F45A 102.1(13) . . ?
 F44 C102 F43 107.2(12) . . ?
 C26 C25 C24 120.7(5) . . ?
 C51A F18A F47A 82.3(12) . 1_455 ?
 F2 C28 F1 106.2(6) . . ?
 F2 C28 C24 114.2(5) . . ?
 F1 C28 C24 112.7(6) . . ?
 F3 C28 F2 108.5(7) . . ?
 F3 C28 F1 103.6(5) . . ?
 F3 C28 C24 111.0(5) . . ?
 F5A C29 C26 112.9(6) . . ?
 F5A C29 F6A 101.5(8) . . ?
 F4A C29 F5A 108.7(6) . . ?
 F4A C29 C26 113.4(7) . . ?
 F4A C29 F6A 106.8(8) . . ?
 F6A C29 C26 112.7(6) . . ?
 F4 C29 C26 111.6(19) . . ?
 F4 C29 F6 93(2) . . ?
 F5 C29 C26 121.8(17) . . ?
 F5 C29 F4 118(3) . . ?
 F5 C29 F6 93(3) . . ?
 F6 C29 C26 113.8(9) . . ?
 C48 C47 C46 119.0(5) . . ?
 C34 C33 C32 119.0(5) . . ?
 C45 C46 C51A 116.1(10) . . ?
 C45 C46 C51 115.7(15) . . ?
 C47 C46 C45 121.0(5) . . ?
 C47 C46 C51A 121.5(9) . . ?
 C47 C46 C51 120.6(12) . . ?
 C35 C34 C37 118.6(5) . . ?
 C33 C34 C35 121.5(6) . . ?
 C33 C34 C37 119.8(6) . . ?
 F16 C51A C46 103.6(18) . . ?
 F18A C51A F16 113.4(11) . . ?
 F18A C51A C46 115.7(14) . . ?
 F17A C51A F16 106.2(18) . . ?
 F17A C51A F18A 105(3) . . ?
 F17A C51A C46 112.7(13) . . ?
 C98 C96 C97 121.7(6) . . ?
 C100 C99 C98 117.9(6) . . ?
 F11 C37 F12 102.9(12) . . ?
 F11 C37 C34 110.8(7) . . ?
 F12 C37 C34 111.0(7) . . ?
 F10 C37 F11 109.1(8) . . ?
 F10 C37 F12 110.5(8) . . ?
 F10 C37 C34 112.1(13) . . ?
 C96 C98 C99 120.7(6) . . ?
 C96 C98 C103 119.9(6) . . ?
 C99 C98 C103 119.4(6) . . ?
 C97A C96A C97 118(3) . . ?
 C96A C97A C98A 114(2) . . ?
 C96A C97A C1A 122(3) . . ?
 C98A C97A C1A 123(3) . . ?
 C97A C98A C100 124(3) . . ?
 F46 C103 C98 110.4(9) . . ?
 F46 C103 F48 108.0(8) . . ?
 F46 C103 F47 102.5(8) . . ?
 F48 C103 C98 113.9(7) . . ?
 F47 C103 C98 113.0(7) . . ?
 F47 C103 F48 108.3(9) . . ?
 F46 C1A C97A 99(2) . . ?
 F46 C1A F47A 99.2(16) . . ?
 F46 C1A F48A 92.4(15) . . ?
 F47A C1A C97A 126(2) . . ?
 F48A C1A C97A 121(2) . . ?
 F48A C1A F47A 107.9(18) . . ?
 C1A F47A F18A 118.3(19) . 1_655 ?
 F16 C51 C46 109(3) . . ?
 F16 C51 F18 95(3) . . ?
 F17 C51 F16 116(3) . . ?
 F17 C51 C46 122(3) . . ?
 F17 C51 F18 112(3) . . ?
 F18 C51 C46 99(3) . . ?

_shelx_res_file
;
TITL GB_RJ_RN_20180329_0m_a.res in P-1
    gb_rj_rn_20180329_0m_a_sq_sq.res
    created by SHELXL-2016/6 at 11:43:42 on 09-Apr-2018
REM Old TITL GB_RJ_RN_20180329_0m in P-1
REM SHELXT solution in P-1
REM R1 0.396, Rweak 0.058, Alpha 0.109, Orientation as input
REM Formula found by SHELXT: C145 N19
CELL 0.71073 14.9856 15.4379 27.5452 104.149 92.482 117.017
ZERR 2 0.0009 0.0009 0.0016 0.001 0.001 0.001
LATT 1
SFAC C H F N
UNIT 206 106 96 2
DFIX 2.11 F46 F48A
DFIX 2.11 F48A F47A
DFIX 2.11 F47A F46
DFIX 1.32 F46 C1A F48A C1A F47A C1A F47 C103 F48 C103 F46 C103
DFIX 1.5 C103 C98 C1A C97A
RIGU F28A F29A C73 F30A
RIGU F28 C73 F29 F30
RIGU F39 C94 F37 F38
RIGU F38A C94 F37A F39A
RIGU F031 C102 F44A F43A
RIGU F45A C102 F43 F44
RIGU C98 C103 F48 F47 F46
RIGU F46 F48A F47A C1A C97A
RIGU 0.02 0.02 C100 C98A C97A C96A C97 C1A F48A F46 F47A
RIGU 0.02 0.02 C97 C96 C98 C99 C100 C103 F48 F47 F46
RIGU F5A C29 F6A F4A C26
RIGU F5 F6 C29 F4 C26
RIGU F17 C51 F18 F16 C46
RIGU F17A C51A F18A F16 C46
EADP C96 C96A
EADP C98 C97A
EADP C99 C98A
EADP C1A C103
EADP F48 F48A
EADP F47 F47A

L.S. 10 0 128
PLAN  20
SIZE 0.02 0.032 0.25
TEMP -173.15
ABIN
fmap 2
acta
REM <olex2.extras>
REM <HklSrc "%.\\GB_RJ_RN_20180329_0m_a_sq_sq.hkl">
REM </olex2.extras>

WGHT    0.128800   10.928201
FVAR       0.23509   0.60853   0.79947   0.58400   0.18705   0.79484   0.61175
F42   3    0.575705   -0.169980    0.451711    11.00000    0.08420    0.07890 =
         0.04124   -0.00277    0.01943    0.05709
N1    4    0.431764    0.236769    0.756802    11.00000    0.02813    0.02353 =
         0.01945    0.00821    0.00726    0.01626
F41   3    0.709230   -0.043373    0.498740    11.00000    0.05569    0.06346 =
         0.10401   -0.00627    0.04938    0.02549
F31   3    0.641573   -0.210158    0.854963    11.00000    0.13194    0.08504 =
         0.08195    0.05885    0.07195    0.08514
F8    3    0.655294    0.392734    0.484928    11.00000    0.09510    0.08348 =
         0.05369    0.02664    0.03492    0.05764
F40   3    0.636241   -0.181452    0.519132    11.00000    0.11004    0.11332 =
         0.07325    0.03924    0.04044    0.09546
F19   3    0.160274    0.290168    1.038993    11.00000    0.11091    0.07947 =
         0.04392    0.01087    0.03672    0.04339
F36   3    0.983563    0.200381    0.782820    11.00000    0.05486    0.06560 =
         0.12564    0.02814    0.03400    0.02274
F15   3    0.326016    0.846146    0.852050    11.00000    0.07892    0.05150 =
         0.12784    0.03106    0.00368    0.03778
F32   3    0.766650   -0.215121    0.823582    11.00000    0.11310    0.10421 =
         0.14133    0.08415    0.07507    0.09411
F35   3    0.933919    0.074006    0.717157    11.00000    0.06585    0.11217 =
         0.07658    0.03104    0.03604    0.03594
F25   3    0.403139    0.376646    1.026978    11.00000    0.11495    0.09215 =
         0.09269   -0.01414   -0.02335    0.08158
F24   3    0.167143   -0.095286    0.845457    11.00000    0.12331    0.06345 =
         0.12512    0.02126    0.08304    0.04939
F13   3    0.431590    0.822734    0.891644    11.00000    0.07999    0.05506 =
         0.15541    0.03949   -0.04064    0.01176
F2    3   -0.047883    0.266893    0.686855    11.00000    0.05952    0.15467 =
         0.09253    0.02076    0.02413    0.06065
F34   3    1.013730    0.079115    0.784183    11.00000    0.05051    0.12474 =
         0.15466    0.07256    0.02661    0.05784
C9    1    0.593358    0.368643    0.798392    11.00000    0.02963    0.03438 =
         0.01357    0.00976    0.01082    0.02018
F9    3    0.707011    0.539837    0.477389    11.00000    0.17153    0.11483 =
         0.07800    0.07181    0.08841    0.08748
C14   1    0.530379    0.411233    0.797798    11.00000    0.02635    0.03328 =
         0.01615    0.01369    0.01307    0.01708
F33   3    0.627070   -0.271439    0.775607    11.00000    0.15228    0.04663 =
         0.07925    0.02387    0.02134    0.03784
C8    1    0.541244    0.259139    0.764820    11.00000    0.02695    0.03181 =
         0.01833    0.00970    0.01011    0.02050
C15   1    0.426125    0.334171    0.766121    11.00000    0.02634    0.02890 =
         0.02085    0.01249    0.01086    0.01619
C83   1    0.548757    0.156306    0.678100    11.00000    0.02512    0.03789 =
         0.02482    0.01314    0.01000    0.02080
AFIX  43
H83   2    0.497557    0.096630    0.683864    11.00000   -1.20000
AFIX   0
C88   1    0.541099    0.048949    0.592978    11.00000    0.02810    0.03867 =
         0.01896    0.00915    0.00831    0.01970
PART 1
F38A  3    0.230246   -0.132639    0.563894    31.00000    0.03082    0.06900 =
         0.09712   -0.02193    0.01813    0.01376
PART 0
C16   1    0.408144    0.355904    0.715715    11.00000    0.03209    0.03000 =
         0.02147    0.01138    0.01235    0.02143
C38   1    0.346127    0.334861    0.799038    11.00000    0.02450    0.03264 =
         0.01966    0.00950    0.00731    0.01508
C84   1    0.585992    0.148764    0.632381    11.00000    0.02603    0.03928 =
         0.01920    0.00647    0.00743    0.02068
F26   3    0.511639    0.381529    1.078458    11.00000    0.16353    0.12846 =
         0.04588   -0.00700   -0.00630    0.11058
C60   1    0.555497    0.196380    0.797004    11.00000    0.03734    0.03111 =
         0.02045    0.00812    0.00675    0.02189
C21   1    0.310037    0.310364    0.688671    11.00000    0.03010    0.03722 =
         0.02769    0.01545    0.00932    0.02091
AFIX  43
H21   2    0.254134    0.273168    0.703402    11.00000   -1.20000
AFIX   0
C85   1    0.664605    0.235725    0.625241    11.00000    0.02464    0.04650 =
         0.02001    0.00709    0.01201    0.02001
AFIX  43
H85   2    0.691423    0.231043    0.594655    11.00000   -1.20000
AFIX   0
C18   1    0.472096    0.422291    0.646143    11.00000    0.04142    0.03525 =
         0.02856    0.01796    0.01759    0.02129
PART 1
F39A  3    0.236381   -0.210916    0.491941    31.00000    0.03766    0.13945 =
         0.03355    0.00372    0.00248    0.00410
PART 0
C10   1    0.690727    0.424476    0.827231    11.00000    0.03371    0.04361 =
         0.02286    0.00921    0.00967    0.02531
AFIX  43
H10   2    0.733336    0.394196    0.828160    11.00000   -1.20000
AFIX   0
C13   1    0.564686    0.512542    0.825126    11.00000    0.03275    0.03278 =
         0.02429    0.01054    0.01078    0.02000
AFIX  43
H13   2    0.521956    0.542774    0.824526    11.00000   -1.20000
AFIX   0
C65   1    0.612203    0.145924    0.786920    11.00000    0.03791    0.03466 =
         0.02216    0.01003    0.01016    0.02295
AFIX  43
H65   2    0.642292    0.145876    0.757264    11.00000   -1.20000
AFIX   0
C43   1    0.316586    0.409089    0.804071    11.00000    0.02468    0.02924 =
         0.03251    0.01123    0.00782    0.01314
AFIX  43
H43   2    0.339341    0.453679    0.783570    11.00000   -1.20000
AFIX   0
C82   1    0.585491    0.249949    0.715401    11.00000    0.03023    0.03294 =
         0.01655    0.00948    0.00727    0.02051
C89   1    0.436512   -0.015670    0.583893    11.00000    0.03850    0.04096 =
         0.01908    0.00821    0.00970    0.02148
AFIX  43
H89   2    0.394639    0.005960    0.602500    11.00000   -1.20000
AFIX   0
C61   1    0.517397    0.200251    0.841999    11.00000    0.03882    0.03831 =
         0.02350    0.01188    0.01092    0.02584
AFIX  43
H61   2    0.482224    0.238358    0.850289    11.00000   -1.20000
AFIX   0
C17   1    0.488178    0.413399    0.694669    11.00000    0.03183    0.03511 =
         0.02660    0.01191    0.01072    0.02061
AFIX  43
H17   2    0.555477    0.447578    0.713525    11.00000   -1.20000
AFIX   0
C41   1    0.218344    0.351363    0.867274    11.00000    0.03219    0.04020 =
         0.03521    0.01000    0.02053    0.02239
AFIX  43
H41   2    0.175054    0.357119    0.890611    11.00000   -1.20000
AFIX   0
C20   1    0.291812    0.318137    0.640137    11.00000    0.03969    0.04207 =
         0.03174    0.01362    0.00963    0.02882
C11   1    0.724509    0.524567    0.854485    11.00000    0.03198    0.04189 =
         0.01974    0.00445    0.00402    0.01719
AFIX  43
H11   2    0.791080    0.563755    0.874315    11.00000   -1.20000
AFIX   0
C12   1    0.662562    0.568319    0.853228    11.00000    0.03873    0.03173 =
         0.02880    0.00865    0.01166    0.01657
AFIX  43
H12   2    0.687284    0.637700    0.871886    11.00000   -1.20000
AFIX   0
C87   1    0.661575    0.334186    0.706420    11.00000    0.03186    0.03383 =
         0.01881    0.00622    0.00954    0.01653
AFIX  43
H87   2    0.686257    0.398538    0.731203    11.00000   -1.20000
AFIX   0
C42   1    0.253929    0.419954    0.838688    11.00000    0.02826    0.03342 =
         0.03464    0.00809    0.01095    0.01622
F14   3    0.403219    0.776886    0.811738    11.00000    0.12224    0.05485 =
         0.14175    0.02414    0.06827    0.01654
C40   1    0.245111    0.275457    0.862122    11.00000    0.02636    0.03727 =
         0.02882    0.01078    0.01187    0.01107
C93   1    0.600591    0.015565    0.564669    11.00000    0.03001    0.03934 =
         0.02392    0.00770    0.00786    0.01780
AFIX  43
H93   2    0.672044    0.058706    0.569950    11.00000   -1.20000
AFIX   0
C39   1    0.309766    0.268116    0.828093    11.00000    0.03035    0.03455 =
         0.02788    0.01184    0.01133    0.02101
AFIX  43
H39   2    0.329153    0.216583    0.824792    11.00000   -1.20000
AFIX   0
C62   1    0.529050    0.150224    0.875260    11.00000    0.04559    0.03890 =
         0.02162    0.01085    0.01018    0.02723
C64   1    0.625675    0.095032    0.819903    11.00000    0.04468    0.03855 =
         0.02573    0.00946    0.00821    0.02862
C90   1    0.392423   -0.110772    0.548283    11.00000    0.03855    0.04191 =
         0.02318    0.00851    0.00590    0.01938
C86   1    0.704163    0.329199    0.662393    11.00000    0.03214    0.04050 =
         0.02194    0.00884    0.00979    0.01448
C92   1    0.556691   -0.079811    0.528924    11.00000    0.04805    0.04456 =
         0.02556    0.01069    0.01430    0.02965
C52   1    0.206375    0.201802    0.892141    11.00000    0.02762    0.03861 =
         0.03282    0.01342    0.01507    0.01379
C74   1    0.690812    0.044867    0.809907    11.00000    0.04358    0.03973 =
         0.02568    0.00973    0.00487    0.03023
C1    1    0.363239    0.154589    0.713161    11.00000    0.03269    0.03112 =
         0.02419    0.00898    0.01211    0.01627
AFIX  13
H1    2    0.377886    0.167694    0.679830    11.00000   -1.20000
AFIX   0
PART 1
F37A  3    0.255067   -0.256055    0.557242    31.00000    0.05163    0.07287 =
         0.15256    0.06787    0.02467    0.01497
PART 0
F7    3    0.549344    0.438987    0.467281    11.00000    0.12525    0.27582 =
         0.04359    0.05884    0.03715    0.14302
F20   3    0.212520    0.191458    1.056343    11.00000    0.21651    0.12669 =
         0.04013    0.02802    0.03346    0.10082
F1    3   -0.152568    0.130709    0.630652    11.00000    0.05320    0.17272 =
         0.10283    0.04182    0.02005    0.01782
C63   1    0.582364    0.095816    0.863512    11.00000    0.05507    0.04470 =
         0.02861    0.01899    0.01131    0.03348
AFIX  43
H63   2    0.589062    0.059267    0.885351    11.00000   -1.20000
AFIX   0
C22   1    0.185530    0.268140    0.611787    11.00000    0.03986    0.04919 =
         0.03180    0.01624    0.00156    0.02663
C95   1    0.620151   -0.117297    0.500308    11.00000    0.05518    0.04651 =
         0.04167    0.00692    0.01584    0.03418
C44   1    0.227238    0.502498    0.844791    11.00000    0.03534    0.03688 =
         0.05090    0.01291    0.01911    0.01950
C49   1    0.299690    0.599310    0.845892    11.00000    0.03001    0.04303 =
         0.04566    0.01114    0.01309    0.02076
AFIX  43
H49   2    0.366846    0.611880    0.842143    11.00000   -1.20000
AFIX   0
C30   1    0.558053    0.483869    0.623644    11.00000    0.04940    0.04123 =
         0.03278    0.01836    0.01535    0.02181
F27   3    0.558380    0.443024    1.019094    11.00000    0.17201    0.06876 =
         0.13130    0.00416    0.09882    0.04653
C75   1    0.661696   -0.049519    0.817819    11.00000    0.05188    0.04327 =
         0.02504    0.01468    0.01187    0.03208
AFIX  43
H75   2    0.599129   -0.083305    0.828895    11.00000   -1.20000
AFIX   0
PART 1
F5A   3   -0.052594    0.058375    0.459333    61.00000    0.07337    0.11113 =
         0.04603    0.01190   -0.02035   -0.00909
PART 0
C66   1    0.488722    0.159691    0.923794    11.00000    0.04744    0.05105 =
         0.02606    0.01957    0.01296    0.03612
C76   1    0.724005   -0.093963    0.809526    11.00000    0.06375    0.04824 =
         0.03679    0.02000    0.01488    0.04418
F23   3    0.085776   -0.135730    0.901585    11.00000    0.28573    0.08261 =
         0.12706    0.07302    0.13840    0.11037
C91   1    0.451777   -0.143993    0.520792    11.00000    0.04516    0.03617 =
         0.02799    0.00731    0.00810    0.02102
AFIX  43
H91   2    0.421560   -0.209685    0.496661    11.00000   -1.20000
AFIX   0
C79   1    0.782781    0.092534    0.793238    11.00000    0.04290    0.04123 =
         0.03964    0.01474    0.00357    0.02548
AFIX  43
H79   2    0.802908    0.156245    0.787129    11.00000   -1.20000
AFIX   0
C19   1    0.373386    0.372741    0.619030    11.00000    0.04905    0.04646 =
         0.02270    0.01751    0.01258    0.03079
AFIX  43
H19   2    0.361826    0.376436    0.585591    11.00000   -1.20000
AFIX   0
F21   3    0.055330    0.139032    1.031005    11.00000    0.18458    0.10367 =
         0.09834   -0.01713    0.11602   -0.03963
C3    1    0.251257    0.092143    0.713966    11.00000    0.03495    0.03692 =
         0.03295    0.00761    0.01193    0.01039
AFIX  13
H3    2    0.231698    0.107422    0.748022    11.00000   -1.20000
AFIX   0
C31   1    0.561128    0.450712    0.572298    11.00000    0.05622    0.05383 =
         0.03673    0.02817    0.02106    0.03595
AFIX  43
H31   2    0.508957    0.386358    0.551576    11.00000   -1.20000
AFIX   0
C67   1    0.501781    0.253176    0.952638    11.00000    0.06099    0.05480 =
         0.02783    0.02027    0.01677    0.03933
AFIX  43
H67   2    0.535575    0.311024    0.940917    11.00000   -1.20000
AFIX   0
PART 1
F4A   3    0.062237    0.199156    0.452798    61.00000    0.14372    0.08902 =
         0.04254    0.02880   -0.00422   -0.00049
PART 0
C94   1    0.279090   -0.178089    0.539514    11.00000    0.04378    0.04591 =
         0.03602    0.00363    0.01040    0.01709
C54   1    0.138868    0.030068    0.897546    11.00000    0.04199    0.04538 =
         0.04935    0.02200    0.02311    0.02476
C27   1    0.164665    0.223909    0.559695    11.00000    0.05174    0.05861 =
         0.03688    0.01855    0.00258    0.02692
AFIX  43
H27   2    0.217779    0.224345    0.541965    11.00000   -1.20000
AFIX   0
C2    1    0.319687    0.044541    0.711270    11.00000    0.04488    0.03049 =
         0.04763    0.00840    0.01560    0.01782
AFIX  13
H2    2    0.310077    0.000348    0.676105    11.00000   -1.20000
AFIX   0
C71   1    0.436826    0.075196    0.941136    11.00000    0.07193    0.05481 =
         0.03175    0.02659    0.02121    0.04354
AFIX  43
H71   2    0.426746    0.010305    0.921948    11.00000   -1.20000
AFIX   0
C23   1    0.107226    0.266923    0.637000    11.00000    0.03882    0.06258 =
         0.04337    0.02044    0.00327    0.02856
AFIX  43
H23   2    0.121347    0.297706    0.672758    11.00000   -1.20000
AFIX   0
C53   1    0.178239    0.100417    0.870182    11.00000    0.03360    0.04382 =
         0.03614    0.01942    0.01938    0.02176
AFIX  43
H53   2    0.185764    0.078235    0.836014    11.00000   -1.20000
AFIX   0
C101  1    0.820924    0.434755    0.611961    11.00000    0.04475    0.04531 =
         0.03271    0.00805    0.01839    0.01783
AFIX  43
H101  2    0.781958    0.381932    0.581439    11.00000   -1.20000
AFIX   0
C48   1    0.276729    0.678633    0.852344    11.00000    0.04794    0.03797 =
         0.06750    0.00915    0.02089    0.02964
C78   1    0.845207    0.047633    0.785493    11.00000    0.04122    0.05185 =
         0.04218    0.01195    0.00724    0.03165
C57   1    0.195503    0.232893    0.942457    11.00000    0.03867    0.04403 =
         0.03591    0.01151    0.02171    0.01349
AFIX  43
H57   2    0.214420    0.302263    0.958278    11.00000   -1.20000
AFIX   0
C68   1    0.466380    0.263898    0.998382    11.00000    0.06693    0.06743 =
         0.03162    0.02295    0.02215    0.04638
C77   1    0.816061   -0.046168    0.793562    11.00000    0.05043    0.05859 =
         0.04783    0.01964    0.01287    0.04237
AFIX  43
H77   2    0.858426   -0.077130    0.788245    11.00000   -1.20000
AFIX   0
C32   1    0.639635    0.510857    0.551275    11.00000    0.07784    0.06985 =
         0.04734    0.03965    0.03727    0.05376
C72   1    0.485395    0.366567    1.030727    11.00000    0.09691    0.07216 =
         0.04249    0.02839    0.04130    0.06003
C56   1    0.157243    0.162924    0.969350    11.00000    0.04798    0.05092 =
         0.03872    0.01784    0.02544    0.01334
C97   1    0.791729    0.423443    0.657787    11.00000    0.04236    0.05379 =
         0.02709    0.00349    0.01235    0.00563
C70   1    0.400003    0.085828    0.986284    11.00000    0.07521    0.07058 =
         0.03817    0.03653    0.02800    0.04879
C59   1    0.103629   -0.079055    0.871483    11.00000    0.05997    0.05407 =
         0.06120    0.03231    0.02930    0.03097
C80   1    0.690256   -0.196574    0.816575    11.00000    0.08514    0.06139 =
         0.05634    0.03308    0.03717    0.06101
F22   3    0.020618   -0.119864    0.841085    11.00000    0.12237    0.05000 =
         0.30223   -0.05078   -0.10011    0.04186
C26   1    0.063826    0.177935    0.532842    11.00000    0.05483    0.06574 =
         0.04283    0.01942   -0.00602    0.02421
C55   1    0.129395    0.062413    0.947768    11.00000    0.05092    0.06007 =
         0.04673    0.03073    0.02904    0.02542
AFIX  43
H55   2    0.103931    0.015434    0.966909    11.00000   -1.20000
AFIX   0
C24   1    0.008175    0.221205    0.610637    11.00000    0.04537    0.08083 =
         0.05616    0.02910    0.00220    0.03400
PART 1
F031  3    0.864746    0.478828    0.522302    41.00000    0.07096    0.13167 =
         0.03982    0.03236    0.01438    0.01824
PART 0
F11   3    0.882598    0.764052    0.647787    11.00000    0.16375    0.09949 =
         0.12000   -0.01675    0.09088   -0.05057
F3    3   -0.117579    0.268717    0.617888    11.00000    0.11805    0.30151 =
         0.19662    0.16682    0.08865    0.16322
C50   1    0.356551    0.780657    0.853116    11.00000    0.05372    0.04501 =
         0.08066    0.00993    0.01507    0.02982
C81   1    0.944245    0.100373    0.767554    11.00000    0.04614    0.05685 =
         0.07763    0.02273    0.01532    0.03078
PART 1
F43A  3    0.988898    0.619908    0.560552    41.00000    0.23813    0.07147 =
         0.09349    0.04162    0.08302    0.00233
PART 0
C4    1    0.335532   -0.000342    0.750246    11.00000    0.05733    0.05127 =
         0.05270    0.01798    0.00940    0.01897
AFIX  23
H4A   2    0.334580    0.039568    0.784157    11.00000   -1.20000
H4B   2    0.402945    0.002521    0.750990    11.00000   -1.20000
AFIX   0
C73   1    0.343722   -0.005074    1.004039    11.00000    0.08415    0.07844 =
         0.05468    0.04063    0.03241    0.05283
PART 1
F6A   3    0.096461    0.084980    0.461600    61.00000    0.12595    0.17597 =
         0.04856   -0.01711   -0.01123    0.08383
PART 0
C36   1    0.638377    0.468921    0.494757    11.00000    0.07450    0.10467 =
         0.04481    0.04914    0.03569    0.06480
C69   1    0.414826    0.179464    1.014888    11.00000    0.07682    0.08225 =
         0.03104    0.02950    0.02946    0.05790
AFIX  43
H69   2    0.389656    0.185979    1.045900    11.00000   -1.20000
AFIX   0
C100  1    0.905914    0.521528    0.609412    11.00000    0.06009    0.06208 =
         0.03743    0.00985    0.02454    0.00196
C58   1    0.143925    0.195513    1.023870    11.00000    0.08743    0.05836 =
         0.04360    0.01472    0.03592    0.01631
C35   1    0.634888    0.575946    0.652474    11.00000    0.08654    0.05048 =
         0.05089    0.01530    0.04334    0.01455
AFIX  43
H35   2    0.635462    0.599757    0.687777    11.00000   -1.20000
AFIX   0
PART 1
F29A  3    0.257512   -0.062880    0.977239    21.00000    0.10012    0.08430 =
         0.10232    0.06940   -0.00237    0.02395
PART 0
F12   3    0.811339    0.742141    0.711636    11.00000    0.19613    0.12929 =
         0.11247   -0.05437    0.09336   -0.09013
F16   3   -0.005464    0.630450    0.882393    11.00000    0.09438    0.12815 =
         0.28668    0.05732    0.09093    0.08839
C45   1    0.130379    0.486877    0.850692    11.00000    0.04152    0.05441 =
         0.12366    0.03281    0.04411    0.02988
AFIX  43
H45   2    0.078557    0.421036    0.849560    11.00000   -1.20000
AFIX   0
C6    1    0.169554    0.060264    0.669543    11.00000    0.04604    0.05274 =
         0.05453    0.01807    0.01177    0.01979
AFIX  23
H6A   2    0.198261    0.058213    0.637839    11.00000   -1.20000
H6B   2    0.144836    0.110807    0.674260    11.00000   -1.20000
AFIX   0
C102  1    0.938969    0.529507    0.559536    11.00000    0.05396    0.06685 =
         0.04656    0.01962    0.02460    0.01209
C25   1   -0.011891    0.177253    0.558240    11.00000    0.05354    0.08045 =
         0.06075    0.02529   -0.01090    0.02824
AFIX  43
H25   2   -0.079363    0.146412    0.540033    11.00000   -1.20000
AFIX   0
PART 1
F18A  3   -0.060183    0.500496    0.806638    71.00000    0.03563    0.14074 =
         0.19633    0.07508    0.02749    0.03605
F28A  3    0.338929    0.019764    1.052889    21.00000    0.15065    0.10417 =
         0.05766    0.05214    0.06332    0.04734
PART 0
C28   1   -0.075669    0.223016    0.637140    11.00000    0.04435    0.13167 =
         0.08176    0.04427    0.01654    0.05041
C29   1    0.042986    0.133350    0.477178    11.00000    0.07060    0.08545 =
         0.05027    0.01645   -0.01029    0.01992
PART 1
F30A  3    0.396735   -0.055812    1.003349    21.00000    0.12304    0.13033 =
         0.17884    0.12602    0.09569    0.09955
PART 0
C47   1    0.181094    0.662964    0.858864    11.00000    0.06181    0.05533 =
         0.12269    0.02399    0.03932    0.04736
AFIX  43
H47   2    0.165361    0.717218    0.863682    11.00000   -1.20000
AFIX   0
PART 1
F17A  3   -0.054315    0.473748    0.875627    71.00000    0.06735    0.20585 =
         0.29250    0.16897    0.11502    0.09076
F44A  3    0.997891    0.484459    0.548414    41.00000    0.19431    0.32726 =
         0.10890    0.12801    0.09972    0.21304
PART 0
C33   1    0.714991    0.602681    0.580107    11.00000    0.10044    0.06057 =
         0.06908    0.03315    0.06059    0.03513
AFIX  43
H33   2    0.768737    0.643718    0.565456    11.00000   -1.20000
AFIX   0
C46   1    0.108325    0.567812    0.858339    11.00000    0.05193    0.06985 =
         0.15025    0.04410    0.05543    0.04551
C5    1    0.253842   -0.108884    0.738856    11.00000    0.08873    0.06055 =
         0.08732    0.04143    0.01997    0.02615
AFIX 137
H5A   2    0.252778   -0.147597    0.704640    11.00000   -1.50000
H5B   2    0.187657   -0.111187    0.740636    11.00000   -1.50000
H5C   2    0.267731   -0.138768    0.763854    11.00000   -1.50000
AFIX   0
C7    1    0.081953   -0.043088    0.664883    11.00000    0.05812    0.07404 =
         0.06150    0.01894    0.00687    0.01953
AFIX 137
H7A   2    0.024646   -0.057129    0.640035    11.00000   -1.50000
H7B   2    0.061034   -0.044326    0.698035    11.00000   -1.50000
H7C   2    0.103173   -0.095064    0.653548    11.00000   -1.50000
AFIX   0
C34   1    0.712654    0.635126    0.630036    11.00000    0.11195    0.04708 =
         0.07334    0.01357    0.05579    0.00768
PART 1
C51A  1   -0.007156    0.538456    0.853985    71.00000    0.05988    0.09821 =
         0.17235    0.06998    0.05456    0.06544
PART 0
PART 2
C96   1    0.843418    0.509603    0.700694   -51.00000    0.06937    0.05670 =
         0.03501    0.00317    0.01349   -0.00584
AFIX  43
H96   2    0.822693    0.506299    0.732598   -51.00000   -1.20000
AFIX   0
PART 0
F10   3    0.767486    0.810254    0.659828    11.00000    0.30677    0.03889 =
         0.39916    0.00007    0.14998    0.02914
PART 2
C99   1    0.955905    0.604952    0.651267   -51.00000    0.07411    0.05604 =
         0.04680    0.00950    0.01579   -0.01325
AFIX  43
H99   2    1.011458    0.665836    0.649011   -51.00000   -1.20000
AFIX   0
PART 0
C37   1    0.792504    0.740036    0.662118    11.00000    0.19629    0.07543 =
         0.13361    0.00079    0.13603   -0.01924
PART 2
C98   1    0.922468    0.597689    0.697656   -51.00000    0.08477    0.06916 =
         0.04555    0.00553    0.02137   -0.01661
PART 0
F46   3    1.056077    0.687765    0.766040    11.00000    0.19923    0.13948 =
         0.12618   -0.03529   -0.08637    0.01847
PART 2
F28   3    0.249699   -0.015966    1.018415   -21.00000    0.08603    0.10277 =
         0.12152    0.08104    0.06420    0.05491
F29   3    0.382774   -0.007844    1.042438   -21.00000    0.11107    0.14548 =
         0.09376    0.09392    0.02467    0.05962
F30   3    0.316244   -0.096966    0.970366   -21.00000    0.14949    0.05266 =
         0.09276    0.04563    0.07014    0.03772
F39   3    0.234301   -0.137776    0.523883   -31.00000    0.06260    0.07961 =
         0.12451    0.03592   -0.00093    0.03551
F37   3    0.247119   -0.193382    0.577639   -31.00000    0.05729    0.11702 =
         0.06217    0.03559    0.02986    0.02469
F38   3    0.252755   -0.266887    0.507796   -31.00000    0.03587    0.05748 =
         0.10455   -0.03761   -0.01623    0.01217
F45A  3    0.882127    0.552591    0.530169   -41.00000    0.10260    0.27086 =
         0.06650    0.09849    0.05567    0.11022
F43   3    0.933194    0.447091    0.533363   -41.00000    0.23707    0.05825 =
         0.09940    0.03573    0.13362    0.04216
F44   3    1.027940    0.599074    0.562339   -41.00000    0.04041    0.11335 =
         0.04823    0.02198    0.02384   -0.00646
PART 0
PART 1
C96A  1    0.880318    0.464210    0.703157    51.00000    0.06937    0.05670 =
         0.03501    0.00317    0.01349   -0.00584
AFIX  43
H96A  2    0.870855    0.433941    0.729991    51.00000   -1.20000
AFIX   0
C97A  1    0.976217    0.548290    0.703435    51.00000    0.08477    0.06916 =
         0.04555    0.00553    0.02137   -0.01661
C98A  1    0.991561    0.561690    0.653209    51.00000    0.07411    0.05604 =
         0.04680    0.00950    0.01579   -0.01325
AFIX  43
H98A  2    1.059366    0.597758    0.647902    51.00000   -1.20000
AFIX   0
PART 0
PART 2
F48   3    1.005769    0.776744    0.735562   -51.00000    0.14494    0.06772 =
         0.07164    0.00136    0.00954   -0.03534
F47   3    0.919947    0.682457    0.780988   -51.00000    0.22484    0.10022 =
         0.05522   -0.01630    0.05001   -0.05822
C103  1    0.975512    0.687136    0.744279   -51.00000    0.13624    0.08478 =
         0.04577    0.00848    0.01416   -0.03204
PART 0
PART 1
C1A   1    1.061440    0.602928    0.749845    51.00000    0.13624    0.08478 =
         0.04577    0.00848    0.01416   -0.03204
F47A  3    1.058951    0.578769    0.793279    51.00000    0.22484    0.10022 =
         0.05522   -0.01630    0.05001   -0.05822
F48A  3    1.157582    0.652311    0.745290    51.00000    0.14494    0.06772 =
         0.07164    0.00136    0.00954   -0.03534
PART 0
PART 2
F4    3    0.003352    0.182729    0.451667   -61.00000    0.16488    0.18544 =
         0.08119    0.02922   -0.04118    0.10844
F5    3    0.017340    0.052607    0.459483   -61.00000    0.21056    0.07537 =
         0.07129    0.02342    0.01873    0.02477
F6    3    0.133294    0.164622    0.454311   -61.00000    0.10173    0.11079 =
         0.03302    0.01528   -0.00544    0.04166
C51   1    0.012966    0.553341    0.882590   -71.00000    0.06189    0.08575 =
         0.20918    0.05691    0.08291    0.04540
F17   3   -0.003158    0.522043    0.922546   -71.00000    0.09278    0.18473 =
         0.24387    0.11565    0.12797    0.09476
F18   3   -0.060253    0.486121    0.841247   -71.00000    0.04490    0.09458 =
         0.24616    0.05926    0.06689    0.02805
HKLF 4


REM  GB_RJ_RN_20180329_0m_a.res in P-1
REM R1 =  0.0882 for   12413 Fo > 4sig(Fo)  and  0.1247 for all   18596 data
REM   1530 parameters refined using    347 restraints

END

WGHT      0.1288     10.9280

REM Highest difference peak  1.052,  deepest hole -0.764,  1-sigma level  0.076
Q1    1   1.0027  0.6272  0.7918  11.00000  0.05    1.05
Q2    1   0.4570  0.4050  0.9925  11.00000  0.05    0.89
Q3    1   1.1191  0.6725  0.7490  11.00000  0.05    0.83
Q4    1   0.0471 -0.1296  0.8089  11.00000  0.05    0.70
Q5    1   0.0193 -0.1508  0.8697  11.00000  0.05    0.68
Q6    1   0.0037  0.1311  1.0007  11.00000  0.05    0.61
Q7    1   0.8481  0.8052  0.6901  11.00000  0.05    0.57
Q8    1   0.1268  0.1062  1.0305  11.00000  0.05    0.56
Q9    1   0.4384  0.7750  0.8515  11.00000  0.05    0.54
Q10   1   0.8639  0.6990  0.7019  11.00000  0.05    0.51
Q11   1   0.9266  0.7200  0.6734  11.00000  0.05    0.51
Q12   1   0.3678  0.8216  0.9194  11.00000  0.05    0.48
Q13   1   0.0830  0.2066  1.0183  11.00000  0.05    0.48
Q14   1   0.5820 -0.2491  0.8072  11.00000  0.05    0.47
Q15   1   0.7239 -0.0697  0.5305  11.00000  0.05    0.42
Q16   1   0.2620 -0.0547  0.6694  11.00000  0.05    0.42
Q17   1   0.1626 -0.0983  0.8990  11.00000  0.05    0.41
Q18   1   0.7019 -0.2591  0.7913  11.00000  0.05    0.40
Q19   1   0.1430  0.1756  1.0491  11.00000  0.05    0.40
Q20   1   0.3510  0.3068  1.0408  11.00000  0.05    0.39
;
_shelx_res_checksum                40879
_shelx_hkl_file
;
  -1   0   0  211.08    5.50
  -1   0   0  244.08    5.50
  -1   0   0  239.08    5.50
   1   0   0  237.98    5.50
   1   0   0  232.68    5.50
   1   0   0  235.78    5.50
  -2   0   0  306.67    7.10
  -2   0   0  318.17    7.30
  -2   0   0  295.27    7.30
  -2   0   0  310.67    7.30
  -2   0   0  306.07    7.30
  -2   0   0  302.87    7.40
  -2   0   0  312.37    7.40
   2   0   0  302.07    7.10
   2   0   0  304.57    7.40
   2   0   0  309.77    7.30
   2   0   0  311.47    7.30
   2   0   0  291.37    7.30
   2   0   0  308.77    7.30
  -3   0   0  445.26   10.80
  -3   0   0  430.06   10.90
  -3   0   0  464.75   10.90
  -3   0   0  449.46   10.40
  -3   0   0  477.85   10.90
  -3   0   0  453.95   10.80
  -3   0   0  455.25   11.00
   3   0   0  453.35   10.80
   3   0   0  455.35   10.80
   3   0   0  451.95   10.80
   3   0   0  438.46   10.50
   3   0   0  439.86   10.70
   3   0   0  445.06   11.00
  -4   0   0    2.30    0.40
  -4   0   0    2.70    0.80
  -4   0   0    1.30    0.80
  -4   0   0    1.80    0.90
  -4   0   0    1.90    0.70
  -4   0   0    2.30    0.70
   4   0   0    2.20    0.70
   4   0   0    3.00    0.80
   4   0   0    1.40    0.80
   4   0   0    2.40    0.50
   4   0   0    1.60    1.10
  -5   0   0  196.68    5.50
  -5   0   0  193.98    4.80
  -5   0   0  199.68    5.50
  -5   0   0  206.08    5.50
  -5   0   0  197.58    5.70
  -5   0   0  200.68    5.50
   5   0   0  201.08    5.00
   5   0   0  203.78    5.60
   5   0   0  195.18    5.80
  -6   0   0    0.40    1.00
  -6   0   0   -0.10    1.10
  -6   0   0    0.90    1.00
  -6   0   0    0.60    1.00
  -6   0   0   -0.30    1.40
   6   0   0    0.20    0.60
   6   0   0    0.10    1.00
   6   0   0   -0.10    1.20
  -7   0   0   52.49    3.00
  -7   0   0   56.59    2.70
  -7   0   0   54.29    2.70
  -7   0   0   51.39    2.60
  -7   0   0   55.69    2.70
   7   0   0   53.09    1.90
   7   0   0   51.39    3.00
   7   0   0   55.19    2.60
  -8   0   0   51.49    2.70
  -8   0   0   49.40    2.80
  -8   0   0   51.29    2.80
  -8   0   0   46.90    2.80
  -8   0   0   47.30    2.90
   8   0   0   47.70    2.80
   8   0   0   49.99    1.90
   8   0   0   49.40    3.10
  -9   0   0   15.90    2.00
  -9   0   0   17.30    2.40
  -9   0   0   16.40    2.20
  -9   0   0   16.70    2.20
  -9   0   0   14.00    2.60
   9   0   0   14.50    1.20
   9   0   0   14.80    2.20
   9   0   0   15.80    2.40
 -10   0   0   35.90    2.90
 -10   0   0   38.10    3.10
 -10   0   0   37.90    3.10
 -10   0   0   35.80    3.40
  10   0   0   39.00    3.40
 -11   0   0    4.90    2.50
 -11   0   0    1.30    1.80
 -11   0   0    4.50    2.30
 -11   0   0    5.70    2.00
  11   0   0    1.80    2.40
 -12   0   0    8.90    2.20
 -12   0   0   15.10    2.90
 -12   0   0   10.30    3.40
 -12   0   0   10.60    2.50
  12   0   0    7.50    3.10
 -13   0   0   10.60    2.90
 -13   0   0   14.80    3.20
 -13   0   0   18.80    3.90
 -13   0   0   13.00    2.70
  13   0   0   18.30    3.90
 -14   0   0    5.80    2.60
 -14   0   0    3.60    2.70
 -14   0   0    3.20    2.90
 -14   0   0   12.80    3.80
  14   0   0    0.40    3.10
 -15   0   0    4.20    3.90
 -15   0   0    6.20    2.90
 -15   0   0   -1.60    2.70
 -15   0   0    1.00    2.50
  15   0   0    1.50    3.20
  15  -1   0    5.40    3.80
 -15   1   0   -3.80    2.60
 -15   1   0    0.30    2.60
 -15   1   0    2.80    3.30
 -15   1   0    0.00    2.40
  14  -1   0    5.80    3.20
 -14   1   0   -3.20    1.70
 -14   1   0    5.20    2.50
 -14   1   0   -5.00    2.10
 -14   1   0    5.80    3.60
  13  -1   0    6.40    2.90
 -13   1   0    4.90    2.20
 -13   1   0    3.90    2.70
 -13   1   0    4.30    2.30
 -13   1   0    4.80    3.40
  12  -1   0   28.00    3.80
 -12   1   0   42.40    3.60
 -12   1   0   30.90    3.50
 -12   1   0   34.50    2.90
 -12   1   0   34.80    4.10
  11  -1   0    4.70    2.70
 -11   1   0    4.60    1.90
 -11   1   0    8.10    1.90
 -11   1   0    6.30    2.80
 -11   1   0    3.00    2.00
  10  -1   0    9.90    2.30
 -10   1   0   13.70    2.00
 -10   1   0   13.20    1.90
 -10   1   0   13.70    2.70
 -10   1   0   10.00    1.90
   9  -1   0   45.40    2.80
   9  -1   0   49.00    3.30
  -9   1   0   52.79    3.50
  -9   1   0   46.80    2.70
  -9   1   0   56.09    2.90
  -9   1   0   55.59    3.00
  -9   1   0   47.80    2.60
   8  -1   0    1.60    1.40
   8  -1   0    2.00    0.50
   8  -1   0    2.40    1.70
  -8   1   0    3.60    1.80
  -8   1   0    0.90    1.00
  -8   1   0    1.50    1.10
  -8   1   0    4.40    1.30
  -8   1   0    1.00    1.20
   7  -1   0    4.60    0.70
   7  -1   0    2.30    1.40
  -7   1   0    4.10    1.20
  -7   1   0    4.60    1.20
  -7   1   0    5.00    1.60
  -7   1   0    3.60    1.10
  -7   1   0    5.80    1.10
   6  -1   0    3.20    1.30
   6  -1   0    3.00    0.50
  -6   1   0    4.00    0.50
  -6   1   0    2.00    1.40
  -6   1   0    5.10    1.10
  -6   1   0    4.30    1.00
  -6   1   0    2.50    1.00
  -6   1   0    6.10    1.20
   5  -1   0   90.79    3.40
   5  -1   0   96.99    2.50
  -5   1   0  100.39    2.40
  -5   1   0  104.99    3.10
  -5   1   0   96.19    3.00
  -5   1   0   99.09    3.10
  -5   1   0   92.69    3.40
  -5   1   0   99.99    3.10
   4  -1   0  713.23   16.50
   4  -1   0  702.73   16.10
   4  -1   0  697.43   16.90
   4  -1   0  706.53   16.60
  -4   1   0  733.13   16.60
  -4   1   0  718.23   16.60
  -4   1   0  695.03   16.90
  -4   1   0  682.63   16.60
  -4   1   0  701.43   17.00
  -4   1   0  692.63   16.60
   3  -1   0  231.58    5.70
   3  -1   0  235.08    6.00
   3  -1   0  235.68    6.00
   3  -1   0  225.48    5.70
   3  -1   0  237.28    5.60
   3  -1   0  196.88    5.60
  -3   1   0  241.78    5.70
  -3   1   0  219.28    5.90
  -3   1   0  230.28    5.70
  -3   1   0  245.68    5.70
  -3   1   0  231.38    5.70
  -3   1   0  226.78    5.90
   2  -1   0    0.70    0.50
   2  -1   0    0.70    0.40
   2  -1   0    0.10    0.30
   2  -1   0    0.70    0.30
   2  -1   0    0.30    0.30
  -2   1   0    0.40    0.30
  -2   1   0    0.90    0.50
  -2   1   0    0.60    0.50
  -2   1   0    0.40    0.30
  -2   1   0    0.10    0.30
  -2   1   0    0.40    0.30
   1  -1   0   67.49    1.90
   1  -1   0   67.89    1.80
   1  -1   0   67.29    1.70
   1  -1   0   67.49    1.60
  -1   1   0   60.69    1.80
  -1   1   0   68.79    1.60
  -1   1   0   70.89    1.70
   0  -1   0   79.39    2.10
   0  -1   0   80.29    2.10
   0   1   0   78.29    2.00
   0   1   0   80.09    2.10
   0   1   0   81.29    2.00
   0   1   0   79.29    2.00
  -1  -1   0  334.07    8.00
  -1  -1   0  327.97    7.70
  -1  -1   0  336.07    7.80
  -1  -1   0  311.07    7.70
  -1  -1   0  336.07    7.90
  -1  -1   0  329.17    7.80
   1   1   0  328.47    7.90
   1   1   0  336.57    7.80
   1   1   0  342.27    7.90
   1   1   0  327.57    7.70
   1   1   0  332.97    7.90
   1   1   0  330.47    7.90
  -2  -1   0   14.60    0.90
  -2  -1   0   13.40    0.80
  -2  -1   0   12.10    1.00
  -2  -1   0   12.20    1.10
  -2  -1   0   12.60    1.10
  -2  -1   0   14.40    1.10
   2   1   0   12.40    1.10
   2   1   0   13.70    1.00
   2   1   0   12.60    1.20
   2   1   0   13.00    0.90
   2   1   0   12.90    1.10
   2   1   0   11.90    0.90
  -3  -1   0  171.88    4.90
  -3  -1   0  190.88    4.60
  -3  -1   0  192.18    4.90
  -3  -1   0  188.48    5.10
  -3  -1   0  187.98    4.80
  -3  -1   0  170.58    4.90
   3   1   0  195.98    5.10
   3   1   0  181.18    4.70
   3   1   0  179.68    4.90
   3   1   0  185.58    4.60
   3   1   0  178.68    5.00
   3   1   0  164.08    4.80
  -4  -1   0   72.39    2.50
  -4  -1   0   77.99    2.60
  -4  -1   0   74.19    2.70
  -4  -1   0   76.39    2.20
  -4  -1   0   73.79    2.70
   4   1   0   73.99    2.90
   4   1   0   71.99    2.30
   4   1   0   71.99    2.60
  -5  -1   0  815.72   19.10
  -5  -1   0  802.22   19.00
  -5  -1   0  827.52   18.50
  -5  -1   0  796.12   19.20
  -5  -1   0  765.92   19.20
  -5  -1   0  787.32   19.10
   5   1   0  797.02   19.20
   5   1   0  776.02   18.60
   5   1   0  788.82   19.40
  -6  -1   0   93.89    3.60
  -6  -1   0   92.49    3.40
  -6  -1   0   85.49    3.40
  -6  -1   0   86.29    3.30
  -6  -1   0   84.39    3.30
   6   1   0   88.79    2.80
   6   1   0  100.29    3.90
   6   1   0   86.59    3.40
  -7  -1   0   12.80    1.80
  -7  -1   0   10.50    1.70
  -7  -1   0   13.00    2.00
  -7  -1   0   12.20    1.70
  -7  -1   0   11.70    1.70
   7   1   0    9.20    1.20
   7   1   0   12.00    1.70
   7   1   0   10.00    1.80
  -8  -1   0   -0.80    1.20
  -8  -1   0    1.60    1.20
  -8  -1   0    0.80    1.20
  -8  -1   0   -0.50    1.60
  -8  -1   0    2.30    1.40
   8   1   0    1.10    1.60
   8   1   0    2.60    1.40
  -9  -1   0    3.50    1.50
  -9  -1   0    1.50    1.50
  -9  -1   0    3.80    1.80
  -9  -1   0    1.70    1.90
   9   1   0    0.10    1.80
   9   1   0    1.80    1.50
 -10  -1   0    4.40    2.50
 -10  -1   0    3.40    1.70
 -10  -1   0    0.80    1.70
 -10  -1   0    2.90    1.80
  10   1   0    1.40    2.20
 -11  -1   0    1.40    2.20
 -11  -1   0    7.80    2.30
 -11  -1   0    7.30    2.80
 -11  -1   0    5.40    1.90
  11   1   0    4.00    2.90
 -12  -1   0    3.10    2.20
 -12  -1   0    5.50    3.00
 -12  -1   0    5.50    2.40
 -12  -1   0    5.40    2.10
  12   1   0    5.20    2.80
 -13  -1   0    3.00    2.70
 -13  -1   0    8.30    2.70
 -13  -1   0   10.80    3.60
 -13  -1   0    7.00    2.40
  13   1   0    9.00    3.30
 -14  -1   0    6.50    3.50
 -14  -1   0    4.50    2.70
 -14  -1   0   -0.70    2.60
 -14  -1   0   -2.60    2.50
  14   1   0   -0.70    3.40
 -16   2   0    4.50    3.30
 -16   2   0   -0.40    2.00
 -16   2   0   13.40    4.50
 -16   2   0   -6.50    2.50
 -15   2   0    2.60    2.30
 -15   2   0   -2.90    2.50
 -15   2   0    5.20    4.00
 -15   2   0   -1.10    2.40
  14  -2   0    3.30    3.20
 -14   2   0   -0.80    2.30
 -14   2   0   -0.70    2.00
 -14   2   0    8.10    3.70
 -14   2   0    3.30    2.50
  13  -2   0    3.00    2.80
 -13   2   0    5.20    2.30
 -13   2   0    7.30    3.50
 -13   2   0    3.00    2.00
 -13   2   0   -2.50    2.10
  12  -2   0   16.00    3.40
 -12   2   0    9.70    2.50
 -12   2   0   16.30    2.80
 -12   2   0   12.00    2.10
 -12   2   0   21.60    3.80
  11  -2   0    6.30    2.60
 -11   2   0    3.90    1.60
 -11   2   0    1.80    1.90
 -11   2   0    7.20    2.50
 -11   2   0    5.60    1.90
  10  -2   0    6.80    2.10
 -10   2   0    5.50    1.80
 -10   2   0   10.80    2.70
 -10   2   0    7.60    1.60
 -10   2   0   10.90    1.90
 -10   2   0    7.80    1.50
   9  -2   0    4.30    1.50
   9  -2   0    5.70    2.00
  -9   2   0    5.40    1.30
  -9   2   0    4.70    1.30
  -9   2   0    5.90    1.60
  -9   2   0    4.30    1.40
  -9   2   0    6.10    2.00
   8  -2   0   50.09    2.60
   8  -2   0   49.90    3.10
  -8   2   0   48.80    2.50
  -8   2   0   49.30    2.40
  -8   2   0   49.50    2.70
  -8   2   0   49.40    2.50
  -8   2   0   54.79    3.30
   7  -2   0  100.89    3.60
   7  -2   0   96.19    4.10
  -7   2   0  100.79    3.50
  -7   2   0   99.49    3.60
  -7   2   0   99.79    3.40
  -7   2   0   94.69    4.00
  -7   2   0   99.69    3.40
   6  -2   0    0.40    0.80
   6  -2   0    2.30    1.40
  -6   2   0    1.10    0.90
  -6   2   0    1.90    0.90
  -6   2   0    0.70    0.80
  -6   2   0    1.70    1.40
  -6   2   0    1.90    0.80
   5  -2   0  855.81   19.80
   5  -2   0  861.01   19.90
  -5   2   0  804.82   20.20
  -5   2   0  821.82   19.80
  -5   2   0  838.92   19.70
  -5   2   0  836.02   19.80
  -5   2   0  857.71   19.70
   4  -2   0  385.26    9.10
   4  -2   0  374.66    9.00
   4  -2   0  378.16    9.10
   4  -2   0  376.96    9.20
   4  -2   0  369.56    9.40
  -4   2   0  370.86    8.70
  -4   2   0  384.16    9.50
  -4   2   0  375.36    9.10
  -4   2   0  371.66    9.10
  -4   2   0  372.26    9.00
  -4   2   0  370.06    9.10
  -4   2   0  374.26    9.60
   3  -2   0   34.10    1.50
   3  -2   0   33.30    1.30
   3  -2   0   30.50    1.30
   3  -2   0   31.90    1.30
   3  -2   0   33.50    1.60
  -3   2   0   32.20    1.40
  -3   2   0   33.50    1.40
  -3   2   0   32.50    1.20
  -3   2   0   36.70    1.40
  -3   2   0   28.60    1.80
   2  -2   0   88.99    2.50
   2  -2   0   95.79    2.40
   2  -2   0   88.39    2.60
   2  -2   0   90.39    2.50
  -2   2   0   96.59    2.30
  -2   2   0   89.99    2.50
  -2   2   0   91.49    2.80
  -2   2   0   91.69    2.50
   1  -2   0   75.69    2.30
   1  -2   0   81.59    2.30
   1  -2   0   79.59    2.10
   1  -2   0   76.99    2.40
   1  -2   0   77.99    2.10
  -1   2   0   82.29    2.10
  -1   2   0   78.89    1.90
  -1   2   0   77.69    2.30
  -1   2   0   80.59    2.20
  -1   2   0   81.89    2.10
  -1   2   0   76.29    2.40
  -1   2   0   78.39    2.20
   0  -2   0  108.29    3.00
   0  -2   0  107.79    2.60
   0  -2   0  105.89    3.10
   0  -2   0  107.79    2.90
   0  -2   0  106.99    2.90
   0  -2   0  107.19    3.00
   0  -2   0  116.49    2.80
   0   2   0  104.19    3.00
   0   2   0  112.09    2.90
   0   2   0  109.69    2.90
   0   2   0  107.79    2.90
   0   2   0  106.69    3.10
   0   2   0  111.59    2.60
   0   2   0  108.09    3.00
  -1  -2   0   -0.20    0.80
  -1  -2   0    0.50    0.80
  -1  -2   0    1.30    0.90
  -1  -2   0    0.20    0.50
  -1  -2   0    0.60    0.60
  -1  -2   0    1.00    0.60
  -1  -2   0    0.90    0.70
   1   2   0    0.40    0.90
   1   2   0    0.00    0.70
   1   2   0    0.70    0.50
   1   2   0    0.20    0.50
   1   2   0    0.70    0.60
   1   2   0    0.50    0.70
  -2  -2   0  206.78    5.00
  -2  -2   0  198.28    5.30
  -2  -2   0  201.48    5.40
  -2  -2   0  199.88    5.20
  -2  -2   0  192.08    5.40
  -2  -2   0  205.08    5.00
   2   2   0  198.88    5.10
   2   2   0  196.68    5.20
   2   2   0  191.28    5.30
   2   2   0  199.28    5.00
   2   2   0  195.88    5.20
   2   2   0  180.88    5.30
  -3  -2   0  393.16   10.30
  -3  -2   0  421.36   10.50
  -3  -2   0  421.26   10.10
  -3  -2   0  427.26   10.30
  -3  -2   0  400.96   10.00
   3   2   0  424.06   10.40
   3   2   0  419.66   10.60
   3   2   0  422.06   10.40
   3   2   0  422.36   10.10
  -4  -2   0   27.00    1.80
  -4  -2   0   23.90    1.30
  -4  -2   0   23.50    1.50
  -4  -2   0   22.90    1.60
  -4  -2   0   26.40    1.70
   4   2   0   24.30    1.40
   4   2   0   27.60    1.70
   4   2   0   24.90    2.00
  -5  -2   0    1.30    1.10
  -5  -2   0    1.00    1.10
  -5  -2   0    1.70    1.00
  -5  -2   0    2.30    1.20
   5   2   0    2.20    1.30
   5   2   0    0.90    1.10
  -6  -2   0    0.70    1.10
  -6  -2   0    0.30    1.10
  -6  -2   0    0.40    1.10
  -6  -2   0    0.70    1.10
  -6  -2   0   -0.60    1.30
   6   2   0    1.70    1.50
   6   2   0   -2.00    0.90
  -7  -2   0    5.90    1.50
  -7  -2   0    8.70    1.70
  -7  -2   0    7.80    1.60
  -7  -2   0    5.30    1.40
  -7  -2   0    6.30    1.80
   7   2   0    6.60    1.50
   7   2   0    6.00    2.00
  -8  -2   0   32.40    2.50
  -8  -2   0   26.00    2.50
  -8  -2   0   31.20    2.70
  -8  -2   0   25.60    2.30
  -8  -2   0   26.20    2.50
   8   2   0   31.90    3.20
   8   2   0   24.80    2.60
  -9  -2   0   -1.70    1.60
  -9  -2   0    0.80    1.60
  -9  -2   0    1.90    1.80
  -9  -2   0    2.20    2.00
   9   2   0    0.80    2.00
   9   2   0   -1.80    2.30
 -10  -2   0    5.00    2.20
 -10  -2   0    8.00    2.60
 -10  -2   0    4.50    1.90
 -10  -2   0    7.30    2.30
  10   2   0    3.40    2.60
 -11  -2   0    3.20    2.40
 -11  -2   0    1.50    2.60
 -11  -2   0    3.20    2.10
 -11  -2   0    1.60    2.10
  11   2   0    5.50    3.00
 -12  -2   0   30.90    3.40
 -12  -2   0   32.10    3.80
 -12  -2   0   34.00    4.10
 -12  -2   0   26.30    3.90
  12   2   0   22.50    4.00
 -13  -2   0   13.90    3.40
 -13  -2   0    9.30    2.70
 -13  -2   0   15.10    3.80
 -13  -2   0    3.80    2.60
  13   2   0   12.80    3.90
 -14  -2   0   -5.10    2.80
 -14  -2   0    1.70    2.50
 -14  -2   0    6.60    3.60
 -14  -2   0    3.80    3.10
  14   2   0    2.20    3.70
 -16   3   0   -0.30    2.50
 -16   3   0   10.40    4.30
 -16   3   0    2.20    2.20
 -16   3   0   -3.10    2.50
 -15   3   0    0.40    2.60
 -15   3   0    2.80    2.70
 -15   3   0    8.50    4.10
 -15   3   0    3.00    2.10
 -14   3   0   62.89    3.90
 -14   3   0   69.49    5.70
 -14   3   0   59.79    4.60
 -14   3   0   62.29    4.40
 -13   3   0    1.40    1.70
 -13   3   0    1.10    2.20
 -13   3   0    3.70    2.20
 -13   3   0    1.20    2.70
 -12   3   0   23.80    2.60
 -12   3   0   24.30    4.00
 -12   3   0   15.90    2.60
 -12   3   0   17.50    2.70
 -11   3   0   18.60    2.90
 -11   3   0   18.40    2.30
 -11   3   0   18.60    2.10
 -11   3   0   16.80    2.50
  10  -3   0   89.49    3.90
 -10   3   0   88.39    4.50
 -10   3   0   98.39    4.10
 -10   3   0   92.69    3.70
 -10   3   0   98.89    3.70
 -10   3   0   95.79    4.00
   9  -3   0    0.20    1.10
  -9   3   0   -0.10    1.20
  -9   3   0    0.10    1.00
  -9   3   0   -0.20    1.10
  -9   3   0   -0.40    1.70
  -9   3   0   -1.00    1.20
   8  -3   0   45.60    2.50
  -8   3   0   44.60    3.10
  -8   3   0   44.00    2.10
  -8   3   0   43.80    2.30
  -8   3   0   46.30    2.50
  -8   3   0   42.30    2.20
   7  -3   0    7.00    1.20
  -7   3   0    8.60    1.20
  -7   3   0   10.60    1.30
  -7   3   0    4.80    1.70
  -7   3   0    9.90    1.40
  -7   3   0   10.80    1.60
   6  -3   0   14.00    1.30
   6  -3   0   14.10    1.40
  -6   3   0   17.00    1.20
  -6   3   0   14.70    1.30
  -6   3   0   13.70    1.30
  -6   3   0   13.00    0.70
  -6   3   0   12.80    1.70
  -6   3   0   14.90    1.50
   5  -3   0  376.06    9.20
   5  -3   0  379.16    9.40
  -5   3   0  366.46    9.90
  -5   3   0  374.46    9.20
  -5   3   0  376.66    9.40
  -5   3   0  387.56    9.10
  -5   3   0  369.96    9.20
   4  -3   0  196.18    5.10
   4  -3   0  197.98    5.80
   4  -3   0  185.48    4.90
   4  -3   0  192.88    4.90
  -4   3   0  192.28    5.10
  -4   3   0  190.98    4.90
  -4   3   0  188.58    5.60
  -4   3   0  192.88    4.80
  -4   3   0  191.88    5.00
   3  -3   0  178.08    4.60
   3  -3   0  184.08    4.50
   3  -3   0  179.18    5.00
   3  -3   0  176.68    4.70
  -3   3   0  181.78    4.80
  -3   3   0  182.58    4.70
  -3   3   0  184.18    4.50
  -3   3   0  181.48    4.50
  -3   3   0  175.28    4.40
  -3   3   0  172.18    5.20
   2  -3   0 2611.24   59.89
   2  -3   0 2552.74   61.89
   2  -3   0 2667.13   59.89
   2  -3   0 2405.96   59.69
   2  -3   0 2699.33   59.59
  -2   3   0 2671.43   60.89
  -2   3   0 2543.75   59.99
  -2   3   0 2511.75   60.19
  -2   3   0 2621.34   61.29
  -2   3   0 2626.94   59.49
  -2   3   0 2550.54   60.79
  -2   3   0 2579.14   60.19
   1  -3   0 1563.54   38.80
   1  -3   0 1792.22   39.70
   1  -3   0 1705.13   38.80
   1  -3   0 1635.44   38.60
   1  -3   0 1738.13   39.00
  -1   3   0 1644.04   38.70
  -1   3   0 1646.84   38.80
  -1   3   0 1652.33   38.60
  -1   3   0 1693.13   39.50
  -1   3   0 1603.14   39.00
  -1   3   0 1703.03   38.30
  -1   3   0 1746.03   39.30
   0  -3   0 2809.82   64.89
   0  -3   0 2655.53   66.09
   0  -3   0 2684.93   64.69
   0  -3   0 2560.24   66.09
   0  -3   0 3095.89   66.19
   0  -3   0 2675.13   65.19
   0  -3   0 3140.39   65.59
   0   3   0 2929.11   64.99
   0   3   0 2649.03   64.69
   0   3   0 3157.08   66.09
   0   3   0 2646.14   65.09
   0   3   0 2810.22   66.39
   0   3   0 2877.51   66.39
  -1  -3   0  231.28    6.20
  -1  -3   0  243.98    6.40
  -1  -3   0  240.78    5.90
  -1  -3   0  238.18    6.10
  -1  -3   0  246.38    6.20
  -1  -3   0  241.48    6.50
  -1  -3   0  245.08    6.60
   1   3   0  245.58    6.60
   1   3   0  244.48    5.90
   1   3   0  237.68    6.20
   1   3   0  251.77    6.20
   1   3   0  241.38    6.40
   1   3   0  249.68    6.40
  -2  -3   0   24.70    1.50
  -2  -3   0   22.70    1.20
  -2  -3   0   26.90    1.70
  -2  -3   0   22.90    1.30
  -2  -3   0   23.60    1.50
   2   3   0   23.90    1.60
   2   3   0   23.50    1.10
   2   3   0   24.00    1.60
   2   3   0   23.00    1.70
  -3  -3   0  244.38    6.00
  -3  -3   0  235.78    6.70
  -3  -3   0  226.08    6.10
  -3  -3   0  221.08    6.30
  -3  -3   0  234.98    6.30
   3   3   0  243.98    6.60
   3   3   0  230.08    6.40
   3   3   0  225.38    6.60
  -4  -3   0  448.36   11.20
  -4  -3   0  445.96   11.40
  -4  -3   0  446.16   11.80
  -4  -3   0  446.26   11.50
   4   3   0  459.45   11.80
   4   3   0  461.15   11.60
  -5  -3   0  155.18    4.70
  -5  -3   0  158.48    5.40
  -5  -3   0  155.58    4.90
  -5  -3   0  153.88    5.00
   5   3   0  153.38    5.10
   5   3   0  157.58    5.30
  -6  -3   0  139.99    4.90
  -6  -3   0  138.29    4.50
  -6  -3   0  135.19    4.60
  -6  -3   0  136.19    4.70
   6   3   0  137.39    5.10
   6   3   0  146.59    4.90
  -7  -3   0   20.80    2.00
  -7  -3   0   22.60    2.40
  -7  -3   0   23.40    2.40
  -7  -3   0   17.10    2.10
   7   3   0   23.50    3.00
   7   3   0   18.80    2.40
  -8  -3   0   47.70    3.30
  -8  -3   0   50.39    3.10
  -8  -3   0   48.10    3.10
  -8  -3   0   45.70    3.20
   8   3   0   49.50    3.50
   8   3   0   40.20    3.00
  -9  -3   0   41.30    3.30
  -9  -3   0   48.90    3.30
  -9  -3   0   48.00    3.10
  -9  -3   0   49.90    3.50
   9   3   0   41.90    3.70
 -10  -3   0   26.60    3.30
 -10  -3   0   22.90    3.20
 -10  -3   0   32.10    3.20
 -10  -3   0   27.60    3.40
  10   3   0   30.40    4.10
 -11  -3   0    1.00    2.60
 -11  -3   0    3.30    2.60
 -11  -3   0   -3.20    2.10
 -11  -3   0    0.80    2.20
  11   3   0    4.20    2.80
 -12  -3   0   -2.10    2.60
 -12  -3   0    3.80    3.10
 -12  -3   0    3.50    2.50
 -12  -3   0    3.50    2.50
  12   3   0    1.60    3.30
 -13  -3   0   12.80    3.20
 -13  -3   0    6.80    3.10
 -13  -3   0   17.10    3.20
 -13  -3   0   17.70    5.50
  13   3   0   15.90    4.00
 -16   4   0   16.90    3.50
 -16   4   0   14.60    3.00
 -16   4   0   12.00    3.30
 -16   4   0   28.40    5.20
 -15   4   0   -1.00    1.90
 -15   4   0    6.50    4.00
 -15   4   0   -1.80    2.30
 -15   4   0    1.80    2.70
 -14   4   0   28.90    4.20
 -14   4   0   22.70    3.10
 -14   4   0   18.10    2.50
 -14   4   0   19.60    3.20
 -13   4   0    1.10    2.00
 -13   4   0    2.40    1.70
 -13   4   0    3.30    2.10
 -13   4   0    6.60    3.50
 -12   4   0   23.40    2.40
 -12   4   0   26.70    4.00
 -12   4   0   26.80    3.10
 -12   4   0   23.70    3.00
 -11   4   0    5.20    1.30
 -11   4   0    6.90    1.80
 -11   4   0    5.20    1.90
 -11   4   0    4.00    1.40
 -11   4   0    6.20    2.80
  10  -4   0    3.30    1.40
 -10   4   0    1.90    1.20
 -10   4   0    3.60    1.50
 -10   4   0    4.80    1.20
 -10   4   0    4.50    2.50
 -10   4   0    5.60    1.50
   9  -4   0   29.30    2.30
  -9   4   0   29.80    2.00
  -9   4   0   30.50    2.10
  -9   4   0   30.00    3.00
  -9   4   0   30.40    2.40
  -9   4   0   29.90    1.90
   8  -4   0   53.49    2.60
  -8   4   0   50.39    2.30
  -8   4   0   52.99    2.60
  -8   4   0   54.29    2.20
  -8   4   0   50.69    3.40
  -8   4   0   51.29    2.50
   7  -4   0  202.78    5.70
   7  -4   0  209.18    5.90
  -7   4   0  206.88    5.60
  -7   4   0  203.48    5.60
  -7   4   0  197.48    5.00
  -7   4   0  204.48    4.90
  -7   4   0  192.68    6.50
  -7   4   0  198.38    5.90
  -7   4   0  200.28    5.40
   6  -4   0  373.96    9.40
   6  -4   0  400.76    9.70
  -6   4   0  379.86    9.40
  -6   4   0  384.66    8.90
  -6   4   0  378.06    9.20
  -6   4   0  374.86    9.40
  -6   4   0  372.16    9.70
  -6   4   0  364.66   10.20
   5  -4   0   12.70    1.30
  -5   4   0   11.80    1.00
  -5   4   0   12.70    1.10
  -5   4   0   14.50    0.90
  -5   4   0   13.10    1.40
  -5   4   0   12.20    1.20
  -5   4   0   10.90    1.60
   4  -4   0  605.34   14.70
   4  -4   0  620.44   14.50
  -4   4   0  623.64   14.50
  -4   4   0  615.64   14.80
  -4   4   0  623.54   14.80
  -4   4   0  628.04   14.50
  -4   4   0  633.84   14.50
  -4   4   0  593.04   15.30
   3  -4   0   82.19    2.90
   3  -4   0   83.49    2.60
   3  -4   0   85.79    2.30
  -3   4   0   80.99    2.50
  -3   4   0   83.49    2.80
  -3   4   0   83.69    2.20
  -3   4   0   84.69    3.20
  -3   4   0   80.29    2.80
   2  -4   0  800.72   19.50
   2  -4   0  801.72   19.70
   2  -4   0  829.02   19.50
   2  -4   0  817.22   19.20
   2  -4   0  833.32   19.20
  -2   4   0  819.42   19.70
  -2   4   0  818.62   19.50
  -2   4   0  823.42   19.70
  -2   4   0  804.12   19.40
  -2   4   0  851.51   19.10
  -2   4   0  810.92   19.20
  -2   4   0  855.71   18.90
   1  -4   0  282.17    7.10
   1  -4   0  277.27    7.40
   1  -4   0  286.77    8.00
   1  -4   0  278.17    7.20
  -1   4   0  274.57    7.40
  -1   4   0  285.87    6.50
  -1   4   0  273.57    7.30
  -1   4   0  280.97    7.50
  -1   4   0  281.07    7.20
  -1   4   0  291.07    7.00
   0  -4   0    4.30    1.30
   0  -4   0    3.20    1.00
   0  -4   0    4.10    0.60
   0  -4   0    3.80    0.90
   0  -4   0    2.80    0.80
   0   4   0    3.20    1.10
   0   4   0    4.70    0.80
   0   4   0    2.40    0.90
   0   4   0    4.30    1.00
   0   4   0    3.50    1.10
   0   4   0    4.50    0.60
  -1  -4   0   66.29    2.50
  -1  -4   0   65.09    2.60
  -1  -4   0   64.29    2.10
  -1  -4   0   69.19    2.50
   1   4   0   60.69    2.70
   1   4   0   68.09    2.00
   1   4   0   68.79    2.70
   1   4   0   65.19    2.50
  -2  -4   0    9.90    1.60
  -2  -4   0   11.30    1.30
  -2  -4   0   13.40    1.40
  -2  -4   0   10.60    1.20
   2   4   0   13.10    1.70
   2   4   0   10.90    1.60
   2   4   0   10.80    1.50
   2   4   0   10.60    1.00
  -3  -4   0  136.79    4.00
  -3  -4   0  131.89    4.60
  -3  -4   0  123.09    4.30
  -3  -4   0  147.39    4.30
   3   4   0  136.39    4.50
   3   4   0  135.29    4.50
   3   4   0  129.49    4.60
  -4  -4   0   25.30    1.90
  -4  -4   0   24.80    2.00
  -4  -4   0   26.40    1.80
   4   4   0   28.90    2.40
   4   4   0   23.50    2.10
  -5  -4   0   21.20    1.90
  -5  -4   0   15.60    1.90
  -5  -4   0   19.40    2.00
   5   4   0   21.30    2.60
   5   4   0   16.20    2.20
  -6  -4   0   42.50    2.70
  -6  -4   0   49.99    2.70
  -6  -4   0   44.40    2.60
  -6  -4   0   36.20    2.60
   6   4   0   45.90    3.40
   6   4   0   38.20    2.90
  -7  -4   0    7.50    1.90
  -7  -4   0    8.80    1.80
  -7  -4   0   11.30    2.00
  -7  -4   0   12.10    2.20
   7   4   0    8.60    1.90
   7   4   0   10.60    2.50
  -8  -4   0   -0.50    1.90
  -8  -4   0    2.40    2.00
  -8  -4   0    0.60    1.60
  -8  -4   0    2.00    1.70
   8   4   0   -0.10    2.10
   8   4   0   -0.30    1.80
  -9  -4   0   19.90    2.90
  -9  -4   0   21.80    3.10
  -9  -4   0   25.50    3.00
  -9  -4   0   22.20    3.20
   9   4   0   26.10    3.70
 -10  -4   0   39.00    3.80
 -10  -4   0   37.30    3.90
 -10  -4   0   32.50    3.80
 -10  -4   0   29.00    3.60
  10   4   0   29.20    4.30
 -11  -4   0   -1.20    2.20
 -11  -4   0   -0.50    2.60
 -11  -4   0    3.80    2.60
 -11  -4   0   -4.60    2.00
  11   4   0   -2.80    2.90
 -12  -4   0    6.70    2.70
 -12  -4   0   -3.50    2.40
 -12  -4   0    3.40    2.90
  12   4   0    2.10    3.00
 -13  -4   0    7.30    2.80
 -13  -4   0   10.30    3.10
  13   4   0    4.00    3.80
 -17   5   0    1.40    2.80
 -17   5   0   12.80    4.30
 -17   5   0    4.20    3.10
 -16   5   0    3.40    2.90
 -16   5   0   -2.40    2.50
 -16   5   0   10.50    4.50
 -15   5   0    1.40    1.90
 -15   5   0    1.50    3.50
 -15   5   0    4.90    2.50
 -15   5   0   -3.10    2.10
 -14   5   0    2.10    2.20
 -14   5   0    5.80    3.70
 -14   5   0    1.70    2.30
 -14   5   0    2.00    1.80
 -13   5   0   26.20    3.30
 -13   5   0   27.30    3.00
 -13   5   0   39.70    4.70
 -13   5   0   25.10    2.50
 -12   5   0   42.30    4.10
 -12   5   0   43.60    3.30
 -12   5   0   38.60    3.20
 -12   5   0   41.90    2.70
 -11   5   0    1.80    1.70
 -11   5   0    1.10    2.30
 -11   5   0    4.30    1.30
 -11   5   0    2.50    1.50
 -11   5   0    4.90    1.30
  10  -5   0   25.70    2.30
 -10   5   0   21.50    2.00
 -10   5   0   23.20    2.90
 -10   5   0   28.10    1.90
 -10   5   0   22.70    2.00
 -10   5   0   19.10    2.30
   9  -5   0  113.39    4.30
  -9   5   0  124.49    4.00
  -9   5   0  112.69    3.10
  -9   5   0  118.59    4.40
  -9   5   0  118.09    3.70
  -9   5   0  118.59    3.00
  -9   5   0  118.79    4.10
  -9   5   0  110.09    5.00
   8  -5   0   -0.40    1.00
  -8   5   0    0.20    0.80
  -8   5   0   -1.40    0.50
  -8   5   0    0.90    1.10
  -8   5   0   -1.40    1.60
  -8   5   0    0.40    0.50
  -8   5   0    0.00    0.70
  -8   5   0    1.60    1.10
   7  -5   0    3.70    1.00
   7  -5   0    4.60    1.10
  -7   5   0    4.80    1.10
  -7   5   0    3.70    0.80
  -7   5   0    2.70    2.00
  -7   5   0    6.10    1.10
  -7   5   0    4.00    0.70
  -7   5   0    3.70    1.10
   6  -5   0    2.50    0.90
  -6   5   0    3.40    0.70
  -6   5   0    2.10    1.00
  -6   5   0    3.40    0.90
  -6   5   0    1.50    1.70
  -6   5   0    2.40    0.90
  -6   5   0    2.20    0.70
   5  -5   0   66.59    2.30
   5  -5   0   70.39    2.50
  -5   5   0   68.99    2.20
  -5   5   0   62.59    3.00
  -5   5   0   67.19    2.70
  -5   5   0   67.69    2.20
  -5   5   0   66.79    2.10
  -5   5   0   65.49    2.50
   4  -5   0   99.99    3.10
   4  -5   0   99.59    2.80
  -4   5   0  102.89    3.30
  -4   5   0   98.89    2.70
  -4   5   0   98.59    3.80
  -4   5   0   96.79    3.30
   3  -5   0   48.80    2.00
   3  -5   0   46.80    2.20
  -3   5   0   48.90    2.20
  -3   5   0   51.99    2.30
  -3   5   0   51.29    1.40
  -3   5   0   50.59    1.80
  -3   5   0   49.99    2.60
  -3   5   0   47.60    2.50
   2  -5   0   44.90    1.90
   2  -5   0   44.80    1.90
   2  -5   0   46.10    2.10
  -2   5   0   43.50    2.40
  -2   5   0   44.60    2.40
  -2   5   0   43.60    1.70
  -2   5   0   41.60    1.30
  -2   5   0   47.60    2.20
  -2   5   0   46.80    2.10
   1  -5   0  399.56    9.90
   1  -5   0  385.46    9.20
   1  -5   0  381.06    9.70
  -1   5   0  397.66    9.00
  -1   5   0  400.56   10.10
  -1   5   0  392.16   10.30
  -1   5   0  393.06   10.00
  -1   5   0  381.06   10.00
   0  -5   0  122.59    3.70
   0  -5   0  121.49    3.20
   0  -5   0  122.99    3.90
   0  -5   0  121.19    3.80
   0   5   0  117.29    3.90
   0   5   0  120.49    3.10
   0   5   0  117.29    4.20
   0   5   0  120.99    4.00
   0   5   0  122.69    4.00
  -1  -5   0 1288.17   30.00
  -1  -5   0 1274.87   30.20
  -1  -5   0 1297.57   29.60
  -1  -5   0 1242.08   30.10
   1   5   0 1313.07   29.40
   1   5   0 1263.17   30.20
   1   5   0 1264.57   30.30
   1   5   0 1280.27   30.60
  -2  -5   0    9.50    1.60
  -2  -5   0    9.80    1.40
  -2  -5   0   10.30    1.60
  -2  -5   0    9.10    1.30
   2   5   0   11.10    1.50
   2   5   0    8.90    1.60
   2   5   0    9.30    1.50
  -3  -5   0  415.96   10.20
  -3  -5   0  394.96   10.70
  -3  -5   0  402.36   11.10
  -3  -5   0  411.36   10.60
   3   5   0  400.26   10.90
   3   5   0  404.16   10.80
   3   5   0  423.56   11.10
  -4  -5   0   70.79    3.10
  -4  -5   0   73.09    3.30
  -4  -5   0   71.89    3.00
   4   5   0   75.19    3.60
   4   5   0   66.99    3.30
  -5  -5   0  116.59    4.40
  -5  -5   0  114.39    4.10
  -5  -5   0  109.49    4.40
   5   5   0  110.09    4.50
   5   5   0  124.79    5.00
  -6  -5   0  156.28    5.50
  -6  -5   0  151.18    5.10
  -6  -5   0  151.08    5.30
   6   5   0  143.79    5.50
   6   5   0  147.29    5.80
  -7  -5   0   20.40    2.50
  -7  -5   0   20.00    2.60
  -7  -5   0   17.40    2.40
  -7  -5   0   19.20    2.60
   7   5   0   20.30    2.70
   7   5   0   18.40    3.00
  -8  -5   0    4.00    2.20
  -8  -5   0    8.00    2.30
  -8  -5   0    4.30    2.00
  -8  -5   0    2.90    2.00
   8   5   0    5.80    2.90
  -9  -5   0    8.90    2.50
  -9  -5   0   14.40    2.90
  -9  -5   0   11.80    2.60
  -9  -5   0   10.10    2.60
   9   5   0    9.50    3.00
 -10  -5   0    1.80    2.30
 -10  -5   0   -1.00    2.60
 -10  -5   0    2.10    2.40
  10   5   0   -2.90    2.70
 -11  -5   0   13.20    3.10
 -11  -5   0    0.90    2.50
  11   5   0    2.70    3.00
 -12  -5   0    1.60    2.80
 -12  -5   0   -1.70    2.50
  12   5   0   -0.10    3.30
 -17   6   0    5.20    3.00
 -17   6   0   11.10    4.70
 -17   6   0    0.50    2.70
 -16   6   0    4.80    2.80
 -16   6   0   15.90    3.30
 -16   6   0   11.40    4.30
 -15   6   0    8.00    4.30
 -15   6   0   -1.40    2.30
 -15   6   0    3.30    2.70
 -14   6   0   58.49    3.40
 -14   6   0   56.39    4.40
 -14   6   0   66.59    4.20
 -14   6   0   78.09    5.90
 -13   6   0   20.00    2.30
 -13   6   0   15.70    2.60
 -13   6   0   18.80    2.60
 -13   6   0   21.40    3.80
 -12   6   0    2.60    1.30
 -12   6   0   -0.10    1.60
 -12   6   0    7.80    3.20
 -12   6   0    0.40    1.70
 -11   6   0    8.70    1.70
 -11   6   0    8.00    1.30
 -11   6   0    7.40    1.40
 -11   6   0    5.30    1.70
 -11   6   0    8.30    2.80
 -10   6   0    7.80    1.70
 -10   6   0    8.50    0.90
 -10   6   0   10.70    1.40
 -10   6   0   11.00    1.00
 -10   6   0   13.20    1.70
 -10   6   0   11.40    1.80
 -10   6   0   14.40    3.00
   9  -6   0    0.60    1.70
  -9   6   0    1.40    0.60
  -9   6   0    0.90    2.20
  -9   6   0    0.00    1.10
  -9   6   0   -0.10    0.90
  -9   6   0    1.40    0.70
  -9   6   0    2.00    0.80
  -9   6   0    0.80    1.20
   8  -6   0   25.20    2.00
  -8   6   0   27.00    1.90
  -8   6   0   20.80    1.40
  -8   6   0   18.00    2.50
  -8   6   0   22.50    1.80
  -8   6   0   26.20    2.20
  -8   6   0   25.60    1.30
   7  -6   0   58.99    2.50
  -7   6   0   57.09    2.30
  -7   6   0   56.49    2.50
  -7   6   0   54.99    2.70
  -7   6   0   56.39    2.10
  -7   6   0   49.00    3.50
   6  -6   0   31.40    1.90
  -6   6   0   32.90    2.90
  -6   6   0   36.10    2.10
  -6   6   0   34.50    2.20
  -6   6   0   35.80    2.20
  -6   6   0   37.00    1.70
  -6   6   0   36.10    1.60
   5  -6   0   80.49    2.80
   5  -6   0   80.09    2.60
  -5   6   0   74.69    3.70
  -5   6   0   78.39    2.40
  -5   6   0   73.59    3.00
  -5   6   0   77.59    3.00
   4  -6   0  372.56    9.20
  -4   6   0  367.16   10.00
  -4   6   0  351.56    9.00
  -4   6   0  372.66   10.20
  -4   6   0  364.76    9.50
  -4   6   0  372.16    9.50
  -4   6   0  370.16    8.70
   3  -6   0  214.58    5.90
   3  -6   0  219.78    6.30
  -3   6   0  219.98    5.20
  -3   6   0  220.58    6.30
  -3   6   0  232.08    5.80
  -3   6   0  225.78    6.70
  -3   6   0  215.18    6.20
  -3   6   0  222.38    6.70
   2  -6   0   32.40    1.90
   2  -6   0   31.80    2.00
   2  -6   0   34.10    1.80
  -2   6   0   33.10    2.40
  -2   6   0   32.80    2.00
  -2   6   0   30.90    2.10
  -2   6   0   31.60    2.30
   1  -6   0  166.78    5.00
   1  -6   0  167.58    4.20
   1  -6   0  169.08    5.10
  -1   6   0  176.18    5.60
  -1   6   0  169.78    4.00
  -1   6   0  166.68    5.30
  -1   6   0  173.08    5.20
  -1   6   0  168.48    5.20
   0  -6   0  202.08    5.70
   0  -6   0  185.38    5.00
   0  -6   0  190.48    5.60
   0  -6   0  196.98    5.60
   0   6   0  198.88    5.80
   0   6   0  192.68    5.80
   0   6   0  186.68    5.80
   0   6   0  193.88    4.80
   0   6   0  193.78    6.20
  -1  -6   0  228.58    6.70
  -1  -6   0  231.28    6.50
  -1  -6   0  231.28    6.00
  -1  -6   0  233.38    6.70
   1   6   0  221.58    5.70
   1   6   0  235.98    6.80
   1   6   0  226.48    6.80
   1   6   0  230.38    7.20
  -2  -6   0    7.50    1.10
  -2  -6   0    5.80    1.50
  -2  -6   0    7.90    1.60
  -2  -6   0    6.20    1.40
   2   6   0    4.00    1.40
   2   6   0    5.70    1.70
   2   6   0    6.00    1.50
  -3  -6   0   43.10    2.20
  -3  -6   0   37.00    2.70
  -3  -6   0   43.60    2.60
   3   6   0   39.40    2.60
   3   6   0   33.70    2.80
  -4  -6   0   -0.70    1.10
  -4  -6   0   -3.00    1.30
  -4  -6   0   -1.30    1.10
   4   6   0    0.50    1.40
   4   6   0   -0.50    1.80
  -5  -6   0    4.30    1.70
  -5  -6   0    4.60    1.50
  -5  -6   0    5.80    1.70
   5   6   0    5.20    2.00
   5   6   0    2.80    1.60
  -6  -6   0    5.70    1.80
  -6  -6   0    6.60    1.80
  -6  -6   0    4.30    1.90
   6   6   0    3.90    1.80
   6   6   0    7.80    2.30
  -7  -6   0   14.10    2.40
  -7  -6   0   12.60    2.30
  -7  -6   0   13.20    2.60
  -7  -6   0   11.20    2.20
   7   6   0   10.60    3.00
   7   6   0   13.10    2.50
  -8  -6   0    0.60    2.10
  -8  -6   0   -4.70    1.80
  -8  -6   0    0.70    2.10
  -8  -6   0    0.80    2.10
   8   6   0    2.80    2.70
  -9  -6   0    3.00    2.40
  -9  -6   0   -1.20    2.20
   9   6   0   -0.80    2.80
 -10  -6   0   12.90    2.90
 -10  -6   0    8.80    2.80
  10   6   0    9.50    3.50
 -11  -6   0    2.70    2.70
 -11  -6   0    2.30    3.00
  11   6   0   -0.50    3.00
 -17   7   0   13.00    4.90
 -17   7   0    2.30    2.50
 -17   7   0   -0.50    2.60
 -16   7   0    1.20    2.60
 -16   7   0   13.40    4.80
 -16   7   0   10.40    2.70
 -15   7   0    6.50    2.50
 -15   7   0    8.90    4.30
 -15   7   0    5.00    2.50
 -14   7   0  194.98    8.70
 -14   7   0  184.68    6.70
 -14   7   0  191.28    7.40
 -13   7   0    8.60    2.20
 -13   7   0    6.00    2.20
 -13   7   0    6.30    1.50
 -13   7   0    9.40    3.60
 -12   7   0   74.99    5.30
 -12   7   0   70.79    3.00
 -12   7   0   75.69    3.80
 -12   7   0   71.09    4.00
 -11   7   0    2.80    1.50
 -11   7   0    3.10    1.00
 -11   7   0    3.10    0.80
 -11   7   0    3.80    1.60
 -11   7   0    7.50    2.60
 -11   7   0    4.10    1.30
 -10   7   0   -1.00    0.60
 -10   7   0   -0.30    1.30
 -10   7   0    0.90    0.80
 -10   7   0    0.40    1.30
 -10   7   0    0.40    1.00
 -10   7   0   -3.00    2.30
 -10   7   0   -0.10    0.80
  -9   7   0    0.70    2.00
  -9   7   0    0.00    0.70
  -9   7   0    0.00    1.10
  -9   7   0   -0.80    0.90
  -9   7   0   -0.70    1.10
  -8   7   0   20.00    1.40
  -8   7   0   18.70    2.70
  -8   7   0   22.90    2.20
  -8   7   0   22.50    1.90
  -8   7   0   18.40    1.70
  -7   7   0   19.20    1.40
  -7   7   0   18.70    2.00
  -7   7   0   14.30    2.70
  -7   7   0   19.60    2.00
  -7   7   0   19.70    1.40
  -7   7   0   18.20    1.80
   6  -7   0  111.09    3.60
  -6   7   0  109.49    3.20
  -6   7   0  107.69    4.80
  -6   7   0  109.49    3.90
  -6   7   0  107.39    3.90
   5  -7   0 1155.08   27.20
  -5   7   0 1144.19   28.30
  -5   7   0 1152.38   26.70
  -5   7   0 1202.68   27.70
  -5   7   0 1165.28   27.00
  -5   7   0 1144.49   28.40
  -5   7   0 1153.58   27.60
   4  -7   0  129.99    4.00
  -4   7   0  129.59    5.00
  -4   7   0  136.69    4.50
  -4   7   0  128.49    3.30
  -4   7   0  129.39    4.90
  -4   7   0  131.49    3.80
  -4   7   0  126.79    4.40
   3  -7   0   19.20    1.80
   3  -7   0   23.00    1.60
  -3   7   0   22.20    2.40
  -3   7   0   22.10    2.10
  -3   7   0   19.30    1.90
  -3   7   0   23.10    2.40
   2  -7   0    5.80    1.20
   2  -7   0    3.10    1.00
   2  -7   0    5.80    1.40
  -2   7   0    3.60    1.40
  -2   7   0    5.50    1.60
  -2   7   0    2.90    1.20
  -2   7   0    2.80    1.60
   1  -7   0    3.10    1.20
   1  -7   0    0.90    1.20
   1  -7   0    3.90    0.70
  -1   7   0    3.40    1.50
  -1   7   0    3.40    1.30
  -1   7   0    3.30    0.40
  -1   7   0    1.80    1.60
  -1   7   0    0.90    1.20
   0  -7   0  124.09    4.20
   0  -7   0  134.19    4.40
   0  -7   0  129.69    4.30
   0  -7   0  124.59    3.60
   0   7   0  130.09    4.60
   0   7   0  127.89    4.40
   0   7   0  127.19    4.90
   0   7   0  123.39    4.50
   0   7   0  124.79    3.30
  -1  -7   0  256.37    7.30
  -1  -7   0  252.17    7.20
  -1  -7   0  258.37    6.60
  -1  -7   0  249.48    7.30
   1   7   0  262.17    7.60
   1   7   0  243.38    7.50
   1   7   0  253.97    7.90
   1   7   0  245.38    6.30
  -2  -7   0    4.90    1.20
  -2  -7   0    5.50    1.50
  -2  -7   0    3.40    1.50
  -2  -7   0    3.40    1.40
   2   7   0    2.70    1.40
   2   7   0    3.90    1.70
   2   7   0    4.20    1.40
  -3  -7   0    0.60    1.10
  -3  -7   0    0.40    1.40
  -3  -7   0   -1.30    1.30
   3   7   0   -1.60    1.70
   3   7   0   -0.60    1.50
  -4  -7   0   25.90    2.40
  -4  -7   0   21.10    2.50
  -4  -7   0   26.30    2.10
   4   7   0   26.90    3.30
   4   7   0   21.30    2.60
  -5  -7   0   -0.60    1.50
  -5  -7   0    2.00    1.90
  -5  -7   0    2.80    1.70
   5   7   0    2.10    2.00
   5   7   0    1.50    1.70
  -6  -7   0   -4.70    1.60
  -6  -7   0   -0.60    1.90
  -6  -7   0   -0.50    1.70
  -6  -7   0   -1.10    1.80
   6   7   0   -3.90    2.30
   6   7   0   -2.00    1.90
  -7  -7   0    2.60    2.20
  -7  -7   0    4.00    2.10
   7   7   0    1.80    2.40
   7   7   0    1.00    2.50
  -8  -7   0    2.50    2.30
  -8  -7   0    3.60    2.30
   8   7   0    1.20    3.20
  -9  -7   0    2.80    2.50
  -9  -7   0    5.70    2.50
   9   7   0   -1.60    2.80
 -10  -7   0   -0.60    2.70
 -10  -7   0    4.60    2.70
  10   7   0    3.70    3.80
 -17   8   0   11.80    3.10
 -17   8   0    8.30    2.90
 -17   8   0   29.80    5.80
 -16   8   0   11.40    3.00
 -16   8   0   10.10    4.60
 -16   8   0    5.00    2.60
 -15   8   0    4.30    2.40
 -15   8   0    0.20    2.40
 -15   8   0    5.20    3.80
 -14   8   0   15.80    4.50
 -14   8   0   10.10    2.50
 -14   8   0   11.60    2.70
 -13   8   0   -3.40    3.30
 -13   8   0    2.10    2.00
 -13   8   0   -2.70    1.60
 -12   8   0   -0.30    1.60
 -12   8   0    0.80    1.00
 -12   8   0    1.70    2.80
 -12   8   0    2.70    1.80
 -11   8   0   91.79    3.70
 -11   8   0   89.89    4.30
 -11   8   0   90.89    5.60
 -11   8   0   94.79    3.20
 -11   8   0   93.99    3.70
 -11   8   0   97.19    3.20
 -10   8   0   16.60    3.20
 -10   8   0   11.60    1.60
 -10   8   0   13.00    1.80
 -10   8   0   10.10    1.30
 -10   8   0   14.80    2.00
  -9   8   0   20.50    3.00
  -9   8   0   28.10    2.00
  -9   8   0   27.00    2.40
  -9   8   0   29.10    1.60
  -9   8   0   31.30    2.20
  -8   8   0  193.48    6.20
  -8   8   0  204.28    6.00
  -8   8   0  200.58    6.30
  -8   8   0  201.78    5.60
  -8   8   0  192.08    7.30
  -8   8   0  202.38    5.50
  -7   8   0   32.70    1.80
  -7   8   0   33.70    3.30
  -7   8   0   32.70    1.70
  -7   8   0   32.20    2.30
  -7   8   0   33.20    2.40
   6  -8   0    5.10    1.10
  -6   8   0    7.90    2.30
  -6   8   0    5.80    1.40
  -6   8   0    6.40    0.90
  -6   8   0    6.00    1.80
  -6   8   0    6.70    1.40
  -6   8   0    5.00    0.90
   5  -8   0    6.40    1.10
  -5   8   0    7.70    2.00
  -5   8   0    5.60    1.30
  -5   8   0    5.70    0.70
  -5   8   0    6.70    2.10
  -5   8   0    6.20    1.30
   4  -8   0    6.70    1.10
  -4   8   0    7.70    1.50
  -4   8   0   10.30    2.30
  -4   8   0    9.50    1.60
  -4   8   0    6.30    1.80
  -4   8   0    7.60    0.60
   3  -8   0    0.70    1.20
   3  -8   0    0.80    0.90
  -3   8   0    0.10    1.60
  -3   8   0    0.70    1.10
  -3   8   0    3.50    1.70
  -3   8   0    0.70    1.10
   2  -8   0  195.08    5.70
   2  -8   0  191.98    5.50
   2  -8   0  174.38    6.90
  -2   8   0  180.48    6.30
  -2   8   0  177.18    6.10
  -2   8   0  189.98    5.90
  -2   8   0  184.78    6.00
   1  -8   0    8.70    1.60
   1  -8   0   11.20    1.60
   1  -8   0    7.70    1.00
  -1   8   0    9.70    1.80
  -1   8   0    7.60    1.60
  -1   8   0   10.40    1.90
  -1   8   0    7.50    1.90
  -1   8   0    8.00    0.60
   0  -8   0    3.40    1.50
   0  -8   0    1.10    1.00
   0  -8   0    2.20    0.90
   0  -8   0    4.20    1.30
   0   8   0    2.30    1.30
   0   8   0    1.70    1.60
   0   8   0    1.50    1.40
   0   8   0    1.50    1.40
   0   8   0    1.50    0.50
  -1  -8   0   17.40    2.00
  -1  -8   0   17.90    1.60
  -1  -8   0   18.20    2.10
  -1  -8   0   18.40    1.80
   1   8   0   15.00    2.40
   1   8   0   17.90    2.10
   1   8   0   13.20    1.90
  -2  -8   0    1.20    1.60
  -2  -8   0    2.10    1.20
  -2  -8   0    2.10    1.30
   2   8   0    1.20    1.50
   2   8   0    4.00    1.60
   2   8   0    3.10    1.90
  -3  -8   0    6.70    1.70
  -3  -8   0    5.50    1.80
  -3  -8   0    7.00    1.50
   3   8   0    6.70    2.20
   3   8   0    4.80    1.90
  -4  -8   0   33.50    3.10
  -4  -8   0   35.20    2.90
  -4  -8   0   34.20    2.70
   4   8   0   35.40    3.50
   4   8   0   39.90    3.50
  -5  -8   0  113.39    5.50
  -5  -8   0  115.19    4.60
   5   8   0  109.79    5.30
   5   8   0  114.59    5.60
  -6  -8   0   28.80    3.80
  -6  -8   0   30.00    2.90
   6   8   0   36.20    4.30
   6   8   0   29.20    3.40
  -7  -8   0    6.50    2.30
  -7  -8   0    6.00    2.70
   7   8   0    4.70    3.20
  -8  -8   0   16.50    3.00
  -8  -8   0    9.10    2.90
   8   8   0    9.40    3.60
  -9  -8   0    5.80    2.60
  -9  -8   0    2.40    2.80
   9   8   0   -0.50    3.10
 -17   9   0    1.50    2.50
 -17   9   0   11.00    5.00
 -17   9   0    0.50    2.60
 -16   9   0   19.30    4.70
 -16   9   0   18.00    3.20
 -16   9   0   10.90    3.00
 -15   9   0   10.80    4.50
 -15   9   0    3.70    2.50
 -15   9   0    4.60    2.40
 -14   9   0    3.00    2.00
 -14   9   0   -0.60    3.80
 -14   9   0    1.50    1.90
 -13   9   0   23.20    3.20
 -13   9   0   26.80    2.90
 -13   9   0   34.20    5.00
 -12   9   0   30.60    3.10
 -12   9   0   27.90    2.70
 -12   9   0   30.50    4.50
 -11   9   0   72.09    3.30
 -11   9   0   73.39    3.90
 -11   9   0   73.79    3.30
 -11   9   0   82.09    5.50
 -11   9   0   66.49    2.70
 -10   9   0    6.50    1.40
 -10   9   0    9.30    1.90
 -10   9   0    6.30    1.10
 -10   9   0    6.40    1.70
 -10   9   0    5.70    3.00
 -10   9   0    8.90    1.50
  -9   9   0    0.80    0.90
  -9   9   0    1.80    1.30
  -9   9   0    2.70    2.30
  -9   9   0    0.90    1.30
  -9   9   0    1.70    1.20
  -9   9   0    0.10    1.10
  -8   9   0   11.90    3.00
  -8   9   0    8.10    1.50
  -8   9   0    8.60    1.50
  -8   9   0   10.10    1.40
  -8   9   0    9.00    1.20
  -8   9   0    9.50    1.40
  -7   9   0    2.00    1.20
  -7   9   0    1.50    0.80
  -7   9   0    2.10    1.20
  -7   9   0    4.10    2.40
  -7   9   0    1.90    1.80
  -6   9   0   10.10    1.10
  -6   9   0   14.80    2.10
  -6   9   0   10.70    2.70
  -6   9   0   13.30    2.10
  -6   9   0    9.50    2.30
   5  -9   0    4.80    1.10
  -5   9   0    5.60    1.40
  -5   9   0    5.40    1.90
  -5   9   0    5.90    1.40
  -5   9   0    8.80    2.40
  -5   9   0    5.30    0.70
   4  -9   0   27.40    1.90
  -4   9   0   27.30    2.90
  -4   9   0   28.70    2.50
  -4   9   0   31.00    3.00
  -4   9   0   21.90    2.30
   3  -9   0    3.20    1.50
   3  -9   0    3.20    1.20
  -3   9   0    2.10    1.40
  -3   9   0    3.30    1.40
  -3   9   0    3.20    2.10
  -3   9   0    4.60    2.00
   2  -9   0    2.20    1.10
   2  -9   0    2.20    1.40
  -2   9   0    3.70    1.80
  -2   9   0    3.10    1.40
  -2   9   0    2.80    1.70
  -2   9   0    0.60    1.30
   1  -9   0   -0.50    1.20
  -1   9   0   -0.50    1.30
  -1   9   0    0.80    1.40
  -1   9   0    1.50    1.60
  -1   9   0    0.10    0.40
  -1   9   0   -0.10    1.60
   0  -9   0   16.70    2.20
   0  -9   0   19.20    2.20
   0  -9   0   17.90    1.50
   0  -9   0   16.60    2.60
   0   9   0   20.00    2.50
   0   9   0   20.00    2.60
   0   9   0   21.70    2.90
   0   9   0   12.90    1.10
  -1  -9   0   22.70    1.80
  -1  -9   0   19.80    2.10
  -1  -9   0   25.90    2.80
   1   9   0   26.50    3.30
   1   9   0   24.50    2.80
  -2  -9   0    7.90    2.20
  -2  -9   0   11.50    1.60
   2   9   0    5.30    2.00
   2   9   0    9.50    2.40
  -3  -9   0   11.50    2.40
  -3  -9   0   15.60    2.20
   3   9   0   21.90    3.20
   3   9   0   12.10    3.00
  -4  -9   0    8.00    2.40
  -4  -9   0   11.80    2.00
   4   9   0    7.10    2.50
   4   9   0    9.00    3.00
  -5  -9   0   41.10    3.10
  -5  -9   0   37.30    4.00
   5   9   0   30.80    4.30
   5   9   0   33.20    3.50
  -6  -9   0    2.20    2.80
   6   9   0    2.10    2.50
   6   9   0    4.00    2.70
  -7  -9   0    2.10    2.60
   7   9   0    3.70    3.00
  -8  -9   0    4.10    2.80
   8   9   0    0.00    3.00
 -17  10   0    4.00    2.40
 -17  10   0    4.70    2.60
 -17  10   0   10.00    4.40
 -16  10   0    1.50    2.20
 -16  10   0   12.00    4.80
 -16  10   0    0.30    2.30
 -15  10   0   10.40    2.60
 -15  10   0   18.30    5.00
 -15  10   0   12.40    2.70
 -14  10   0    2.10    1.90
 -14  10   0    3.20    4.00
 -14  10   0    0.00    2.00
 -13  10   0    3.80    1.90
 -13  10   0    0.60    1.70
 -13  10   0    4.60    3.50
 -12  10   0   10.60    2.20
 -12  10   0   10.60    2.00
 -12  10   0   11.80    4.00
 -11  10   0    3.30    1.50
 -11  10   0    3.10    1.60
 -11  10   0    3.50    1.70
 -11  10   0    2.90    1.40
 -11  10   0    6.00    3.00
 -10  10   0    2.90    1.30
 -10  10   0    4.10    3.00
 -10  10   0    2.70    1.00
 -10  10   0    3.70    1.40
 -10  10   0    3.50    1.60
 -10  10   0    1.60    1.50
  -9  10   0    1.40    1.30
  -9  10   0    3.60    2.80
  -9  10   0    1.30    1.00
  -9  10   0    1.80    1.30
  -9  10   0    0.10    1.80
  -9  10   0    0.50    1.00
  -8  10   0    4.50    1.00
  -8  10   0    6.10    2.40
  -8  10   0   12.00    3.00
  -8  10   0    7.80    1.60
  -8  10   0    5.50    1.20
  -8  10   0    6.20    1.50
  -7  10   0    5.60    1.60
  -7  10   0    5.40    0.90
  -7  10   0    8.60    2.20
  -7  10   0    6.40    1.50
  -7  10   0    6.90    2.50
  -6  10   0    1.20    1.30
  -6  10   0    2.40    2.20
  -6  10   0    1.80    1.30
  -6  10   0    1.40    1.80
  -6  10   0    2.20    0.60
   5 -10   0    5.30    1.10
  -5  10   0    3.30    1.50
  -5  10   0    7.20    2.40
  -5  10   0    7.00    2.10
  -5  10   0    6.30    1.50
   4 -10   0   16.60    1.70
  -4  10   0   15.00    2.10
  -4  10   0   20.70    2.30
  -4  10   0   20.10    2.90
  -4  10   0   13.60    2.40
   3 -10   0   -2.10    1.30
   3 -10   0    0.90    1.00
  -3  10   0    2.60    1.90
  -3  10   0    1.30    1.80
  -3  10   0    1.40    1.30
  -3  10   0    1.20    1.40
   2 -10   0    7.00    1.30
   2 -10   0    8.00    1.80
  -2  10   0    6.20    2.10
  -2  10   0   11.00    2.20
  -2  10   0    7.20    1.80
  -2  10   0    5.00    1.60
   1 -10   0    8.40    2.00
  -1  10   0    9.90    1.90
  -1  10   0   12.70    2.60
  -1  10   0   13.00    2.20
   0 -10   0    4.70    1.70
   0 -10   0    7.00    1.50
   0  10   0    5.50    1.80
   0  10   0    5.90    2.20
  -1 -10   0   97.89    4.70
   1  10   0  100.99    5.20
   1  10   0  107.59    5.00
  -2 -10   0    4.70    2.20
   2  10   0    5.20    2.70
   2  10   0    4.10    2.30
  -3 -10   0   13.90    2.70
   3  10   0   11.80    2.90
   3  10   0   10.20    2.70
  -4 -10   0    2.00    2.40
   4  10   0   -0.50    2.20
   4  10   0    2.80    2.50
  -5 -10   0   -1.70    2.70
   5  10   0   -3.10    1.90
   5  10   0    0.60    3.00
  -6 -10   0    0.40    2.90
   6  10   0   -2.90    3.00
  -7 -10   0   -2.40    3.10
   7  10   0   -0.70    3.30
 -17  11   0    7.80    2.80
 -17  11   0    9.60    5.00
 -17  11   0    0.50    2.40
 -16  11   0   17.60    2.80
 -16  11   0   16.70    4.80
 -16  11   0    8.50    2.50
 -15  11   0   13.90    2.70
 -15  11   0   27.40    5.80
 -15  11   0   14.90    2.60
 -14  11   0    2.90    2.00
 -14  11   0    9.00    4.10
 -14  11   0    3.00    2.00
 -13  11   0   22.10    4.40
 -13  11   0   18.60    2.80
 -13  11   0   21.60    2.50
 -13  11   0   20.60    3.10
 -12  11   0    0.20    1.80
 -12  11   0   -2.10    3.40
 -12  11   0    1.90    1.60
 -12  11   0   -2.00    1.60
 -11  11   0   16.40    2.30
 -11  11   0   13.10    1.90
 -11  11   0   15.10    4.10
 -11  11   0   13.90    2.20
 -10  11   0    0.30    2.10
 -10  11   0    2.70    1.30
 -10  11   0   -1.00    3.00
 -10  11   0    1.20    1.50
 -10  11   0    0.90    1.40
  -9  11   0   24.40    2.50
  -9  11   0   25.30    1.80
  -9  11   0   22.90    1.90
  -9  11   0   23.40    3.90
  -9  11   0   23.50    2.60
  -9  11   0   21.60    3.10
  -8  11   0   35.90    3.60
  -8  11   0   35.20    2.70
  -8  11   0   34.70    1.80
  -8  11   0   35.20    2.90
  -8  11   0   36.60    4.20
  -7  11   0   12.90    2.00
  -7  11   0   10.60    1.80
  -7  11   0   11.20    1.10
  -7  11   0    8.90    2.40
  -7  11   0   14.80    3.10
  -6  11   0  113.39    5.40
  -6  11   0  119.69    5.80
  -6  11   0  110.99    4.60
  -6  11   0  106.39    4.70
  -5  11   0   77.89    4.10
  -5  11   0   86.39    4.80
  -5  11   0   76.79    3.90
  -5  11   0   81.49    4.90
  -4  11   0   11.70    2.60
  -4  11   0    9.50    1.90
  -4  11   0    9.10    2.40
  -4  11   0   10.00    1.90
   3 -11   0   48.10    3.20
  -3  11   0   49.70    3.70
  -3  11   0   49.00    3.90
  -3  11   0   50.19    3.40
   2 -11   0   13.90    2.10
  -2  11   0   15.40    2.60
  -2  11   0   13.50    2.20
  -2  11   0   13.00    2.60
   1 -11   0    5.20    2.00
  -1  11   0    2.90    2.00
  -1  11   0    4.00    2.10
  -1  11   0    4.90    2.40
   0 -11   0   21.50    2.80
   0  11   0   17.30    3.00
   0  11   0   14.00    2.50
  -1 -11   0   19.80    3.00
   1  11   0   19.20    3.00
   1  11   0   18.30    3.40
  -2 -11   0    9.00    2.60
   2  11   0    2.50    2.30
   2  11   0    5.20    2.60
  -3 -11   0    1.40    2.70
   3  11   0    0.50    2.10
   3  11   0    2.00    2.50
  -4 -11   0    3.70    2.70
   4  11   0   -0.60    2.40
   4  11   0    5.10    3.00
  -5 -11   0   21.50    3.80
   5  11   0   17.40    3.20
   5  11   0   16.20    3.80
  -6 -11   0    1.50    2.80
   6  11   0    3.00    3.00
 -17  12   0    3.50    2.40
 -17  12   0    1.20    2.30
 -17  12   0    5.50    4.20
 -16  12   0    0.80    2.20
 -16  12   0   -1.80    2.00
 -16  12   0    6.30    4.60
 -16  12   0    2.40    2.10
 -15  12   0   -0.50    1.90
 -15  12   0    1.50    2.00
 -15  12   0    3.40    2.20
 -15  12   0    6.60    4.60
 -14  12   0    0.00    1.80
 -14  12   0    3.10    1.90
 -14  12   0    3.80    4.40
 -14  12   0    2.70    1.80
 -13  12   0   23.20    2.40
 -13  12   0   22.70    4.40
 -13  12   0   18.60    2.70
 -12  12   0   10.60    2.20
 -12  12   0    7.80    1.80
 -12  12   0   11.10    4.10
 -12  12   0   12.80    3.30
 -11  12   0    4.70    3.70
 -11  12   0    1.00    2.30
 -11  12   0    0.50    1.60
 -11  12   0   -0.80    1.20
 -10  12   0   39.50    3.20
 -10  12   0   39.20    2.50
 -10  12   0   46.50    4.30
 -10  12   0   51.69    5.00
  -9  12   0   17.90    3.80
  -9  12   0   10.60    2.00
  -9  12   0   12.80    3.10
  -9  12   0    9.70    2.00
  -8  12   0  121.49    5.00
  -8  12   0  125.89    5.70
  -8  12   0  117.99    6.00
  -8  12   0  128.19    6.50
  -7  12   0   -1.30    2.50
  -7  12   0    3.00    2.50
  -7  12   0   -1.40    1.40
  -6  12   0   -2.00    1.50
  -6  12   0   -1.60    2.00
  -6  12   0    2.00    2.60
  -5  12   0   19.20    3.00
  -5  12   0   18.90    2.60
  -5  12   0   20.20    3.50
  -4  12   0    5.10    2.40
  -4  12   0   -3.90    1.60
  -4  12   0   -1.00    2.00
   3 -12   0   22.50    2.90
  -3  12   0   24.70    3.10
  -3  12   0   24.70    3.60
  -3  12   0   18.40    2.90
   2 -12   0   26.10    3.20
  -2  12   0   16.40    2.40
  -2  12   0   17.30    3.10
   1 -12   0   22.60    3.30
  -1  12   0   19.40    2.90
  -1  12   0   21.30    3.30
   0 -12   0   26.60    3.60
   0  12   0   30.20    3.70
   0  12   0   20.40    3.40
  -1 -12   0   60.59    4.60
   1  12   0   53.19    4.60
   1  12   0   58.09    4.40
  -2 -12   0    1.50    2.70
   2  12   0    3.40    2.40
   2  12   0    3.70    2.80
  -3 -12   0   -0.70    2.70
   3  12   0    2.40    3.10
   3  12   0   -0.70    2.40
  -4 -12   0   -2.90    2.90
   4  12   0   -4.60    2.00
   4  12   0   -3.70    2.60
  -5 -12   0    1.10    2.90
   5  12   0   -1.60    2.80
 -16  13   0   -2.10    1.90
 -16  13   0   14.00    5.20
 -16  13   0    1.70    2.10
 -15  13   0   -2.30    1.80
 -15  13   0   -2.80    1.80
 -15  13   0    5.20    4.40
 -14  13   0   15.30    2.50
 -14  13   0   23.70    5.50
 -13  13   0    6.50    3.00
 -13  13   0    3.80    4.10
 -13  13   0    4.10    1.90
 -12  13   0   21.70    3.90
 -12  13   0   17.10    4.70
 -12  13   0   16.80    2.40
 -11  13   0    6.30    1.90
 -11  13   0    2.20    3.60
 -11  13   0   -1.10    2.90
 -10  13   0    4.00    2.60
 -10  13   0   -0.40    1.50
 -10  13   0    7.50    3.50
  -9  13   0    2.90    3.20
  -9  13   0    1.70    2.60
  -9  13   0   -0.80    1.50
  -8  13   0    7.40    3.30
  -8  13   0    0.30    1.60
  -8  13   0   -2.60    2.30
  -7  13   0    4.30    1.90
  -7  13   0    2.80    2.50
  -7  13   0    7.30    3.20
  -6  13   0   45.90    4.60
  -6  13   0   37.70    4.50
  -6  13   0   39.30    3.40
  -5  13   0   23.70    3.70
  -5  13   0   24.60    3.80
  -5  13   0   18.90    2.90
  -4  13   0   15.20    2.50
  -4  13   0    6.90    2.80
   3 -13   0   37.40    3.50
  -3  13   0   39.90    3.50
  -3  13   0   29.50    3.90
   2 -13   0   42.30    3.80
  -2  13   0   40.80    4.20
  -2  13   0   33.70    3.50
   1 -13   0    4.30    2.50
  -1  13   0    3.30    2.10
  -1  13   0    8.50    3.00
   0 -13   0   14.00    2.80
   0  13   0    9.90    3.10
   0  13   0   15.70    2.90
  -1 -13   0   -2.00    2.30
   1  13   0    1.20    2.70
   1  13   0    0.40    2.40
  -2 -13   0    3.20    2.70
   2  13   0    1.80    2.30
   2  13   0    2.00    3.20
  -3 -13   0    1.00    2.70
   3  13   0   -2.50    2.40
   3  13   0    0.00    2.90
  -4 -13   0   -0.10    3.20
   4  13   0    5.80    3.20
   4  13   0    3.30    5.00
 -16  14   0   -0.50    1.90
 -16  14   0    7.30    4.40
 -15  14   0    9.50    4.50
 -15  14   0    5.80    2.20
 -15  14   0    2.40    3.50
 -14  14   0    2.10    1.80
 -14  14   0    2.80    4.40
 -14  14   0   -0.10    2.80
 -13  14   0    5.00    2.00
 -13  14   0    3.90    3.40
 -13  14   0   16.60    4.80
 -12  14   0    0.00    3.70
 -12  14   0    0.90    1.70
 -12  14   0    4.90    3.20
 -11  14   0   -0.20    2.70
 -11  14   0    1.00    1.60
 -11  14   0    6.00    3.70
 -10  14   0   18.50    4.40
 -10  14   0   18.80    3.50
 -10  14   0   17.50    2.40
  -9  14   0   61.69    5.00
  -9  14   0   56.59    5.30
  -9  14   0   57.49    3.80
  -8  14   0   44.00    3.50
  -8  14   0   53.29    5.20
  -8  14   0   40.90    4.60
  -7  14   0   11.50    3.10
  -7  14   0   19.60    3.00
  -7  14   0   16.60    3.90
  -6  14   0    3.70    2.00
  -6  14   0    5.40    2.80
  -5  14   0   44.70    4.90
  -5  14   0   39.70    3.50
  -4  14   0    5.00    2.20
  -4  14   0    4.70    3.10
  -3  14   0    9.90    3.10
  -3  14   0    6.10    2.30
   2 -14   0   15.30    3.00
  -2  14   0   14.90    3.40
  -2  14   0   13.50    2.70
   1 -14   0   26.20    3.50
  -1  14   0   19.30    3.20
  -1  14   0   15.10    3.50
   0 -14   0    2.10    2.70
   0  14   0    1.30    2.40
   0  14   0    1.80    2.70
  -1 -14   0    4.70    3.10
   1  14   0    3.80    2.90
   1  14   0    0.80    2.60
  -2 -14   0    0.60    2.70
   2  14   0    2.70    2.70
   2  14   0   -2.00    2.90
 -15  15   0   10.60    4.30
 -15  15   0    6.80    2.10
 -15  15   0    2.50    3.70
 -14  15   0    2.70    3.20
 -14  15   0    6.10    4.30
 -14  15   0   -1.60    1.70
 -13  15   0    6.20    4.40
 -13  15   0    3.50    3.50
 -13  15   0    4.60    1.90
 -12  15   0    5.40    3.20
 -12  15   0    3.00    1.80
 -12  15   0   10.80    4.30
 -11  15   0   -0.50    2.80
 -11  15   0    5.10    3.80
 -11  15   0   -1.40    1.70
 -10  15   0    1.50    2.90
 -10  15   0    5.00    3.60
 -10  15   0    3.30    1.90
  -9  15   0   42.10    4.90
  -9  15   0   52.09    3.70
  -9  15   0   55.69    5.50
  -8  15   0   -3.10    2.30
  -8  15   0    1.30    1.90
  -7  15   0   10.90    3.40
  -7  15   0    6.50    2.20
  -6  15   0   -1.00    2.60
  -6  15   0   -1.30    1.90
  -5  15   0    0.20    2.60
  -5  15   0    1.30    2.10
  -4  15   0    3.60    2.90
  -4  15   0    3.90    2.30
  -3  15   0    2.10    2.90
  -3  15   0   -1.00    2.20
   2 -15   0    0.70    2.50
  -2  15   0    2.50    2.40
  -2  15   0    3.00    2.90
   1 -15   0    0.50    2.40
  -1  15   0   -1.20    2.80
  -1  15   0    5.20    2.60
   0 -15   0   -3.90    2.60
   0  15   0   -3.40    2.50
   0  15   0   -0.80    3.20
   1  15   0   -1.50    2.50
 -14  16   0   19.70    5.30
 -14  16   0    9.40    3.70
 -14  16   0   11.90    2.20
 -13  16   0    7.80    2.10
 -13  16   0    0.70    3.00
 -13  16   0   10.00    4.40
 -12  16   0   11.50    4.30
 -12  16   0    5.80    2.00
 -12  16   0    1.20    3.10
 -11  16   0    0.50    1.80
 -11  16   0    6.70    4.70
 -11  16   0    0.70    3.00
 -10  16   0    9.80    2.20
 -10  16   0    9.00    3.50
  -9  16   0    0.70    2.00
  -9  16   0    0.20    2.90
  -8  16   0    2.90    3.00
  -8  16   0    3.10    2.10
  -7  16   0    1.20    2.10
  -7  16   0   -1.10    2.60
  -6  16   0    1.50    2.20
  -6  16   0   -2.60    2.50
  -5  16   0    3.00    2.90
  -5  16   0   -1.40    2.00
  -4  16   0    7.60    2.40
  -4  16   0    4.30    3.20
  -3  16   0    0.90    2.50
  -3  16   0    2.20    3.00
  -2  16   0    1.60    2.60
  -2  16   0    4.80    3.60
 -12  17   0    0.90    3.50
 -12  17   0   -0.10    1.80
 -11  17   0    2.10    1.90
 -11  17   0   -2.90    2.90
 -10  17   0    3.50    2.00
 -10  17   0    0.70    3.50
  -9  17   0    3.90    2.10
  -9  17   0   -2.70    3.10
  -8  17   0    0.60    2.00
  -8  17   0    0.90    3.00
  -7  17   0    4.20    2.20
  -7  17   0   -3.30    2.60
  -6  17   0    1.30    2.20
  -6  17   0   -2.10    3.20
  -5  17   0   -0.80    2.20
  -5  17   0    2.90    3.40
  -4  17   0    5.20    2.60
  -4  17  -1    2.10    3.20
  -4  17  -1    3.50    2.50
  -5  17  -1    0.60    2.30
  -5  17  -1    1.60    3.40
  -6  17  -1   -1.30    2.00
  -6  17  -1    0.00    3.40
  -7  17  -1   -0.10    3.00
  -7  17  -1    1.30    2.00
  -8  17  -1    2.80    2.10
  -8  17  -1   -3.90    2.70
  -9  17  -1    0.70    1.80
  -9  17  -1    2.10    3.10
 -10  17  -1    0.40    3.20
 -10  17  -1    3.60    1.90
 -11  17  -1   -2.20    3.50
 -11  17  -1    1.40    1.70
 -12  17  -1    2.50    3.60
 -12  17  -1    3.70    1.80
  -1  16  -1    3.50    3.60
  -1  16  -1    5.10    2.90
   1 -16   1   10.90    3.00
  -2  16  -1   -0.10    2.40
  -2  16  -1   -0.30    3.20
  -3  16  -1    2.30    2.50
  -3  16  -1    3.30    3.30
  -4  16  -1    2.90    3.00
  -4  16  -1    2.70    2.20
  -5  16  -1    0.10    2.10
  -5  16  -1   -3.60    2.60
  -6  16  -1    0.20    2.00
  -6  16  -1    0.20    2.80
  -7  16  -1   -0.40    2.70
  -7  16  -1    2.30    2.00
  -8  16  -1    1.90    2.90
  -8  16  -1   -0.20    1.70
  -9  16  -1    6.30    3.50
  -9  16  -1    4.50    1.90
 -10  16  -1    7.30    3.40
 -10  16  -1    9.30    2.20
 -11  16  -1   19.50    7.00
 -11  16  -1    5.20    1.90
 -11  16  -1    2.80    3.30
 -12  16  -1   -2.20    2.90
 -12  16  -1    3.30    1.70
 -12  16  -1    6.50    4.00
 -13  16  -1   12.10    2.10
 -13  16  -1    0.20    3.50
 -13  16  -1   17.20    4.80
 -14  16  -1    4.50    1.80
 -14  16  -1    5.70    3.50
 -14  16  -1   14.10    4.70
   1  15  -1    0.00    2.60
   1  15  -1    1.00    3.40
  -1 -15   1   -2.60    2.80
   0  15  -1   12.90    3.90
   0  15  -1   10.90    3.00
   0 -15   1   11.30    3.40
  -1  15  -1    0.10    2.30
  -1  15  -1    0.10    2.90
   1 -15   1   -0.60    2.30
  -2  15  -1   -0.70    2.10
  -2  15  -1   -0.50    2.70
   2 -15   1    3.30    2.30
  -3  15  -1    0.40    2.20
  -3  15  -1    1.60    3.20
  -4  15  -1    5.10    2.20
  -4  15  -1    9.00    3.10
  -5  15  -1    0.60    2.90
  -5  15  -1    1.80    2.10
  -6  15  -1    1.40    1.90
  -6  15  -1    1.50    2.80
  -7  15  -1    6.50    3.10
  -7  15  -1    2.40    1.80
  -8  15  -1    0.60    1.70
  -8  15  -1    0.10    2.60
  -9  15  -1    7.00    3.60
  -9  15  -1    4.30    3.00
  -9  15  -1    2.80    1.70
 -10  15  -1    4.20    1.80
 -10  15  -1    0.90    3.10
 -10  15  -1    1.80    3.40
 -11  15  -1    1.00    1.70
 -11  15  -1    3.60    2.90
 -11  15  -1    7.00    3.70
 -12  15  -1    1.10    1.60
 -12  15  -1   -1.50    2.80
 -12  15  -1    8.30    4.10
 -13  15  -1    9.60    4.40
 -13  15  -1    2.80    1.70
 -13  15  -1    2.40    3.40
 -14  15  -1    4.50    1.80
 -14  15  -1    9.60    4.60
 -14  15  -1    8.90    3.90
 -15  15  -1    9.40    4.00
 -15  15  -1   12.80    5.10
 -15  15  -1    9.20    2.10
   2  14  -1    3.70    3.10
   2  14  -1    4.90    2.80
  -2 -14   1    2.40    3.20
   1  14  -1    1.40    2.60
   1  14  -1    5.50    3.00
  -1 -14   1    2.60    2.60
   0  14  -1    6.10    2.60
   0  14  -1    5.10    3.40
   0 -14   1    4.60    2.80
  -1  14  -1    1.60    2.30
  -1  14  -1    1.10    2.60
   1 -14   1    0.70    2.30
  -2  14  -1    0.80    2.20
  -2  14  -1    1.60    2.70
   2 -14   1    5.80    2.60
  -3  14  -1   18.40    2.90
  -3  14  -1   14.80    3.50
  -4  14  -1   -0.50    2.80
  -4  14  -1    1.50    2.00
  -5  14  -1   32.30    4.10
  -5  14  -1   31.40    3.20
  -6  14  -1   20.40    3.60
  -6  14  -1   14.80    2.40
  -7  14  -1    0.60    1.70
  -7  14  -1   -0.40    2.80
  -7  14  -1    0.50    2.80
  -8  14  -1    2.50    2.70
  -8  14  -1    4.60    3.00
  -8  14  -1    2.60    1.80
  -9  14  -1    9.80    2.00
  -9  14  -1    4.20    2.90
  -9  14  -1   11.10    3.70
 -10  14  -1    9.50    3.70
 -10  14  -1    6.10    1.90
 -10  14  -1    7.40    3.30
 -11  14  -1    1.30    2.80
 -11  14  -1    8.70    3.70
 -11  14  -1    2.20    1.60
 -12  14  -1    4.10    3.80
 -12  14  -1   -0.10    1.50
 -12  14  -1   -0.30    2.70
 -13  14  -1   28.30    5.30
 -13  14  -1   17.20    2.40
 -13  14  -1   15.20    3.90
 -14  14  -1   18.80    5.20
 -14  14  -1   14.40    4.00
 -14  14  -1   10.20    2.10
 -15  14  -1    6.50    2.00
 -15  14  -1   15.20    5.30
 -15  14  -1    2.00    3.50
 -16  14  -1   -0.70    1.90
 -16  14  -1   17.10    5.30
   4  13  -1   -5.80    2.40
   4  13  -1    1.10    3.10
  -4 -13   1    0.70    2.90
   3  13  -1    4.40    3.00
   3  13  -1    1.20    2.30
  -3 -13   1    6.10    3.10
   2  13  -1    5.80    2.50
   2  13  -1    9.00    3.40
  -2 -13   1    1.00    2.50
   1  13  -1   -4.30    2.40
   1  13  -1    3.10    2.50
  -1 -13   1   -0.20    2.60
   0  13  -1    8.10    2.30
   0  13  -1    7.10    2.90
   0 -13   1    3.70    2.30
  -1  13  -1    7.00    3.20
  -1  13  -1    8.70    2.50
   1 -13   1    5.10    2.30
  -2  13  -1   41.10    3.60
  -2  13  -1   46.30    4.40
   2 -13   1   46.80    4.00
  -3  13  -1    3.60    2.00
  -3  13  -1    1.60    2.30
  -4  13  -1    1.80    1.90
  -4  13  -1    4.20    2.50
  -5  13  -1   11.40    2.90
  -5  13  -1    9.80    2.10
  -5  13  -1   12.50    3.00
  -6  13  -1   15.70    2.30
  -6  13  -1   19.40    3.60
  -6  13  -1   17.90    3.30
  -7  13  -1   32.80    4.00
  -7  13  -1   37.90    3.10
  -7  13  -1   40.70    4.40
  -8  13  -1   20.10    2.70
  -8  13  -1   25.60    3.60
  -8  13  -1   19.80    3.80
  -9  13  -1   74.79    5.40
  -9  13  -1   70.79    5.10
  -9  13  -1   65.69    3.70
 -10  13  -1   16.10    3.40
 -10  13  -1   21.30    4.10
 -10  13  -1   18.90    2.60
 -11  13  -1   23.40    2.80
 -11  13  -1   26.80    4.60
 -11  13  -1   31.90    4.20
 -12  13  -1   -0.30    2.60
 -12  13  -1    1.90    1.60
 -12  13  -1    3.70    3.80
 -13  13  -1    0.90    2.70
 -13  13  -1    4.90    4.10
 -13  13  -1    1.00    1.60
 -14  13  -1   10.60    4.50
 -15  13  -1    1.40    1.80
 -15  13  -1    8.00    4.50
 -16  13  -1    0.40    2.00
 -16  13  -1   -3.10    1.90
 -16  13  -1    5.00    4.10
   5  12  -1    4.50    3.20
  -5 -12   1   -0.80    2.80
   4  12  -1    9.80    3.30
   4  12  -1    5.30    2.60
  -4 -12   1    5.70    3.20
   3  12  -1    5.20    2.70
   3  12  -1    7.80    3.00
  -3 -12   1    8.40    2.80
   2  12  -1    2.10    2.70
   2  12  -1    1.30    2.20
  -2 -12   1    2.40    2.70
   1  12  -1   34.90    4.50
   1  12  -1   35.70    3.80
  -1 -12   1   38.00    4.10
   0  12  -1    0.10    1.90
   0  12  -1    1.30    2.40
   0 -12   1    1.00    2.10
  -1  12  -1    0.30    1.70
  -1  12  -1    1.90    2.30
   1 -12   1    3.10    2.10
  -2  12  -1    3.80    1.90
  -2  12  -1    5.20    2.70
   2 -12   1    3.40    2.10
  -3  12  -1   13.90    2.80
  -3  12  -1   14.20    2.80
  -3  12  -1   13.40    2.30
  -4  12  -1    2.90    2.20
  -4  12  -1   -2.80    1.90
  -4  12  -1    1.20    1.60
  -5  12  -1   18.20    3.30
  -5  12  -1   17.70    2.50
  -5  12  -1   20.20    3.30
  -6  12  -1   -0.10    1.40
  -6  12  -1   -1.60    2.20
  -6  12  -1    0.80    2.10
  -6  12  -1    1.60    1.70
  -7  12  -1   20.70    2.60
  -7  12  -1   19.90    3.70
  -7  12  -1   21.30    2.40
  -7  12  -1   20.30    3.20
  -8  12  -1    3.20    2.40
  -8  12  -1    1.70    2.60
  -8  12  -1    2.30    1.50
  -8  12  -1    0.10    1.40
  -9  12  -1    8.50    3.30
  -9  12  -1    7.40    1.20
  -9  12  -1    9.40    1.80
  -9  12  -1    5.70    2.80
  -9  12  -1    5.40    1.60
  -9  12  -1    7.00    1.50
 -10  12  -1    1.10    3.00
 -10  12  -1    0.80    1.50
 -10  12  -1    1.30    2.60
 -10  12  -1    2.20    1.50
 -10  12  -1    1.10    1.20
 -11  12  -1    4.40    1.70
 -11  12  -1    3.10    1.40
 -11  12  -1    8.00    3.30
 -11  12  -1    3.70    1.50
 -11  12  -1    0.70    2.40
 -12  12  -1   11.80    4.10
 -12  12  -1    7.00    1.80
 -12  12  -1    6.00    1.70
 -12  12  -1    8.10    3.00
 -13  12  -1   48.10    3.50
 -13  12  -1   48.80    5.10
 -13  12  -1   55.29    3.20
 -14  12  -1    3.20    2.00
 -14  12  -1    1.90    1.80
 -14  12  -1    1.60    1.80
 -14  12  -1    4.80    4.10
 -15  12  -1    1.90    2.10
 -15  12  -1   -0.30    1.80
 -15  12  -1    1.30    3.70
 -15  12  -1    1.00    1.90
 -16  12  -1    0.20    2.30
 -16  12  -1    0.10    2.00
 -16  12  -1    4.80    4.50
 -17  12  -1    1.10    2.20
 -17  12  -1    3.60    2.40
 -17  12  -1    6.30    4.70
   7  11  -1    5.40    3.90
   6  11  -1    0.60    2.90
  -6 -11   1    0.00    2.90
   5  11  -1    4.90    2.50
   5  11  -1    9.00    3.20
  -5 -11   1   14.90    3.30
   4  11  -1    9.90    2.80
   4  11  -1   17.90    3.70
  -4 -11   1    9.40    3.00
   3  11  -1    1.00    2.10
   3  11  -1    0.10    2.40
  -3 -11   1    0.30    2.60
   2  11  -1    0.40    2.20
   2  11  -1   -1.30    2.30
  -2 -11   1    0.50    2.20
   1  11  -1   34.70    3.80
   1  11  -1   30.90    3.10
  -1 -11   1   30.00    3.30
   0  11  -1  130.99    5.40
   0  11  -1  136.39    6.20
   0 -11   1  142.39    5.70
  -1  11  -1   57.79    3.70
  -1  11  -1   48.00    4.30
   1 -11   1   53.59    3.70
  -2  11  -1   17.40    2.50
  -2  11  -1   19.50    3.00
  -2  11  -1   17.20    2.50
   2 -11   1   16.00    2.30
  -3  11  -1   -2.20    1.70
  -3  11  -1    0.20    1.70
  -3  11  -1   -2.60    1.30
   3 -11   1    1.50    1.60
  -4  11  -1   10.90    1.90
  -4  11  -1    4.90    2.20
  -4  11  -1   11.80    1.90
  -4  11  -1   12.10    2.50
  -5  11  -1   10.80    2.40
  -5  11  -1    8.80    1.80
  -5  11  -1   10.50    1.80
  -5  11  -1   16.70    2.90
  -6  11  -1    7.10    1.60
  -6  11  -1    8.50    2.30
  -6  11  -1    5.40    0.70
  -6  11  -1    5.90    1.50
  -6  11  -1   10.40    2.70
  -7  11  -1    6.00    2.60
  -7  11  -1    1.40    1.30
  -7  11  -1    1.90    2.00
  -7  11  -1    0.70    0.80
  -7  11  -1    3.70    1.50
  -8  11  -1    7.00    1.60
  -8  11  -1    6.40    1.50
  -8  11  -1    6.60    2.30
  -8  11  -1    9.30    2.90
  -8  11  -1    6.30    1.10
  -9  11  -1    3.30    1.10
  -9  11  -1    5.60    2.80
  -9  11  -1    3.30    1.20
  -9  11  -1    3.70    2.50
  -9  11  -1    4.50    1.50
  -9  11  -1    3.60    1.50
 -10  11  -1   10.50    1.50
 -10  11  -1   11.80    3.50
 -10  11  -1    9.20    1.50
 -10  11  -1    8.60    2.90
 -10  11  -1    7.80    1.60
 -10  11  -1    8.30    1.80
 -11  11  -1   25.80    3.90
 -11  11  -1   26.90    2.30
 -11  11  -1   26.60    2.70
 -11  11  -1   23.40    2.10
 -12  11  -1   28.50    2.60
 -12  11  -1   31.70    3.00
 -12  11  -1   38.30    5.00
 -12  11  -1   30.60    3.00
 -13  11  -1   58.99    5.30
 -13  11  -1   65.79    4.10
 -13  11  -1   60.49    3.40
 -13  11  -1   58.89    3.90
 -14  11  -1   25.30    4.50
 -14  11  -1    9.60    2.30
 -14  11  -1   12.90    2.40
 -15  11  -1    7.60    4.40
 -15  11  -1    4.50    2.20
 -15  11  -1    6.10    2.40
 -16  11  -1   15.30    4.90
 -16  11  -1    7.00    2.40
 -16  11  -1   11.10    2.50
 -17  11  -1    3.30    2.40
 -17  11  -1    7.00    4.30
 -17  11  -1    3.70    2.60
   8  10  -1    7.20    3.90
  -8 -10   1   13.20    3.70
   7  10  -1    0.60    3.50
  -7 -10   1    1.80    2.70
   6  10  -1    9.30    3.20
  -6 -10   1   12.70    3.10
   5  10  -1   17.40    3.60
   5  10  -1   16.80    2.90
  -5 -10   1   15.50    3.40
   4  10  -1   -0.80    2.20
   4  10  -1    3.70    2.60
  -4 -10   1    3.00    2.40
   3  10  -1    3.30    2.50
   3  10  -1    2.60    2.10
  -3 -10   1    2.50    2.20
   2  10  -1    3.50    2.10
   2  10  -1    5.90    2.50
  -2 -10   1    6.00    2.40
  -2 -10   1    7.30    2.60
   1  10  -1    4.40    2.20
   1  10  -1   -2.60    1.60
  -1 -10   1    1.30    1.20
  -1 -10   1   -0.50    1.70
   0  10  -1   14.80    2.60
   0  10  -1   12.70    2.10
   0 -10   1   12.40    1.50
   0 -10   1   14.80    2.20
  -1  10  -1   48.10    3.50
  -1  10  -1   47.30    2.80
  -1  10  -1   50.59    3.20
  -1  10  -1   50.59    3.60
   1 -10   1   48.10    3.10
  -2  10  -1   -0.20    1.30
  -2  10  -1    2.60    1.70
  -2  10  -1    2.00    1.40
  -2  10  -1    4.20    1.90
   2 -10   1    0.80    1.00
   2 -10   1    2.90    1.40
  -3  10  -1   12.90    2.40
  -3  10  -1   17.30    2.50
  -3  10  -1   11.50    1.80
  -3  10  -1   14.90    2.20
   3 -10   1   14.40    1.60
   3 -10   1   13.60    2.00
  -4  10  -1    5.20    2.10
  -4  10  -1    5.00    1.50
  -4  10  -1   11.40    2.40
  -4  10  -1    7.80    1.60
   4 -10   1    5.80    1.10
  -5  10  -1    2.10    0.50
  -5  10  -1    1.60    1.10
  -5  10  -1    4.50    0.80
  -5  10  -1    2.80    1.80
  -5  10  -1    4.10    2.20
  -5  10  -1    3.10    1.30
   5 -10   1    4.80    1.00
  -6  10  -1   37.90    2.50
  -6  10  -1   40.40    3.40
  -6  10  -1   40.10    2.70
  -6  10  -1   37.10    3.30
  -6  10  -1   37.60    1.50
  -7  10  -1    5.70    2.10
  -7  10  -1    3.60    2.30
  -7  10  -1    5.50    0.90
  -7  10  -1    5.90    1.40
  -7  10  -1    3.60    1.30
  -8  10  -1   53.19    3.80
  -8  10  -1   49.60    2.20
  -8  10  -1   53.69    4.10
  -8  10  -1   55.19    2.90
  -8  10  -1   52.09    2.60
  -8  10  -1   44.70    2.80
  -9  10  -1    0.10    1.00
  -9  10  -1    2.90    2.00
  -9  10  -1    4.70    2.70
  -9  10  -1    1.30    1.20
  -9  10  -1    0.60    1.20
  -9  10  -1    1.10    1.00
 -10  10  -1   27.20    2.50
 -10  10  -1   25.70    2.50
 -10  10  -1   26.50    2.10
 -10  10  -1   25.30    1.90
 -10  10  -1   27.00    4.00
 -10  10  -1   26.60    2.20
 -11  10  -1    4.50    1.60
 -11  10  -1    3.60    1.50
 -11  10  -1    6.50    1.40
 -11  10  -1    7.40    3.40
 -11  10  -1    6.70    1.80
 -11  10  -1    3.60    1.10
 -12  10  -1   24.70    2.30
 -12  10  -1   27.50    2.60
 -12  10  -1   31.60    3.10
 -12  10  -1   28.70    4.00
 -13  10  -1    1.50    3.40
 -13  10  -1    5.90    2.00
 -13  10  -1    4.10    2.00
 -14  10  -1   23.00    5.00
 -14  10  -1   12.00    2.50
 -14  10  -1   17.00    2.70
 -15  10  -1   24.60    3.30
 -15  10  -1   28.80    5.50
 -15  10  -1   24.40    3.50
 -16  10  -1    6.00    2.70
 -16  10  -1    2.00    2.20
 -16  10  -1   12.20    4.40
 -17  10  -1    1.60    2.40
 -17  10  -1   11.50    4.80
 -17  10  -1    3.50    2.70
   9   9  -1   -3.20    3.60
  -9  -9   1   -2.50    3.10
   8   9  -1    3.00    3.20
  -8  -9   1   -0.10    2.70
   7   9  -1   14.60    3.40
  -7  -9   1   10.80    3.30
   6   9  -1   18.60    3.50
   6   9  -1   12.50    2.90
  -6  -9   1   19.10    2.80
  -6  -9   1   23.50    3.60
   5   9  -1   29.30    3.40
   5   9  -1   43.00    4.50
  -5  -9   1   37.10    3.60
  -5  -9   1   40.40    3.10
   4   9  -1  228.28    7.90
   4   9  -1  215.18    8.20
  -4  -9   1  215.88    7.80
  -4  -9   1  232.88    7.00
   3   9  -1   19.80    2.80
   3   9  -1   17.30    2.90
  -3  -9   1   20.40    2.90
  -3  -9   1   19.20    2.30
   2   9  -1   30.50    3.20
   2   9  -1   26.70    2.70
  -2  -9   1   28.50    2.30
  -2  -9   1   25.90    3.80
  -2  -9   1   29.90    2.90
   1   9  -1   16.90    3.40
   1   9  -1   13.30    2.10
   1   9  -1   12.20    2.40
  -1  -9   1   11.60    1.70
  -1  -9   1   14.00    2.30
  -1  -9   1   12.40    1.80
   0   9  -1   14.80    1.00
   0   9  -1   14.60    2.40
   0   9  -1   15.00    2.20
   0   9  -1   15.40    2.10
   0  -9   1   13.10    2.00
   0  -9   1   17.00    1.60
   0  -9   1   15.80    1.90
   0  -9   1   14.30    1.50
  -1   9  -1  106.69    4.10
  -1   9  -1  110.99    4.90
  -1   9  -1  107.29    2.90
  -1   9  -1  112.39    4.50
  -1   9  -1  111.89    4.40
   1  -9   1  104.99    3.70
   1  -9   1  118.89    4.50
  -2   9  -1   21.00    2.20
  -2   9  -1   17.90    2.20
  -2   9  -1   23.30    2.40
  -2   9  -1   16.70    2.40
   2  -9   1   25.10    1.80
   2  -9   1   22.10    2.30
   2  -9   1   16.80    1.70
  -3   9  -1  420.46   11.30
  -3   9  -1  406.76   11.80
  -3   9  -1  399.86   11.00
  -3   9  -1  407.76   11.40
   3  -9   1  421.56   10.50
  -4   9  -1    0.10    1.10
  -4   9  -1    0.00    0.40
  -4   9  -1    1.70    1.70
  -4   9  -1    0.40    0.60
  -4   9  -1    2.30    1.70
  -4   9  -1    0.10    1.10
   4  -9   1    0.40    0.80
  -5   9  -1   72.49    3.90
  -5   9  -1   70.29    3.30
  -5   9  -1   73.59    3.20
  -5   9  -1   69.19    2.10
  -5   9  -1   70.19    3.90
   5  -9   1   71.39    2.60
  -6   9  -1    5.20    1.20
  -6   9  -1    2.80    1.20
  -6   9  -1    1.40    1.90
  -6   9  -1    1.00    0.70
  -6   9  -1    2.30    1.80
  -7   9  -1   16.20    1.30
  -7   9  -1   20.50    2.00
  -7   9  -1   18.80    2.70
  -7   9  -1   18.30    2.90
  -7   9  -1   18.60    2.00
  -8   9  -1    4.80    2.20
  -8   9  -1    5.40    1.30
  -8   9  -1    6.20    2.10
  -8   9  -1    5.70    1.10
  -8   9  -1    5.40    1.30
  -8   9  -1    6.20    1.20
  -9   9  -1   75.29    3.40
  -9   9  -1   72.39    3.10
  -9   9  -1   74.79    2.90
  -9   9  -1   78.49    3.00
  -9   9  -1   75.99    4.70
  -9   9  -1   72.39    3.40
 -10   9  -1    3.70    1.20
 -10   9  -1    4.60    1.50
 -10   9  -1    3.90    1.10
 -10   9  -1    4.40    2.90
 -10   9  -1    5.40    1.40
 -10   9  -1    4.60    1.60
 -11   9  -1   60.79    2.60
 -11   9  -1   62.49    2.90
 -11   9  -1   64.39    3.20
 -11   9  -1   69.99    4.80
 -11   9  -1   64.69    3.60
 -12   9  -1   37.60    4.20
 -12   9  -1   35.30    3.10
 -12   9  -1   31.30    2.40
 -12   9  -1   36.10    2.10
 -12   9  -1   37.10    2.80
 -13   9  -1   10.70    2.30
 -13   9  -1    8.10    2.20
 -13   9  -1   19.30    4.40
 -14   9  -1    8.90    4.10
 -14   9  -1    1.90    2.20
 -14   9  -1    3.70    2.10
 -15   9  -1    6.00    3.90
 -15   9  -1   -1.50    2.00
 -15   9  -1   -2.20    1.90
 -16   9  -1    2.90    2.50
 -16   9  -1   12.10    4.70
 -16   9  -1    5.40    2.60
 -17   9  -1   -4.10    2.10
 -17   9  -1    7.40    4.30
 -17   9  -1    4.50    2.90
  10   8  -1   -3.80    3.60
 -10  -8   1    3.40    3.30
   9   8  -1    3.10    3.20
  -9  -8   1    6.80    2.90
  -9  -8   1   15.40    3.00
   8   8  -1   15.90    3.90
  -8  -8   1   14.10    3.00
  -8  -8   1   16.20    2.80
   7   8  -1   16.10    3.40
  -7  -8   1   31.70    3.50
  -7  -8   1   20.00    3.20
   6   8  -1   11.40    3.10
   6   8  -1    5.40    2.30
  -6  -8   1    2.40    2.40
  -6  -8   1    6.70    2.20
   5   8  -1    1.40    1.90
   5   8  -1    0.90    2.30
  -5  -8   1    1.60    2.10
  -5  -8   1    0.60    1.70
   4   8  -1    4.60    1.90
   4   8  -1    0.80    2.00
  -4  -8   1    6.60    1.70
  -4  -8   1    1.80    2.00
  -4  -8   1    4.30    1.70
   3   8  -1   34.30    3.50
   3   8  -1   38.00    2.90
  -3  -8   1   33.70    2.40
  -3  -8   1   37.20    2.80
  -3  -8   1   31.50    2.80
   2   8  -1   -0.90    1.90
   2   8  -1    0.20    1.40
   2   8  -1    2.80    1.30
  -2  -8   1    1.90    1.20
  -2  -8   1    3.20    1.30
  -2  -8   1    2.10    1.40
  -2  -8   1    2.30    1.60
   1   8  -1    3.10    1.30
   1   8  -1    2.00    1.50
   1   8  -1   -3.30    1.40
  -1  -8   1   -1.60    1.00
  -1  -8   1    2.10    1.20
  -1  -8   1   -0.60    1.20
  -1  -8   1    1.10    1.10
   0   8  -1    8.10    2.00
   0   8  -1    7.20    0.80
   0   8  -1    8.80    1.60
   0   8  -1    6.00    1.40
   0   8  -1    8.20    1.50
   0  -8   1    8.00    1.30
   0  -8   1    8.10    1.40
   0  -8   1    9.90    1.30
   0  -8   1    7.40    1.50
  -1   8  -1  115.69    4.90
  -1   8  -1  119.29    4.40
  -1   8  -1  116.59    3.00
  -1   8  -1  115.99    4.30
  -1   8  -1  117.79    4.20
   1  -8   1  119.59    3.80
   1  -8   1  107.29    4.30
   1  -8   1  111.39    3.30
  -2   8  -1  215.98    6.60
  -2   8  -1  212.98    5.10
  -2   8  -1  217.48    7.10
  -2   8  -1  208.88    6.50
  -2   8  -1  211.28    6.50
   2  -8   1  221.18    6.10
   2  -8   1  227.98    6.50
   2  -8   1  212.78    6.00
  -3   8  -1   90.79    3.50
  -3   8  -1   86.19    2.30
  -3   8  -1   84.29    3.80
  -3   8  -1   92.39    4.10
  -3   8  -1   86.29    2.20
  -3   8  -1   81.99    3.40
   3  -8   1   83.99    3.00
  -4   8  -1   11.40    2.20
  -4   8  -1   10.50    1.40
  -4   8  -1   13.30    2.20
  -4   8  -1   11.90    0.80
  -4   8  -1   13.10    1.80
   4  -8   1   11.50    1.40
  -5   8  -1   17.80    1.90
  -5   8  -1   17.20    2.50
  -5   8  -1   20.00    1.90
  -5   8  -1   20.90    1.10
  -5   8  -1   20.40    2.50
   5  -8   1   22.30    1.50
  -6   8  -1   18.50    2.40
  -6   8  -1   17.10    1.90
  -6   8  -1   16.00    2.50
  -6   8  -1   16.90    1.20
  -6   8  -1   16.50    1.80
  -7   8  -1    2.60    1.10
  -7   8  -1    2.20    1.10
  -7   8  -1    5.30    1.00
  -7   8  -1    5.30    2.20
  -7   8  -1    5.60    1.10
  -8   8  -1  211.58    6.00
  -8   8  -1  213.18    5.80
  -8   8  -1  209.78    6.30
  -8   8  -1  216.18    6.30
  -8   8  -1  209.28    5.80
  -8   8  -1  193.68    7.30
  -9   8  -1   34.70    2.50
  -9   8  -1   34.90    2.10
  -9   8  -1   29.20    3.50
  -9   8  -1   33.80    1.90
  -9   8  -1   34.20    2.10
 -10   8  -1    9.60    2.70
 -10   8  -1   10.50    1.50
 -10   8  -1   11.00    1.70
 -10   8  -1   11.60    1.80
 -10   8  -1   12.40    1.70
 -11   8  -1    3.60    1.60
 -11   8  -1    3.50    1.60
 -11   8  -1    6.30    1.40
 -11   8  -1    0.40    1.00
 -11   8  -1    6.50    2.70
 -11   8  -1    4.50    1.10
 -12   8  -1    1.40    1.30
 -12   8  -1   -0.40    1.60
 -12   8  -1    1.50    1.10
 -12   8  -1    5.20    3.20
 -12   8  -1    2.10    1.70
 -13   8  -1    0.60    1.80
 -13   8  -1    0.10    1.20
 -13   8  -1   -1.70    1.90
 -13   8  -1    3.30    3.50
 -14   8  -1  114.59    5.50
 -14   8  -1  115.29    5.10
 -14   8  -1  108.89    6.50
 -15   8  -1   -0.80    2.10
 -15   8  -1    1.10    3.90
 -15   8  -1    0.30    2.00
 -16   8  -1   -1.90    2.50
 -16   8  -1    0.30    3.60
 -16   8  -1    4.20    2.40
 -17   8  -1   -4.60    2.20
 -17   8  -1   10.30    4.50
 -17   8  -1   -0.70    2.70
  11   7  -1    1.20    3.80
  10   7  -1    1.60    3.70
 -10  -7   1    1.70    2.70
 -10  -7   1    7.00    2.90
   9   7  -1    7.40    3.20
  -9  -7   1    9.40    2.80
  -9  -7   1   23.50    3.40
   8   7  -1   -0.80    2.70
  -8  -7   1    1.30    2.20
  -8  -7   1   -0.40    2.10
   7   7  -1   11.80    2.60
   7   7  -1   11.40    3.00
  -7  -7   1   13.30    2.50
  -7  -7   1   16.40    2.70
   6   7  -1   15.70    2.50
   6   7  -1   12.00    2.70
  -6  -7   1   13.40    2.20
  -6  -7   1   13.40    2.50
  -6  -7   1   16.60    2.40
  -6  -7   1   15.60    2.20
   5   7  -1   41.70    3.50
   5   7  -1   44.10    3.50
  -5  -7   1   40.20    3.20
  -5  -7   1   51.19    2.90
  -5  -7   1   41.40    2.50
  -5  -7   1   42.10    3.00
   4   7  -1   21.70    2.50
   4   7  -1   22.50    2.90
  -4  -7   1   21.70    2.30
  -4  -7   1   24.30    2.10
  -4  -7   1   20.20    2.50
   3   7  -1    7.40    1.70
   3   7  -1    7.80    1.90
   3   7  -1    5.00    1.80
  -3  -7   1    7.00    1.70
  -3  -7   1    9.40    1.50
  -3  -7   1    6.70    1.70
  -3  -7   1    6.80    1.50
   2   7  -1    9.80    1.70
   2   7  -1    5.80    1.60
   2   7  -1   10.50    2.00
  -2  -7   1    8.40    1.60
  -2  -7   1    9.60    1.60
  -2  -7   1    9.40    1.60
  -2  -7   1   11.10    1.40
   1   7  -1   14.40    2.10
   1   7  -1   15.60    1.10
   1   7  -1   16.00    2.00
   1   7  -1   18.20    2.40
  -1  -7   1   19.10    2.00
  -1  -7   1   18.00    1.70
  -1  -7   1   18.00    1.50
  -1  -7   1   19.50    1.70
   0   7  -1   42.90    2.20
   0   7  -1   38.90    2.90
   0   7  -1   34.30    2.50
   0   7  -1   38.90    1.50
   0   7  -1   36.70    2.30
   0  -7   1   37.30    2.20
   0  -7   1   36.30    2.60
   0  -7   1   40.90    2.10
   0  -7   1   37.30    1.80
  -1   7  -1  195.08    5.70
  -1   7  -1  184.58    4.50
  -1   7  -1  189.58    6.20
  -1   7  -1  177.48    5.50
  -1   7  -1  186.38    5.60
   1  -7   1  183.18    5.60
   1  -7   1  181.28    5.20
   1  -7   1  170.08    4.80
  -2   7  -1   78.99    3.20
  -2   7  -1   84.59    3.50
  -2   7  -1   85.59    4.00
  -2   7  -1   79.79    3.20
  -2   7  -1   79.29    2.20
   2  -7   1   84.49    3.00
   2  -7   1   81.19    3.30
   2  -7   1   80.39    2.80
  -3   7  -1   60.19    3.00
  -3   7  -1   59.29    1.90
  -3   7  -1   58.29    2.70
  -3   7  -1   59.99    3.20
  -3   7  -1   57.39    1.70
  -3   7  -1   59.99    2.60
   3  -7   1   60.39    2.60
   3  -7   1   55.59    2.30
  -4   7  -1   93.29    4.10
  -4   7  -1   98.69    2.60
  -4   7  -1   98.39    3.50
  -4   7  -1   96.59    4.10
  -4   7  -1   98.59    3.50
   4  -7   1   95.79    3.10
  -5   7  -1   87.89    4.00
  -5   7  -1   90.99    2.60
  -5   7  -1   86.49    3.20
  -5   7  -1   88.39    3.00
  -5   7  -1   87.79    3.30
  -5   7  -1   92.19    4.00
   5  -7   1   86.89    2.90
  -6   7  -1   47.80    2.40
  -6   7  -1   48.40    1.90
  -6   7  -1   50.39    2.20
  -6   7  -1   48.80    3.20
  -6   7  -1   49.30    2.50
  -7   7  -1    3.40    1.00
  -7   7  -1    2.50    1.80
  -7   7  -1    1.90    0.90
  -7   7  -1    2.20    1.10
  -7   7  -1    4.00    1.00
  -7   7  -1    1.70    1.10
  -8   7  -1  150.48    4.50
  -8   7  -1  148.49    4.90
  -8   7  -1  142.29    5.90
  -8   7  -1  156.28    4.50
  -8   7  -1  148.99    4.40
  -9   7  -1   16.40    1.50
  -9   7  -1   16.80    1.60
  -9   7  -1   16.50    3.00
  -9   7  -1   18.30    2.10
  -9   7  -1   18.20    1.80
 -10   7  -1   23.30    3.40
 -10   7  -1   21.90    2.10
 -10   7  -1   18.80    1.70
 -10   7  -1   19.30    2.20
 -10   7  -1   17.10    1.30
 -10   7  -1   19.50    1.80
 -10   7  -1   20.00    1.50
 -11   7  -1    5.70    1.20
 -11   7  -1    5.30    1.70
 -11   7  -1    5.50    1.30
 -11   7  -1    2.90    1.50
 -11   7  -1    3.40    0.90
 -11   7  -1    8.50    2.60
 -12   7  -1   29.20    3.00
 -12   7  -1   29.40    3.70
 -12   7  -1   32.90    2.90
 -12   7  -1   26.10    2.10
 -13   7  -1    3.80    2.20
 -13   7  -1    2.60    1.40
 -13   7  -1    0.20    1.90
 -13   7  -1    2.30    3.20
 -14   7  -1    3.00    2.10
 -14   7  -1    5.70    1.70
 -14   7  -1    8.40    2.30
 -14   7  -1   11.60    3.70
 -15   7  -1    4.50    2.40
 -15   7  -1    2.60    3.60
 -15   7  -1    8.30    2.80
 -16   7  -1    9.10    4.10
 -16   7  -1    5.60    2.90
 -16   7  -1    2.90    2.50
 -17   7  -1   -1.40    2.50
 -17   7  -1   11.50    4.70
 -17   7  -1    5.60    2.70
  11   6  -1    3.20    3.30
 -11  -6   1   -0.10    2.80
 -11  -6   1    7.00    2.70
  10   6  -1   13.90    3.50
 -10  -6   1    8.80    2.80
 -10  -6   1   13.20    2.90
   9   6  -1   -3.30    2.70
  -9  -6   1   -1.10    2.10
  -9  -6   1    3.60    2.30
   8   6  -1   43.60    4.60
  -8  -6   1   45.60    3.90
  -8  -6   1   46.30    3.50
  -8  -6   1   53.79    4.20
  -8  -6   1   48.50    3.60
   7   6  -1   36.40    3.30
   7   6  -1   33.50    4.00
  -7  -6   1   40.30    3.20
  -7  -6   1   29.90    3.00
  -7  -6   1   35.10    3.20
  -7  -6   1   32.10    2.70
   6   6  -1   25.00    3.10
   6   6  -1   21.70    3.00
  -6  -6   1   20.10    2.50
  -6  -6   1   23.80    2.30
  -6  -6   1   24.80    2.50
  -6  -6   1   28.70    2.80
   5   6  -1   14.90    2.60
   5   6  -1   13.50    2.10
  -5  -6   1   13.80    1.90
  -5  -6   1   11.60    1.80
  -5  -6   1   10.80    2.00
   4   6  -1    2.10    1.40
   4   6  -1    1.50    1.60
  -4  -6   1    1.10    1.20
  -4  -6   1   -0.30    1.20
  -4  -6   1    1.20    1.40
   3   6  -1   24.50    2.20
   3   6  -1   20.50    2.10
   3   6  -1   15.90    2.30
  -3  -6   1   14.70    1.60
  -3  -6   1   16.50    2.00
  -3  -6   1   14.40    1.90
  -3  -6   1   16.00    2.00
   2   6  -1    9.90    1.50
   2   6  -1    7.60    1.70
   2   6  -1    7.40    1.50
  -2  -6   1   10.20    1.30
  -2  -6   1   11.40    1.70
  -2  -6   1    8.60    1.50
  -2  -6   1    8.10    1.30
   1   6  -1    2.40    1.40
   1   6  -1    2.10    1.10
   1   6  -1    3.00    1.30
   1   6  -1    2.80    0.70
  -1  -6   1    3.30    1.20
  -1  -6   1    3.20    1.20
  -1  -6   1    1.70    1.00
  -1  -6   1    2.10    0.90
   0   6  -1    3.70    0.60
   0   6  -1    4.30    1.50
   0   6  -1    2.10    1.00
   0   6  -1    4.00    1.20
   0   6  -1    2.20    1.10
   0  -6   1    3.80    0.90
   0  -6   1    2.10    1.10
   0  -6   1    2.80    1.00
   0  -6   1    4.90    1.10
  -1   6  -1   84.39    3.20
  -1   6  -1   82.79    3.10
  -1   6  -1   85.09    2.30
  -1   6  -1   78.49    3.50
  -1   6  -1   81.79    3.10
   1  -6   1   79.19    2.50
   1  -6   1   87.29    2.90
   1  -6   1   84.49    3.20
  -2   6  -1  192.08    6.00
  -2   6  -1  197.68    5.80
  -2   6  -1  189.68    5.50
  -2   6  -1  192.28    4.80
  -2   6  -1  192.58    5.50
   2  -6   1  190.28    5.20
   2  -6   1  206.88    5.60
   2  -6   1  195.78    5.40
  -3   6  -1   18.40    0.90
  -3   6  -1   18.20    1.30
  -3   6  -1   15.10    1.50
  -3   6  -1   15.60    1.50
  -3   6  -1   16.70    2.00
  -3   6  -1   13.50    1.80
   3  -6   1   16.30    1.40
   3  -6   1   16.70    1.20
  -4   6  -1  169.48    4.60
  -4   6  -1  162.68    4.80
  -4   6  -1  173.68    4.30
  -4   6  -1  168.48    5.50
  -4   6  -1  164.78    5.40
  -4   6  -1  164.38    4.80
   4  -6   1  168.58    4.50
  -5   6  -1  164.38    4.90
  -5   6  -1  166.88    4.80
  -5   6  -1  160.78    5.40
  -5   6  -1  168.18    4.40
   5  -6   1  173.18    4.60
   5  -6   1  176.08    4.70
  -6   6  -1  173.38    5.10
  -6   6  -1  163.78    5.70
  -6   6  -1  174.88    4.70
  -6   6  -1  177.78    4.90
  -6   6  -1  173.78    4.80
   6  -6   1  175.18    4.80
  -7   6  -1  182.28    5.10
  -7   6  -1  168.48    6.20
  -7   6  -1  185.18    5.10
  -7   6  -1  188.78    5.10
  -7   6  -1  188.58    5.40
  -8   6  -1  116.09    3.80
  -8   6  -1  118.59    3.70
  -8   6  -1  116.89    4.00
  -8   6  -1  115.09    3.20
  -8   6  -1  111.19    3.60
  -8   6  -1  110.89    4.80
  -9   6  -1   36.90    2.40
  -9   6  -1   36.80    3.10
  -9   6  -1   38.10    2.30
  -9   6  -1   39.90    1.70
  -9   6  -1   41.80    2.10
  -9   6  -1   34.50    1.50
  -9   6  -1   37.50    2.00
 -10   6  -1    2.40    0.60
 -10   6  -1    2.70    1.00
 -10   6  -1    1.90    1.10
 -10   6  -1    1.20    2.30
 -10   6  -1    3.40    1.50
 -10   6  -1    2.70    0.70
 -10   6  -1    1.40    1.30
 -11   6  -1    0.40    1.10
 -11   6  -1    1.80    1.00
 -11   6  -1   -2.00    1.30
 -11   6  -1    2.00    2.60
 -11   6  -1   -0.10    1.40
 -12   6  -1   33.30    3.80
 -12   6  -1   32.50    2.30
 -12   6  -1   33.60    3.10
 -12   6  -1   35.90    3.00
 -13   6  -1   65.79    3.70
 -13   6  -1   70.09    3.50
 -13   6  -1   68.59    5.10
 -13   6  -1   73.99    4.30
 -14   6  -1   73.79    5.40
 -14   6  -1   64.09    4.50
 -14   6  -1   61.49    4.20
 -14   6  -1   58.79    3.40
 -15   6  -1    7.40    2.60
 -15   6  -1    8.30    2.60
 -15   6  -1    2.40    2.30
 -15   6  -1   12.10    4.10
 -16   6  -1   11.30    4.70
 -16   6  -1    7.00    2.90
 -16   6  -1    8.80    3.10
 -17   6  -1    1.50    3.00
 -17   6  -1   -5.20    2.40
 -17   6  -1    5.90    4.00
  12   5  -1    1.00    3.40
 -12  -5   1    5.70    2.90
 -12  -5   1    5.60    2.90
  11   5  -1    8.70    3.30
 -11  -5   1    8.50    2.80
 -11  -5   1   12.10    3.10
  10   5  -1   -0.50    2.80
 -10  -5   1    1.40    2.50
 -10  -5   1    3.30    2.70
 -10  -5   1   -3.60    2.30
   9   5  -1    0.00    2.70
  -9  -5   1    1.20    2.30
  -9  -5   1   -1.00    2.20
  -9  -5   1    3.50    2.30
  -9  -5   1    1.10    2.40
   8   5  -1   13.90    2.50
   8   5  -1   15.80    3.20
  -8  -5   1   14.40    2.70
  -8  -5   1   16.90    2.60
  -8  -5   1   11.90    2.40
  -8  -5   1   14.30    2.50
   7   5  -1   18.40    2.80
   7   5  -1   20.60    2.90
  -7  -5   1   20.70    2.50
  -7  -5   1   16.70    2.50
  -7  -5   1   17.60    2.60
  -7  -5   1   21.50    2.60
   6   5  -1    8.90    2.10
   6   5  -1    5.90    1.80
  -6  -5   1    8.20    1.80
  -6  -5   1    6.30    1.70
  -6  -5   1   10.30    1.90
  -6  -5   1    7.80    1.80
   5   5  -1   16.60    2.40
   5   5  -1   12.30    2.00
  -5  -5   1   13.30    1.90
  -5  -5   1   15.40    1.70
  -5  -5   1   14.60    2.10
  -5  -5   1   11.70    1.70
   4   5  -1  247.58    7.60
   4   5  -1  243.28    7.30
  -4  -5   1  252.97    6.90
  -4  -5   1  234.28    7.20
  -4  -5   1  252.17    7.10
   3   5  -1  236.68    7.30
   3   5  -1  247.48    7.10
   3   5  -1  241.98    7.00
  -3  -5   1  230.58    6.40
  -3  -5   1  239.58    7.00
  -3  -5   1  236.18    6.90
  -3  -5   1  241.48    6.80
   2   5  -1   40.20    2.20
   2   5  -1   41.00    2.60
   2   5  -1   44.80    2.50
  -2  -5   1   40.30    2.30
  -2  -5   1   41.60    2.20
  -2  -5   1   41.10    2.10
  -2  -5   1   38.10    1.90
   1   5  -1  329.17    8.90
   1   5  -1  328.37    8.50
   1   5  -1  330.77    8.60
   1   5  -1  323.17    7.80
  -1  -5   1  314.77    8.30
  -1  -5   1  309.27    8.40
  -1  -5   1  317.87    8.00
  -1  -5   1  322.67    8.30
   0   5  -1   65.49    2.60
   0   5  -1   68.49    2.00
   0   5  -1   68.69    3.00
   0   5  -1   67.69    2.60
   0   5  -1   67.59    2.50
   0  -5   1   67.69    2.40
   0  -5   1   68.39    2.50
   0  -5   1   66.19    2.60
   0  -5   1   62.79    2.20
  -1   5  -1  966.70   23.60
  -1   5  -1  987.20   23.20
  -1   5  -1  988.40   23.20
  -1   5  -1  973.00   23.20
  -1   5  -1  984.00   22.50
   1  -5   1  973.80   23.00
   1  -5   1 1024.20   23.20
   1  -5   1  971.90   22.70
   1  -5   1  967.90   23.00
  -2   5  -1  506.85   12.60
  -2   5  -1  503.45   11.90
  -2   5  -1  508.05   12.40
  -2   5  -1  541.55   12.30
  -2   5  -1  486.55   12.80
  -2   5  -1  493.85   12.40
   2  -5   1  512.05   12.30
   2  -5   1  503.95   12.10
  -3   5  -1  869.51   19.80
  -3   5  -1  829.32   20.30
  -3   5  -1  799.02   20.40
  -3   5  -1  838.32   19.90
  -3   5  -1  855.01   19.40
  -3   5  -1  849.22   19.80
   3  -5   1  852.41   20.00
   3  -5   1  833.22   19.60
  -4   5  -1  402.46   10.50
  -4   5  -1  399.26    9.60
  -4   5  -1  406.36    9.90
  -4   5  -1  394.36    9.90
   4  -5   1  401.66    9.70
   4  -5   1  414.76    9.80
  -5   5  -1   65.29    2.20
  -5   5  -1   70.79    3.20
  -5   5  -1   68.49    2.50
  -5   5  -1   68.69    2.40
  -5   5  -1   70.19    2.40
   5  -5   1   72.99    2.70
   5  -5   1   71.89    2.30
  -6   5  -1    2.30    0.80
  -6   5  -1    2.00    0.80
  -6   5  -1    2.00    0.90
  -6   5  -1    1.10    1.40
  -6   5  -1    2.20    0.80
   6  -5   1    2.50    0.90
  -7   5  -1  157.18    5.60
  -7   5  -1  160.38    4.60
  -7   5  -1  163.18    4.70
  -7   5  -1  162.58    4.90
  -7   5  -1  160.38    4.60
   7  -5   1  168.78    4.80
   7  -5   1  155.38    5.10
  -8   5  -1   44.40    2.10
  -8   5  -1   44.10    2.40
  -8   5  -1   44.20    1.70
  -8   5  -1   42.60    2.00
  -8   5  -1   43.60    2.30
  -8   5  -1   43.50    3.00
   8  -5   1   42.30    2.30
  -9   5  -1   20.70    1.00
  -9   5  -1   23.90    1.80
  -9   5  -1   18.80    2.00
  -9   5  -1   22.00    2.60
  -9   5  -1   21.70    1.70
  -9   5  -1   22.80    2.10
  -9   5  -1   19.20    1.20
   9  -5   1   20.40    2.00
 -10   5  -1    6.20    1.50
 -10   5  -1    2.60    2.00
 -10   5  -1    5.50    1.20
 -10   5  -1    4.00    1.60
 -10   5  -1    4.60    1.20
  10  -5   1    4.10    1.30
 -11   5  -1   42.60    2.80
 -11   5  -1   39.30    3.90
 -11   5  -1   44.10    2.60
 -11   5  -1   41.30    2.50
 -11   5  -1   40.20    2.90
 -12   5  -1    1.40    1.90
 -12   5  -1   -0.50    1.30
 -12   5  -1   -0.90    1.70
 -12   5  -1   -0.80    2.70
 -13   5  -1   99.19    4.60
 -13   5  -1  101.79    4.20
 -13   5  -1  110.49    6.20
 -13   5  -1   99.69    5.10
 -14   5  -1    9.80    2.60
 -14   5  -1    8.10    2.80
 -14   5  -1   11.90    3.80
 -14   5  -1    8.00    2.00
 -15   5  -1   13.00    2.90
 -15   5  -1   16.30    2.50
 -15   5  -1   24.10    4.90
 -15   5  -1   17.90    3.10
 -16   5  -1    1.10    2.60
 -16   5  -1    1.30    2.60
 -16   5  -1    8.40    4.00
 -17   5  -1   11.60    4.60
 -17   5  -1    3.80    3.20
 -17   5  -1   -1.70    2.70
  13   4  -1   -0.10    3.10
 -13  -4   1    0.80    2.60
 -13  -4   1    2.20    2.90
  12   4  -1    3.60    3.10
 -12  -4   1   -1.50    2.60
 -12  -4   1    5.00    2.60
 -12  -4   1   -6.30    2.20
  11   4  -1    0.20    3.10
 -11  -4   1   -0.80    2.30
 -11  -4   1    2.30    2.70
 -11  -4   1    7.70    2.80
 -11  -4   1   -2.20    2.50
  10   4  -1    4.20    3.00
 -10  -4   1   -0.70    2.10
 -10  -4   1    1.50    2.40
 -10  -4   1    3.30    2.50
 -10  -4   1    3.30    2.40
   9   4  -1    1.30    2.40
  -9  -4   1    4.90    2.30
  -9  -4   1    2.40    2.20
  -9  -4   1    3.50    2.00
  -9  -4   1    0.20    2.00
   8   4  -1   10.50    2.80
   8   4  -1    8.90    2.00
  -8  -4   1    8.30    2.10
  -8  -4   1    8.60    2.20
  -8  -4   1    8.90    2.00
  -8  -4   1   15.50    2.60
   7   4  -1    7.50    2.20
   7   4  -1    6.20    1.70
  -7  -4   1    8.40    1.70
  -7  -4   1    7.80    1.80
  -7  -4   1    6.60    1.80
  -7  -4   1    6.10    1.70
   6   4  -1   11.00    1.90
   6   4  -1   11.80    2.10
  -6  -4   1   10.40    1.90
  -6  -4   1   14.90    2.10
  -6  -4   1   16.60    2.00
  -6  -4   1   11.90    1.90
   5   4  -1    1.90    1.30
   5   4  -1    2.30    1.50
  -5  -4   1    1.20    1.20
  -5  -4   1    1.40    1.20
  -5  -4   1    1.30    1.20
  -5  -4   1    2.70    1.30
   4   4  -1   -1.60    1.20
   4   4  -1    0.10    1.10
  -4  -4   1   -0.80    1.00
  -4  -4   1   -0.20    1.00
  -4  -4   1   -0.60    1.00
   3   4  -1  531.25   13.20
   3   4  -1  535.95   13.30
   3   4  -1  518.85   13.50
  -3  -4   1  525.55   12.90
  -3  -4   1  530.35   13.10
  -3  -4   1  527.95   13.30
   2   4  -1  183.98    4.80
   2   4  -1  180.88    5.30
   2   4  -1  182.18    5.60
   2   4  -1  174.98    5.20
  -2  -4   1  177.38    5.20
  -2  -4   1  190.88    4.90
  -2  -4   1  185.38    5.20
  -2  -4   1  179.28    5.10
   1   4  -1  209.48    6.10
   1   4  -1  220.18    5.80
   1   4  -1  215.08    5.80
   1   4  -1  218.88    5.30
  -1  -4   1  211.58    5.80
  -1  -4   1  213.98    5.50
  -1  -4   1  208.28    5.70
  -1  -4   1  210.88    5.60
   0   4  -1  791.52   17.50
   0   4  -1  741.63   17.80
   0   4  -1  754.52   18.00
   0   4  -1  750.32   18.40
   0   4  -1  741.33   18.00
   0   4  -1  789.72   18.10
   0  -4   1  764.12   18.00
   0  -4   1  726.43   17.80
   0  -4   1  744.53   17.60
   0  -4   1  785.92   18.60
  -1   4  -1 1262.47   28.10
  -1   4  -1 1207.98   28.60
  -1   4  -1 1209.18   28.90
  -1   4  -1 1208.48   28.50
  -1   4  -1 1232.38   28.40
  -1   4  -1 1262.17   28.50
  -1   4  -1 1209.58   28.60
   1  -4   1 1287.67   28.80
   1  -4   1 1223.18   28.60
   1  -4   1 1217.18   28.60
   1  -4   1 1234.38   28.30
   1  -4   1 1186.28   28.90
  -2   4  -1    8.00    1.40
  -2   4  -1    8.30    1.20
  -2   4  -1   11.80    1.10
  -2   4  -1    8.30    1.10
  -2   4  -1   14.50    1.80
   2  -4   1    8.80    1.00
   2  -4   1   11.20    1.50
   2  -4   1    9.00    1.20
   2  -4   1    6.90    1.10
  -3   4  -1   59.99    2.60
  -3   4  -1   61.29    1.80
  -3   4  -1   57.79    2.10
  -3   4  -1   58.99    2.10
  -3   4  -1   57.29    2.50
   3  -4   1   57.69    1.90
   3  -4   1   61.19    2.00
   3  -4   1   58.09    2.30
  -4   4  -1  124.29    3.50
  -4   4  -1  129.29    3.50
  -4   4  -1  118.39    3.40
  -4   4  -1  121.89    3.50
  -4   4  -1  130.69    4.10
   4  -4   1  123.19    3.50
   4  -4   1  126.09    3.40
  -5   4  -1    7.60    1.10
  -5   4  -1    7.50    0.90
  -5   4  -1    8.40    1.00
  -5   4  -1    9.50    1.60
  -5   4  -1    6.60    0.90
   5  -4   1    6.50    1.00
   5  -4   1    7.80    1.10
  -6   4  -1    6.60    1.10
  -6   4  -1    5.30    0.90
  -6   4  -1    5.50    1.70
  -6   4  -1    3.80    0.90
  -6   4  -1    4.00    0.80
  -6   4  -1    3.80    0.60
   6  -4   1    5.00    1.00
   6  -4   1    3.40    0.90
  -7   4  -1  214.88    5.90
  -7   4  -1  206.08    6.70
  -7   4  -1  206.38    5.30
  -7   4  -1  216.08    5.80
  -7   4  -1  215.18    6.00
  -7   4  -1  214.78    5.70
   7  -4   1  212.68    6.00
  -8   4  -1    1.80    0.90
  -8   4  -1    1.30    1.00
  -8   4  -1    3.10    1.80
  -8   4  -1    1.20    1.20
  -8   4  -1    2.20    0.50
  -8   4  -1    1.40    0.90
   8  -4   1    2.20    1.00
  -9   4  -1   73.59    3.00
  -9   4  -1   77.09    3.90
  -9   4  -1   72.09    3.30
  -9   4  -1   80.09    3.00
  -9   4  -1   73.09    3.10
   9  -4   1   78.49    3.20
 -10   4  -1   26.40    2.40
 -10   4  -1   25.50    3.20
 -10   4  -1   30.10    2.20
 -10   4  -1   29.30    2.20
 -10   4  -1   28.80    2.50
  10  -4   1   30.80    2.40
 -11   4  -1   23.50    3.10
 -11   4  -1   21.80    2.40
 -11   4  -1   21.90    2.30
 -11   4  -1   24.30    2.60
 -11   4  -1   23.00    2.20
 -12   4  -1   45.00    3.10
 -12   4  -1   46.40    2.90
 -12   4  -1   47.30    3.60
 -12   4  -1   45.30    4.00
 -13   4  -1    1.20    2.00
 -13   4  -1    4.80    1.80
 -13   4  -1    3.70    2.10
 -13   4  -1    1.40    3.20
 -14   4  -1   -0.60    1.80
 -14   4  -1    3.00    2.30
 -14   4  -1    6.20    2.70
 -14   4  -1    6.00    3.40
 -15   4  -1    0.70    2.40
 -15   4  -1    1.20    2.00
 -15   4  -1   -2.00    2.40
 -15   4  -1    2.40    3.40
 -16   4  -1    4.30    2.20
 -16   4  -1    3.30    2.90
 -16   4  -1    8.10    4.40
 -16   4  -1   -2.80    2.60
  13   3  -1    0.70    3.40
 -13  -3   1    2.20    2.80
 -13  -3   1    5.50    2.70
 -13  -3   1   -5.90    2.60
  12   3  -1    2.70    3.30
 -12  -3   1   -0.10    2.20
 -12  -3   1    2.00    2.90
 -12  -3   1    0.40    2.60
 -12  -3   1   -0.20    2.60
  11   3  -1   14.00    3.20
 -11  -3   1   24.70    3.50
 -11  -3   1   17.90    3.10
 -11  -3   1   26.30    3.20
 -11  -3   1   24.90    3.50
  10   3  -1    8.00    2.80
 -10  -3   1   12.10    2.70
 -10  -3   1   14.10    2.40
 -10  -3   1   11.50    2.90
 -10  -3   1   14.90    2.60
   9   3  -1   19.90    3.00
  -9  -3   1   29.40    3.10
  -9  -3   1   19.30    2.80
  -9  -3   1   24.60    2.70
  -9  -3   1   27.30    3.00
   8   3  -1    1.60    1.90
   8   3  -1   -0.20    1.40
  -8  -3   1    0.80    1.60
  -8  -3   1   -0.30    1.70
  -8  -3   1    0.20    1.60
  -8  -3   1   -1.40    1.60
   7   3  -1    8.70    1.70
   7   3  -1    9.50    2.10
  -7  -3   1   14.20    2.10
  -7  -3   1   11.40    2.00
  -7  -3   1   11.50    1.90
  -7  -3   1    8.30    1.70
   6   3  -1   14.20    1.90
   6   3  -1   17.40    2.30
  -6  -3   1   12.10    1.70
  -6  -3   1   11.80    1.60
  -6  -3   1   12.10    1.90
  -6  -3   1   12.10    1.80
   5   3  -1   32.90    2.50
   5   3  -1   30.20    2.40
  -5  -3   1   30.20    2.20
  -5  -3   1   32.00    2.20
  -5  -3   1   36.20    2.10
  -5  -3   1   36.60    2.00
   4   3  -1   43.80    2.30
   4   3  -1   43.50    2.70
  -4  -3   1   47.50    2.60
  -4  -3   1   43.70    2.20
  -4  -3   1   43.70    2.30
  -4  -3   1   46.90    2.40
   3   3  -1  235.28    6.30
   3   3  -1  230.98    6.60
   3   3  -1  237.28    6.40
  -3  -3   1  228.58    6.30
  -3  -3   1  228.68    6.20
  -3  -3   1  228.28    6.10
  -3  -3   1  228.78    6.40
   2   3  -1    1.40    1.00
   2   3  -1    0.20    0.70
   2   3  -1    1.90    0.60
   2   3  -1    0.00    0.60
   2   3  -1    1.10    0.80
  -2  -3   1    1.60    0.80
  -2  -3   1    0.40    0.90
  -2  -3   1    2.20    0.70
  -2  -3   1    0.30    0.60
   1   3  -1  110.39    3.30
   1   3  -1  116.09    3.20
   1   3  -1  114.39    3.00
   1   3  -1  112.89    3.30
   1   3  -1  118.49    3.50
   1   3  -1  111.09    3.60
  -1  -3   1  113.59    3.20
  -1  -3   1  116.59    3.30
  -1  -3   1  110.69    3.10
  -1  -3   1  108.19    3.30
  -1  -3   1  112.59    3.60
  -1  -3   1  108.19    3.50
   0   3  -1  344.27    8.30
   0   3  -1  336.27    8.40
   0   3  -1  348.97    8.10
   0   3  -1  334.37    8.20
   0   3  -1  342.97    8.40
   0   3  -1  348.97    8.40
   0   3  -1  335.47    8.70
   0  -3   1  346.67    8.50
   0  -3   1  337.77    8.20
   0  -3   1  358.16    8.50
   0  -3   1  339.47    8.70
   0  -3   1  338.37    8.20
  -1   3  -1  201.18    5.00
  -1   3  -1  203.98    5.00
  -1   3  -1  194.88    4.80
  -1   3  -1  197.08    5.10
  -1   3  -1  191.38    5.00
  -1   3  -1  195.88    5.40
   1  -3   1  208.08    5.10
   1  -3   1  195.48    5.10
   1  -3   1  190.78    4.80
   1  -3   1  198.88    4.90
   1  -3   1  198.48    5.40
  -2   3  -1   39.90    1.40
  -2   3  -1   39.00    1.50
  -2   3  -1   37.10    1.80
  -2   3  -1   41.60    2.00
  -2   3  -1   40.30    1.30
   2  -3   1   38.90    1.60
   2  -3   1   40.10    1.50
   2  -3   1   37.80    1.50
   2  -3   1   36.80    1.30
  -3   3  -1 1423.36   33.10
  -3   3  -1 1423.06   32.80
  -3   3  -1 1393.76   33.80
  -3   3  -1 1503.05   33.00
  -3   3  -1 1444.16   33.60
   3  -3   1 1375.46   32.70
   3  -3   1 1470.45   34.30
   3  -3   1 1416.36   32.60
   3  -3   1 1410.36   32.80
  -4   3  -1  285.27    7.80
  -4   3  -1  283.87    7.20
  -4   3  -1  293.17    7.30
  -4   3  -1  297.57    7.30
  -4   3  -1  300.47    7.20
   4  -3   1  289.77    7.30
   4  -3   1  303.17    7.30
   4  -3   1  294.67    8.00
   4  -3   1  303.47    7.40
  -5   3  -1    6.40    0.90
  -5   3  -1    4.20    0.70
  -5   3  -1    3.70    0.80
  -5   3  -1    4.70    1.20
  -5   3  -1    5.70    0.80
  -5   3  -1    3.90    0.50
   5  -3   1    6.50    1.00
   5  -3   1    5.50    0.80
  -6   3  -1   25.40    1.50
  -6   3  -1   23.90    1.40
  -6   3  -1   24.00    2.10
  -6   3  -1   24.50    1.60
  -6   3  -1   23.80    1.00
  -6   3  -1   25.00    1.60
   6  -3   1   24.50    1.60
  -7   3  -1  297.17    8.80
  -7   3  -1  307.07    7.90
  -7   3  -1  307.17    8.00
  -7   3  -1  322.47    8.00
  -7   3  -1  307.47    8.10
  -7   3  -1  296.07    7.20
   7  -3   1  307.17    8.10
  -8   3  -1   93.79    3.40
  -8   3  -1   93.19    3.50
  -8   3  -1   92.69    3.50
  -8   3  -1   93.69    3.40
  -8   3  -1   96.59    4.30
   8  -3   1   98.79    3.60
  -9   3  -1   53.99    2.60
  -9   3  -1   52.79    2.60
  -9   3  -1   50.69    2.70
  -9   3  -1   50.39    2.60
  -9   3  -1   50.99    3.50
   9  -3   1   51.09    2.80
 -10   3  -1    7.80    1.60
 -10   3  -1    6.00    2.10
 -10   3  -1    5.00    1.50
 -10   3  -1    5.80    1.40
 -10   3  -1    5.30    1.40
  10  -3   1    4.90    1.40
 -11   3  -1    0.40    1.70
 -11   3  -1    3.10    1.70
 -11   3  -1   -0.90    2.40
 -11   3  -1    0.00    1.30
 -12   3  -1   18.10    2.60
 -12   3  -1   16.90    3.20
 -12   3  -1   16.40    2.60
 -12   3  -1   16.90    2.20
 -13   3  -1   28.10    3.80
 -13   3  -1   32.10    3.60
 -13   3  -1   24.60    3.00
 -13   3  -1   23.70    3.40
 -14   3  -1   -0.50    2.30
 -14   3  -1    1.40    3.50
 -14   3  -1    0.40    2.30
 -14   3  -1   -0.90    1.90
 -15   3  -1    2.80    3.80
 -15   3  -1    0.80    2.60
 -15   3  -1   -0.80    2.00
 -15   3  -1    3.00    2.80
 -16   3  -1    7.00    2.90
 -16   3  -1    0.80    2.30
 -16   3  -1   -0.80    2.70
 -16   3  -1    7.60    4.00
  14   2  -1    1.90    3.70
 -14  -2   1    6.00    3.40
 -14  -2   1    5.40    3.20
 -14  -2   1    4.60    2.60
 -14  -2   1   -2.60    2.80
  13   2  -1   14.40    3.90
 -13  -2   1   17.80    3.90
 -13  -2   1   12.70    2.80
 -13  -2   1   17.50    3.50
 -13  -2   1    8.00    3.10
  12   2  -1   54.19    5.10
 -12  -2   1   51.59    4.30
 -12  -2   1   45.30    4.00
 -12  -2   1   56.79    4.00
 -12  -2   1   61.49    4.90
  11   2  -1   53.99    4.40
 -11  -2   1   46.90    4.10
 -11  -2   1   50.89    3.70
 -11  -2   1   55.39    4.00
 -11  -2   1   54.09    4.20
  10   2  -1    1.90    2.60
 -10  -2   1    2.50    1.80
 -10  -2   1    2.20    2.00
 -10  -2   1    5.30    2.30
 -10  -2   1    1.90    2.30
   9   2  -1   -2.00    1.50
   9   2  -1   -2.50    2.10
  -9  -2   1    1.40    1.60
  -9  -2   1    0.20    1.80
  -9  -2   1    0.90    1.60
  -9  -2   1    2.60    1.60
   8   2  -1    8.90    1.80
   8   2  -1   11.20    2.30
  -8  -2   1   16.70    2.30
  -8  -2   1    8.80    1.70
  -8  -2   1   10.10    1.70
  -8  -2   1   12.00    2.20
  -8  -2   1    9.60    1.90
   7   2  -1    8.90    1.90
   7   2  -1    6.70    1.50
  -7  -2   1    9.00    1.70
  -7  -2   1    9.30    1.60
  -7  -2   1   10.40    2.00
  -7  -2   1    8.40    1.50
  -7  -2   1   12.20    1.80
   6   2  -1   16.00    2.20
   6   2  -1   16.20    1.80
  -6  -2   1   17.50    1.90
  -6  -2   1   19.60    2.00
  -6  -2   1   15.00    1.80
  -6  -2   1   16.40    2.00
  -6  -2   1   20.40    2.00
   5   2  -1   73.49    3.30
   5   2  -1   68.49    2.90
   5   2  -1   69.19    2.50
  -5  -2   1   70.29    2.90
  -5  -2   1   70.59    2.90
  -5  -2   1   69.49    2.70
  -5  -2   1   71.09    3.00
  -5  -2   1   76.89    3.00
   4   2  -1  136.69    3.60
   4   2  -1  124.59    4.20
   4   2  -1  128.99    4.30
   4   2  -1  121.49    3.90
  -4  -2   1  119.79    4.00
  -4  -2   1  121.09    3.80
  -4  -2   1  120.09    3.80
  -4  -2   1  117.79    3.80
  -4  -2   1  123.29    3.80
   3   2  -1  356.36    9.10
   3   2  -1  350.86    8.50
   3   2  -1  352.96    8.80
   3   2  -1  354.06    8.90
  -3  -2   1  352.26    8.90
  -3  -2   1  347.47    8.90
  -3  -2   1  341.67    8.70
  -3  -2   1  357.46    8.80
   2   2  -1 4135.89   95.49
   2   2  -1 4106.69   95.79
   2   2  -1 4265.77   95.89
   2   2  -1 4216.08   96.19
   2   2  -1 4462.35   95.79
   2   2  -1 4161.18   95.79
  -2  -2   1 4127.69   95.89
  -2  -2   1 4180.88   96.19
  -2  -2   1 3884.01   95.39
  -2  -2   1 3627.74   96.59
  -2  -2   1 4282.47   96.29
   1   2  -1  178.18    4.60
   1   2  -1  179.58    4.50
   1   2  -1  175.18    4.40
   1   2  -1  177.58    4.40
   1   2  -1  177.58    4.80
   1   2  -1  171.18    4.60
  -1  -2   1  177.98    4.60
  -1  -2   1  175.98    4.60
  -1  -2   1  176.08    4.40
  -1  -2   1  174.68    4.70
  -1  -2   1  176.68    4.50
   0   2  -1  232.88    5.90
   0   2  -1  243.48    5.70
   0   2  -1  238.38    5.80
   0   2  -1  239.88    6.00
   0   2  -1  249.68    5.80
   0  -2   1  235.38    5.90
   0  -2   1  244.78    5.70
   0  -2   1  251.47    6.10
   0  -2   1  231.08    5.90
  -1   2  -1    6.40    0.50
  -1   2  -1    7.80    0.80
  -1   2  -1    5.70    0.50
  -1   2  -1    6.30    0.40
   1  -2   1    6.00    0.40
   1  -2   1    7.60    0.50
   1  -2   1    6.90    0.80
   1  -2   1    6.20    0.50
  -2   2  -1   18.10    0.90
  -2   2  -1   17.60    0.70
  -2   2  -1   18.20    1.00
  -2   2  -1   18.60    0.80
  -2   2  -1   19.10    0.70
   2  -2   1   18.30    0.90
   2  -2   1   17.90    1.00
   2  -2   1   17.70    0.70
   2  -2   1   17.90    0.60
  -3   2  -1   24.40    1.20
  -3   2  -1   26.10    1.10
  -3   2  -1   26.00    1.00
  -3   2  -1   25.60    1.10
  -3   2  -1   25.10    1.70
  -3   2  -1   26.00    1.20
   3  -2   1   27.20    1.20
   3  -2   1   25.70    1.30
   3  -2   1   23.60    1.30
   3  -2   1   27.40    1.40
   3  -2   1   27.00    1.00
  -4   2  -1   35.80    1.80
  -4   2  -1   36.00    1.60
  -4   2  -1   33.10    1.40
  -4   2  -1   36.60    1.50
  -4   2  -1   33.00    1.50
  -4   2  -1   31.00    2.00
  -4   2  -1   34.20    1.20
   4  -2   1   36.40    1.70
   4  -2   1   34.50    1.30
   4  -2   1   32.40    1.60
   4  -2   1   37.80    1.50
  -5   2  -1   81.99    2.60
  -5   2  -1   77.49    2.50
  -5   2  -1   78.49    2.10
  -5   2  -1   80.39    2.50
  -5   2  -1   77.59    2.60
  -5   2  -1   72.39    2.90
   5  -2   1   79.09    2.60
   5  -2   1   81.59    2.70
  -6   2  -1  390.76    9.80
  -6   2  -1  396.16    9.10
  -6   2  -1  376.96   10.30
  -6   2  -1  402.16    9.80
  -6   2  -1  392.86    9.80
  -6   2  -1  398.06    9.80
   6  -2   1  383.86    9.10
   6  -2   1  385.56    9.80
   6  -2   1  385.96   10.30
  -7   2  -1   23.50    2.30
  -7   2  -1   19.70    1.70
  -7   2  -1   22.10    1.90
  -7   2  -1   20.10    1.80
  -7   2  -1   24.50    1.80
  -7   2  -1   22.50    0.90
   7  -2   1   22.40    1.80
   7  -2   1   19.80    0.90
   7  -2   1   20.40    2.20
  -8   2  -1    1.30    1.50
  -8   2  -1   -1.40    1.00
  -8   2  -1    0.20    1.00
  -8   2  -1    0.60    1.20
  -8   2  -1    0.10    1.00
   8  -2   1    3.10    1.60
   8  -2   1   -0.20    1.00
   8  -2   1    0.70    0.40
  -9   2  -1  204.68    6.50
  -9   2  -1  224.88    7.30
  -9   2  -1  220.38    6.50
  -9   2  -1  206.98    6.40
  -9   2  -1  212.08    6.40
   9  -2   1  223.68    7.30
   9  -2   1  213.38    6.50
 -10   2  -1    3.30    1.60
 -10   2  -1    1.20    1.30
 -10   2  -1    2.00    1.50
 -10   2  -1    0.50    1.20
 -10   2  -1    2.00    2.30
  10  -2   1    1.00    1.80
  10  -2   1   -0.10    1.40
 -11   2  -1   -0.30    1.60
 -11   2  -1   -1.70    1.70
 -11   2  -1    0.10    2.40
 -11   2  -1    3.50    1.70
  11  -2   1    0.50    2.40
 -12   2  -1    0.50    1.90
 -12   2  -1    4.70    3.10
 -12   2  -1    3.20    2.00
 -12   2  -1    3.30    1.90
  12  -2   1    4.10    3.00
 -13   2  -1    5.40    2.60
 -13   2  -1    2.50    2.00
 -13   2  -1    5.40    3.40
 -13   2  -1    2.00    2.30
  13  -2   1    5.50    2.80
 -14   2  -1    1.30    2.50
 -14   2  -1    8.50    3.70
 -14   2  -1   -5.70    2.20
 -14   2  -1   -0.10    2.10
  14  -2   1    4.80    3.10
 -15   2  -1    7.80    2.90
 -15   2  -1   12.60    3.80
 -15   2  -1    4.60    2.90
 -15   2  -1    6.80    2.50
 -16   2  -1    6.00    3.30
 -16   2  -1   -1.10    3.00
 -16   2  -1    8.10    4.20
 -16   2  -1    2.80    2.50
  15   1  -1    5.60    3.60
 -15  -1   1   -9.20    2.80
 -15  -1   1    5.40    3.80
 -15  -1   1    5.40    3.00
 -15  -1   1    7.00    3.00
  14   1  -1    2.00    3.50
 -14  -1   1   -3.10    2.40
 -14  -1   1    1.70    2.60
 -14  -1   1    7.80    3.80
 -14  -1   1   -5.00    2.50
  13   1  -1   18.00    3.70
 -13  -1   1   19.00    3.20
 -13  -1   1   16.90    3.10
 -13  -1   1   17.10    3.00
 -13  -1   1   24.70    4.10
  12   1  -1   11.90    3.40
 -12  -1   1    6.20    2.60
 -12  -1   1    7.20    2.40
 -12  -1   1    6.40    2.40
 -12  -1   1   12.10    3.30
  11   1  -1   75.99    4.80
 -11  -1   1   85.99    4.50
 -11  -1   1   80.29    4.40
 -11  -1   1   81.09    4.90
 -11  -1   1   81.29    4.70
  10   1  -1   28.30    3.30
 -10  -1   1   18.00    2.50
 -10  -1   1   24.90    2.50
 -10  -1   1   20.40    3.10
 -10  -1   1   24.00    3.10
   9   1  -1   29.90    3.30
   9   1  -1   25.50    2.60
  -9  -1   1   26.50    2.80
  -9  -1   1   24.80    2.50
  -9  -1   1   29.20    2.40
  -9  -1   1   24.50    2.30
   8   1  -1   94.29    4.50
   8   1  -1   90.69    3.00
   8   1  -1   92.69    4.00
  -8  -1   1   94.99    3.70
  -8  -1   1   91.19    3.90
  -8  -1   1   99.49    4.10
  -8  -1   1   94.09    4.20
  -8  -1   1   92.59    3.90
   7   1  -1   69.99    3.20
   7   1  -1   78.39    2.50
   7   1  -1   82.39    3.80
  -7  -1   1   71.89    3.30
  -7  -1   1   77.19    3.30
  -7  -1   1   78.69    3.30
  -7  -1   1   72.59    3.20
  -7  -1   1   73.69    3.40
   6   1  -1    8.20    1.10
   6   1  -1    8.90    1.60
   6   1  -1   10.00    1.40
  -6  -1   1    9.40    1.50
  -6  -1   1    9.90    1.40
  -6  -1   1    9.20    1.80
  -6  -1   1    7.80    1.30
  -6  -1   1    6.90    1.40
   5   1  -1   90.09    3.40
   5   1  -1   93.09    3.60
   5   1  -1   97.59    2.70
  -5  -1   1   90.49    3.40
  -5  -1   1   91.99    3.20
  -5  -1   1   93.09    3.20
  -5  -1   1   90.39    3.40
  -5  -1   1   94.09    3.30
   4   1  -1   86.69    3.20
   4   1  -1   88.19    3.00
   4   1  -1   88.29    2.80
   4   1  -1   89.89    2.50
  -4  -1   1   84.09    2.80
  -4  -1   1   87.59    2.90
  -4  -1   1   89.09    3.00
  -4  -1   1   85.89    2.90
  -4  -1   1   80.99    2.80
   3   1  -1  699.93   16.70
   3   1  -1  722.93   16.40
   3   1  -1  729.53   16.70
   3   1  -1  709.03   17.00
   3   1  -1  715.53   16.80
   3   1  -1  714.43   16.60
  -3  -1   1  665.73   16.70
  -3  -1   1  711.43   16.60
  -3  -1   1  697.63   16.70
  -3  -1   1  707.03   16.80
  -3  -1   1  709.03   16.90
  -3  -1   1  705.53   16.70
   2   1  -1  765.22   18.40
   2   1  -1  790.12   18.60
   2   1  -1  771.12   18.10
   2   1  -1  803.12   18.30
   2   1  -1  804.12   18.50
   2   1  -1  795.12   18.40
  -2  -1   1  793.82   18.40
  -2  -1   1  809.32   18.40
  -2  -1   1  768.72   18.30
  -2  -1   1  795.22   18.50
  -2  -1   1  773.92   18.30
  -2  -1   1  808.02   18.50
   1   1  -1  237.48    6.00
   1   1  -1  246.98    5.90
   1   1  -1  249.48    5.90
   1   1  -1  245.68    5.80
   1   1  -1  256.17    5.90
  -1  -1   1  243.78    5.90
  -1  -1   1  243.08    5.90
  -1  -1   1  234.38    5.80
  -1  -1   1  249.18    5.90
  -1  -1   1  244.38    6.00
  -1  -1   1  252.67    5.90
   0   1  -1  165.18    3.90
   0   1  -1  158.18    3.80
   0   1  -1  154.78    3.80
   0  -1   1  163.88    3.90
   0  -1   1  159.18    3.80
  -1   1  -1  415.36    9.50
  -1   1  -1  406.26    9.50
   1  -1   1  408.76    9.50
  -2   1  -1  365.96    8.80
  -2   1  -1  365.16    8.60
  -2   1  -1  372.86    8.50
  -2   1  -1  372.76    8.70
  -2   1  -1  368.76    8.60
  -2   1  -1  362.66    8.70
   2  -1   1  361.96    8.50
   2  -1   1  369.66    8.60
   2  -1   1  375.36    8.50
   2  -1   1  378.26    8.70
   2  -1   1  363.66    8.70
  -3   1  -1   26.00    1.00
  -3   1  -1   25.50    1.50
  -3   1  -1   27.70    1.30
  -3   1  -1   22.40    1.40
  -3   1  -1   23.10    1.20
  -3   1  -1   24.70    1.30
  -3   1  -1   24.90    1.10
   3  -1   1   23.00    1.10
   3  -1   1   24.10    1.30
   3  -1   1   26.70    1.00
   3  -1   1   28.50    1.60
   3  -1   1   25.20    1.20
   3  -1   1   26.90    1.30
  -4   1  -1  514.75   12.30
  -4   1  -1  513.25   12.50
  -4   1  -1  507.15   12.20
  -4   1  -1  504.25   12.60
  -4   1  -1  529.15   11.90
  -4   1  -1  509.05   12.30
  -4   1  -1  508.15   12.30
   4  -1   1  515.35   12.80
   4  -1   1  493.75   12.30
   4  -1   1  516.15   11.90
   4  -1   1  522.55   12.60
  -5   1  -1   46.40    1.40
  -5   1  -1   42.50    2.10
  -5   1  -1   44.50    2.00
  -5   1  -1   46.00    1.90
  -5   1  -1   47.70    1.90
  -5   1  -1   45.80    2.00
   5  -1   1   50.59    2.40
   5  -1   1   46.00    1.50
  -6   1  -1  235.28    6.40
  -6   1  -1  238.78    6.40
  -6   1  -1  233.88    6.40
  -6   1  -1  238.98    6.90
  -6   1  -1  234.98    5.70
  -6   1  -1  238.88    6.40
   6  -1   1  223.18    6.80
   6  -1   1  234.18    5.80
  -7   1  -1   15.10    1.70
  -7   1  -1   10.40    1.40
  -7   1  -1   13.00    0.90
  -7   1  -1   12.90    1.60
  -7   1  -1   14.00    1.70
  -7   1  -1   11.10    2.10
   7  -1   1   12.50    1.00
   7  -1   1   11.70    1.90
  -8   1  -1  144.89    4.80
  -8   1  -1  138.89    3.60
  -8   1  -1  144.89    4.80
  -8   1  -1  137.99    4.60
  -8   1  -1  138.39    4.60
  -8   1  -1  143.79    5.20
   8  -1   1  141.09    3.80
   8  -1   1  147.09    5.30
  -9   1  -1    5.60    1.50
  -9   1  -1    5.10    1.40
  -9   1  -1    7.20    2.00
  -9   1  -1    3.70    1.40
  -9   1  -1    4.30    1.60
   9  -1   1    5.80    2.00
   9  -1   1    5.70    0.70
 -10   1  -1   15.40    2.10
 -10   1  -1   16.80    2.40
 -10   1  -1   11.80    1.90
 -10   1  -1   15.00    2.90
  10  -1   1   10.90    2.40
 -11   1  -1    0.70    1.80
 -11   1  -1   -1.00    1.90
 -11   1  -1    2.50    1.80
 -11   1  -1    3.20    2.60
  11  -1   1   -0.90    2.40
 -12   1  -1    0.80    2.70
 -12   1  -1    1.30    1.70
 -12   1  -1    6.10    2.30
 -12   1  -1    2.30    2.00
  12  -1   1   -2.20    2.30
 -13   1  -1    0.80    1.90
 -13   1  -1    3.20    2.30
 -13   1  -1   -0.90    2.20
 -13   1  -1    1.80    3.30
  13  -1   1    2.80    2.80
 -14   1  -1   -2.80    2.60
 -14   1  -1    0.00    2.20
 -14   1  -1    2.80    2.70
 -14   1  -1   -0.90    2.80
  14  -1   1   -1.80    2.80
 -15   1  -1    3.20    3.90
 -15   1  -1    0.10    2.60
 -15   1  -1    3.50    2.50
 -15   1  -1   -1.80    2.60
  15  -1   1    1.90    3.20
  15   0  -1    7.60    3.60
 -15   0   1   -2.80    2.80
 -15   0   1    9.00    3.00
 -15   0   1    8.60    2.80
 -15   0   1   16.40    4.50
  14   0  -1    0.10    3.00
 -14   0   1    3.30    3.30
 -14   0   1    2.00    2.10
 -14   0   1    4.20    2.70
 -14   0   1   -5.10    2.40
  13   0  -1   24.00    3.80
 -13   0   1   23.40    4.10
 -13   0   1   29.70    3.20
 -13   0   1   20.50    3.20
 -13   0   1   22.10    3.30
  12   0  -1   -2.50    2.70
 -12   0   1    2.50    2.00
 -12   0   1    0.20    3.00
 -12   0   1   -3.10    1.90
 -12   0   1   -1.00    2.00
  11   0  -1   18.30    3.30
 -11   0   1   19.90    3.50
 -11   0   1   18.60    2.80
 -11   0   1   17.60    2.60
 -11   0   1   18.70    2.70
  10   0  -1    1.40    2.00
 -10   0   1   -1.30    1.40
 -10   0   1    0.20    1.50
 -10   0   1    1.00    1.80
 -10   0   1    1.60    2.20
   9   0  -1   -1.10    1.50
   9   0  -1   -0.70    1.20
   9   0  -1    0.60    0.60
  -9   0   1    0.60    1.80
  -9   0   1    0.10    1.40
  -9   0   1   -1.10    1.40
  -9   0   1   -1.20    1.30
  -9   0   1   -2.30    1.20
   8   0  -1    2.90    0.70
   8   0  -1    3.00    1.70
   8   0  -1    1.70    1.30
  -8   0   1    0.90    1.10
  -8   0   1    4.20    1.40
  -8   0   1    3.60    1.40
  -8   0   1    3.20    1.60
  -8   0   1    2.60    1.10
   7   0  -1   69.79    3.00
   7   0  -1   60.49    2.00
   7   0  -1   61.59    3.20
  -7   0   1   60.39    2.80
  -7   0   1   64.89    2.80
  -7   0   1   60.29    3.20
  -7   0   1   60.79    2.70
  -7   0   1   61.89    2.80
   6   0  -1  391.46   10.20
   6   0  -1  394.26    9.40
   6   0  -1  406.26   10.60
  -6   0   1  390.06   10.10
  -6   0   1  399.46   10.10
  -6   0   1  379.66   10.10
  -6   0   1  386.66   10.40
  -6   0   1  408.36   10.10
   5   0  -1  219.48    6.10
   5   0  -1  231.38    6.50
   5   0  -1  225.28    5.40
  -5   0   1  230.88    6.30
  -5   0   1  218.58    6.10
  -5   0   1  215.88    5.90
  -5   0   1  216.18    6.00
  -5   0   1  224.98    6.10
   4   0  -1   22.70    1.30
   4   0  -1   25.40    0.90
   4   0  -1   25.20    1.30
   4   0  -1   20.60    1.70
   4   0  -1   25.50    1.50
  -4   0   1   25.30    1.50
  -4   0   1   24.60    1.60
  -4   0   1   27.40    1.50
  -4   0   1   27.10    1.40
  -4   0   1   26.40    1.50
   3   0  -1    0.80    1.10
   3   0  -1    2.00    0.70
   3   0  -1    4.00    0.50
   3   0  -1    3.50    0.80
   3   0  -1    1.00    0.70
   3   0  -1    2.00    0.80
   3   0  -1    2.10    0.90
  -3   0   1    3.00    1.10
  -3   0   1    3.40    0.90
  -3   0   1    0.70    0.90
  -3   0   1    1.50    0.70
  -3   0   1    2.50    0.80
  -3   0   1    2.20    0.80
   2   0  -1    1.50    0.40
   2   0  -1    0.90    0.40
   2   0  -1    1.30    0.50
   2   0  -1    0.60    0.50
   2   0  -1    1.20    0.50
   2   0  -1    1.20    0.40
  -2   0   1    0.70    0.40
  -2   0   1    0.60    0.50
  -2   0   1    0.70    0.50
  -2   0   1    0.10    0.40
  -2   0   1    0.50    0.40
  -2   0   1    1.10    0.40
   1   0  -1    1.10    0.20
   1   0  -1    1.40    0.30
   1   0  -1    1.30    0.30
   1   0  -1    1.30    0.20
   1   0  -1    1.20    0.30
  -1   0   1    1.00    0.20
  -1   0   1    0.90    0.30
  -1   0   1    1.00    0.20
  -1   0   1    1.00    0.30
  -1   0   1    1.30    0.30
  -1   0   1    0.60    0.20
  -1   0  -1   86.79    2.30
  -1   0  -1   94.29    2.20
  -1   0  -1   95.49    2.30
  -1   0  -1   89.19    2.30
  -1   0  -1   87.39    2.30
  -1   0  -1   89.39    2.30
   1   0   1   90.89    2.30
   1   0   1   88.29    2.30
   1   0   1   88.99    2.30
   1   0   1   91.59    2.30
   1   0   1   88.79    2.20
  -2   0  -1  129.99    3.30
  -2   0  -1  127.19    3.30
  -2   0  -1  120.59    3.20
  -2   0  -1  122.29    3.20
  -2   0  -1  123.79    3.30
  -2   0  -1  122.69    3.10
   2   0   1  108.29    3.20
   2   0   1  124.19    3.20
   2   0   1  134.89    3.10
   2   0   1  127.09    3.30
   2   0   1  124.79    3.30
   2   0   1  129.49    3.20
  -3   0  -1 3416.06   73.89
  -3   0  -1 3352.86   73.79
  -3   0  -1 2970.10   74.49
  -3   0  -1 3130.09   73.79
  -3   0  -1 3220.68   74.99
  -3   0  -1 3192.88   73.49
   3   0   1 3076.59   73.59
   3   0   1 3180.78   73.49
   3   0   1 2997.40   73.09
   3   0   1 3293.57   74.19
   3   0   1 3173.98   73.59
   3   0   1 3041.30   74.69
  -4   0  -1   19.20    0.90
  -4   0  -1   19.40    1.30
  -4   0  -1   20.50    1.30
  -4   0  -1   17.90    1.20
  -4   0  -1   18.90    1.30
   4   0   1   20.70    1.50
   4   0   1   18.10    1.10
   4   0   1   19.10    1.30
  -5   0  -1   10.70    1.20
  -5   0  -1    8.70    1.30
  -5   0  -1   10.10    1.40
  -5   0  -1    9.60    0.80
  -5   0  -1    9.80    1.40
  -5   0  -1    8.00    1.10
   5   0   1    8.60    1.30
   5   0   1    9.60    1.20
   5   0   1    7.40    0.90
  -6   0  -1   65.29    2.80
  -6   0  -1   61.49    2.60
  -6   0  -1   62.09    3.10
  -6   0  -1   65.89    2.60
  -6   0  -1   68.79    2.90
  -6   0  -1   64.39    2.00
   6   0   1   61.19    3.00
   6   0   1   65.69    2.20
   6   0   1   69.99    2.80
  -7   0  -1   63.09    2.90
  -7   0  -1   73.69    3.40
  -7   0  -1   70.79    2.90
  -7   0  -1   71.39    2.20
  -7   0  -1   68.29    2.90
  -7   0  -1   72.39    3.10
   7   0   1   68.49    3.00
   7   0   1   70.29    2.40
   7   0   1   69.19    3.40
  -8   0  -1    5.20    1.30
  -8   0  -1    8.00    2.10
  -8   0  -1    4.10    1.40
  -8   0  -1    4.40    1.50
  -8   0  -1    4.70    1.40
   8   0   1    4.70    1.40
   8   0   1    4.50    0.80
   8   0   1    6.20    1.90
  -9   0  -1    1.90    1.90
  -9   0  -1    1.00    1.50
  -9   0  -1   -0.30    1.20
  -9   0  -1    0.30    1.40
  -9   0  -1   -0.60    1.10
   9   0   1    0.70    0.70
   9   0   1   -0.20    1.20
   9   0   1    1.70    1.70
 -10   0  -1   79.59    4.00
 -10   0  -1   76.39    4.20
 -10   0  -1   74.49    3.90
 -10   0  -1   82.19    4.00
  10   0   1   83.39    4.40
 -11   0  -1   11.10    2.10
 -11   0  -1   10.20    2.30
 -11   0  -1   11.50    2.40
 -11   0  -1   18.30    3.50
  11   0   1   17.50    3.10
 -12   0  -1   32.00    4.00
 -12   0  -1   26.80    3.50
 -12   0  -1   33.40    3.20
 -12   0  -1   31.70    3.40
  12   0   1   35.70    4.30
 -13   0  -1    4.50    2.20
 -13   0  -1    4.60    2.30
 -13   0  -1    8.20    2.90
 -13   0  -1    6.50    3.40
  13   0   1    5.00    3.00
 -14   0  -1   11.40    3.90
 -14   0  -1    7.40    3.00
 -14   0  -1    4.90    2.60
 -14   0  -1   -2.90    2.60
  14   0   1    6.60    3.30
 -15   0  -1    3.00    3.70
 -15   0  -1    2.70    2.40
 -15   0  -1   -6.70    2.30
 -15   0  -1    4.30    2.80
  15   0   1    6.20    3.80
  16  -1  -1    3.30    3.90
  15  -1  -1    7.90    3.80
 -15   1   1    1.80    2.70
 -15   1   1    8.80    4.00
 -15   1   1   -4.40    2.70
 -15   1   1   -1.10    2.20
  14  -1  -1    2.00    3.00
 -14   1   1    0.00    2.10
 -14   1   1    2.50    2.50
 -14   1   1    2.80    3.60
 -14   1   1    1.70    2.70
  13  -1  -1   -0.90    2.70
 -13   1   1    3.30    2.10
 -13   1   1    2.30    2.30
 -13   1   1    3.80    2.50
 -13   1   1    0.20    3.30
  12  -1  -1   21.80    3.50
 -12   1   1   28.80    3.00
 -12   1   1   25.80    2.60
 -12   1   1   25.90    4.00
 -12   1   1   19.10    3.00
  11  -1  -1    8.40    2.50
 -11   1   1    7.50    1.90
 -11   1   1    5.80    2.50
 -11   1   1    5.50    2.10
 -11   1   1    1.40    1.70
  10  -1  -1   12.40    3.10
  10  -1  -1   14.10    2.50
 -10   1   1    8.60    2.00
 -10   1   1   14.50    2.10
 -10   1   1   16.40    2.90
 -10   1   1   12.80    2.10
   9  -1  -1   65.19    3.30
   9  -1  -1   65.09    3.70
  -9   1   1   67.09    3.20
  -9   1   1   63.29    2.90
  -9   1   1   68.09    3.50
  -9   1   1   67.49    3.20
  -9   1   1   63.09    3.60
   8  -1  -1  118.09    4.70
   8  -1  -1  115.99    4.30
  -8   1   1  110.69    4.70
  -8   1   1  114.09    4.10
  -8   1   1  113.09    4.30
  -8   1   1  121.49    4.10
  -8   1   1  121.99    4.20
   7  -1  -1   23.70    2.50
   7  -1  -1   25.70    2.00
  -7   1   1   22.50    2.20
  -7   1   1   25.00    1.90
  -7   1   1   28.30    1.90
  -7   1   1   30.00    2.00
  -7   1   1   22.50    2.00
   6  -1  -1  154.88    5.10
  -6   1   1  142.69    4.60
  -6   1   1  159.78    5.10
  -6   1   1  153.68    4.50
  -6   1   1  150.38    4.40
  -6   1   1  159.38    4.60
   5  -1  -1   17.10    1.30
   5  -1  -1   18.50    1.70
  -5   1   1   17.00    1.20
  -5   1   1   13.90    1.40
  -5   1   1   17.80    1.50
  -5   1   1   18.70    1.30
  -5   1   1   17.50    1.30
   4  -1  -1 1544.45   36.20
   4  -1  -1 1521.05   36.60
   4  -1  -1 1519.75   36.50
   4  -1  -1 1577.04   36.20
   4  -1  -1 1596.24   36.50
  -4   1   1 1585.14   36.70
  -4   1   1 1628.14   37.30
  -4   1   1 1559.84   36.40
  -4   1   1 1618.44   36.70
  -4   1   1 1562.54   36.30
  -4   1   1 1612.74   37.00
   3  -1  -1  705.43   16.40
   3  -1  -1  683.03   16.30
   3  -1  -1  691.33   16.70
   3  -1  -1  725.63   16.80
   3  -1  -1  706.83   16.40
  -3   1   1  713.43   16.30
  -3   1   1  728.33   16.70
  -3   1   1  713.83   16.50
  -3   1   1  694.83   16.80
  -3   1   1  692.23   16.50
  -3   1   1  690.53   16.40
   2  -1  -1   81.49    2.30
   2  -1  -1   84.39    2.50
   2  -1  -1   86.19    2.10
   2  -1  -1   82.59    2.20
   2  -1  -1   84.59    2.00
  -2   1   1   85.99    2.40
  -2   1   1   85.79    2.10
  -2   1   1   82.29    2.20
  -2   1   1   86.39    2.40
  -2   1   1   82.79    2.50
  -2   1   1   86.19    2.00
  -2   1   1   86.59    2.50
   1  -1  -1   55.59    1.80
   1  -1  -1   54.49    1.60
   1  -1  -1   55.29    1.40
   1  -1  -1   53.99    1.40
  -1   1   1   56.19    1.80
  -1   1   1   53.89    1.40
  -1   1   1   55.89    1.40
  -1   1   1   54.39    1.60
  -1   1   1   55.19    1.60
   0  -1  -1  358.76    8.50
   0  -1  -1  367.06    8.40
   0  -1  -1  348.17    8.60
   0  -1  -1  358.26    8.20
   0  -1  -1  355.36    8.40
   0  -1  -1  354.86    8.50
   0  -1  -1  362.66    8.30
   0   1   1  364.16    8.50
   0   1   1  358.76    8.60
   0   1   1  369.06    8.50
   0   1   1  357.16    8.30
   0   1   1  358.46    8.40
   0   1   1  352.56    8.50
  -1  -1  -1  705.73   16.70
  -1  -1  -1  723.03   16.60
  -1  -1  -1  721.73   16.80
  -1  -1  -1  702.43   16.60
  -1  -1  -1  676.03   16.50
  -1  -1  -1  754.72   17.20
   1   1   1  697.93   16.40
   1   1   1  713.73   16.60
   1   1   1  700.13   16.50
   1   1   1  718.63   16.60
   1   1   1  720.43   16.50
   1   1   1  721.33   16.70
  -2  -1  -1  339.77    8.20
  -2  -1  -1  334.17    8.40
  -2  -1  -1  356.16    8.60
  -2  -1  -1  349.27    8.50
  -2  -1  -1  355.26    8.20
  -2  -1  -1  343.47    8.40
   2   1   1  339.37    8.50
   2   1   1  342.27    8.50
   2   1   1  348.77    8.30
   2   1   1  347.17    8.40
   2   1   1  339.67    8.40
   2   1   1  331.47    8.20
  -3  -1  -1  437.96   10.20
  -3  -1  -1  409.66   10.40
  -3  -1  -1  409.86   10.30
  -3  -1  -1  428.06   10.30
  -3  -1  -1  436.46   10.00
  -3  -1  -1  420.96   10.40
   3   1   1  420.86   10.40
   3   1   1  430.66   10.40
   3   1   1  402.66   10.00
   3   1   1  418.86   10.30
   3   1   1  410.46   10.10
  -4  -1  -1    0.50    0.80
  -4  -1  -1    0.50    0.80
  -4  -1  -1    1.70    0.90
  -4  -1  -1    2.00    0.80
  -4  -1  -1    1.00    0.60
   4   1   1    0.70    1.00
   4   1   1    0.40    0.70
   4   1   1    0.70    0.60
  -5  -1  -1    7.00    1.30
  -5  -1  -1   12.30    1.60
  -5  -1  -1   12.80    1.50
  -5  -1  -1   13.10    1.70
  -5  -1  -1   10.40    1.00
   5   1   1   10.10    1.20
   5   1   1    8.00    1.50
   5   1   1   10.20    1.40
  -6  -1  -1   57.19    2.60
  -6  -1  -1   61.79    2.10
  -6  -1  -1   62.39    3.00
  -6  -1  -1   63.79    2.90
  -6  -1  -1   59.59    3.00
  -6  -1  -1   59.79    2.80
   6   1   1   55.59    3.00
   6   1   1   60.99    2.80
   6   1   1   60.99    2.30
  -7  -1  -1   57.69    2.70
  -7  -1  -1   55.19    2.90
  -7  -1  -1   54.09    2.10
  -7  -1  -1   63.09    3.10
  -7  -1  -1   55.39    2.70
  -7  -1  -1   59.59    3.00
   7   1   1   56.49    2.90
   7   1   1   62.99    3.40
  -8  -1  -1    0.20    1.20
  -8  -1  -1   -0.40    1.70
  -8  -1  -1    3.00    1.50
  -8  -1  -1    1.90    1.50
  -8  -1  -1    0.30    1.20
   8   1   1    0.60    1.50
   8   1   1    0.50    1.20
  -9  -1  -1    6.70    2.30
  -9  -1  -1    5.50    1.70
  -9  -1  -1    4.20    1.60
  -9  -1  -1    3.70    1.50
   9   1   1    4.20    2.00
   9   1   1    1.70    1.50
 -10  -1  -1   10.70    2.20
 -10  -1  -1   12.10    2.20
 -10  -1  -1   15.40    2.90
 -10  -1  -1    8.40    2.00
  10   1   1   10.50    2.60
 -11  -1  -1   -0.30    2.60
 -11  -1  -1   -1.90    2.00
 -11  -1  -1    0.50    2.20
 -11  -1  -1    0.80    2.10
  11   1   1    2.80    2.70
 -12  -1  -1   26.20    3.80
 -12  -1  -1   18.30    3.10
 -12  -1  -1   21.90    3.10
 -12  -1  -1   24.50    3.60
  12   1   1   25.10    3.90
 -13  -1  -1    2.90    2.60
 -13  -1  -1    0.60    2.10
 -13  -1  -1    8.30    2.70
 -13  -1  -1    4.60    3.30
  13   1   1    7.70    3.20
 -14  -1  -1    5.60    3.60
 -14  -1  -1    4.70    2.70
 -14  -1  -1    1.60    2.60
 -14  -1  -1   -2.50    2.60
  14   1   1    9.00    3.70
 -16   2   1    0.40    2.90
 -16   2   1    3.50    2.40
 -16   2   1    4.20    3.20
 -16   2   1    6.80    3.80
 -15   2   1   -2.60    3.40
 -15   2   1    0.70    2.60
 -15   2   1   -0.30    2.00
 -15   2   1   -4.50    2.50
  14  -2  -1    2.90    3.10
 -14   2   1    2.20    3.50
 -14   2   1   -0.20    2.60
 -14   2   1    2.10    2.40
 -14   2   1   -0.30    2.00
  13  -2  -1    7.40    3.10
 -13   2   1    8.10    2.40
 -13   2   1   10.20    2.60
 -13   2   1   10.00    2.30
 -13   2   1   14.90    4.00
  12  -2  -1    0.10    2.70
 -12   2   1    0.50    2.10
 -12   2   1    1.70    2.50
 -12   2   1   -0.60    2.10
 -12   2   1   -1.30    1.40
  11  -2  -1   -0.80    2.10
 -11   2   1    3.20    2.70
 -11   2   1    2.30    1.50
 -11   2   1    0.50    1.80
 -11   2   1    0.40    1.80
  10  -2  -1   49.10    3.60
 -10   2   1   48.00    3.10
 -10   2   1   46.20    3.20
 -10   2   1   52.79    3.80
 -10   2   1   49.70    2.70
 -10   2   1   42.50    2.80
   9  -2  -1  128.89    5.20
  -9   2   1  125.79    4.20
  -9   2   1  120.79    4.40
  -9   2   1  125.79    5.30
  -9   2   1  124.59    4.40
  -9   2   1  122.99    4.70
   8  -2  -1  361.56   10.30
  -8   2   1  352.16    9.50
  -8   2   1  373.66    9.40
  -8   2   1  368.16    9.80
  -8   2   1  355.06    9.50
  -8   2   1  355.56   10.30
   7  -2  -1   38.20    2.20
   7  -2  -1   40.10    2.70
  -7   2   1   38.10    2.80
  -7   2   1   35.80    2.10
  -7   2   1   36.60    2.30
  -7   2   1   38.10    1.90
  -7   2   1   39.20    2.20
   6  -2  -1   45.30    2.20
   6  -2  -1   47.00    2.60
   6  -2  -1   45.70    2.30
  -6   2   1   49.70    2.10
  -6   2   1   44.80    1.90
  -6   2   1   50.39    2.70
  -6   2   1   47.70    2.30
  -6   2   1   47.00    2.10
   5  -2  -1  420.66   10.10
   5  -2  -1  422.56   10.40
  -5   2   1  406.26   10.20
  -5   2   1  400.16   10.70
  -5   2   1  433.46   10.00
  -5   2   1  410.36   10.20
  -5   2   1  412.26   10.30
   4  -2  -1   41.80    1.70
   4  -2  -1   42.70    2.00
   4  -2  -1   42.90    1.90
   4  -2  -1   46.90    1.80
   4  -2  -1   44.10    1.60
  -4   2   1   45.90    1.50
  -4   2   1   43.00    1.90
  -4   2   1   46.60    1.20
  -4   2   1   38.40    2.20
  -4   2   1   44.40    1.80
  -4   2   1   42.90    1.70
  -4   2   1   43.30    2.00
   3  -2  -1    3.30    0.70
   3  -2  -1    4.00    0.90
   3  -2  -1    3.80    0.70
   3  -2  -1    6.10    0.70
   3  -2  -1    3.00    1.10
  -3   2   1    1.90    1.20
  -3   2   1    3.80    0.80
  -3   2   1    5.70    0.60
  -3   2   1    4.70    0.80
  -3   2   1    5.00    0.70
  -3   2   1    3.30    0.50
   2  -2  -1  104.29    2.90
   2  -2  -1  101.19    3.10
   2  -2  -1  104.99    2.70
   2  -2  -1  107.29    3.00
   2  -2  -1  101.39    2.60
  -2   2   1  106.69    2.70
  -2   2   1  102.09    2.60
  -2   2   1  104.19    3.00
  -2   2   1  105.79    3.00
  -2   2   1  101.89    3.20
   1  -2  -1 1217.68   29.80
   1  -2  -1 1275.27   29.80
   1  -2  -1 1292.97   30.80
   1  -2  -1 1307.97   30.00
   1  -2  -1 1330.37   30.60
  -1   2   1 1263.47   30.20
  -1   2   1 1362.46   30.40
  -1   2   1 1323.47   30.70
  -1   2   1 1252.27   29.80
  -1   2   1 1313.87   29.90
  -1   2   1 1260.27   29.80
   0  -2  -1    7.90    0.80
   0  -2  -1    7.80    1.10
   0  -2  -1    7.20    1.00
   0  -2  -1    7.10    0.90
   0  -2  -1    8.20    0.70
   0  -2  -1    8.30    0.40
   0  -2  -1    8.00    1.00
   0   2   1    8.60    0.70
   0   2   1    7.40    1.00
   0   2   1    8.00    0.90
   0   2   1    7.40    1.10
   0   2   1    7.80    0.40
   0   2   1    7.80    0.80
   0   2   1    8.30    1.10
  -1  -2  -1 1216.68   29.30
  -1  -2  -1 1243.78   29.30
  -1  -2  -1 1285.37   28.90
  -1  -2  -1 1265.17   29.00
  -1  -2  -1 1234.18   29.00
  -1  -2  -1 1275.17   29.20
  -1  -2  -1 1235.28   28.80
   1   2   1 1221.78   28.90
   1   2   1 1231.78   28.90
   1   2   1 1221.68   28.80
   1   2   1 1253.87   28.70
   1   2   1 1231.28   29.00
  -2  -2  -1   90.79    3.10
  -2  -2  -1   92.29    2.70
  -2  -2  -1   94.79    3.00
  -2  -2  -1   93.49    2.60
  -2  -2  -1   82.19    2.90
  -2  -2  -1   92.19    2.90
   2   2   1   90.59    3.10
   2   2   1   89.19    3.00
   2   2   1   82.69    2.70
   2   2   1   88.29    2.50
   2   2   1   83.29    3.00
  -3  -2  -1  396.96   10.00
  -3  -2  -1  407.06    9.70
  -3  -2  -1  401.66    9.90
  -3  -2  -1  395.96    9.70
  -3  -2  -1  403.66   10.30
   3   2   1  393.56   10.10
   3   2   1  406.96   10.10
   3   2   1  392.06    9.80
   3   2   1  403.96   10.10
  -4  -2  -1   51.69    2.30
  -4  -2  -1   56.49    2.00
  -4  -2  -1   51.19    2.50
  -4  -2  -1   54.89    2.20
  -4  -2  -1   50.49    2.30
   4   2   1   48.20    2.30
   4   2   1   52.29    2.50
  -5  -2  -1    2.80    1.10
  -5  -2  -1    1.80    1.20
  -5  -2  -1    1.30    0.80
  -5  -2  -1    3.00    1.10
  -5  -2  -1    1.60    1.10
   5   2   1    2.10    1.50
   5   2   1    3.10    1.20
  -6  -2  -1    1.10    1.20
  -6  -2  -1    1.00    1.20
  -6  -2  -1    0.10    0.80
  -6  -2  -1   -0.60    1.20
  -6  -2  -1    0.20    1.20
   6   2   1   -1.10    1.20
   6   2   1    1.50    1.40
  -7  -2  -1    4.60    1.50
  -7  -2  -1    5.00    1.70
  -7  -2  -1    4.60    1.40
  -7  -2  -1    3.40    1.40
  -7  -2  -1    5.20    1.50
   7   2   1    4.90    1.50
   7   2   1    5.20    1.70
  -8  -2  -1    3.40    1.70
  -8  -2  -1    1.50    1.40
  -8  -2  -1    1.10    1.80
  -8  -2  -1    2.70    1.50
  -8  -2  -1    2.60    1.50
   8   2   1    1.00    1.30
   8   2   1    2.70    1.80
  -9  -2  -1   12.80    2.20
  -9  -2  -1   10.10    2.20
  -9  -2  -1   13.00    2.20
  -9  -2  -1   15.00    2.60
   9   2   1   11.70    2.50
 -10  -2  -1    2.30    2.00
 -10  -2  -1   -2.70    2.00
 -10  -2  -1    5.20    2.50
 -10  -2  -1    3.00    2.10
  10   2   1    3.80    2.60
 -11  -2  -1    6.10    2.40
 -11  -2  -1    4.50    2.30
 -11  -2  -1    1.90    2.40
 -11  -2  -1    4.80    2.90
  11   2   1    4.20    2.90
 -12  -2  -1    7.30    2.60
 -12  -2  -1    2.20    2.30
 -12  -2  -1    3.20    3.00
 -12  -2  -1    2.10    2.60
  12   2   1    4.90    3.20
 -13  -2  -1    5.40    3.00
 -13  -2  -1   11.20    3.60
 -13  -2  -1   10.70    2.80
 -13  -2  -1    5.50    2.80
  13   2   1   13.90    3.90
 -14  -2  -1    1.80    3.00
 -14  -2  -1    1.70    2.40
 -14  -2  -1   -7.00    2.70
 -14  -2  -1    5.70    3.50
  14   2   1   -0.90    3.50
 -16   3   1    4.20    3.10
 -16   3   1    5.80    2.80
 -16   3   1    4.10    2.40
 -16   3   1   11.50    4.40
 -15   3   1    4.40    3.50
 -15   3   1    4.70    2.10
 -15   3   1    3.30    2.50
 -15   3   1    0.80    2.70
 -14   3   1    8.20    3.90
 -14   3   1    6.40    2.50
 -14   3   1    0.80    2.50
 -14   3   1    3.00    1.90
 -13   3   1   47.70    4.10
 -13   3   1   56.99    4.70
 -13   3   1   51.49    3.60
 -13   3   1   55.79    3.40
 -12   3   1    9.30    2.20
 -12   3   1    4.10    2.20
 -12   3   1   11.80    3.50
 -12   3   1    5.10    1.60
 -11   3   1    9.60    2.90
 -11   3   1    6.40    1.50
 -11   3   1    5.10    1.70
 -11   3   1    8.20    2.00
  10  -3  -1    9.40    1.70
 -10   3   1   10.40    1.80
 -10   3   1   10.70    1.60
 -10   3   1   12.90    2.50
 -10   3   1   12.40    1.80
 -10   3   1   12.00    1.70
   9  -3  -1    0.50    1.10
  -9   3   1    1.10    1.30
  -9   3   1    0.80    1.00
  -9   3   1    0.50    1.00
  -9   3   1    2.80    1.40
  -9   3   1    2.50    2.00
   8  -3  -1  167.98    5.30
  -8   3   1  165.18    5.30
  -8   3   1  166.08    4.80
  -8   3   1  164.98    5.00
  -8   3   1  165.68    6.00
  -8   3   1  167.28    5.10
   7  -3  -1    7.10    1.30
  -7   3   1    8.60    1.10
  -7   3   1    7.40    1.30
  -7   3   1    9.70    1.40
  -7   3   1    7.70    1.20
  -7   3   1    5.60    1.80
   6  -3  -1   38.40    1.80
   6  -3  -1   39.00    2.10
  -6   3   1   38.70    1.20
  -6   3   1   39.70    1.20
  -6   3   1   38.40    1.90
  -6   3   1   41.50    1.60
  -6   3   1   41.00    2.50
  -6   3   1   41.90    2.00
  -6   3   1   39.80    2.10
   5  -3  -1   10.20    1.40
   5  -3  -1   11.50    1.00
  -5   3   1    8.00    1.50
  -5   3   1   10.80    0.60
  -5   3   1    8.20    0.80
  -5   3   1    8.50    1.20
  -5   3   1    9.40    1.30
  -5   3   1    9.80    1.10
   4  -3  -1  692.43   16.30
   4  -3  -1  689.93   15.80
   4  -3  -1  674.43   15.90
  -4   3   1  688.03   16.20
  -4   3   1  702.13   15.80
  -4   3   1  678.23   16.30
  -4   3   1  692.13   16.00
  -4   3   1  631.64   16.70
  -4   3   1  688.83   15.80
   3  -3  -1  174.38    4.30
   3  -3  -1  172.78    4.70
   3  -3  -1  172.28    4.70
   3  -3  -1  173.98    5.10
  -3   3   1  179.28    4.80
  -3   3   1  177.98    4.40
  -3   3   1  169.68    4.30
  -3   3   1  179.88    4.80
  -3   3   1  164.28    5.20
   2  -3  -1    4.40    0.70
   2  -3  -1   -0.10    0.90
   2  -3  -1    1.40    0.90
   2  -3  -1    1.70    0.60
   2  -3  -1    1.30    1.10
   2  -3  -1    2.70    0.40
   2  -3  -1    1.50    0.80
  -2   3   1    2.30    0.40
  -2   3   1    0.90    1.30
  -2   3   1    2.70    0.50
  -2   3   1    0.90    0.90
  -2   3   1    1.80    0.90
  -2   3   1    3.30    1.20
  -2   3   1    3.10    0.70
   1  -3  -1 2618.14   56.29
   1  -3  -1 2339.47   55.29
   1  -3  -1 2425.36   55.39
   1  -3  -1 2382.76   56.39
   1  -3  -1 2354.56   55.39
  -1   3   1 2501.45   56.49
  -1   3   1 2361.86   55.99
  -1   3   1 2531.85   56.89
  -1   3   1 2368.56   56.09
  -1   3   1 2275.47   55.29
  -1   3   1 2334.57   56.69
   0  -3  -1  504.75   11.80
   0  -3  -1  484.25   12.20
   0  -3  -1  493.85   11.40
   0  -3  -1  490.25   11.90
   0  -3  -1  498.85   11.80
   0  -3  -1  513.85   12.20
   0  -3  -1  491.45   12.20
   0   3   1  500.45   11.40
   0   3   1  478.55   11.80
   0   3   1  474.45   12.10
   0   3   1  505.15   12.10
   0   3   1  497.45   12.20
   0   3   1  489.75   12.10
   0   3   1  500.55   11.80
  -1  -3  -1  131.29    3.50
  -1  -3  -1  126.69    3.20
  -1  -3  -1  119.89    4.00
  -1  -3  -1  118.09    3.60
  -1  -3  -1  122.79    3.60
  -1  -3  -1  120.69    3.80
  -1  -3  -1  117.59    3.90
   1   3   1  127.39    3.90
   1   3   1  120.69    3.60
   1   3   1  123.99    3.90
   1   3   1  120.59    3.80
   1   3   1  119.49    3.20
   1   3   1  122.39    3.70
  -2  -3  -1  268.27    7.00
  -2  -3  -1  273.97    6.80
  -2  -3  -1  269.47    7.30
  -2  -3  -1  264.37    7.40
  -2  -3  -1  269.87    7.00
  -2  -3  -1  267.67    6.60
   2   3   1  263.17    7.20
   2   3   1  257.07    7.10
   2   3   1  260.97    6.50
   2   3   1  257.37    7.10
  -3  -3  -1  417.26    9.80
  -3  -3  -1  377.76   10.00
  -3  -3  -1  380.56    9.70
  -3  -3  -1  394.26   10.40
  -3  -3  -1  398.16   10.00
   3   3   1  393.26   10.20
   3   3   1  403.96   10.30
   3   3   1  399.46   10.20
  -4  -3  -1    2.80    1.10
  -4  -3  -1    4.30    1.00
  -4  -3  -1    4.10    1.10
  -4  -3  -1    4.40    1.20
  -4  -3  -1    2.50    1.30
   4   3   1    5.20    1.50
   4   3   1    3.90    1.20
  -5  -3  -1  402.76   10.30
  -5  -3  -1  391.46   10.00
  -5  -3  -1  368.06   10.30
  -5  -3  -1  393.46    9.80
  -5  -3  -1  384.66   10.70
   5   3   1  413.26   10.80
   5   3   1  392.26   10.50
  -6  -3  -1   26.60    1.70
  -6  -3  -1   24.60    2.10
  -6  -3  -1   29.30    2.30
  -6  -3  -1   28.90    2.20
   6   3   1   27.70    2.50
   6   3   1   30.40    2.60
  -7  -3  -1   15.40    2.30
  -7  -3  -1   18.20    2.20
  -7  -3  -1   16.70    2.20
  -7  -3  -1   17.60    2.10
   7   3   1   19.70    2.60
   7   3   1   18.20    2.50
  -8  -3  -1   68.79    3.50
  -8  -3  -1   65.09    3.60
  -8  -3  -1   64.79    3.50
  -8  -3  -1   59.99    3.40
   8   3   1   58.19    3.40
   8   3   1   61.39    3.90
  -9  -3  -1   15.20    2.40
  -9  -3  -1   13.80    2.30
  -9  -3  -1   14.10    2.80
  -9  -3  -1   13.50    2.50
   9   3   1   19.60    2.90
 -10  -3  -1   12.90    2.70
 -10  -3  -1   17.60    2.70
 -10  -3  -1   20.70    3.50
 -10  -3  -1   19.70    2.80
  10   3   1   17.00    3.40
 -11  -3  -1    5.50    2.40
 -11  -3  -1    7.40    2.90
 -11  -3  -1    4.00    2.60
 -11  -3  -1    7.30    2.40
  11   3   1    7.50    3.00
 -12  -3  -1    2.90    2.50
 -12  -3  -1   -1.10    2.50
 -12  -3  -1    0.90    2.80
 -12  -3  -1   -3.40    2.40
  12   3   1    1.60    3.20
 -13  -3  -1    0.50    2.60
 -13  -3  -1    6.60    4.00
 -13  -3  -1    9.20    3.00
 -13  -3  -1   -1.20    2.50
  13   3   1    1.30    3.10
 -17   4   1   17.30    5.00
 -17   4   1    5.40    3.30
 -17   4   1   -0.60    3.00
 -16   4   1    4.70    3.00
 -16   4   1   15.40    4.60
 -16   4   1    1.90    2.80
 -15   4   1   17.60    4.40
 -15   4   1   12.10    3.00
 -15   4   1   13.30    2.30
 -15   4   1   16.10    3.20
 -14   4   1    0.50    1.70
 -14   4   1   -1.60    2.40
 -14   4   1    0.10    2.20
 -14   4   1    2.00    3.20
 -13   4   1    4.50    1.70
 -13   4   1   11.30    2.70
 -13   4   1   10.80    3.70
 -13   4   1    6.60    2.50
 -12   4   1   22.20    3.00
 -12   4   1   21.00    2.60
 -12   4   1   30.80    4.20
 -12   4   1   20.50    2.30
 -11   4   1   54.69    3.40
 -11   4   1   52.99    3.40
 -11   4   1   51.89    4.00
 -11   4   1   58.19    3.10
 -11   4   1   55.19    2.80
  10  -4  -1  108.19    4.40
 -10   4   1  108.09    4.00
 -10   4   1  116.99    3.80
 -10   4   1  108.79    5.30
 -10   4   1  111.89    4.10
 -10   4   1  107.39    4.50
   9  -4  -1  147.79    5.00
  -9   4   1  143.99    5.80
  -9   4   1  145.39    4.60
  -9   4   1  149.59    4.40
  -9   4   1  142.49    5.10
  -9   4   1  138.59    4.70
   8  -4  -1    1.40    1.10
  -8   4   1    2.30    1.90
  -8   4   1    1.40    1.20
  -8   4   1    2.10    1.20
  -8   4   1    4.50    1.10
  -8   4   1    3.00    0.80
   7  -4  -1   18.20    1.50
   7  -4  -1   15.80    1.90
  -7   4   1   17.10    1.50
  -7   4   1   20.70    1.20
  -7   4   1   13.90    2.20
  -7   4   1   20.20    2.00
  -7   4   1   18.10    1.60
  -7   4   1   16.40    0.90
   6  -4  -1   24.00    1.80
   6  -4  -1   23.70    1.40
  -6   4   1   23.40    2.50
  -6   4   1   25.80    1.70
  -6   4   1   27.80    1.10
  -6   4   1   27.10    1.60
  -6   4   1   24.60    1.90
  -6   4   1   27.00    1.20
   5  -4  -1   98.09    3.30
   5  -4  -1  101.39    3.10
  -5   4   1   93.19    3.80
  -5   4   1   97.39    2.70
  -5   4   1   95.99    3.20
  -5   4   1  101.29    3.40
  -5   4   1   99.29    2.70
  -5   4   1   97.29    2.90
   4  -4  -1    9.80    1.30
   4  -4  -1    7.80    0.80
  -4   4   1   12.40    0.90
  -4   4   1    8.90    1.20
  -4   4   1    9.70    0.90
  -4   4   1    7.70    0.80
  -4   4   1    6.90    1.00
  -4   4   1    8.30    1.60
   3  -4  -1 3328.57   77.69
   3  -4  -1 3243.88   77.79
   3  -4  -1 3306.97   80.39
  -3   4   1 3347.06   81.49
  -3   4   1 3187.88   77.39
  -3   4   1 3592.34   78.09
  -3   4   1 3514.75   77.89
  -3   4   1 3448.16   77.79
  -3   4   1 3426.66   79.19
   2  -4  -1  694.53   16.50
   2  -4  -1  710.23   16.40
   2  -4  -1  702.73   17.00
   2  -4  -1  700.73   16.70
   2  -4  -1  706.33   17.40
  -2   4   1  710.53   16.90
  -2   4   1  703.73   16.80
  -2   4   1  682.13   16.50
  -2   4   1  700.83   16.30
  -2   4   1  702.93   17.20
  -2   4   1  678.73   17.00
   1  -4  -1   64.49    2.20
   1  -4  -1   66.99    2.70
   1  -4  -1   68.19    2.20
   1  -4  -1   68.49    2.80
  -1   4   1   63.39    2.50
  -1   4   1   58.49    2.60
  -1   4   1   65.09    2.80
  -1   4   1   64.39    2.60
  -1   4   1   64.79    2.10
   0  -4  -1   52.29    2.90
   0  -4  -1   52.09    2.00
   0  -4  -1   53.39    2.10
   0  -4  -1   54.59    2.50
   0  -4  -1   57.29    2.30
   0  -4  -1   53.29    1.60
   0   4   1   52.19    2.50
   0   4   1   54.59    1.50
   0   4   1   53.79    2.30
   0   4   1   57.79    2.60
   0   4   1   47.30    2.30
  -1  -4  -1  140.59    4.20
  -1  -4  -1  141.79    3.70
  -1  -4  -1  141.19    4.00
  -1  -4  -1  141.09    4.20
  -1  -4  -1  145.69    4.60
   1   4   1  143.69    4.40
   1   4   1  139.99    4.50
   1   4   1  142.89    4.50
   1   4   1  137.29    3.60
  -2  -4  -1  347.17    9.40
  -2  -4  -1  360.46    8.50
  -2  -4  -1  363.66    8.80
  -2  -4  -1  353.86    9.00
  -2  -4  -1  332.27    8.90
   2   4   1  345.57    9.20
   2   4   1  348.67    9.30
   2   4   1  336.57    9.20
   2   4   1  335.97    8.40
  -3  -4  -1   42.70    1.90
  -3  -4  -1   43.10    2.20
  -3  -4  -1   42.90    2.30
  -3  -4  -1   43.60    2.10
   3   4   1   43.10    2.60
   3   4   1   41.90    2.40
   3   4   1   39.70    2.40
  -4  -4  -1   75.69    3.30
  -4  -4  -1   71.19    2.80
  -4  -4  -1   71.79    3.10
  -4  -4  -1   76.39    2.80
   4   4   1   70.49    3.20
   4   4   1   73.99    3.40
  -5  -4  -1   -0.20    1.10
  -5  -4  -1    2.30    1.20
  -5  -4  -1    0.70    1.10
  -5  -4  -1    0.30    0.90
   5   4   1    1.10    1.30
   5   4   1    2.40    1.50
  -6  -4  -1    9.80    1.70
  -6  -4  -1   10.00    1.80
  -6  -4  -1    9.50    1.60
   6   4   1    7.60    1.70
   6   4   1   11.70    2.10
  -7  -4  -1   21.40    2.40
  -7  -4  -1   17.20    2.30
  -7  -4  -1   19.40    2.30
  -7  -4  -1   21.30    2.40
   7   4   1   17.60    2.40
   7   4   1   19.50    2.80
  -8  -4  -1    9.10    2.20
  -8  -4  -1   11.60    2.40
  -8  -4  -1    8.30    2.20
  -8  -4  -1    8.90    2.00
   8   4   1    6.70    2.50
   8   4   1    8.00    2.00
  -9  -4  -1    4.50    2.20
  -9  -4  -1   -1.30    1.90
  -9  -4  -1    3.00    2.10
  -9  -4  -1    0.90    2.20
   9   4   1    3.20    2.80
 -10  -4  -1   -2.10    2.20
 -10  -4  -1    1.50    2.10
 -10  -4  -1   -1.60    2.10
 -10  -4  -1   -1.40    2.20
  10   4   1    1.60    2.90
 -11  -4  -1    5.50    2.70
 -11  -4  -1    6.90    3.00
 -11  -4  -1   -2.80    2.30
 -11  -4  -1    6.00    2.50
  11   4   1    5.00    3.20
 -12  -4  -1    5.90    2.80
 -12  -4  -1    3.20    2.90
 -12  -4  -1   -5.60    2.50
  12   4   1    5.60    3.20
 -13  -4  -1   -3.00    2.30
 -13  -4  -1    0.90    3.10
  13   4   1    1.70    3.70
 -17   5   1    0.80    3.00
 -17   5   1    1.70    3.00
 -17   5   1   14.40    4.70
 -16   5   1   52.29    5.50
 -16   5   1   32.90    4.40
 -16   5   1   49.00    4.40
 -15   5   1    8.20    2.70
 -15   5   1    7.60    2.90
 -15   5   1   17.80    4.80
 -14   5   1    6.80    1.80
 -14   5   1    9.10    2.70
 -14   5   1   12.00    2.80
 -14   5   1   12.50    4.20
 -13   5   1   53.29    4.00
 -13   5   1   51.69    3.10
 -13   5   1   57.89    5.20
 -13   5   1   52.09    3.50
 -12   5   1    3.00    1.80
 -12   5   1    3.40    2.00
 -12   5   1    3.20    1.30
 -12   5   1    3.60    2.80
 -11   5   1   48.10    2.40
 -11   5   1   47.40    3.30
 -11   5   1   48.00    2.70
 -11   5   1   43.70    2.80
 -11   5   1   46.80    3.90
  10  -5  -1   55.49    3.20
 -10   5   1   59.99    3.30
 -10   5   1   59.69    2.50
 -10   5   1   58.39    3.10
 -10   5   1   56.59    3.90
 -10   5   1   62.49    2.90
   9  -5  -1  177.58    5.70
  -9   5   1  168.28    6.60
  -9   5   1  170.98    4.30
  -9   5   1  176.78    5.30
  -9   5   1  178.08    5.80
  -9   5   1  177.28    5.40
  -9   5   1  169.48    4.30
  -9   5   1  173.98    4.90
   8  -5  -1   99.89    3.80
   8  -5  -1  104.89    3.30
  -8   5   1  100.49    3.50
  -8   5   1   95.29    3.40
  -8   5   1   99.49    3.00
  -8   5   1   97.59    2.70
  -8   5   1   94.59    4.50
  -8   5   1  103.09    3.90
   7  -5  -1   69.89    2.40
   7  -5  -1   66.09    3.00
  -7   5   1   69.19    3.10
  -7   5   1   67.59    2.60
  -7   5   1   71.59    2.80
  -7   5   1   66.39    2.20
  -7   5   1   69.49    2.20
  -7   5   1   60.49    3.60
   6  -5  -1   73.09    2.90
  -6   5   1   72.09    2.80
  -6   5   1   67.89    3.50
  -6   5   1   70.49    2.30
  -6   5   1   75.49    2.20
  -6   5   1   70.29    2.50
  -6   5   1   79.49    3.10
   5  -5  -1  275.37    6.90
   5  -5  -1  274.17    7.30
  -5   5   1  285.07    6.90
  -5   5   1  280.57    6.90
  -5   5   1  267.17    8.10
  -5   5   1  275.97    7.50
  -5   5   1  274.17    6.80
  -5   5   1  278.17    7.40
   4  -5  -1  119.69    3.20
   4  -5  -1  117.69    3.70
  -4   5   1  120.79    3.90
  -4   5   1  118.99    3.20
  -4   5   1  122.69    4.40
  -4   5   1  120.29    3.20
  -4   5   1  118.69    3.90
   3  -5  -1  440.66   11.00
   3  -5  -1  432.66   11.30
  -3   5   1  455.35   10.30
  -3   5   1  423.76   11.50
  -3   5   1  458.25   11.30
  -3   5   1  435.86   11.70
  -3   5   1  456.75   10.60
  -3   5   1  443.66   11.20
   2  -5  -1   83.89    2.90
   2  -5  -1   84.59    3.20
   2  -5  -1   82.79    2.70
   2  -5  -1   88.89    2.70
  -2   5   1   84.79    3.20
  -2   5   1   87.59    3.50
  -2   5   1   80.89    3.30
  -2   5   1   84.49    3.10
  -2   5   1   89.99    2.70
   1  -5  -1   70.99    2.60
   1  -5  -1   74.59    3.00
   1  -5  -1   71.89    2.50
  -1   5   1   75.39    3.00
  -1   5   1   75.59    3.20
  -1   5   1   74.29    3.20
  -1   5   1   71.69    2.90
   0  -5  -1    8.70    1.50
   0  -5  -1    7.10    1.20
   0  -5  -1    6.10    0.70
   0  -5  -1    7.10    1.10
   0  -5  -1    4.40    1.00
   0   5   1    5.20    1.20
   0   5   1    5.40    1.20
   0   5   1    5.20    0.60
   0   5   1    7.30    1.50
   0   5   1    4.30    1.40
  -1  -5  -1   75.19    2.90
  -1  -5  -1   75.39    3.20
  -1  -5  -1   67.59    2.80
  -1  -5  -1   79.79    2.80
  -1  -5  -1   73.49    2.30
   1   5   1   68.39    3.20
   1   5   1   73.09    3.10
   1   5   1   70.89    3.10
   1   5   1   73.09    2.20
  -2  -5  -1    0.20    1.00
  -2  -5  -1    1.40    1.00
  -2  -5  -1    2.00    1.10
  -2  -5  -1    1.70    1.40
  -2  -5  -1    2.10    0.90
   2   5   1    1.90    1.40
   2   5   1    1.60    1.20
   2   5   1    1.00    1.20
  -3  -5  -1   -1.10    1.00
  -3  -5  -1   -0.50    1.10
  -3  -5  -1   -0.90    0.90
  -3  -5  -1   -0.70    0.90
   3   5   1    0.20    1.30
   3   5   1   -0.90    1.10
  -4  -5  -1   28.20    1.90
  -4  -5  -1   24.10    2.10
  -4  -5  -1   23.20    2.10
   4   5   1   28.40    2.50
   4   5   1   27.40    2.50
  -5  -5  -1   76.19    3.20
  -5  -5  -1   72.39    3.40
  -5  -5  -1   72.39    3.50
   5   5   1   79.29    3.70
   5   5   1   76.49    3.90
  -6  -5  -1    2.00    1.50
  -6  -5  -1    3.20    1.50
  -6  -5  -1   -0.20    1.40
   6   5   1   -1.40    1.40
   6   5   1    2.50    1.90
  -7  -5  -1    8.70    2.10
  -7  -5  -1    2.30    1.80
  -7  -5  -1    5.50    2.10
  -7  -5  -1    2.70    1.80
   7   5   1    4.00    2.40
   7   5   1    5.80    2.00
  -8  -5  -1   13.50    2.40
  -8  -5  -1    7.40    2.30
  -8  -5  -1    8.50    2.30
  -8  -5  -1   11.80    2.40
   8   5   1   14.50    2.90
  -9  -5  -1    1.10    2.20
  -9  -5  -1    1.20    2.30
  -9  -5  -1    0.00    2.10
  -9  -5  -1   -0.30    2.20
   9   5   1   -4.00    2.40
 -10  -5  -1    0.00    2.50
 -10  -5  -1    3.60    4.40
 -10  -5  -1    4.60    2.70
 -10  -5  -1    5.50    2.50
  10   5   1   -0.40    2.80
 -11  -5  -1   12.70    3.00
 -11  -5  -1    5.60    2.70
  11   5   1    9.30    3.40
 -12  -5  -1    4.30    3.30
 -12  -5  -1    6.60    3.00
  12   5   1    0.60    3.00
 -17   6   1   10.20    4.70
 -17   6   1    0.70    2.60
 -17   6   1   -0.40    2.80
 -16   6   1    1.60    2.60
 -16   6   1    3.90    2.50
 -16   6   1   11.80    4.70
 -15   6   1    3.70    2.50
 -15   6   1    4.80    2.50
 -15   6   1   11.80    4.50
 -14   6   1   -2.40    2.10
 -14   6   1    0.20    1.50
 -14   6   1   12.30    4.10
 -14   6   1    2.40    2.20
 -13   6   1   38.90    3.70
 -13   6   1   37.10    3.10
 -13   6   1   36.00    2.50
 -13   6   1   36.50    4.30
 -12   6   1   34.60    2.30
 -12   6   1   39.00    3.10
 -12   6   1   41.00    3.50
 -12   6   1   35.30    4.00
 -11   6   1    9.70    2.80
 -11   6   1    9.50    1.60
 -11   6   1    9.60    2.00
 -11   6   1   10.10    1.90
 -11   6   1   12.60    1.60
  10  -6  -1    1.90    1.30
 -10   6   1   -0.30    0.50
 -10   6   1    0.80    0.60
 -10   6   1    0.30    1.10
 -10   6   1   -0.20    1.20
 -10   6   1    1.00    0.80
 -10   6   1   -2.60    2.20
 -10   6   1   -0.10    1.30
   9  -6  -1    1.90    1.30
  -9   6   1    2.40    0.60
  -9   6   1    3.30    2.10
  -9   6   1    2.60    0.80
  -9   6   1    2.20    1.30
  -9   6   1    3.10    1.40
  -9   6   1    2.30    1.10
   8  -6  -1    0.40    1.00
  -8   6   1   -0.20    1.10
  -8   6   1    1.50    1.80
  -8   6   1    0.70    1.00
  -8   6   1   -0.30    0.60
  -8   6   1    0.10    0.60
  -8   6   1    1.60    1.00
   7  -6  -1   -0.80    0.90
  -7   6   1   -0.10    0.60
  -7   6   1    1.20    1.20
  -7   6   1   -1.20    1.70
  -7   6   1    1.10    1.00
  -7   6   1    0.60    0.90
   6  -6  -1   50.49    2.40
  -6   6   1   46.20    2.70
  -6   6   1   49.40    1.80
  -6   6   1   43.90    2.60
  -6   6   1   52.49    2.50
  -6   6   1   46.60    3.40
  -6   6   1   51.89    1.90
   5  -6  -1    2.60    0.80
   5  -6  -1    2.70    1.00
  -5   6   1    1.40    0.60
  -5   6   1    2.40    0.70
  -5   6   1    1.50    1.80
  -5   6   1    0.50    1.10
  -5   6   1    1.90    1.00
   4  -6  -1   88.19    2.50
   4  -6  -1   90.89    3.20
  -4   6   1   84.29    3.30
  -4   6   1   90.29    2.60
  -4   6   1   87.89    2.40
  -4   6   1   87.49    3.90
  -4   6   1   83.89    3.40
  -4   6   1   90.49    3.90
   3  -6  -1  100.79    3.20
   3  -6  -1   99.59    3.40
  -3   6   1  100.29    3.00
  -3   6   1   94.59    3.90
  -3   6   1   96.79    3.70
  -3   6   1   98.59    3.60
  -3   6   1  100.29    4.20
   2  -6  -1  113.59    4.10
   2  -6  -1  113.89    3.60
   2  -6  -1  115.29    4.00
  -2   6   1  110.19    4.00
  -2   6   1  115.29    4.40
  -2   6   1  120.29    4.50
  -2   6   1  110.29    4.00
   1  -6  -1   42.30    2.20
   1  -6  -1   44.20    2.40
   1  -6  -1   37.50    3.20
   1  -6  -1   40.80    2.00
  -1   6   1   42.10    2.50
  -1   6   1   40.50    2.50
  -1   6   1   45.90    2.70
  -1   6   1   43.00    2.70
   0  -6  -1   10.30    1.40
   0  -6  -1   10.50    1.80
   0  -6  -1   12.40    1.50
   0  -6  -1   10.30    1.00
   0  -6  -1   12.00    1.60
   0   6   1   11.70    1.80
   0   6   1   10.20    1.50
   0   6   1   15.50    2.10
   0   6   1   10.50    0.80
   0   6   1   11.60    1.90
  -1  -6  -1  295.07    8.00
  -1  -6  -1  290.27    8.30
  -1  -6  -1  282.27    7.70
  -1  -6  -1  295.47    8.00
  -1  -6  -1  292.07    7.30
   1   6   1  287.37    7.20
   1   6   1  291.97    8.40
   1   6   1  297.57    8.30
   1   6   1  294.67    8.50
  -2  -6  -1    0.90    1.20
  -2  -6  -1    0.80    1.10
  -2  -6  -1   -1.20    0.80
   2   6   1   -1.30    1.10
   2   6   1   -2.00    1.30
   2   6   1    0.70    1.20
  -3  -6  -1   23.90    1.80
  -3  -6  -1   20.70    2.10
  -3  -6  -1   23.60    2.20
   3   6   1   22.80    2.50
   3   6   1   24.80    2.50
  -4  -6  -1    0.10    1.50
  -4  -6  -1    0.10    1.20
  -4  -6  -1    0.30    1.30
   4   6   1    2.00    1.70
   4   6   1    1.00    1.60
  -5  -6  -1   -0.70    1.60
  -5  -6  -1    0.10    1.30
  -5  -6  -1    0.80    1.60
   5   6   1   -1.10    1.50
   5   6   1   -1.20    1.70
  -6  -6  -1   22.10    2.60
  -6  -6  -1   19.00    2.60
  -6  -6  -1   17.50    2.50
   6   6   1   16.60    2.70
   6   6   1   18.20    2.70
  -7  -6  -1    1.20    2.10
  -7  -6  -1    0.80    1.90
  -7  -6  -1    1.10    1.90
  -7  -6  -1   -0.60    1.80
   7   6   1   -0.10    2.30
   7   6   1   -2.20    1.80
  -8  -6  -1   -3.60    1.90
  -8  -6  -1    0.70    2.10
  -8  -6  -1   -2.60    1.90
  -8  -6  -1    2.00    2.00
   8   6   1   -2.10    2.40
  -9  -6  -1    2.40    2.30
  -9  -6  -1    0.90    2.30
   9   6   1   -1.70    2.80
 -10  -6  -1    3.10    3.00
 -10  -6  -1    2.00    2.60
  10   6   1   -5.50    2.60
 -11  -6  -1    4.50    2.70
 -11  -6  -1    2.10    2.70
  11   6   1    4.90    3.40
 -17   7   1   11.50    3.20
 -17   7   1    0.50    2.70
 -17   7   1   12.20    4.50
 -16   7   1   -1.90    2.50
 -16   7   1   -0.60    2.40
 -16   7   1    0.80    3.70
 -15   7   1    2.30    2.50
 -15   7   1    4.80    2.40
 -15   7   1    4.40    4.10
 -14   7   1   12.80    2.70
 -14   7   1   16.30    2.90
 -14   7   1   18.40    4.20
 -13   7   1    8.00    1.50
 -13   7   1   12.80    2.50
 -13   7   1   17.80    4.20
 -13   7   1   10.70    2.20
 -12   7   1   17.40    2.40
 -12   7   1   19.70    3.70
 -12   7   1   16.30    1.80
 -12   7   1   15.40    2.40
 -11   7   1   55.79    2.10
 -11   7   1   62.19    4.70
 -11   7   1   56.89    3.10
 -11   7   1   56.09    3.50
 -11   7   1   57.79    2.40
 -11   7   1   58.39    2.90
 -10   7   1   14.00    2.00
 -10   7   1   12.70    1.80
 -10   7   1   12.00    1.30
 -10   7   1   10.00    1.10
 -10   7   1   10.50    1.50
 -10   7   1   16.70    3.40
  -9   7   1    0.50    1.10
  -9   7   1    0.80    1.30
  -9   7   1    0.30    1.10
  -9   7   1   -1.00    0.60
  -9   7   1   -0.40    2.20
   8  -7  -1   26.40    2.70
  -8   7   1   30.00    2.20
  -8   7   1   31.70    2.50
  -8   7   1   31.30    1.50
  -8   7   1   26.30    3.00
  -8   7   1   29.60    1.90
   7  -7  -1   23.70    2.00
  -7   7   1   25.10    2.10
  -7   7   1   24.40    2.20
  -7   7   1   26.60    1.40
  -7   7   1   24.00    2.20
  -7   7   1   24.90    1.60
  -7   7   1   25.10    2.80
   6  -7  -1  290.37    7.80
   6  -7  -1  290.27    7.70
  -6   7   1  292.27    8.20
  -6   7   1  281.27    7.20
  -6   7   1  290.67    7.20
  -6   7   1  296.67    9.10
  -6   7   1  295.47    8.10
   5  -7  -1  912.01   20.80
   5  -7  -1  894.91   21.40
  -5   7   1  912.61   22.70
  -5   7   1  863.11   21.70
  -5   7   1  892.91   21.80
  -5   7   1  886.81   20.70
  -5   7   1  883.31   22.30
  -5   7   1  898.91   20.90
   4  -7  -1  575.54   14.10
  -4   7   1  573.64   15.20
  -4   7   1  587.24   13.70
  -4   7   1  578.24   14.60
  -4   7   1  564.54   13.20
  -4   7   1  555.94   14.90
  -4   7   1  560.54   14.50
   3  -7  -1  577.54   14.60
   3  -7  -1  608.04   14.80
  -3   7   1  592.04   15.10
  -3   7   1  603.14   15.70
  -3   7   1  604.24   15.50
  -3   7   1  598.04   15.20
   2  -7  -1  231.58    6.30
   2  -7  -1  215.68    6.50
  -2   7   1  220.38    6.70
  -2   7   1  224.68    7.10
  -2   7   1  211.98    7.00
  -2   7   1  225.08    6.80
   1  -7  -1   10.30    1.80
   1  -7  -1    6.10    0.70
   1  -7  -1    6.60    1.30
   1  -7  -1    4.90    1.20
  -1   7   1    9.20    2.00
  -1   7   1    4.20    1.60
  -1   7   1    5.40    1.40
  -1   7   1    4.70    1.40
   0  -7  -1   26.10    2.10
   0  -7  -1   27.40    2.00
   0  -7  -1   28.60    1.40
   0  -7  -1   28.40    2.30
   0   7   1   34.60    2.70
   0   7   1   27.90    1.20
   0   7   1   24.60    2.30
   0   7   1   31.90    2.50
   0   7   1   33.80    2.60
  -1  -7  -1   85.89    3.50
  -1  -7  -1   84.89    3.60
  -1  -7  -1   84.49    2.80
   1   7   1   86.69    3.90
   1   7   1   89.39    4.20
   1   7   1   84.69    2.60
   1   7   1   80.89    3.70
  -2  -7  -1   31.40    2.30
  -2  -7  -1   34.90    1.90
  -2  -7  -1   30.30    2.40
   2   7   1   31.80    2.80
   2   7   1   32.80    2.50
   2   7   1   34.60    2.90
  -3  -7  -1    3.00    1.40
  -3  -7  -1    3.70    1.50
  -3  -7  -1    4.40    1.30
   3   7   1    6.50    1.90
   3   7   1    5.40    1.90
  -4  -7  -1   90.99    4.20
  -4  -7  -1   90.39    4.00
  -4  -7  -1   96.99    3.70
   4   7   1   89.59    4.30
   4   7   1   97.09    4.70
  -5  -7  -1    2.80    1.90
  -5  -7  -1    2.40    1.60
  -5  -7  -1    6.30    2.00
   5   7   1   -1.80    1.80
   5   7   1    2.30    2.30
  -6  -7  -1   10.60    2.10
  -6  -7  -1   13.90    2.30
  -6  -7  -1   13.90    2.60
   6   7   1    7.20    2.20
   6   7   1   10.90    2.70
  -7  -7  -1    4.70    2.10
  -7  -7  -1    0.60    2.40
   7   7   1    6.10    3.10
  -8  -7  -1   -1.10    2.20
  -8  -7  -1    1.30    2.00
   8   7   1   -4.50    2.90
  -9  -7  -1   -1.30    2.50
  -9  -7  -1    3.10    2.30
   9   7   1   -1.00    2.80
 -10  -7  -1    3.30    2.50
 -10  -7  -1   -1.60    3.00
  10   7   1   -0.50    3.70
 -17   8   1    6.00    4.20
 -17   8   1    4.60    2.80
 -17   8   1   -2.20    2.40
 -16   8   1    3.60    2.60
 -16   8   1    4.80    3.90
 -16   8   1   -3.30    2.20
 -15   8   1    3.00    4.10
 -15   8   1    1.60    2.40
 -15   8   1    1.40    2.20
 -14   8   1   29.10    5.20
 -14   8   1   22.60    3.10
 -14   8   1   24.70    3.20
 -13   8   1   33.70    4.90
 -13   8   1   28.80    3.00
 -13   8   1   27.70    3.40
 -12   8   1   12.60    3.40
 -12   8   1   12.10    2.20
 -12   8   1    7.10    1.20
 -12   8   1    8.00    2.10
 -11   8   1    5.40    2.70
 -11   8   1    1.30    1.30
 -11   8   1    3.60    1.70
 -11   8   1    2.10    1.50
 -11   8   1    1.80    0.80
 -10   8   1   -1.30    2.40
 -10   8   1   -1.30    1.10
 -10   8   1    0.30    1.20
 -10   8   1    0.60    1.40
 -10   8   1   -0.10    0.70
  -9   8   1   26.50    2.60
  -9   8   1   30.30    3.30
  -9   8   1   25.90    2.20
  -9   8   1   26.00    1.40
  -9   8   1   25.80    2.00
  -8   8   1  167.58    6.90
  -8   8   1  171.58    5.50
  -8   8   1  175.58    4.60
  -8   8   1  165.98    5.80
  -8   8   1  168.38    5.80
  -8   8   1  171.18    4.90
   7  -8  -1    6.10    1.60
  -7   8   1    2.70    1.30
  -7   8   1    1.60    2.10
  -7   8   1    4.10    0.90
  -7   8   1    5.20    0.90
  -7   8   1    5.20    1.40
  -7   8   1    5.20    1.00
   6  -8  -1    3.50    1.10
  -6   8   1    2.10    2.10
  -6   8   1    3.10    0.80
  -6   8   1    1.40    0.70
  -6   8   1    2.20    1.30
  -6   8   1    2.80    1.30
  -6   8   1    4.20    1.70
   5  -8  -1   97.29    3.40
  -5   8   1   90.19    4.20
  -5   8   1   89.19    3.80
  -5   8   1   90.19    2.50
  -5   8   1   91.69    3.80
  -5   8   1   92.09    4.60
  -5   8   1   98.59    3.30
   4  -8  -1  108.79    3.70
  -4   8   1  102.69    4.70
  -4   8   1  103.89    4.10
  -4   8   1  108.09    4.20
  -4   8   1  103.49    4.50
   3  -8  -1   25.90    2.00
   3  -8  -1   27.80    2.10
  -3   8   1   33.10    2.90
  -3   8   1   26.90    2.30
  -3   8   1   26.70    2.40
  -3   8   1   33.50    2.80
   2  -8  -1   80.99    3.30
  -2   8   1   78.59    3.90
  -2   8   1   80.09    3.70
  -2   8   1   82.49    4.00
  -2   8   1   76.39    3.70
   1  -8  -1    7.40    1.40
   1  -8  -1    6.50    1.30
  -1   8   1    6.40    1.70
  -1   8   1    6.20    1.50
  -1   8   1    9.30    2.00
  -1   8   1    9.40    2.10
   0  -8  -1    7.70    1.10
   0  -8  -1    6.00    1.60
   0  -8  -1    5.90    1.30
   0   8   1    7.60    1.70
   0   8   1    4.10    1.50
   0   8   1    7.30    1.90
   0   8   1    9.40    1.90
   0   8   1    5.40    0.80
  -1  -8  -1    4.90    1.50
  -1  -8  -1    3.80    1.60
  -1  -8  -1    6.90    1.10
   1   8   1    5.10    1.90
   1   8   1    4.80    0.80
   1   8   1    3.70    1.60
   1   8   1    4.10    1.50
  -2  -8  -1    1.00    1.10
  -2  -8  -1   -1.80    1.50
  -2  -8  -1    1.30    1.40
   2   8   1    1.60    1.40
   2   8   1    1.70    2.00
   2   8   1   -0.60    1.50
  -3  -8  -1   56.69    3.40
  -3  -8  -1   52.79    3.30
  -3  -8  -1   53.69    2.70
   3   8   1   53.69    3.70
   3   8   1   53.49    3.80
  -4  -8  -1   60.89    3.50
  -4  -8  -1   64.89    4.10
  -4  -8  -1   67.79    3.20
   4   8   1   64.29    4.50
   4   8   1   63.79    4.00
  -5  -8  -1   54.09    3.30
  -5  -8  -1   52.79    3.80
   5   8   1   55.79    4.50
   5   8   1   50.29    3.80
  -6  -8  -1   13.40    2.30
  -6  -8  -1   12.80    3.00
   6   8   1   13.40    3.00
   6   8   1   11.20    2.60
  -7  -8  -1    8.40    2.30
  -7  -8  -1   10.90    2.80
   7   8   1    1.10    3.10
  -8  -8  -1    3.70    3.00
  -8  -8  -1    6.80    2.40
   8   8   1    1.70    3.30
  -9  -8  -1    7.70    3.30
   9   8   1    0.50    3.30
 -17   9   1   20.40    3.40
 -17   9   1   31.50    5.20
 -17   9   1   17.70    3.40
 -16   9   1   12.60    3.00
 -16   9   1   12.30    3.00
 -16   9   1   34.60    5.70
 -15   9   1    1.00    2.20
 -15   9   1    2.20    2.20
 -15   9   1    8.30    4.00
 -14   9   1   18.60    2.70
 -14   9   1   16.20    2.80
 -14   9   1   18.40    4.70
 -13   9   1   83.89    4.10
 -13   9   1   78.09    4.60
 -13   9   1   80.59    5.80
 -12   9   1   55.19    3.20
 -12   9   1   62.39    5.40
 -12   9   1   57.49    3.90
 -11   9   1   30.20    2.50
 -11   9   1   28.30    2.40
 -11   9   1   21.90    3.80
 -11   9   1   26.50    2.90
 -11   9   1   21.70    1.70
 -10   9   1   16.80    2.30
 -10   9   1   18.80    2.40
 -10   9   1   18.70    1.90
 -10   9   1   18.90    1.40
 -10   9   1   25.20    3.90
 -10   9   1   19.60    2.10
  -9   9   1   34.60    3.60
  -9   9   1   35.70    2.80
  -9   9   1   30.00    2.70
  -9   9   1   34.00    2.10
  -9   9   1   33.70    1.70
  -9   9   1   32.70    2.50
  -8   9   1   89.09    2.90
  -8   9   1   83.19    4.80
  -8   9   1   86.89    3.00
  -8   9   1   83.29    3.90
  -8   9   1   84.79    3.70
  -8   9   1   85.69    2.80
  -7   9   1   40.60    2.80
  -7   9   1   40.40    3.70
  -7   9   1   37.60    1.70
  -7   9   1   37.60    3.10
  -7   9   1   37.60    2.70
  -7   9   1   36.50    1.70
   6  -9  -1  137.59    4.50
  -6   9   1  147.09    5.70
  -6   9   1  134.39    5.90
  -6   9   1  136.19    3.70
  -6   9   1  136.59    5.10
  -6   9   1  136.69    5.00
   5  -9  -1   26.10    2.00
  -5   9   1   24.50    2.30
  -5   9   1   27.40    1.00
  -5   9   1   30.60    2.50
  -5   9   1   27.70    3.30
  -5   9   1   26.80    2.90
   4  -9  -1  178.08    5.50
  -4   9   1  191.98    6.90
  -4   9   1  176.68    6.10
  -4   9   1  176.68    6.00
  -4   9   1  187.48    6.80
   3  -9  -1   41.70    2.60
   3  -9  -1   36.30    2.30
  -3   9   1   39.50    2.80
  -3   9   1   44.30    3.30
  -3   9   1   41.20    2.90
  -3   9   1   41.80    3.30
   2  -9  -1   53.49    2.90
  -2   9   1   47.70    3.40
  -2   9   1   51.19    3.20
  -2   9   1   51.19    3.40
  -2   9   1   53.89    3.30
   1  -9  -1   10.50    1.90
   1  -9  -1    8.10    1.50
  -1   9   1   11.20    2.20
  -1   9   1    6.60    1.60
  -1   9   1   10.70    1.80
  -1   9   1   10.80    2.20
   0  -9  -1    5.20    1.80
   0  -9  -1    2.30    1.40
   0  -9  -1    4.30    1.00
   0   9   1    5.60    2.20
   0   9   1    6.60    1.80
   0   9   1    5.30    1.80
   0   9   1    4.60    0.70
   0   9   1    5.30    1.60
  -1  -9  -1    4.50    1.80
  -1  -9  -1    1.00    1.00
  -1  -9  -1    0.10    1.40
   1   9   1    2.90    1.70
   1   9   1    0.40    1.90
  -2  -9  -1    5.10    1.90
  -2  -9  -1    6.10    1.40
   2   9   1    8.40    2.30
   2   9   1    4.20    2.40
  -3  -9  -1   23.60    3.30
  -3  -9  -1   23.80    2.30
   3   9   1   22.90    3.00
   3   9   1   25.10    3.30
  -4  -9  -1   79.39    3.60
  -4  -9  -1   72.49    4.30
   4   9   1   77.19    5.20
   4   9   1   71.99    4.50
  -5  -9  -1   -1.80    2.40
   5   9   1    2.40    2.50
   5   9   1   -3.00    1.90
  -6  -9  -1   -0.70    2.60
   6   9   1    0.50    2.60
  -7  -9  -1    0.60    2.50
   7   9   1    1.10    2.90
  -8  -9  -1   -0.60    3.00
   8   9   1    0.10    3.00
 -17  10   1   -1.80    2.40
 -17  10   1    6.40    4.30
 -17  10   1   -2.60    2.30
 -16  10   1   11.30    2.80
 -16  10   1   16.30    4.80
 -16  10   1   15.60    2.70
 -15  10   1   -1.00    2.10
 -15  10   1    2.30    3.80
 -15  10   1    1.70    2.10
 -14  10   1    9.20    4.60
 -14  10   1    7.20    2.20
 -14  10   1   11.40    2.60
 -13  10   1   16.40    2.70
 -13  10   1   21.90    4.90
 -13  10   1   21.80    2.80
 -12  10   1   17.00    2.40
 -12  10   1   22.90    4.60
 -12  10   1   15.50    2.40
 -12  10   1   15.80    2.50
 -11  10   1   33.50    4.70
 -11  10   1   26.20    2.50
 -11  10   1   26.10    3.00
 -11  10   1   27.10    3.10
 -11  10   1   30.00    2.40
 -10  10   1    3.50    1.30
 -10  10   1    3.50    1.50
 -10  10   1    3.80    1.30
 -10  10   1    2.80    2.80
 -10  10   1    3.20    1.70
 -10  10   1    4.30    1.70
  -9  10   1   11.60    2.80
  -9  10   1   17.60    3.70
  -9  10   1   12.50    1.90
  -9  10   1   11.50    1.40
  -9  10   1   11.20    1.90
  -9  10   1   14.40    1.60
  -8  10   1  337.87   10.60
  -8  10   1  327.47   10.90
  -8  10   1  338.57    8.60
  -8  10   1  319.57    9.50
  -8  10   1  335.87    9.60
  -8  10   1  325.07    8.40
  -7  10   1   14.50    2.60
  -7  10   1   17.10    2.40
  -7  10   1   13.60    1.90
  -7  10   1   19.80    3.30
  -7  10   1   18.30    1.30
   6 -10  -1   84.89    3.30
  -6  10   1   81.49    4.70
  -6  10   1   85.69    2.40
  -6  10   1   88.89    4.00
  -6  10   1   84.59    4.90
  -6  10   1   82.89    4.10
   5 -10  -1    1.30    1.00
  -5  10   1   -0.10    1.70
  -5  10   1    3.20    2.30
  -5  10   1    1.20    1.40
  -5  10   1    0.60    1.40
   4 -10  -1    5.70    1.30
  -4  10   1    2.80    1.50
  -4  10   1    5.10    1.60
  -4  10   1    5.00    2.00
  -4  10   1    6.00    2.40
   3 -10  -1   -0.50    1.30
   3 -10  -1    1.40    1.20
  -3  10   1    1.90    1.60
  -3  10   1    0.40    1.30
  -3  10   1    1.90    2.00
  -3  10   1   -0.20    1.90
   2 -10  -1   49.40    3.10
  -2  10   1   42.10    3.20
  -2  10   1   43.50    3.30
  -2  10   1   50.79    3.60
  -2  10   1   52.29    4.00
   1 -10  -1   15.60    2.20
  -1  10   1    8.40    2.30
  -1  10   1   13.00    2.40
  -1  10   1   13.10    2.30
   0 -10  -1   12.90    2.20
   0  10   1   14.30    2.40
   0  10   1   16.50    2.90
  -1 -10  -1   23.90    3.10
   1  10   1   23.80    3.30
   1  10   1   21.20    2.80
  -2 -10  -1   47.40    3.60
   2  10   1   48.80    4.10
   2  10   1   53.79    4.50
  -3 -10  -1   20.40    3.20
   3  10   1   15.10    2.90
   3  10   1   19.30    3.20
  -4 -10  -1    7.40    2.50
   4  10   1    1.90    2.60
   4  10   1    1.60    2.20
  -5 -10  -1    9.70    3.10
   5  10   1    8.50    2.60
   5  10   1   11.70    3.40
  -6 -10  -1   15.30    3.50
   6  10   1   10.90    3.50
  -7 -10  -1    3.90    2.90
   7  10   1    6.20    3.60
 -17  11   1    2.10    2.50
 -17  11   1   -2.80    2.30
 -17  11   1    5.30    4.80
 -16  11   1   13.00    5.00
 -16  11   1   11.40    2.60
 -16  11   1    8.30    2.70
 -15  11   1    8.20    2.60
 -15  11   1   13.00    2.60
 -15  11   1   17.70    4.80
 -14  11   1    6.90    2.40
 -14  11   1    5.30    2.20
 -14  11   1    6.90    2.10
 -14  11   1    6.30    4.00
 -13  11   1    2.40    2.00
 -13  11   1    0.30    1.90
 -13  11   1    3.70    1.80
 -13  11   1    2.00    3.50
 -12  11   1   -1.70    3.40
 -12  11   1    1.50    1.50
 -12  11   1    0.80    1.80
 -12  11   1   -1.00    1.70
 -11  11   1    1.60    1.70
 -11  11   1    0.90    1.30
 -11  11   1    3.00    3.00
 -10  11   1   33.80    3.80
 -10  11   1   33.00    2.80
 -10  11   1   34.10    4.20
 -10  11   1   31.50    2.90
 -10  11   1   37.30    2.30
  -9  11   1   -0.40    2.10
  -9  11   1   -1.70    1.30
  -9  11   1    0.60    1.00
  -9  11   1   -0.80    1.40
  -9  11   1    3.60    2.90
  -9  11   1    0.40    1.10
  -8  11   1    7.60    1.10
  -8  11   1    5.40    2.30
  -8  11   1    4.40    1.70
  -8  11   1    5.60    1.70
  -8  11   1    9.00    3.20
  -7  11   1    5.40    2.80
  -7  11   1    7.50    1.00
  -7  11   1    4.60    1.60
  -7  11   1    4.60    1.70
  -7  11   1    4.20    2.20
  -6  11   1   36.20    3.70
  -6  11   1   31.80    2.90
  -6  11   1   27.70    3.30
  -6  11   1   29.10    2.90
  -5  11   1    0.90    1.50
  -5  11   1    1.10    2.00
  -5  11   1    3.80    2.50
  -5  11   1    1.10    1.50
  -4  11   1    7.80    2.60
  -4  11   1    3.40    2.10
  -4  11   1    9.60    2.00
   3 -11  -1    2.70    1.60
  -3  11   1    2.90    2.10
  -3  11   1    2.00    2.20
  -3  11   1    1.10    1.70
   2 -11  -1   19.00    2.40
  -2  11   1   18.80    3.00
  -2  11   1   16.70    2.90
  -2  11   1   15.80    2.40
   1 -11  -1    5.30    1.80
  -1  11   1    7.50    2.10
  -1  11   1    4.50    2.10
  -1  11   1    5.60    2.40
   0 -11  -1   32.10    3.40
   0  11   1   35.00    3.70
   0  11   1   29.90    3.50
  -1 -11  -1   -0.20    2.30
   1  11   1    1.00    2.10
   1  11   1    3.70    2.40
  -2 -11  -1    4.80    2.30
   2  11   1    4.40    2.30
   2  11   1    7.20    3.00
  -3 -11  -1    5.30    2.70
   3  11   1    3.90    2.80
   3  11   1    4.40    2.50
  -4 -11  -1    4.50    2.60
   4  11   1    4.70    2.70
   4  11   1    8.20    3.10
  -5 -11  -1    4.20    3.00
   5  11   1    1.90    3.20
  -6 -11  -1    4.70    3.30
   6  11   1    5.40    3.30
 -17  12   1    4.60    2.60
 -17  12   1   16.70    3.10
 -17  12   1   18.90    5.70
 -16  12   1    9.70    4.90
 -16  12   1    0.80    2.40
 -16  12   1    5.10    2.40
 -16  12   1    1.10    2.40
 -15  12   1    2.50    2.30
 -15  12   1   12.00    5.00
 -15  12   1    3.60    2.10
 -15  12   1    3.10    2.30
 -14  12   1    9.90    2.50
 -14  12   1   21.40    5.50
 -14  12   1   11.00    2.50
 -14  12   1   14.70    2.30
 -13  12   1   11.00    2.10
 -13  12   1    8.80    4.10
 -13  12   1    8.50    2.30
 -13  12   1   12.50    2.40
 -12  12   1   50.09    2.90
 -12  12   1   59.29    5.40
 -12  12   1   60.19    4.90
 -12  12   1   50.19    3.80
 -11  12   1    3.10    1.80
 -11  12   1    1.70    2.50
 -11  12   1    8.50    3.90
 -10  12   1   16.60    2.40
 -10  12   1   14.60    3.10
 -10  12   1   27.50    4.70
  -9  12   1   20.20    4.10
  -9  12   1   22.60    3.40
  -9  12   1   15.50    2.30
  -8  12   1    1.20    2.90
  -8  12   1    3.10    2.60
  -8  12   1    3.50    1.70
  -7  12   1   19.10    3.70
  -7  12   1   14.60    2.90
  -7  12   1   14.20    2.20
  -6  12   1    1.30    1.60
  -6  12   1   -3.40    2.20
  -6  12   1    6.10    3.00
  -5  12   1    1.10    2.20
  -5  12   1    5.40    2.60
  -5  12   1   -2.20    1.60
  -4  12   1   31.60    3.60
  -4  12   1   30.30    3.60
  -4  12   1   31.10    3.20
   3 -12  -1   -0.90    1.60
  -3  12   1   -0.50    2.20
  -3  12   1   -1.90    1.80
  -3  12   1    0.70    2.30
   2 -12  -1    1.20    1.70
  -2  12   1    0.20    2.30
  -2  12   1   -0.40    2.10
   1 -12  -1    2.80    2.10
  -1  12   1    2.90    2.70
  -1  12   1    1.10    2.00
   0 -12  -1   12.80    2.90
   0  12   1   13.90    2.80
   0  12   1    9.20    2.90
  -1 -12  -1    4.90    2.40
   1  12   1    7.00    2.70
   1  12   1    9.20    2.90
  -2 -12  -1   -0.70    2.60
   2  12   1    3.10    2.80
   2  12   1    4.30    2.40
  -3 -12  -1    3.70    3.00
   3  12   1    4.10    2.70
   3  12   1    3.20    3.20
  -4 -12  -1   -3.20    2.60
   4  12   1    3.20    3.00
   4  12   1    0.70    2.30
  -5 -12  -1   -4.10    3.00
   5  12   1   -1.60    2.90
 -16  13   1    7.10    2.60
 -16  13   1   10.00    2.70
 -16  13   1   19.20    5.30
 -15  13   1    0.80    2.00
 -15  13   1    1.50    2.20
 -15  13   1    6.90    4.30
 -14  13   1   17.80    2.70
 -14  13   1   21.90    5.40
 -13  13   1   14.20    4.60
 -13  13   1    8.90    2.30
 -13  13   1    2.50    2.90
 -12  13   1    3.40    3.20
 -12  13   1    2.60    4.00
 -12  13   1    1.30    1.80
 -11  13   1   -0.10    3.50
 -11  13   1    0.70    2.90
 -11  13   1    0.70    1.70
 -10  13   1    3.10    2.70
 -10  13   1    2.70    1.70
 -10  13   1    8.80    3.80
  -9  13   1    3.80    2.60
  -9  13   1    1.00    1.70
  -9  13   1    2.30    3.30
  -8  13   1   80.09    5.60
  -8  13   1   68.19    4.20
  -8  13   1   70.99    5.10
  -7  13   1  163.08    6.40
  -7  13   1  172.78    8.00
  -7  13   1  175.18    7.90
  -6  13   1    0.00    2.40
  -6  13   1   -0.10    1.80
  -6  13   1    1.10    2.80
  -5  13   1    4.50    2.90
  -5  13   1   11.60    2.40
  -5  13   1    3.60    2.90
  -4  13   1   -2.30    2.50
  -4  13   1    0.80    2.00
   3 -13  -1    4.30    2.10
  -3  13   1    3.30    2.60
  -3  13   1    3.20    2.20
   2 -13  -1    8.30    2.30
  -2  13   1    6.90    2.90
  -2  13   1   10.20    2.60
   1 -13  -1   28.20    3.80
  -1  13   1   38.70    3.90
  -1  13   1   28.80    4.00
   0 -13  -1    2.70    2.30
   0  13   1    3.60    2.70
   0  13   1    3.00    2.50
  -1 -13  -1    1.60    2.50
   1  13   1    2.00    2.60
   1  13   1   -2.60    2.40
  -2 -13  -1   -0.30    2.90
   2  13   1    0.90    2.40
   2  13   1   -2.00    2.90
  -3 -13  -1    5.20    3.20
   3  13   1    5.00    2.90
   3  13   1    4.70    3.10
 -16  14   1    1.90    2.20
 -16  14   1    9.90    5.10
 -15  14   1    5.40    3.60
 -15  14   1    7.50    2.20
 -15  14   1   15.40    5.50
 -14  14   1   14.50    5.10
 -14  14   1    6.10    2.20
 -14  14   1    2.80    3.20
 -13  14   1   -2.00    2.60
 -13  14   1    5.70    2.10
 -13  14   1    6.90    4.40
 -12  14   1   13.20    3.50
 -12  14   1    8.10    4.30
 -12  14   1    5.70    2.10
 -11  14   1   15.00    4.20
 -11  14   1    6.80    3.00
 -11  14   1    6.20    2.10
 -10  14   1   22.70    3.10
 -10  14   1   22.60    3.80
 -10  14   1   20.60    4.60
  -9  14   1   10.90    3.20
  -9  14   1   13.70    4.00
  -9  14   1    8.50    2.10
  -8  14   1   37.70    4.50
  -8  14   1   41.70    5.10
  -8  14   1   36.70    3.50
  -7  14   1   12.20    3.20
  -7  14   1   17.70    4.10
  -7  14   1    8.70    2.30
  -6  14   1    2.90    2.70
  -6  14   1    6.40    2.30
  -5  14   1    2.40    3.00
  -5  14   1    3.20    2.20
  -4  14   1    7.40    2.50
  -4  14   1    7.10    2.90
   3 -14  -1   30.10    3.60
  -3  14   1   28.50    4.20
  -3  14   1   32.30    3.70
   2 -14  -1    5.40    2.50
  -2  14   1    3.50    2.50
  -2  14   1    3.10    2.70
   1 -14  -1   -0.20    2.10
  -1  14   1    0.10    2.90
  -1  14   1    4.50    2.70
   0 -14  -1    3.80    2.90
   0  14   1    5.40    2.70
   0  14   1    7.20    3.00
  -1 -14  -1    3.90    3.00
   1  14   1    0.60    2.60
   1  14   1   -4.10    2.60
  -2 -14  -1    9.70    3.60
   2  14   1    0.90    2.50
   2  14   1    3.10    3.00
 -15  15   1   13.60    3.90
 -15  15   1   14.00    2.60
 -15  15   1   22.30    5.70
 -14  15   1    5.80    2.10
 -14  15   1   10.10    4.90
 -14  15   1    5.00    3.40
 -13  15   1   13.80    4.80
 -13  15   1    7.20    3.90
 -13  15   1    9.40    2.30
 -12  15   1    6.80    4.20
 -12  15   1   -2.50    2.90
 -12  15   1    3.50    1.90
 -11  15   1    5.50    4.10
 -11  15   1    3.50    3.00
 -11  15   1    2.50    1.90
 -10  15   1    0.80    1.90
 -10  15   1    1.00    2.90
 -10  15   1    5.80    3.70
  -9  15   1    8.10    2.20
  -9  15   1    4.80    3.20
  -9  15   1    9.30    3.90
  -8  15   1   19.70    4.10
  -8  15   1   21.60    3.20
  -7  15   1   13.50    2.60
  -7  15   1   11.30    3.60
  -6  15   1    3.90    2.90
  -6  15   1    1.40    2.10
  -5  15   1   10.20    2.60
  -5  15   1    4.20    2.90
  -4  15   1    0.30    2.70
  -4  15   1    1.90    2.30
   3 -15  -1   -0.50    2.20
  -3  15   1    0.90    2.30
  -3  15   1   -0.10    2.70
   2 -15  -1    0.50    2.40
  -2  15   1    1.50    2.30
  -2  15   1    1.10    3.10
   1 -15  -1    3.80    2.70
  -1  15   1    1.30    2.90
  -1  15   1    2.40    2.50
   0 -15  -1    1.80    2.60
   0  15   1    4.80    3.50
   0  15   1    4.20    2.80
 -14  16   1    5.80    2.00
 -13  16   1    4.90    3.50
 -13  16   1    6.00    2.00
 -13  16   1   15.60    5.00
 -12  16   1    0.30    3.10
 -12  16   1    4.00    2.10
 -12  16   1   12.00    4.30
 -11  16   1    1.40    3.20
 -11  16   1   15.70    4.60
 -11  16   1    7.00    2.10
 -10  16   1   10.40    2.40
 -10  16   1    9.10    3.40
  -9  16   1   -0.30    2.00
  -9  16   1    3.80    3.10
  -8  16   1   -1.40    2.90
  -8  16   1    3.80    2.10
  -7  16   1   -0.80    2.70
  -7  16   1    5.70    2.40
  -6  16   1    2.80    2.30
  -6  16   1   -4.80    2.50
  -5  16   1   -0.40    2.90
  -5  16   1   -1.60    2.10
  -4  16   1    0.90    2.30
  -4  16   1   -0.90    2.80
  -3  16   1    7.10    2.80
  -3  16   1    0.80    3.00
   2 -16  -1    3.90    2.80
  -2  16   1   -1.30    2.60
  -2  16   1    2.60    3.30
 -11  17   1    1.00    1.90
 -11  17   1   -1.30    3.10
 -10  17   1   -2.20    2.90
 -10  17   1    3.20    2.20
  -9  17   1    8.10    2.40
  -9  17   1   11.80    4.10
  -8  17   1    2.00    3.10
  -8  17   1    4.60    2.30
  -7  17   1    7.80    2.50
  -7  17   1    5.90    3.40
  -6  17   1    6.70    2.50
  -6  17   1    0.60    3.60
  -5  17   1    4.50    3.50
  -5  17   1    2.70    2.40
  -4  17  -2    0.40    2.20
  -4  17  -2    2.10    3.40
  -5  17  -2    4.90    3.50
  -5  17  -2   -0.40    2.20
  -6  17  -2   -0.80    3.00
  -6  17  -2    2.00    2.10
  -7  17  -2    3.40    2.10
  -7  17  -2    0.20    2.90
  -8  17  -2    1.50    3.30
  -8  17  -2    2.90    1.90
  -9  17  -2   -4.60    2.70
  -9  17  -2    1.60    1.80
 -10  17  -2   12.90    2.20
 -10  17  -2   14.60    3.80
 -11  17  -2    1.50    3.10
 -11  17  -2    2.50    1.70
 -12  17  -2    0.80    1.60
 -12  17  -2    2.00    3.20
  -1  16  -2   -1.10    2.90
  -1  16  -2    1.20    2.50
  -2  16  -2    5.30    2.50
  -2  16  -2   13.60    3.80
  -3  16  -2    7.20    2.40
  -3  16  -2   10.00    3.60
  -4  16  -2   37.90    5.10
  -4  16  -2   30.90    3.50
  -5  16  -2    9.00    2.40
  -5  16  -2    7.30    3.10
  -6  16  -2    2.00    1.90
  -6  16  -2    4.20    2.90
  -7  16  -2   22.30    3.90
  -7  16  -2   22.90    3.00
  -8  16  -2   17.30    2.50
  -8  16  -2   13.40    3.80
  -9  16  -2    6.00    1.90
  -9  16  -2    6.20    3.10
 -10  16  -2   -0.80    3.00
 -10  16  -2    4.70    1.80
 -11  16  -2   -1.50    2.90
 -11  16  -2    2.30    1.70
 -12  16  -2   -0.60    3.00
 -12  16  -2    6.40    3.90
 -12  16  -2    0.70    1.50
 -13  16  -2    1.00    3.00
 -13  16  -2   10.90    4.30
 -13  16  -2    2.10    1.60
 -14  16  -2    8.70    3.90
 -14  16  -2   18.60    4.90
 -14  16  -2    5.70    1.70
   1  15  -2    1.80    2.60
   1  15  -2   -1.40    2.80
  -1 -15   2    3.10    3.10
   0  15  -2    4.90    3.40
   0  15  -2   -3.70    2.30
   0 -15   2    2.20    2.90
  -1  15  -2    4.90    2.70
  -1  15  -2   -1.60    3.00
   1 -15   2    5.60    3.00
  -2  15  -2    1.80    2.80
  -2  15  -2    7.80    2.50
  -3  15  -2   -0.30    2.10
  -3  15  -2   -3.10    2.60
  -4  15  -2    8.10    2.40
  -4  15  -2   10.30    3.10
  -5  15  -2    5.40    2.90
  -5  15  -2   -0.40    1.90
  -6  15  -2   12.80    3.60
  -6  15  -2   10.30    2.30
  -7  15  -2    0.70    1.70
  -7  15  -2   -2.90    2.50
  -8  15  -2    0.20    1.60
  -8  15  -2    3.50    2.80
  -9  15  -2   20.70    4.40
  -9  15  -2   15.20    3.60
  -9  15  -2   20.80    2.70
 -10  15  -2    7.00    3.50
 -10  15  -2    0.70    1.60
 -10  15  -2    0.70    2.80
 -11  15  -2    0.50    1.50
 -11  15  -2    7.90    3.60
 -11  15  -2    2.80    3.30
 -12  15  -2    1.10    3.20
 -12  15  -2    5.20    3.70
 -12  15  -2    1.00    1.50
 -13  15  -2    9.80    4.20
 -13  15  -2   -0.80    2.80
 -13  15  -2    2.40    1.50
 -14  15  -2    6.70    4.50
 -14  15  -2   -0.10    3.10
 -14  15  -2    0.10    1.40
 -15  15  -2    3.00    3.30
 -15  15  -2    5.10    1.70
 -15  15  -2   11.20    4.70
   3  14  -2    1.80    3.20
   3  14  -2   -1.20    2.70
  -3 -14   2    3.00    3.00
   2  14  -2    3.60    3.10
   2  14  -2    2.90    2.70
  -2 -14   2    4.40    3.20
   1  14  -2    1.50    2.90
   1  14  -2    0.20    2.50
  -1 -14   2   -1.20    2.40
   0  14  -2    1.00    3.10
   0  14  -2    4.90    2.50
   0 -14   2    7.60    2.70
  -1  14  -2   10.20    3.10
  -1  14  -2   13.00    2.60
   1 -14   2   11.30    2.70
  -2  14  -2   -0.20    2.00
  -2  14  -2    3.70    3.00
  -3  14  -2    3.10    2.60
  -3  14  -2   -0.20    2.00
  -4  14  -2    0.40    2.50
  -4  14  -2    0.10    1.80
  -5  14  -2   26.40    2.90
  -5  14  -2   25.00    3.70
  -6  14  -2    8.70    2.00
  -6  14  -2    5.50    3.00
  -7  14  -2   22.80    3.80
  -7  14  -2   20.30    3.50
  -7  14  -2   19.00    2.70
  -8  14  -2    1.00    2.80
  -8  14  -2    0.10    1.60
  -8  14  -2    3.20    2.90
  -9  14  -2   18.70    3.70
  -9  14  -2   17.80    2.60
  -9  14  -2   18.00    3.80
 -10  14  -2    1.50    2.80
 -10  14  -2    1.10    1.50
 -10  14  -2    2.40    3.20
 -11  14  -2    6.70    3.60
 -11  14  -2    3.00    1.60
 -11  14  -2    0.80    3.00
 -12  14  -2    2.40    3.50
 -12  14  -2   -0.10    1.40
 -12  14  -2   -2.00    2.90
 -13  14  -2   28.10    5.10
 -13  14  -2    9.50    3.40
 -13  14  -2   11.50    2.00
 -14  14  -2    5.60    3.10
 -14  14  -2   17.90    4.80
 -14  14  -2    9.50    1.90
 -15  14  -2    1.80    3.10
 -15  14  -2    8.40    4.40
 -15  14  -2    2.00    1.70
 -16  14  -2    0.30    1.70
 -16  14  -2    9.40    4.40
   4  13  -2    9.60    3.40
   4  13  -2    2.90    2.70
  -4 -13   2    3.50    3.40
   3  13  -2    8.90    2.70
   3  13  -2   12.50    3.50
  -3 -13   2   22.20    3.80
   2  13  -2   -1.60    2.70
   2  13  -2   -1.70    2.00
  -2 -13   2    2.20    2.60
   1  13  -2    2.80    2.80
   1  13  -2    2.40    2.30
  -1 -13   2    1.90    2.40
   0  13  -2    3.80    3.10
   0  13  -2    2.90    2.30
   0 -13   2    2.90    2.30
  -1  13  -2   17.80    2.70
  -1  13  -2   20.70    3.40
   1 -13   2   21.60    3.20
  -2  13  -2   18.50    3.30
  -2  13  -2   17.20    2.70
   2 -13   2   17.30    2.70
  -3  13  -2   29.80    3.90
  -3  13  -2   29.30    3.10
  -4  13  -2   26.30    3.70
  -4  13  -2   22.10    2.80
  -5  13  -2    3.00    1.80
  -5  13  -2    2.00    2.40
  -5  13  -2    6.80    2.50
  -6  13  -2    3.60    1.70
  -6  13  -2    2.00    2.40
  -6  13  -2    6.70    2.80
  -7  13  -2   89.89    5.40
  -7  13  -2   91.29    4.10
  -7  13  -2   97.19    5.60
  -8  13  -2  173.38    7.50
  -8  13  -2  171.98    5.90
  -8  13  -2  177.28    7.60
  -9  13  -2   14.70    2.00
  -9  13  -2   10.30    3.20
  -9  13  -2   19.70    3.80
 -10  13  -2    5.90    3.20
 -10  13  -2    2.60    2.80
 -10  13  -2    0.30    1.40
 -11  13  -2   24.10    3.90
 -11  13  -2   23.90    2.60
 -11  13  -2   34.90    4.60
 -12  13  -2    0.40    3.30
 -12  13  -2   -2.30    2.50
 -12  13  -2   -1.60    1.40
 -13  13  -2   -0.60    2.90
 -13  13  -2    8.00    4.20
 -13  13  -2    4.30    1.70
 -14  13  -2    3.70    2.90
 -14  13  -2   13.20    4.20
 -14  13  -2    5.60    1.90
 -15  13  -2    2.80    1.80
 -15  13  -2    7.90    4.20
 -15  13  -2   -1.40    2.20
 -16  13  -2    3.30    2.00
 -16  13  -2    2.70    2.40
 -16  13  -2    2.40    2.00
 -16  13  -2   11.40    5.10
   5  12  -2    6.20    3.50
   5  12  -2   -0.70    2.40
  -5 -12   2    1.20    3.10
   4  12  -2    3.10    2.90
   4  12  -2    1.60    2.30
  -4 -12   2    1.50    2.70
   3  12  -2    3.80    2.90
   3  12  -2    2.30    2.40
  -3 -12   2    6.50    2.80
   2  12  -2   14.20    2.90
   2  12  -2   18.90    3.70
  -2 -12   2   17.30    3.30
   1  12  -2    1.10    2.10
   1  12  -2   -2.20    2.20
  -1 -12   2    1.70    2.50
   0  12  -2   79.29    5.50
   0  12  -2   77.59    4.50
   0 -12   2   96.39    5.10
  -1  12  -2  100.59    4.80
  -1  12  -2   97.49    5.50
   1 -12   2  107.69    5.30
  -2  12  -2   29.50    3.60
  -2  12  -2   25.70    2.90
   2 -12   2   25.10    2.90
  -3  12  -2    9.90    2.10
  -3  12  -2   12.40    2.80
  -4  12  -2    9.40    2.60
  -4  12  -2    9.50    1.90
  -4  12  -2   12.50    2.50
  -5  12  -2    9.40    2.70
  -5  12  -2    9.10    2.60
  -5  12  -2    6.70    1.70
  -6  12  -2   52.09    4.20
  -6  12  -2   50.09    3.40
  -6  12  -2   48.00    3.00
  -6  12  -2   57.69    4.50
  -7  12  -2   13.60    2.10
  -7  12  -2   18.30    3.30
  -7  12  -2   14.60    2.90
  -7  12  -2   13.20    1.90
  -8  12  -2   -2.70    2.30
  -8  12  -2    3.40    2.70
  -8  12  -2    1.40    0.90
  -8  12  -2    5.30    1.60
  -8  12  -2    5.20    1.50
  -9  12  -2    0.30    1.10
  -9  12  -2   -1.00    1.20
  -9  12  -2    0.70    2.30
  -9  12  -2    1.00    1.30
  -9  12  -2    2.60    1.40
  -9  12  -2    2.40    3.00
 -10  12  -2   14.60    3.10
 -10  12  -2   11.40    1.80
 -10  12  -2   16.20    3.70
 -10  12  -2   13.30    1.80
 -10  12  -2   11.40    1.60
 -11  12  -2    5.60    3.40
 -11  12  -2    4.50    1.40
 -11  12  -2    1.30    1.40
 -11  12  -2    8.40    2.90
 -11  12  -2    3.40    1.50
 -12  12  -2    5.10    1.70
 -12  12  -2    5.50    1.60
 -12  12  -2    6.80    1.70
 -12  12  -2   13.50    4.20
 -12  12  -2    9.10    3.10
 -13  12  -2    0.60    1.70
 -13  12  -2    5.20    3.50
 -13  12  -2    3.50    1.70
 -14  12  -2    2.20    3.50
 -14  12  -2   -0.10    1.70
 -14  12  -2    0.10    1.70
 -14  12  -2   -1.20    1.70
 -15  12  -2    3.30    2.10
 -15  12  -2    0.80    1.90
 -15  12  -2    1.80    1.90
 -15  12  -2   13.80    4.90
 -16  12  -2    1.30    2.20
 -16  12  -2    3.50    2.10
 -16  12  -2   14.80    5.00
 -17  12  -2    1.60    2.20
 -17  12  -2   15.00    5.10
 -17  12  -2    3.90    2.40
   7  11  -2   -6.10    2.80
  -7 -11   2   -1.00    2.90
   6  11  -2    3.00    3.20
  -6 -11   2    0.50    2.80
   5  11  -2   11.70    2.80
   5  11  -2   16.20    3.50
  -5 -11   2    9.90    3.10
   4  11  -2   -0.70    2.60
   4  11  -2   -2.30    2.20
  -4 -11   2   -0.70    2.50
   3  11  -2   -0.50    2.20
   3  11  -2   -0.60    2.50
  -3 -11   2    3.80    2.50
   2  11  -2    2.30    2.50
   2  11  -2   -1.10    1.90
  -2 -11   2    3.00    2.50
   1  11  -2   20.20    2.90
   1  11  -2   14.30    3.00
  -1 -11   2   20.90    3.10
   0  11  -2   27.60    3.10
   0  11  -2   24.80    3.40
   0 -11   2   27.30    3.40
  -1  11  -2   64.49    3.70
  -1  11  -2   59.89    4.20
   1 -11   2   63.89    4.00
  -2  11  -2   39.80    3.50
  -2  11  -2   35.10    2.70
  -2  11  -2   37.60    3.00
   2 -11   2   37.90    3.00
  -3  11  -2    1.70    1.50
  -3  11  -2    1.40    1.90
  -3  11  -2    2.90    1.80
  -3  11  -2    1.70    1.40
  -4  11  -2   -2.30    1.10
  -4  11  -2    2.70    2.20
  -4  11  -2    0.40    1.80
  -4  11  -2    1.00    1.30
  -5  11  -2    0.90    1.10
  -5  11  -2    1.80    2.20
  -5  11  -2    0.80    1.90
  -5  11  -2    0.70    0.50
  -5  11  -2    1.80    1.30
  -6  11  -2   47.50    4.00
  -6  11  -2   49.10    3.00
  -6  11  -2   44.40    2.70
  -6  11  -2   51.39    3.80
  -6  11  -2   44.10    1.70
  -7  11  -2   42.30    1.80
  -7  11  -2   45.20    3.70
  -7  11  -2   39.40    2.80
  -7  11  -2   38.10    2.50
  -7  11  -2   42.40    3.60
  -8  11  -2   31.70    1.80
  -8  11  -2   34.30    2.60
  -8  11  -2   38.20    3.90
  -8  11  -2   36.70    3.70
  -8  11  -2   34.60    2.40
  -9  11  -2   10.50    1.40
  -9  11  -2    9.40    1.60
  -9  11  -2    8.30    1.50
  -9  11  -2   10.90    2.70
  -9  11  -2   13.10    3.10
  -9  11  -2   13.60    1.80
 -10  11  -2    1.10    1.20
 -10  11  -2    3.60    1.30
 -10  11  -2    3.20    1.40
 -10  11  -2    3.50    2.60
 -10  11  -2    1.40    1.30
 -10  11  -2    0.40    2.10
 -11  11  -2    0.60    1.30
 -11  11  -2    4.10    3.20
 -11  11  -2   -0.80    1.10
 -11  11  -2    0.70    1.40
 -12  11  -2    6.40    3.20
 -12  11  -2    7.30    1.90
 -12  11  -2    5.70    1.70
 -12  11  -2    5.90    1.40
 -12  11  -2    3.00    1.60
 -13  11  -2   21.00    2.90
 -13  11  -2   20.90    4.30
 -13  11  -2   22.40    2.70
 -13  11  -2   30.00    3.10
 -14  11  -2   63.79    6.00
 -14  11  -2   52.09    3.80
 -14  11  -2   50.89    3.50
 -15  11  -2   25.90    4.80
 -15  11  -2   15.50    2.60
 -15  11  -2   16.30    2.70
 -16  11  -2    0.20    2.00
 -16  11  -2    6.70    4.30
 -16  11  -2    1.60    2.40
 -17  11  -2    6.90    4.70
 -17  11  -2   -2.30    2.10
 -17  11  -2    4.50    2.70
   8  10  -2    3.70    3.80
  -8 -10   2   14.20    3.50
   7  10  -2    0.10    3.00
  -7 -10   2    1.20    2.70
   6  10  -2    1.30    2.50
   6  10  -2    2.20    2.90
  -6 -10   2    1.30    2.60
   5  10  -2   28.70    3.50
  -5 -10   2   43.70    4.60
   4  10  -2   74.49    4.50
   4  10  -2   82.09    5.20
  -4 -10   2   83.09    4.90
   3  10  -2  124.09    6.30
   3  10  -2  121.99    5.60
  -3 -10   2  127.99    5.30
  -3 -10   2  125.29    5.90
   2  10  -2   57.79    4.30
   2  10  -2   61.19    3.70
  -2 -10   2   67.59    3.30
  -2 -10   2   66.99    4.10
   1  10  -2    9.00    2.00
   1  10  -2   10.80    2.50
  -1 -10   2    7.90    1.50
  -1 -10   2   10.60    2.30
   0  10  -2    0.70    1.90
   0  10  -2    0.60    1.50
   0 -10   2    3.00    1.10
   0 -10   2    1.30    1.60
  -1  10  -2   12.00    2.60
  -1  10  -2   10.70    1.80
  -1  10  -2   11.50    1.80
  -1  10  -2   11.00    1.00
  -1  10  -2   11.60    1.90
   1 -10   2   12.80    2.10
  -2  10  -2   -0.10    1.70
  -2  10  -2   -1.00    1.10
  -2  10  -2    0.30    0.50
  -2  10  -2    1.70    1.50
  -2  10  -2    2.00    1.40
   2 -10   2    0.50    1.50
   2 -10   2   -0.90    0.90
   2 -10   2    1.60    1.00
  -3  10  -2   48.50    3.00
  -3  10  -2   52.49    2.80
  -3  10  -2   52.89    3.00
  -3  10  -2   46.40    1.50
  -3  10  -2   48.80    3.50
   3 -10   2   46.40    2.30
  -4  10  -2   35.70    2.40
  -4  10  -2   35.30    3.00
  -4  10  -2   34.70    2.60
  -4  10  -2   32.60    3.10
  -4  10  -2   34.90    1.40
  -4  10  -2   33.00    1.20
   4 -10   2   32.40    1.90
  -5  10  -2   11.50    1.70
  -5  10  -2   12.80    1.80
  -5  10  -2   13.30    0.90
  -5  10  -2   13.60    2.30
  -5  10  -2   14.80    1.40
  -5  10  -2   13.00    2.50
  -6  10  -2   63.59    3.00
  -6  10  -2   64.89    2.20
  -6  10  -2   70.29    3.20
  -6  10  -2   63.79    4.00
  -6  10  -2   66.59    3.90
  -7  10  -2   35.40    2.40
  -7  10  -2   36.40    1.70
  -7  10  -2   40.20    3.40
  -7  10  -2   34.90    2.30
  -7  10  -2   40.20    3.40
  -8  10  -2    8.70    1.20
  -8  10  -2    9.20    1.40
  -8  10  -2   11.90    2.80
  -8  10  -2    7.90    1.40
  -8  10  -2    9.40    2.30
  -8  10  -2    9.30    1.40
  -9  10  -2    5.10    1.40
  -9  10  -2   11.30    2.60
  -9  10  -2    5.60    1.30
  -9  10  -2    9.90    2.80
  -9  10  -2    8.20    1.40
  -9  10  -2    6.60    1.30
 -10  10  -2   29.20    2.10
 -10  10  -2   31.50    2.10
 -10  10  -2   31.50    2.10
 -10  10  -2   31.50    2.50
 -10  10  -2   24.40    3.80
 -10  10  -2   33.30    2.50
 -11  10  -2   30.70    2.20
 -11  10  -2   33.70    3.90
 -11  10  -2   28.60    2.60
 -11  10  -2   31.10    2.70
 -11  10  -2   27.40    2.10
 -11  10  -2   31.70    2.50
 -12  10  -2   45.00    3.00
 -12  10  -2   46.40    3.20
 -12  10  -2   42.60    2.90
 -12  10  -2   50.49    5.00
 -12  10  -2   43.70    2.50
 -13  10  -2    1.30    1.70
 -13  10  -2   -0.10    3.20
 -13  10  -2    1.00    1.90
 -14  10  -2    4.30    3.60
 -14  10  -2    5.90    2.20
 -14  10  -2    2.80    2.00
 -15  10  -2    0.80    2.00
 -15  10  -2   -0.70    2.30
 -15  10  -2   11.70    4.10
 -16  10  -2    9.10    2.50
 -16  10  -2   24.70    5.50
 -16  10  -2    9.20    2.90
 -17  10  -2    7.70    2.70
 -17  10  -2   14.40    4.70
 -17  10  -2   13.60    2.90
   9   9  -2   -2.80    3.60
  -9  -9   2    0.10    2.80
   8   9  -2    7.60    3.40
  -8  -9   2    6.40    2.90
   7   9  -2    6.70    3.20
  -7  -9   2    7.20    2.50
  -7  -9   2    4.20    3.00
   6   9  -2   11.10    3.10
   6   9  -2    5.60    2.30
  -6  -9   2    2.40    2.10
  -6  -9   2    4.50    2.80
   5   9  -2   44.80    4.20
   5   9  -2   46.40    4.10
  -5  -9   2   52.79    4.10
  -5  -9   2   47.10    3.50
   4   9  -2   65.79    4.50
   4   9  -2   66.59    4.30
  -4  -9   2   59.39    4.10
  -4  -9   2   64.49    3.60
   3   9  -2   15.20    2.50
   3   9  -2   16.70    2.80
  -3  -9   2   15.40    2.60
  -3  -9   2   19.80    2.30
   2   9  -2    2.00    1.60
   2   9  -2    0.70    2.00
  -2  -9   2   -0.10    1.30
  -2  -9   2   -0.30    1.70
  -2  -9   2    0.40    1.50
   1   9  -2    2.10    1.30
   1   9  -2    2.80    2.00
   1   9  -2   -0.20    1.30
  -1  -9   2   -1.40    1.60
  -1  -9   2    1.00    1.20
  -1  -9   2    0.60    1.20
   0   9  -2   47.60    3.50
   0   9  -2   54.49    3.10
   0   9  -2   51.19    1.90
   0   9  -2   56.89    3.20
   0  -9   2   47.70    3.20
   0  -9   2   54.99    2.40
   0  -9   2   54.39    2.20
   0  -9   2   53.29    2.70
  -1   9  -2   11.40    1.70
  -1   9  -2   10.90    2.10
  -1   9  -2   12.70    1.70
  -1   9  -2   11.70    1.70
  -1   9  -2   11.70    0.90
   1  -9   2   16.40    2.10
   1  -9   2   10.10    1.50
   1  -9   2   13.90    1.30
  -2   9  -2   30.10    2.30
  -2   9  -2   33.80    2.40
  -2   9  -2   30.70    1.20
  -2   9  -2   27.10    3.00
  -2   9  -2   32.40    2.40
   2  -9   2   33.30    2.70
   2  -9   2   33.10    1.90
   2  -9   2   35.00    1.80
  -3   9  -2   20.80    2.00
  -3   9  -2   18.50    2.60
  -3   9  -2   18.50    2.10
  -3   9  -2   22.20    2.30
  -3   9  -2   19.10    1.10
   3  -9   2   17.90    1.60
  -4   9  -2    0.40    1.10
  -4   9  -2    2.30    1.70
  -4   9  -2    0.90    0.50
  -4   9  -2    2.40    0.80
  -4   9  -2    1.00    1.60
  -4   9  -2    0.70    1.00
   4  -9   2    1.50    0.80
  -5   9  -2   -1.30    1.70
  -5   9  -2    2.40    1.10
  -5   9  -2    1.00    1.10
  -5   9  -2    1.50    0.60
  -5   9  -2   -1.00    1.70
  -6   9  -2   13.60    2.40
  -6   9  -2   14.70    2.40
  -6   9  -2   14.30    1.80
  -6   9  -2   13.00    1.70
  -6   9  -2   14.00    1.10
  -7   9  -2   37.20    3.20
  -7   9  -2   36.30    2.20
  -7   9  -2   36.60    2.20
  -7   9  -2   35.30    1.70
  -7   9  -2   37.90    3.10
  -8   9  -2   11.20    1.40
  -8   9  -2    9.50    1.40
  -8   9  -2   11.70    2.30
  -8   9  -2   11.90    1.60
  -8   9  -2   13.90    2.80
  -8   9  -2    9.10    1.30
  -9   9  -2    4.50    1.20
  -9   9  -2    3.90    1.10
  -9   9  -2    5.00    1.30
  -9   9  -2    3.90    1.30
  -9   9  -2    4.20    1.20
  -9   9  -2    5.40    2.50
 -10   9  -2   32.30    2.50
 -10   9  -2   30.40    3.80
 -10   9  -2   31.30    2.00
 -10   9  -2   30.60    2.00
 -10   9  -2   30.20    2.20
 -11   9  -2   62.39    4.90
 -11   9  -2   57.99    2.70
 -11   9  -2   56.59    2.70
 -11   9  -2   57.89    3.30
 -11   9  -2   59.29    2.70
 -11   9  -2   58.89    3.00
 -12   9  -2    6.30    1.80
 -12   9  -2    2.80    1.20
 -12   9  -2    3.60    1.30
 -12   9  -2    4.10    1.80
 -12   9  -2    7.80    3.10
 -13   9  -2  112.09    5.00
 -13   9  -2  110.29    6.70
 -13   9  -2  104.69    4.60
 -14   9  -2   75.49    4.30
 -14   9  -2   75.99    4.50
 -14   9  -2   87.49    6.00
 -15   9  -2    7.00    4.30
 -15   9  -2    4.50    2.50
 -15   9  -2    6.10    2.30
 -16   9  -2    9.70    2.70
 -16   9  -2   25.10    4.70
 -16   9  -2   18.10    3.30
 -17   9  -2   16.60    4.70
 -17   9  -2    8.20    2.70
 -17   9  -2    9.50    2.80
  10   8  -2   -4.30    3.80
 -10  -8   2    2.90    3.30
 -10  -8   2   10.40    3.10
   9   8  -2    2.80    3.20
  -9  -8   2    4.90    2.70
  -9  -8   2    1.80    3.00
   8   8  -2   11.20    3.30
  -8  -8   2   11.10    2.80
  -8  -8   2   10.30    3.00
   7   8  -2   54.69    4.70
   7   8  -2   73.19    6.10
  -7  -8   2   63.89    4.00
  -7  -8   2   48.20    4.10
   6   8  -2   86.79    5.20
   6   8  -2   85.79    4.90
  -6  -8   2   88.99    4.90
  -6  -8   2   92.59    4.40
   5   8  -2   -2.00    2.40
   5   8  -2    2.20    2.10
  -5  -8   2    4.30    2.00
  -5  -8   2    2.10    2.10
   4   8  -2    7.00    1.90
   4   8  -2   10.10    2.70
  -4  -8   2    9.20    1.90
  -4  -8   2    8.00    1.80
  -4  -8   2    8.90    1.50
  -4  -8   2    7.20    2.10
   3   8  -2   14.00    2.10
   3   8  -2    8.90    2.20
  -3  -8   2    6.80    1.60
  -3  -8   2    7.10    1.90
  -3  -8   2   12.00    1.80
   2   8  -2    2.70    1.60
   2   8  -2    1.00    1.20
   2   8  -2    1.00    1.60
  -2  -8   2    0.20    1.00
  -2  -8   2   -2.20    1.20
  -2  -8   2    0.60    1.20
  -2  -8   2    0.50    1.20
   1   8  -2    4.60    1.40
   1   8  -2    3.50    1.90
   1   8  -2    4.90    1.40
  -1  -8   2    6.60    1.30
  -1  -8   2    4.60    1.30
  -1  -8   2    6.30    1.10
  -1  -8   2    2.50    1.40
   0   8  -2    3.10    1.30
   0   8  -2    0.90    1.60
   0   8  -2    2.40    0.70
   0   8  -2    1.40    1.20
   0  -8   2    1.90    1.00
   0  -8   2    1.60    1.30
   0  -8   2    1.20    1.00
   0  -8   2    2.40    0.90
  -1   8  -2   27.10    2.10
  -1   8  -2   25.50    2.10
  -1   8  -2   27.50    2.00
  -1   8  -2   30.20    2.70
  -1   8  -2   28.30    1.30
   1  -8   2   24.20    2.40
   1  -8   2   28.90    1.60
   1  -8   2   29.00    1.80
  -2   8  -2   32.10    2.30
  -2   8  -2   30.20    2.10
  -2   8  -2   31.30    2.20
  -2   8  -2   30.20    1.30
  -2   8  -2   33.30    2.70
   2  -8   2   33.20    1.80
   2  -8   2   34.60    1.80
   2  -8   2   33.30    2.50
  -3   8  -2   40.50    2.40
  -3   8  -2   43.60    3.00
  -3   8  -2   44.60    1.70
  -3   8  -2   42.00    2.70
  -3   8  -2   41.50    2.20
   3  -8   2   45.50    2.10
   3  -8   2   43.40    1.90
  -4   8  -2    6.50    0.80
  -4   8  -2    8.20    1.30
  -4   8  -2    8.20    1.90
  -4   8  -2    8.60    1.30
  -4   8  -2    9.70    1.90
   4  -8   2    7.10    0.90
  -5   8  -2   30.20    2.00
  -5   8  -2   25.90    1.90
  -5   8  -2   25.30    2.60
  -5   8  -2   28.30    1.30
  -5   8  -2   28.30    2.70
  -6   8  -2    0.90    1.50
  -6   8  -2    5.20    1.10
  -6   8  -2    2.80    1.10
  -6   8  -2    5.60    1.90
  -6   8  -2    5.00    0.90
  -7   8  -2   27.80    1.80
  -7   8  -2   27.20    2.90
  -7   8  -2   28.60    1.90
  -7   8  -2   26.70    1.60
  -7   8  -2   25.70    1.90
  -8   8  -2    7.00    1.20
  -8   8  -2    6.70    1.30
  -8   8  -2    6.60    1.10
  -8   8  -2    7.20    1.30
  -8   8  -2    7.70    1.30
  -8   8  -2    6.30    2.40
  -9   8  -2   13.10    1.90
  -9   8  -2   12.60    1.60
  -9   8  -2   12.00    1.40
  -9   8  -2   12.00    1.50
  -9   8  -2   12.50    2.60
 -10   8  -2  133.99    6.00
 -10   8  -2  135.19    4.60
 -10   8  -2  140.49    4.30
 -10   8  -2  145.09    4.30
 -10   8  -2  140.49    4.40
 -10   8  -2  138.79    4.90
 -11   8  -2   15.50    3.40
 -11   8  -2   11.70    1.60
 -11   8  -2   12.00    1.70
 -11   8  -2   11.30    1.80
 -11   8  -2    9.40    1.80
 -11   8  -2   13.50    1.70
 -12   8  -2   42.70    3.20
 -12   8  -2   42.40    4.10
 -12   8  -2   44.00    2.50
 -12   8  -2   44.30    3.10
 -12   8  -2   41.70    2.40
 -13   8  -2   16.40    4.10
 -13   8  -2    9.40    1.60
 -13   8  -2    7.30    2.00
 -13   8  -2   13.60    2.50
 -14   8  -2    4.70    2.10
 -14   8  -2    9.20    3.60
 -14   8  -2    4.70    2.10
 -15   8  -2   20.40    3.20
 -15   8  -2   24.50    4.70
 -15   8  -2   17.00    2.80
 -16   8  -2   10.60    4.60
 -16   8  -2    6.90    2.60
 -16   8  -2    6.80    2.70
 -17   8  -2    4.40    3.00
 -17   8  -2   -4.70    2.10
 -17   8  -2    4.40    4.00
  11   7  -2    5.00    4.00
 -11  -7   2    9.10    3.20
 -11  -7   2    9.90    3.30
  10   7  -2   -5.70    3.40
 -10  -7   2    3.90    2.80
 -10  -7   2    2.30    2.70
   9   7  -2   -3.50    3.10
  -9  -7   2   -0.30    2.40
  -9  -7   2    4.40    2.50
   8   7  -2   59.99    4.80
  -8  -7   2   74.19    4.30
  -8  -7   2   68.59    4.80
   7   7  -2   37.70    4.00
   7   7  -2   36.80    3.50
  -7  -7   2   44.20    3.50
  -7  -7   2   42.10    3.60
   6   7  -2   14.40    2.40
   6   7  -2   16.00    2.90
  -6  -7   2   16.10    2.50
  -6  -7   2   10.80    2.10
  -6  -7   2   10.80    2.20
  -6  -7   2   10.30    2.40
   5   7  -2   42.80    3.40
   5   7  -2   41.00    3.80
  -5  -7   2   45.80    2.90
  -5  -7   2   42.20    3.20
  -5  -7   2   44.70    2.50
  -5  -7   2   47.40    3.20
   4   7  -2    0.60    1.40
   4   7  -2    1.60    1.80
  -4  -7   2    1.80    1.50
  -4  -7   2    3.90    1.50
  -4  -7   2    2.10    1.50
  -4  -7   2    1.50    1.10
   3   7  -2   36.80    2.50
   3   7  -2   30.40    2.50
   3   7  -2   33.00    2.90
  -3  -7   2   31.60    2.30
  -3  -7   2   36.20    2.30
  -3  -7   2   31.00    2.20
  -3  -7   2   35.70    2.60
   2   7  -2   14.30    2.10
   2   7  -2   13.30    1.90
   2   7  -2   17.10    1.80
  -2  -7   2   14.30    1.60
  -2  -7   2   13.70    1.70
  -2  -7   2   13.70    1.90
  -2  -7   2   14.10    1.70
   1   7  -2   55.19    2.70
   1   7  -2   55.19    3.30
   1   7  -2   55.29    2.90
  -1  -7   2   50.49    2.80
  -1  -7   2   53.29    2.40
  -1  -7   2   53.79    2.20
  -1  -7   2   53.99    2.60
   0   7  -2  258.27    7.90
   0   7  -2  252.57    7.30
   0   7  -2  259.27    7.30
   0   7  -2  264.77    6.40
   0  -7   2  254.47    6.60
   0  -7   2  253.97    8.30
   0  -7   2  252.37    6.70
   0  -7   2  263.47    7.40
  -1   7  -2   24.50    1.20
  -1   7  -2   23.30    1.90
  -1   7  -2   23.20    1.80
  -1   7  -2   17.30    2.30
  -1   7  -2   23.40    1.90
   1  -7   2   23.20    1.40
   1  -7   2   24.30    1.60
   1  -7   2   20.80    1.90
   1  -7   2   22.40    1.50
  -2   7  -2   35.50    2.70
  -2   7  -2   31.70    2.00
  -2   7  -2   33.10    2.20
  -2   7  -2   31.20    1.40
  -2   7  -2   35.20    2.00
   2  -7   2   31.40    2.10
   2  -7   2   33.70    1.70
   2  -7   2   33.80    1.70
  -3   7  -2   -0.40    0.90
  -3   7  -2    1.50    1.40
  -3   7  -2   -2.30    1.20
  -3   7  -2   -0.90    0.70
  -3   7  -2    0.60    0.90
   3  -7   2    0.60    0.70
   3  -7   2   -0.40    0.90
  -4   7  -2  597.94   14.60
  -4   7  -2  588.24   15.50
  -4   7  -2  607.84   14.70
  -4   7  -2  588.54   15.20
  -4   7  -2  602.54   14.10
   4  -7   2  620.64   14.20
  -5   7  -2   47.60    1.80
  -5   7  -2   47.60    2.20
  -5   7  -2   45.40    2.20
  -5   7  -2   43.90    2.90
  -5   7  -2   46.40    2.90
  -6   7  -2   77.29    3.70
  -6   7  -2   79.79    2.60
  -6   7  -2   76.09    3.00
  -6   7  -2   79.69    2.90
  -6   7  -2   78.69    2.80
  -7   7  -2   86.59    3.20
  -7   7  -2   88.09    3.00
  -7   7  -2   90.49    4.20
  -7   7  -2   90.19    3.00
  -7   7  -2   84.49    3.10
  -7   7  -2   86.69    3.20
  -8   7  -2   11.80    1.50
  -8   7  -2    9.00    1.40
  -8   7  -2    9.70    1.30
  -8   7  -2   10.60    2.50
  -8   7  -2    7.30    1.10
  -9   7  -2   47.00    2.20
  -9   7  -2   48.30    2.30
  -9   7  -2   44.70    2.60
  -9   7  -2   44.40    3.40
  -9   7  -2   48.80    2.50
  -9   7  -2   46.10    2.10
 -10   7  -2   -0.40    2.30
 -10   7  -2    1.40    1.00
 -10   7  -2    1.30    1.30
 -10   7  -2    2.80    1.00
 -10   7  -2    3.00    0.90
 -10   7  -2    3.10    1.30
 -11   7  -2    1.50    0.80
 -11   7  -2    0.30    1.00
 -11   7  -2    1.10    1.00
 -11   7  -2    2.30    2.50
 -11   7  -2    2.00    1.40
 -11   7  -2   -1.80    1.20
 -12   7  -2   16.40    3.40
 -12   7  -2   16.90    2.30
 -12   7  -2   19.10    2.10
 -12   7  -2   18.20    2.70
 -12   7  -2   18.40    2.00
 -13   7  -2    9.40    1.70
 -13   7  -2    7.40    2.30
 -13   7  -2   11.20    3.70
 -13   7  -2    6.40    2.10
 -14   7  -2    2.20    2.10
 -14   7  -2    7.90    3.80
 -14   7  -2    6.90    2.50
 -14   7  -2    6.10    1.70
 -15   7  -2    0.80    2.30
 -15   7  -2    2.60    4.10
 -15   7  -2   -1.40    2.00
 -16   7  -2    1.30    2.70
 -16   7  -2    0.60    4.00
 -16   7  -2   -3.40    2.10
 -17   7  -2   15.50    3.20
 -17   7  -2   16.70    4.70
 -17   7  -2   12.40    3.20
  11   6  -2    2.30    3.20
 -11  -6   2    9.40    3.00
 -11  -6   2    2.90    2.60
  10   6  -2   -2.00    2.80
 -10  -6   2    3.60    2.50
 -10  -6   2   -3.50    2.20
   9   6  -2    9.20    3.20
  -9  -6   2    9.80    2.90
  -9  -6   2    8.40    2.60
   8   6  -2    3.30    2.70
  -8  -6   2    2.70    3.00
  -8  -6   2    2.80    2.20
  -8  -6   2    6.10    2.30
  -8  -6   2    1.70    2.00
   7   6  -2   14.40    2.90
   7   6  -2   15.20    2.60
  -7  -6   2   20.40    2.70
  -7  -6   2   20.00    2.70
  -7  -6   2   18.90    2.50
  -7  -6   2   18.50    2.80
   6   6  -2    8.00    2.10
   6   6  -2    5.70    2.10
  -6  -6   2    8.20    1.80
  -6  -6   2   10.30    1.90
  -6  -6   2    5.70    1.80
  -6  -6   2    8.20    2.10
   5   6  -2   59.29    3.70
   5   6  -2   53.39    3.30
  -5  -6   2   59.99    3.10
  -5  -6   2   57.59    3.30
  -5  -6   2   59.49    3.30
  -5  -6   2   57.59    2.70
   4   6  -2   36.40    2.90
   4   6  -2   33.30    2.70
  -4  -6   2   33.10    2.40
  -4  -6   2   32.80    2.50
  -4  -6   2   29.40    2.50
  -4  -6   2   33.60    1.90
   3   6  -2    1.20    1.30
   3   6  -2    2.00    1.10
   3   6  -2   -0.40    1.40
  -3  -6   2    1.20    1.10
  -3  -6   2   -0.20    1.10
  -3  -6   2   -0.10    1.00
  -3  -6   2    0.90    1.20
   2   6  -2   29.30    2.10
   2   6  -2   31.30    2.60
   2   6  -2   32.30    2.40
  -2  -6   2   32.80    2.00
  -2  -6   2   30.60    1.90
  -2  -6   2   31.10    1.90
  -2  -6   2   30.50    2.20
   1   6  -2  122.59    4.20
   1   6  -2  122.19    4.70
   1   6  -2  121.69    3.40
   1   6  -2  119.69    4.10
  -1  -6   2  123.09    3.90
  -1  -6   2  121.19    3.70
  -1  -6   2  112.89    4.10
  -1  -6   2  120.39    3.60
   0   6  -2   53.39    2.40
   0   6  -2   53.99    3.00
   0   6  -2   50.59    2.00
   0   6  -2   57.99    2.50
   0   6  -2   56.39    1.90
   0  -6   2   54.89    2.20
   0  -6   2   51.99    2.70
   0  -6   2   53.69    2.00
  -1   6  -2  111.89    3.60
  -1   6  -2  106.19    3.00
  -1   6  -2  109.69    3.60
  -1   6  -2  112.59    4.20
  -1   6  -2  110.69    3.50
   1  -6   2  108.09    3.20
   1  -6   2  108.69    3.30
   1  -6   2  107.49    3.20
   1  -6   2  113.29    3.80
  -2   6  -2   79.69    3.50
  -2   6  -2   77.19    2.80
  -2   6  -2   81.19    2.40
  -2   6  -2   76.89    3.00
  -2   6  -2   80.39    2.80
   2  -6   2   76.19    2.50
   2  -6   2   80.49    2.60
  -3   6  -2  110.39    4.20
  -3   6  -2  110.69    3.10
  -3   6  -2  109.89    3.50
  -3   6  -2  117.79    3.50
  -3   6  -2  108.29    3.80
   3  -6   2  118.29    3.50
   3  -6   2  114.69    3.10
  -4   6  -2  113.19    3.20
  -4   6  -2  110.19    3.40
  -4   6  -2  113.39    4.20
  -4   6  -2  117.09    4.00
  -4   6  -2  117.09    3.50
   4  -6   2  111.39    3.10
  -5   6  -2  118.49    3.60
  -5   6  -2  120.89    3.60
  -5   6  -2  121.79    4.40
  -5   6  -2  116.79    3.40
  -6   6  -2    8.00    1.10
  -6   6  -2    8.60    1.20
  -6   6  -2    7.70    1.10
  -6   6  -2    9.80    2.00
  -6   6  -2    9.80    1.20
  -7   6  -2  443.96   10.80
  -7   6  -2  438.36   11.00
  -7   6  -2  441.46   10.90
  -7   6  -2  445.56   11.00
  -7   6  -2  430.06   12.00
  -8   6  -2   89.39    4.20
  -8   6  -2   88.19    3.30
  -8   6  -2   96.09    2.90
  -8   6  -2   87.79    3.00
  -8   6  -2   90.59    3.20
  -8   6  -2   91.39    3.40
  -9   6  -2    0.80    1.10
  -9   6  -2    2.30    2.10
  -9   6  -2    0.30    0.70
  -9   6  -2    0.70    1.30
  -9   6  -2    2.00    1.00
  -9   6  -2    0.00    0.80
 -10   6  -2    0.40    1.00
 -10   6  -2    0.70    1.20
 -10   6  -2    0.30    0.70
 -10   6  -2   -0.20    1.30
 -10   6  -2    0.90    0.90
 -10   6  -2   -0.60    2.20
 -11   6  -2   -2.90    1.90
 -11   6  -2    0.10    1.00
 -11   6  -2    1.00    1.10
 -11   6  -2    1.10    0.60
 -11   6  -2    0.30    1.30
 -11   6  -2    0.40    1.60
 -12   6  -2   19.80    3.40
 -12   6  -2   17.80    2.50
 -12   6  -2   17.30    2.60
 -12   6  -2   20.00    2.30
 -13   6  -2   30.70    2.60
 -13   6  -2   30.30    3.30
 -13   6  -2   36.30    4.00
 -13   6  -2   28.60    3.20
 -14   6  -2    9.90    3.50
 -14   6  -2    6.00    2.30
 -14   6  -2   -0.60    2.10
 -14   6  -2    2.90    1.80
 -15   6  -2   26.20    5.00
 -15   6  -2   23.40    3.40
 -15   6  -2   11.70    2.70
 -15   6  -2    9.90    2.20
 -16   6  -2    4.90    2.70
 -16   6  -2    3.50    2.60
 -16   6  -2    7.30    4.00
 -17   6  -2    3.30    3.00
 -17   6  -2   -1.00    2.70
 -17   6  -2   11.30    4.80
  12   5  -2   -1.00    2.90
 -12  -5   2    0.70    2.50
 -12  -5   2   -2.70    2.50
  11   5  -2   -0.80    2.70
 -11  -5   2    4.20    2.70
 -11  -5   2    1.50    2.40
  10   5  -2    1.20    2.70
 -10  -5   2    4.30    2.60
 -10  -5   2    7.40    2.70
 -10  -5   2   -2.50    2.30
   9   5  -2   13.60    3.10
  -9  -5   2   19.40    2.80
  -9  -5   2   19.10    2.80
  -9  -5   2   21.30    3.00
  -9  -5   2   15.00    2.80
   8   5  -2    1.00    2.10
   8   5  -2    0.90    2.30
  -8  -5   2    3.30    2.10
  -8  -5   2    3.40    2.00
  -8  -5   2    3.10    2.00
  -8  -5   2   -1.70    1.90
   7   5  -2    0.20    2.00
   7   5  -2   -2.00    1.70
  -7  -5   2   -0.20    1.60
  -7  -5   2   -1.20    1.60
  -7  -5   2    2.50    1.60
  -7  -5   2    0.40    1.60
   6   5  -2   -0.40    1.70
   6   5  -2   -1.20    1.50
  -6  -5   2   -1.40    1.50
  -6  -5   2   -0.80    1.30
  -6  -5   2    0.60    1.40
  -6  -5   2   -0.90    1.40
   5   5  -2   11.70    2.20
   5   5  -2   14.40    2.10
  -5  -5   2   11.80    1.70
  -5  -5   2   14.90    2.00
  -5  -5   2   14.80    1.90
  -5  -5   2   14.50    1.90
   4   5  -2    3.00    1.40
   4   5  -2    6.00    1.70
  -4  -5   2    4.80    1.20
  -4  -5   2    2.60    1.40
  -4  -5   2    5.00    1.30
  -4  -5   2    2.20    1.20
   3   5  -2   -0.20    1.30
   3   5  -2   -0.90    1.00
   3   5  -2   -0.50    1.10
  -3  -5   2   -0.80    1.10
  -3  -5   2    0.50    1.00
  -3  -5   2   -0.20    1.10
  -3  -5   2    1.60    1.30
   2   5  -2   81.99    3.30
   2   5  -2   76.09    3.00
   2   5  -2   83.49    3.60
  -2  -5   2   81.79    3.20
  -2  -5   2   81.69    3.00
  -2  -5   2   79.99    2.90
  -2  -5   2   77.69    2.90
   1   5  -2  156.18    4.70
   1   5  -2  148.69    4.50
   1   5  -2  152.58    4.10
   1   5  -2  151.58    5.00
  -1  -5   2  146.09    4.20
  -1  -5   2  158.18    4.80
  -1  -5   2  151.68    4.40
  -1  -5   2  148.19    4.30
   0   5  -2   81.29    2.40
   0   5  -2   77.79    3.20
   0   5  -2   78.09    2.70
   0   5  -2   76.39    2.70
   0   5  -2   78.99    2.40
   0  -5   2   78.19    2.50
   0  -5   2   81.69    2.30
   0  -5   2   71.79    2.90
  -1   5  -2   42.60    1.90
  -1   5  -2   47.20    1.90
  -1   5  -2   46.90    2.00
  -1   5  -2   45.30    1.60
  -1   5  -2   48.00    2.50
   1  -5   2   43.10    2.10
   1  -5   2   48.50    1.70
   1  -5   2   49.10    1.60
  -2   5  -2    1.40    1.10
  -2   5  -2    2.20    0.70
  -2   5  -2    1.20    0.70
  -2   5  -2    1.10    0.70
  -2   5  -2    0.50    0.90
  -2   5  -2    1.20    0.70
   2  -5   2   -0.30    0.70
   2  -5   2    1.60    0.50
  -3   5  -2  336.47    8.80
  -3   5  -2  340.47    9.20
  -3   5  -2  342.27    8.30
  -3   5  -2  344.97    8.50
  -3   5  -2  350.26    8.50
   3  -5   2  344.67    8.20
   3  -5   2  353.36    8.60
  -4   5  -2  155.28    4.70
  -4   5  -2  150.58    4.10
  -4   5  -2  148.89    4.10
  -4   5  -2  157.68    4.10
   4  -5   2  148.99    3.80
  -5   5  -2  155.28    4.10
  -5   5  -2  146.89    4.90
  -5   5  -2  154.28    4.40
  -5   5  -2  161.38    4.30
  -5   5  -2  153.08    4.20
   5  -5   2  156.38    4.00
  -6   5  -2  113.79    3.40
  -6   5  -2  116.89    3.50
  -6   5  -2  109.79    3.20
  -6   5  -2  112.19    3.40
  -6   5  -2  102.29    4.20
   6  -5   2  110.99    3.30
  -7   5  -2  311.67    7.90
  -7   5  -2  299.07    8.80
  -7   5  -2  296.27    7.50
  -7   5  -2  297.37    7.90
  -7   5  -2  312.77    7.60
  -7   5  -2  302.17    7.90
   7  -5   2  304.27    7.90
  -8   5  -2    6.90    1.90
  -8   5  -2    7.30    1.10
  -8   5  -2    7.70    1.20
  -8   5  -2   10.70    1.50
  -8   5  -2    8.90    1.20
  -8   5  -2    9.60    1.30
   8  -5   2    9.00    1.30
  -9   5  -2  188.78    5.80
  -9   5  -2  192.58    5.60
  -9   5  -2  189.78    4.90
  -9   5  -2  198.38    5.80
  -9   5  -2  184.38    5.40
  -9   5  -2  193.58    6.80
   9  -5   2  187.18    5.70
 -10   5  -2   57.29    1.80
 -10   5  -2   59.89    2.80
 -10   5  -2   59.69    2.70
 -10   5  -2   61.29    3.10
 -10   5  -2   59.79    3.00
 -10   5  -2   57.09    3.70
  10  -5   2   55.89    3.00
 -11   5  -2   16.90    2.90
 -11   5  -2   21.60    2.10
 -11   5  -2   17.80    2.00
 -11   5  -2   19.50    2.50
 -11   5  -2   18.20    2.40
 -12   5  -2    7.90    3.00
 -12   5  -2   13.30    2.40
 -12   5  -2    8.20    2.00
 -12   5  -2   11.30    1.80
 -13   5  -2  123.09    5.40
 -13   5  -2  123.89    5.30
 -13   5  -2  119.89    4.80
 -13   5  -2  133.69    6.80
 -14   5  -2   -0.20    1.70
 -14   5  -2   -2.50    2.10
 -14   5  -2   -1.30    2.10
 -14   5  -2    2.10    3.30
 -15   5  -2    6.70    3.60
 -15   5  -2    3.30    2.00
 -15   5  -2    2.60    2.50
 -15   5  -2    9.10    3.10
 -16   5  -2   16.90    5.00
 -16   5  -2    8.70    2.90
 -16   5  -2    9.50    2.50
 -16   5  -2    6.90    2.90
 -17   5  -2    2.10    2.90
 -17   5  -2   20.40    5.20
 -17   5  -2    3.00    3.10
  13   4  -2   -2.50    3.00
 -13  -4   2    9.90    3.30
 -13  -4   2    3.40    2.80
  12   4  -2    6.00    3.20
 -12  -4   2    2.40    2.60
 -12  -4   2    4.50    2.80
 -12  -4   2    2.20    2.80
  11   4  -2    0.10    3.00
 -11  -4   2   -3.40    2.30
 -11  -4   2    3.10    2.60
 -11  -4   2    2.70    2.40
 -11  -4   2   -3.70    2.10
  10   4  -2    3.70    2.70
 -10  -4   2   -0.70    2.40
 -10  -4   2   -0.80    2.10
 -10  -4   2   -2.90    2.20
 -10  -4   2    1.90    2.40
   9   4  -2  107.49    5.50
  -9  -4   2  108.09    5.00
  -9  -4   2  109.79    5.00
  -9  -4   2  103.19    5.00
  -9  -4   2  102.79    4.90
   8   4  -2  124.69    5.50
   8   4  -2  119.89    5.10
  -8  -4   2  123.49    5.00
  -8  -4   2  132.89    5.40
  -8  -4   2  122.69    4.80
  -8  -4   2  114.19    4.90
   7   4  -2   17.80    2.80
   7   4  -2   15.40    2.40
  -7  -4   2   17.60    2.30
  -7  -4   2   18.00    2.30
  -7  -4   2   15.70    2.20
  -7  -4   2   20.00    2.40
   6   4  -2    5.50    2.00
   6   4  -2    5.30    1.50
  -6  -4   2    2.60    1.30
  -6  -4   2    5.10    1.60
  -6  -4   2    6.20    1.60
  -6  -4   2    3.80    1.50
   5   4  -2  231.48    7.00
   5   4  -2  237.18    7.30
  -5  -4   2  233.58    6.50
  -5  -4   2  229.88    6.80
  -5  -4   2  227.88    6.90
  -5  -4   2  228.98    6.70
   4   4  -2  235.28    7.20
   4   4  -2  240.88    6.90
  -4  -4   2  232.68    6.80
  -4  -4   2  245.08    6.60
  -4  -4   2  231.68    6.70
  -4  -4   2  228.58    6.30
   3   4  -2   30.60    2.00
   3   4  -2   35.00    2.30
   3   4  -2   29.80    1.90
  -3  -4   2   29.50    1.90
  -3  -4   2   30.90    1.90
  -3  -4   2   29.70    2.00
   2   4  -2  318.37    8.20
   2   4  -2  314.07    8.60
   2   4  -2  317.67    8.40
   2   4  -2  323.57    8.00
  -2  -4   2  319.97    8.20
  -2  -4   2  320.27    8.10
  -2  -4   2  320.27    8.40
   1   4  -2  442.86   10.70
   1   4  -2  420.66   11.10
   1   4  -2  447.96   10.80
   1   4  -2  447.66   10.40
  -1  -4   2  432.36   10.40
  -1  -4   2  443.06   10.60
  -1  -4   2  424.36   10.80
  -1  -4   2  423.46   10.50
   0   4  -2   53.99    2.10
   0   4  -2   49.99    1.90
   0   4  -2   54.09    1.70
   0   4  -2   53.89    2.40
   0   4  -2   52.39    1.80
   0   4  -2   50.49    2.30
   0  -4   2   49.40    1.90
   0  -4   2   49.90    2.10
   0  -4   2   51.49    1.60
  -1   4  -2    1.50    0.70
  -1   4  -2    1.10    0.80
  -1   4  -2    2.60    0.70
  -1   4  -2    0.20    0.80
  -1   4  -2    2.20    1.10
  -1   4  -2    1.40    0.70
   1  -4   2    1.60    0.60
   1  -4   2    1.10    1.20
   1  -4   2    1.00    0.80
   1  -4   2    1.90    0.60
   1  -4   2    2.60    1.00
  -2   4  -2 1458.45   34.10
  -2   4  -2 1580.74   34.30
  -2   4  -2 1428.06   34.80
  -2   4  -2 1416.16   34.20
   2  -4   2 1547.25   33.90
   2  -4   2 1500.05   35.60
   2  -4   2 1407.06   34.10
   2  -4   2 1372.26   33.60
  -3   4  -2   24.10    1.20
  -3   4  -2   26.60    1.20
  -3   4  -2   23.70    1.60
  -3   4  -2   20.70    1.80
  -3   4  -2   25.20    1.30
   3  -4   2   25.20    1.50
   3  -4   2   24.80    0.90
   3  -4   2   25.00    1.00
  -4   4  -2   51.99    2.30
  -4   4  -2   53.59    1.70
  -4   4  -2   49.00    1.70
  -4   4  -2   52.29    1.80
  -4   4  -2   49.50    2.00
   4  -4   2   49.00    1.60
   4  -4   2   48.40    1.90
  -5   4  -2  218.48    6.40
  -5   4  -2  227.58    5.80
  -5   4  -2  217.58    5.80
  -5   4  -2  223.68    5.50
  -5   4  -2  217.78    5.70
   5  -4   2  222.98    5.60
   5  -4   2  230.28    6.00
  -6   4  -2   17.00    1.20
  -6   4  -2   15.10    1.30
  -6   4  -2   16.80    1.40
  -6   4  -2   14.20    1.80
  -6   4  -2   16.40    1.30
  -6   4  -2   14.90    1.10
   6  -4   2   15.90    1.30
  -7   4  -2  293.17    8.80
  -7   4  -2  305.87    7.60
  -7   4  -2  308.57    8.00
  -7   4  -2  310.57    8.10
  -7   4  -2  332.57    7.90
  -7   4  -2  304.87    8.10
   7  -4   2  322.57    8.10
  -8   4  -2   25.50    1.80
  -8   4  -2   23.00    2.50
  -8   4  -2   22.20    1.70
  -8   4  -2   23.90    1.80
  -8   4  -2   24.10    1.70
  -8   4  -2   24.30    1.20
   8  -4   2   23.70    1.80
  -9   4  -2   62.69    2.80
  -9   4  -2   64.49    2.80
  -9   4  -2   57.09    1.80
  -9   4  -2   62.29    3.70
  -9   4  -2   58.39    2.80
  -9   4  -2   62.69    2.60
   9  -4   2   64.19    2.90
 -10   4  -2    5.30    1.30
 -10   4  -2    4.80    1.20
 -10   4  -2    4.00    2.10
 -10   4  -2    2.90    1.40
 -10   4  -2    1.50    1.30
  10  -4   2    2.10    1.20
 -11   4  -2   41.00    2.70
 -11   4  -2   45.90    3.10
 -11   4  -2   44.60    2.70
 -11   4  -2   44.80    2.90
 -11   4  -2   47.40    4.00
 -12   4  -2   70.79    3.50
 -12   4  -2   67.09    3.70
 -12   4  -2   72.19    3.90
 -12   4  -2   65.19    4.50
 -13   4  -2   30.30    3.30
 -13   4  -2   37.50    4.50
 -13   4  -2   32.10    3.40
 -13   4  -2   33.00    3.00
 -14   4  -2   18.80    2.60
 -14   4  -2   27.80    3.30
 -14   4  -2   26.40    3.70
 -14   4  -2   24.90    4.60
 -15   4  -2    2.70    2.20
 -15   4  -2    5.00    2.60
 -15   4  -2    4.00    2.60
 -15   4  -2    6.80    4.00
 -16   4  -2   -0.90    2.50
 -16   4  -2   -1.80    2.10
 -16   4  -2    5.60    4.20
 -16   4  -2    5.10    3.00
  14   3  -2    1.50    3.30
  13   3  -2   17.90    3.80
 -13  -3   2   14.10    3.20
 -13  -3   2    1.30    3.10
 -13  -3   2    7.00    3.00
  12   3  -2    1.70    3.40
 -12  -3   2    9.70    3.10
 -12  -3   2    6.10    3.00
 -12  -3   2    2.70    2.40
 -12  -3   2   -1.40    2.30
  11   3  -2    8.30    3.20
 -11  -3   2    8.90    3.00
 -11  -3   2    7.50    2.50
 -11  -3   2    1.90    2.30
 -11  -3   2    6.60    2.60
  10   3  -2   28.60    3.70
 -10  -3   2   24.60    3.30
 -10  -3   2   25.20    3.50
 -10  -3   2   27.20    3.00
 -10  -3   2   25.00    3.40
   9   3  -2    3.00    2.50
  -9  -3   2    2.00    1.70
  -9  -3   2    1.90    2.10
  -9  -3   2    0.40    1.90
  -9  -3   2    0.70    1.90
   8   3  -2   35.00    3.20
   8   3  -2   39.10    3.10
  -8  -3   2   39.90    2.90
  -8  -3   2   36.70    2.90
  -8  -3   2   38.40    3.10
  -8  -3   2   41.70    2.80
   7   3  -2  121.09    5.10
   7   3  -2  117.49    4.70
  -7  -3   2  113.59    4.40
  -7  -3   2  115.09    4.40
  -7  -3   2  122.49    4.60
  -7  -3   2  118.19    4.50
   6   3  -2  127.39    4.80
   6   3  -2  123.29    4.50
  -6  -3   2  125.19    4.30
  -6  -3   2  119.69    4.30
  -6  -3   2  119.69    4.40
  -6  -3   2  123.19    4.50
   5   3  -2   87.79    3.80
   5   3  -2   84.79    3.50
  -5  -3   2   89.39    3.30
  -5  -3   2   91.69    3.30
  -5  -3   2   84.29    3.50
  -5  -3   2   88.09    3.40
   4   3  -2   39.10    2.20
   4   3  -2   34.90    2.40
   4   3  -2   40.30    2.10
  -4  -3   2   40.60    2.20
  -4  -3   2   38.90    2.20
  -4  -3   2   37.50    1.90
  -4  -3   2   39.40    2.10
  -4  -3   2   35.60    2.10
   3   3  -2   38.10    1.80
   3   3  -2   38.60    2.20
   3   3  -2   35.60    2.10
  -3  -3   2   37.60    1.90
  -3  -3   2   37.80    2.00
  -3  -3   2   39.20    1.90
  -3  -3   2   37.10    1.60
  -3  -3   2   42.90    2.10
   2   3  -2    8.00    1.00
   2   3  -2    8.50    1.00
   2   3  -2    7.20    1.00
   2   3  -2    7.60    1.10
   2   3  -2    7.70    1.20
  -2  -3   2    6.90    1.00
  -2  -3   2    8.80    1.10
  -2  -3   2    8.00    0.80
  -2  -3   2    6.60    1.00
  -2  -3   2    7.30    1.10
   1   3  -2  265.67    6.50
   1   3  -2  265.87    6.70
   1   3  -2  257.27    7.00
   1   3  -2  254.77    6.60
   1   3  -2  269.87    6.80
  -1  -3   2  267.37    6.60
  -1  -3   2  259.17    6.60
  -1  -3   2  266.17    6.80
  -1  -3   2  259.27    6.80
  -1  -3   2  266.17    7.00
   0   3  -2 1216.08   27.80
   0   3  -2 1254.17   28.60
   0   3  -2 1161.68   27.60
   0   3  -2 1191.08   28.10
   0   3  -2 1165.78   27.80
   0  -3   2 1236.78   28.00
   0  -3   2 1191.78   27.70
   0  -3   2 1183.68   27.80
   0  -3   2 1221.78   28.10
  -1   3  -2  146.69    3.80
  -1   3  -2  145.09    4.00
  -1   3  -2  155.58    4.00
  -1   3  -2  153.38    3.80
  -1   3  -2  148.59    3.80
  -1   3  -2  158.38    4.40
   1  -3   2  147.99    3.70
   1  -3   2  152.18    3.90
   1  -3   2  153.68    3.70
   1  -3   2  154.88    4.30
  -2   3  -2   89.39    2.30
  -2   3  -2   85.29    2.90
  -2   3  -2   89.49    2.30
  -2   3  -2   86.19    2.60
   2  -3   2   89.49    2.60
   2  -3   2   88.79    2.30
   2  -3   2   94.79    2.10
   2  -3   2   83.19    2.30
  -3   3  -2 4131.89   92.89
  -3   3  -2 4152.48   92.79
  -3   3  -2 3996.80   95.69
  -3   3  -2 4026.80   94.59
  -3   3  -2 3891.61   94.79
   3  -3   2 3835.02   94.49
   3  -3   2 4129.99   92.19
   3  -3   2 4230.58   92.59
  -4   3  -2 2432.36   56.69
  -4   3  -2 2402.56   55.89
  -4   3  -2 2545.15   55.79
  -4   3  -2 2402.36   56.09
  -4   3  -2 2406.36   56.49
  -4   3  -2 2460.35   57.29
   4  -3   2 2328.67   55.49
   4  -3   2 2367.66   55.49
   4  -3   2 2438.06   55.39
  -5   3  -2   53.59    1.80
  -5   3  -2   48.00    2.30
  -5   3  -2   49.50    1.70
  -5   3  -2   49.20    1.90
  -5   3  -2   48.00    1.70
  -5   3  -2   47.60    2.00
   5  -3   2   50.79    2.10
   5  -3   2   51.49    1.80
  -6   3  -2  103.99    3.10
  -6   3  -2  104.89    3.30
  -6   3  -2  104.89    3.40
  -6   3  -2  105.39    3.90
  -6   3  -2  100.29    3.20
  -6   3  -2  106.79    2.90
   6  -3   2  103.39    3.20
  -7   3  -2  126.69    4.10
  -7   3  -2  127.79    3.40
  -7   3  -2  134.59    4.00
  -7   3  -2  128.19    4.00
  -7   3  -2  132.99    4.10
  -7   3  -2  123.49    4.60
   7  -3   2  133.49    4.10
  -8   3  -2  120.99    4.70
  -8   3  -2  114.49    3.90
  -8   3  -2  116.39    3.90
  -8   3  -2  112.89    3.90
  -8   3  -2  117.69    3.10
  -8   3  -2  116.29    3.90
   8  -3   2  111.39    3.90
  -9   3  -2   21.00    1.90
  -9   3  -2   16.90    1.70
  -9   3  -2   16.30    2.10
  -9   3  -2   19.90    0.90
  -9   3  -2   22.60    1.90
  -9   3  -2   18.90    2.70
   9  -3   2   18.60    1.90
 -10   3  -2    7.40    1.60
 -10   3  -2    5.60    1.60
 -10   3  -2    6.00    1.50
 -10   3  -2    9.30    1.60
 -10   3  -2    7.80    2.30
  10  -3   2    8.10    1.50
 -11   3  -2   47.40    3.00
 -11   3  -2   42.00    3.60
 -11   3  -2   40.90    3.10
 -11   3  -2   45.80    3.10
 -12   3  -2   44.10    3.50
 -12   3  -2   44.40    3.60
 -12   3  -2   48.70    4.00
 -12   3  -2   45.70    3.00
 -13   3  -2   31.70    3.20
 -13   3  -2   36.60    4.10
 -13   3  -2   31.60    3.60
 -13   3  -2   26.90    3.10
 -14   3  -2    2.40    3.30
 -14   3  -2   -3.10    2.20
 -14   3  -2   -0.80    2.10
 -14   3  -2   -2.20    2.20
 -15   3  -2   -5.20    2.20
 -15   3  -2    2.10    2.90
 -15   3  -2    5.70    3.90
 -15   3  -2    0.00    2.10
 -16   3  -2    6.90    4.20
 -16   3  -2   -1.10    2.50
 -16   3  -2    2.20    2.20
 -16   3  -2    1.10    2.80
  14   2  -2    5.20    3.80
 -14  -2   2    3.50    2.50
 -14  -2   2   11.20    3.80
 -14  -2   2    0.20    2.80
 -14  -2   2    8.90    3.30
  13   2  -2    4.80    3.40
 -13  -2   2   -1.50    2.50
 -13  -2   2   -3.30    2.60
 -13  -2   2    6.80    3.10
 -13  -2   2    5.50    3.30
  12   2  -2    8.30    3.00
 -12  -2   2   -0.80    2.30
 -12  -2   2    7.70    2.50
 -12  -2   2    1.10    2.60
 -12  -2   2    4.70    3.00
  11   2  -2    3.70    2.70
 -11  -2   2    6.40    2.60
 -11  -2   2    2.50    2.30
 -11  -2   2    7.30    3.00
 -11  -2   2   -0.20    1.80
  10   2  -2   11.60    2.90
 -10  -2   2   23.80    3.30
 -10  -2   2   20.10    3.20
 -10  -2   2   21.40    3.00
 -10  -2   2   26.10    2.80
   9   2  -2    4.10    2.00
   9   2  -2    3.10    1.80
  -9  -2   2    4.40    2.20
  -9  -2   2    4.60    1.80
  -9  -2   2    4.20    1.80
  -9  -2   2    3.70    1.70
   8   2  -2   12.70    2.00
   8   2  -2   12.80    2.40
  -8  -2   2   12.80    2.20
  -8  -2   2   15.20    2.00
  -8  -2   2   13.20    2.00
  -8  -2   2   15.50    2.00
   7   2  -2   80.99    3.90
   7   2  -2   84.49    3.70
  -7  -2   2   85.79    3.70
  -7  -2   2   87.09    3.50
  -7  -2   2   85.29    3.70
  -7  -2   2   83.29    3.50
  -7  -2   2   83.39    3.70
   6   2  -2   76.79    3.60
   6   2  -2   79.99    3.40
  -6  -2   2   73.89    3.10
  -6  -2   2   77.09    3.30
  -6  -2   2   75.39    3.20
  -6  -2   2   76.39    3.20
  -6  -2   2   75.49    3.20
   5   2  -2  105.59    3.10
   5   2  -2  103.39    3.80
   5   2  -2  101.19    4.00
  -5  -2   2  107.29    3.60
  -5  -2   2   98.39    3.60
  -5  -2   2  108.89    3.80
  -5  -2   2  101.69    3.70
  -5  -2   2  110.29    3.80
   4   2  -2   12.40    1.60
   4   2  -2    9.50    1.00
   4   2  -2   10.10    1.20
   4   2  -2   10.40    1.40
  -4  -2   2   10.20    1.30
  -4  -2   2   10.20    1.30
  -4  -2   2   10.00    1.20
  -4  -2   2   11.40    1.40
  -4  -2   2    9.80    1.30
   3   2  -2   22.80    1.20
   3   2  -2   24.80    1.40
   3   2  -2   23.00    1.70
   3   2  -2   22.30    1.60
  -3  -2   2   20.90    1.30
  -3  -2   2   23.70    1.50
  -3  -2   2   22.80    1.50
  -3  -2   2   22.80    1.50
  -3  -2   2   23.40    1.50
   2   2  -2  180.88    4.80
   2   2  -2  184.88    4.70
   2   2  -2  174.58    4.60
   2   2  -2  175.48    4.70
   2   2  -2  173.48    5.00
  -2  -2   2  169.58    4.70
  -2  -2   2  165.08    4.40
  -2  -2   2  163.68    4.60
  -2  -2   2  182.08    4.80
  -2  -2   2  176.78    4.90
  -2  -2   2  179.98    4.80
   1   2  -2  304.17    7.40
   1   2  -2  306.47    7.30
   1   2  -2  297.77    7.30
   1   2  -2  302.77    7.40
   1   2  -2  294.07    7.60
  -1  -2   2  309.97    7.60
  -1  -2   2  303.77    7.10
  -1  -2   2  295.87    7.50
  -1  -2   2  307.77    7.40
  -1  -2   2  308.67    7.40
  -1  -2   2  300.57    7.40
   0   2  -2  371.96    9.10
   0   2  -2  371.06    8.90
   0   2  -2  385.36    9.00
   0   2  -2  393.96    8.90
   0   2  -2  378.36    9.10
   0  -2   2  387.16    9.10
   0  -2   2  352.46    9.00
   0  -2   2  386.86    9.10
   0  -2   2  374.66    8.90
  -1   2  -2   75.79    1.80
  -1   2  -2   75.89    2.30
  -1   2  -2   76.99    1.80
   1  -2   2   73.29    2.30
   1  -2   2   73.69    1.80
   1  -2   2   73.49    1.90
  -2   2  -2  558.84   13.20
  -2   2  -2  595.64   13.50
  -2   2  -2  559.64   13.30
  -3   2  -2 6902.41  157.08
  -3   2  -2 7326.37  154.68
  -3   2  -2 6387.26  153.58
  -3   2  -2 6861.41  152.68
  -3   2  -2 6625.74  152.08
   3  -2   2 6577.04  152.28
   3  -2   2 6520.35  152.08
   3  -2   2 6440.86  153.78
   3  -2   2 6371.56  153.68
   3  -2   2 6500.85  160.68
  -4   2  -2 1268.27   29.10
  -4   2  -2 1255.57   29.00
  -4   2  -2 1303.97   29.50
  -4   2  -2 1254.77   29.30
  -4   2  -2 1283.97   29.00
  -4   2  -2 1275.17   29.60
  -4   2  -2 1279.47   29.30
   4  -2   2 1240.58   28.90
   4  -2   2 1239.18   29.40
   4  -2   2 1237.98   29.10
  -5   2  -2   28.60    1.60
  -5   2  -2   31.90    1.70
  -5   2  -2   30.40    1.20
  -5   2  -2   31.00    1.50
  -5   2  -2   29.60    1.50
  -5   2  -2   30.50    2.00
   5  -2   2   29.80    1.50
   5  -2   2   30.40    1.20
  -6   2  -2  296.77    7.50
  -6   2  -2  316.47    8.00
  -6   2  -2  318.07    8.10
  -6   2  -2  317.17    8.00
  -6   2  -2  323.07    8.20
  -6   2  -2  309.47    8.60
   6  -2   2  300.57    8.50
   6  -2   2  309.47    7.50
   6  -2   2  321.17    8.00
  -7   2  -2   73.39    2.10
  -7   2  -2   72.29    3.30
  -7   2  -2   74.49    2.80
  -7   2  -2   72.19    2.80
  -7   2  -2   71.19    2.80
  -7   2  -2   71.59    2.80
   7  -2   2   70.29    2.80
   7  -2   2   73.79    3.40
   7  -2   2   71.89    2.20
  -8   2  -2   44.00    2.40
  -8   2  -2   46.80    2.50
  -8   2  -2   51.29    2.50
  -8   2  -2   41.20    2.80
  -8   2  -2   46.40    2.40
  -8   2  -2   46.80    1.60
   8  -2   2   48.90    3.20
   8  -2   2   45.10    2.40
   8  -2   2   45.00    1.60
  -9   2  -2  156.08    5.10
  -9   2  -2  151.48    5.00
  -9   2  -2  152.98    5.80
  -9   2  -2  146.99    5.00
  -9   2  -2  149.29    3.80
  -9   2  -2  152.38    5.10
   9  -2   2  146.29    3.90
   9  -2   2  152.48    5.00
   9  -2   2  159.68    5.90
 -10   2  -2   29.50    2.50
 -10   2  -2   27.50    2.50
 -10   2  -2   24.40    2.30
 -10   2  -2   21.00    2.20
 -10   2  -2   26.60    3.20
  10  -2   2   25.20    2.90
 -11   2  -2   -0.60    1.80
 -11   2  -2    2.40    2.30
 -11   2  -2   -1.00    1.50
 -11   2  -2   -0.90    1.60
  11  -2   2    1.90    2.40
 -12   2  -2   -1.10    1.50
 -12   2  -2    2.70    3.00
 -12   2  -2   -1.40    2.10
 -12   2  -2    1.90    1.90
  12  -2   2   -0.80    2.70
 -13   2  -2    4.50    2.40
 -13   2  -2    9.00    3.60
 -13   2  -2    5.60    2.20
 -13   2  -2    4.60    2.40
  13  -2   2    4.50    2.90
 -14   2  -2   15.10    3.70
 -14   2  -2    6.70    2.50
 -14   2  -2    7.30    3.00
 -14   2  -2    6.80    2.80
 -15   2  -2    5.80    2.80
 -15   2  -2   -0.30    2.40
 -15   2  -2   -0.40    2.50
 -15   2  -2    3.20    3.90
 -16   2  -2    4.50    3.20
 -16   2  -2    2.40    2.60
 -16   2  -2   -4.30    2.90
 -16   2  -2    6.10    3.70
  15   1  -2    2.60    3.30
 -15  -1   2   -3.40    3.00
 -15  -1   2    5.20    2.90
 -15  -1   2    1.80    2.50
 -15  -1   2   14.50    4.20
  14   1  -2   20.20    4.20
 -14  -1   2   25.50    4.40
 -14  -1   2   11.40    3.60
 -14  -1   2   15.70    2.90
 -14  -1   2   15.20    3.20
  13   1  -2    0.80    3.00
 -13  -1   2    5.00    2.90
 -13  -1   2   -1.40    2.00
 -13  -1   2    5.80    3.30
 -13  -1   2   -0.70    2.70
  12   1  -2   16.60    3.70
 -12  -1   2    9.00    2.30
 -12  -1   2   16.60    3.60
 -12  -1   2    6.80    2.80
 -12  -1   2   10.20    2.90
  11   1  -2    6.90    2.70
 -11  -1   2   14.10    3.30
 -11  -1   2   13.60    2.50
 -11  -1   2    8.20    2.30
 -11  -1   2    5.80    2.40
  10   1  -2   37.40    3.90
 -10  -1   2   38.30    3.60
 -10  -1   2   40.80    3.50
 -10  -1   2   42.40    2.90
 -10  -1   2   39.00    3.00
   9   1  -2   11.20    2.30
   9   1  -2   10.60    1.80
  -9  -1   2   13.20    1.90
  -9  -1   2   12.70    2.60
  -9  -1   2   15.00    2.30
  -9  -1   2   16.30    2.40
  -9  -1   2   11.40    2.00
   8   1  -2  249.48    7.70
   8   1  -2  252.27    8.00
   8   1  -2  256.97    6.60
  -8  -1   2  255.87    7.50
  -8  -1   2  254.57    7.50
  -8  -1   2  263.37    7.70
  -8  -1   2  254.67    7.70
  -8  -1   2  268.07    8.00
   7   1  -2   17.60    1.30
   7   1  -2   17.20    2.10
   7   1  -2   17.60    2.30
  -7  -1   2   21.20    2.00
  -7  -1   2   16.20    1.80
  -7  -1   2   18.80    2.20
  -7  -1   2   17.40    1.80
  -7  -1   2   19.90    2.20
   6   1  -2   42.80    1.70
   6   1  -2   47.20    2.70
   6   1  -2   45.50    2.40
  -6  -1   2   44.70    2.40
  -6  -1   2   38.60    2.30
  -6  -1   2   47.30    2.60
  -6  -1   2   43.90    2.60
  -6  -1   2   45.10    2.40
   5   1  -2   20.30    2.00
   5   1  -2   18.10    1.80
   5   1  -2   16.90    1.00
  -5  -1   2   20.30    1.80
  -5  -1   2   15.20    1.80
  -5  -1   2   15.80    1.50
  -5  -1   2   17.00    1.50
  -5  -1   2   20.90    1.80
   4   1  -2  461.05   11.70
   4   1  -2  467.25   11.10
   4   1  -2  477.65   11.60
   4   1  -2  477.75   11.90
  -4  -1   2  480.15   11.70
  -4  -1   2  486.75   11.70
  -4  -1   2  470.05   11.70
  -4  -1   2  466.45   11.60
  -4  -1   2  478.35   11.60
   3   1  -2  572.14   14.00
   3   1  -2  569.04   13.90
   3   1  -2  566.04   13.70
   3   1  -2  602.74   13.80
   3   1  -2  573.64   13.70
   3   1  -2  597.94   13.80
  -3  -1   2  595.54   13.80
  -3  -1   2  571.94   13.80
  -3  -1   2  565.44   13.80
  -3  -1   2  553.64   13.80
  -3  -1   2  573.74   14.00
  -3  -1   2  574.24   13.70
   2   1  -2   14.70    1.20
   2   1  -2   13.90    1.10
   2   1  -2   12.10    0.90
   2   1  -2   13.40    1.20
   2   1  -2   12.00    0.90
   2   1  -2   13.50    1.00
  -2  -1   2   10.40    1.10
  -2  -1   2    9.80    1.00
  -2  -1   2   15.30    1.10
  -2  -1   2   14.50    1.20
  -2  -1   2   10.90    1.10
  -2  -1   2   11.30    1.00
   1   1  -2  221.48    5.60
   1   1  -2  228.08    5.60
   1   1  -2  231.88    5.60
   1   1  -2  227.48    5.60
   1   1  -2  224.88    5.60
   1   1  -2  230.48    5.50
  -1  -1   2  221.48    5.50
  -1  -1   2  239.28    5.60
  -1  -1   2  237.18    5.60
  -1  -1   2  232.38    5.60
  -1  -1   2  220.38    5.60
  -1  -1   2  230.08    5.60
   0   1  -2  639.34   14.70
   0   1  -2  631.24   14.30
   0   1  -2  647.54   14.30
   0   1  -2  632.94   15.00
   0   1  -2  573.64   14.20
   0   1  -2  653.23   14.60
   0  -1   2  616.24   15.10
   0  -1   2  617.64   14.30
   0  -1   2  586.84   14.30
   0  -1   2  583.24   14.40
  -1   1  -2  179.78    4.40
  -1   1  -2  177.38    4.20
  -1   1  -2  183.08    4.30
  -1   1  -2  178.78    4.20
   1  -1   2  179.38    4.20
   1  -1   2  177.78    4.30
   1  -1   2  179.38    4.40
   1  -1   2  179.08    4.20
  -2   1  -2  128.89    3.40
  -2   1  -2  132.19    3.30
  -2   1  -2  135.19    3.30
  -2   1  -2  133.09    3.50
  -2   1  -2  135.59    3.30
  -2   1  -2  129.09    3.40
   2  -1   2  131.99    3.30
   2  -1   2  127.99    3.50
   2  -1   2  128.99    3.50
   2  -1   2  133.99    3.30
   2  -1   2  134.49    3.30
  -3   1  -2 5077.09  123.19
  -3   1  -2 5379.96  122.19
  -3   1  -2 5517.35  123.29
  -3   1  -2 5863.51  123.79
  -3   1  -2 5148.19  122.09
  -3   1  -2 5304.47  122.39
   3  -1   2 5327.27  123.19
   3  -1   2 5166.88  122.19
   3  -1   2 5233.88  121.99
   3  -1   2 5142.09  123.39
   3  -1   2 5014.70  122.99
   3  -1   2 5422.16  122.19
  -4   1  -2 1243.58   29.30
  -4   1  -2 1256.47   29.10
  -4   1  -2 1274.67   29.60
  -4   1  -2 1284.47   29.20
  -4   1  -2 1259.97   29.20
  -4   1  -2 1304.87   29.40
   4  -1   2 1221.48   28.90
   4  -1   2 1220.78   29.40
   4  -1   2 1248.78   29.40
   4  -1   2 1295.77   29.20
  -5   1  -2   10.70    1.30
  -5   1  -2   10.40    0.80
  -5   1  -2    7.50    1.10
  -5   1  -2    8.60    1.10
  -5   1  -2    9.10    1.20
   5  -1   2    8.70    1.30
   5  -1   2    7.10    0.90
  -6   1  -2   55.29    2.90
  -6   1  -2   52.69    1.80
  -6   1  -2   48.60    2.30
  -6   1  -2   53.49    2.30
  -6   1  -2   54.19    2.40
  -6   1  -2   49.20    2.20
   6  -1   2   51.79    1.90
   6  -1   2   52.99    2.70
  -7   1  -2  660.53   16.30
  -7   1  -2  659.93   16.20
  -7   1  -2  657.33   15.40
  -7   1  -2  651.13   16.10
  -7   1  -2  664.03   16.70
  -7   1  -2  639.14   16.10
   7  -1   2  649.43   15.50
   7  -1   2  678.23   16.70
  -8   1  -2   14.70    2.40
  -8   1  -2   15.30    1.10
  -8   1  -2   16.00    1.70
  -8   1  -2   16.50    2.00
  -8   1  -2   14.60    1.80
  -8   1  -2   16.20    1.80
   8  -1   2   20.70    2.50
   8  -1   2   14.90    1.20
  -9   1  -2    2.20    0.70
  -9   1  -2    4.00    1.90
  -9   1  -2    5.20    1.40
  -9   1  -2    4.30    1.40
  -9   1  -2    2.50    1.40
  -9   1  -2    1.20    1.20
   9  -1   2    3.50    0.70
   9  -1   2    2.80    1.90
 -10   1  -2    7.20    2.30
 -10   1  -2    2.60    1.70
 -10   1  -2    2.60    1.60
 -10   1  -2    7.70    1.80
  10  -1   2    5.50    2.10
 -11   1  -2    2.40    1.90
 -11   1  -2    5.60    1.90
 -11   1  -2    4.10    1.90
 -11   1  -2    8.30    2.90
  11  -1   2    4.30    2.60
 -12   1  -2    0.60    2.30
 -12   1  -2   -0.80    1.90
 -12   1  -2   -1.00    1.70
 -12   1  -2    3.20    2.60
  12  -1   2    2.30    2.80
 -13   1  -2   -1.40    2.20
 -13   1  -2    4.20    2.40
 -13   1  -2    1.70    3.20
 -13   1  -2   -0.80    2.10
  13  -1   2    1.70    2.80
 -14   1  -2    2.00    2.60
 -14   1  -2    5.50    3.00
 -14   1  -2    1.40    2.50
 -14   1  -2    7.80    3.80
  14  -1   2    9.60    3.40
 -15   1  -2    5.10    3.40
 -15   1  -2    2.60    2.70
 -15   1  -2   -0.80    2.80
 -15   1  -2   -2.00    2.40
  15  -1   2    4.10    3.30
  15   0  -2    3.50    3.30
 -15   0   2    7.50    3.80
 -15   0   2    4.00    2.80
 -15   0   2    0.40    2.50
 -15   0   2   -7.20    2.90
  14   0  -2    1.30    3.00
 -14   0   2    2.80    2.70
 -14   0   2   -1.10    2.90
 -14   0   2    6.80    3.50
 -14   0   2    5.50    2.50
  13   0  -2    2.50    2.90
 -13   0   2    8.20    3.50
 -13   0   2    0.80    2.60
 -13   0   2    6.50    2.30
 -13   0   2    4.50    2.60
  12   0  -2   31.10    3.80
 -12   0   2   29.00    3.40
 -12   0   2   30.60    3.20
 -12   0   2   36.60    3.70
 -12   0   2   28.60    4.00
  11   0  -2   -2.00    2.20
 -11   0   2    4.50    2.20
 -11   0   2    2.30    1.90
 -11   0   2    4.60    2.80
 -11   0   2    3.80    1.80
  10   0  -2   72.19    4.30
 -10   0   2   79.19    3.90
 -10   0   2   80.19    4.50
 -10   0   2   70.49    4.10
 -10   0   2   72.79    3.40
   9   0  -2    2.50    0.60
   9   0  -2    1.10    1.30
   9   0  -2   -0.70    1.60
  -9   0   2    0.60    1.90
  -9   0   2    1.80    1.40
  -9   0   2   -0.30    1.50
  -9   0   2    1.30    1.30
  -9   0   2    1.30    1.60
   8   0  -2   99.99    4.40
   8   0  -2  105.49    4.10
   8   0  -2  100.29    2.80
  -8   0   2   94.59    3.90
  -8   0   2   98.29    3.80
  -8   0   2  108.29    4.50
  -8   0   2   99.09    3.80
  -8   0   2   95.99    3.60
   7   0  -2    0.80    0.50
   7   0  -2    3.10    1.50
   7   0  -2    3.00    1.20
  -7   0   2    1.80    1.00
  -7   0   2   -0.10    1.00
  -7   0   2    1.50    1.30
  -7   0   2    0.50    1.60
  -7   0   2    2.10    1.20
   6   0  -2   10.80    0.90
   6   0  -2   12.20    1.70
   6   0  -2   12.40    1.60
  -6   0   2   13.60    1.60
  -6   0   2   11.20    1.90
  -6   0   2   13.60    1.60
  -6   0   2   11.80    1.50
  -6   0   2   12.60    1.50
   5   0  -2   93.39    3.50
   5   0  -2   93.29    3.20
   5   0  -2   91.39    2.40
  -5   0   2   91.89    3.00
  -5   0   2   95.29    3.30
  -5   0   2   91.59    3.10
  -5   0   2   94.39    3.10
  -5   0   2   88.19    3.40
   4   0  -2    3.90    0.90
   4   0  -2    4.20    0.70
   4   0  -2    4.60    0.80
   4   0  -2    1.90    1.10
   4   0  -2    5.00    0.50
   4   0  -2    5.10    1.00
  -4   0   2    5.10    0.90
  -4   0   2    4.30    0.70
  -4   0   2    2.90    0.90
  -4   0   2    3.90    0.90
  -4   0   2    5.60    1.20
   3   0  -2 1360.76   32.00
   3   0  -2 1421.66   31.80
   3   0  -2 1400.26   31.90
   3   0  -2 1351.96   32.10
   3   0  -2 1371.96   32.00
   3   0  -2 1433.16   32.00
  -3   0   2 1380.26   32.90
  -3   0   2 1445.06   32.00
  -3   0   2 1361.26   32.10
  -3   0   2 1366.36   32.50
  -3   0   2 1344.17   32.00
  -3   0   2 1362.16   32.70
   2   0  -2  828.22   19.60
   2   0  -2  854.41   19.50
   2   0  -2  847.72   19.70
   2   0  -2  871.71   19.70
   2   0  -2  871.01   19.60
   2   0  -2  840.52   19.60
   2   0  -2  850.31   19.50
  -2   0   2  806.42   19.70
  -2   0   2  846.02   19.60
  -2   0   2  839.82   19.70
  -2   0   2  822.02   19.60
  -2   0   2  869.21   19.40
  -2   0   2  822.92   19.50
   1   0  -2  506.85   11.50
   1   0  -2  498.65   11.40
   1   0  -2  490.45   11.60
   1   0  -2  489.85   11.40
   1   0  -2  497.15   11.70
  -1   0   2  488.75   11.50
  -1   0   2  485.35   11.60
  -1   0   2  505.35   11.60
  -1   0   2  506.15   11.40
  -1   0   2  483.05   11.70
   0   0  -2   47.10    1.50
   0   0  -2   44.50    1.60
   0   0  -2   46.20    1.40
   0   0   2   45.50    1.40
   0   0   2   45.90    1.30
   0   0   2   47.40    1.30
  -1   0  -2  386.16    9.10
  -1   0  -2  378.06    9.10
  -1   0  -2  393.56    9.00
  -1   0  -2  387.36    9.10
  -1   0  -2  378.86    9.00
  -1   0  -2  387.56    8.90
   1   0   2  384.56    9.00
   1   0   2  378.26    9.10
   1   0   2  394.96    9.10
   1   0   2  373.56    8.90
  -2   0  -2 1032.30   25.30
  -2   0  -2 1098.79   25.00
  -2   0  -2 1109.59   25.40
  -2   0  -2 1063.29   24.90
  -2   0  -2 1093.19   24.80
  -2   0  -2 1129.59   25.80
   2   0   2 1084.09   24.90
   2   0   2 1071.99   24.80
   2   0   2 1077.79   24.90
   2   0   2 1054.79   25.00
   2   0   2 1064.39   24.90
  -3   0  -2  191.88    4.90
  -3   0  -2  180.58    5.00
  -3   0  -2  183.58    4.80
  -3   0  -2  187.58    4.80
  -3   0  -2  186.78    4.70
  -3   0  -2  186.28    5.00
   3   0   2  185.38    4.70
   3   0   2  178.58    4.90
   3   0   2  179.68    4.80
   3   0   2  184.98    5.00
   3   0   2  189.18    5.00
   3   0   2  180.78    4.90
  -4   0  -2   19.50    1.40
  -4   0  -2   19.20    1.10
  -4   0  -2   19.10    1.50
  -4   0  -2   20.60    1.40
  -4   0  -2   21.00    1.70
  -4   0  -2   17.60    1.20
   4   0   2   18.60    1.60
   4   0   2   18.50    1.20
   4   0   2   15.00    1.30
  -5   0  -2   17.90    1.50
  -5   0  -2   19.10    1.50
  -5   0  -2   18.90    1.50
  -5   0  -2   15.20    1.60
  -5   0  -2   20.60    1.20
   5   0   2   15.80    1.70
   5   0   2   16.20    1.50
   5   0   2   17.50    1.20
  -6   0  -2  342.27    8.70
  -6   0  -2  334.37    8.90
  -6   0  -2  348.87    8.30
  -6   0  -2  345.27    8.80
  -6   0  -2  314.57    8.90
   6   0   2  338.07    9.20
   6   0   2  329.77    8.80
   6   0   2  331.37    8.30
  -7   0  -2   10.50    1.60
  -7   0  -2   14.20    1.10
  -7   0  -2   11.20    1.50
  -7   0  -2   14.00    1.90
  -7   0  -2   11.30    2.10
  -7   0  -2   13.00    1.90
   7   0   2   14.20    1.80
   7   0   2   10.90    1.20
   7   0   2    7.20    1.60
  -8   0  -2   45.30    2.60
  -8   0  -2   46.50    2.60
  -8   0  -2   46.80    1.80
  -8   0  -2   45.90    2.80
  -8   0  -2   46.20    2.70
  -8   0  -2   43.70    2.80
   8   0   2   42.10    3.20
   8   0   2   51.09    2.80
   8   0   2   41.90    2.00
  -9   0  -2   21.90    2.30
  -9   0  -2   21.60    2.40
  -9   0  -2   25.90    2.30
  -9   0  -2   29.30    2.90
  -9   0  -2   25.00    1.50
  -9   0  -2   28.70    2.50
   9   0   2   31.40    3.20
   9   0   2   24.20    2.40
 -10   0  -2   20.60    2.70
 -10   0  -2   18.80    2.40
 -10   0  -2   20.00    3.20
 -10   0  -2   17.50    2.40
  10   0   2   16.30    2.70
 -11   0  -2    0.50    1.90
 -11   0  -2   -0.20    2.60
 -11   0  -2    5.50    2.10
 -11   0  -2    1.10    1.90
  11   0   2    1.10    2.50
 -12   0  -2   -1.20    1.80
 -12   0  -2   -1.10    2.10
 -12   0  -2    2.10    2.20
 -12   0  -2   -0.50    2.90
  12   0   2   -1.60    2.80
 -13   0  -2    2.50    2.10
 -13   0  -2   -1.90    2.30
 -13   0  -2    2.10    3.00
 -13   0  -2    4.90    2.70
  13   0   2    6.70    3.10
 -14   0  -2    1.30    3.00
 -14   0  -2   -4.80    2.30
 -14   0  -2    3.00    2.90
 -14   0  -2   -1.90    2.30
  14   0   2   -0.80    2.80
 -15   0  -2   -1.80    2.20
 -15   0  -2    5.40    3.80
 -15   0  -2   -2.40    2.50
 -15   0  -2   -4.10    2.70
  15   0   2   -0.30    3.50
  16  -1  -2    6.90    3.90
 -16   1   2    0.80    2.20
 -16   1   2   -7.90    2.70
 -16   1   2   10.40    4.20
 -16   1   2    4.80    3.00
  15  -1  -2    6.00    3.80
 -15   1   2    0.00    2.50
 -15   1   2    6.80    3.90
 -15   1   2   -1.80    2.70
 -15   1   2    4.00    2.40
  14  -1  -2   -0.70    2.90
 -14   1   2    1.30    2.10
 -14   1   2    3.70    3.60
 -14   1   2   -3.20    2.40
 -14   1   2   -2.00    2.30
  13  -1  -2    4.80    2.80
 -13   1   2    3.70    2.10
 -13   1   2    3.20    2.60
 -13   1   2    2.50    2.50
 -13   1   2   -1.90    3.30
  12  -1  -2   16.70    3.50
 -12   1   2   17.80    2.80
 -12   1   2   17.70    3.30
 -12   1   2   18.80    2.80
 -12   1   2   18.60    2.40
  11  -1  -2   16.30    2.90
 -11   1   2   12.60    2.40
 -11   1   2   18.00    3.50
 -11   1   2   16.80    2.40
 -11   1   2   19.60    2.20
  10  -1  -2   23.70    3.00
  10  -1  -2   19.10    2.50
 -10   1   2   22.70    2.10
 -10   1   2   17.40    2.20
 -10   1   2   22.20    2.80
 -10   1   2   27.00    3.20
   9  -1  -2   70.39    3.60
   9  -1  -2   77.29    4.20
  -9   1   2   79.19    4.20
  -9   1   2   72.59    3.50
  -9   1   2   65.79    3.30
  -9   1   2   77.19    3.20
  -9   1   2   74.79    3.50
   8  -1  -2   36.00    2.80
   8  -1  -2   39.10    2.60
  -8   1   2   38.20    2.30
  -8   1   2   41.30    2.70
  -8   1   2   38.70    2.80
  -8   1   2   44.10    2.30
  -8   1   2   40.20    2.40
   7  -1  -2   33.60    2.50
   7  -1  -2   30.30    2.20
  -7   1   2   31.30    2.00
  -7   1   2   29.20    2.60
  -7   1   2   29.60    2.10
  -7   1   2   31.80    2.30
  -7   1   2   34.60    1.90
   6  -1  -2  258.57    7.40
   6  -1  -2  269.17    7.20
  -6   1   2  267.77    6.80
  -6   1   2  247.38    7.10
  -6   1   2  257.77    6.90
  -6   1   2  256.97    7.00
  -6   1   2  254.57    7.50
   5  -1  -2   19.30    1.60
   5  -1  -2   17.30    1.70
   5  -1  -2   17.30    1.30
  -5   1   2   19.30    1.30
  -5   1   2   15.90    1.60
  -5   1   2   20.60    1.40
  -5   1   2   20.40    1.20
  -5   1   2   18.20    1.60
   4  -1  -2   85.69    2.90
   4  -1  -2   79.79    2.90
   4  -1  -2   87.69    2.70
   4  -1  -2   83.69    2.50
   4  -1  -2   80.69    3.00
   4  -1  -2   81.89    2.80
  -4   1   2   81.39    2.70
  -4   1   2   88.19    2.90
  -4   1   2   82.99    3.10
  -4   1   2   76.69    2.60
  -4   1   2   80.39    2.40
   3  -1  -2   19.30    1.50
   3  -1  -2   19.90    1.30
   3  -1  -2   23.50    1.40
   3  -1  -2   22.10    1.60
   3  -1  -2   21.90    1.00
   3  -1  -2   21.80    0.80
   3  -1  -2   21.00    1.20
  -3   1   2   21.40    1.20
  -3   1   2   19.20    1.80
  -3   1   2   22.80    1.40
  -3   1   2   20.60    1.40
  -3   1   2   21.70    1.50
  -3   1   2   20.80    0.80
  -3   1   2   21.00    1.00
   2  -1  -2   68.39    2.00
   2  -1  -2   72.29    1.90
   2  -1  -2   68.59    2.40
   2  -1  -2   73.19    1.80
   2  -1  -2   71.49    2.30
  -2   1   2   72.39    1.80
  -2   1   2   70.99    1.90
  -2   1   2   76.29    2.30
  -2   1   2   68.69    2.00
  -2   1   2   67.59    2.40
  -2   1   2   68.09    2.30
   1  -1  -2   10.10    0.60
   1  -1  -2    9.90    0.90
   1  -1  -2    9.60    0.40
   1  -1  -2    9.10    1.00
   1  -1  -2    9.70    0.90
   1  -1  -2   10.10    0.60
  -1   1   2   10.20    0.60
  -1   1   2    9.60    0.80
  -1   1   2   10.70    0.80
  -1   1   2   10.00    0.60
  -1   1   2    8.60    0.80
  -1   1   2    9.40    0.40
  -1   1   2   10.50    1.00
   0  -1  -2    4.90    0.70
   0  -1  -2    5.40    0.90
   0  -1  -2    4.10    0.50
   0  -1  -2    5.10    0.60
   0  -1  -2    5.00    0.50
   0  -1  -2    6.50    0.80
   0   1   2    5.80    0.60
   0   1   2    5.40    0.50
   0   1   2    5.00    0.60
   0   1   2    3.70    0.70
   0   1   2    5.40    1.00
   0   1   2    4.80    0.70
  -1  -1  -2  414.86    9.90
  -1  -1  -2  423.26   10.10
  -1  -1  -2  432.26   10.30
  -1  -1  -2  424.16   10.20
  -1  -1  -2  424.86   10.50
  -1  -1  -2  432.16   10.00
  -1  -1  -2  429.46   10.10
   1   1   2  429.06    9.90
   1   1   2  422.96   10.00
   1   1   2  418.06   10.00
   1   1   2  409.66   10.20
   1   1   2  418.56   10.20
   1   1   2  421.46   10.10
  -2  -1  -2   10.50    1.20
  -2  -1  -2    6.50    1.00
  -2  -1  -2    8.10    1.20
  -2  -1  -2    9.60    0.90
  -2  -1  -2   11.10    1.20
  -2  -1  -2    8.30    1.10
   2   1   2    7.30    0.80
   2   1   2    8.20    1.10
   2   1   2    7.60    1.00
   2   1   2    8.80    1.10
   2   1   2    7.40    1.10
   2   1   2    8.90    1.20
  -3  -1  -2  957.30   22.30
  -3  -1  -2  965.30   22.20
  -3  -1  -2  943.51   22.30
  -3  -1  -2  954.80   22.40
  -3  -1  -2  965.30   22.00
  -3  -1  -2  937.31   22.00
   3   1   2  943.01   22.30
   3   1   2  962.30   22.30
   3   1   2  868.01   22.00
   3   1   2  951.40   22.30
   3   1   2  947.51   22.00
  -4  -1  -2  151.58    4.00
  -4  -1  -2  139.39    4.20
  -4  -1  -2  139.59    4.50
  -4  -1  -2  146.69    4.10
  -4  -1  -2  141.59    4.30
   4   1   2  145.99    4.00
   4   1   2  142.49    4.30
   4   1   2  145.79    4.50
  -5  -1  -2   42.90    1.80
  -5  -1  -2   41.30    2.10
  -5  -1  -2   37.80    2.20
  -5  -1  -2   41.60    2.00
  -5  -1  -2   40.60    2.40
   5   1   2   38.90    2.20
   5   1   2   38.20    1.90
   5   1   2   41.70    2.40
  -6  -1  -2  574.74   14.90
  -6  -1  -2  606.54   14.80
  -6  -1  -2  609.64   14.70
  -6  -1  -2  579.34   15.10
  -6  -1  -2  597.34   14.30
   6   1   2  621.04   15.00
   6   1   2  588.24   15.20
  -7  -1  -2   62.69    3.10
  -7  -1  -2   61.59    2.90
  -7  -1  -2   65.99    3.00
  -7  -1  -2   56.59    2.90
  -7  -1  -2   60.49    2.30
   7   1   2   64.29    3.10
   7   1   2   64.09    3.20
  -8  -1  -2    0.80    1.40
  -8  -1  -2    0.30    0.80
  -8  -1  -2    0.60    1.30
  -8  -1  -2   -1.80    1.20
  -8  -1  -2    1.00    1.70
  -8  -1  -2    2.00    1.30
   8   1   2   -0.50    1.20
   8   1   2   -0.30    1.80
  -9  -1  -2    2.10    2.00
  -9  -1  -2    1.10    1.60
  -9  -1  -2    2.80    1.60
  -9  -1  -2    2.80    1.60
   9   1   2    1.30    1.90
 -10  -1  -2   13.40    2.90
 -10  -1  -2   11.20    2.40
 -10  -1  -2    9.20    2.10
 -10  -1  -2   13.30    2.40
  10   1   2   10.60    2.60
 -11  -1  -2   37.60    3.30
 -11  -1  -2   39.80    3.30
 -11  -1  -2   40.10    3.40
 -11  -1  -2   44.20    4.00
  11   1   2   45.50    4.30
 -12  -1  -2    1.10    2.40
 -12  -1  -2   -3.20    1.90
 -12  -1  -2    3.00    2.60
 -12  -1  -2    1.50    3.00
  12   1   2    0.00    2.90
 -13  -1  -2   17.10    3.30
 -13  -1  -2    4.10    2.70
 -13  -1  -2   14.10    3.60
 -13  -1  -2   13.40    2.70
  13   1   2   14.90    3.50
 -14  -1  -2    1.50    2.50
 -14  -1  -2    2.70    2.90
 -14  -1  -2    4.30    2.80
 -14  -1  -2    1.90    3.40
  14   1   2    0.70    3.00
 -16   2   2    3.50    3.10
 -16   2   2    3.20    2.40
 -16   2   2   -5.70    2.80
 -16   2   2    6.40    4.10
 -15   2   2   -1.90    2.80
 -15   2   2    4.30    2.30
 -15   2   2   -3.10    2.50
 -15   2   2    5.80    3.90
  14  -2  -2    7.00    3.20
 -14   2   2    2.40    2.70
 -14   2   2    8.10    3.80
 -14   2   2    4.70    2.80
 -14   2   2    7.30    2.20
  13  -2  -2   41.80    4.30
 -13   2   2   33.60    3.90
 -13   2   2   30.60    3.00
 -13   2   2   35.20    4.60
 -13   2   2   36.70    3.30
  12  -2  -2  100.09    5.50
 -12   2   2   96.09    4.50
 -12   2   2   99.99    4.20
 -12   2   2   87.59    4.80
 -12   2   2  105.49    5.90
  11  -2  -2    4.40    2.30
 -11   2   2    2.70    1.50
 -11   2   2    3.70    2.00
 -11   2   2    3.80    1.90
 -11   2   2    5.30    2.70
  10  -2  -2  138.79    5.80
 -10   2   2  141.29    6.00
 -10   2   2  141.79    5.40
 -10   2   2  145.89    5.10
 -10   2   2  140.29    4.70
 -10   2   2  142.79    5.00
   9  -2  -2    2.40    1.70
  -9   2   2    0.80    1.20
  -9   2   2   -0.80    1.80
  -9   2   2   -1.20    1.10
  -9   2   2    1.30    1.10
  -9   2   2    1.80    1.40
   8  -2  -2   13.10    2.10
  -8   2   2   12.80    1.70
  -8   2   2   12.60    1.70
  -8   2   2   12.80    2.20
  -8   2   2   12.20    1.60
  -8   2   2   11.40    1.50
   7  -2  -2  528.95   13.80
  -7   2   2  519.15   12.80
  -7   2   2  512.25   13.10
  -7   2   2  526.15   13.90
  -7   2   2  530.55   13.40
  -7   2   2  531.85   13.10
   6  -2  -2   39.30    1.70
   6  -2  -2   36.00    2.40
  -6   2   2   34.60    2.00
  -6   2   2   31.70    2.40
  -6   2   2   37.40    1.60
  -6   2   2   34.90    2.20
  -6   2   2   37.50    1.90
   5  -2  -2  219.18    5.40
  -5   2   2  216.58    5.70
  -5   2   2  220.18    5.80
  -5   2   2  214.98    5.40
  -5   2   2  206.58    6.30
  -5   2   2  207.18    5.90
   4  -2  -2  128.39    5.30
   4  -2  -2  133.69    3.10
   4  -2  -2  129.89    3.50
   4  -2  -2  111.59    3.90
   4  -2  -2  132.29    3.30
   4  -2  -2  129.09    3.70
  -4   2   2  132.99    3.30
  -4   2   2  127.99    3.90
  -4   2   2  131.19    3.80
  -4   2   2  132.59    3.20
  -4   2   2  126.69    4.30
  -4   2   2  126.09    3.60
   3  -2  -2 1486.15   34.30
   3  -2  -2 1494.45   34.50
   3  -2  -2 1425.16   34.30
   3  -2  -2 1561.64   34.10
   3  -2  -2 1465.95   34.60
  -3   2   2 1510.45   34.10
  -3   2   2 1443.16   34.70
  -3   2   2 1511.15   34.40
  -3   2   2 1433.86   34.70
  -3   2   2 1511.25   35.10
  -3   2   2 1460.05   34.40
   2  -2  -2  747.23   18.00
   2  -2  -2  771.52   17.70
   2  -2  -2  755.42   18.20
   2  -2  -2  770.12   17.60
  -2   2   2  784.62   17.50
  -2   2   2  774.42   18.30
  -2   2   2  739.73   18.00
  -2   2   2  767.72   17.90
  -2   2   2  761.72   17.60
  -2   2   2  726.93   18.00
   1  -2  -2  423.66    9.80
   1  -2  -2  427.86    9.80
   1  -2  -2  430.76   10.30
   1  -2  -2  422.16   10.00
   1  -2  -2  431.66   10.40
   1  -2  -2  421.26   10.60
  -1   2   2  427.36   10.30
  -1   2   2  399.46   10.20
  -1   2   2  416.46   10.60
  -1   2   2  428.16    9.80
  -1   2   2  431.06   10.00
  -1   2   2  420.66    9.80
  -1   2   2  415.66   10.40
   0  -2  -2  444.86   10.80
   0  -2  -2  447.16   10.40
   0  -2  -2  438.26   10.60
   0  -2  -2  428.06   10.30
   0  -2  -2  423.86   10.90
   0  -2  -2  443.96   10.10
   0  -2  -2  442.86   10.50
   0   2   2  396.46   10.40
   0   2   2  436.16   10.70
   0   2   2  438.16   10.70
   0   2   2  445.96   10.50
   0   2   2  442.16   10.90
   0   2   2  436.96   10.30
  -1  -2  -2 2351.36   64.29
  -1  -2  -2 2800.32   63.89
  -1  -2  -2 2815.82   63.49
  -1  -2  -2 2843.52   63.89
  -1  -2  -2 2787.82   62.69
  -1  -2  -2 2623.24   64.49
  -1  -2  -2 2770.72   62.99
   1   2   2 2923.41   64.19
   1   2   2 2780.82   63.89
   1   2   2 2709.23   63.29
   1   2   2 2688.33   63.79
   1   2   2 2878.51   63.39
   1   2   2 2549.54   63.49
   1   2   2 2801.52   63.79
  -2  -2  -2 1029.30   23.30
  -2  -2  -2 1020.70   22.90
  -2  -2  -2 1045.40   23.50
  -2  -2  -2  992.90   23.20
  -2  -2  -2  881.91   23.00
  -2  -2  -2  999.90   23.20
  -2  -2  -2  998.90   23.70
   2   2   2  983.50   23.20
   2   2   2 1003.30   23.40
   2   2   2 1038.10   23.40
   2   2   2 1001.30   22.90
   2   2   2  856.01   23.00
  -3  -2  -2  244.38    6.10
  -3  -2  -2  231.18    6.00
  -3  -2  -2  236.78    6.60
  -3  -2  -2  233.18    6.30
  -3  -2  -2  237.98    6.30
   3   2   2  234.48    6.50
   3   2   2  226.38    6.40
   3   2   2  233.48    6.40
  -4  -2  -2   16.40    1.60
  -4  -2  -2   18.30    1.30
  -4  -2  -2   13.90    1.70
  -4  -2  -2   15.60    1.40
   4   2   2   13.50    1.60
   4   2   2   17.50    1.70
  -5  -2  -2    2.00    1.20
  -5  -2  -2    0.40    1.30
  -5  -2  -2    0.10    1.00
  -5  -2  -2    2.60    0.80
  -5  -2  -2    1.10    1.10
   5   2   2    0.60    1.00
   5   2   2    0.60    1.20
  -6  -2  -2   93.39    3.10
  -6  -2  -2  101.69    4.20
  -6  -2  -2   90.99    3.60
  -6  -2  -2   99.19    3.60
  -6  -2  -2  100.99    3.80
   6   2   2  104.99    4.20
   6   2   2   97.49    3.80
  -7  -2  -2   32.40    1.90
  -7  -2  -2   33.40    2.20
  -7  -2  -2   32.00    2.40
  -7  -2  -2   34.50    2.80
  -7  -2  -2   33.00    2.40
   7   2   2   32.50    2.40
   7   2   2   30.60    2.70
  -8  -2  -2   -1.00    1.80
  -8  -2  -2   -0.10    1.40
  -8  -2  -2    1.00    1.60
  -8  -2  -2    0.30    1.30
  -8  -2  -2    0.70    1.70
  -8  -2  -2    1.10    1.00
   8   2   2    0.50    1.70
   8   2   2   -0.60    1.20
  -9  -2  -2   20.50    3.10
  -9  -2  -2   27.50    2.60
  -9  -2  -2   19.90    2.80
  -9  -2  -2   17.70    2.50
   9   2   2   17.80    2.70
 -10  -2  -2   23.00    3.10
 -10  -2  -2   19.30    2.80
 -10  -2  -2   21.20    2.90
 -10  -2  -2   16.40    3.20
  10   2   2   19.30    3.20
 -11  -2  -2   20.00    3.00
 -11  -2  -2   24.00    3.20
 -11  -2  -2   24.00    3.60
 -11  -2  -2   26.80    3.40
  11   2   2   31.40    4.20
 -12  -2  -2   24.40    3.90
 -12  -2  -2   20.00    3.10
 -12  -2  -2   18.60    3.10
 -12  -2  -2   17.80    3.10
  12   2   2   21.20    3.60
 -13  -2  -2    1.50    2.40
 -13  -2  -2    3.10    3.20
 -13  -2  -2   -4.30    2.50
 -13  -2  -2    5.50    2.90
  13   2   2   -0.30    2.90
 -14  -2  -2   -2.20    2.90
 -14  -2  -2   15.40    3.60
 -14  -2  -2    9.00    3.70
 -14  -2  -2    3.30    2.60
  14   2   2   12.00    3.70
 -16   3   2    0.40    2.90
 -16   3   2    4.30    2.70
 -16   3   2    9.10    4.40
 -15   3   2    3.10    2.50
 -15   3   2   -2.20    2.50
 -15   3   2    1.30    2.00
 -15   3   2    6.20    4.10
 -14   3   2    9.00    2.90
 -14   3   2   11.20    4.10
 -14   3   2    6.10    2.70
 -14   3   2    5.10    2.10
 -13   3   2    1.80    1.70
 -13   3   2   -0.30    2.20
 -13   3   2    5.20    2.50
 -13   3   2   -0.40    2.80
 -12   3   2   40.00    3.10
 -12   3   2   42.70    4.10
 -12   3   2   37.70    2.80
 -12   3   2   39.40    3.70
 -11   3   2    4.90    1.90
 -11   3   2    2.60    2.60
 -11   3   2    3.50    1.30
 -11   3   2    4.20    1.90
  10  -3  -2    0.50    1.30
 -10   3   2    0.50    1.50
 -10   3   2    4.40    2.20
 -10   3   2    0.50    1.20
 -10   3   2    2.10    1.10
 -10   3   2    1.60    1.40
   9  -3  -2   95.59    4.10
  -9   3   2   97.69    3.80
  -9   3   2  101.59    3.80
  -9   3   2  101.79    4.70
  -9   3   2  101.39    3.50
  -9   3   2   99.19    4.20
   8  -3  -2   62.29    3.10
  -8   3   2   58.29    2.80
  -8   3   2   60.39    2.40
  -8   3   2   60.39    2.70
  -8   3   2   60.39    3.10
  -8   3   2   66.09    3.80
   7  -3  -2  184.38    5.00
   7  -3  -2  183.08    5.60
  -7   3   2  186.78    5.70
  -7   3   2  178.08    5.30
  -7   3   2  185.88    5.30
  -7   3   2  175.78    4.80
  -7   3   2  169.78    6.10
   6  -3  -2  358.06    8.70
   6  -3  -2  362.76    9.40
  -6   3   2  351.96    8.30
  -6   3   2  359.76    9.40
  -6   3   2  347.47    9.00
  -6   3   2  356.96    9.10
  -6   3   2  342.77    9.90
  -6   3   2  360.46    8.60
   5  -3  -2  140.89    3.60
   5  -3  -2  138.19    4.30
  -5   3   2  132.19    4.70
  -5   3   2  134.49    3.90
  -5   3   2  144.29    4.20
  -5   3   2  135.99    3.50
  -5   3   2  135.49    4.30
  -5   3   2  136.79    3.50
   4  -3  -2   12.80    1.00
   4  -3  -2   12.40    1.50
   4  -3  -2   13.90    0.70
   4  -3  -2   12.20    0.80
  -4   3   2   12.10    1.00
  -4   3   2   13.20    1.40
  -4   3   2   13.80    1.50
  -4   3   2   10.20    1.90
  -4   3   2   12.80    0.90
  -4   3   2   11.30    0.60
   3  -3  -2  657.03   15.00
   3  -3  -2  625.74   15.50
   3  -3  -2  675.03   15.10
   3  -3  -2  647.84   15.60
   3  -3  -2  618.14   15.80
  -3   3   2  633.14   16.10
  -3   3   2  664.43   15.60
  -3   3   2  650.63   14.80
  -3   3   2  629.64   15.60
  -3   3   2  653.13   15.10
  -3   3   2  657.73   15.00
   2  -3  -2   21.60    1.30
   2  -3  -2   16.20    0.90
   2  -3  -2   17.10    1.70
   2  -3  -2   12.80    1.80
   2  -3  -2   15.20    1.70
   2  -3  -2   17.20    0.70
  -2   3   2   18.50    0.80
  -2   3   2   13.50    2.00
  -2   3   2   14.90    1.50
  -2   3   2   18.00    1.10
  -2   3   2   14.50    1.70
  -2   3   2   15.70    0.90
  -2   3   2   13.30    1.40
   1  -3  -2   29.30    1.80
   1  -3  -2   29.20    2.10
   1  -3  -2   27.70    2.00
   1  -3  -2   27.30    2.00
   1  -3  -2   27.50    1.20
   1  -3  -2   35.90    1.60
  -1   3   2   26.10    1.90
  -1   3   2   26.90    2.00
  -1   3   2   27.40    2.20
  -1   3   2   33.40    1.60
  -1   3   2   29.10    2.00
  -1   3   2   29.90    1.20
   0  -3  -2  415.66    9.40
   0  -3  -2  415.86   10.40
   0  -3  -2  410.66    9.90
   0  -3  -2  416.36    9.80
   0  -3  -2  403.26   10.10
   0  -3  -2  398.46   10.40
   0  -3  -2  409.76   10.20
   0   3   2  404.86   10.30
   0   3   2  404.46    9.50
   0   3   2  375.36    9.90
   0   3   2  405.76   10.20
   0   3   2  408.56    9.80
   0   3   2  405.06   10.10
   0   3   2  399.76   10.50
  -1  -3  -2  387.96   10.00
  -1  -3  -2  381.56    9.10
  -1  -3  -2  404.96    9.90
  -1  -3  -2  381.26    9.70
  -1  -3  -2  379.66   10.10
  -1  -3  -2  397.66    9.60
  -1  -3  -2  390.06    9.50
   1   3   2  384.16    9.20
   1   3   2  384.96    9.80
   1   3   2  389.36    9.80
   1   3   2  374.16   10.10
   1   3   2  383.66    9.90
  -2  -3  -2  119.69    4.00
  -2  -3  -2  114.29    4.20
  -2  -3  -2  117.29    3.50
  -2  -3  -2  106.99    3.60
  -2  -3  -2  118.19    3.30
  -2  -3  -2  122.29    3.80
   2   3   2  117.39    3.30
   2   3   2  118.99    3.80
   2   3   2  109.89    3.80
   2   3   2  125.39    3.90
  -3  -3  -2    1.90    1.10
  -3  -3  -2    1.40    0.80
  -3  -3  -2    2.30    1.30
  -3  -3  -2    2.00    0.80
  -3  -3  -2    1.40    1.00
   3   3   2    1.20    1.10
   3   3   2    3.20    1.30
   3   3   2    0.70    1.00
  -4  -3  -2   21.60    1.90
  -4  -3  -2   23.50    1.70
  -4  -3  -2   20.40    1.80
  -4  -3  -2   24.10    1.70
  -4  -3  -2   22.20    2.40
   4   3   2   22.60    2.10
   4   3   2   22.40    2.00
  -5  -3  -2  150.58    4.50
  -5  -3  -2  146.79    4.90
  -5  -3  -2  156.58    4.70
  -5  -3  -2  151.68    5.40
  -5  -3  -2  155.08    4.90
   5   3   2  152.58    5.10
   5   3   2  151.08    5.20
  -6  -3  -2    0.30    1.30
  -6  -3  -2   -1.80    1.10
  -6  -3  -2    0.80    1.00
  -6  -3  -2   -1.70    1.20
   6   3   2   -0.20    1.50
   6   3   2    1.50    1.30
  -7  -3  -2   48.80    2.40
  -7  -3  -2   43.20    2.60
  -7  -3  -2   45.20    3.10
  -7  -3  -2   54.19    3.10
   7   3   2   46.80    3.10
   7   3   2   49.60    3.30
  -8  -3  -2    4.60    1.90
  -8  -3  -2    3.10    2.00
  -8  -3  -2    3.40    1.70
  -8  -3  -2    5.20    1.80
   8   3   2    5.60    2.40
   8   3   2    4.60    1.80
  -9  -3  -2   13.80    2.50
  -9  -3  -2   13.80    2.30
  -9  -3  -2   14.30    2.80
  -9  -3  -2   16.00    2.60
   9   3   2    7.50    2.50
 -10  -3  -2    4.50    2.50
 -10  -3  -2    1.20    2.60
 -10  -3  -2    3.10    2.10
 -10  -3  -2    3.60    2.20
  10   3   2    8.30    3.00
 -11  -3  -2    1.50    2.20
 -11  -3  -2    5.10    2.40
 -11  -3  -2    0.00    2.60
 -11  -3  -2    1.10    2.20
  11   3   2    3.00    2.70
 -12  -3  -2    6.00    2.50
 -12  -3  -2    3.30    2.40
 -12  -3  -2   -0.10    2.50
 -12  -3  -2   -0.70    3.10
  12   3   2   -0.10    3.20
 -13  -3  -2    4.10    2.70
 -13  -3  -2    9.90    3.20
 -13  -3  -2    5.70    3.40
 -13  -3  -2    0.80    2.70
  13   3   2    4.80    3.20
 -17   4   2   -4.10    2.70
 -17   4   2   13.30    4.70
 -17   4   2    1.30    2.80
 -16   4   2    5.20    2.70
 -16   4   2    8.20    4.10
 -16   4   2    2.60    3.00
 -15   4   2   -1.70    3.30
 -15   4   2   -0.90    1.90
 -15   4   2   -0.60    2.30
 -15   4   2   -1.70    2.60
 -14   4   2   56.69    5.50
 -14   4   2   46.80    3.30
 -14   4   2   41.70    4.30
 -14   4   2   47.40    3.70
 -13   4   2   13.90    2.90
 -13   4   2   18.40    3.80
 -13   4   2   12.70    2.00
 -13   4   2   15.70    2.80
 -12   4   2   56.49    4.50
 -12   4   2   64.79    3.10
 -12   4   2   58.59    3.50
 -12   4   2   60.39    4.00
 -11   4   2   23.30    2.60
 -11   4   2   20.90    3.20
 -11   4   2   22.20    2.00
 -11   4   2   21.90    2.80
  10  -4  -2   28.50    2.50
 -10   4   2   29.50    2.30
 -10   4   2   26.30    1.90
 -10   4   2   32.40    3.20
 -10   4   2   30.10    2.70
 -10   4   2   27.80    2.30
   9  -4  -2   16.70    2.10
  -9   4   2   17.50    1.90
  -9   4   2   20.40    2.30
  -9   4   2   19.10    1.50
  -9   4   2   19.50    3.00
  -9   4   2   16.90    1.90
   8  -4  -2   53.69    2.80
  -8   4   2   49.50    2.00
  -8   4   2   54.19    2.50
  -8   4   2   48.10    3.50
  -8   4   2   47.30    2.40
  -8   4   2   53.09    2.90
   7  -4  -2  440.86   10.50
   7  -4  -2  430.26   11.20
  -7   4   2  430.36   11.00
  -7   4   2  427.36   10.30
  -7   4   2  425.46   10.10
  -7   4   2  413.86   11.90
  -7   4   2  433.76   10.80
  -7   4   2  423.16   11.30
   6  -4  -2  124.89    4.10
   6  -4  -2  125.49    3.40
  -6   4   2  119.69    4.00
  -6   4   2  119.59    3.70
  -6   4   2  121.19    4.20
  -6   4   2  121.19    3.20
  -6   4   2  123.29    4.80
  -6   4   2  124.59    3.30
   5  -4  -2  373.76    9.60
   5  -4  -2  356.36    9.00
  -5   4   2  366.66    8.90
  -5   4   2  359.66    9.70
  -5   4   2  378.96    8.70
  -5   4   2  384.66    9.60
  -5   4   2  368.06    9.10
  -5   4   2  374.66   10.30
   4  -4  -2   14.20    0.90
   4  -4  -2   15.20    1.50
   4  -4  -2   16.10    1.00
  -4   4   2   14.80    1.00
  -4   4   2   15.30    0.70
  -4   4   2   13.70    1.50
  -4   4   2   13.50    2.00
  -4   4   2   14.80    1.70
  -4   4   2   12.70    1.00
  -4   4   2   16.20    1.70
  -4   4   2   15.70    0.70
   3  -4  -2   27.00    1.70
   3  -4  -2   30.70    1.40
   3  -4  -2   25.00    2.00
   3  -4  -2   27.30    1.00
  -3   4   2   27.60    1.10
  -3   4   2   26.90    1.80
  -3   4   2   31.20    1.00
  -3   4   2   27.20    1.90
  -3   4   2   21.80    2.30
  -3   4   2   26.30    1.40
   2  -4  -2  108.29    2.90
   2  -4  -2  105.79    3.10
   2  -4  -2  100.49    3.70
  -2   4   2  100.29    3.60
  -2   4   2  105.99    2.80
  -2   4   2   98.69    3.90
  -2   4   2  106.19    3.50
  -2   4   2  105.19    3.60
   1  -4  -2  151.08    4.40
   1  -4  -2  161.88    4.70
   1  -4  -2  158.58    4.30
   1  -4  -2  161.38    5.00
  -1   4   2  162.88    4.20
  -1   4   2  154.28    4.90
  -1   4   2  163.88    4.90
  -1   4   2  162.48    5.20
  -1   4   2  159.18    4.80
   0  -4  -2    9.30    1.30
   0  -4  -2    7.80    1.50
   0  -4  -2    8.30    0.60
   0  -4  -2    5.60    0.90
   0  -4  -2    8.30    1.00
   0   4   2    6.20    1.20
   0   4   2    7.00    0.70
   0   4   2    6.20    1.50
   0   4   2    6.40    1.20
   0   4   2    9.30    1.40
  -1  -4  -2   99.19    2.80
  -1  -4  -2  109.69    3.40
  -1  -4  -2  107.49    3.40
  -1  -4  -2  104.59    3.50
  -1  -4  -2  104.49    3.90
   1   4   2  100.49    3.80
   1   4   2  100.89    3.80
   1   4   2  101.59    2.80
   1   4   2  101.89    3.70
   1   4   2   99.89    3.60
  -2  -4  -2  138.89    4.30
  -2  -4  -2  133.99    4.40
  -2  -4  -2  142.29    4.20
  -2  -4  -2  138.69    3.80
  -2  -4  -2  133.49    4.90
   2   4   2  137.19    4.60
   2   4   2  133.69    3.80
   2   4   2  135.09    4.50
   2   4   2  138.89    4.60
  -3  -4  -2  138.69    4.50
  -3  -4  -2  138.29    4.00
  -3  -4  -2  143.09    4.60
  -3  -4  -2  134.19    4.20
   3   4   2  141.29    4.80
   3   4   2  132.79    4.70
  -4  -4  -2   54.79    2.80
  -4  -4  -2   57.99    2.50
  -4  -4  -2   56.39    2.40
  -4  -4  -2   55.79    2.80
   4   4   2   48.70    3.00
   4   4   2   52.29    2.90
  -5  -4  -2    7.40    1.50
  -5  -4  -2    5.40    1.40
  -5  -4  -2    5.50    1.20
  -5  -4  -2    5.70    1.60
   5   4   2    4.70    1.60
   5   4   2    6.20    1.80
  -6  -4  -2   24.70    2.00
  -6  -4  -2   23.40    2.60
  -6  -4  -2   21.80    2.20
  -6  -4  -2   22.10    2.50
   6   4   2   19.60    2.50
   6   4   2   18.10    2.30
  -7  -4  -2   15.50    2.30
  -7  -4  -2   18.00    2.30
  -7  -4  -2   14.50    2.10
   7   4   2   13.20    2.40
   7   4   2   14.20    2.10
  -8  -4  -2   -0.30    1.60
  -8  -4  -2   -0.10    1.70
  -8  -4  -2   -1.80    2.00
  -8  -4  -2   -1.20    1.70
   8   4   2   -1.10    2.10
  -9  -4  -2   12.40    2.30
  -9  -4  -2    5.90    2.30
  -9  -4  -2    4.10    2.40
  -9  -4  -2    9.90    2.60
   9   4   2    6.00    2.90
 -10  -4  -2   -2.90    2.30
 -10  -4  -2   -2.70    1.90
 -10  -4  -2    1.50    2.00
 -10  -4  -2   -1.60    2.50
  10   4   2    2.00    3.00
 -11  -4  -2   -0.10    2.30
 -11  -4  -2   -4.30    2.50
 -11  -4  -2    2.30    2.80
 -11  -4  -2    3.60    2.50
  11   4   2    1.90    3.10
 -12  -4  -2   -3.00    2.80
 -12  -4  -2    4.20    2.90
 -12  -4  -2    0.60    2.50
  12   4   2    7.00    3.20
 -17   5   2   -5.60    2.50
 -17   5   2   -0.10    2.50
 -17   5   2   11.10    4.70
 -16   5   2   -2.60    2.40
 -16   5   2    5.60    4.20
 -16   5   2    4.30    2.70
 -15   5   2    5.80    2.50
 -15   5   2    7.20    4.20
 -15   5   2    8.70    2.80
 -14   5   2   66.99    3.50
 -14   5   2   66.09    4.30
 -14   5   2   61.99    4.60
 -14   5   2   66.09    5.90
 -13   5   2    2.80    2.20
 -13   5   2    5.10    3.20
 -13   5   2    2.60    1.50
 -13   5   2    3.70    2.10
 -12   5   2    3.70    1.90
 -12   5   2    2.10    1.80
 -12   5   2    2.70    1.20
 -12   5   2    4.90    3.30
 -11   5   2    6.80    3.00
 -11   5   2    2.10    1.30
 -11   5   2    2.70    1.50
 -11   5   2    3.70    1.10
 -11   5   2    3.00    1.80
  10  -5  -2   16.20    2.30
 -10   5   2   14.40    2.10
 -10   5   2   13.20    2.00
 -10   5   2   12.60    2.70
 -10   5   2   16.20    1.50
 -10   5   2   10.70    1.60
   9  -5  -2   44.40    2.80
  -9   5   2   45.70    2.60
  -9   5   2   45.70    3.50
  -9   5   2   49.60    3.10
  -9   5   2   48.00    1.90
  -9   5   2   44.50    2.40
  -9   5   2   42.60    1.40
   8  -5  -2  112.79    3.40
   8  -5  -2  112.69    4.20
  -8   5   2  113.29    3.90
  -8   5   2  113.19    3.10
  -8   5   2  103.19    4.80
  -8   5   2  106.89    3.70
  -8   5   2  116.29    3.20
  -8   5   2  108.39    4.20
   7  -5  -2  124.19    4.20
   7  -5  -2  119.19    3.40
  -7   5   2  115.79    4.00
  -7   5   2  113.09    3.30
  -7   5   2  115.89    3.70
  -7   5   2  118.89    5.00
  -7   5   2  121.59    4.40
  -7   5   2  117.79    3.20
   6  -5  -2  308.57    8.30
  -6   5   2  307.07    8.50
  -6   5   2  299.67    8.20
  -6   5   2  303.97    7.70
  -6   5   2  310.97    7.60
  -6   5   2  306.17    7.30
  -6   5   2  298.67    9.10
   5  -5  -2   38.90    2.20
   5  -5  -2   39.20    1.50
  -5   5   2   43.10    2.40
  -5   5   2   37.00    1.60
  -5   5   2   36.90    1.30
  -5   5   2   38.90    2.40
  -5   5   2   32.20    2.10
  -5   5   2   38.50    1.90
  -5   5   2   39.80    2.90
   4  -5  -2    9.70    0.80
   4  -5  -2   10.30    1.10
   4  -5  -2   10.90    1.40
  -4   5   2   12.10    2.20
  -4   5   2   10.10    0.70
  -4   5   2   11.10    1.70
  -4   5   2   10.30    0.80
  -4   5   2   10.10    1.40
  -4   5   2   10.90    1.60
   3  -5  -2   58.19    2.00
   3  -5  -2   59.59    2.20
   3  -5  -2   57.99    2.50
   3  -5  -2   58.79    1.60
  -3   5   2   56.29    2.60
  -3   5   2   58.89    1.60
  -3   5   2   54.49    2.70
  -3   5   2   54.59    3.10
  -3   5   2   60.39    1.80
  -3   5   2   55.69    2.80
   2  -5  -2  190.68    5.80
   2  -5  -2  186.38    5.00
   2  -5  -2  192.88    5.10
  -2   5   2  187.58    5.60
  -2   5   2  189.78    5.60
  -2   5   2  183.18    6.00
  -2   5   2  187.18    5.80
  -2   5   2  184.38    4.90
   1  -5  -2   19.50    1.40
   1  -5  -2   18.20    1.60
   1  -5  -2   17.80    1.40
   1  -5  -2   16.70    1.90
  -1   5   2   20.60    1.90
  -1   5   2   18.40    2.10
  -1   5   2   18.50    2.10
  -1   5   2   17.20    1.70
   0  -5  -2  565.74   14.00
   0  -5  -2  551.84   13.10
   0  -5  -2  556.84   14.40
   0  -5  -2  581.14   13.80
   0  -5  -2  560.44   13.80
   0   5   2  564.04   14.30
   0   5   2  561.34   14.50
   0   5   2  553.84   14.30
   0   5   2  565.54   13.10
   0   5   2  584.74   14.40
  -1  -5  -2  383.66   10.30
  -1  -5  -2  400.96   10.20
  -1  -5  -2  406.86   10.90
  -1  -5  -2  399.16    9.60
  -1  -5  -2  401.06   10.30
   1   5   2  407.56   10.80
   1   5   2  400.56   10.80
   1   5   2  410.36   10.80
   1   5   2  404.66   10.70
   1   5   2  401.76    9.60
  -2  -5  -2   44.70    1.90
  -2  -5  -2   43.60    2.50
  -2  -5  -2   43.90    2.50
  -2  -5  -2   40.80    2.30
   2   5   2   45.60    2.80
   2   5   2   46.60    2.70
   2   5   2   44.80    2.80
  -3  -5  -2   19.10    1.60
  -3  -5  -2   15.20    1.80
  -3  -5  -2   18.60    2.10
  -3  -5  -2   20.30    1.60
   3   5   2   16.80    2.40
   3   5   2   14.80    2.20
  -4  -5  -2   -0.30    1.30
  -4  -5  -2    0.00    1.10
  -4  -5  -2   -0.20    1.10
  -4  -5  -2    0.20    1.30
   4   5   2    1.30    1.70
   4   5   2   -0.50    1.30
  -5  -5  -2    4.10    1.60
  -5  -5  -2    4.50    1.60
  -5  -5  -2    6.80    1.60
  -5  -5  -2    3.50    1.30
   5   5   2    4.70    1.70
   5   5   2    3.20    1.90
  -6  -5  -2    1.70    1.50
  -6  -5  -2    2.70    1.70
  -6  -5  -2    2.30    1.60
   6   5   2    0.20    1.70
   6   5   2    1.00    1.80
  -7  -5  -2   -1.50    1.80
  -7  -5  -2    1.80    2.00
  -7  -5  -2   -0.20    1.80
   7   5   2   -0.80    2.00
   7   5   2   -1.40    1.70
  -8  -5  -2    1.30    2.00
  -8  -5  -2   -0.70    1.90
  -8  -5  -2    0.20    2.10
  -8  -5  -2    0.90    1.90
   8   5   2    2.90    2.40
  -9  -5  -2   12.30    2.60
  -9  -5  -2   12.80    2.70
  -9  -5  -2   14.50    2.70
  -9  -5  -2   14.10    2.90
   9   5   2    6.70    2.90
 -10  -5  -2    3.50    2.60
 -10  -5  -2    4.90    2.70
 -10  -5  -2    8.20    2.90
 -10  -5  -2   -2.00    3.00
  10   5   2   -0.90    2.70
 -11  -5  -2   12.40    3.00
 -11  -5  -2    4.30    2.70
  11   5   2    0.80    2.90
 -12  -5  -2    1.80    2.80
 -12  -5  -2    6.50    3.10
  12   5   2   -0.20    3.10
 -17   6   2    0.60    2.60
 -17   6   2    0.80    2.90
 -17   6   2    6.30    4.00
 -16   6   2    2.80    2.70
 -16   6   2    4.40    3.80
 -16   6   2    5.20    2.90
 -15   6   2   -0.10    2.50
 -15   6   2    2.80    2.50
 -15   6   2    5.80    3.80
 -14   6   2   46.20    3.60
 -14   6   2   55.79    5.60
 -14   6   2   45.20    4.30
 -13   6   2   51.09    3.60
 -13   6   2   41.10    3.70
 -13   6   2   42.60    4.50
 -13   6   2   39.30    2.60
 -12   6   2    2.00    1.90
 -12   6   2    1.10    1.60
 -12   6   2    2.10    1.10
 -12   6   2    2.10    2.80
 -11   6   2    1.30    1.20
 -11   6   2   10.10    1.90
 -11   6   2    3.80    1.80
 -11   6   2    7.40    3.00
 -11   6   2    5.00    1.10
  10  -6  -2    3.60    1.40
 -10   6   2    1.70    1.20
 -10   6   2    4.40    0.90
 -10   6   2    4.60    1.50
 -10   6   2    3.70    0.60
 -10   6   2    1.00    1.40
 -10   6   2    3.10    2.60
   9  -6  -2   64.29    3.30
   9  -6  -2   66.29    2.50
  -9   6   2   61.99    2.90
  -9   6   2   63.89    3.50
  -9   6   2   65.39    2.20
  -9   6   2   62.69    3.00
  -9   6   2   63.59    2.20
  -9   6   2   59.59    4.00
   8  -6  -2   10.60    1.60
  -8   6   2    9.30    1.00
  -8   6   2    9.70    1.40
  -8   6   2    7.90    0.90
  -8   6   2    7.80    1.60
  -8   6   2    7.90    1.40
  -8   6   2   10.40    2.40
   7  -6  -2   85.99    3.50
  -7   6   2   87.49    3.80
  -7   6   2   89.39    4.60
  -7   6   2   88.59    2.50
  -7   6   2   89.99    3.50
  -7   6   2   84.09    3.00
   6  -6  -2   68.19    3.00
  -6   6   2   69.09    3.20
  -6   6   2   69.79    4.00
  -6   6   2   72.39    2.10
  -6   6   2   71.59    2.40
  -6   6   2   70.39    3.30
  -6   6   2   71.79    3.10
   5  -6  -2   24.20    1.20
   5  -6  -2   24.20    2.00
  -5   6   2   23.90    2.80
  -5   6   2   26.30    1.10
  -5   6   2   21.90    2.00
  -5   6   2   24.90    2.10
  -5   6   2   25.70    1.30
  -5   6   2   24.50    2.10
   4  -6  -2   14.70    1.70
   4  -6  -2   14.00    1.40
   4  -6  -2   12.70    0.90
  -4   6   2   16.10    2.60
  -4   6   2   14.00    2.00
  -4   6   2   10.10    1.50
  -4   6   2   12.50    0.90
  -4   6   2   13.30    1.00
  -4   6   2   14.20    1.90
   3  -6  -2  146.99    4.10
   3  -6  -2  144.29    4.50
   3  -6  -2  148.59    4.30
  -3   6   2  141.89    5.00
  -3   6   2  146.89    5.40
  -3   6   2  140.29    4.80
  -3   6   2  134.99    3.90
  -3   6   2  140.89    4.80
   2  -6  -2    0.10    0.90
   2  -6  -2    1.60    1.00
  -2   6   2    0.80    1.10
  -2   6   2    0.80    1.60
  -2   6   2   -0.20    1.20
  -2   6   2    1.10    1.40
   1  -6  -2  373.36    9.60
   1  -6  -2  388.36    9.70
   1  -6  -2  375.16   10.30
   1  -6  -2  372.46    9.90
  -1   6   2  393.66   10.30
  -1   6   2  369.76   10.30
  -1   6   2  379.16   10.50
  -1   6   2  370.16   10.20
   0  -6  -2  389.56    9.90
   0  -6  -2  379.16    9.10
   0  -6  -2  373.66   10.60
   0  -6  -2  375.46    9.90
   0  -6  -2  386.56   10.10
   0   6   2  387.26   10.60
   0   6   2  385.86   10.50
   0   6   2  374.86    9.10
   0   6   2  397.86   10.50
   0   6   2  377.46   10.50
  -1  -6  -2  156.38    4.20
  -1  -6  -2  157.08    4.90
  -1  -6  -2  153.58    4.80
   1   6   2  153.38    5.30
   1   6   2  158.28    5.30
   1   6   2  148.79    5.40
   1   6   2  149.29    4.10
  -2  -6  -2    1.70    0.90
  -2  -6  -2    2.10    1.30
  -2  -6  -2    1.10    1.10
  -2  -6  -2    1.40    1.10
   2   6   2    1.20    1.30
   2   6   2    1.10    1.30
   2   6   2    1.50    1.50
  -3  -6  -2   32.60    1.90
  -3  -6  -2   35.90    2.40
  -3  -6  -2   33.40    2.40
  -3  -6  -2   28.30    2.20
   3   6   2   32.80    2.70
   3   6   2   36.40    2.90
  -4  -6  -2   21.70    2.50
  -4  -6  -2   23.60    2.30
  -4  -6  -2   21.80    2.00
  -4  -6  -2   19.70    2.10
   4   6   2   22.30    2.80
   4   6   2   22.70    2.70
  -5  -6  -2    4.00    1.80
  -5  -6  -2    2.00    1.40
  -5  -6  -2    3.70    1.60
   5   6   2    1.90    2.10
   5   6   2    5.90    1.90
  -6  -6  -2    6.10    1.90
  -6  -6  -2    4.80    1.90
  -6  -6  -2    5.10    2.10
   6   6   2    5.90    2.60
   6   6   2    4.80    2.10
  -7  -6  -2    9.10    2.20
  -7  -6  -2   14.30    2.60
  -7  -6  -2    6.80    2.20
   7   6   2   10.90    4.00
   7   6   2    4.10    2.50
  -8  -6  -2   10.90    2.50
  -8  -6  -2    5.60    2.40
  -8  -6  -2    9.80    2.60
  -8  -6  -2   12.30    2.60
   8   6   2    4.60    2.80
  -9  -6  -2    3.50    2.30
  -9  -6  -2    0.40    2.30
   9   6   2    1.70    2.90
 -10  -6  -2    5.80    2.50
 -10  -6  -2    3.90    2.70
  10   6   2   -3.70    2.80
 -11  -6  -2    2.00    2.80
 -11  -6  -2    5.30    2.80
  11   6   2   -2.20    3.50
 -17   7   2    2.60    2.90
 -17   7   2   15.30    5.10
 -17   7   2    3.50    2.90
 -16   7   2    3.40    2.50
 -16   7   2    8.10    4.50
 -16   7   2    3.60    2.70
 -15   7   2    8.10    2.70
 -15   7   2   10.70    2.80
 -15   7   2   15.70    4.40
 -14   7   2   25.80    4.50
 -14   7   2   27.50    3.30
 -14   7   2   25.40    3.70
 -13   7   2   22.20    2.90
 -13   7   2   14.60    2.60
 -13   7   2   28.30    4.10
 -12   7   2   17.30    2.30
 -12   7   2   20.30    3.90
 -12   7   2   20.10    3.10
 -12   7   2   18.00    1.70
 -11   7   2    8.90    1.60
 -11   7   2   10.00    1.70
 -11   7   2   10.20    2.90
 -11   7   2    8.80    1.30
 -11   7   2    9.70    2.00
 -10   7   2   74.09    4.80
 -10   7   2   64.59    2.40
 -10   7   2   62.79    2.90
 -10   7   2   71.49    3.80
 -10   7   2   69.39    2.30
 -10   7   2   65.39    3.20
   9  -7  -2    3.50    1.30
  -9   7   2    2.40    1.50
  -9   7   2    2.40    0.60
  -9   7   2    4.60    2.60
  -9   7   2    4.40    1.30
  -9   7   2    3.80    1.30
   8  -7  -2   32.90    2.40
  -8   7   2   33.60    2.40
  -8   7   2   30.10    2.60
  -8   7   2   30.10    1.90
  -8   7   2   32.30    1.30
  -8   7   2   26.60    3.40
   7  -7  -2    5.10    1.30
  -7   7   2    6.10    0.90
  -7   7   2    3.50    1.50
  -7   7   2    4.60    1.30
  -7   7   2    4.90    1.50
  -7   7   2    6.30    0.90
  -7   7   2    4.70    1.00
  -7   7   2    6.40    2.20
   6  -7  -2   45.40    2.50
   6  -7  -2   43.60    1.80
  -6   7   2   46.00    2.70
  -6   7   2   44.80    2.80
  -6   7   2   46.50    1.90
  -6   7   2   43.30    3.30
  -6   7   2   48.90    1.60
   5  -7  -2   11.10    1.10
   5  -7  -2   15.20    1.80
  -5   7   2   12.20    1.10
  -5   7   2   14.70    2.10
  -5   7   2   17.60    2.90
  -5   7   2   14.70    2.10
  -5   7   2   15.60    2.20
  -5   7   2   15.70    1.10
   4  -7  -2    1.70    1.20
  -4   7   2    3.80    1.70
  -4   7   2    1.90    0.50
  -4   7   2    3.10    1.40
  -4   7   2    2.20    0.70
  -4   7   2    2.00    1.30
  -4   7   2    2.40    2.00
   3  -7  -2  251.17    6.80
   3  -7  -2  259.87    7.20
   3  -7  -2  256.57    6.90
  -3   7   2  254.27    7.90
  -3   7   2  251.67    8.10
  -3   7   2  252.47    7.60
  -3   7   2  255.47    7.60
   2  -7  -2  237.48    6.50
   2  -7  -2  232.68    6.50
  -2   7   2  236.18    7.50
  -2   7   2  231.58    7.10
  -2   7   2  232.58    7.50
  -2   7   2  230.48    7.10
   1  -7  -2  295.27    8.30
   1  -7  -2  309.77    8.60
   1  -7  -2  321.17    8.40
  -1   7   2  319.37    9.30
  -1   7   2  305.77    9.00
  -1   7   2  320.37    9.20
  -1   7   2  329.97    9.20
   0  -7  -2   16.10    2.00
   0  -7  -2   16.00    1.80
   0  -7  -2   14.60    1.10
   0  -7  -2   16.50    1.70
   0   7   2   18.30    2.10
   0   7   2   17.40    2.20
   0   7   2   13.60    2.40
   0   7   2   18.30    2.40
   0   7   2   15.50    1.00
  -1  -7  -2   35.40    2.30
  -1  -7  -2   38.10    1.70
  -1  -7  -2   36.90    2.40
  -1  -7  -2   38.60    2.50
   1   7   2   34.10    1.60
   1   7   2   30.90    2.70
   1   7   2   34.20    2.90
   1   7   2   39.40    2.90
  -2  -7  -2    2.10    1.50
  -2  -7  -2    3.80    1.00
  -2  -7  -2    2.80    1.40
  -2  -7  -2    1.10    1.30
   2   7   2    0.50    1.50
   2   7   2    2.70    1.70
   2   7   2    2.50    1.60
  -3  -7  -2   -1.70    1.30
  -3  -7  -2    0.30    1.10
  -3  -7  -2   -0.30    1.30
   3   7   2    0.60    1.60
   3   7   2    1.60    1.80
  -4  -7  -2    8.80    1.50
  -4  -7  -2   11.20    2.20
  -4  -7  -2    6.60    1.80
   4   7   2    6.90    2.10
   4   7   2    9.10    2.20
  -5  -7  -2   30.60    2.60
  -5  -7  -2   38.10    3.50
  -5  -7  -2   28.00    2.80
   5   7   2   31.80    3.20
   5   7   2   31.50    3.30
  -6  -7  -2   14.60    2.30
  -6  -7  -2   11.20    2.40
  -6  -7  -2   13.90    2.50
   6   7   2   10.80    2.40
   6   7   2   16.40    2.90
  -7  -7  -2    1.80    1.90
  -7  -7  -2   -0.50    2.40
   7   7   2   -1.00    2.80
  -8  -7  -2   50.29    3.60
  -8  -7  -2   33.40    4.40
   8   7   2   41.50    4.80
  -9  -7  -2    0.00    2.80
  -9  -7  -2    1.10    2.30
   9   7   2   -5.10    3.10
 -10  -7  -2    4.50    2.60
 -10  -7  -2   -3.50    2.40
  10   7   2    1.50    3.80
 -17   8   2    2.60    2.70
 -17   8   2    5.80    2.90
 -17   8   2   15.70    5.10
 -16   8   2   15.40    4.80
 -16   8   2    7.60    2.60
 -16   8   2    0.20    2.50
 -15   8   2    0.10    2.40
 -15   8   2    7.00    4.30
 -15   8   2    0.90    2.30
 -14   8   2    3.30    4.00
 -14   8   2   -0.90    2.10
 -14   8   2    1.20    1.90
 -13   8   2   18.50    2.70
 -13   8   2   20.50    4.50
 -13   8   2   17.50    2.80
 -12   8   2  155.48    7.60
 -12   8   2  162.88    5.50
 -12   8   2  146.39    6.20
 -11   8   2    3.70    1.40
 -11   8   2    4.90    1.60
 -11   8   2    5.60    0.90
 -11   8   2    6.50    2.00
 -11   8   2    5.00    2.90
 -10   8   2   -0.50    0.60
 -10   8   2    0.80    1.20
 -10   8   2   -2.40    2.60
 -10   8   2    1.40    1.20
 -10   8   2    0.30    1.50
  -9   8   2    0.70    1.10
  -9   8   2    2.50    1.30
  -9   8   2    4.50    2.70
  -9   8   2    0.60    1.40
  -9   8   2    1.40    0.60
  -9   8   2    0.80    1.40
   8  -8  -2  288.47    8.70
  -8   8   2  293.37    7.30
  -8   8   2  306.77    8.60
  -8   8   2  296.47    8.90
  -8   8   2  300.47    7.80
  -8   8   2  303.77    7.40
  -8   8   2  300.77    8.90
  -8   8   2  300.47   10.00
   7  -8  -2  175.78    5.60
  -7   8   2  176.08    4.80
  -7   8   2  175.58    6.90
  -7   8   2  171.08    6.00
  -7   8   2  174.78    4.70
  -7   8   2  181.88    4.60
  -7   8   2  181.28    5.90
   6  -8  -2  155.18    4.20
   6  -8  -2  157.58    5.00
  -6   8   2  160.68    6.00
  -6   8   2  145.79    6.30
  -6   8   2  150.08    5.40
  -6   8   2  155.08    4.20
  -6   8   2  157.58    4.20
  -6   8   2  155.28    5.40
   5  -8  -2   15.50    1.80
  -5   8   2   13.10    2.20
  -5   8   2   16.70    1.00
  -5   8   2   18.40    2.10
  -5   8   2   15.70    1.20
  -5   8   2   15.80    2.20
  -5   8   2   14.20    2.80
   4  -8  -2    1.30    1.00
   4  -8  -2    2.10    1.10
  -4   8   2    3.00    1.40
  -4   8   2    2.20    1.70
  -4   8   2    2.30    1.40
  -4   8   2   -0.50    1.80
   3  -8  -2  175.98    5.50
   3  -8  -2  175.88    5.30
  -3   8   2  170.08    6.00
  -3   8   2  185.18    6.30
  -3   8   2  179.88    6.60
  -3   8   2  184.78    6.10
   2  -8  -2  100.69    3.70
  -2   8   2   96.59    4.40
  -2   8   2  101.99    4.60
  -2   8   2  100.49    4.30
  -2   8   2   95.09    4.10
   1  -8  -2    1.30    1.10
   1  -8  -2    4.40    1.30
  -1   8   2    0.70    1.40
  -1   8   2    2.90    1.40
  -1   8   2    2.60    1.80
  -1   8   2    4.20    1.70
   0  -8  -2   15.90    2.10
   0  -8  -2   14.30    1.90
   0  -8  -2   16.30    1.20
   0   8   2   13.50    2.40
   0   8   2   14.30    1.00
   0   8   2   17.70    2.50
   0   8   2   19.20    2.30
   0   8   2   17.60    2.20
  -1  -8  -2   17.50    1.50
  -1  -8  -2   19.80    2.20
  -1  -8  -2   16.80    2.40
   1   8   2   20.90    2.60
   1   8   2   17.70    1.30
   1   8   2   19.50    2.40
   1   8   2   20.20    2.70
  -2  -8  -2   11.50    2.00
  -2  -8  -2   13.30    1.50
  -2  -8  -2   14.60    2.10
   2   8   2   15.40    2.30
   2   8   2   12.70    2.50
  -3  -8  -2   28.20    2.90
  -3  -8  -2   32.50    2.20
  -3  -8  -2   26.70    2.80
   3   8   2   32.20    3.10
   3   8   2   42.40    3.80
  -4  -8  -2   85.79    4.40
  -4  -8  -2   91.19    3.70
  -4  -8  -2   94.59    4.60
   4   8   2   91.39    4.90
   4   8   2   93.69    5.20
  -5  -8  -2   77.49    3.60
  -5  -8  -2   65.19    4.20
   5   8   2   71.49    4.60
   5   8   2   82.79    5.10
  -6  -8  -2   19.90    3.20
  -6  -8  -2   23.80    2.80
   6   8   2   26.00    3.60
   6   8   2   15.20    3.40
  -7  -8  -2    3.60    2.60
  -7  -8  -2    6.90    2.20
   7   8   2    2.90    3.20
  -8  -8  -2    3.50    2.60
   8   8   2   -3.10    3.10
  -9  -8  -2    0.50    2.70
   9   8   2   -4.40    3.00
 -17   9   2    7.70    4.90
 -17   9   2    5.30    2.80
 -17   9   2   -0.30    2.60
 -16   9   2    0.60    2.40
 -16   9   2    5.10    4.20
 -16   9   2    6.40    2.70
 -15   9   2   12.60    4.40
 -15   9   2    6.40    2.50
 -15   9   2    8.40    2.30
 -14   9   2    4.10    3.90
 -14   9   2    7.60    2.40
 -14   9   2    6.80    2.40
 -13   9   2   78.79    6.00
 -13   9   2   76.59    4.00
 -13   9   2   81.49    4.80
 -12   9   2  239.18    8.10
 -12   9   2  221.18    7.00
 -12   9   2  231.88    9.40
 -11   9   2    8.00    3.50
 -11   9   2    1.90    1.40
 -11   9   2    4.50    1.80
 -11   9   2    3.60    1.50
 -10   9   2    0.50    0.60
 -10   9   2    1.70    1.60
 -10   9   2    2.30    1.40
 -10   9   2    1.10    1.20
 -10   9   2    0.80    1.60
 -10   9   2    0.70    2.60
  -9   9   2    2.00    1.50
  -9   9   2    1.90    2.70
  -9   9   2    2.10    1.40
  -9   9   2    1.40    1.50
  -9   9   2    2.20    0.80
  -9   9   2    0.30    0.60
  -9   9   2    1.00    1.10
  -8   9   2   41.60    2.80
  -8   9   2   37.30    1.50
  -8   9   2   33.50    2.80
  -8   9   2   35.60    1.70
  -8   9   2   36.40    3.90
  -8   9   2   34.50    1.90
   7  -9  -2   67.99    3.00
  -7   9   2   62.69    2.10
  -7   9   2   62.59    3.40
  -7   9   2   61.69    2.30
  -7   9   2   62.29    3.90
  -7   9   2   59.69    3.40
  -7   9   2   54.69    4.00
   6  -9  -2   84.69    3.50
  -6   9   2   90.99    4.50
  -6   9   2   88.69    2.60
  -6   9   2   88.59    3.10
  -6   9   2   91.99    4.10
  -6   9   2   87.19    4.10
  -6   9   2   94.29    5.20
   5  -9  -2   14.70    1.80
  -5   9   2   10.60    1.90
  -5   9   2   13.30    2.90
  -5   9   2    9.70    1.80
  -5   9   2   14.30    2.40
   4  -9  -2   38.90    2.30
   4  -9  -2   39.40    2.50
  -4   9   2   44.10    3.70
  -4   9   2   39.00    2.90
  -4   9   2   39.10    3.30
  -4   9   2   34.00    2.80
   3  -9  -2  328.27    9.20
   3  -9  -2  336.07    9.10
  -3   9   2  349.67   10.50
  -3   9   2  341.17   10.20
  -3   9   2  325.87    9.90
  -3   9   2  332.97    9.70
   2  -9  -2  171.08    5.40
  -2   9   2  167.08    6.40
  -2   9   2  168.08    6.00
  -2   9   2  164.18    5.90
  -2   9   2  150.88    6.10
   1  -9  -2    2.50    1.40
   1  -9  -2    0.70    1.20
  -1   9   2   -0.20    1.50
  -1   9   2    2.20    1.60
  -1   9   2   -0.40    1.70
  -1   9   2   -1.50    1.80
   0  -9  -2   34.00    2.80
   0  -9  -2   37.50    2.70
   0  -9  -2   33.40    1.60
   0   9   2   27.00    3.00
   0   9   2   34.70    3.00
   0   9   2   32.60    3.50
   0   9   2   38.00    3.00
  -1  -9  -2   37.10    1.90
  -1  -9  -2   32.10    2.70
  -1  -9  -2   32.00    2.70
   1   9   2   24.70    2.80
   1   9   2   32.50    3.30
  -2  -9  -2    6.20    1.90
  -2  -9  -2    7.80    1.40
   2   9   2    6.10    2.20
   2   9   2    7.80    2.10
  -3  -9  -2   19.60    2.70
  -3  -9  -2   16.50    2.10
   3   9   2   15.20    2.90
   3   9   2   14.00    2.80
  -4  -9  -2   56.69    4.30
   4   9   2   64.69    4.80
   4   9   2   63.09    4.20
  -5  -9  -2   37.00    4.00
   5   9   2   29.00    3.60
   5   9   2   29.00    3.80
  -6  -9  -2   11.40    2.80
   6   9   2    7.80    2.90
  -7  -9  -2    3.10    2.70
   7   9   2    0.30    2.90
  -8  -9  -2    4.30    3.00
   8   9   2    2.90    3.30
 -17  10   2    4.20    2.60
 -17  10   2   -1.10    2.30
 -17  10   2    9.20    5.00
 -16  10   2    1.40    2.10
 -16  10   2    3.70    4.60
 -16  10   2    3.00    2.40
 -15  10   2   17.80    5.20
 -15  10   2    5.20    2.60
 -15  10   2    5.20    2.40
 -14  10   2    3.30    2.00
 -14  10   2    7.70    4.50
 -14  10   2    0.40    2.00
 -13  10   2    6.50    2.30
 -13  10   2    9.70    2.10
 -13  10   2    9.80    4.40
 -12  10   2   44.80    2.80
 -12  10   2   38.60    4.70
 -12  10   2   37.20    3.70
 -12  10   2   43.90    3.80
 -11  10   2   46.40    3.70
 -11  10   2   40.40    2.50
 -11  10   2   37.20    3.50
 -11  10   2   40.10    4.50
 -10  10   2    6.20    1.70
 -10  10   2    3.60    1.70
 -10  10   2    5.20    1.80
 -10  10   2    7.30    3.50
 -10  10   2    2.50    1.30
  -9  10   2   57.49    2.10
  -9  10   2   51.79    4.30
  -9  10   2   57.79    4.90
  -9  10   2   54.99    3.50
  -9  10   2   51.29    3.30
  -9  10   2   52.29    2.50
  -8  10   2    6.90    1.80
  -8  10   2    4.60    1.00
  -8  10   2    6.00    2.30
  -8  10   2    4.90    2.80
  -8  10   2    4.00    1.10
  -8  10   2    1.70    1.50
   7 -10  -2   11.60    1.90
  -7  10   2   13.70    2.10
  -7  10   2   13.80    3.20
  -7  10   2   13.10    2.00
  -7  10   2   17.30    1.30
  -7  10   2    9.40    2.60
   6 -10  -2    2.90    1.10
  -6  10   2    0.30    1.50
  -6  10   2    0.70    1.90
  -6  10   2    2.90    2.50
  -6  10   2    0.50    1.40
  -5  10   2   33.10    3.80
  -5  10   2   33.20    2.90
  -5  10   2   32.00    3.20
  -5  10   2   36.10    2.90
   4 -10  -2   57.49    3.00
   4 -10  -2   56.39    2.90
  -4  10   2   53.69    3.40
  -4  10   2   49.90    4.00
  -4  10   2   54.09    3.50
  -4  10   2   59.69    4.10
   3 -10  -2   20.40    2.30
   3 -10  -2   27.10    2.50
  -3  10   2   21.50    2.90
  -3  10   2   18.40    2.70
  -3  10   2   19.90    3.20
  -3  10   2   23.50    2.70
   2 -10  -2    3.00    1.40
  -2  10   2    4.10    2.30
  -2  10   2    3.90    2.00
  -2  10   2    6.00    1.90
   1 -10  -2   40.90    3.10
  -1  10   2   40.00    3.40
  -1  10   2   38.30    3.50
  -1  10   2   32.60    3.30
   0 -10  -2   41.50    3.20
   0  10   2   30.60    3.30
   0  10   2   30.20    3.70
  -1 -10  -2   36.00    3.20
   1  10   2   37.70    4.00
   1  10   2   39.40    3.70
  -2 -10  -2    8.30    2.60
   2  10   2    2.00    2.20
   2  10   2    5.70    2.30
  -3 -10  -2    6.60    2.70
   3  10   2   10.20    3.10
   3  10   2    9.30    2.70
  -4 -10  -2   65.49    4.50
   4  10   2   60.19    4.70
   4  10   2   67.59    5.20
  -5 -10  -2   18.60    3.20
   5  10   2   16.20    3.70
   5  10   2   12.10    3.50
  -6 -10  -2    1.90    2.80
   6  10   2    1.80    3.20
  -7 -10  -2    0.80    3.30
   7  10   2   -3.60    2.80
 -17  11   2    1.40    2.60
 -17  11   2   10.00    2.80
 -17  11   2    8.30    4.50
 -16  11   2    2.80    2.40
 -16  11   2    5.70    2.40
 -16  11   2   13.30    5.10
 -15  11   2    5.50    2.50
 -15  11   2    9.40    2.40
 -15  11   2    8.80    4.70
 -14  11   2   12.50    2.70
 -14  11   2    7.40    2.50
 -14  11   2   10.20    2.20
 -14  11   2   22.10    5.40
 -13  11   2   41.50    3.90
 -13  11   2   43.70    3.10
 -13  11   2   37.50    3.80
 -13  11   2   33.10    5.00
 -12  11   2   41.40    3.60
 -12  11   2   44.80    2.90
 -12  11   2   46.80    3.70
 -12  11   2   47.00    5.10
 -11  11   2    1.50    1.80
 -11  11   2    0.50    3.50
 -11  11   2    2.70    1.40
 -10  11   2    0.50    1.70
 -10  11   2    2.10    1.20
 -10  11   2    3.90    2.40
 -10  11   2    0.60    3.20
  -9  11   2   13.60    2.30
  -9  11   2   16.00    3.80
  -9  11   2   14.00    2.20
  -9  11   2   13.30    1.60
  -9  11   2   10.20    2.80
  -8  11   2    7.20    2.60
  -8  11   2    7.80    1.90
  -8  11   2    9.40    1.30
  -8  11   2    6.50    1.80
  -8  11   2    9.20    3.10
  -7  11   2   24.50    2.80
  -7  11   2   25.10    3.30
  -7  11   2   27.20    2.80
  -7  11   2   26.50    3.80
  -6  11   2    8.60    2.00
  -6  11   2   10.50    2.10
  -6  11   2   12.30    2.70
  -6  11   2   11.40    3.10
  -5  11   2    4.80    2.70
  -5  11   2    7.10    1.90
  -5  11   2    7.00    2.30
   4 -11  -2   15.70    2.30
  -4  11   2   20.00    3.10
  -4  11   2   19.00    2.70
  -4  11   2   18.90    3.50
   3 -11  -2    3.20    1.60
  -3  11   2    3.30    1.80
  -3  11   2    1.10    2.30
  -3  11   2    7.00    2.60
   2 -11  -2    0.00    1.60
  -2  11   2   -0.60    2.00
  -2  11   2   -0.90    2.20
  -2  11   2    1.70    2.00
   1 -11  -2    3.80    2.00
  -1  11   2    0.70    2.20
  -1  11   2    3.60    2.30
  -1  11   2    1.10    2.10
   0 -11  -2   78.79    4.50
   0  11   2   78.69    4.70
   0  11   2   86.19    5.30
  -1 -11  -2   17.30    2.80
   1  11   2   15.50    3.00
   1  11   2   15.00    2.70
  -2 -11  -2   30.40    3.80
   2  11   2   21.40    3.60
   2  11   2   21.80    3.40
  -3 -11  -2    1.20    2.70
   3  11   2    1.10    2.30
   3  11   2    0.00    2.80
  -4 -11  -2   10.70    2.90
   4  11   2    4.60    2.90
   4  11   2    3.30    2.60
  -5 -11  -2   -1.10    2.60
   5  11   2   -3.10    2.60
  -6 -11  -2    3.50    2.90
   6  11   2    2.50    3.00
 -16  12   2   -1.60    2.30
 -16  12   2    3.80    2.50
 -16  12   2    4.30    4.80
 -16  12   2    3.80    2.30
 -15  12   2    7.00    2.30
 -15  12   2    3.40    4.10
 -15  12   2    2.30    2.20
 -15  12   2   -0.90    2.20
 -14  12   2    2.20    4.40
 -14  12   2    3.90    1.90
 -14  12   2    1.50    2.10
 -14  12   2    1.10    2.20
 -13  12   2    1.40    2.10
 -13  12   2    1.70    2.10
 -13  12   2    8.00    2.30
 -13  12   2    4.50    3.90
 -12  12   2   14.50    4.50
 -12  12   2   18.40    2.80
 -12  12   2   18.10    3.60
 -11  12   2   -0.40    3.10
 -11  12   2    0.10    1.70
 -11  12   2   -0.70    2.20
 -10  12   2    1.70    1.70
 -10  12   2   -1.60    2.30
 -10  12   2    3.60    3.40
  -9  12   2   22.70    3.00
  -9  12   2   30.00    4.60
  -9  12   2   28.30    3.80
  -8  12   2   27.50    4.60
  -8  12   2   17.20    2.50
  -8  12   2   14.70    3.30
  -7  12   2   24.10    3.60
  -7  12   2   28.20    4.40
  -7  12   2   29.20    3.00
  -6  12   2    2.90    2.80
  -6  12   2   -0.70    2.50
  -6  12   2    1.00    1.70
  -5  12   2   18.20    3.50
  -5  12   2   17.40    3.10
  -5  12   2   14.50    2.50
   4 -12  -2    3.50    1.80
  -4  12   2    4.50    2.70
  -4  12   2    4.10    2.80
  -4  12   2    2.20    1.90
   3 -12  -2   21.10    2.80
  -3  12   2   22.70    3.30
  -3  12   2   17.60    3.30
  -3  12   2   16.50    2.80
   2 -12  -2    2.10    1.90
  -2  12   2   -0.30    2.10
  -2  12   2    1.80    2.30
   1 -12  -2   79.69    4.50
  -1  12   2   82.99    4.80
  -1  12   2   76.99    5.40
   0 -12  -2    3.50    2.20
   0  12   2    4.80    2.60
   0  12   2    5.20    2.30
  -1 -12  -2    9.40    2.70
   1  12   2    4.90    2.70
   1  12   2    4.60    2.60
  -2 -12  -2    9.70    2.80
   2  12   2    9.90    2.70
   2  12   2   11.30    3.20
  -3 -12  -2   -1.70    2.40
   3  12   2    0.40    2.40
   3  12   2    2.70    3.10
  -4 -12  -2    3.80    3.10
   4  12   2   -1.00    2.70
  -5 -12  -2    3.90    2.90
   5  12   2    2.20    3.40
 -16  13   2    6.50    5.00
 -16  13   2   -0.60    2.20
 -16  13   2    2.80    2.50
 -15  13   2    4.00    2.30
 -15  13   2    5.40    4.80
 -15  13   2    4.00    2.30
 -14  13   2    1.70    2.10
 -14  13   2    5.30    4.10
 -13  13   2   24.50    5.00
 -13  13   2   22.20    3.90
 -13  13   2   18.60    2.90
 -12  13   2   16.70    4.90
 -12  13   2   13.10    2.50
 -12  13   2   13.10    3.70
 -11  13   2   -1.40    2.80
 -11  13   2    1.70    1.90
 -11  13   2    0.10    3.50
 -10  13   2   16.20    4.10
 -10  13   2   12.20    2.50
 -10  13   2   11.60    3.10
  -9  13   2   36.20    4.30
  -9  13   2   39.30    3.50
  -9  13   2   49.80    5.40
  -8  13   2   10.50    2.40
  -8  13   2   13.20    3.40
  -8  13   2   11.70    3.80
  -7  13   2   40.50    5.00
  -7  13   2   37.20    3.50
  -7  13   2   40.30    4.70
  -6  13   2   85.09    5.40
  -6  13   2   98.69    5.00
  -6  13   2   93.49    5.90
  -5  13   2    3.20    2.10
  -5  13   2    2.50    2.90
  -5  13   2    6.70    2.80
   4 -13  -2   30.10    3.10
  -4  13   2   32.70    3.50
  -4  13   2   29.80    4.30
   3 -13  -2   31.70    3.50
  -3  13   2   23.60    3.40
  -3  13   2   23.90    3.70
   2 -13  -2   12.80    2.70
  -2  13   2   12.30    3.10
  -2  13   2   18.10    3.10
   1 -13  -2   -0.70    2.20
  -1  13   2   -2.30    2.20
  -1  13   2   -1.60    2.40
   0 -13  -2   28.00    3.50
   0  13   2   28.00    4.00
   0  13   2   29.50    4.00
  -1 -13  -2   -1.20    2.20
   1  13   2   -2.70    2.50
   1  13   2   -0.70    2.50
  -2 -13  -2    2.70    2.70
   2  13   2   -6.40    2.20
   2  13   2   -5.20    2.80
  -3 -13  -2    3.70    2.80
   3  13   2    5.20    3.10
   3  13   2    2.50    2.80
 -15  14   2    6.50    4.60
 -15  14   2    3.50    3.10
 -15  14   2    3.90    2.20
 -14  14   2   14.50    2.70
 -14  14   2    6.30    3.30
 -14  14   2   15.20    4.70
 -13  14   2    5.40    4.50
 -13  14   2    0.90    3.00
 -13  14   2    2.70    2.10
 -12  14   2   32.20    5.50
 -12  14   2   18.40    3.90
 -12  14   2   17.90    2.80
 -11  14   2    5.30    3.80
 -11  14   2    1.30    2.70
 -11  14   2    3.50    2.10
 -10  14   2    5.90    3.10
 -10  14   2    4.00    2.00
 -10  14   2    4.30    3.90
  -9  14   2    0.80    2.70
  -9  14   2    4.40    3.80
  -9  14   2    2.40    1.90
  -8  14   2   24.40    4.70
  -8  14   2   16.30    3.50
  -8  14   2   22.10    3.30
  -7  14   2   19.70    3.60
  -7  14   2   22.70    4.30
  -7  14   2   18.60    2.80
  -6  14   2    3.80    2.80
  -6  14   2    2.10    2.20
  -5  14   2    8.70    3.40
  -5  14   2    6.60    2.40
  -4  14   2   -0.30    2.70
  -4  14   2    3.80    2.40
   3 -14  -2   12.50    2.60
  -3  14   2   11.60    3.20
  -3  14   2   11.00    2.90
   2 -14  -2    2.40    2.30
  -2  14   2    1.30    2.40
  -2  14   2    0.00    2.60
   1 -14  -2    2.90    2.30
  -1  14   2    2.00    3.10
  -1  14   2    3.90    2.60
   0 -14  -2   13.40    3.20
   0  14   2    7.40    3.20
   0  14   2    9.60    3.00
  -1 -14  -2    1.00    2.60
   1  14   2   -1.50    2.70
   1  14   2    0.40    2.40
  -2 -14  -2    2.50    3.10
   2  14   2    1.40    2.90
   2  14   2    5.50    3.20
 -15  15   2   -0.60    3.10
 -15  15   2    5.20    4.80
 -15  15   2    1.90    2.00
 -14  15   2    1.40    4.30
 -14  15   2    1.10    1.90
 -14  15   2    4.50    3.30
 -13  15   2    1.20    3.00
 -13  15   2    2.00    2.00
 -13  15   2    5.50    4.20
 -12  15   2    3.20    3.80
 -12  15   2   -0.90    3.00
 -12  15   2    5.00    2.10
 -11  15   2    2.00    2.00
 -11  15   2    0.40    2.90
 -11  15   2    6.40    4.00
 -10  15   2    8.30    4.10
 -10  15   2    2.50    2.10
 -10  15   2    3.30    3.00
  -9  15   2    8.30    3.30
  -9  15   2   10.00    2.50
  -9  15   2   14.30    4.40
  -8  15   2   21.00    4.10
  -8  15   2   17.00    2.80
  -7  15   2   23.90    4.20
  -7  15   2   30.80    3.50
  -6  15   2   11.40    2.70
  -6  15   2    9.40    3.30
  -5  15   2    1.90    2.20
  -5  15   2    4.00    3.00
  -4  15   2    0.10    2.20
  -4  15   2    3.40    2.80
   3 -15  -2    2.30    2.40
  -3  15   2    0.90    2.80
  -3  15   2    1.30    2.20
   2 -15  -2    3.80    2.60
  -2  15   2    6.00    3.10
  -2  15   2    8.40    2.80
   1 -15  -2   -3.00    2.60
  -1  15   2    2.90    2.90
  -1  15   2   -2.40    2.70
   0 -15  -2    1.50    2.90
   0  15   2   -1.60    2.30
   0  15   2    3.00    3.30
 -13  16   2   10.70    4.80
 -13  16   2    0.10    3.10
 -13  16   2    2.20    2.10
 -12  16   2   -3.60    2.80
 -12  16   2    2.10    1.90
 -12  16   2    9.40    4.40
 -11  16   2    7.60    4.20
 -11  16   2    0.90    3.20
 -11  16   2    1.90    2.00
 -10  16   2    7.00    2.20
 -10  16   2   -0.60    3.00
  -9  16   2    0.00    2.90
  -9  16   2    3.00    2.10
  -8  16   2    7.50    2.40
  -8  16   2    4.90    3.30
  -7  16   2    1.40    3.00
  -7  16   2    3.50    2.40
  -6  16   2    5.70    2.50
  -6  16   2    2.70    3.10
  -5  16   2    5.30    2.50
  -5  16   2    4.40    3.00
  -4  16   2   -0.60    2.30
  -4  16   2    2.70    3.00
  -3  16   2   -1.60    2.80
  -3  16   2    1.10    2.60
  -2  16   2    1.10    3.40
  -2  16   2   -0.80    2.50
 -11  17   2    5.40    2.30
 -11  17   2    1.40    3.30
 -10  17   2    3.60    3.30
 -10  17   2    3.50    2.30
  -9  17   2   -3.00    3.30
  -9  17   2    4.70    2.30
  -8  17   2    3.90    3.40
  -8  17   2    2.40    2.40
  -7  17   2    5.10    2.50
  -7  17   2    2.80    3.10
  -6  17   2    3.50    2.60
  -6  17   2   -0.50    3.40
  -3  17  -3   22.40    4.50
  -4  17  -3    4.70    3.20
  -4  17  -3    1.70    2.20
  -5  17  -3    3.00    2.20
  -5  17  -3   -0.60    2.80
  -6  17  -3    3.60    3.10
  -6  17  -3    4.40    2.10
  -7  17  -3    0.80    3.00
  -7  17  -3    1.30    1.90
  -8  17  -3   -0.50    2.70
  -8  17  -3    0.80    1.70
  -9  17  -3   -0.60    3.00
  -9  17  -3    2.80    1.80
 -10  17  -3    3.00    3.00
 -10  17  -3   -1.00    1.50
 -11  17  -3    3.70    3.40
 -11  17  -3    6.20    1.70
 -12  17  -3    4.00    1.60
 -12  17  -3    0.00    3.10
  -1  16  -3   -2.10    2.20
  -1  16  -3    5.30    3.10
  -2  16  -3    3.60    2.30
  -2  16  -3    7.40    3.30
  -3  16  -3   -1.50    2.00
  -3  16  -3    3.40    2.80
  -4  16  -3    3.80    3.00
  -4  16  -3   -0.70    2.00
  -5  16  -3   10.10    2.40
  -5  16  -3   10.70    3.60
  -6  16  -3   -1.70    2.90
  -6  16  -3    1.00    1.90
  -7  16  -3   17.20    3.90
  -7  16  -3   19.70    2.80
  -8  16  -3    1.80    1.70
  -8  16  -3    3.20    2.80
  -9  16  -3    0.00    1.60
  -9  16  -3   -1.30    2.70
 -10  16  -3    7.70    1.80
 -10  16  -3    8.60    3.50
 -11  16  -3    2.50    3.40
 -11  16  -3    1.90    1.50
 -12  16  -3   14.80    4.10
 -12  16  -3   27.60    4.90
 -12  16  -3   18.70    2.40
 -13  16  -3    2.20    3.20
 -13  16  -3    4.10    1.40
 -13  16  -3   15.70    4.40
 -14  16  -3    6.00    1.50
 -14  16  -3    0.90    3.30
   1  15  -3    2.60    3.20
   1  15  -3    5.40    2.90
  -1 -15   3   14.40    3.40
   0  15  -3   -0.20    2.20
   0  15  -3   -5.50    2.50
   0 -15   3    1.10    2.60
  -1  15  -3   -0.40    2.10
  -1  15  -3    5.20    3.00
  -2  15  -3    4.80    3.00
  -2  15  -3   -1.50    2.00
  -3  15  -3    4.20    2.20
  -3  15  -3    7.20    3.10
  -4  15  -3    7.40    2.30
  -4  15  -3    8.20    3.20
  -5  15  -3    1.20    2.70
  -5  15  -3    0.10    1.80
  -6  15  -3    1.00    2.70
  -6  15  -3    0.10    1.70
  -7  15  -3    1.10    1.60
  -7  15  -3    3.00    3.00
  -8  15  -3   17.80    3.90
  -8  15  -3   13.00    2.00
  -9  15  -3   -1.80    2.70
  -9  15  -3    0.20    3.60
  -9  15  -3    0.60    1.60
 -10  15  -3   13.30    3.50
 -10  15  -3   15.90    2.40
 -10  15  -3   23.80    4.20
 -11  15  -3   17.20    2.30
 -11  15  -3   33.10    5.00
 -11  15  -3   20.00    3.80
 -12  15  -3    2.30    3.60
 -12  15  -3    1.20    1.40
 -12  15  -3    1.10    2.90
 -13  15  -3    5.10    1.50
 -13  15  -3    9.20    4.20
 -13  15  -3   -0.40    2.80
 -14  15  -3    1.60    1.30
 -14  15  -3   11.30    4.40
 -14  15  -3    0.90    3.00
 -15  15  -3    8.70    1.60
 -15  15  -3   14.20    5.10
 -15  15  -3    2.20    3.20
   3  14  -3   -5.30    3.10
   3  14  -3   -2.90    2.50
  -3 -14   3    3.90    3.00
   2  14  -3    2.60    2.60
   2  14  -3    5.50    3.50
  -2 -14   3    5.30    2.90
   1  14  -3    3.30    2.40
   1  14  -3    3.00    2.90
  -1 -14   3    9.40    2.90
[truncated: 2,749,385 more chars]
