# Supplementary material for: A crystalline monosubstituted carbene
Source: Springer Nature journal article supplement (doi:10.1038/s41557-018-0153-1), 2018-10-05
Supplement: 41557_2018_153_MOESM82_ESM.mol [file 41557_2018_153_MOESM82_ESM.mol]

nchem.18010067C-comp10.mol
  ChemDraw09031813462D

306334  0  0  1  0  0  0  0  0999 V2000
   -7.0750   -0.2527    0.0000 C   0  0  0  0  0  0  0  0  0  0  0  0
   -7.0750    1.0822    0.0000 C   0  0  0  0  0  0  0  0  0  0  0  0
   -7.8596    0.8273    0.0000 C   0  0  0  0  0  0  0  0  0  0  0  0
   -8.5741    1.2398    0.0000 C   0  0  0  0  0  0  0  0  0  0  0  0
   -9.2886    0.8273    0.0000 C   0  0  0  0  0  0  0  0  0  0  0  0
   -9.2886    0.0023    0.0000 C   0  0  0  0  0  0  0  0  0  0  0  0
   -8.5741   -0.4102    0.0000 C   0  0  0  0  0  0  0  0  0  0  0  0
   -7.8596    0.0023    0.0000 C   0  0  0  0  0  0  0  0  0  0  0  0
   -8.9670    4.0751    0.0000 C   0  0  0  0  0  0  0  0  0  0  0  0
   -8.3146    4.5800    0.0000 C   0  0  0  0  0  0  0  0  0  0  0  0
   -8.4256    5.3975    0.0000 C   0  0  0  0  0  0  0  0  0  0  0  0
   -9.1891    5.7101    0.0000 C   0  0  0  0  0  0  0  0  0  0  0  0
   -9.8415    5.2052    0.0000 C   0  0  0  0  0  0  0  0  0  0  0  0
   -9.7305    4.3877    0.0000 C   0  0  0  0  0  0  0  0  0  0  0  0
   -8.8811    3.4589    0.0000 C   0  0  0  0  0  0  0  0  0  0  0  0
   -9.5807    3.0217    0.0000 C   0  0  0  0  0  0  0  0  0  0  0  0
   -9.5519    2.1972    0.0000 C   0  0  0  0  0  0  0  0  0  0  0  0
   -8.8235    1.8099    0.0000 C   0  0  0  0  0  0  0  0  0  0  0  0
   -8.1239    2.2471    0.0000 C   0  0  0  0  0  0  0  0  0  0  0  0
   -8.1527    3.0716    0.0000 C   0  0  0  0  0  0  0  0  0  0  0  0
  -10.2516    1.7600    0.0000 C   0  0  0  0  0  0  0  0  0  0  0  0
  -10.9800    2.1474    0.0000 C   0  0  0  0  0  0  0  0  0  0  0  0
  -11.6796    1.7102    0.0000 C   0  0  0  0  0  0  0  0  0  0  0  0
  -11.6509    0.8857    0.0000 C   0  0  0  0  0  0  0  0  0  0  0  0
  -10.9224    0.4984    0.0000 C   0  0  0  0  0  0  0  0  0  0  0  0
  -10.2228    0.9355    0.0000 C   0  0  0  0  0  0  0  0  0  0  0  0
   -3.1260    2.9850    0.0000 C   0  0  0  0  0  0  0  0  0  0  0  0
   -2.8344    2.2133    0.0000 C   0  0  0  0  0  0  0  0  0  0  0  0
   -2.0203    2.0799    0.0000 C   0  0  0  0  0  0  0  0  0  0  0  0
   -1.4977    2.7182    0.0000 C   0  0  0  0  0  0  0  0  0  0  0  0
   -1.7893    3.4900    0.0000 C   0  0  0  0  0  0  0  0  0  0  0  0
   -2.6034    3.6234    0.0000 C   0  0  0  0  0  0  0  0  0  0  0  0
   -3.9401    3.1184    0.0000 C   0  0  0  0  0  0  0  0  0  0  0  0
   -4.0932    3.9291    0.0000 C   0  0  0  0  0  0  0  0  0  0  0  0
   -4.8719    4.2018    0.0000 C   0  0  0  0  0  0  0  0  0  0  0  0
   -5.4974    3.6639    0.0000 C   0  0  0  0  0  0  0  0  0  0  0  0
   -5.3443    2.8532    0.0000 C   0  0  0  0  0  0  0  0  0  0  0  0
   -4.5656    2.5805    0.0000 C   0  0  0  0  0  0  0  0  0  0  0  0
   -4.9377    4.8669    0.0000 C   0  0  0  0  0  0  0  0  0  0  0  0
   -5.7010    5.1802    0.0000 C   0  0  0  0  0  0  0  0  0  0  0  0
   -5.8113    5.9978    0.0000 C   0  0  0  0  0  0  0  0  0  0  0  0
   -5.1584    6.5021    0.0000 C   0  0  0  0  0  0  0  0  0  0  0  0
   -4.3952    6.1889    0.0000 C   0  0  0  0  0  0  0  0  0  0  0  0
   -4.2849    5.3713    0.0000 C   0  0  0  0  0  0  0  0  0  0  0  0
   -4.9566   -4.8948    0.0000 C   0  0  0  0  0  0  0  0  0  0  0  0
   -4.4127   -5.5151    0.0000 C   0  0  0  0  0  0  0  0  0  0  0  0
   -4.6780   -6.2963    0.0000 C   0  0  0  0  0  0  0  0  0  0  0  0
   -5.4872   -6.4571    0.0000 C   0  0  0  0  0  0  0  0  0  0  0  0
   -6.0310   -5.8368    0.0000 C   0  0  0  0  0  0  0  0  0  0  0  0
   -5.7658   -5.0556    0.0000 C   0  0  0  0  0  0  0  0  0  0  0  0
   -4.7121   -4.2300    0.0000 C   0  0  0  0  0  0  0  0  0  0  0  0
   -3.9042   -4.0632    0.0000 C   0  0  0  0  0  0  0  0  0  0  0  0
   -3.6447   -3.2801    0.0000 C   0  0  0  0  0  0  0  0  0  0  0  0
   -4.1931   -2.6638    0.0000 C   0  0  0  0  0  0  0  0  0  0  0  0
   -5.0011   -2.8306    0.0000 C   0  0  0  0  0  0  0  0  0  0  0  0
   -5.2606   -3.6137    0.0000 C   0  0  0  0  0  0  0  0  0  0  0  0
   -2.8995   -3.2404    0.0000 C   0  0  0  0  0  0  0  0  0  0  0  0
   -2.4664   -3.9426    0.0000 C   0  0  0  0  0  0  0  0  0  0  0  0
   -1.6417   -3.9186    0.0000 C   0  0  0  0  0  0  0  0  0  0  0  0
   -1.2502   -3.1924    0.0000 C   0  0  0  0  0  0  0  0  0  0  0  0
   -1.6833   -2.4902    0.0000 C   0  0  0  0  0  0  0  0  0  0  0  0
   -2.5079   -2.5142    0.0000 C   0  0  0  0  0  0  0  0  0  0  0  0
  -10.9868   -1.5415    0.0000 C   0  0  0  0  0  0  0  0  0  0  0  0
  -11.0447   -0.7185    0.0000 C   0  0  0  0  0  0  0  0  0  0  0  0
  -11.7863   -0.3572    0.0000 C   0  0  0  0  0  0  0  0  0  0  0  0
  -12.4701   -0.8188    0.0000 C   0  0  0  0  0  0  0  0  0  0  0  0
  -12.4122   -1.6417    0.0000 C   0  0  0  0  0  0  0  0  0  0  0  0
  -11.6706   -2.0031    0.0000 C   0  0  0  0  0  0  0  0  0  0  0  0
  -10.2451   -1.9028    0.0000 C   0  0  0  0  0  0  0  0  0  0  0  0
  -10.1873   -2.7258    0.0000 C   0  0  0  0  0  0  0  0  0  0  0  0
   -9.4456   -3.0872    0.0000 C   0  0  0  0  0  0  0  0  0  0  0  0
   -8.7618   -2.6256    0.0000 C   0  0  0  0  0  0  0  0  0  0  0  0
   -8.8197   -1.8026    0.0000 C   0  0  0  0  0  0  0  0  0  0  0  0
   -9.5614   -1.4412    0.0000 C   0  0  0  0  0  0  0  0  0  0  0  0
   -9.3752   -3.8431    0.0000 C   0  0  0  0  0  0  0  0  0  0  0  0
  -10.0817   -4.2692    0.0000 C   0  0  0  0  0  0  0  0  0  0  0  0
  -10.0659   -5.0940    0.0000 C   0  0  0  0  0  0  0  0  0  0  0  0
   -9.3437   -5.4928    0.0000 C   0  0  0  0  0  0  0  0  0  0  0  0
   -8.6372   -5.0668    0.0000 C   0  0  0  0  0  0  0  0  0  0  0  0
   -8.6530   -4.2419    0.0000 C   0  0  0  0  0  0  0  0  0  0  0  0
   -6.5901    0.4148    0.0000 N   0  0  0  0  0  0  0  0  0  0  0  0
   -5.7651    0.4148    0.0000 C   0  0  0  0  0  0  0  0  0  0  0  0
   -5.5517    1.2111    0.0000 H   0  0  0  0  0  0  0  0  0  0  0  0
   -5.6025   -0.3945    0.0000 C   0  0  0  0  0  0  0  0  0  0  0  0
   -4.9838    0.1512    0.0000 C   0  0  0  0  0  0  0  0  0  0  0  0
   -5.4399   -1.2030    0.0000 C   0  0  0  0  0  0  0  0  0  0  0  0
   -4.6586   -1.4665    0.0000 C   0  0  0  0  0  0  0  0  0  0  0  0
   -4.0392   -0.9215    0.0000 C   0  0  0  0  0  0  0  0  0  0  0  0
   -4.2017   -0.1123    0.0000 C   0  0  0  0  0  0  0  0  0  0  0  0
  -10.8936   -0.3261    0.0000 C   0  0  0  0  0  0  0  0  0  0  0  0
  -11.7144   -0.3548    0.0000 F   0  0  0  0  0  0  0  0  0  0  0  0
  -10.8650   -1.1469    0.0000 F   0  0  0  0  0  0  0  0  0  0  0  0
  -10.0729   -0.2975    0.0000 F   0  0  0  0  0  0  0  0  0  0  0  0
  -10.6050    5.5178    0.0000 C   0  0  0  0  0  0  0  0  0  0  0  0
  -10.2939    6.2778    0.0000 F   0  0  0  0  0  0  0  0  0  0  0  0
  -11.3651    5.8289    0.0000 F   0  0  0  0  0  0  0  0  0  0  0  0
  -10.9162    4.7577    0.0000 F   0  0  0  0  0  0  0  0  0  0  0  0
  -12.4081    2.0975    0.0000 C   0  0  0  0  0  0  0  0  0  0  0  0
  -12.0225    2.8226    0.0000 F   0  0  0  0  0  0  0  0  0  0  0  0
  -13.1332    2.4831    0.0000 F   0  0  0  0  0  0  0  0  0  0  0  0
  -12.7936    1.3724    0.0000 F   0  0  0  0  0  0  0  0  0  0  0  0
   -7.7776    5.9029    0.0000 C   0  0  0  0  0  0  0  0  0  0  0  0
   -7.2725    5.2553    0.0000 F   0  0  0  0  0  0  0  0  0  0  0  0
   -7.1300    6.4079    0.0000 F   0  0  0  0  0  0  0  0  0  0  0  0
   -8.2826    6.5505    0.0000 F   0  0  0  0  0  0  0  0  0  0  0  0
   -3.7423    6.6932    0.0000 C   0  0  0  0  0  0  0  0  0  0  0  0
   -3.2403    6.0433    0.0000 F   0  0  0  0  0  0  0  0  0  0  0  0
   -3.0924    7.1953    0.0000 F   0  0  0  0  0  0  0  0  0  0  0  0
   -4.2444    7.3432    0.0000 F   0  0  0  0  0  0  0  0  0  0  0  0
   -1.2667    4.1284    0.0000 C   0  0  0  0  0  0  0  0  0  0  0  0
   -0.6312    3.6082    0.0000 F   0  0  0  0  0  0  0  0  0  0  0  0
   -0.7464    4.7639    0.0000 F   0  0  0  0  0  0  0  0  0  0  0  0
   -1.9021    4.6486    0.0000 F   0  0  0  0  0  0  0  0  0  0  0  0
   -6.5745    6.3110    0.0000 C   0  0  0  0  0  0  0  0  0  0  0  0
   -6.2627    7.0708    0.0000 F   0  0  0  0  0  0  0  0  0  0  0  0
   -7.3343    6.6228    0.0000 F   0  0  0  0  0  0  0  0  0  0  0  0
   -6.8864    5.5512    0.0000 F   0  0  0  0  0  0  0  0  0  0  0  0
   -1.7287    1.3081    0.0000 C   0  0  0  0  0  0  0  0  0  0  0  0
   -2.4970    1.0179    0.0000 F   0  0  0  0  0  0  0  0  0  0  0  0
   -1.4385    0.5398    0.0000 F   0  0  0  0  0  0  0  0  0  0  0  0
   -0.9605    1.5983    0.0000 F   0  0  0  0  0  0  0  0  0  0  0  0
   -1.2917   -1.7641    0.0000 C   0  0  0  0  0  0  0  0  0  0  0  0
   -0.5688   -2.1538    0.0000 F   0  0  0  0  0  0  0  0  0  0  0  0
   -0.9020   -1.0412    0.0000 F   0  0  0  0  0  0  0  0  0  0  0  0
   -2.0146   -1.3743    0.0000 F   0  0  0  0  0  0  0  0  0  0  0  0
   -6.8402   -5.9977    0.0000 C   0  0  0  0  0  0  0  0  0  0  0  0
   -7.0003   -5.1921    0.0000 F   0  0  0  0  0  0  0  0  0  0  0  0
   -7.6457   -6.1578    0.0000 F   0  0  0  0  0  0  0  0  0  0  0  0
   -6.6801   -6.8032    0.0000 F   0  0  0  0  0  0  0  0  0  0  0  0
   -1.2086   -4.6207    0.0000 C   0  0  0  0  0  0  0  0  0  0  0  0
   -1.9076   -5.0519    0.0000 F   0  0  0  0  0  0  0  0  0  0  0  0
   -0.7774   -5.3197    0.0000 F   0  0  0  0  0  0  0  0  0  0  0  0
   -0.5096   -4.1896    0.0000 F   0  0  0  0  0  0  0  0  0  0  0  0
   -4.1341   -6.9166    0.0000 C   0  0  0  0  0  0  0  0  0  0  0  0
   -4.7516   -7.4580    0.0000 F   0  0  0  0  0  0  0  0  0  0  0  0
   -3.5927   -7.5341    0.0000 F   0  0  0  0  0  0  0  0  0  0  0  0
   -3.5166   -6.3752    0.0000 F   0  0  0  0  0  0  0  0  0  0  0  0
   -7.9150   -5.4655    0.0000 C   0  0  0  0  0  0  0  0  0  0  0  0
   -8.3120   -6.1845    0.0000 F   0  0  0  0  0  0  0  0  0  0  0  0
   -7.1961   -5.8625    0.0000 F   0  0  0  0  0  0  0  0  0  0  0  0
   -7.5180   -4.7466    0.0000 F   0  0  0  0  0  0  0  0  0  0  0  0
  -13.0960   -2.1033    0.0000 C   0  0  0  0  0  0  0  0  0  0  0  0
  -13.5555   -1.4227    0.0000 F   0  0  0  0  0  0  0  0  0  0  0  0
  -13.7767   -2.5629    0.0000 F   0  0  0  0  0  0  0  0  0  0  0  0
  -12.6365   -2.7840    0.0000 F   0  0  0  0  0  0  0  0  0  0  0  0
  -10.7724   -5.5201    0.0000 C   0  0  0  0  0  0  0  0  0  0  0  0
  -11.1965   -4.8168    0.0000 F   0  0  0  0  0  0  0  0  0  0  0  0
  -11.4757   -5.9442    0.0000 F   0  0  0  0  0  0  0  0  0  0  0  0
  -10.3483   -6.2234    0.0000 F   0  0  0  0  0  0  0  0  0  0  0  0
  -11.8442    0.4658    0.0000 C   0  0  0  0  0  0  0  0  0  0  0  0
  -11.0250    0.5234    0.0000 F   0  0  0  0  0  0  0  0  0  0  0  0
  -11.9018    1.2851    0.0000 F   0  0  0  0  0  0  0  0  0  0  0  0
  -12.6634    0.4082    0.0000 F   0  0  0  0  0  0  0  0  0  0  0  0
    7.2113   -0.0617    0.0000 C   0  0  0  0  0  0  0  0  0  0  0  0
    7.2113    1.2732    0.0000 C   0  0  0  0  0  0  0  0  0  0  0  0
    6.4266    1.0183    0.0000 C   0  0  0  0  0  0  0  0  0  0  0  0
    5.7122    1.4308    0.0000 C   0  0  0  0  0  0  0  0  0  0  0  0
    4.9977    1.0183    0.0000 C   0  0  0  0  0  0  0  0  0  0  0  0
    4.9977    0.1933    0.0000 C   0  0  0  0  0  0  0  0  0  0  0  0
    5.7122   -0.2192    0.0000 C   0  0  0  0  0  0  0  0  0  0  0  0
    6.4266    0.1933    0.0000 C   0  0  0  0  0  0  0  0  0  0  0  0
    5.3193    4.2661    0.0000 C   0  0  0  0  0  0  0  0  0  0  0  0
    5.9717    4.7710    0.0000 C   0  0  0  0  0  0  0  0  0  0  0  0
    5.8607    5.5885    0.0000 C   0  0  0  0  0  0  0  0  0  0  0  0
    5.0972    5.9011    0.0000 C   0  0  0  0  0  0  0  0  0  0  0  0
    4.4447    5.3962    0.0000 C   0  0  0  0  0  0  0  0  0  0  0  0
    4.5558    4.5787    0.0000 C   0  0  0  0  0  0  0  0  0  0  0  0
    5.4052    3.6499    0.0000 C   0  0  0  0  0  0  0  0  0  0  0  0
    4.7055    3.2127    0.0000 C   0  0  0  0  0  0  0  0  0  0  0  0
    4.7343    2.3882    0.0000 C   0  0  0  0  0  0  0  0  0  0  0  0
    5.4628    2.0009    0.0000 C   0  0  0  0  0  0  0  0  0  0  0  0
    6.1624    2.4381    0.0000 C   0  0  0  0  0  0  0  0  0  0  0  0
    6.1336    3.2626    0.0000 C   0  0  0  0  0  0  0  0  0  0  0  0
    4.0347    1.9510    0.0000 C   0  0  0  0  0  0  0  0  0  0  0  0
    3.3063    2.3384    0.0000 C   0  0  0  0  0  0  0  0  0  0  0  0
    2.6066    1.9012    0.0000 C   0  0  0  0  0  0  0  0  0  0  0  0
    2.6354    1.0767    0.0000 C   0  0  0  0  0  0  0  0  0  0  0  0
    3.3638    0.6894    0.0000 C   0  0  0  0  0  0  0  0  0  0  0  0
    4.0635    1.1265    0.0000 C   0  0  0  0  0  0  0  0  0  0  0  0
   11.1603    3.1760    0.0000 C   0  0  0  0  0  0  0  0  0  0  0  0
   11.4518    2.4043    0.0000 C   0  0  0  0  0  0  0  0  0  0  0  0
   12.2660    2.2709    0.0000 C   0  0  0  0  0  0  0  0  0  0  0  0
   12.7886    2.9092    0.0000 C   0  0  0  0  0  0  0  0  0  0  0  0
   12.4970    3.6810    0.0000 C   0  0  0  0  0  0  0  0  0  0  0  0
   11.6829    3.8144    0.0000 C   0  0  0  0  0  0  0  0  0  0  0  0
   10.3461    3.3094    0.0000 C   0  0  0  0  0  0  0  0  0  0  0  0
   10.1930    4.1201    0.0000 C   0  0  0  0  0  0  0  0  0  0  0  0
    9.4144    4.3928    0.0000 C   0  0  0  0  0  0  0  0  0  0  0  0
    8.7889    3.8549    0.0000 C   0  0  0  0  0  0  0  0  0  0  0  0
    8.9420    3.0442    0.0000 C   0  0  0  0  0  0  0  0  0  0  0  0
    9.7206    2.7715    0.0000 C   0  0  0  0  0  0  0  0  0  0  0  0
    9.3485    5.0579    0.0000 C   0  0  0  0  0  0  0  0  0  0  0  0
    8.5853    5.3712    0.0000 C   0  0  0  0  0  0  0  0  0  0  0  0
    8.4750    6.1887    0.0000 C   0  0  0  0  0  0  0  0  0  0  0  0
    9.1278    6.6931    0.0000 C   0  0  0  0  0  0  0  0  0  0  0  0
    9.8911    6.3799    0.0000 C   0  0  0  0  0  0  0  0  0  0  0  0
   10.0014    5.5623    0.0000 C   0  0  0  0  0  0  0  0  0  0  0  0
    9.3297   -4.7038    0.0000 C   0  0  0  0  0  0  0  0  0  0  0  0
    9.8736   -5.3241    0.0000 C   0  0  0  0  0  0  0  0  0  0  0  0
    9.6083   -6.1053    0.0000 C   0  0  0  0  0  0  0  0  0  0  0  0
    8.7991   -6.2661    0.0000 C   0  0  0  0  0  0  0  0  0  0  0  0
    8.2552   -5.6458    0.0000 C   0  0  0  0  0  0  0  0  0  0  0  0
    8.5205   -4.8646    0.0000 C   0  0  0  0  0  0  0  0  0  0  0  0
    9.5742   -4.0390    0.0000 C   0  0  0  0  0  0  0  0  0  0  0  0
   10.3821   -3.8722    0.0000 C   0  0  0  0  0  0  0  0  0  0  0  0
   10.6416   -3.0891    0.0000 C   0  0  0  0  0  0  0  0  0  0  0  0
   10.0932   -2.4728    0.0000 C   0  0  0  0  0  0  0  0  0  0  0  0
    9.2852   -2.6396    0.0000 C   0  0  0  0  0  0  0  0  0  0  0  0
    9.0257   -3.4227    0.0000 C   0  0  0  0  0  0  0  0  0  0  0  0
   11.3868   -3.0494    0.0000 C   0  0  0  0  0  0  0  0  0  0  0  0
   11.8199   -3.7516    0.0000 C   0  0  0  0  0  0  0  0  0  0  0  0
   12.6446   -3.7276    0.0000 C   0  0  0  0  0  0  0  0  0  0  0  0
   13.0361   -3.0014    0.0000 C   0  0  0  0  0  0  0  0  0  0  0  0
   12.6030   -2.2992    0.0000 C   0  0  0  0  0  0  0  0  0  0  0  0
   11.7784   -2.3232    0.0000 C   0  0  0  0  0  0  0  0  0  0  0  0
    3.2995   -1.3505    0.0000 C   0  0  0  0  0  0  0  0  0  0  0  0
    3.2416   -0.5275    0.0000 C   0  0  0  0  0  0  0  0  0  0  0  0
    2.5000   -0.1662    0.0000 C   0  0  0  0  0  0  0  0  0  0  0  0
    1.8162   -0.6278    0.0000 C   0  0  0  0  0  0  0  0  0  0  0  0
    1.8741   -1.4507    0.0000 C   0  0  0  0  0  0  0  0  0  0  0  0
    2.6157   -1.8121    0.0000 C   0  0  0  0  0  0  0  0  0  0  0  0
    4.0411   -1.7119    0.0000 C   0  0  0  0  0  0  0  0  0  0  0  0
    4.0990   -2.5348    0.0000 C   0  0  0  0  0  0  0  0  0  0  0  0
    4.8407   -2.8962    0.0000 C   0  0  0  0  0  0  0  0  0  0  0  0
    5.5244   -2.4346    0.0000 C   0  0  0  0  0  0  0  0  0  0  0  0
    5.4665   -1.6116    0.0000 C   0  0  0  0  0  0  0  0  0  0  0  0
    4.7249   -1.2502    0.0000 C   0  0  0  0  0  0  0  0  0  0  0  0
    4.9111   -3.6521    0.0000 C   0  0  0  0  0  0  0  0  0  0  0  0
    4.2046   -4.0782    0.0000 C   0  0  0  0  0  0  0  0  0  0  0  0
    4.2203   -4.9030    0.0000 C   0  0  0  0  0  0  0  0  0  0  0  0
    4.9426   -5.3018    0.0000 C   0  0  0  0  0  0  0  0  0  0  0  0
    5.6490   -4.8758    0.0000 C   0  0  0  0  0  0  0  0  0  0  0  0
    5.6333   -4.0509    0.0000 C   0  0  0  0  0  0  0  0  0  0  0  0
    7.6962    0.6058    0.0000 N   0  0  0  0  0  0  0  0  0  0  0  0
    8.5212    0.6058    0.0000 C   0  0  0  0  0  0  0  0  0  0  0  0
    8.7346    1.4021    0.0000 H   0  0  0  0  0  0  0  0  0  0  0  0
    8.6838   -0.2035    0.0000 C   0  0  0  0  0  0  0  0  0  0  0  0
    9.3025    0.3422    0.0000 C   0  0  0  0  0  0  0  0  0  0  0  0
    8.8463   -1.0120    0.0000 C   0  0  0  0  0  0  0  0  0  0  0  0
    9.6276   -1.2755    0.0000 C   0  0  0  0  0  0  0  0  0  0  0  0
   10.2471   -0.7306    0.0000 C   0  0  0  0  0  0  0  0  0  0  0  0
   10.0845    0.0787    0.0000 C   0  0  0  0  0  0  0  0  0  0  0  0
    3.3926   -0.1351    0.0000 C   0  0  0  0  0  0  0  0  0  0  0  0
    2.5719   -0.1638    0.0000 F   0  0  0  0  0  0  0  0  0  0  0  0
    3.4213   -0.9559    0.0000 F   0  0  0  0  0  0  0  0  0  0  0  0
    4.2134   -0.1065    0.0000 F   0  0  0  0  0  0  0  0  0  0  0  0
    3.6812    5.7088    0.0000 C   0  0  0  0  0  0  0  0  0  0  0  0
    3.9924    6.4688    0.0000 F   0  0  0  0  0  0  0  0  0  0  0  0
    2.9212    6.0199    0.0000 F   0  0  0  0  0  0  0  0  0  0  0  0
    3.3701    4.9487    0.0000 F   0  0  0  0  0  0  0  0  0  0  0  0
    1.8782    2.2885    0.0000 C   0  0  0  0  0  0  0  0  0  0  0  0
    2.2638    3.0136    0.0000 F   0  0  0  0  0  0  0  0  0  0  0  0
    1.1531    2.6740    0.0000 F   0  0  0  0  0  0  0  0  0  0  0  0
    1.4926    1.5633    0.0000 F   0  0  0  0  0  0  0  0  0  0  0  0
    6.5087    6.0939    0.0000 C   0  0  0  0  0  0  0  0  0  0  0  0
    7.0137    5.4463    0.0000 F   0  0  0  0  0  0  0  0  0  0  0  0
    7.1563    6.5989    0.0000 F   0  0  0  0  0  0  0  0  0  0  0  0
    6.0036    6.7415    0.0000 F   0  0  0  0  0  0  0  0  0  0  0  0
   10.5439    6.8842    0.0000 C   0  0  0  0  0  0  0  0  0  0  0  0
   11.0460    6.2343    0.0000 F   0  0  0  0  0  0  0  0  0  0  0  0
   11.1939    7.3863    0.0000 F   0  0  0  0  0  0  0  0  0  0  0  0
   10.0419    7.5341    0.0000 F   0  0  0  0  0  0  0  0  0  0  0  0
   13.0196    4.3194    0.0000 C   0  0  0  0  0  0  0  0  0  0  0  0
   13.6551    3.7992    0.0000 F   0  0  0  0  0  0  0  0  0  0  0  0
   13.5398    4.9549    0.0000 F   0  0  0  0  0  0  0  0  0  0  0  0
   12.3841    4.8396    0.0000 F   0  0  0  0  0  0  0  0  0  0  0  0
    7.7117    6.5020    0.0000 C   0  0  0  0  0  0  0  0  0  0  0  0
    8.0236    7.2617    0.0000 F   0  0  0  0  0  0  0  0  0  0  0  0
    6.9520    6.8138    0.0000 F   0  0  0  0  0  0  0  0  0  0  0  0
    7.3999    5.7422    0.0000 F   0  0  0  0  0  0  0  0  0  0  0  0
   12.5575    1.4991    0.0000 C   0  0  0  0  0  0  0  0  0  0  0  0
   11.7893    1.2089    0.0000 F   0  0  0  0  0  0  0  0  0  0  0  0
   12.8478    0.7308    0.0000 F   0  0  0  0  0  0  0  0  0  0  0  0
   13.3258    1.7893    0.0000 F   0  0  0  0  0  0  0  0  0  0  0  0
   12.9945   -1.5731    0.0000 C   0  0  0  0  0  0  0  0  0  0  0  0
   13.7174   -1.9628    0.0000 F   0  0  0  0  0  0  0  0  0  0  0  0
   13.3843   -0.8502    0.0000 F   0  0  0  0  0  0  0  0  0  0  0  0
   12.2717   -1.1833    0.0000 F   0  0  0  0  0  0  0  0  0  0  0  0
    7.4461   -5.8067    0.0000 C   0  0  0  0  0  0  0  0  0  0  0  0
    7.2859   -5.0012    0.0000 F   0  0  0  0  0  0  0  0  0  0  0  0
    6.6406   -5.9668    0.0000 F   0  0  0  0  0  0  0  0  0  0  0  0
    7.6062   -6.6122    0.0000 F   0  0  0  0  0  0  0  0  0  0  0  0
   13.0777   -4.4297    0.0000 C   0  0  0  0  0  0  0  0  0  0  0  0
   12.3787   -4.8609    0.0000 F   0  0  0  0  0  0  0  0  0  0  0  0
   13.5088   -5.1287    0.0000 F   0  0  0  0  0  0  0  0  0  0  0  0
   13.7767   -3.9986    0.0000 F   0  0  0  0  0  0  0  0  0  0  0  0
   10.1522   -6.7256    0.0000 C   0  0  0  0  0  0  0  0  0  0  0  0
    9.5346   -7.2671    0.0000 F   0  0  0  0  0  0  0  0  0  0  0  0
   10.6936   -7.3432    0.0000 F   0  0  0  0  0  0  0  0  0  0  0  0
   10.7697   -6.1842    0.0000 F   0  0  0  0  0  0  0  0  0  0  0  0
    6.3712   -5.2745    0.0000 C   0  0  0  0  0  0  0  0  0  0  0  0
    5.9743   -5.9935    0.0000 F   0  0  0  0  0  0  0  0  0  0  0  0
    7.0902   -5.6715    0.0000 F   0  0  0  0  0  0  0  0  0  0  0  0
    6.7682   -4.5556    0.0000 F   0  0  0  0  0  0  0  0  0  0  0  0
    1.1903   -1.9123    0.0000 C   0  0  0  0  0  0  0  0  0  0  0  0
    0.7308   -1.2317    0.0000 F   0  0  0  0  0  0  0  0  0  0  0  0
    0.5096   -2.3719    0.0000 F   0  0  0  0  0  0  0  0  0  0  0  0
    1.6498   -2.5930    0.0000 F   0  0  0  0  0  0  0  0  0  0  0  0
    3.5139   -5.3291    0.0000 C   0  0  0  0  0  0  0  0  0  0  0  0
    3.0897   -4.6258    0.0000 F   0  0  0  0  0  0  0  0  0  0  0  0
    2.8106   -5.7532    0.0000 F   0  0  0  0  0  0  0  0  0  0  0  0
    3.9380   -6.0324    0.0000 F   0  0  0  0  0  0  0  0  0  0  0  0
    2.4421    0.6568    0.0000 C   0  0  0  0  0  0  0  0  0  0  0  0
    3.2613    0.7144    0.0000 F   0  0  0  0  0  0  0  0  0  0  0  0
    2.3845    1.4760    0.0000 F   0  0  0  0  0  0  0  0  0  0  0  0
    1.6228    0.5992    0.0000 F   0  0  0  0  0  0  0  0  0  0  0  0
 90 91  1  0      
 90 92  1  0      
 90 93  1  0      
 25 90  1  0      
 94 95  1  0      
 94 96  1  0      
 94 97  1  0      
 13 94  1  0      
 98 99  1  0      
 98100  1  0      
 98101  1  0      
 23 98  1  0      
102103  1  0      
102104  1  0      
102105  1  0      
 11102  1  0      
106107  1  0      
106108  1  0      
106109  1  0      
 43106  1  0      
110111  1  0      
110112  1  0      
110113  1  0      
 31110  1  0      
114115  1  0      
114116  1  0      
114117  1  0      
 41114  1  0      
118119  1  0      
118120  1  0      
118121  1  0      
 29118  1  0      
122123  1  0      
122124  1  0      
122125  1  0      
 61122  1  0      
126127  1  0      
126128  1  0      
126129  1  0      
 49126  1  0      
130131  1  0      
130132  1  0      
130133  1  0      
 59130  1  0      
134135  1  0      
134136  1  0      
134137  1  0      
 47134  1  0      
138139  1  0      
138140  1  0      
138141  1  0      
 79138  1  0      
142143  1  0      
142144  1  0      
142145  1  0      
 67142  1  0      
146147  1  0      
146148  1  0      
146149  1  0      
 77146  1  0      
150151  1  0      
150152  1  0      
150153  1  0      
 65150  1  0      
  1 81  1  0      
 81  2  1  0      
  2  3  1  0      
  3  4  1  0      
  4  5  2  0      
  5  6  1  0      
  6  7  2  0      
  7  8  1  0      
  1  8  1  0      
  3  8  2  0      
  9 10  1  0      
 10 11  2  0      
 11 12  1  0      
 12 13  2  0      
 13 14  1  0      
  9 14  2  0      
 15 16  1  0      
 16 17  2  0      
 17 18  1  0      
 18 19  2  0      
 19 20  1  0      
 15 20  2  0      
  9 15  1  0      
 21 22  1  0      
 22 23  2  0      
 23 24  1  0      
 24 25  2  0      
 25 26  1  0      
 21 26  2  0      
 17 21  1  0      
  2 19  1  0      
 27 28  1  0      
 28 29  2  0      
 29 30  1  0      
 30 31  2  0      
 31 32  1  0      
 27 32  2  0      
 33 34  1  0      
 34 35  2  0      
 35 36  1  0      
 36 37  2  0      
 37 38  1  0      
 33 38  2  0      
 27 33  1  0      
 39 40  1  0      
 40 41  2  0      
 41 42  1  0      
 42 43  2  0      
 43 44  1  0      
 39 44  2  0      
 35 39  1  0      
  2 37  1  0      
 45 46  1  0      
 46 47  2  0      
 47 48  1  0      
 48 49  2  0      
 49 50  1  0      
 45 50  2  0      
 51 52  1  0      
 52 53  2  0      
 53 54  1  0      
 54 55  2  0      
 55 56  1  0      
 51 56  2  0      
 45 51  1  0      
 57 58  1  0      
 58 59  2  0      
 59 60  1  0      
 60 61  2  0      
 61 62  1  0      
 57 62  2  0      
 53 57  1  0      
  1 55  1  0      
 63 64  1  0      
 64 65  2  0      
 65 66  1  0      
 66 67  2  0      
 67 68  1  0      
 63 68  2  0      
 69 70  1  0      
 70 71  2  0      
 71 72  1  0      
 72 73  2  0      
 73 74  1  0      
 69 74  2  0      
 63 69  1  0      
 75 76  1  0      
 76 77  2  0      
 77 78  1  0      
 78 79  2  0      
 79 80  1  0      
 75 80  2  0      
 71 75  1  0      
  1 73  1  0      
 82 81  1  6      
 82 83  1  1      
 82 84  1  0      
 84 85  1  0      
 85 82  1  0      
 84 86  1  6      
 86 87  1  0      
 88 89  1  0      
 85 89  1  1      
243244  1  0      
243245  1  0      
243246  1  0      
178243  1  0      
247248  1  0      
247249  1  0      
247250  1  0      
166247  1  0      
251252  1  0      
251253  1  0      
251254  1  0      
176251  1  0      
255256  1  0      
255257  1  0      
255258  1  0      
164255  1  0      
259260  1  0      
259261  1  0      
259262  1  0      
196259  1  0      
263264  1  0      
263265  1  0      
263266  1  0      
184263  1  0      
267268  1  0      
267269  1  0      
267270  1  0      
194267  1  0      
271272  1  0      
271273  1  0      
271274  1  0      
182271  1  0      
275276  1  0      
275277  1  0      
275278  1  0      
214275  1  0      
279280  1  0      
279281  1  0      
279282  1  0      
202279  1  0      
283284  1  0      
283285  1  0      
283286  1  0      
212283  1  0      
287288  1  0      
287289  1  0      
287290  1  0      
200287  1  0      
291292  1  0      
291293  1  0      
291294  1  0      
232291  1  0      
295296  1  0      
295297  1  0      
295298  1  0      
220295  1  0      
299300  1  0      
299301  1  0      
299302  1  0      
230299  1  0      
303304  1  0      
303305  1  0      
303306  1  0      
218303  1  0      
154234  1  0      
234155  1  0      
155156  1  0      
156157  1  0      
157158  2  0      
158159  1  0      
159160  2  0      
160161  1  0      
154161  1  0      
156161  2  0      
162163  1  0      
163164  2  0      
164165  1  0      
165166  2  0      
166167  1  0      
162167  2  0      
168169  1  0      
169170  2  0      
170171  1  0      
171172  2  0      
172173  1  0      
168173  2  0      
162168  1  0      
174175  1  0      
175176  2  0      
176177  1  0      
177178  2  0      
178179  1  0      
174179  2  0      
170174  1  0      
155172  1  0      
180181  1  0      
181182  2  0      
182183  1  0      
183184  2  0      
184185  1  0      
180185  2  0      
186187  1  0      
187188  2  0      
188189  1  0      
189190  2  0      
190191  1  0      
186191  2  0      
180186  1  0      
192193  1  0      
193194  2  0      
194195  1  0      
195196  2  0      
196197  1  0      
192197  2  0      
188192  1  0      
155190  1  0      
198199  1  0      
199200  2  0      
200201  1  0      
201202  2  0      
202203  1  0      
198203  2  0      
204205  1  0      
205206  2  0      
206207  1  0      
207208  2  0      
208209  1  0      
204209  2  0      
198204  1  0      
210211  1  0      
211212  2  0      
212213  1  0      
213214  2  0      
214215  1  0      
210215  2  0      
206210  1  0      
154208  1  0      
216217  1  0      
217218  2  0      
218219  1  0      
219220  2  0      
220221  1  0      
216221  2  0      
222223  1  0      
223224  2  0      
224225  1  0      
225226  2  0      
226227  1  0      
222227  2  0      
216222  1  0      
228229  1  0      
229230  2  0      
230231  1  0      
231232  2  0      
232233  1  0      
228233  2  0      
224228  1  0      
154226  1  0      
235234  1  6      
235236  1  1      
235237  1  0      
237238  1  0      
238235  1  0      
237239  1  1      
239240  1  0      
241242  1  0      
238242  1  6      
M  STY  1   1 SUP
M  SLB  1   1   1
M  SAL   1  4  90  91  92  93
M  SBL   1  1   4
M  SMT   1 CF3
M  SBV   1   4   -0.0288    0.8245
M  STY  1   2 SUP
M  SLB  1   2   2
M  SAL   2  4  94  95  96  97
M  SBL   2  1   8
M  SMT   2 CF3
M  SBV   2   8    0.7635   -0.3126
M  STY  1   3 SUP
M  SLB  1   3   3
M  SAL   3  4  98  99 100 101
M  SBL   3  1  12
M  SMT   3 CF3
M  SBV   3  12    0.7284   -0.3873
M  STY  1   4 SUP
M  SLB  1   4   4
M  SAL   4  4 102 103 104 105
M  SBL   4  1  16
M  SMT   4 CF3
M  SBV   4  16   -0.6480   -0.5054
M  STY  1   5 SUP
M  SLB  1   5   5
M  SAL   5  4 106 107 108 109
M  SBL   5  1  20
M  SMT   5 CF3
M  SBV   5  20   -0.6529   -0.5044
M  STY  1   6 SUP
M  SLB  1   6   6
M  SAL   6  4 110 111 112 113
M  SBL   6  1  24
M  SMT   6 CF3
M  SBV   6  24   -0.5226   -0.6384
M  STY  1   7 SUP
M  SLB  1   7   7
M  SAL   7  4 114 115 116 117
M  SBL   7  1  28
M  SMT   7 CF3
M  SBV   7  28    0.7632   -0.3132
M  STY  1   8 SUP
M  SLB  1   8   8
M  SAL   8  4 118 119 120 121
M  SBL   8  1  32
M  SMT   8 CF3
M  SBV   8  32   -0.2916    0.7718
M  STY  1   9 SUP
M  SLB  1   9   9
M  SAL   9  4 122 123 124 125
M  SBL   9  1  36
M  SMT   9 CF3
M  SBV   9  36   -0.3915   -0.7262
M  STY  1  10 SUP
M  SLB  1  10  10
M  SAL  10  4 126 127 128 129
M  SBL  10  1  40
M  SMT  10 CF3
M  SBV  10  40    0.8092    0.1609
M  STY  1  11 SUP
M  SLB  1  11  11
M  SAL  11  4 130 131 132 133
M  SBL  11  1  44
M  SMT  11 CF3
M  SBV  11  44   -0.4331    0.7022
M  STY  1  12 SUP
M  SLB  1  12  12
M  SAL  12  4 134 135 136 137
M  SBL  12  1  48
M  SMT  12 CF3
M  SBV  12  48   -0.5439    0.6203
M  STY  1  13 SUP
M  SLB  1  13  13
M  SAL  13  4 138 139 140 141
M  SBL  13  1  52
M  SMT  13 CF3
M  SBV  13  52   -0.7222    0.3988
M  STY  1  14 SUP
M  SLB  1  14  14
M  SAL  14  4 142 143 144 145
M  SBL  14  1  56
M  SMT  14 CF3
M  SBV  14  56    0.6838    0.4616
M  STY  1  15 SUP
M  SLB  1  15  15
M  SAL  15  4 146 147 148 149
M  SBL  15  1  60
M  SMT  15 CF3
M  SBV  15  60    0.7065    0.4261
M  STY  1  16 SUP
M  SLB  1  16  16
M  SAL  16  4 150 151 152 153
M  SBL  16  1  64
M  SMT  16 CF3
M  SBV  16  64    0.0579   -0.8230
M  STY  1  17 SUP
M  SLB  1  17  17
M  SAL  17  4 243 244 245 246
M  SBL  17  1 171
M  SMT  17 CF3
M  SBV  17 171   -0.0288    0.8245
M  STY  1  18 SUP
M  SLB  1  18  18
M  SAL  18  4 247 248 249 250
M  SBL  18  1 175
M  SMT  18 CF3
M  SBV  18 175    0.7635   -0.3126
M  STY  1  19 SUP
M  SLB  1  19  19
M  SAL  19  4 251 252 253 254
M  SBL  19  1 179
M  SMT  19 CF3
M  SBV  19 179    0.7284   -0.3873
M  STY  1  20 SUP
M  SLB  1  20  20
M  SAL  20  4 255 256 257 258
M  SBL  20  1 183
M  SMT  20 CF3
M  SBV  20 183   -0.6480   -0.5054
M  STY  1  21 SUP
M  SLB  1  21  21
M  SAL  21  4 259 260 261 262
M  SBL  21  1 187
M  SMT  21 CF3
M  SBV  21 187   -0.6529   -0.5044
M  STY  1  22 SUP
M  SLB  1  22  22
M  SAL  22  4 263 264 265 266
M  SBL  22  1 191
M  SMT  22 CF3
M  SBV  22 191   -0.5226   -0.6384
M  STY  1  23 SUP
M  SLB  1  23  23
M  SAL  23  4 267 268 269 270
M  SBL  23  1 195
M  SMT  23 CF3
M  SBV  23 195    0.7632   -0.3132
M  STY  1  24 SUP
M  SLB  1  24  24
M  SAL  24  4 271 272 273 274
M  SBL  24  1 199
M  SMT  24 CF3
M  SBV  24 199   -0.2916    0.7718
M  STY  1  25 SUP
M  SLB  1  25  25
M  SAL  25  4 275 276 277 278
M  SBL  25  1 203
M  SMT  25 CF3
M  SBV  25 203   -0.3915   -0.7262
M  STY  1  26 SUP
M  SLB  1  26  26
M  SAL  26  4 279 280 281 282
M  SBL  26  1 207
M  SMT  26 CF3
M  SBV  26 207    0.8092    0.1609
M  STY  1  27 SUP
M  SLB  1  27  27
M  SAL  27  4 283 284 285 286
M  SBL  27  1 211
M  SMT  27 CF3
M  SBV  27 211   -0.4331    0.7022
M  STY  1  28 SUP
M  SLB  1  28  28
M  SAL  28  4 287 288 289 290
M  SBL  28  1 215
M  SMT  28 CF3
M  SBV  28 215   -0.5439    0.6203
M  STY  1  29 SUP
M  SLB  1  29  29
M  SAL  29  4 291 292 293 294
M  SBL  29  1 219
M  SMT  29 CF3
M  SBV  29 219   -0.7222    0.3988
M  STY  1  30 SUP
M  SLB  1  30  30
M  SAL  30  4 295 296 297 298
M  SBL  30  1 223
M  SMT  30 CF3
M  SBV  30 223    0.6838    0.4616
M  STY  1  31 SUP
M  SLB  1  31  31
M  SAL  31  4 299 300 301 302
M  SBL  31  1 227
M  SMT  31 CF3
M  SBV  31 227    0.7065    0.4261
M  STY  1  32 SUP
M  SLB  1  32  32
M  SAL  32  4 303 304 305 306
M  SBL  32  1 231
M  SMT  32 CF3
M  SBV  32 231    0.0579   -0.8230
M  END
